# Supplementary material for: Camk2a-Cre and Tshz3 Expression in Mouse Striatal Cholinergic Interneurons: Implications for Autism Spectrum Disorder
Source: Frontiers journal article supplement (doi:10.3389/fgene.2021.683959), 2021-07-12
Supplement: Data_Sheet_1.pdf [file Data_Sheet_1.pdf]

## Supplementary Material

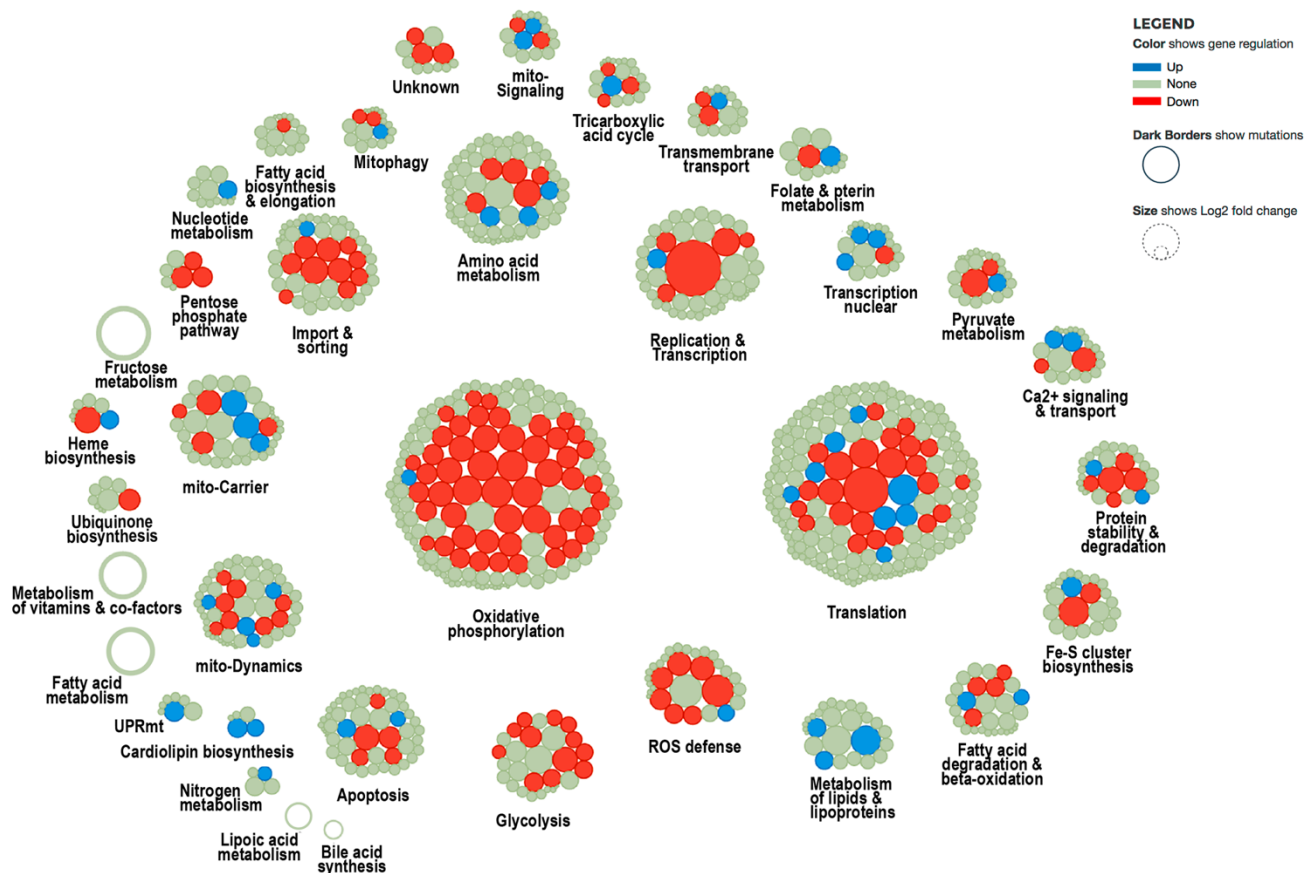

**Supplementary Figure 1. Interactome view of 36 mitochondrial processes within the DEGs.** Striatal DEGs are distributed in 31 mitochondrial processes, especially within oxidative phosphorylation, translation as well as replication and transcription. Individual bubbles represent genes of a process; blue and red, indicate up- or down-regulated genes within a process, respectively. Bubble size indicates log2 fold change values. This scheme was built using the “Interactome View” tool available on mitoXplorer web-platform <http://mitoxplorer.ibdm.univ-mrs.fr/index.php>.
