# Supplementary material for: Camk2a-Cre and Tshz3 Expression in Mouse Striatal Cholinergic Interneurons: Implications for Autism Spectrum Disorder
Source: Front Genet. 2021 Jul 12;12:683959. doi: 10.3389/fgene.2021.683959 (PMC8328143; doi:10.3389/fgene.2021.683959)
Supplement: Supplementary file 1 [file Table_1.xlsx]

## Sheet: A. striatum_2reps_deseq2
WT vs Camk2a-cKO DESeq2 results including normalized read counts and mean of samples
gene_id	BaseMean	Log2FC	P Value	FDR	Rank	estimatedDEG	ST_wt2	ST_wt3	ST_wt_mean	ST_ko1	ST_ko2	ST_ko_mean
Rplp1	13.0541	-1.22783	1.05513e-29	9.82659e-26	1	1	13316	12717	13016.5	6114.52	5000.52	5557.52
Slc6a7	10.4902	1.72745	1.29647e-29	9.82659e-26	2	1	783.101	797.752	790.427	3059	2175.86	2617.43
Rps21	11.7748	-1.10032	1.00873e-23	5.09713e-20	3	1	5387.95	4873.6	5130.78	2535.83	2250.31	2393.07
Cwc22	9.49142	1.49125	9.04165e-23	3.42656e-19	4	1	413.609	444.962	429.286	1125.23	1288.5	1206.86
Rplp2	10.41	-1.29942	8.50608e-19	2.57887e-15	5	1	2211.43	2057.63	2134.53	992.986	741.493	867.24
Ndufa13	11.6232	-1.00849	6.90558e-18	1.74469e-14	6	1	4787.94	4160.39	4474.17	2376.9	2071.02	2223.96
Tshz3	6.38684	-2.90338	1.62689e-15	3.52314e-12	7	1	228.312	229.473	228.893	23.2006	37.9863	30.5935
Grcc10	10.2868	-1.03244	7.05293e-15	1.33644e-11	8	1	1814.37	1758.87	1786.62	943.104	803.791	873.448
Ckb	14.0912	-0.891266	1.4435e-14	2.43133e-11	9	1	22983.5	24555.5	23769.5	14447	11183.2	12815.1
Rpl8	12.2268	-0.795326	1.78029e-14	2.69874e-11	10	1	6743.49	5885.57	6314.53	3642.49	3634.53	3638.51
Uqcr11	10.7256	-0.932953	2.43705e-14	3.35848e-11	11	1	2369.16	2309.99	2339.57	1314.31	1136.55	1225.43
Rasgrf2	9.50059	1.08894	9.00143e-14	1.13711e-10	12	1	488.611	504.714	496.662	1066.07	1046.9	1056.49
Uqcrq	10.9707	-1.01775	1.14335e-13	1.33323e-10	13	1	2898.58	2812.79	2855.68	1611.28	1209.49	1410.38
Ndufa2	10.8504	-0.848516	2.33109e-13	2.52407e-10	14	1	2503.72	2451.1	2477.41	1441.92	1309.77	1375.84
Atp5e	12.0169	-0.750417	3.81336e-13	3.85378e-10	15	1	5376.92	5373.86	5375.39	3394.25	2996.36	3195.31
Bola2	9.45532	-1.15988	5.1726e-13	4.90071e-10	16	1	1109.58	989.086	1049.33	509.253	430.005	469.629
Ndufb7	10.7103	-0.873167	1.07628e-12	9.59725e-10	17	1	2393.42	2141.54	2267.48	1287.63	1188.21	1237.92
Rps5	12.3345	-0.766281	2.83964e-12	2.32696e-09	18	1	7306	6165.26	6735.63	4097.23	3822.95	3960.09
Cox4i1	13.877	-0.806318	2.91657e-12	2.32696e-09	19	1	21390.8	18399.8	19895.3	12568.9	10184.9	11376.9
Rpl13a	12.4435	-0.815431	3.43862e-12	2.6063e-09	20	1	8196.09	6582.89	7389.49	4374.47	4023.51	4198.99
Elob	10.5292	-0.880322	6.06793e-12	4.38018e-09	21	1	2052.61	1957.2	2004.9	1173.95	1004.36	1089.15
Fkbp8	12.4612	-0.741289	1.01462e-11	6.99121e-09	22	1	7193.5	7387.63	7290.56	4768.88	3953.62	4361.25
Adora2a	13.1922	-0.651719	1.61101e-11	1.0618e-08	23	1	11510.5	11952.3	11731.4	7925.33	7009.24	7467.28
Dnah6	8.40973	-1.32544	1.82898e-11	1.15523e-08	24	1	545.964	530.776	538.37	216.926	212.723	214.825
Eef2	14.7103	-0.5974	2.26063e-11	1.37076e-08	25	1	33834.4	32111	32972.7	22737.7	20848.4	21793.1
Cox17	10.2881	-0.99267	3.2145e-11	1.87418e-08	26	1	1834.22	1693.4	1763.81	1011.55	761.246	886.396
Kcnc2	9.53937	0.9609	4.09799e-11	2.24277e-08	27	1	532.729	533.954	533.341	1012.71	1063.62	1038.16
Slc17a6	7.21578	2.31904	4.1426e-11	2.24277e-08	28	1	65.0746	68.0155	66.5451	200.685	463.433	332.059
Rplp0	11.3727	-0.848177	5.2221e-11	2.72972e-08	29	1	3926.53	3189.1	3557.82	2121.7	1830.94	1976.32
Vamp1	10.7552	0.729661	2.96281e-10	1.47031e-07	30	1	1357.74	1326.62	1342.18	2140.26	2311.09	2225.67
Snhg11	14.7369	0.533658	3.00676e-10	1.47031e-07	31	1	23045.2	22345.3	22695.3	33666.4	32040.7	32853.6
Pkig	10.289	-0.782397	3.24223e-10	1.5359e-07	32	1	1633.48	1648.26	1640.87	967.465	940.542	954.003
Pcsk1n	10.7424	-0.848534	5.724e-10	2.6294e-07	33	1	2044.89	2552.81	2298.85	1351.44	1201.89	1276.66
Abhd8	10.9879	-0.801434	7.60161e-10	3.38342e-07	34	1	2470.63	2891.61	2681.12	1672.76	1403.98	1538.37
Plcxd2	9.7368	1.02807	7.81184e-10	3.38342e-07	35	1	545.964	649.008	597.486	1383.92	1052.98	1218.45
Rgs14	10.5664	-0.727754	8.13874e-10	3.42709e-07	36	1	1930.18	1972.45	1951.31	1201.79	1154.78	1178.29
Rnasek	11.3732	-0.723582	8.81595e-10	3.61192e-07	37	1	3319.91	3497.4	3408.65	2250.46	1878.04	2064.25
Pvalb	9.71354	1.10342	9.20685e-10	3.67281e-07	38	1	619.863	525.69	572.776	1005.75	1455.64	1230.69
Baiap2	13.6996	-0.570145	1.87206e-09	7.27654e-07	39	1	16180.4	16241.1	16210.7	11613.1	10224.4	10918.7
Znhit1	9.63113	-0.892577	2.33739e-09	8.85814e-07	40	1	1022.44	1138.47	1080.45	607.856	556.12	581.988
Sod1	11.6745	-0.598945	4.18586e-09	1.54764e-06	41	1	4118.45	3927.1	4022.78	2584.55	2727.42	2655.98
Rps26	9.45157	-0.997502	4.69894e-09	1.69598e-06	42	1	1091.93	886.745	989.337	538.254	452.797	495.526
Timm13	10.2815	-0.79054	4.96571e-09	1.75058e-06	43	1	1680.91	1592.96	1636.94	1026.63	866.089	946.358
Mfge8	11.867	-0.571782	5.32399e-09	1.79554e-06	44	1	4618.09	4489.66	4553.87	3017.24	3110.32	3063.78
Uqcc2	10.6653	-0.757679	5.33011e-09	1.79554e-06	45	1	2115.47	2107.85	2111.66	1373.48	1124.4	1248.94
Naa38	9.93104	-0.860528	6.21939e-09	2.04956e-06	46	1	1429.43	1201.4	1315.42	762.14	686.793	724.466
Vsnl1	11.8959	0.794092	8.28423e-09	2.67193e-06	47	1	2437.54	3350.56	2894.05	5309.46	4727.02	5018.24
Fau	8.17492	-1.22246	8.86515e-09	2.79973e-06	48	1	445.595	437.334	441.464	196.045	182.334	189.19
C1qtnf4	8.63627	-1.15026	1.13198e-08	3.50199e-06	49	1	582.362	603.241	592.801	306.248	227.918	267.083
Ndufb10	11.5486	-0.604368	1.20669e-08	3.58802e-06	50	1	3873.59	3513.29	3693.44	2433.74	2425.05	2429.4
Ndufb11	10.6477	-0.665534	1.20713e-08	3.58802e-06	51	1	2043.78	1997.24	2020.51	1247.03	1300.65	1273.84
Crym	11.722	-0.614043	2.61937e-08	7.45045e-06	52	1	4473.6	3885.15	4179.37	2651.83	2809.47	2730.65
Tubb2b	12.1532	-0.609774	2.64635e-08	7.45045e-06	53	1	6075.1	5178.72	5626.91	3813.02	3561.6	3687.31
Syt5	11.3924	-0.595749	2.67961e-08	7.45045e-06	54	1	3186.45	3423.03	3304.74	2249.3	2124.2	2186.75
Eef1b2	12.3867	-0.550896	2.70318e-08	7.45045e-06	55	1	6830.62	6132.84	6481.73	4434.79	4414.01	4424.4
Cst3	14.1213	-0.554141	3.10788e-08	8.41293e-06	56	1	21816.5	21372.1	21594.3	13464.5	15949.7	14707.1
Grm4	10.5073	-0.664816	3.33323e-08	8.86463e-06	57	1	1836.43	1828.79	1832.61	1189.03	1122.88	1155.95
Rnd2	12.432	-0.580726	3.45502e-08	8.98248e-06	58	1	7261.88	6254.25	6758.07	4630.84	4406.42	4518.63
Ndufb8	11.6646	-0.616965	3.49605e-08	8.98248e-06	59	1	4310.36	3730.05	4020.21	2705.19	2537.49	2621.34
Dlgap3	12.9622	-0.616108	3.60058e-08	9.09687e-06	60	1	9201.98	10557	9879.51	7001.94	5889.4	6445.67
Eif4h	13.0814	-0.518582	3.98845e-08	9.91163e-06	61	1	10233.2	10514.4	10373.8	7612.12	6870.97	7241.54
Rps8	10.2046	-0.907133	4.17162e-08	1.01996e-05	62	1	1839.73	1392.09	1615.91	965.145	758.207	861.676
Chpf	9.58611	-0.830115	4.36853e-08	1.05115e-05	63	1	968.398	1081.26	1024.83	604.376	548.523	576.449
Ndufc1	10.333	-0.702592	4.57659e-08	1.08401e-05	64	1	1551.86	1739.16	1645.51	1025.47	996.762	1011.11
Romo1	8.99562	-1.07391	4.89468e-08	1.14151e-05	65	1	706.996	774.233	740.615	416.451	287.177	351.814
Insyn1	11.8101	-0.592118	5.30483e-08	1.21842e-05	66	1	4447.13	4370.16	4408.64	3146	2703.11	2924.55
Ppib	9.28575	-0.900582	5.57108e-08	1.26048e-05	67	1	823.91	881.659	852.785	498.813	414.811	456.812
Ccdc85b	9.85177	-0.757348	6.00634e-08	1.33897e-05	68	1	1141.56	1261.15	1201.36	708.778	712.624	710.701
Ndufs7	10.0854	-0.70139	6.25269e-08	1.37093e-05	69	1	1383.11	1387.64	1385.38	856.102	847.855	851.979
Rack1	12.3973	-0.598509	6.33056e-08	1.37093e-05	70	1	7260.78	6015.24	6638.01	4460.32	4307.65	4383.98
Gpx1	10.7981	-0.626489	6.55325e-08	1.39917e-05	71	1	2241.21	2183.49	2212.35	1489.48	1376.62	1433.05
Cystm1	10.6377	-0.635256	7.61215e-08	1.60267e-05	72	1	1927.97	2043.01	1985.49	1301.55	1255.07	1278.31
Atp9a	13.0684	-0.49606	7.97396e-08	1.65585e-05	73	1	10226.6	10175	10200.8	7546	6919.59	7232.79
Csnk1g2	11.3538	-0.676747	8.26102e-08	1.69228e-05	74	1	3179.83	3438.28	3309.06	2306.14	1833.98	2070.06
Bckdha	9.7456	-0.802334	8.619e-08	1.74207e-05	75	1	1179.06	1088.25	1133.66	702.978	597.145	650.062
Gm20594	5.97289	-2.43436	8.77126e-08	1.74952e-05	76	1	189.709	102.341	146.025	26.6807	27.3502	27.0154
Miat	11.4801	0.796888	9.02884e-08	1.77751e-05	77	1	2057.02	2277.57	2167.29	4456.84	3073.85	3765.35
Sphkap	10.0373	0.804003	9.54909e-08	1.85583e-05	78	1	706.996	883.566	795.281	1306.19	1470.83	1388.51
Rps19	10.4055	-0.952087	1.0142e-07	1.94612e-05	79	1	2250.04	1523.04	1886.54	1100.87	849.375	975.122
Ndufa7	10.7039	-0.669448	1.09409e-07	2.07243e-05	80	1	2195.99	2011.23	2103.61	1417.56	1227.72	1322.64
Fbl	8.50101	-1.16552	1.10737e-07	2.07243e-05	81	1	631.995	453.225	542.61	228.526	255.268	241.897
Tmcc2	12.2048	-0.551119	1.22746e-07	2.26916e-05	82	1	5331.7	6097.24	5714.47	3817.66	3982.49	3900.07
Selenom	10.0143	-0.728806	1.26657e-07	2.31324e-05	83	1	1357.74	1305.01	1331.38	856.102	750.61	803.356
Tmem223	9.09403	-0.906986	1.30289e-07	2.35126e-05	84	1	743.394	753.256	748.325	435.011	363.149	399.08
Caly	12.1662	-0.514154	1.78881e-07	3.19018e-05	85	1	5531.34	5453.96	5492.65	4014.86	3677.08	3845.97
Apoe	14.9965	-0.452953	1.89474e-07	3.33981e-05	86	1	39635.9	36854.3	38245.1	28530.9	27348.6	27939.8
Slc8a1	10.9271	0.622788	2.30613e-07	4.01824e-05	87	1	1487.89	1650.17	1569.03	2279.46	2552.68	2416.07
Pigyl	8.05009	-1.22264	3.00412e-07	5.17494e-05	88	1	412.507	397.287	404.897	204.165	142.829	173.497
Hapln4	8.83715	0.991153	3.05023e-07	5.19533e-05	89	1	305.52	343.256	324.388	731.979	557.639	644.809
Uqcr10	11.6311	-0.590688	3.12896e-07	5.23678e-05	90	1	4023.59	3761.2	3892.39	2809.59	2359.71	2584.65
Sipa1l3	10.151	-0.72137	3.14366e-07	5.23678e-05	91	1	1367.67	1552.28	1459.97	953.545	817.466	885.505
Meg3	16.039	0.445731	3.29082e-07	5.42234e-05	92	1	59627	55764.5	57695.8	75872.9	81290.8	78581.8
Crip2	11.6578	-0.555009	3.43819e-07	5.60426e-05	93	1	4068.81	3763.74	3916.28	2816.55	2514.7	2665.62
Bhlhe22	7.45275	1.63077	3.70307e-07	5.97179e-05	94	1	94.8544	104.248	99.5513	412.971	203.607	308.289
Dpm3	7.71534	-1.24864	3.77013e-07	6.01593e-05	95	1	331.991	315.923	323.957	125.283	147.387	136.335
Car11	12.7358	-0.517504	4.22771e-07	6.67581e-05	96	1	8070.35	8252.13	8161.24	6133.08	5269.46	5701.27
Rps15	13.2043	-0.574702	4.35215e-07	6.72631e-05	97	1	12834	10203	11518.5	7931.13	7536.49	7733.81
Gnb2	12.68	-0.580106	4.35246e-07	6.72631e-05	98	1	8453.07	7594.86	8023.97	5914.99	4819.71	5367.35
Mrpl20	10.6939	-0.6208	4.3928e-07	6.72631e-05	99	1	2007.38	2100.85	2054.12	1425.68	1245.95	1335.81
Smdt1	10.7188	-0.640422	4.49042e-07	6.80703e-05	100	1	2031.65	2176.5	2104.07	1462.8	1236.84	1349.82
Kcnj4	12.168	-0.587082	4.59033e-07	6.88959e-05	101	1	5957.08	5323.65	5640.36	4113.47	3395.98	3754.72
Mrpl53	8.88838	-0.880744	4.70224e-07	6.98836e-05	102	1	652.951	633.117	643.034	359.609	338.838	349.224
Nr4a3	10.0764	-0.695178	4.97793e-07	7.32626e-05	103	1	1268.4	1479.18	1373.79	849.142	847.855	848.499
Fasn	12.2893	-0.517626	5.055e-07	7.36815e-05	104	1	6099.36	5878.58	5988.97	4460.32	3906.52	4183.42
Camk2d	10.2115	0.787384	5.22877e-07	7.50765e-05	105	1	868.028	936.962	902.495	1317.79	1797.51	1557.65
Ppp1ca	13.513	-0.524374	5.24976e-07	7.50765e-05	106	1	14775.2	13264.9	14020.1	10492.5	9002.76	9747.62
Dohh	9.56996	-0.748194	5.69975e-07	8.075e-05	107	1	998.178	971.923	985.05	618.296	554.601	586.448
Gpr6	10.974	-0.551774	6.15657e-07	8.64142e-05	108	1	2418.79	2451.74	2435.26	1698.28	1624.3	1661.29
Tmem215	5.00202	2.84482	6.59951e-07	9.17462e-05	109	1	9.92663	13.9845	11.9556	112.523	59.2587	85.8908
Luc7l3	12.507	0.452785	6.65749e-07	9.17462e-05	110	1	4964.42	4986.75	4975.58	6788.5	6831.46	6809.98
Tafa1	7.37415	1.72327	7.82971e-07	0.000106928	111	1	73.8982	108.698	91.298	412.971	189.932	301.451
Met	4.9464	2.90791	8.36009e-07	0.000113152	112	1	6.61775	15.8915	11.2546	102.083	66.856	84.4693
Pnisr	12.6323	0.446992	9.04515e-07	0.000121341	113	1	5539.06	5336.36	5437.71	7395.19	7430.13	7412.66
Mbd3	10.9785	-0.561804	1.05906e-06	0.000139732	114	1	2553.35	2349.4	2451.37	1716.84	1604.54	1660.69
Tomm6	10.3602	-0.630324	1.0634e-06	0.000139732	115	1	1661.06	1609.49	1635.27	1125.23	987.645	1056.44
Edf1	9.92434	-0.691252	1.06926e-06	0.000139732	116	1	1254.06	1215.38	1234.72	821.301	708.065	764.683
Abhd17a	10.7591	-0.646654	1.08767e-06	0.000140923	117	1	2146.36	2190.48	2168.42	1544	1226.2	1385.1
Nomo1	12.0173	-0.487518	1.14636e-06	0.000147268	118	1	4727.28	5089.72	4908.5	3598.41	3403.58	3500.99
Atp5g3	12.5334	-0.446564	1.16687e-06	0.000148644	119	1	6871.43	6969.37	6920.4	5163.29	4992.92	5078.11
Iqsec3	10.9074	0.560979	1.30045e-06	0.000164279	120	1	1522.08	1640.64	1581.36	2242.34	2423.53	2332.93
P4htm	10.2465	-0.613134	1.33039e-06	0.000166672	121	1	1465.83	1538.93	1502.38	1001.11	963.334	982.22
Hdac5	12.2143	-0.466086	1.34508e-06	0.000167132	122	1	5457.44	5712.67	5585.05	4149.43	3936.9	4043.17
Tmbim6	13.3406	-0.422852	1.37328e-06	0.000169248	123	1	12223	11799.1	12011	9051.71	8867.53	8959.62
Dynll1	11.5412	-0.707223	1.45044e-06	0.000177316	124	1	3167.7	4448.34	3808.02	2505.66	2159.14	2332.4
Lmf1	9.19708	-0.772579	1.54701e-06	0.000187609	125	1	763.247	771.055	767.151	460.532	437.603	449.067
Snhg8	9.62081	-0.745308	1.61989e-06	0.000194888	126	1	1110.68	928.063	1019.37	596.255	619.937	608.096
Rex1bd	8.9477	-0.930094	1.64738e-06	0.000196635	127	1	668.393	694.776	681.584	417.611	297.813	357.712
Krtcap2	9.32602	-0.745743	1.68185e-06	0.000199181	128	1	820.601	841.613	831.107	508.093	483.186	495.64
Zscan26	10.9494	0.528225	1.72361e-06	0.000202544	129	1	1636.79	1656.53	1646.66	2330.5	2418.97	2374.74
Nr2f2	8.69038	1.13236	1.75515e-06	0.000204101	130	1	250.372	307.659	279.015	460.532	762.766	611.649
Gt(ROSA)26Sor	7.87929	-1.14491	1.76379e-06	0.000204101	131	1	380.521	319.737	350.129	164.724	151.945	158.335
Prdx5	11.5069	-0.518827	1.88937e-06	0.000216977	132	1	3611.09	3355.65	3483.37	2549.75	2312.61	2431.18
Adgrb2	12.4964	-0.51947	1.99938e-06	0.000226756	133	1	6536.13	7299.91	6918.02	5200.41	4452	4826.21
Rasl10b	15.1669	-0.397417	2.00444e-06	0.000226756	134	1	43221.6	41214.2	42217.9	32344	31761.1	32052.5
Tmem181b-ps	11.2296	0.718363	2.10508e-06	0.000236377	135	1	2006.28	1737.89	1872.09	3627.41	2532.93	3080.17
Snrpb	9.91665	-0.641029	2.40107e-06	0.000267486	136	1	1168.03	1245.89	1206.96	776.06	771.882	773.971
Ddah2	8.15914	-1.0987	2.41741e-06	0.000267486	137	1	448.904	387.752	418.328	225.046	165.62	195.333
Vgf	12.1508	-0.545038	2.4529e-06	0.000269446	138	1	4915.89	6069.91	5492.9	3843.18	3686.19	3764.69
Uchl1	12.9506	-0.454245	2.63569e-06	0.000287441	139	1	9358.6	9173.2	9265.9	7159.71	6366.51	6763.11
Mbp	17.1388	-0.449027	3.01109e-06	0.000326036	140	1	155878	181336	168607	120101	126920	123511
Cdh19	8.24407	1.02274	3.05863e-06	0.000328835	141	1	186.4	239.008	212.704	417.611	446.719	432.165
Tpt1	7.90866	-1.22487	3.24258e-06	0.000346157	142	1	287.872	446.869	367.37	162.404	151.945	157.175
Ptprk	9.06764	0.883245	3.34653e-06	0.000354756	143	1	366.182	423.985	395.084	837.542	619.937	728.739
Atpif1	11.6361	-0.509613	3.7917e-06	0.000399156	144	1	3955.21	3640.42	3797.82	2828.15	2507.1	2667.63
Rpl41	11.1304	-0.508607	3.97591e-06	0.000415661	145	1	2778.35	2569.34	2673.84	1883.89	1875.01	1879.45
A330023F24Rik	11.0625	0.551221	4.05962e-06	0.000421505	146	1	1894.88	1638.73	1766.81	2477.82	2700.07	2588.95
Junb	8.57998	-1.12757	4.26334e-06	0.000439646	147	1	484.199	647.101	565.65	324.808	192.971	258.89
Ttc14	11.6778	0.494067	4.33186e-06	0.000443694	148	1	2923.94	2597.3	2760.62	3772.42	4003.76	3888.09
Map1s	9.03433	-0.771045	5.35018e-06	0.000541856	149	1	661.775	708.125	684.95	415.291	387.461	401.376
Ppm1e	10.6321	0.690941	5.36172e-06	0.000541856	150	1	1050.02	1448.03	1249.02	1922.17	2110.52	2016.35
Srsf11	11.9127	0.444378	5.43752e-06	0.000545876	151	1	3260.35	3349.92	3305.14	4591.4	4403.38	4497.39
Rps10	8.01091	-1.05783	5.72685e-06	0.000571141	152	1	354.05	390.295	372.172	199.525	158.023	178.774
Kcnab3	8.31663	1.0551	5.79948e-06	0.000574603	153	1	229.415	212.946	221.181	554.494	364.669	459.582
Nos1ap	11.7532	0.583867	5.95925e-06	0.000586599	154	1	2854.46	2784.82	2819.64	4816.44	3636.05	4226.25
Penk	15.4206	-0.40438	6.39938e-06	0.000625859	155	1	53167	47751.4	50459.2	38567.5	37682.4	38125
Tac1	12.7413	-0.415695	7.06223e-06	0.00067715	156	1	7712.99	8103.39	7908.19	6069.28	5787.6	5928.44
Use1	10.4787	-0.623928	7.06981e-06	0.00067715	157	1	1952.24	1590.42	1771.33	1201.79	1097.05	1149.42
Id3	8.44273	-0.885037	7.09712e-06	0.00067715	158	1	463.243	482.465	472.854	259.847	252.229	256.038
Taldo1	11.6032	-0.497881	7.1025e-06	0.00067715	159	1	3885.72	3508.2	3696.96	2756.23	2479.75	2617.99
Ap1s1	13.6312	-0.434947	7.23458e-06	0.00068198	160	1	15536.3	13968.6	14752.4	11401.9	10423.5	10912.7
Pin1	10.2447	-0.594787	7.24314e-06	0.00068198	161	1	1502.23	1479.81	1491.02	1056.79	917.75	987.269
Camk2b	15.6268	-0.424964	7.332e-06	0.000686085	162	1	60409	56845.7	58627.4	46603	40735	43669
Ndufb9	12.1199	-0.474314	7.55118e-06	0.00070226	163	1	5595.31	4897.12	5246.21	3886.1	3666.44	3776.27
Scn1a	11.415	0.475503	7.85053e-06	0.000722963	164	1	2364.74	2266.76	2315.75	3353.65	3086.01	3219.83
Dnpep	9.99544	-0.624496	7.86918e-06	0.000722963	165	1	1316.93	1217.92	1267.43	872.343	771.882	822.113
Gabra3	10.7686	0.545654	8.04027e-06	0.000734231	166	1	1340.09	1547.83	1443.96	2097.33	2118.12	2107.73
Aarsd1	10.566	-0.558189	8.17663e-06	0.000742212	167	1	1930.18	1748.7	1839.44	1302.71	1195.81	1249.26
Asphd2	11.5206	-0.481527	8.6388e-06	0.000779497	168	1	3498.58	3444.64	3471.61	2634.43	2338.44	2486.43
Cdc37	11.2378	-0.485541	8.77362e-06	0.000786978	169	1	2823.57	2891.61	2857.59	2130.98	1950.98	2040.98
Kcna5	9.24838	-0.791343	9.57013e-06	0.000853374	170	1	785.307	814.915	800.111	389.77	534.848	462.309
Nefh	9.45653	0.719857	9.72706e-06	0.000862296	171	1	539.347	555.566	547.457	805.061	998.281	901.671
Bsg	13.1962	-0.409467	9.8761e-06	0.000870417	172	1	11228.1	10405.1	10816.6	8359.18	7928.51	8143.84
Aip	11.0369	-0.519587	1.00494e-05	0.000880571	173	1	2449.67	2581.41	2515.54	1874.61	1634.93	1754.77
Polr2e	9.96695	-0.640164	1.05406e-05	0.000918302	174	1	1348.92	1149.91	1249.41	837.542	765.805	801.673
Cadps2	9.43241	0.890661	1.09678e-05	0.000945796	175	1	422.433	592.435	507.434	1106.67	774.921	940.795
Dok4	9.94926	-0.668339	1.10591e-05	0.000945796	176	1	1223.18	1269.41	1246.3	881.623	686.793	784.208
Palm	11.8802	-0.47395	1.11019e-05	0.000945796	177	1	4347.86	4537.34	4442.6	3426.73	2970.53	3198.63
Ndufa8	11.3046	-0.53576	1.11057e-05	0.000945796	178	1	3133.51	2957.72	3045.61	2308.46	1893.24	2100.85
Islr2	10.4235	-0.656329	1.13674e-05	0.000962671	179	1	1474.66	1973.72	1724.19	1118.27	1069.7	1093.98
Ndufb6	10.5337	-0.577079	1.16046e-05	0.0009773	180	1	1721.72	1899.35	1810.53	1311.99	1115.28	1213.64
Srsf6	11.7803	0.428883	1.1836e-05	0.00099128	181	1	3045.27	3018.11	3031.69	4050.83	4111.64	4081.23
Slc35c2	10.4585	-0.607426	1.19596e-05	0.000996131	182	1	1759.22	1714.37	1736.8	1272.55	1007.4	1139.98
Tnk2	11.6104	-0.477144	1.25221e-05	0.00103728	183	1	3437.92	3939.82	3688.87	2647.19	2652.97	2650.08
Itm2c	14.7884	-0.394865	1.26593e-05	0.00104295	184	1	34031.8	30862.5	32447.2	25310.7	24045.4	24678
Gng2	11.6577	0.507974	1.30044e-05	0.00106559	185	1	2467.32	2951.37	2709.34	3995.14	3710.51	3852.82
2410006H16Rik	7.96043	-1.05872	1.37148e-05	0.00111776	186	1	403.683	315.287	359.485	185.605	159.543	172.574
Rps3	14.0389	-0.479494	1.39623e-05	0.00113184	187	1	22012.8	17737.4	19875.1	13700	14810.1	14255
Pltp	10.7217	-0.561753	1.43361e-05	0.00115596	188	1	2222.46	1880.92	2051.69	1321.27	1458.68	1389.97
Rprml	9.28546	-0.818765	1.47121e-05	0.00118001	189	1	788.615	868.946	828.781	556.814	382.902	469.858
C030023E24Rik	10.903	0.488828	1.53945e-05	0.00122824	190	1	1561.79	1671.15	1616.47	2246.98	2289.82	2268.4
Nop53	9.46074	-0.646235	1.69115e-05	0.00134221	191	1	884.573	878.481	881.527	571.895	554.601	563.248
Dctn3	11.1148	-0.500534	1.74854e-05	0.00138053	192	1	2580.92	2694.56	2637.74	1995.25	1733.7	1864.47
Igsf8	11.0813	-0.505841	1.76174e-05	0.00138374	193	1	2426.51	2737.15	2581.83	1901.29	1735.22	1818.25
Prpf39	10.5668	0.514304	1.80168e-05	0.00140782	194	1	1290.46	1247.8	1269.13	1745.85	1879.56	1812.7
1700037H04Rik	10.6833	-0.597727	1.81502e-05	0.00141096	195	1	2239.01	1806.54	2022.77	1238.91	1434.36	1336.64
Aldh1l1	11.0575	-0.562151	1.92155e-05	0.00148616	196	1	2351.51	2828.05	2589.78	1898.97	1609.1	1754.04
Resp18	9.44588	0.924699	1.9321e-05	0.00148674	197	1	509.567	502.807	506.187	692.538	1229.24	960.888
Fbll1	8.66515	-0.817524	1.94203e-05	0.00148683	198	1	493.022	584.807	538.915	301.608	309.969	305.788
Rabac1	10.4812	-0.515801	2.00563e-05	0.00152124	199	1	1684.22	1734.08	1709.15	1223.83	1166.94	1195.39
Lime1	9.85764	0.611849	2.00704e-05	0.00152124	200	1	698.173	802.838	750.505	1178.59	1115.28	1146.93
Tesc	10.785	-0.520993	2.11269e-05	0.00159335	201	1	2205.92	2021.4	2113.66	1560.24	1385.74	1472.99
Ap2s1	11.1133	-0.462926	2.12994e-05	0.00159841	202	1	2561.07	2640.53	2600.8	1933.77	1840.06	1886.91
Lrrc4b	10.8028	-0.58065	2.17143e-05	0.00162151	203	1	1980.91	2388.17	2184.54	1590.4	1331.04	1460.72
Prxl2b	10.5277	-0.506964	2.23996e-05	0.00166448	204	1	1782.38	1737.26	1759.82	1211.07	1265.7	1238.39
Ints6l	10.4078	0.557525	2.25755e-05	0.00166937	205	1	1214.36	1025.32	1119.84	1690.16	1606.06	1648.11
Cnpy2	9.7454	-0.59454	2.35108e-05	0.0017301	206	1	1072.08	1037.4	1054.74	704.138	692.871	698.505
Hddc3	8.87236	-0.824573	2.42179e-05	0.00177352	207	1	702.585	544.76	623.672	325.968	378.344	352.156
Lpl	12.1097	0.483126	2.45899e-05	0.00179211	208	1	3371.74	4104.45	3738.1	5387.18	5062.82	5225
Pdyn	11.881	-0.5472	2.52634e-05	0.00183238	209	1	4909.27	4209.34	4559.3	2731.87	3508.42	3120.14
Prrc2a	12.642	-0.394418	2.6816e-05	0.00193573	210	1	7260.78	7395.26	7328.02	5785.07	5365.19	5575.13
Sucla2	11.6203	0.455282	2.70543e-05	0.00194368	211	1	2589.75	2787.37	2688.56	3487.05	3885.24	3686.15
Psd	13.0439	-0.378646	2.81608e-05	0.00201363	212	1	9846.11	9412.21	9629.16	7563.4	7249.31	7406.35
Rps9	12.3487	-0.470003	2.86084e-05	0.00203603	213	1	6705.99	5571.55	6138.77	4258.47	4605.46	4431.97
Lrfn4	8.8182	-0.861275	2.91715e-05	0.0020664	214	1	561.406	655.365	608.385	393.25	276.541	334.895
Adamts4	10.9376	0.534613	2.937e-05	0.00207079	215	1	1532.01	1727.09	1629.55	2157.66	2563.32	2360.49
Ptpn5	13.9325	-0.416121	2.9581e-05	0.00207173	216	1	18775.7	17345.9	18060.8	14500.4	12570.4	13535.4
Tmem119	9.79445	-0.580685	2.96566e-05	0.00207173	217	1	1066.56	1105.41	1085.99	736.619	715.663	726.141
Nrbp2	11.1344	0.494658	2.99487e-05	0.00208253	218	1	1745.98	2041.74	1893.86	2617.03	2719.82	2668.42
C1qa	10.3768	-0.541958	3.15252e-05	0.00218215	219	1	1695.25	1513.5	1604.38	1052.15	1151.75	1101.95
Ndufc2	10.7836	-0.479303	3.252e-05	0.00224078	220	1	2075.77	2086.87	2081.32	1436.12	1549.84	1492.98
Anapc11	9.61738	-0.667839	3.28375e-05	0.00225242	221	1	879.058	1100.96	990.01	646.137	600.184	623.16
Map3k10	11.4249	-0.493969	3.32154e-05	0.00226807	222	1	3048.58	3477.06	3262.82	2483.62	2150.03	2316.83
Egr2	9.33261	-0.811567	3.37945e-05	0.00229727	223	1	813.983	894.373	854.178	590.455	382.902	486.679
Phf2	9.98656	-0.549921	3.77871e-05	0.00254818	224	1	1194.5	1260.51	1227.51	830.582	846.336	838.459
Frzb	7.08557	1.32433	3.78218e-05	0.00254818	225	1	70.5893	101.07	85.8296	250.566	179.296	214.931
Aldoa	14.7124	-0.386502	3.80592e-05	0.00255283	226	1	30938	30449.4	30693.7	25049.7	21910.5	23480.1
Zfp523	10.9999	-0.521443	3.94513e-05	0.00263454	227	1	2496	2411.06	2453.53	1888.53	1530.09	1709.31
Ogt	13.3004	0.361854	3.98172e-05	0.00264732	228	1	8920.73	8877.62	8899.17	11161.8	11710.4	11436.1
C1qc	9.64567	-0.613404	4.06456e-05	0.00268888	229	1	986.045	995.443	990.744	596.255	698.949	647.602
BC031181	10.7492	-0.475309	4.0797e-05	0.00268888	230	1	2089	1969.91	2029.46	1444.24	1475.39	1459.81
Nme3	8.51166	-0.803596	4.18178e-05	0.00274423	231	1	490.817	473.566	482.191	291.168	261.346	276.257
Fam163a	7.8024	1.05413	4.20157e-05	0.00274533	232	1	173.164	136.667	154.916	272.607	370.747	321.677
Dpysl2	13.8814	0.408218	4.25508e-05	0.0027532	233	1	13458.3	12741.2	13099.7	16046.7	18721.2	17383.9
D8Ertd738e	9.88335	-0.579919	4.26398e-05	0.0027532	234	1	1161.42	1148	1154.71	824.781	720.221	772.501
Micu3	11.5853	0.413112	4.26811e-05	0.0027532	235	1	2709.97	2615.74	2662.85	3589.13	3502.34	3545.74
Ndufa11	11.1092	-0.495417	4.43755e-05	0.00285038	236	1	2741.96	2503.86	2622.91	2005.69	1715.46	1860.58
Por	10.8915	-0.505104	4.5364e-05	0.00290157	237	1	2272.09	2254.05	2263.07	1736.57	1452.6	1594.58
Atp5c1	12.5151	-0.424724	4.59998e-05	0.00292988	238	1	7138.35	6425.24	6781.8	5339.62	4765.01	5052.31
Kcnip1	8.00023	0.953228	4.75781e-05	0.0030067	239	1	170.959	197.054	184.006	319.008	393.538	356.273
Dmwd	11.116	-0.447279	4.76026e-05	0.0030067	240	1	2577.61	2605.57	2591.59	1972.05	1829.42	1900.74
Atp5d	11.4415	-0.512213	4.97573e-05	0.00312975	241	1	3605.57	3037.18	3321.38	2524.23	2133.31	2328.77
Irs4	5.01273	2.92318	5.02562e-05	0.00314807	242	1	8.82367	14.6202	11.7219	24.3606	153.465	88.9127
Rsrp1	11.939	0.415415	5.11936e-05	0.0031936	243	1	3586.82	3213.26	3400.04	4586.76	4482.39	4534.57
Wwc1	11.3303	-0.430956	5.18977e-05	0.00322425	244	1	2890.85	3088.67	2989.76	2250.46	2184.97	2217.72
Arhgdia	13.1902	-0.382958	5.29383e-05	0.00327547	245	1	10732.9	10613	10672.9	8639.9	7729.46	8184.68
Ptpn3	8.48783	1.00657	5.39788e-05	0.00332628	246	1	212.871	293.675	253.273	628.736	388.98	508.858
Asic4	11.8016	-0.532631	5.63265e-05	0.0034569	247	1	4321.39	4265.27	4293.33	3415.13	2520.77	2967.95
Sf3b5	8.16122	-0.953184	5.66325e-05	0.00346166	248	1	369.491	427.163	398.327	241.286	170.179	205.733
Gaa	12.7719	-0.389012	6.00619e-05	0.00365522	249	1	7900.49	8106.56	8003.53	5767.67	6456.16	6111.91
Cadps	11.7836	0.445317	6.02814e-05	0.00365522	250	1	2786.07	3256.48	3021.28	4213.23	4014.4	4113.81
Bcr	13.3461	-0.36113	6.52846e-05	0.00394282	251	1	12175.6	11427.9	11801.7	9395.08	8981.49	9188.29
Psmb6	11.4978	-0.499767	6.55885e-05	0.00394546	252	1	3687.19	3190.37	3438.78	2662.27	2201.69	2431.98
Slc32a1	12.6189	-0.377116	6.65549e-05	0.00397666	253	1	6916.65	7420.05	7168.35	5394.14	5644.77	5519.45
Aplp1	15.0334	-0.33537	6.66318e-05	0.00397666	254	1	36869.7	38469.5	37669.6	30382.3	29330	29856.2
Ndufs6	10.6785	-0.461378	6.69825e-05	0.00398191	255	1	1945.62	1900.62	1923.12	1400.16	1393.34	1396.75
Git1	12.3913	-0.417475	6.86898e-05	0.00406746	256	1	5768.47	6648.36	6208.42	4793.24	4503.66	4648.45
Znrd2	8.32775	-0.817052	7.24212e-05	0.00427172	257	1	404.786	448.14	426.463	247.086	237.035	242.061
Kcng4	5.92722	1.67026	7.59048e-05	0.00445985	258	1	31.9858	36.2326	34.1092	98.6026	118.517	108.56
Ubc	11.4853	-0.478098	7.9421e-05	0.00464843	259	1	3356.3	3410.95	3383.63	2690.11	2168.26	2429.18
Inf2	13.1539	-0.403229	8.06391e-05	0.00470157	260	1	9901.26	11061.1	10481.2	8410.22	7440.76	7925.49
Kcnj3	10.0005	0.704331	8.14677e-05	0.00473168	261	1	691.555	913.442	802.499	1519.64	1095.53	1307.58
Khdc4	11.032	0.434181	8.19973e-05	0.00474427	262	1	1774.66	1828.16	1801.41	2369.94	2497.98	2433.96
Paxbp1	10.4716	0.481225	8.3674e-05	0.00481724	263	1	1223.18	1180.42	1201.8	1612.44	1742.81	1677.63
Rab1b	11.7035	-0.431832	8.38941e-05	0.00481724	264	1	3958.52	3788.53	3873.52	3076.4	2666.64	2871.52
Pex6	10.0603	-0.51569	8.83583e-05	0.00505443	265	1	1262.89	1290.39	1276.64	915.264	870.647	892.955
Pou3f1	10.4091	-0.506783	8.88504e-05	0.00506347	266	1	1613.63	1627.92	1620.78	1223.83	1057.54	1140.69
C2cd2l	12.4696	-0.42289	8.93943e-05	0.00507539	267	1	6539.44	6594.97	6567.2	5340.78	4456.56	4898.67
Arpc1b	9.47052	-0.613499	9.0415e-05	0.00509657	268	1	820.601	934.419	877.51	598.576	548.523	573.549
Neurl1a	12.7814	-0.39185	9.07018e-05	0.00509657	269	1	8563.37	7565.62	8064.49	6315.2	5977.53	6146.37
Galnt18	9.82089	-0.595009	9.0776e-05	0.00509657	270	1	1064.36	1158.81	1111.58	810.861	660.962	735.912
Smpd1	11.096	-0.429938	9.5356e-05	0.00531342	271	1	2449.67	2631.63	2540.65	1905.93	1865.89	1885.91
Icam5	11.2912	-0.462508	9.54008e-05	0.00531342	272	1	2802.62	3081.04	2941.83	2299.18	1970.73	2134.96
Nsg2	15.5347	-0.327787	9.569e-05	0.00531342	273	1	52196.4	54162.6	53179.5	43407.2	41335.2	42371.2
Stard10	10.5685	-0.464719	9.62241e-05	0.00532358	274	1	1761.42	1806.54	1783.98	1252.83	1332.56	1292.7
Ahdc1	9.99408	-0.524328	0.000100545	0.00554239	275	1	1182.37	1263.69	1223.03	822.461	878.244	850.353
Arpc4	12.3782	-0.417945	0.000102099	0.00560527	276	1	6464.44	5842.34	6153.39	4926.65	4284.86	4605.75
Sfrp1	9.77241	-0.568858	0.000102425	0.00560527	277	1	1089.72	1040.57	1065.15	769.1	667.04	718.07
Actn4	11.4775	-0.440417	0.000106213	0.00579165	278	1	3290.13	3353.1	3321.61	2643.71	2251.83	2447.77
Pitpnm1	10.9001	-0.456662	0.000113006	0.00613997	279	1	2263.27	2214	2238.64	1735.4	1527.05	1631.23
Serpini1	11.4281	0.574356	0.000114861	0.00621848	280	1	1924.66	2591.58	2258.12	3752.7	2972.05	3362.37
Rbm39	12.4888	0.380127	0.000115368	0.00622373	281	1	5068.09	5008.36	5038.23	6189.92	6924.15	6557.04
Lrp1	12.7852	-0.394912	0.000119367	0.00641661	282	1	8493.88	7694.66	8094.27	6522.85	5789.12	6155.98
Pdlim2	9.68137	-0.561191	0.00012058	0.0064589	283	1	945.236	1049.47	997.355	687.898	664.001	675.95
Ppp1r9b	14.6488	-0.361051	0.000123403	0.00658687	284	1	27255.2	30968.1	29111.6	23172.8	22159.7	22666.2
Tsc22d4	10.6527	-0.506161	0.000124195	0.00660587	285	1	1722.82	2114.2	1918.51	1338.67	1362.95	1350.81
Gnb5	13.1457	-0.346343	0.00012596	0.00667633	286	1	10351.3	10084.7	10218	8287.25	7787.2	8037.23
Enho	9.47752	-0.57787	0.000127014	0.00670874	287	1	848.175	893.737	870.956	563.775	603.223	583.499
Kcnj16	8.49504	0.879889	0.000128424	0.00675967	288	1	254.783	277.147	265.965	386.29	592.587	489.438
Ftx	10.2783	0.531483	0.000137925	0.00723461	289	1	1144.87	921.07	1032.97	1489.48	1496.66	1493.07
Rpl18a	10.2295	-0.599883	0.000138789	0.00725485	290	1	1701.87	1254.16	1478.01	1002.27	948.139	975.203
Dctn1	12.2865	-0.38816	0.000140196	0.00730318	291	1	5415.53	6014.61	5715.07	4526.44	4207.37	4366.9
Rpl14	9.46884	-0.700856	0.000142186	0.0073815	292	1	1038.99	767.876	903.432	610.176	501.42	555.798
Egln2	10.6457	-0.540978	0.000143638	0.00743142	293	1	1727.23	2137.72	1932.48	1445.4	1211	1328.2
Srebf2	11.8319	-0.407619	0.000146169	0.00753666	294	1	3980.58	4416.56	4198.57	3314.21	3016.12	3165.16
Vtn	11.3047	-0.439308	0.000148654	0.00762006	295	1	3165.49	2725.71	2945.6	2209.86	2134.83	2172.34
Ndst3	7.56828	0.958939	0.000148792	0.00762006	296	1	144.488	127.768	136.128	263.327	265.904	264.616
Srp14	11.3228	-0.411823	0.0001501	0.00766115	297	1	2994.53	2914.5	2954.52	2323.54	2118.12	2220.83
Ncor2	10.2832	-0.530237	0.000153629	0.00780567	298	1	1355.54	1639.37	1497.45	1084.63	989.164	1036.9
Dipk2a	9.5085	0.578716	0.000153961	0.00780567	299	1	598.907	593.07	595.988	830.582	949.658	890.12
Dcakd	9.13245	-0.626785	0.000155584	0.00786168	300	1	686.04	708.76	697.4	473.292	430.005	451.649
Btbd17	8.96537	-0.737581	0.000158712	0.00799308	301	1	571.333	719.566	645.449	433.851	340.358	387.104
Gsn	11.8043	-0.404304	0.000160651	0.00806394	302	1	4363.3	3865.44	4114.37	3020.72	3196.93	3108.82
Slc12a9	9.79909	-0.567534	0.000165391	0.00827449	303	1	1127.22	1041.85	1084.53	798.101	665.521	731.811
Laptm5	10.4629	-0.510153	0.000166976	0.00832628	304	1	1838.63	1530.03	1684.33	1222.67	1142.63	1182.65
Ndufv1	11.8394	-0.445148	0.000167603	0.00833014	305	1	4474.7	4077.12	4275.91	3447.61	2833.78	3140.7
Esrrg	9.31494	0.670574	0.000169039	0.00837404	306	1	510.67	498.993	504.831	683.258	923.828	803.543
Ddt	9.78727	-0.551245	0.000171118	0.00844942	307	1	1026.85	1112.4	1069.63	780.7	679.196	729.948
Drd2	13.1466	-0.366398	0.000172287	0.00847952	308	1	10833.3	9759.28	10296.3	8297.7	7676.28	7986.99
Coro6	7.55077	1.03686	0.000179266	0.00879448	309	1	158.826	102.977	130.901	281.887	255.268	268.578
Serpina9	11.2252	-0.400862	0.000180109	0.00880734	310	1	2674.67	2826.78	2750.73	2097.33	2069.5	2083.42
Adcy5	15.2498	-0.341255	0.000185283	0.00898729	311	1	44475.7	43235	43855.4	36659.3	32575.6	34617.4
Kctd10	9.57779	-0.657758	0.000186172	0.00898729	312	1	870.234	1049.47	959.854	697.178	519.653	608.416
Nr2f1	8.56292	0.729172	0.000186338	0.00898729	313	1	303.314	284.14	293.727	530.134	443.68	486.907
Metrn	10.1693	-0.477262	0.000186535	0.00898729	314	1	1358.84	1358.4	1358.62	958.185	993.723	975.954
Lamb2	9.19469	-0.612591	0.000187067	0.00898729	315	1	742.291	706.853	724.572	496.493	451.278	473.885
Ccdc124	9.7863	-0.545429	0.000187394	0.00898729	316	1	1085.31	1048.2	1066.76	784.18	677.676	730.928
Tubb4a	13.999	-0.349314	0.000188088	0.00898729	317	1	18072	18887.3	18479.7	15337.9	13673.6	14505.7
Cx3cl1	14.7059	-0.37123	0.000189002	0.00898729	318	1	30035.8	30752.6	30394.2	25490.5	21506.3	23498.4
Jph3	12.0079	-0.415773	0.000189125	0.00898729	319	1	4404.11	5109.43	4756.77	3749.22	3382.3	3565.76
Gng7	15.4009	-0.351442	0.000191326	0.00906347	320	1	50894.9	46844.3	48869.6	40521	36087	38304
Csf1r	11.9087	-0.378971	0.000197708	0.00933662	321	1	4465.88	4302.78	4384.33	3213.28	3529.69	3371.49
Ints1	9.85555	-0.551687	0.000200283	0.00942886	322	1	1090.83	1152.45	1121.64	837.542	692.871	765.206
Lsm4	9.2042	-0.620498	0.000201334	0.00944896	323	1	769.865	692.869	731.367	445.452	505.978	475.715
Wdr54	9.20302	-0.674111	0.000204647	0.00957482	324	1	789.718	699.225	744.472	528.974	404.175	466.574
Bag6	12.1016	-0.379513	0.00020568	0.00959355	325	1	4800.08	5225.12	5012.6	4012.54	3693.79	3853.17
Fuom	9.37798	-0.594588	0.000207736	0.00965974	326	1	872.44	762.791	817.616	555.654	527.25	541.452
Sdhb	11.3894	-0.409415	0.000208875	0.00968299	327	1	3068.43	3114.73	3091.58	2472.02	2183.45	2327.74
Mpc1	8.14211	-0.849271	0.000213792	0.00982036	328	1	387.138	371.225	379.182	240.126	180.815	210.471
B9d2	9.06315	-0.705209	0.000213825	0.00982036	329	1	670.599	695.411	683.005	488.373	349.474	418.923
Pitpnb	12.029	-0.359205	0.000214091	0.00982036	330	1	4685.37	4780.79	4733.08	3781.7	3598.07	3689.88
Gabra1	12.9491	0.36806	0.00021443	0.00982036	331	1	6547.16	7374.28	6960.72	8671.22	9296.02	8983.62
Snap25	15.5752	0.405322	0.000222972	0.0101808	332	1	38703.9	46142.5	42423.2	60688.1	51681.2	56184.7
Clstn2	8.92522	0.877749	0.000224434	0.0102168	333	1	306.622	410.636	358.629	831.742	486.225	658.983
Prdx2	12.4336	-0.353212	0.000227123	0.0103082	334	1	6386.13	6118.86	6252.49	5062.37	4727.02	4894.7
Mid1ip1	10.9984	-0.414029	0.000229805	0.0103989	335	1	2404.45	2318.25	2361.35	1702.92	1841.58	1772.25
Flywch1	11.1808	-0.451157	0.000233608	0.0105395	336	1	2525.78	2903.06	2714.42	2126.34	1844.62	1985.48
Srebf1	9.62085	-0.564216	0.00024702	0.0111115	337	1	1019.13	895.644	957.389	606.696	688.312	647.504
Chuk	10.0835	0.474837	0.000250647	0.0112413	338	1	929.794	910.9	920.347	1257.47	1300.65	1279.06
Hras	12.0533	-0.41038	0.000252738	0.0113016	339	1	5252.29	4546.87	4899.58	3901.18	3471.95	3686.57
Ipo13	11.6375	-0.38744	0.000257082	0.0114621	340	1	3616.6	3670.93	3643.77	2939.52	2631.69	2785.6
Tubb5	13.6214	-0.375494	0.00026392	0.0117324	341	1	15119.4	13589.1	14354.2	11856.7	10273	11064.8
Ndufs8	11.0963	-0.425121	0.00026634	0.0118054	342	1	2676.88	2397.07	2536.98	1966.25	1812.71	1889.48
Pan3	10.1746	0.464648	0.000267274	0.0118082	343	1	1010.31	957.303	983.807	1358.4	1356.87	1357.63
Adprh	10.6883	-0.42584	0.000267961	0.0118082	344	1	1934.59	1890.45	1912.52	1461.64	1385.74	1423.69
Gpr37l1	12.8025	-0.330737	0.000275583	0.0121089	345	1	8114.47	7908.24	8011.35	6224.72	6515.42	6370.07
Lrrtm1	10.6014	-0.463763	0.000282756	0.0123752	346	1	1943.41	1705.47	1824.44	1381.6	1264.19	1322.89
Itgb1bp1	10.9606	-0.431117	0.000283276	0.0123752	347	1	2287.54	2340.5	2314.02	1838.65	1593.91	1716.28
Zmiz2	12.162	-0.385717	0.000284348	0.0123863	348	1	4919.2	5556.93	5238.06	4196.99	3821.43	4009.21
Vps72	9.07557	-0.605446	0.00028583	0.0124152	349	1	658.466	672.528	665.497	452.412	422.408	437.41
Atp1b1	15.1546	0.308547	0.000288337	0.0124883	350	1	31795	33758	32776.5	39922.4	41262.3	40592.4
Bex1	9.77824	-0.51272	0.000293805	0.0126889	351	1	1053.33	1044.39	1048.86	766.78	703.507	735.143
Ngef	14.1919	-0.381746	0.000295247	0.0127149	352	1	20108	22616.1	21362.1	17753.1	15038	16395.6
Sem1	10.9615	-0.402692	0.000296117	0.0127163	353	1	2233.49	2351.94	2292.72	1751.65	1716.98	1734.31
Fam227b	4.6616	2.32163	0.000300408	0.0128641	354	1	9.92663	12.7132	11.3199	41.7611	71.4143	56.5877
Nhp2	9.84735	-0.517871	0.000302084	0.0128994	355	1	1157	1047.57	1102.29	802.741	736.935	769.838
Slc25a19	9.87782	-0.527404	0.000303862	0.0129389	356	1	1045.6	1213.47	1129.54	821.301	746.052	783.676
Stk38	9.9123	0.530661	0.000309464	0.0131405	357	1	834.94	768.512	801.726	1052.15	1264.19	1158.17
Erp29	10.9018	-0.40222	0.000315249	0.0133488	358	1	2173.93	2224.81	2199.37	1689	1639.49	1664.25
Sez6l	10.7213	0.505511	0.000319025	0.0134356	359	1	1227.59	1606.31	1416.95	2002.21	2020.87	2011.54
Zfp14	8.56904	0.716723	0.000319072	0.0134356	360	1	270.225	322.279	296.252	461.692	512.056	486.874
Pnoc	5.78913	1.7974	0.000329358	0.0137878	361	1	31.9858	27.3334	29.6596	60.3216	145.868	103.095
Clpp	9.40574	-0.566893	0.000329519	0.0137878	362	1	860.308	790.76	825.534	585.815	528.77	557.293
Ssbp4	9.78134	-0.51327	0.000330164	0.0137878	363	1	1000.38	1102.23	1051.31	757.5	715.663	736.581
Cx3cr1	11.2136	0.40173	0.000331933	0.0138234	364	1	1954.44	2177.77	2066.11	2781.75	2677.28	2729.51
Efnb1	8.12477	-0.778418	0.000332842	0.0138234	365	1	357.359	373.768	365.563	218.086	208.165	213.125
Gda	12.5962	0.35616	0.000335758	0.0138929	366	1	5144.2	5801.66	5472.93	7091.26	6919.59	7005.43
Sgta	11.1985	-0.409395	0.000336347	0.0138929	367	1	2654.82	2761.94	2708.38	2171.58	1906.91	2039.25
Banf1	10.4344	-0.454399	0.000348432	0.0143529	368	1	1592.67	1646.99	1619.83	1255.15	1109.2	1182.18
Txn2	11.5283	-0.396077	0.000351861	0.0144549	369	1	3560.35	3216.44	3388.39	2695.91	2453.92	2574.91
Vps51	9.71046	-0.508348	0.000356503	0.014606	370	1	995.972	1002.43	999.203	722.699	682.235	702.467
Cox8a	10.9918	-0.4021	0.00035893	0.0146658	371	1	2240.11	2441.57	2340.84	1762.09	1780.8	1771.44
Ldb3	7.86648	0.923201	0.000361466	0.014717	372	1	207.356	131.581	169.469	323.648	319.085	321.367
Akr1a1	12.6152	-0.344399	0.000362125	0.014717	373	1	7223.28	6915.34	7069.31	5821.03	5315.05	5568.04
Jpt1	10.678	-0.430493	0.000366891	0.0148709	374	1	2002.97	1800.82	1901.9	1404.8	1417.65	1411.22
Hint1	10.8902	-0.444508	0.000370058	0.0149592	375	1	2259.96	2168.23	2214.1	1772.53	1481.47	1627
Szrd1	10.8979	-0.408743	0.000381291	0.0153723	376	1	2093.42	2303.63	2198.52	1648.4	1663.8	1656.1
Arglu1	12.1842	0.355895	0.000386358	0.0155353	377	1	4340.14	3887.69	4113.92	5281.62	5248.19	5264.9
Ndn	12.2741	-0.393428	0.000397713	0.0159496	378	1	5777.3	5576	5676.65	3905.82	4737.66	4321.74
Camkv	14.5569	-0.353377	0.00040107	0.0160417	379	1	26677.3	27807.6	27242.4	23107.8	19540.2	21324
Guf1	9.71349	0.499829	0.000409083	0.0163192	380	1	731.262	680.791	706.026	999.946	996.762	998.354
Vim	9.81699	-0.514871	0.000410288	0.0163243	381	1	1155.9	1000.53	1078.21	754.02	755.168	754.594
Ppp1r1b	15.179	-0.32505	0.000417297	0.0165597	382	1	41001.4	42038.1	41519.7	35200	31088	33144
Dpp10	10.9493	0.411605	0.000419868	0.0166182	383	1	1711.79	1716.92	1714.35	2140.26	2420.49	2280.37
Mag	13.4246	-0.304705	0.000423739	0.0167278	384	1	12067.5	12372.5	12220	9855.62	9931.15	9893.38
Aldh2	11.0425	-0.385479	0.000426707	0.0168012	385	1	2358.13	2463.18	2410.65	1858.37	1832.46	1845.41
Mir100hg	10.8275	0.476977	0.000431785	0.0169134	386	1	1673.19	1407.35	1540.27	1943.05	2344.52	2143.78
Tmem198	9.58972	-0.61096	0.000431788	0.0169134	387	1	957.368	947.132	952.25	727.339	519.653	623.496
Eif2s3y	10.3248	0.499043	0.000436871	0.0170684	388	1	956.265	1201.4	1078.83	1520.8	1528.57	1524.68
Ptpa	12.5108	-0.352717	0.000439801	0.0171387	389	1	6880.26	6309.55	6594.91	5399.94	4929.11	5164.52
Gtf3c1	11.5897	-0.378316	0.000455405	0.0177012	390	1	3327.63	3700.17	3513.9	2788.71	2618.02	2703.37
Mfsd4a	7.85128	0.909687	0.000465755	0.0180573	391	1	141.179	195.783	168.481	354.969	278.06	316.515
Prkcz	12.7498	-0.350668	0.000468157	0.0180581	392	1	7697.55	7858.02	7777.78	6514.73	5684.28	6099.5
Stub1	8.37758	-0.716874	0.000468161	0.0180581	393	1	422.433	430.341	426.387	277.247	241.593	259.42
Fgfr1op	8.66836	0.661641	0.000471902	0.0181563	394	1	313.24	333.721	323.481	477.932	545.484	511.708
Stmn3	12.5479	-0.397675	0.000481866	0.0184486	395	1	6788.71	6957.29	6873	5790.87	4643.45	5217.16
Prr7	7.76863	-0.860136	0.000481933	0.0184486	396	1	285.666	301.938	293.802	176.325	147.387	161.856
Tmem164	11.0269	-0.412323	0.00048902	0.0186727	397	1	2555.56	2258.5	2407.03	1869.97	1747.37	1808.67
Ssna1	9.52245	-0.51595	0.000495595	0.0188762	398	1	891.191	867.675	879.433	605.536	624.495	615.016
Gls	12.8943	0.342963	0.000497521	0.0189021	399	1	6525.1	6994.8	6759.95	9049.39	8098.69	8574.04
Disp2	11.6589	0.370084	0.000498878	0.0189062	400	1	2826.88	2861.74	2844.31	3463.85	3888.28	3676.07
Rundc3a	12.615	-0.388511	0.000500286	0.0189123	401	1	6940.92	7413.69	7177.31	6027.52	4938.22	5482.87
Clu	14.4459	-0.288875	0.00050178	0.0189216	402	1	24819.9	24515.5	24667.7	20247.2	20135.8	20191.5
Slc25a37	10.2716	0.434122	0.000504156	0.018964	403	1	1057.74	1069.18	1063.46	1465.12	1408.53	1436.83
Cldn5	10.1118	-0.468493	0.000508033	0.0190625	404	1	1218.77	1384.47	1301.62	945.425	935.983	940.704
Zbtb17	9.6037	-0.565699	0.00050967	0.0190767	405	1	856.999	1036.12	946.562	692.538	586.509	639.524
Fis1	12.16	-0.374405	0.000518658	0.0193633	406	1	5532.44	4888.22	5210.33	4229.47	3809.27	4019.37
Kcnc3	10.454	0.432264	0.000520605	0.0193633	407	1	1148.18	1266.87	1207.52	1654.2	1604.54	1629.37
Rcc2	11.6083	-0.412402	0.000521158	0.0193633	408	1	3634.25	3569.23	3601.74	2985.92	2426.57	2706.24
Sema3f	8.54071	-0.679589	0.000529712	0.019633	409	1	491.92	450.682	471.301	307.408	281.099	294.253
Syn1	12.6739	0.346785	0.000531494	0.019651	410	1	5426.56	6162.72	5794.64	7504.23	7234.12	7369.18
Smarcd1	12.7712	-0.38137	0.000550775	0.0202924	411	1	8243.51	7713.73	7978.62	6721.21	5529.29	6125.25
Mcm2	6.90987	-1.10515	0.000551517	0.0202924	412	1	191.915	160.822	176.368	78.882	85.0894	81.9857
Cpeb1	9.3183	0.554645	0.000558579	0.0205024	413	1	569.127	484.372	526.75	787.66	759.727	773.694
Srek1	10.8328	0.38657	0.000563866	0.0206465	414	1	1611.42	1578.98	1595.2	2104.29	2066.46	2085.38
Tet2	10.3693	0.425074	0.00056797	0.0207466	415	1	1171.34	1111.77	1141.56	1503.4	1562	1532.7
Ubb	12.1526	-0.329756	0.000576836	0.0210199	416	1	5076.92	5131.68	5104.3	4164.51	3958.18	4061.34
Ramp1	10.713	-0.426257	0.000579042	0.0210496	417	1	2073.56	1817.99	1945.77	1486	1410.05	1448.03
Nme2	9.91341	-0.532305	0.000581709	0.021096	418	1	1179.06	1140.37	1159.72	904.823	698.949	801.886
Celf4	13.3827	-0.309052	0.000598202	0.0216424	419	1	11851.3	11924.3	11887.8	9223.4	9967.62	9595.51
Pgd	10.6114	-0.421024	0.00061102	0.0220078	420	1	1817.68	1802.73	1810.2	1433.8	1270.26	1352.03
Stx3	9.76773	0.477742	0.000611206	0.0220078	421	1	744.497	732.915	738.706	1059.11	998.281	1028.69
Slf2	10.953	0.379974	0.000620214	0.0222722	422	1	1709.59	1765.86	1737.72	2307.3	2215.36	2261.33
Cdh6	9.40255	0.568533	0.000621489	0.0222722	423	1	588.98	522.512	555.746	912.944	735.416	824.18
Yif1b	8.85812	-0.716289	0.000629514	0.0224177	424	1	560.303	629.303	594.803	433.851	290.216	362.033
Aco2	13.6287	-0.327974	0.000629964	0.0224177	425	1	14470.8	13911.4	14191.1	12020.2	10590.6	11305.4
Ddx54	9.83884	-0.511959	0.000629985	0.0224177	426	1	1004.8	1182.33	1093.56	812.021	721.74	766.881
Etfb	10.1061	-0.453932	0.000640188	0.0227274	427	1	1346.71	1233.18	1289.95	953.545	929.906	941.725
Unc5d	8.911	0.617551	0.000658225	0.0232873	428	1	409.198	368.047	388.622	545.214	647.287	596.251
Fbxl16	14.7011	-0.331224	0.000659031	0.0232873	429	1	30867.4	28885.6	29876.5	25436	22059.4	23747.7
Avpi1	8.35572	-0.824894	0.000666145	0.0234839	430	1	479.787	392.202	435.994	299.288	192.971	246.129
Plxnb2	10.2179	-0.431948	0.000669156	0.0235353	431	1	1398.55	1367.94	1383.25	1002.27	1048.42	1025.34
Zfp428	9.21739	-0.565193	0.000672283	0.0235906	432	1	673.908	774.233	724.07	465.172	513.575	489.374
LOC114841036	8.68196	-0.784615	0.000684175	0.0239525	433	1	462.14	615.954	539.047	378.17	247.671	312.92
Ppfia2	10.5979	0.409098	0.000686676	0.0239692	434	1	1291.56	1398.45	1345.01	1751.65	1820.31	1785.98
Pja1	12.3721	-0.31491	0.000687816	0.0239692	435	1	5824.72	6000.62	5912.67	4739.88	4766.53	4753.2
Cmtm5	10.8761	-0.416369	0.000698531	0.0242868	436	1	2255.55	2086.87	2171.21	1503.4	1750.41	1626.9
Mapk8ip1	13.5705	-0.291435	0.000701155	0.0243222	437	1	13475.9	13440.4	13458.2	11150.2	10842.8	10996.5
Vps18	10.2165	-0.471184	0.000706482	0.0244511	438	1	1292.67	1509.06	1400.86	1068.39	952.697	1010.54
H3f3b	11.4898	-0.362392	0.000708585	0.024468	439	1	3308.88	3212.62	3260.75	2404.74	2668.16	2536.45
Rbm15b	9.23829	-0.536866	0.000715163	0.0246101	440	1	716.923	738	727.462	495.333	507.497	501.415
Ank2	13.2302	0.301983	0.000715949	0.0246101	441	1	8703.45	8604.92	8654.18	10992.4	10346	10669.2
Tial1	11.9213	0.3396	0.000719498	0.0246762	442	1	3596.75	3299.07	3447.91	4321.11	4404.9	4363
Sbf1	11.4223	-0.359013	0.00072178	0.0246986	443	1	3023.21	3192.92	3108.06	2502.18	2344.52	2423.35
Fscn1	12.0079	-0.382462	0.000728611	0.0248762	444	1	4483.53	4920.64	4702.08	3913.94	3300.25	3607.1
Abca2	12.4582	-0.312429	0.000736605	0.0250926	445	1	6387.23	6153.82	6270.53	5048.45	5050.66	5049.56
Tmem242	10.7757	-0.390265	0.000738291	0.0250936	446	1	2053.71	1960.37	2007.04	1566.04	1496.66	1531.35
Arpp21	16.1028	-0.310289	0.000752504	0.0254083	447	1	82460.5	74268.5	78364.5	65713.4	60685.5	63199.4
Tuba1a	13.3239	-0.359163	0.000752667	0.0254083	448	1	12298	10928.3	11613.1	9758.17	8349.4	9053.79
Dipk1b	9.89523	-0.483627	0.000755397	0.0254083	449	1	1158.11	1093.97	1126.04	863.062	747.571	805.317
Celsr1	7.25236	-0.985901	0.000755891	0.0254083	450	1	232.724	196.419	214.571	95.1225	121.556	108.339
Psma7	10.888	-0.402768	0.000755929	0.0254083	451	1	2308.49	2049.37	2178.93	1694.8	1601.5	1648.15
Prdm8	5.47315	1.91271	0.000778901	0.0261225	452	1	16.5444	29.2403	22.8924	125.283	47.1031	86.1932
Ap5s1	8.67862	0.668944	0.000784408	0.0262491	453	1	318.755	331.179	324.967	588.135	445.2	516.668
Mcm6	7.31175	-1.05142	0.000793132	0.0264566	454	1	268.019	189.426	228.723	87.0023	133.712	110.357
Zcchc14	11.4753	-0.36783	0.000794098	0.0264566	455	1	3306.67	3161.77	3234.22	2652.99	2359.71	2506.35
Impact	13.0379	0.342058	0.000804515	0.0267448	456	1	7307.1	7633	7470.05	8741.99	10195.5	9468.76
Chmp1a	10.6901	-0.405069	0.00082214	0.0272709	457	1	1946.72	1855.49	1901.11	1511.52	1359.91	1435.72
Nemf	10.4304	0.428319	0.000833263	0.0275796	458	1	1112.89	1266.23	1189.56	1574.16	1627.33	1600.75
Pcdhgc3	10.6732	-0.478598	0.000846141	0.0278997	459	1	1659.95	2194.93	1927.44	1423.36	1343.2	1383.28
Pdcd4	10.704	0.39483	0.000846616	0.0278997	460	1	1402.96	1506.51	1454.74	1968.57	1856.77	1912.67
Fahd2a	8.42054	-0.675775	0.000865988	0.0284762	461	1	459.934	406.186	433.06	265.647	276.541	271.094
Rpl37	11.1197	-0.494017	0.000874387	0.0286901	462	1	3092.7	2188.58	2640.64	1893.17	1856.77	1874.97
Gnl1	12.4494	-0.33578	0.000877899	0.0287431	463	1	6285.76	6280.95	6283.36	5300.18	4657.13	4978.65
St3gal2	11.7419	-0.337317	0.000882006	0.0288154	464	1	3836.09	3863.54	3849.81	3158.76	2935.58	3047.17
Zfp106	12.6144	-0.302411	0.000888254	0.0289571	465	1	7050.11	6876.56	6963.34	5677.19	5615.9	5646.54
Gjb6	10.157	0.583013	0.000903091	0.0293776	466	1	828.322	1037.4	932.859	1150.75	1644.05	1397.4
Scaf1	10.9285	-0.470434	0.000918347	0.0298099	467	1	1995.25	2592.85	2294.05	1778.33	1533.13	1655.73
Nek1	10.2487	0.445554	0.000958646	0.0310265	468	1	981.633	1103.5	1042.57	1344.47	1495.14	1419.81
Camk2g	11.0141	0.429533	0.000959919	0.0310265	469	1	1798.93	1765.23	1782.08	2686.63	2113.56	2400.09
Clk1	12.0876	0.370827	0.000965204	0.0311309	470	1	3901.16	3753.57	3827.37	5421.98	4476.31	4949.15
Zfp811	8.51751	0.662962	0.000970495	0.0311496	471	1	273.534	308.93	291.232	426.891	495.342	461.116
Necab2	11.7334	-0.332165	0.00097336	0.0311496	472	1	3786.46	3854	3820.23	2936.04	3133.11	3034.57
Pgr15l	1.8215	5.36025	0.000973668	0.0311496	473	1	1.10296	0	0.551479	5.80015	39.5058	22.653
Ost4	9.16255	-0.534378	0.000974003	0.0311496	474	1	675.011	704.311	689.661	476.772	475.589	476.181
Syndig1l	13.3527	-0.328486	0.000980567	0.0312461	475	1	12073	11371.3	11722.1	9986.7	8683.68	9335.19
Bcl9l	10.0528	-0.460211	0.000981141	0.0312461	476	1	1162.52	1329.16	1245.84	946.585	864.569	905.577
Scamp4	10.2217	-0.437249	0.000987857	0.031394	477	1	1379.8	1399.09	1389.44	1095.07	957.256	1026.16
Cox6a1	11.2418	-0.350369	0.00100017	0.0317188	478	1	2783.87	2685.03	2734.45	2107.77	2181.94	2144.85
Mrps28	7.4167	-0.910608	0.00100466	0.0317946	479	1	253.68	214.853	234.267	132.243	116.998	124.621
Tubb4b	11.1624	-0.40254	0.00101684	0.0321132	480	1	2398.93	2871.27	2635.1	2069.49	1917.55	1993.52
Atp6v0b	12.3108	-0.351791	0.00101924	0.0321218	481	1	5836.86	5642.11	5739.48	4865.17	4129.87	4497.52
Sptb	12.2814	-0.32153	0.00102965	0.0323827	482	1	5606.34	5523.88	5565.11	4655.2	4251.43	4453.32
Samm50	11.4399	-0.33657	0.00104283	0.0327293	483	1	3103.73	3140.16	3121.94	2499.86	2444.8	2472.33
Ubqln4	12.2339	-0.316377	0.00104888	0.0328217	484	1	5419.94	5330.64	5375.29	4467.28	4166.34	4316.81
Selplg	9.50667	-0.512412	0.0010501	0.0328217	485	1	888.985	848.605	868.795	555.654	662.482	609.068
Tmem145	7.36786	1.01132	0.00105503	0.0329078	486	1	108.09	124.589	116.34	295.808	173.218	234.513
Rian	13.2424	0.402576	0.00105738	0.0329134	487	1	9209.7	7648.25	8428.98	12398.4	9885.56	11142
Zfp445	12.3989	0.310002	0.00106289	0.032985	488	1	4950.08	4750.92	4850.5	6184.12	5842.3	6013.21
Cdk14	10.9337	0.431332	0.00106492	0.032985	489	1	1491.2	1877.74	1684.47	2315.42	2227.52	2271.47
Fcgr2b	6.45521	-1.21684	0.00106621	0.032985	490	1	137.87	129.675	133.772	64.9617	50.142	57.5518
Ppp1r37	10.8543	-0.367027	0.00106983	0.0330296	491	1	2116.58	2088.14	2102.36	1610.12	1650.13	1630.12
Calm3	15.171	-0.332479	0.0010824	0.0332861	492	1	39460.5	43334.2	41397.4	35567.7	30185.5	32876.6
Scap	10.8287	-0.376432	0.00108253	0.0332861	493	1	2032.75	2111.66	2072.21	1651.88	1540.73	1596.3
1700047M11Rik	8.33728	0.667399	0.00109144	0.0334922	494	1	243.754	269.52	256.637	409.491	405.694	407.592
Notch1	8.47868	-0.663424	0.0010956	0.0335518	495	1	405.889	492	448.945	288.847	278.06	283.454
Dctpp1	8.6697	-0.678704	0.00111813	0.0341728	496	1	570.23	460.217	515.223	359.609	284.138	321.874
Nrxn1	12.8383	0.308792	0.0011212	0.0341976	497	1	6844.96	6315.28	6580.12	7918.37	8382.83	8150.6
Rhog	9.6506	-0.473	0.00113356	0.0344862	498	1	977.221	916.621	946.921	667.017	697.429	682.223
Pde1b	15.3544	-0.326527	0.00113521	0.0344862	499	1	48550	45270.4	46910.2	40528	34289.5	37408.7
Rap1gap	13.066	-0.322361	0.00114174	0.0346153	500	1	9615.59	9562.22	9588.91	8208.37	7129.28	7668.82
Park7	11.5258	-0.367224	0.00114803	0.0347364	501	1	3420.27	3277.46	3348.87	2793.35	2399.22	2596.28
Tppp3	9.63362	-0.551634	0.00116266	0.035109	502	1	866.925	1056.47	961.696	570.735	741.493	656.114
Gabrd	11.7637	-0.339607	0.00116514	0.035114	503	1	4104.11	3718.61	3911.36	3150.64	3031.31	3090.98
Mrpl11	10.1706	-0.472603	0.00116832	0.0351401	504	1	1454.8	1260.51	1357.66	1064.91	891.919	978.413
Rgs4	15.2062	0.315881	0.00117104	0.0351522	505	1	32279.2	35486.3	33882.8	44934.9	39417.7	42176.3
Smim12	9.59428	-0.479464	0.0011752	0.0352071	506	1	913.25	912.171	912.71	683.258	626.015	654.636
Elavl4	10.1313	0.478303	0.00118213	0.0353449	507	1	854.793	1045.66	950.226	1243.55	1403.98	1323.76
Aamp	11.9295	-0.348809	0.00119212	0.0355735	508	1	4433.89	4370.16	4402.03	3713.26	3199.97	3456.61
Scand1	7.19823	-0.955922	0.00119619	0.0356248	509	1	201.841	207.225	204.533	89.3223	121.556	105.439
Otub1	12.7305	-0.345993	0.00119892	0.035636	510	1	8129.91	7193.76	7661.83	6426.57	5629.58	6028.07
Wsb1	10.9791	0.39341	0.00120289	0.0356843	511	1	1900.4	1622.2	1761.3	2230.74	2396.18	2313.46
Grhpr	9.03003	-0.551196	0.00120657	0.0357235	512	1	628.686	636.931	632.809	404.85	458.875	431.863
Clk4	10.9973	0.355565	0.001211	0.0357848	513	1	1840.84	1773.49	1807.16	2351.38	2273.1	2312.24
Fndc9	9.16071	-0.555693	0.00122488	0.0361244	514	1	690.452	697.318	693.885	419.931	524.211	472.071
Nisch	12.9107	-0.317531	0.00122796	0.036141	515	1	8070.35	9121.71	8596.03	7035.58	6760.05	6897.82
Fgf12	12.2655	0.310504	0.00123307	0.036141	516	1	4361.1	4481.4	4421.25	5305.98	5659.96	5482.97
Alad	9.59208	-0.58246	0.00123496	0.036141	517	1	926.485	962.388	944.437	749.379	512.056	630.718
Dusp11	11.4229	0.331123	0.0012351	0.036141	518	1	2439.74	2456.19	2447.97	3057.84	3101.2	3079.52
Myo18a	12.119	-0.326172	0.00123736	0.036141	519	1	4943.46	5017.89	4980.68	4186.55	3759.13	3972.84
Acsl3	12.4858	0.362129	0.00124125	0.0361849	520	1	4793.46	5324.92	5059.19	5927.75	7077.61	6502.68
Atp6v1g1	9.55176	-0.49174	0.00126771	0.0368852	521	1	877.955	902.001	889.978	676.298	589.548	632.923
Prkab2	10.2076	0.416091	0.00128437	0.0372984	522	1	1016.93	1030.4	1023.67	1432.64	1299.13	1365.88
Snrpa	9.04509	-0.5527	0.00128745	0.0373164	523	1	595.598	683.969	639.784	440.811	431.525	436.168
Traip	10.1479	0.450934	0.00131118	0.0379318	524	1	1040.09	900.729	970.41	1422.2	1230.76	1326.48
Atp11b	10.5482	0.406317	0.00131699	0.0379825	525	1	1272.81	1328.53	1300.67	1849.09	1598.47	1723.78
Entr1	10.5985	0.388875	0.00131795	0.0379825	526	1	1415.1	1294.84	1354.97	1832.85	1715.46	1774.16
Chchd10	10.9055	-0.372738	0.00132717	0.0381756	527	1	2264.37	2100.85	2182.61	1619.4	1751.93	1685.67
Agap3	11.6038	-0.38816	0.00133427	0.0383072	528	1	3354.1	3766.92	3560.51	2976.64	2464.55	2720.6
Gria3	12.4169	0.315223	0.00137335	0.0393404	529	1	4841.99	4963.23	4902.61	6424.25	5775.44	6099.84
Tesk1	10.5901	-0.380052	0.00137563	0.0393404	530	1	1804.44	1712.47	1758.45	1340.99	1361.43	1351.21
Trhde	8.2662	0.718748	0.00137804	0.0393404	531	1	216.18	263.799	239.989	441.971	347.955	394.963
Ypel4	8.03138	0.793157	0.00139157	0.0395774	532	1	161.032	236.465	198.749	351.489	337.319	344.404
Slc39a7	11.7706	-0.363268	0.00139178	0.0395774	533	1	3991.61	3933.46	3962.53	3360.61	2800.35	3080.48
Neat1	12.1183	0.33141	0.00139445	0.0395774	534	1	4222.13	3705.26	3963.69	5072.81	4901.76	4987.28
Mgat1	10.6418	-0.39909	0.00139919	0.0395774	535	1	1834.22	1835.15	1834.68	1494.12	1288.5	1391.31
Stmn2	12.3702	0.342695	0.0013994	0.0395774	536	1	4502.28	4900.3	4701.29	6408.01	5515.62	5961.81
Glt8d1	9.5727	0.481268	0.001403	0.0396053	537	1	641.922	647.101	644.512	842.182	957.256	899.719
Psme4	10.491	0.403202	0.0014369	0.0404868	538	1	1325.76	1177.24	1251.5	1591.56	1718.5	1655.03
Nol6	11.7525	-0.351247	0.0014496	0.040769	539	1	3737.93	4056.14	3897.03	3260.84	2848.98	3054.91
Egr4	8.02965	-0.758212	0.00147209	0.0412312	540	1	294.49	385.21	339.85	213.446	188.412	200.929
Ppp1r16a	10.0353	-0.502362	0.00147346	0.0412312	541	1	1209.95	1287.85	1248.9	1012.71	750.61	881.658
Tmem200a	6.32232	1.30452	0.0014742	0.0412312	542	1	40.8095	61.0233	50.9164	154.284	97.245	125.765
Efr3a	10.2158	0.443736	0.00148062	0.0413346	543	1	923.176	1116.22	1019.7	1404.8	1369.03	1386.91
H2aw	8.65354	-0.601628	0.00148698	0.0413909	544	1	463.243	528.869	496.056	327.128	326.683	326.905
Abcb9	10.4447	-0.443755	0.0014881	0.0413909	545	1	1590.47	1660.34	1625.4	1334.03	1056.02	1195.03
Fam20c	10.0528	-0.450163	0.00151826	0.0421078	546	1	1152.59	1330.43	1241.51	960.505	856.972	908.738
Tmem196	8.30319	0.670917	0.00151943	0.0421078	547	1	230.518	270.155	250.337	418.771	378.344	398.557
Clec18a	3.53903	2.78298	0.00154356	0.0426927	548	1	4.41183	4.44962	4.43072	33.6409	27.3502	30.4955
1700003E16Rik	8.27987	-0.666497	0.00154616	0.0426927	549	1	408.095	375.039	391.567	256.367	237.035	246.701
Slit2	8.47211	0.6333	0.00155334	0.042813	550	1	307.725	262.527	285.126	421.091	463.433	442.262
Slc2a1	11.5478	-0.351405	0.0015716	0.0432162	551	1	3351.89	3411.58	3381.74	2844.39	2456.96	2650.68
Zmym6	9.79341	0.437402	0.00157368	0.0432162	552	1	777.586	747.535	762.561	1053.31	1011.96	1032.63
Ncoa5	10.6245	-0.39068	0.00157897	0.0432372	553	1	1702.97	1912.06	1807.52	1423.36	1334.08	1378.72
Lrrfip1	9.96785	0.424578	0.00158374	0.0432372	554	1	838.249	890.559	864.404	1151.91	1168.46	1160.18
Tubb3	12.8896	-0.340932	0.00158539	0.0432372	555	1	9153.45	7927.31	8540.38	7172.47	6313.33	6742.9
Hcfc1r1	10.6978	-0.382102	0.00158585	0.0432372	556	1	1915.84	1876.47	1896.15	1539.36	1370.55	1454.95
1810037I17Rik	10.2153	-0.410513	0.00160112	0.0435752	557	1	1364.36	1376.84	1370.6	1082.31	980.048	1031.18
Eno1	10.8136	-0.482272	0.00161114	0.0437694	558	1	1791.2	2463.18	2127.19	1646.08	1399.42	1522.75
Mtln	8.89961	-0.560702	0.00162886	0.0441715	559	1	579.053	580.993	580.023	418.771	367.708	393.239
Rxrg	11.7598	-0.336373	0.00166072	0.0448069	560	1	3981.68	3811.41	3896.55	3274.76	2897.6	3086.18
Kcnh3	11.0656	-0.431998	0.00166126	0.0448069	561	1	2275.4	2703.46	2489.43	2055.57	1634.93	1845.25
Pold2	7.77404	-0.756033	0.00166137	0.0448069	562	1	279.049	289.861	284.455	168.204	168.659	168.432
Mlf2	12.8963	-0.292759	0.00166411	0.0448069	563	1	8621.83	8254.04	8437.93	7131.86	6644.57	6888.22
Ppdpf	7.5414	-0.855319	0.0016894	0.045407	564	1	269.122	232.016	250.569	155.444	121.556	138.5
Ecsit	10.2248	-0.415598	0.00170909	0.0458552	565	1	1385.32	1378.75	1382.03	1104.35	967.892	1036.12
Sgpp2	10.249	0.435455	0.00171543	0.0459439	566	1	1122.81	970.016	1046.41	1521.96	1308.25	1415.1
Fmn1	7.3479	0.898617	0.00172183	0.046034	567	1	119.12	119.504	119.312	261.007	183.854	222.43
Usp54	10.7214	0.374576	0.00172498	0.0460369	568	1	1430.54	1535.12	1482.83	1846.77	1998.08	1922.42
Phyhip	14.1252	-0.3598	0.00178886	0.047658	569	1	18721.6	21763.7	20242.7	17436.4	14112.7	15774.5
Tkt	11.8727	-0.343284	0.00180653	0.0480441	570	1	4528.75	3918.84	4223.79	3436.01	3222.76	3329.39
Rbm25	12.3882	0.294403	0.00181599	0.0482112	571	1	4696.4	4984.84	4840.62	5919.63	5953.22	5936.43
Epha5	9.83526	0.47338	0.0018392	0.0486548	572	1	740.085	810.466	775.275	972.105	1180.62	1076.36
Abhd11os	9.14772	-0.578514	0.00184375	0.0486548	573	1	662.878	723.38	693.129	534.774	393.538	464.156
Rab5c	11.8329	-0.331635	0.00184552	0.0486548	574	1	4260.73	3923.93	4092.33	3416.29	3087.53	3251.91
Asphd1	10.4287	-0.377684	0.00184554	0.0486548	575	1	1577.23	1564.99	1571.11	1222.67	1195.81	1209.24
Eif3h	10.985	-0.354474	0.00185521	0.0487741	576	1	2375.77	2207.64	2291.71	1842.13	1742.81	1792.47
Firre	10.3908	0.3783	0.0018565	0.0487741	577	1	1169.14	1186.14	1177.64	1535.88	1525.53	1530.71
Calr	14.3366	-0.310742	0.00189186	0.0496172	578	1	21820.9	24263.1	23042	17319.2	19834.9	18577.1
Ndufa6	9.91722	-0.424346	0.00189872	0.049711	579	1	1157	1083.16	1120.08	830.582	838.738	834.66
Lcn2	4.65271	-2.22922	0.0019133	0.049923	580	1	65.0746	43.8605	54.4675	3.48009	19.7529	11.6165
Plec	11.2978	-0.362193	0.0019134	0.049923	581	1	3029.83	2678.67	2854.25	2335.14	2105.96	2220.55
Slc30a10	9.76437	0.450635	0.00192703	0.0501404	582	1	800.748	687.148	743.948	1013.87	1019.55	1016.71
Ackr1	10.0135	0.411324	0.00192964	0.0501404	583	1	928.691	863.861	896.276	1201.79	1182.13	1191.96
Bad	9.46016	-0.506133	0.00193166	0.0501404	584	1	886.779	792.032	839.405	642.657	539.406	591.031
Ubxn6	10.5474	-0.392662	0.00196236	0.0508502	585	1	1731.64	1697.85	1714.75	1401.32	1211	1306.16
Zfp760	8.63184	0.582358	0.00196689	0.0508806	586	1	316.549	331.814	324.182	466.332	504.459	485.395
Fam210b	10.5054	-0.431889	0.00199601	0.051546	587	1	1878.34	1498.25	1688.29	1278.35	1224.68	1251.52
S100b	12.1565	0.310381	0.00200348	0.051651	588	1	4300.44	3899.13	4099.78	5214.34	4953.42	5083.88
Osbpl6	10.5283	0.373385	0.00201057	0.051665	589	1	1250.76	1344.42	1297.59	1679.72	1682.04	1680.88
Tmem65	10.956	0.339508	0.00201084	0.051665	590	1	1760.32	1771.58	1765.95	2215.66	2253.35	2234.5
Psph	9.42488	-0.476424	0.0020222	0.0518689	591	1	845.969	775.504	810.737	583.495	581.951	582.723
Sh3gl2	11.7337	0.371884	0.00203247	0.0520442	592	1	2705.56	3281.91	2993.73	4093.75	3654.29	3874.02
Asna1	11.0923	-0.365359	0.00204686	0.0522589	593	1	2578.72	2377.37	2478.04	2049.77	1797.51	1923.64
Ccdc85c	11.5056	-0.335925	0.00204775	0.0522589	594	1	3091.59	3441.46	3266.53	2498.7	2677.28	2587.99
Npy1r	8.67933	0.623525	0.00205647	0.0523933	595	1	319.858	340.713	330.286	584.655	433.044	508.85
4933434E20Rik	10.5031	-0.375878	0.00206088	0.0524177	596	1	1618.04	1688.31	1653.18	1221.51	1326.48	1274
Gabrb2	12.7917	0.302277	0.00210374	0.0532651	597	1	6312.23	6458.93	6385.58	7394.03	8353.96	7873.99
Mapk3	11.6974	-0.307663	0.00210784	0.0532651	598	1	3640.87	3748.48	3694.67	2926.76	3043.47	2985.11
Rtl8c	12.2057	-0.315758	0.00210808	0.0532651	599	1	5521.41	5018.53	5269.97	4408.11	4059.98	4234.05
Ndufb5	11.3287	-0.336971	0.00210825	0.0532651	600	1	2989.02	2792.45	2890.73	2190.14	2387.06	2288.6
Gap43	13.3045	-0.33352	0.00211258	0.0532854	601	1	12453.5	10259.5	11356.5	8695.59	9329.44	9012.52
Clec2d	9.01841	0.548152	0.00213951	0.0538752	602	1	477.581	380.124	428.853	615.976	638.17	627.073
Ybx1	11.1997	-0.327529	0.00214928	0.0540313	603	1	2622.84	2646.89	2634.86	2050.93	2148.51	2099.72
Lrrn2	10.9134	-0.35499	0.00215639	0.0541203	604	1	2221.36	2140.9	2181.13	1786.45	1624.3	1705.37
Spns1	10.3382	-0.405	0.00216831	0.0543295	605	1	1479.07	1500.16	1489.61	1212.23	1037.79	1125.01
Map3k11	8.81693	-0.623321	0.00217452	0.0543952	606	1	474.272	645.194	559.733	390.93	335.799	363.365
Mrpl28	9.49126	-0.457972	0.00218229	0.0544997	607	1	858.102	828.9	843.501	606.696	621.457	614.076
Snrk	9.99506	-0.418774	0.00219164	0.0546433	608	1	1122.81	1236.99	1179.9	908.304	856.972	882.638
Psmb1	11.7102	-0.326911	0.00219994	0.05476	609	1	3914.4	3590.84	3752.62	3119.32	2864.17	2991.75
Gpx4	9.37161	-0.473495	0.00222654	0.0552874	610	1	787.512	773.597	780.555	578.855	545.484	562.169
Pcx	10.9946	-0.346421	0.00222842	0.0552874	611	1	2250.04	2351.3	2300.67	1883.89	1735.22	1809.55
Ankrd29	8.80857	0.563931	0.00223342	0.0553208	612	1	386.036	351.52	368.778	502.293	588.029	545.161
Vwa1	9.43507	-0.522123	0.00226104	0.0559137	613	1	745.6	913.442	829.521	631.056	524.211	577.634
Josd2	9.473	-0.486506	0.00228315	0.0563121	614	1	772.071	910.264	841.168	626.416	574.353	600.385
Ncaph2	11.2437	-0.348039	0.00228458	0.0563121	615	1	2775.04	2696.47	2735.76	2294.54	2004.16	2149.35
Tmem143	9.45553	-0.487512	0.00230751	0.056785	616	1	805.16	857.504	831.332	644.977	540.925	592.951
Rpl14-ps1	9.04228	-0.53639	0.00231563	0.0568522	617	1	688.246	581.628	634.937	430.371	445.2	437.786
Tpgs1	7.87824	-0.740356	0.00231774	0.0568522	618	1	292.284	315.923	304.103	203.005	161.062	182.034
P4hb	11.9457	-0.306113	0.00235368	0.0576405	619	1	4397.5	4374.61	4386.05	3705.14	3389.9	3547.52
Tnrc18	10.286	-0.404866	0.00237934	0.0581749	620	1	1353.33	1519.86	1436.6	1141.47	1028.67	1085.07
Slc25a46	11.4169	0.354227	0.00240149	0.0586218	621	1	2233.49	2603.02	2418.26	2967.36	3215.16	3091.26
Atox1	10.0713	-0.406892	0.00242479	0.0590431	622	1	1183.47	1294.2	1238.84	961.665	907.114	934.389
Bloc1s1	10.0477	-0.416236	0.00242654	0.0590431	623	1	1294.87	1150.54	1222.71	931.504	901.036	916.27
Map2k2	9.78546	-0.443547	0.00244627	0.0592953	624	1	1090.83	967.474	1029.15	784.18	729.338	756.759
Babam1	10.5321	-0.394808	0.00244842	0.0592953	625	1	1669.88	1725.82	1697.85	1403.64	1179.1	1291.37
Ppp3cc	8.17996	0.640416	0.00244863	0.0592953	626	1	233.827	230.744	232.286	374.69	349.474	362.082
Sphk2	8.82747	-0.560397	0.002484	0.0600245	627	1	500.743	602.605	551.674	380.49	367.708	374.099
Cnp	14.4418	-0.301668	0.00248667	0.0600245	628	1	23248.2	26165.6	24706.9	18804.1	21286	20045.1
Slc2a4rg-ps	8.43061	0.594531	0.00249787	0.0601237	629	1	281.254	280.326	280.79	416.451	431.525	423.988
Tshz1	10.6693	-0.370523	0.00249871	0.0601237	630	1	1828.71	1874.56	1851.63	1332.87	1531.61	1432.24
Thap3	8.02987	-0.712794	0.00251176	0.0602204	631	1	371.697	297.489	334.593	212.286	196.01	204.148
Hdhd3	7.80236	-0.772788	0.00251289	0.0602204	632	1	274.637	308.93	291.784	197.205	144.348	170.777
Gng10	10.6893	-0.356094	0.00251464	0.0602204	633	1	1897.09	1838.96	1868.03	1402.48	1516.41	1459.45
Tmc7	8.93745	0.52297	0.00252768	0.0604371	634	1	400.374	417.628	409.001	566.095	609.301	587.698
Selenoh	7.32263	-0.841595	0.0025371	0.0605107	635	1	223.901	204.682	214.291	120.643	118.517	119.58
Mrpl54	8.10206	-0.704379	0.00253874	0.0605107	636	1	368.388	333.085	350.737	243.606	186.893	215.25
Drap1	11.6382	-0.30268	0.00254274	0.0605107	637	1	3526.16	3553.97	3540.06	2914	2826.18	2870.09
Mtch1	13.6274	-0.300724	0.00255436	0.060692	638	1	15111.6	12978.3	14044.9	11615.4	11189.3	11402.3
Npdc1	10.544	-0.365879	0.00256239	0.0607877	639	1	1709.59	1680.05	1694.82	1367.68	1262.67	1315.17
Tmem205	9.65694	-0.476255	0.00257141	0.0609062	640	1	1033.47	870.853	952.163	726.179	642.729	684.454
Slc25a27	10.2811	0.37428	0.00260032	0.0614202	641	1	1096.34	1089.52	1092.93	1438.44	1394.86	1416.65
Crocc	9.77482	-0.528373	0.00260121	0.0614202	642	1	861.411	1242.71	1052.06	700.658	758.207	729.433
Ubap1l	6.1303	1.2656	0.0026078	0.0614799	643	1	45.2213	45.1318	45.1766	83.5222	133.712	108.617
Wrap73	8.99501	-0.531093	0.00261762	0.0616158	644	1	646.334	580.357	613.345	447.772	401.136	424.454
Fmn2	10.5656	0.36814	0.00263892	0.0620208	645	1	1273.92	1394	1333.96	1680.88	1762.57	1721.72
Pabpc1	11.6841	-0.298005	0.00265344	0.0622656	646	1	3645.28	3651.86	3648.57	2951.12	2984.21	2967.66
9330159F19Rik	11.8263	0.301437	0.00267097	0.0625799	647	1	3173.21	3368.99	3271.1	3956.86	4105.56	4031.21
Gabrq	5.71856	1.75712	0.00268491	0.0628095	648	1	28.6769	28.6047	28.6408	37.121	156.504	96.8123
Tln2	12.181	-0.317506	0.00269511	0.0629511	649	1	5481.7	4885.68	5183.69	4353.59	3965.77	4159.68
Ypel5	11.8548	0.298503	0.00270288	0.0630353	650	1	3396.01	3283.82	3339.91	3988.18	4227.12	4107.65
Cacng7	10.6171	0.386107	0.0027202	0.0633417	651	1	1333.48	1414.34	1373.91	1950.01	1641.01	1795.51
Nktr	11.0181	0.335282	0.00272583	0.0633755	652	1	1843.04	1849.77	1846.41	2431.42	2227.52	2329.47
Rabl2	8.27668	0.623855	0.00273713	0.0635246	653	1	258.092	241.551	249.821	364.249	405.694	384.972
Hsf2	9.818	0.420743	0.00274062	0.0635246	654	1	805.16	755.163	780.162	1002.27	1086.41	1044.34
Plk5	7.99408	-0.687079	0.00274888	0.0636188	655	1	308.828	338.171	323.5	213.446	188.412	200.929
Adra2a	7.31477	0.833934	0.00278172	0.0642807	656	1	115.811	122.682	119.246	197.205	227.918	212.562
Eml5	11.332	0.312604	0.00279505	0.0643351	657	1	2360.33	2266.13	2313.23	2910.52	2835.3	2872.91
Bmyc	8.06505	-0.673626	0.00279748	0.0643351	658	1	319.858	356.605	338.231	225.046	199.048	212.047
Gpr52	12.5865	-0.284208	0.0027981	0.0643351	659	1	6503.04	7071.71	6787.38	5627.31	5520.17	5573.74
Tceal5	11.5423	0.321827	0.00280105	0.0643351	660	1	2533.5	2801.99	2667.74	3427.89	3240.99	3334.44
Cd38	7.97391	0.827234	0.00281433	0.0645423	661	1	196.327	181.163	188.745	241.286	428.486	334.886
Mt2	11.9085	-0.31842	0.00282894	0.0647793	662	1	4016.98	4568.48	4292.73	3539.25	3345.84	3442.54
Alas2	7.67764	-0.743841	0.00285698	0.0650493	663	1	251.475	278.419	264.947	150.804	165.62	158.212
Grin2a	12.2356	0.310328	0.00285821	0.0650493	664	1	4173.6	4488.39	4330.99	5699.23	5041.55	5370.39
4930413G21Rik	5.35728	-1.61307	0.00285879	0.0650493	665	1	68.3834	75.0078	71.6956	30.1608	16.714	23.4374
A2ml1	6.57822	1.03663	0.00286535	0.0650493	666	1	62.8686	70.5582	66.7134	141.524	132.192	136.858
Ntrk1	7.5394	-0.778553	0.00286546	0.0650493	667	1	251.475	235.83	243.652	147.324	136.751	142.037
Fstl1	10.3209	0.378929	0.00286648	0.0650493	668	1	1165.83	1077.44	1121.63	1408.28	1508.82	1458.55
Appl2	10.3257	0.384556	0.002872	0.0650772	669	1	1191.2	1055.19	1123.19	1510.36	1422.21	1466.28
Crtc1	12.3776	-0.29851	0.00288786	0.0653389	670	1	6000.09	5802.93	5901.51	5070.49	4526.45	4798.47
Rtn2	10.5458	-0.402063	0.0028963	0.0654323	671	1	1888.27	1548.47	1718.37	1266.75	1334.08	1300.42
Slc4a3	11.6106	-0.333868	0.00292187	0.0659116	672	1	3381.67	3639.79	3510.73	2984.76	2586.11	2785.43
Per3	9.85944	0.429156	0.00294568	0.0663277	673	1	866.925	734.187	800.556	1104.35	1051.46	1077.91
Lgals8	9.40306	0.452527	0.00294906	0.0663277	674	1	579.053	578.45	578.752	772.58	811.388	791.984
Sptbn2	13.9875	-0.348361	0.00295735	0.0664156	675	1	19396.6	17256.2	18326.4	16131.4	12658.6	14395
Timm8b	11.3734	-0.320554	0.00296246	0.066432	676	1	3093.8	2835.68	2964.74	2403.58	2344.52	2374.05
Rps2	8.79157	-0.553528	0.00300046	0.0670878	677	1	570.23	503.442	536.836	341.049	390.5	365.774
Selenow	14.7573	-0.345179	0.00300056	0.0670878	678	1	33965.6	28463.6	31214.6	27080.9	22064	24572.4
Atp1a3	15.8185	-0.270333	0.00300778	0.06715	679	1	59886.2	67046.2	63466.2	53949.5	51293.7	52621.6
Thoc1	9.88538	0.413039	0.00303934	0.0677548	680	1	787.512	851.784	819.648	1056.79	1125.92	1091.35
Dnajc15	9.20595	-0.474801	0.00306192	0.068158	681	1	689.349	703.039	696.194	508.093	493.822	500.958
Dner	11.3675	0.345009	0.00307494	0.068235	682	1	2280.92	2407.88	2344.4	2738.83	3216.68	2977.76
Col11a1	7.74982	0.7388	0.00307604	0.068235	683	1	148.899	184.341	166.62	279.567	276.541	278.054
Stxbp2	8.83317	0.584001	0.00307888	0.068235	684	1	366.182	378.853	372.518	647.297	469.511	558.404
Tafa5	11.1154	-0.324454	0.00308645	0.0683029	685	1	2553.35	2411.69	2482.52	1944.21	2020.87	1982.54
Pfdn5	12.5176	-0.308964	0.00310345	0.0684766	686	1	6956.36	6096.61	6526.48	5043.81	5492.82	5268.32
Crebzf	10.4917	0.402565	0.00310611	0.0684766	687	1	1218.77	1285.94	1252.35	1486	1824.86	1655.43
Arhgap33	12.9284	-0.312875	0.00310785	0.0684766	688	1	8168.51	9207.53	8688.02	7472.91	6515.42	6994.17
Ttbk1	10.6485	-0.374598	0.00312723	0.0687394	689	1	1712.89	1942.57	1827.73	1325.91	1493.62	1409.77
Mrps18a	9.99754	-0.417005	0.00312885	0.0687394	690	1	1263.99	1098.42	1181.2	904.823	864.569	884.696
Snhg6	8.08249	-0.666672	0.00313689	0.0688164	691	1	368.388	314.651	341.52	209.965	220.321	215.143
Hars2	9.57974	0.435836	0.00317446	0.0693969	692	1	640.819	675.07	657.945	924.544	855.452	889.998
Qrfpr	4.12967	2.2087	0.00317471	0.0693969	693	1	9.92663	6.35659	8.14161	46.4012	28.8696	37.6354
9430015G10Rik	8.85424	0.524865	0.00317708	0.0693969	694	1	412.507	359.148	385.827	555.654	554.601	555.127
Phf20l1	10.3975	0.360674	0.00322406	0.0702229	695	1	1227.59	1153.09	1190.34	1535.88	1520.97	1528.43
Kcnab2	13.072	-0.371126	0.00322417	0.0702229	696	1	9492.06	10094.9	9793.48	8700.23	6444	7572.11
Lrrc24	8.81652	-0.537553	0.0032526	0.0707406	697	1	516.185	570.186	543.186	394.41	354.033	374.221
Pkm	14.26	-0.268215	0.00326478	0.0709037	698	1	21656.6	21403.9	21530.3	18848.2	16907	17877.6
Ccnl1	10.0259	0.385839	0.00327815	0.0709928	699	1	922.073	902.001	912.037	1213.39	1169.98	1191.69
Vat1l	12.6504	-0.309296	0.00327825	0.0709928	700	1	7744.98	6568.27	7156.62	5736.35	5814.95	5775.65
Apbb1	12.8038	-0.340265	0.00330191	0.0714031	701	1	7732.84	8358.28	8045.56	7076.18	5634.13	6355.16
Rtl6	11.3615	-0.346637	0.00331268	0.0715341	702	1	2858.87	3075.32	2967.09	2528.87	2137.87	2333.37
Dnajc21	8.50562	0.58842	0.003319	0.0715685	703	1	272.431	320.372	296.402	462.852	428.486	445.669
Rbm14	9.00886	-0.496712	0.00332874	0.0716541	704	1	606.627	617.225	611.926	417.611	449.758	433.685
Ptms	14.0585	-0.259692	0.00333242	0.0716541	705	1	18842.9	18495.1	18669	16216.1	14971.2	15593.6
Pitpnm2	11.6486	-0.327059	0.00334489	0.0717868	706	1	3335.35	3856.55	3595.95	2770.15	2962.93	2866.54
Got2	12.3639	-0.327135	0.00335794	0.0717868	707	1	6358.56	5449.51	5904.03	4989.29	4423.13	4706.21
Ppip5k2	9.7372	0.44391	0.00335913	0.0717868	708	1	806.263	657.272	731.767	989.506	1001.32	995.413
Zmym1	9.75558	0.432853	0.0033616	0.0717868	709	1	695.967	792.032	743.999	966.305	1042.35	1004.33
Esr1	5.66308	1.37921	0.00336227	0.0717868	710	1	29.7799	33.0543	31.4171	70.7618	92.6867	81.7243
Pik3r1	12.1548	0.28993	0.00338604	0.0720302	711	1	4267.35	3980.5	4123.92	4882.57	5201.09	5041.83
Ppme1	12.2287	-0.300907	0.00338752	0.0720302	712	1	5255.6	5398.65	5327.13	4600.68	4047.82	4324.25
Fam102a	11.4987	-0.298931	0.00338793	0.0720302	713	1	3222.84	3196.1	3209.47	2643.71	2573.95	2608.83
Ddr1	11.156	-0.350084	0.00339698	0.0721216	714	1	2471.73	2680.58	2576.15	1857.21	2184.97	2021.09
Sf3b1	12.9602	0.259641	0.00340257	0.0721392	715	1	7383.2	7182.95	7283.08	8706.03	8732.3	8719.16
Fam110b	10.8981	-0.348553	0.00340815	0.0721565	716	1	2280.92	2025.85	2153.38	1730.76	1651.65	1691.21
Slc38a10	11.4072	-0.310262	0.00341829	0.0722704	717	1	3131.3	2917.04	3024.17	2465.06	2412.89	2438.98
Efcab14	11.2115	0.31518	0.00342804	0.0723139	718	1	2161.8	2090.05	2125.92	2567.15	2722.86	2645
Cad	8.40261	-0.600978	0.00342989	0.0723139	719	1	423.536	410	416.768	295.808	253.749	274.778
Cbarp	11.4938	-0.320297	0.00344409	0.0724927	720	1	3284.61	3160.5	3222.55	2735.35	2426.57	2580.96
Fos	8.62805	-0.575405	0.00344793	0.0724927	721	1	497.434	468.481	482.958	354.969	293.255	324.112
Tmem126a	9.35464	-0.460761	0.00349495	0.0733794	722	1	780.895	755.163	768.029	585.815	530.289	558.052
2810405F15Rik	7.34214	0.947206	0.00350008	0.0733854	723	1	155.517	78.1861	116.852	242.446	208.165	225.306
Psmd9	8.67012	-0.543239	0.00354765	0.0742801	724	1	469.86	513.613	491.737	337.569	337.319	337.444
Nmt2	11.673	0.289498	0.0035747	0.0747433	725	1	2964.75	2942.47	2953.61	3655.25	3564.64	3609.95
Ggnbp2	11.2299	0.310031	0.00360524	0.0752781	726	1	2152.98	2161.24	2157.11	2608.91	2739.57	2674.24
Ubxn1	10.1654	-0.379491	0.00364956	0.0760987	727	1	1335.68	1284.03	1309.86	1042.87	970.931	1006.9
Sfxn3	11.97	0.299251	0.0036559	0.0761261	728	1	3769.91	3463.07	3616.49	4636.64	4263.59	4450.11
Endou	5.62521	1.49508	0.00368924	0.0766386	729	1	18.7503	40.0465	29.3984	92.8024	72.9338	82.8681
Prpf38b	11.4516	0.307413	0.00369062	0.0766386	730	1	2438.64	2596.67	2517.65	3031.16	3199.97	3115.56
Armc5	7.61438	-0.744028	0.00370862	0.0768394	731	1	266.916	240.279	253.598	155.444	147.387	151.416
Clstn3	13.5295	-0.300152	0.00371598	0.0768394	732	1	12808.7	13432.8	13120.7	11586.4	9726.02	10656.2
Sorbs2	12.3806	0.290638	0.00372047	0.0768394	733	1	4989.78	4653.03	4821.41	6195.72	5599.19	5897.45
Tmem132a	11.7416	-0.403645	0.00372057	0.0768394	734	1	3433.51	4443.26	3938.38	3301.45	2652.97	2977.21
Mllt1	10.7778	-0.346174	0.00372701	0.0768676	735	1	1914.74	2044.28	1979.51	1634.48	1479.95	1557.22
Nrg3	8.82165	0.51094	0.00376824	0.0776125	736	1	384.933	373.132	379.032	554.494	525.731	540.113
Apc2	11.3097	-0.356931	0.0037798	0.0777346	737	1	3008.87	2736.51	2872.69	2454.62	2031.51	2243.07
Thoc2l	9.8185	0.458443	0.00378443	0.0777346	738	1	788.615	751.985	770.3	921.064	1195.81	1058.44
Akt1	11.6064	-0.316112	0.0037962	0.077871	739	1	3582.41	3375.35	3478.88	2961.56	2627.14	2794.35
Ldha	12.2031	-0.318098	0.00382453	0.078346	740	1	5093.46	5436.16	5264.81	4582.12	3863.97	4223.04
Rasgrp2	12.4414	-0.315585	0.00383372	0.0784283	741	1	6428.04	5981.55	6204.8	5411.54	4559.88	4985.71
Pdxk	12.8454	-0.269219	0.0038435	0.0785224	742	1	8254.54	7903.79	8079.17	6468.33	6939.34	6703.84
Chmp6	8.92708	-0.499622	0.00386016	0.0787566	743	1	570.23	587.349	578.789	417.611	401.136	409.373
Tnfrsf25	7.68727	0.797012	0.00386943	0.0788396	744	1	187.503	125.225	156.364	310.888	232.476	271.682
Bhlhe40	9.987	0.409984	0.00389983	0.0793523	745	1	832.734	928.063	880.398	1247.03	1092.49	1169.76
Pbx3	10.9555	-0.323051	0.00392406	0.0797383	746	1	2157.39	2284.56	2220.97	1736.57	1814.23	1775.4
Ncoa7	11.0331	0.354004	0.00393636	0.0798813	747	1	1695.25	2011.86	1853.55	2308.46	2429.61	2369.03
Tspan11	4.23124	2.44184	0.00396504	0.0803556	748	1	11.0296	5.08527	8.05743	75.402	12.1556	43.7788
Mt1	12.4368	-0.29959	0.00400132	0.0809826	749	1	5707.81	6594.33	6151.07	4868.65	5126.64	4997.64
Sema6b	11.1203	-0.316178	0.00401833	0.0812186	750	1	2507.02	2460.64	2483.83	2064.85	1925.15	1995
Tm2d2	10.4881	-0.354828	0.00402453	0.0812355	751	1	1689.73	1558.64	1624.18	1291.11	1248.99	1270.05
Ddx17	13.4533	0.252637	0.00403471	0.0813326	752	1	10014.9	10537.3	10276.1	12153.6	12331.9	12242.8
Timm17b	8.17255	-0.618238	0.00404341	0.0813997	753	1	355.153	359.783	357.468	218.086	247.671	232.878
Rai1	10.0307	-0.379323	0.00405717	0.0815685	754	1	1209.95	1175.97	1192.96	901.343	932.944	917.144
Gal	2.38691	3.76044	0.00406925	0.081703	755	1	2.20592	0.635659	1.42079	8.12021	30.3891	19.2546
Txnl4a	11.1901	-0.307579	0.00409686	0.082053	756	1	2565.48	2632.9	2599.19	2141.42	2058.86	2100.14
Ryr2	11.0445	0.316751	0.0041005	0.082053	757	1	1834.22	1950.84	1892.53	2365.3	2349.08	2357.19
Gna12	9.84565	-0.402348	0.00410292	0.082053	758	1	1011.41	1104.14	1057.78	772.58	828.102	800.341
Camta2	11.8851	-0.330453	0.00411429	0.0821719	759	1	3934.25	4548.78	4241.52	3604.21	3142.23	3373.22
Zranb2	12.583	0.262532	0.00413353	0.0824475	760	1	5508.18	5696.14	5602.16	6671.33	6769.17	6720.25
Dhx38	9.82414	-0.430047	0.00414057	0.0824491	761	1	1038.99	1065.37	1052.18	858.422	703.507	780.965
Cntfr	10.2149	-0.375199	0.00414693	0.0824491	762	1	1280.53	1426.42	1353.48	1061.43	1025.63	1043.53
Dlg4	14.689	-0.283717	0.00414992	0.0824491	763	1	29542.7	28743.9	29143.3	25923.2	21957.6	23940.4
Rufy2	10.6674	0.338188	0.00415553	0.0824524	764	1	1398.55	1494.44	1446.49	1805.01	1852.21	1828.61
Ssbp3	11.9409	-0.311962	0.00417679	0.082766	765	1	4717.35	4043.43	4380.39	3498.65	3558.56	3528.61
Arhgef39	6.11278	1.14643	0.00418688	0.0828575	766	1	48.5302	44.4962	46.5132	110.203	95.7256	102.964
Tcea2	7.75287	0.695323	0.00419906	0.0829903	767	1	161.032	177.985	169.508	283.047	265.904	274.476
Tia1	11.2676	0.309209	0.00424181	0.083726	768	1	2188.27	2241.33	2214.8	2637.91	2850.49	2744.2
Cep70	8.65607	0.568022	0.00427987	0.0843673	769	1	302.211	360.419	331.315	453.572	528.77	491.171
Ndufaf8	7.41897	-0.798553	0.0043064	0.0847742	770	1	195.224	256.171	225.697	133.403	126.115	129.759
Kif17	10.542	-0.354305	0.00431169	0.0847742	771	1	1704.07	1667.33	1685.7	1394.36	1242.91	1318.63
Ankrd63	12.4042	-0.26652	0.00433486	0.0851194	772	1	5799.36	6090.89	5945.12	4926.65	4957.98	4942.31
Atg101	9.21993	-0.471702	0.00434084	0.0851264	773	1	710.305	694.14	702.223	541.734	471.031	506.382
Agpat1	11.9362	-0.281768	0.00434784	0.0851537	774	1	4224.33	4417.2	4320.76	3642.49	3465.87	3554.18
Slc15a2	9.95658	0.386401	0.00435704	0.0852066	775	1	909.941	828.264	869.102	1126.39	1145.67	1136.03
Stard9	7.3693	0.777949	0.00436178	0.0852066	776	1	127.943	124.589	126.266	235.486	197.529	216.508
1700086L19Rik	9.0984	-0.521927	0.00437021	0.0852613	777	1	568.024	745.628	656.826	440.811	474.07	457.44
Pcdhgb7	8.15363	-0.629398	0.00439232	0.0855825	778	1	344.123	364.233	354.178	204.165	253.749	228.957
Pde1a	10.692	0.400151	0.00440959	0.085659	779	1	1303.7	1576.44	1440.07	2082.25	1718.5	1900.38
Plekhb1	13.4962	-0.299977	0.00441019	0.085659	780	1	12529.6	13112.4	12821	9432.2	11395.9	10414.1
Smoc2	6.00647	1.24774	0.00441676	0.085659	781	1	36.3976	47.0388	41.7182	120.643	77.4921	99.0676
Zfp692	9.52156	0.441599	0.00441885	0.085659	782	1	606.627	654.729	630.678	919.904	793.155	856.529
Fam171a2	10.286	-0.384496	0.00444356	0.0859433	783	1	1311.42	1541.47	1426.45	1126.39	1059.06	1092.72
Gpcpd1	11.5324	0.292596	0.0044459	0.0859433	784	1	2673.57	2679.3	2676.44	3383.81	3172.62	3278.21
Elavl2	10.7299	0.377806	0.00445052	0.0859433	785	1	1438.26	1541.47	1489.87	1735.4	2136.35	1935.88
Prex1	10.6539	-0.359937	0.0044703	0.0862154	786	1	1875.03	1775.4	1825.21	1530.08	1314.33	1422.2
Mmrn2	7.84379	-0.709264	0.00448126	0.086317	787	1	298.902	288.589	293.746	149.644	209.685	179.664
Chchd1	10.0868	-0.374932	0.00448937	0.0863634	788	1	1280.53	1196.31	1238.42	951.225	958.775	955
Gpr37	11.1118	-0.312491	0.00450059	0.0864696	789	1	2489.38	2442.84	2466.11	1908.25	2063.42	1985.83
Ttc39aos1	5.85504	1.29864	0.00451192	0.0865775	790	1	28.6769	45.1318	36.9044	85.8422	95.7256	90.7839
Ddit4	11.9881	-0.319329	0.00455617	0.087316	791	1	4738.31	4337.1	4537.71	3933.66	3339.76	3636.71
Eif3i	11.4395	-0.349696	0.00456891	0.0874496	792	1	3445.64	2824.87	3135.26	2567.15	2353.63	2460.39
Ablim2	12.6051	-0.274221	0.00460582	0.088045	793	1	6704.89	6998.61	6851.75	5931.23	5400.14	5665.69
Fam135a	9.82037	0.406437	0.00462485	0.0882973	794	1	841.557	729.101	785.329	1019.67	1062.1	1040.88
Phactr1	15.1469	-0.238184	0.0046334	0.0883134	795	1	40080.4	38725	39402.7	34165.2	32647	33406.1
Mul1	10.0101	-0.388888	0.00463734	0.0883134	796	1	1133.84	1226.19	1180.01	945.425	856.972	901.198
Caskin2	8.72804	-0.59776	0.00465507	0.0884342	797	1	444.492	598.791	521.642	383.97	305.41	344.69
Atp5o	12.208	-0.281675	0.00465535	0.0884342	798	1	5438.69	4994.38	5216.53	4396.51	4186.09	4291.3
Naa10	8.96816	-0.508826	0.00470843	0.0893304	799	1	638.613	556.202	597.407	443.131	396.577	419.854
Tbcb	10.2002	-0.362423	0.00478171	0.0905429	800	0	1321.34	1346.33	1333.84	1070.71	1004.36	1037.53
Myoc	5.49034	1.59795	0.00478428	0.0905429	801	0	15.4414	36.2326	25.837	103.243	53.1809	78.2118
Slc25a5	11.6248	-0.348268	0.0047966	0.090588	802	0	3440.13	3686.19	3563.16	3118.16	2479.75	2798.95
Mkx	6.85901	0.89966	0.00479861	0.090588	803	0	81.6189	88.3566	84.9878	168.204	148.906	158.555
Glra3	6.99239	0.972211	0.0048064	0.0906222	804	0	91.5456	90.2636	90.9046	128.763	227.918	178.341
Fbxo2	10.1643	-0.405321	0.00483485	0.0910454	805	0	1174.65	1466.47	1320.56	988.346	1005.88	997.112
Tfip11	9.79334	-0.41127	0.00484967	0.091205	806	0	997.075	1049.47	1023.27	824.781	714.143	769.462
Emd	10.2994	-0.365128	0.00485536	0.091205	807	0	1508.85	1351.41	1430.13	1100.87	1119.84	1110.35
Cckar	1.73841	4.78416	0.00486447	0.091263	808	0	0	1.27132	0.635659	4.64012	30.3891	17.5146
2510009E07Rik	12.1471	-0.265941	0.00490814	0.0918998	809	0	5020.67	4926.36	4973.51	4151.75	4120.76	4136.25
Ccdc77	7.32365	0.785076	0.00491054	0.0918998	810	0	133.458	110.605	122.031	197.205	223.36	210.282
Tra2a	12.046	0.273451	0.00494397	0.0922538	811	0	3815.13	3877.52	3846.33	4514.84	4783.24	4649.04
Dnajb12	10.106	-0.364437	0.00494666	0.0922538	812	0	1223.18	1277.68	1250.43	968.625	973.97	971.297
Sema6d	10.7485	0.361526	0.00495189	0.0922538	813	0	1514.36	1521.13	1517.75	1762.09	2137.87	1949.98
Slc27a4	11.1623	-0.303482	0.00496083	0.0922538	814	0	2520.26	2571.88	2546.07	2115.89	2010.24	2063.07
Supt20	9.76933	0.423983	0.00496142	0.0922538	815	0	830.528	676.342	753.435	992.986	1028.67	1010.83
Pcdhga12	7.96071	-0.649229	0.00496904	0.0922538	816	0	288.975	334.992	311.984	201.845	196.01	198.927
Dlgap4	11.7656	-0.290341	0.00497782	0.0922538	817	0	3683.88	4016.73	3850.31	3226.04	3070.82	3148.43
Abl1	10.2656	-0.353582	0.00497814	0.0922538	818	0	1399.65	1383.19	1391.42	1111.31	1066.66	1088.98
Eng	9.75861	-0.47891	0.00501977	0.0929118	819	0	851.484	1193.77	1022.63	716.899	750.61	733.754
Atf6	11.4089	0.29523	0.00504834	0.0933265	820	0	2398.93	2510.22	2454.58	2934.88	3089.05	3011.96
Atf4	10.1875	0.35484	0.00507789	0.0937424	821	0	1031.27	1031.04	1031.15	1335.19	1302.17	1318.68
Spryd3	12.4427	-0.316906	0.0050832	0.0937424	822	0	6098.26	6328.62	6213.44	5508.98	4467.19	4988.09
Plcb4	9.56457	0.455514	0.0050932	0.0937714	823	0	572.436	720.838	646.637	896.703	876.725	886.714
Mphosph9	9.19931	0.470944	0.00509746	0.0937714	824	0	478.684	519.969	499.327	642.657	741.493	692.075
Gabarapl1	15.1258	-0.246462	0.00510615	0.0937714	825	0	39596.2	38285.8	38941	34282.4	31369.1	32825.7
Frmd5	9.71993	0.404206	0.00510952	0.0937714	826	0	722.438	743.721	733.08	922.224	1018.03	970.129
Gng13	7.60533	-0.727795	0.00514403	0.0942831	827	0	243.754	257.442	250.598	165.884	136.751	151.318
Psip1	12.5617	0.291402	0.00514984	0.0942831	828	0	5086.84	5842.98	5464.91	6452.09	6924.15	6688.12
Itih5	10.4135	0.340908	0.00518726	0.0948537	829	0	1232	1191.86	1211.93	1503.4	1566.56	1534.98
Cdkl2	10.7363	0.327137	0.00520593	0.0950803	830	0	1465.83	1580.25	1523.04	1937.25	1884.12	1910.69
Mien1	11.1209	-0.33268	0.0052383	0.0955564	831	0	2650.41	2348.13	2499.27	2088.05	1881.08	1984.57
Dnajc18	11.4135	0.292649	0.00525101	0.0956732	832	0	2428.71	2500.68	2464.7	2933.72	3104.24	3018.98
Stx17	9.14594	0.463941	0.00525931	0.0957093	833	0	488.611	476.109	482.36	624.096	706.546	665.321
Gm13889	7.93451	-0.663704	0.00527056	0.0957991	834	0	275.74	340.078	307.909	201.845	186.893	194.369
Jag2	8.42507	-0.576648	0.00528493	0.0959453	835	0	376.109	463.396	419.752	277.247	285.657	281.452
Fbxl15	7.16505	-0.83573	0.0053098	0.0962814	836	0	186.4	197.054	191.727	120.643	94.2061	107.425
Fam163b	11.3948	0.297648	0.00531788	0.0963128	837	0	2541.22	2316.34	2428.78	3013.76	2956.86	2985.31
Cyba	7.39669	-0.768754	0.00538533	0.097418	838	0	237.136	202.775	219.956	122.963	135.231	129.097
Stard3	9.88594	-0.391416	0.00541293	0.0977587	839	0	1080.9	1086.34	1083.62	875.823	776.441	826.132
Tbc1d9b	12.4506	-0.259779	0.00541707	0.0977587	840	0	6167.74	6082.62	6125.18	5243.34	4988.37	5115.85
Mapk1ip1	9.81503	0.402971	0.00544789	0.098198	841	0	779.792	786.946	783.369	959.345	1112.24	1035.79
Klc3	4.14769	-2.26692	0.00548589	0.0987655	842	0	48.5302	29.2403	38.8853	11.6003	4.55836	8.07933
Zfp524	7.09406	-0.837482	0.00551088	0.0990977	843	0	176.473	188.791	182.632	110.203	94.2061	102.204
Pcdhgc5	11.9854	-0.34059	0.00552301	0.0991983	844	0	4219.92	4905.38	4562.65	3968.46	3237.96	3603.21
Arl4d	10.1267	-0.484715	0.00556772	0.0998419	845	0	1299.29	1345.69	1322.49	1142.63	747.571	945.1
Amt	9.58885	0.40246	0.00558273	0.0998419	846	0	689.349	650.28	669.814	890.903	879.764	885.333
Eif4ebp3	7.41533	0.751971	0.00558964	0.0998419	847	0	121.325	141.752	131.539	222.726	220.321	221.523
Plcl2	11.6094	-0.279073	0.00558975	0.0998419	848	0	3474.32	3409.04	3441.68	2793.35	2879.36	2836.36
Zc3h7b	12.5212	-0.27751	0.00559554	0.0998419	849	0	6757.83	6185.6	6471.71	5571.62	5106.88	5339.25
Hnrnpu	13.719	0.239389	0.00559836	0.0998419	850	0	12700.6	12121.4	12411	14738.2	14564	14651.1
Igfbp5	12.6409	-0.297692	0.0056265	0.100072	851	0	6571.43	7590.41	7080.92	6087.84	5433.57	5760.7
Pcdhga10	8.1835	-0.597027	0.00562942	0.100072	852	0	354.05	361.055	357.552	249.406	223.36	236.383
Hdac11	12.0389	-0.268804	0.00563107	0.100072	853	0	4564.04	4673.37	4618.71	3727.18	3939.94	3833.56
Ergic3	11.1785	-0.321266	0.00565085	0.100306	854	0	2764.01	2417.41	2590.71	2117.05	2029.99	2073.52
Depp1	7.11452	-0.922794	0.00566838	0.100499	855	0	236.033	145.566	190.8	105.563	95.7256	100.644
Pcdhga7	7.92278	-0.712713	0.00570487	0.100815	856	0	248.166	373.132	310.649	193.725	185.373	189.549
Pm20d1	5.97701	1.4118	0.00570659	0.100815	857	0	18.7503	58.4807	38.6155	106.723	98.7645	102.744
Thbs4	8.86965	-0.634065	0.00571155	0.100815	858	0	447.801	717.659	582.73	322.488	428.486	375.487
Atf6b	10.7367	-0.376575	0.00571277	0.100815	859	0	1736.06	2152.34	1944.2	1588.08	1407.01	1497.55
Sh3bgrl3	11.4954	-0.299769	0.00572623	0.100935	860	0	3377.26	3028.92	3203.09	2637.91	2566.36	2602.13
Mrpl52	8.32838	-0.58136	0.00573502	0.100972	861	0	420.227	366.14	393.183	270.287	255.268	262.778
Btbd2	10.4089	-0.370652	0.00575298	0.101171	862	0	1636.79	1455.02	1545.91	1276.03	1115.28	1195.66
Ankrd11	10.8491	-0.310237	0.00579001	0.101704	863	0	2080.18	2027.75	2053.97	1655.36	1657.72	1656.54
Tmem98	8.70884	-0.506526	0.00579939	0.101751	864	0	507.361	490.093	498.727	352.649	349.474	351.062
Dync1i2	12.1112	0.266427	0.00582304	0.101792	865	0	3930.94	4136.87	4033.91	4925.49	4778.68	4852.08
Hip1r	10.7077	-0.323915	0.00582311	0.101792	866	0	1798.93	1943.21	1871.07	1512.68	1476.91	1494.79
Fn3krp	9.53896	0.415132	0.00583332	0.101792	867	0	675.011	613.411	644.211	899.023	818.985	859.004
Rab26	9.15461	0.453739	0.00583381	0.101792	868	0	465.449	508.527	486.988	682.098	651.846	666.972
Psmg3	7.83405	-0.65962	0.00583528	0.101792	869	0	290.078	283.504	286.791	191.405	171.698	181.552
Egr1	13.1661	-0.371904	0.00585688	0.102051	870	0	8733.23	12179.2	10456.2	8613.22	7547.13	8080.17
Plppr3	10.288	-0.342935	0.00587783	0.102299	871	0	1407.38	1408.62	1408	1117.11	1103.12	1110.12
Zfp628	7.69392	-0.687655	0.005919	0.102897	872	0	254.783	270.791	262.787	172.844	153.465	163.155
Slc20a1	11.8223	0.29307	0.00592996	0.102969	873	0	3066.22	3477.06	3271.64	3951.06	4066.06	4008.56
Rpl18	10.0577	-0.429563	0.00595458	0.103139	874	0	1396.35	1077.44	1236.89	868.863	967.892	918.377
Pcdhga11	8.48045	-0.616676	0.00595554	0.103139	875	0	368.388	516.155	442.272	315.528	261.346	288.437
Fzr1	9.77505	-0.400045	0.00596523	0.103139	876	0	934.206	1078.71	1006.46	750.539	774.921	762.73
Kcnc1	11.6049	0.278346	0.00596764	0.103139	877	0	2766.22	2890.34	2828.28	3447.61	3412.69	3430.15
Oxr1	12.0062	0.286208	0.00597373	0.103139	878	0	3511.82	3938.55	3725.18	4657.52	4427.69	4542.6
Ehbp1l1	9.62306	-0.405756	0.00598201	0.103164	879	0	859.205	956.032	907.618	692.538	677.676	685.107
Rxfp1	7.06113	0.971546	0.0059912	0.103205	880	0	108.09	82.6357	95.3628	249.406	124.595	187.001
Eef1d	10.4879	-0.344157	0.00599947	0.10323	881	0	1700.76	1535.12	1617.94	1242.39	1306.73	1274.56
Amy1	8.60157	0.513846	0.00601533	0.103386	882	0	329.785	320.372	325.078	470.972	457.356	464.164
Hspa12a	11.9806	0.277002	0.00606177	0.104066	883	0	3521.75	3820.95	3671.35	4558.92	4338.04	4448.48
Rita1	8.51035	-0.550087	0.006076	0.104192	884	0	406.992	475.473	441.232	315.528	287.177	301.352
Asb6	8.85674	-0.497344	0.00610948	0.104648	885	0	553.685	547.938	550.812	418.771	361.63	390.2
Ly6h	10.0518	-0.400003	0.00612358	0.104771	886	0	1340.09	1098.42	1219.26	905.983	942.061	924.022
Dzip1	10.1084	0.38992	0.00614365	0.104996	887	0	911.044	1017.69	964.367	1165.83	1361.43	1263.63
Lamtor1	10.2749	-0.352921	0.00618747	0.105571	888	0	1464.73	1335.52	1400.12	1078.83	1113.76	1096.29
Pcbp4	10.9324	-0.322843	0.00619119	0.105571	889	0	2149.67	2221.63	2185.65	1858.37	1636.45	1747.41
Tsc22d1	13.2136	-0.242546	0.00620931	0.105761	890	0	10286.2	10378.4	10332.3	8511.14	8955.66	8733.4
Sgcb	10.9085	0.306228	0.00622731	0.105867	891	0	1687.53	1769.68	1728.6	2141.42	2133.31	2137.36
Tmed9	12.1503	-0.269112	0.00622954	0.105867	892	0	5051.55	4928.9	4990.23	4307.19	3974.89	4141.04
Spen	9.32448	-0.429665	0.00628158	0.106632	893	0	732.364	755.799	744.082	573.055	531.809	552.432
Ncan	12.9112	0.259842	0.00630457	0.106903	894	0	7310.41	6769.14	7039.77	8739.67	8118.44	8429.05
Rbm28	10.5334	0.337923	0.00635375	0.10761	895	0	1275.02	1361.58	1318.3	1592.72	1739.77	1666.25
Atp5a1	14.4401	-0.236269	0.00636051	0.10761	896	0	24236.4	24013.3	24124.9	21211.1	19749.9	20480.5
1110008P14Rik	9.17726	-0.507898	0.00637086	0.107665	897	0	678.32	702.404	690.362	563.775	407.214	485.494
Grem2	10.4126	-0.363868	0.00638206	0.107735	898	0	1411.79	1680.68	1546.24	1233.11	1169.98	1201.55
Rnpc3	9.66546	0.39658	0.00640352	0.107869	899	0	691.555	724.016	707.786	895.543	967.892	931.718
Trpc5	8.22733	0.673343	0.00640428	0.107869	900	0	247.063	227.566	237.314	293.488	463.433	378.46
Gca	9.29078	0.433649	0.00642258	0.108058	901	0	526.111	551.752	538.932	764.46	691.351	727.906
Rrp7a	10.4347	-0.33442	0.0064419	0.108136	902	0	1524.29	1584.06	1554.18	1267.91	1197.33	1232.62
Eif6	9.68946	-0.395527	0.00644771	0.108136	903	0	976.118	917.892	947.005	742.419	697.429	719.924
Eno2	14.992	-0.239241	0.00644866	0.108136	904	0	35322.2	35483.8	35403	31371.9	28614.3	29993.1
Atp13a2	10.7088	-0.357893	0.00646183	0.108237	905	0	1768.04	2021.4	1894.72	1598.52	1358.39	1478.46
H2-DMa	9.05557	-0.519895	0.0064858	0.108519	906	0	725.747	548.574	637.16	466.332	422.408	444.37
St6galnac5	10.1765	-0.364962	0.00649884	0.108617	907	0	1356.64	1270.05	1313.34	954.705	1084.89	1019.8
Pcdh20	8.6432	0.569716	0.00652879	0.108901	908	0	384.933	271.427	328.18	465.172	509.017	487.095
Pex14	10.1369	-0.42025	0.0065302	0.108901	909	0	1336.79	1268.14	1302.46	1112.47	834.18	973.324
Timm50	8.57752	-0.546817	0.00656439	0.10931	910	0	479.787	443.69	461.739	348.009	284.138	316.073
Fxyd1	10.066	-0.373797	0.00657264	0.10931	911	0	1290.46	1149.91	1220.18	904.823	978.528	941.676
Cacna2d1	12.1514	0.275645	0.00657635	0.10931	912	0	4117.34	4152.13	4134.74	5300.18	4710.31	5005.24
Foxo1	12.2283	-0.271577	0.00660274	0.109629	913	0	4993.09	5550.58	5271.84	4416.23	4318.29	4367.26
Eif3b	11.4594	-0.280537	0.00665253	0.110211	914	0	3171.01	3035.91	3103.46	2530.03	2580.03	2555.03
Trpm3	10.5649	0.400916	0.0066596	0.110211	915	0	1399.65	1236.99	1318.32	1499.92	1981.37	1740.64
Arf5	11.1892	-0.327288	0.00666662	0.110211	916	0	2823.57	2407.24	2615.41	2163.46	2005.68	2084.57
Ctsz	10.2239	-0.351151	0.00666691	0.110211	917	0	1366.57	1334.88	1350.73	1104.35	1013.48	1058.91
Rps14	12.4446	-0.787437	0.00668034	0.110313	918	0	8713.37	5933.88	7323.63	4531.08	3955.14	4243.11
Klhl33	9.72823	0.390141	0.00672528	0.110732	919	0	786.409	695.411	740.91	975.585	966.372	970.979
Per1	11.3566	-0.423341	0.0067262	0.110732	920	0	2450.77	3622.62	3036.7	2424.46	2104.44	2264.45
Arpc1a	12.5078	-0.250019	0.00672764	0.110732	921	0	6318.85	6383.93	6351.39	5444.02	5237.56	5340.79
Sv2c	7.28388	-0.940262	0.00675094	0.110995	922	0	282.357	149.38	215.869	92.8024	132.192	112.497
R3hdm1	12.3099	0.292172	0.00676331	0.111078	923	0	4522.13	4654.93	4588.53	6102.92	5134.23	5618.58
Uba1	13.3713	-0.242462	0.0067856	0.111323	924	0	11366	11685.3	11525.7	10058.6	9426.69	9742.66
Krt222	10.096	0.369665	0.0068058	0.111534	925	0	897.808	1027.86	962.835	1248.19	1239.87	1244.03
Etv5	10.9312	-0.321798	0.00684947	0.111829	926	0	2050.4	2315.71	2183.05	1809.65	1683.55	1746.6
Kctd9	8.42188	0.594032	0.00685456	0.111829	927	0	294.49	263.799	279.144	354.969	487.745	421.357
Ift22	10.1197	-0.371405	0.0068557	0.111829	928	0	1209.95	1320.9	1265.42	1041.71	914.711	978.209
Cops8	11.5311	-0.280095	0.00685961	0.111829	929	0	3316.6	3205.63	3261.11	2760.87	2610.42	2685.65
Tmem104	8.61801	-0.509795	0.00686067	0.111829	930	0	457.728	479.923	468.825	336.409	322.124	329.266
Gna11	11.3776	-0.300139	0.00689102	0.112203	931	0	2912.91	2992.05	2952.48	2548.59	2247.27	2397.93
Samd4b	10.6083	-0.324399	0.00692155	0.112579	932	0	1702.97	1790.65	1746.81	1445.4	1344.72	1395.06
Fars2	9.27837	-0.426341	0.0069408	0.112771	933	0	733.467	706.218	719.842	524.334	547.003	535.668
Ddrgk1	10.171	-0.345013	0.0069905	0.113457	934	0	1311.42	1287.21	1299.31	1032.43	1013.48	1022.95
Zfp946	8.70476	0.501861	0.00700973	0.113648	935	0	336.402	364.868	350.635	477.932	515.095	496.514
Kdm4b	11.402	-0.334063	0.00705475	0.114255	936	0	2983.5	3093.12	3038.31	2679.67	2140.91	2410.29
Adcy3	11.0439	-0.29247	0.00706849	0.114356	937	0	2312.9	2360.2	2336.55	1911.73	1903.88	1907.8
Mat2a	12.4624	0.254814	0.00708553	0.114509	938	0	5337.22	4995.65	5166.43	6065.8	6263.19	6164.49
Xpnpep1	10.1119	-0.385008	0.00711836	0.114917	939	0	1375.39	1153.72	1264.56	1002.27	934.464	968.365
Dtd1	10.1293	-0.349121	0.00713103	0.114964	940	0	1277.23	1250.98	1264.1	1013.87	970.931	992.399
Cdh5	8.8459	-0.476862	0.00713641	0.114964	941	0	545.964	539.675	542.82	400.21	379.863	390.037
Sacm1l	11.2217	0.339858	0.00717142	0.115375	942	0	1926.87	2318.89	2122.88	2523.07	2850.49	2686.78
Fzd2	8.97005	-0.461576	0.00717716	0.115375	943	0	572.436	604.512	588.474	409.491	445.2	427.345
Psmd2	12.3895	-0.268073	0.00719441	0.11553	944	0	5716.63	6059.1	5887.87	5135.45	4643.45	4889.45
Far1	12.4204	0.278424	0.00720618	0.115596	945	0	4690.88	5263.89	4977.39	5771.15	6302.69	6036.92
Ap2a1	11.9084	-0.300877	0.00727277	0.116473	946	0	3972.86	4560.22	4266.54	3664.54	3262.27	3463.4
Cpne9	8.38206	0.721344	0.00727618	0.116473	947	0	260.298	259.349	259.824	569.575	287.177	428.376
Cpne5	12.4313	-0.268997	0.00730727	0.116847	948	0	5972.52	6153.18	6062.85	5331.5	4731.58	5031.54
Prmt1	11.6464	-0.342782	0.00732801	0.117055	949	0	4022.49	3197.37	3609.93	3017.24	2675.76	2846.5
Gm715	6.26922	-1.06257	0.00733961	0.117088	950	0	113.605	109.333	111.469	42.9211	63.817	53.3691
Crabp1	7.47399	-0.763022	0.00734827	0.117088	951	0	263.607	199.597	231.602	119.483	153.465	136.474
Tub	11.0468	0.311872	0.00735325	0.117088	952	0	1901.5	1896.17	1898.84	2523.07	2191.05	2357.06
Ralgapa1	11.4237	0.280611	0.00736236	0.11711	953	0	2423.2	2561.71	2492.45	2985.92	3069.3	3027.61
Igsf11	11.4004	0.277834	0.00737341	0.117163	954	0	2426.51	2483.52	2455.01	2929.08	3023.71	2976.39
Flrt3	11.2096	-0.299671	0.00741513	0.117596	955	0	2545.63	2709.18	2627.4	2021.93	2247.27	2134.6
Homer2	9.69611	0.437659	0.00741617	0.117596	956	0	734.57	690.962	712.766	835.222	1095.53	965.374
Ppia	10.1343	-0.390568	0.00745738	0.118034	957	0	1183.47	1390.19	1286.83	1063.75	899.517	981.632
Irf2bp1	9.4259	-0.427982	0.00745937	0.118034	958	0	748.909	846.698	797.804	629.896	556.12	593.008
Hnrnpdl	12.3445	0.273503	0.00748002	0.118237	959	0	5052.65	4408.3	4730.48	5736.35	5699.47	5717.91
Crh	4.8792	1.63413	0.00751817	0.118717	960	0	14.3385	19.0698	16.7041	42.9211	60.7781	51.8496
Akain1	5.43082	1.3916	0.00754913	0.119081	961	0	34.1917	19.0698	26.6307	83.5222	56.2198	69.871
Ube2e1	9.87406	-0.375123	0.0076033	0.119811	962	0	1005.9	1131.47	1068.69	806.221	841.777	823.999
2310011J03Rik	9.65506	-0.422885	0.0076963	0.121151	963	0	1032.37	834.621	933.495	693.698	698.949	696.323
Pard6a	8.68078	-0.535217	0.00774993	0.121868	964	0	515.082	472.931	494.006	383.97	297.813	340.891
Egr3	13.3226	-0.241497	0.00779703	0.122482	965	0	11581.1	10696.9	11139	9415.96	9428.21	9422.09
Cox5b	9.11147	-0.517721	0.00782862	0.122851	966	0	548.17	775.504	661.837	429.211	495.342	462.276
Taz	9.71333	0.393771	0.0078395	0.122895	967	0	756.63	708.125	732.377	1037.07	887.361	962.214
Lamb3	6.9878	-1.03919	0.00786543	0.123054	968	0	168.753	195.147	181.95	46.4012	130.673	88.5371
Cfp	8.04529	0.600205	0.00787687	0.123054	969	0	237.136	191.969	214.553	332.929	317.566	325.247
Gprasp2	11.4266	0.356189	0.00788168	0.123054	970	0	2424.3	2441.57	2432.94	2666.91	3561.6	3114.25
Wars	11.1495	-0.28992	0.00788212	0.123054	971	0	2525.78	2497.51	2511.64	2122.86	1985.93	2054.39
Tafa2	9.13353	0.502901	0.00792625	0.123615	972	0	501.846	441.783	471.815	779.54	557.639	668.59
Bola1	6.62344	-0.984541	0.0079641	0.124078	973	0	140.076	137.302	138.689	87.0023	53.1809	70.0916
Ddx49	8.50687	-0.560939	0.00802713	0.124932	974	0	453.316	430.341	441.829	342.209	256.788	299.498
2010300C02Rik	12.733	-0.251846	0.00805149	0.125182	975	0	7301.59	7556.08	7428.83	6512.41	5965.37	6238.89
Tomm40l	11.1274	-0.312506	0.00807285	0.125275	976	0	2679.09	2306.81	2492.95	2009.17	2005.68	2007.43
Cdk4	10.2846	-0.348335	0.00807398	0.125275	977	0	1444.88	1369.85	1407.36	1171.63	1039.31	1105.47
Abcc5	11.7417	0.260296	0.00809554	0.125481	978	0	3143.43	3114.73	3129.08	3756.18	3739.38	3747.78
Satb1	10.0573	0.431709	0.00812152	0.12573	979	0	851.484	983.365	917.425	1428	1046.9	1237.45
Cln8	10.123	-0.352675	0.00814148	0.12573	980	0	1192.3	1327.89	1260.1	1005.75	967.892	986.819
Bcas1	13.289	-0.273823	0.00814476	0.12573	981	0	10193.5	11817.5	11005.5	8656.14	9549.77	9102.96
Slc38a5	8.19018	-0.653902	0.00815711	0.12573	982	0	430.154	302.574	366.364	257.527	208.165	232.846
Foxp1	13.9319	-0.241607	0.00816358	0.12573	983	0	17744.4	16241.7	16993.1	14754.4	13991.1	14372.8
Ndufb2	9.48226	-0.415397	0.00816752	0.12573	984	0	775.38	876.574	825.977	577.695	660.962	619.329
Pabpc4	8.00046	-0.60248	0.00816965	0.12573	985	0	329.785	301.303	315.544	198.365	217.282	207.824
Ift27	9.11008	-0.442283	0.00818356	0.125816	986	0	655.157	633.117	644.137	495.333	452.797	474.065
Mirg	9.65542	0.408399	0.00821847	0.126206	987	0	764.35	635.659	700.005	981.385	876.725	929.055
Ncln	9.73781	-0.39396	0.00822555	0.126206	988	0	1022.44	935.055	978.749	792.301	697.429	744.865
Mrpl16	9.53654	-0.390196	0.00825148	0.126475	989	0	837.146	863.225	850.185	657.737	639.69	648.714
Svop	11.8512	-0.279508	0.00827591	0.126722	990	0	3852.63	4288.16	4070.4	3476.61	3230.36	3353.48
Emc10	11.0588	-0.305097	0.00828464	0.126727	991	0	2251.14	2491.15	2371.14	1995.25	1843.1	1919.17
Cdc42bpb	11.0333	-0.314072	0.00830567	0.126921	992	0	2341.58	2332.23	2336.91	2024.25	1735.22	1879.73
Olig1	10.5335	-0.358807	0.0083439	0.12732	993	0	1590.47	1766.5	1678.48	1172.79	1445	1308.9
Npc2	11.6898	-0.26199	0.00834858	0.12732	994	0	3632.04	3602.92	3617.48	2982.44	3051.06	3016.75
Acbd6	9.14518	-0.434009	0.0083662	0.127461	995	0	676.114	640.109	658.111	469.812	504.459	487.135
Pglyrp1	6.8186	-1.03099	0.00840487	0.127921	996	0	209.562	113.147	161.355	59.1615	98.7645	78.963
Ifit1bl1	4.1412	1.98732	0.00842259	0.128062	997	0	8.82367	8.89923	8.86145	42.9211	27.3502	35.1356
Ddx5	14.3663	0.224943	0.00844429	0.128196	998	0	19349.2	19723.2	19536.2	22221.5	23443.6	22832.6
Ehmt2	12.2541	-0.261306	0.00844831	0.128196	999	0	5115.52	5580.45	5347.99	4584.44	4339.56	4462
Zbtb16	8.58259	0.555364	0.00847394	0.128353	1000	0	295.593	336.899	316.246	535.934	393.538	464.736
Cdipt	11.3427	-0.282322	0.00847599	0.128353	1001	0	2866.59	2861.74	2864.16	2452.3	2257.91	2355.11
Pik3r2	10.6751	-0.375921	0.00848405	0.128353	1002	0	1823.19	1901.89	1862.54	1636.8	1233.8	1435.3
Tctex1d2	8.79334	0.4671	0.00851851	0.128746	1003	0	386.036	368.682	377.359	526.654	516.614	521.634
Camk2n2	8.65722	0.500355	0.0085509	0.129107	1004	0	333.093	345.799	339.446	519.693	440.642	480.168
Dlx2	7.41321	-0.77254	0.0085623	0.12915	1005	0	208.459	237.101	222.78	99.7626	161.062	130.412
S100a1	11.0587	-0.30504	0.00857198	0.129168	1006	0	2508.13	2233.71	2370.92	1961.61	1876.53	1919.07
Ptp4a3	9.93634	-0.373469	0.00861173	0.129576	1007	0	1037.88	1192.5	1115.19	892.063	829.622	860.842
Il34	10.7598	-0.35843	0.00861614	0.129576	1008	0	1882.75	2043.64	1963.2	1713.36	1349.27	1531.32
Ran	10.7128	-0.304853	0.00863359	0.129709	1009	0	1824.29	1906.34	1865.32	1473.24	1546.8	1510.02
Zdhhc20	11.3631	0.314892	0.00866266	0.130017	1010	0	2452.98	2270.58	2361.78	2672.71	3203.01	2937.86
Fubp1	11.7807	0.291814	0.00869645	0.130395	1011	0	3056.3	3303.52	3179.91	3614.65	4170.9	3892.78
Rgs10	10.2171	-0.377968	0.00871302	0.130514	1012	0	1310.31	1403.54	1356.93	919.904	1168.46	1044.18
Zfc3h1	10.3455	0.337528	0.00877222	0.131272	1013	0	1196.71	1118.12	1157.42	1382.76	1542.25	1462.5
Slc35e2	10.6571	0.326343	0.0087821	0.13129	1014	0	1356.64	1527.49	1442.06	1741.21	1875.01	1808.11
Gdpd5	10.3485	-0.332884	0.00879382	0.131336	1015	0	1458.11	1468.37	1463.24	1220.35	1103.12	1161.74
Cdc37l1	11.3376	0.296188	0.00882254	0.131635	1016	0	2282.02	2388.81	2335.41	2679.67	3055.62	2867.65
Dpp7	9.1717	0.425522	0.00884404	0.131826	1017	0	484.199	511.07	497.634	687.898	648.807	668.352
Gm20219	5.5939	1.25634	0.00887961	0.132226	1018	0	31.9858	30.5116	31.2487	87.0023	62.2976	74.6499
Rorb	10.4702	0.35207	0.0088932	0.132298	1019	0	1238.62	1272.59	1255.61	1767.89	1437.4	1602.64
Frmd8	9.69816	-0.374574	0.00890289	0.132313	1020	0	970.604	921.07	945.837	714.579	744.532	729.555
Rgs9	13.845	-0.249883	0.0089239	0.132378	1021	0	16231.1	15862.2	16046.7	14385.5	12603.9	13494.7
Mef2c	12.6672	0.317441	0.0089278	0.132378	1022	0	5824.72	5829	5826.86	8242.01	6279.9	7260.96
Ttc4	10.2573	0.334392	0.00893348	0.132378	1023	0	1064.36	1115.58	1089.97	1329.39	1419.17	1374.28
Fig4	10.1524	-0.33603	0.00901464	0.13332	1024	0	1299.29	1257.97	1278.63	1018.51	1007.4	1012.95
Fam129b	9.85231	-0.384997	0.00902276	0.13332	1025	0	984.942	1127.66	1056.3	859.582	758.207	808.895
Cyp11a1	7.00787	0.935435	0.00903713	0.13332	1026	0	88.2367	97.8915	93.0641	238.966	116.998	177.982
Cox7a2l	10.5988	-0.387771	0.00903864	0.13332	1027	0	2036.06	1511.6	1773.83	1360.72	1350.79	1355.75
Atp6v1f	10.7311	-0.339841	0.00904106	0.13332	1028	0	2080.18	1744.25	1912.21	1443.08	1578.71	1510.89
Ptgfrn	10.1626	-0.343434	0.00905205	0.133334	1029	0	1273.92	1308.19	1291.05	1067.23	967.892	1017.56
Coq7	8.69599	-0.48458	0.00906554	0.133334	1030	0	485.302	495.814	490.558	365.409	335.799	350.604
Pink1	13.2267	-0.241961	0.00906834	0.133334	1031	0	9983.98	10864.7	10424.3	9015.75	8613.78	8814.77
Cdc42ep4	9.89213	-0.367181	0.00908758	0.133434	1032	0	1022.44	1135.92	1079.18	866.542	806.83	836.686
Med16	9.61585	-0.430436	0.0090928	0.133434	1033	0	920.97	900.729	910.85	766.78	584.99	675.885
C1qb	10.3573	-0.319945	0.00913416	0.133912	1034	0	1455.91	1475.37	1465.64	1160.03	1188.21	1174.12
Ubp1	11.0867	0.28246	0.00915295	0.134058	1035	0	1995.25	1948.93	1972.09	2451.14	2346.04	2398.59
Ccdc84	7.0686	0.771009	0.00921965	0.134904	1036	0	106.987	98.5272	102.757	177.485	173.218	175.351
Psmc3	12.0353	-0.276993	0.00925836	0.13528	1037	0	4703.02	4537.97	4620.49	4083.31	3543.37	3813.34
Socs7	12.4237	-0.250215	0.00926441	0.13528	1038	0	5792.74	6191.32	5992.03	5172.57	4903.28	5037.93
Phactr2	8.52389	0.519904	0.00928923	0.13528	1039	0	303.314	311.473	307.393	401.37	480.147	440.759
Cbx6	15.0703	-0.273312	0.009295	0.13528	1040	0	41222	34422.2	37822.1	32900.8	29688.6	31294.7
Sox8	11.1495	-0.278305	0.00929766	0.13528	1041	0	2468.42	2535.01	2501.72	2043.97	2081.65	2062.81
Fgfr1op2	11.281	0.310365	0.00930737	0.13528	1042	0	2036.06	2433.3	2234.68	2753.91	2788.2	2771.05
Tbc1d16	12.4512	-0.251329	0.00930778	0.13528	1043	0	6206.35	6012.7	6109.52	5350.06	4915.43	5132.75
Nup35	7.09158	-0.781098	0.00934096	0.135507	1044	0	164.341	193.24	178.791	103.243	104.842	104.042
Tmem115	9.41714	-0.42537	0.00934387	0.135507	1045	0	800.748	783.768	792.258	649.617	530.289	589.953
Spout1	9.23276	-0.446973	0.00935027	0.135507	1046	0	657.363	747.535	702.449	562.615	467.992	515.303
Nudt4	11.4923	0.290709	0.00942047	0.136394	1047	0	2428.71	2781.01	2604.86	3113.52	3259.23	3186.37
Unc93b1	8.30986	-0.563485	0.00945719	0.136795	1048	0	425.742	345.799	385.77	266.807	255.268	261.038
Dusp14	10.4246	-0.420826	0.00948184	0.136929	1049	0	1301.49	1879.01	1590.25	1237.75	1138.07	1187.91
Pak6	10.2525	-0.333761	0.00948447	0.136929	1050	0	1399.65	1339.33	1369.49	1126.39	1046.9	1086.65
Ccdc106	10.315	-0.352004	0.0095201	0.137312	1051	0	1473.55	1404.81	1439.18	1224.99	1030.19	1127.59
Tst	9.06584	-0.444051	0.00955474	0.137681	1052	0	655.157	594.977	625.067	476.772	442.161	459.467
Rcan2	12.8487	0.265402	0.00959992	0.138201	1053	0	6208.55	7247.79	6728.17	8058.73	8115.4	8087.07
2900052N01Rik	11.518	0.277486	0.00965646	0.138883	1054	0	2647.1	2680.58	2663.84	3055.52	3402.06	3228.79
Odr4	11.1349	0.291559	0.00969744	0.139239	1055	0	1947.82	2117.38	2032.6	2404.74	2570.92	2487.83
Ctbp1	11.5291	-0.272328	0.00969964	0.139239	1056	0	3169.9	3325.77	3247.84	2792.19	2586.11	2689.15
Dnal4	10.2318	-0.36316	0.00974782	0.139797	1057	0	1354.43	1373.02	1363.73	1169.31	951.178	1060.24
Ptprf	11.0581	-0.283865	0.00975695	0.139797	1058	0	2403.35	2301.72	2352.53	1959.29	1905.39	1932.34
Tyro3	12.3949	-0.240829	0.00977599	0.139938	1059	0	5957.08	5751.45	5854.26	4898.81	5009.64	4954.22
Rnf123	10.1014	-0.405448	0.00984474	0.140789	1060	0	1299.29	1229.37	1264.33	1096.23	812.908	954.568
Zcchc7	9.79359	0.374576	0.00986966	0.140912	1061	0	731.262	827.628	779.445	1044.03	977.009	1010.52
Tyrobp	9.61362	-0.377903	0.00987193	0.140912	1062	0	887.882	898.187	893.034	654.257	720.221	687.239
Hook1	10.1626	0.340235	0.00989083	0.140995	1063	0	969.501	1067.91	1018.7	1272.55	1306.73	1289.64
Syt17	8.08158	0.653335	0.00989632	0.140995	1064	0	176.473	255.535	216.004	381.65	297.813	339.731
Cct7	12.5337	-0.23444	0.00999697	0.142295	1065	0	6425.84	6436.69	6431.26	5460.26	5473.07	5466.67
Grik1	7.23712	0.788578	0.01001	0.142346	1066	0	99.2663	130.31	114.788	171.684	224.879	198.282
Lrpap1	12.0767	-0.273667	0.0100343	0.142558	1067	0	4591.62	4907.29	4749.45	4191.19	3666.44	3928.82
Map4k1	4.62092	1.69086	0.0100447	0.142573	1068	0	12.1325	15.2558	13.6942	38.281	50.142	44.2115
Thap7	7.67603	-0.709654	0.0100656	0.142634	1069	0	250.372	272.698	261.535	193.725	126.115	159.92
Rbck1	10.9679	-0.286654	0.0100764	0.142634	1070	0	2269.89	2154.25	2212.07	1809.65	1817.27	1813.46
Ube2q2	10.1609	0.34422	0.0100774	0.142634	1071	0	1045.6	986.543	1016.07	1212.23	1367.51	1289.87
Pnmal2	12.7514	-0.319972	0.0100866	0.142634	1072	0	6897.9	8509.57	7703.74	5550.74	6791.96	6171.35
Ccdc3	7.31103	0.717255	0.0101145	0.142895	1073	0	118.017	129.675	123.846	215.766	191.451	203.608
Gm20300	10.5593	0.314161	0.0101291	0.142968	1074	0	1329.07	1377.47	1353.27	1605.48	1759.53	1682.5
Lamtor2	10.8565	-0.388396	0.0101786	0.143498	1075	0	2448.57	1793.83	2121.2	1730.76	1510.34	1620.55
Prr16	6.24891	1.00508	0.0101856	0.143498	1076	0	62.8686	44.4962	53.6824	113.683	101.803	107.743
Hmgcll1	9.07393	0.428118	0.0102405	0.144098	1077	0	458.831	470.388	464.609	653.097	597.145	625.121
Psmb4	11.1407	-0.293227	0.0102528	0.144098	1078	0	2625.04	2373.55	2499.3	2105.45	1973.77	2039.61
Wdtc1	10.6975	-0.356701	0.0102567	0.144098	1079	0	1652.23	2105.94	1879.09	1537.04	1397.9	1467.47
Yars2	8.08622	0.569142	0.010278	0.144264	1080	0	241.548	204.682	223.115	320.168	341.877	331.023
Itpr1	14.7981	-0.224176	0.0102954	0.144374	1081	0	31590.9	29991	30791	27250.3	25469.1	26359.7
Pcdhga9	8.26179	-0.541904	0.0103354	0.1448	1082	0	352.947	387.752	370.349	265.647	243.113	254.38
Gpc5	9.3472	0.418777	0.0103632	0.145056	1083	0	564.715	561.923	563.319	685.578	820.505	753.041
Unc5b	10.5067	-0.310391	0.0104162	0.145663	1084	0	1571.72	1668.61	1620.16	1271.39	1341.68	1306.54
Nes	9.51029	-0.456202	0.0104283	0.145699	1085	0	776.483	931.877	854.18	713.418	531.809	622.614
Carhsp1	12.0218	-0.260772	0.0104792	0.146274	1086	0	4782.43	4321.21	4551.82	3743.42	3854.85	3799.14
Cspg4	9.02105	-0.449327	0.0104995	0.146423	1087	0	553.685	660.45	607.068	450.092	439.122	444.607
Lifr	10.1818	0.344217	0.0105233	0.14662	1088	0	1100.75	961.117	1030.93	1262.11	1355.35	1308.73
Lypla2	10.0333	-0.358835	0.0105445	0.14678	1089	0	1150.39	1223.01	1186.7	995.306	855.452	925.379
Fam199x	8.20106	0.549308	0.0105749	0.147004	1090	0	248.166	238.372	243.269	330.609	381.383	355.996
Edil3	11.8547	0.327245	0.01058	0.147004	1091	0	3247.11	3365.82	3306.46	3583.33	4713.34	4148.34
Crtc2	9.04298	0.442569	0.0106062	0.147234	1092	0	434.566	470.388	452.477	660.057	569.795	614.926
Ahcyl1	13.4839	0.226996	0.0106956	0.148339	1093	0	10641.3	10538.6	10590	11973.8	12815.1	12394.5
Isg20	4.15216	-2.01653	0.0107233	0.148587	1094	0	35.2947	36.2326	35.7636	11.6003	6.07781	8.83906
Nufip2	11.8908	0.257134	0.0107707	0.149048	1095	0	3458.88	3488.5	3473.69	3975.42	4327.4	4151.41
Nudc	10.097	-0.392914	0.0107772	0.149048	1096	0	1084.21	1425.78	1255	911.784	999.8	955.792
Zbtb7a	11.2117	-0.315894	0.010787	0.149048	1097	0	2368.05	2924.03	2646.04	2133.3	2118.12	2125.71
Dvl3	9.8922	0.357744	0.0107959	0.149048	1098	0	798.542	880.388	839.465	1113.63	1037.79	1075.71
Mcts1	10.5795	0.326868	0.0108103	0.149111	1099	0	1291.56	1441.04	1366.3	1614.76	1812.71	1713.73
Dock9	10.5927	0.33863	0.0108385	0.149364	1100	0	1421.71	1324.71	1373.21	1914.05	1558.96	1736.5
Prune2	10.8877	0.296243	0.0108855	0.149587	1101	0	1622.45	1797.01	1709.73	2106.61	2092.29	2099.45
Plppr2	11.197	-0.310319	0.010892	0.149587	1102	0	2564.38	2664.05	2614.21	2309.62	1906.91	2108.27
Csgalnact1	8.22634	0.5526	0.0108932	0.149587	1103	0	274.637	219.938	247.287	380.49	344.916	362.703
Ppp4r3b	10.8645	0.298005	0.0108941	0.149587	1104	0	1622.45	1740.44	1681.44	1985.97	2148.51	2067.24
Zfhx2	10.2686	-0.337794	0.0109433	0.150126	1105	0	1310.31	1463.29	1386.8	1150.75	1043.86	1097.31
Atp13a4	8.1249	0.610695	0.0109671	0.150316	1106	0	221.695	230.109	225.902	284.207	405.694	344.951
Cpe	15.7341	0.208779	0.0110258	0.150985	1107	0	51326.2	50077.9	50702	57740.5	59453.2	58596.8
Nr1h2	9.58732	-0.408776	0.0110644	0.151377	1108	0	838.249	934.419	886.334	736.619	598.665	667.642
Tgm2	9.28836	-0.420523	0.0111189	0.151984	1109	0	741.188	705.582	723.385	488.373	592.587	540.48
S100a16	11.1843	-0.298576	0.0111484	0.152251	1110	0	2757.4	2404.06	2580.73	2016.13	2180.42	2098.27
Tuba4a	13.7966	-0.256317	0.0111779	0.152394	1111	0	15568.3	15534.2	15551.3	14125.7	11914	13019.9
Dda1	9.97398	-0.3527	0.011179	0.152394	1112	0	1154.8	1118.12	1136.46	944.264	835.699	889.982
Grk3	10.3573	0.313717	0.0112091	0.152668	1113	0	1173.55	1179.78	1176.67	1510.36	1414.61	1462.49
Tpm1	12.5096	-0.236513	0.0112296	0.152716	1114	0	6145.69	6512.97	6329.33	5333.82	5410.77	5372.3
Sdhc	12.1065	-0.259346	0.0112359	0.152716	1115	0	5101.18	4548.14	4824.66	4022.98	4038.71	4030.85
Pomgnt2	9.06913	-0.42627	0.0112429	0.152716	1116	0	645.231	600.062	622.647	466.332	460.394	463.363
Slc39a3	10.9644	-0.303902	0.0113424	0.153929	1117	0	2079.08	2360.84	2219.96	1878.09	1718.5	1798.3
Slc7a4	11.1213	-0.273837	0.0113961	0.15452	1118	0	2391.21	2507.68	2449.45	2002.21	2049.74	2025.98
A230057D06Rik	7.36407	0.689952	0.0114446	0.155039	1119	0	141.179	118.233	129.706	208.805	209.685	209.245
Kdsr	10.2798	0.330899	0.0114925	0.155549	1120	0	1042.3	1174.7	1108.5	1376.96	1411.57	1394.26
Ap2b1	13.6636	-0.229827	0.0115128	0.155684	1121	0	14671.6	13432.8	14052.2	12159.4	11806.2	11982.8
Chd3	13.8254	-0.227992	0.0115389	0.155899	1122	0	15054.3	16365.7	15710	13688.4	13138.7	13413.5
Rad23a	9.82977	-0.378963	0.0115677	0.156011	1123	0	1011.41	1064.09	1037.75	875.823	720.221	798.022
Ube2l6	6.6744	-0.870147	0.0115831	0.156011	1124	0	131.252	144.93	138.091	81.2021	69.8949	75.5485
Zfp950	10.4429	0.304675	0.0115876	0.156011	1125	0	1279.43	1225.55	1252.49	1553.28	1540.73	1547
Bcan	12.3994	-0.23814	0.0115884	0.156011	1126	0	5707.81	6026.69	5867.25	4890.69	5058.26	4974.47
Jund	9.83391	-0.368996	0.0116178	0.156268	1127	0	948.544	1125.75	1037.15	803.901	802.271	803.086
Stk11	10.9944	-0.320753	0.0116553	0.156634	1128	0	2038.27	2521.66	2279.96	1835.17	1815.75	1825.46
Nrip3	10.6506	0.389923	0.0117167	0.15732	1129	0	1164.72	1643.82	1404.27	1809.65	1870.45	1840.05
Nol12	9.49494	-0.396083	0.0117589	0.157581	1130	0	890.088	765.334	827.711	618.296	639.69	628.993
Fnbp4	10.1668	0.321078	0.011763	0.157581	1131	0	1050.02	1006.88	1028.45	1284.15	1285.46	1284.81
Map1a	14.6897	-0.216921	0.0117683	0.157581	1132	0	29318.8	27661.4	28490.1	25018.4	24007.4	24512.9
Upf2	11.1273	0.27169	0.0117778	0.157581	1133	0	2079.08	1992.79	2035.93	2426.78	2488.86	2457.82
Psme1	8.787	-0.51279	0.011861	0.158554	1134	0	603.318	451.954	527.636	388.61	350.994	369.802
Afg3l1	10.2042	-0.328902	0.0118881	0.158763	1135	0	1287.15	1357.13	1322.14	1100.87	1004.36	1052.61
Zfp367	9.08679	0.415376	0.0118977	0.158763	1136	0	468.757	472.931	470.844	649.617	606.262	627.939
Hes5	7.87717	-0.605728	0.011908	0.158763	1137	0	314.343	265.706	290.024	182.125	199.048	190.587
Trank1	12.9268	0.235773	0.0119485	0.159162	1138	0	7511.15	6840.33	7175.74	8518.1	8381.31	8449.7
Mrps12	8.64556	-0.47845	0.0119674	0.159274	1139	0	498.537	446.869	472.703	330.609	347.955	339.282
Slc2a5	7.57407	-0.665739	0.0119858	0.15938	1140	0	211.768	268.248	240.008	141.524	161.062	151.293
Eri3	11.3152	-0.276826	0.012027	0.159587	1141	0	2899.68	2709.82	2804.75	2411.7	2218.4	2315.05
Eif3g	10.5146	-0.325705	0.0120288	0.159587	1142	0	1758.12	1517.32	1637.72	1338.67	1274.82	1306.75
Ndufaf3	9.36689	-0.442838	0.012033	0.159587	1143	0	816.189	723.38	769.785	640.337	492.303	566.32
Aurkaip1	10.0037	-0.396037	0.0120547	0.159735	1144	0	1338.99	1016.42	1177.71	887.423	902.555	894.989
Gnai2	11.7229	-0.248353	0.0120835	0.159978	1145	0	3714.76	3653.13	3683.95	3078.72	3124	3101.36
Slc25a39	9.81394	-0.362357	0.0120987	0.160039	1146	0	1078.69	962.388	1020.54	814.341	773.402	793.871
Cuta	9.78507	-0.372229	0.0122674	0.162062	1147	0	973.912	1033.58	1003.75	839.862	711.104	775.483
Nexn	11.1889	0.273073	0.0122845	0.162062	1148	0	2165.11	2082.42	2123.76	2668.07	2464.55	2566.31
Zbtb22	9.31328	-0.423552	0.0122849	0.162062	1149	0	753.321	720.202	736.761	607.856	490.783	549.32
Cpne7	8.16334	0.540581	0.0122944	0.162062	1150	0	229.415	246	237.708	332.929	358.591	345.76
Coro1b	10.5713	-0.332803	0.0123594	0.162777	1151	0	1705.17	1709.92	1707.55	1492.96	1218.6	1355.78
Lnpk	11.0845	0.277134	0.0124017	0.163157	1152	0	1900.4	2044.92	1972.66	2366.46	2414.41	2390.44
Fosl2	10.4985	-0.369482	0.0124178	0.163157	1153	0	1401.86	1886.64	1644.25	1273.71	1271.78	1272.75
Epha8	8.31606	-0.514863	0.0124205	0.163157	1154	0	380.521	381.396	380.958	274.927	258.307	266.617
Dennd6b	10.0304	0.346877	0.0124379	0.163243	1155	0	958.471	896.28	927.375	1267.91	1090.97	1179.44
C130074G19Rik	9.9804	0.339564	0.0124592	0.163381	1156	0	872.44	923.613	898.027	1183.23	1089.45	1136.34
Rnf170	8.41501	0.492918	0.0125101	0.163879	1157	0	294.49	280.961	287.726	407.171	402.655	404.913
Macrod2	9.42408	-0.399455	0.0125187	0.163879	1158	0	735.673	842.249	788.961	631.056	565.237	598.147
Srrm4	8.70021	0.468103	0.0125899	0.164619	1159	0	338.608	368.682	353.645	466.332	512.056	489.194
Agap1	12.464	-0.229027	0.012597	0.164619	1160	0	6143.48	6089.62	6116.55	5167.93	5269.46	5218.7
Tasor	10.7385	0.329218	0.0126446	0.165099	1161	0	1495.61	1552.92	1524.26	1713.36	2116.6	1914.98
Tln1	9.94341	-0.338891	0.0126943	0.165605	1162	0	1132.74	1081.89	1107.32	895.543	855.452	875.498
Rnps1	9.81607	-0.360917	0.0127172	0.165761	1163	0	957.368	1085.71	1021.54	755.18	835.699	795.44
Mcm5	8.10242	-0.547639	0.0127766	0.166344	1164	0	318.755	345.799	332.277	234.326	220.321	227.323
Mpp2	12.163	-0.28434	0.0127915	0.166344	1165	0	5044.93	5077.01	5060.97	4585.6	3725.7	4155.65
Bcam	8.0516	-0.591457	0.0128056	0.166344	1166	0	355.153	296.217	325.685	237.806	194.49	216.148
Pan2	9.51346	0.370379	0.0128058	0.166344	1167	0	647.437	638.202	642.819	864.222	797.713	830.968
Neurod1	5.1617	1.58481	0.0128524	0.166675	1168	0	16.5444	24.7907	20.6675	95.1225	28.8696	61.996
Agap2	15.2336	-0.237844	0.0128533	0.166675	1169	0	41315.7	42357.8	41836.8	38111.6	32844.5	35478.1
Rb1cc1	11.0559	0.285705	0.0128922	0.167036	1170	0	1816.57	2039.83	1928.2	2359.5	2341.48	2350.49
Cttnbp2	11.7381	0.254606	0.0129497	0.167593	1171	0	3079.46	3175.75	3127.61	3887.26	3575.27	3731.27
Arpc3	12.1921	-0.283768	0.0129573	0.167593	1172	0	5387.95	4937.8	5162.88	4637.8	3844.22	4241.01
Adra2c	10.3658	-0.318434	0.0130122	0.16816	1173	0	1552.97	1394	1473.48	1194.83	1168.46	1181.65
Cep250	8.75171	-0.454402	0.0130304	0.168252	1174	0	497.434	511.706	504.57	383.97	352.513	368.242
Rasgef1a	14.3435	-0.221506	0.0130514	0.168379	1175	0	23137.9	21755.4	22446.7	19937.4	18566.2	19251.8
Noxred1	4.30587	1.77692	0.0131021	0.16877	1176	0	9.92663	11.4419	10.6842	38.281	34.9474	36.6142
AI837181	9.883	-0.381698	0.013104	0.16877	1177	0	978.324	1177.24	1077.78	893.223	761.246	827.235
Gga1	10.0716	-0.332808	0.0131242	0.168887	1178	0	1234.21	1181.06	1207.63	999.946	917.75	958.848
Ilf3	11.3334	-0.269992	0.0131366	0.168904	1179	0	2690.12	2976.79	2833.45	2373.42	2326.28	2349.85
Irf2bp2	11.2228	0.273588	0.0132428	0.170125	1180	0	2246.73	2100.85	2173.79	2521.91	2733.5	2627.7
Gria4	11.5623	0.266192	0.0132646	0.170132	1181	0	2663.64	2851.57	2757.61	3166.88	3465.87	3316.38
Pnpt1	8.96845	0.419553	0.0132658	0.170132	1182	0	442.286	423.985	433.136	585.815	572.834	579.325
Haus6	8.45735	0.485539	0.0133097	0.170551	1183	0	305.52	288.589	297.054	404.85	426.966	415.908
Lrrfip2	9.24755	0.390459	0.0133461	0.170873	1184	0	543.759	518.062	530.91	691.378	700.468	695.923
Me3	10.887	-0.295775	0.0133966	0.171375	1185	0	1988.63	2207.64	2098.14	1619.4	1799.03	1709.22
Ankrd10	10.2219	0.312204	0.0134333	0.171699	1186	0	1056.63	1086.98	1071.81	1325.91	1335.6	1330.76
Itpka	10.9797	-0.306965	0.0134523	0.171797	1187	0	2398.93	2093.23	2246.08	1923.33	1707.87	1815.6
Paqr7	10.902	-0.281734	0.0134726	0.171911	1188	0	2181.65	2037.92	2109.79	1758.61	1712.42	1735.51
Doc2b	12.0418	-0.24252	0.0135151	0.172309	1189	0	4418.45	4754.1	4586.27	3851.3	3901.96	3876.63
Daam1	11.2249	0.276664	0.0135462	0.17256	1190	0	2061.43	2287.74	2174.58	2577.59	2690.95	2634.27
Usp20	10.9971	-0.275641	0.0135831	0.172886	1191	0	2193.78	2303.63	2248.71	1907.09	1808.15	1857.62
Cep95	8.34307	0.522687	0.0136312	0.173201	1192	0	248.166	293.675	270.92	371.21	407.214	389.212
Epor	8.05749	-0.553495	0.013633	0.173201	1193	0	318.755	326.729	322.742	233.166	206.646	219.906
Mydgf	9.28379	-0.390052	0.0136442	0.173201	1194	0	724.644	702.404	713.524	555.654	533.328	544.491
Vcp	10.2683	-0.394694	0.0136536	0.173201	1195	0	1644.51	1183.6	1414.05	1079.99	1071.21	1075.6
Zc3h7a	10.112	0.322567	0.0137355	0.174094	1196	0	959.574	1019.6	989.586	1221.51	1253.55	1237.53
Cabyr	7.06081	0.81455	0.0137651	0.174323	1197	0	92.6485	108.698	100.673	220.406	133.712	177.059
Grhl1	6.91445	0.798289	0.0137891	0.174482	1198	0	88.2367	94.7132	91.475	184.445	133.712	159.078
Sltm	10.7173	0.291622	0.0138115	0.17462	1199	0	1500.02	1543.38	1521.7	1953.49	1771.68	1862.59
Laptm4b	10.0817	0.335667	0.0138558	0.174939	1200	0	903.323	1025.95	964.639	1214.55	1220.12	1217.34
Hmgcs2	8.93822	-0.507933	0.0138691	0.174939	1201	0	651.849	518.062	584.955	341.049	481.667	411.358
Igsf21	9.04016	-0.500179	0.0138714	0.174939	1202	0	600.009	652.186	626.098	531.294	354.033	442.663
Fam173a	9.67572	-0.361303	0.0139513	0.17559	1203	0	905.529	948.404	926.966	760.98	682.235	721.607
Armcx1	10.7445	0.306318	0.0139677	0.17559	1204	0	1423.92	1661.61	1542.77	1922.17	1893.24	1907.7
Arntl2	6.57108	0.881549	0.0139841	0.17559	1205	0	81.6189	58.4807	70.0498	118.323	139.79	129.056
Zfp810	8.74665	0.442281	0.0139868	0.17559	1206	0	377.212	359.783	368.498	499.973	501.42	500.696
Pdk1	9.79579	0.351378	0.0139905	0.17559	1207	0	837.146	736.729	786.937	1032.43	975.489	1003.96
Zdhhc14	10.5265	-0.301474	0.0140025	0.17559	1208	0	1657.75	1617.12	1637.43	1388.56	1268.74	1328.65
Zfp983	9.19632	0.448249	0.0140115	0.17559	1209	0	432.36	572.093	502.227	706.458	664.001	685.23
Alyref2	6.55934	-0.949293	0.0140157	0.17559	1210	0	161.032	101.07	131.051	71.9219	63.817	67.8695
Phgdh	8.41568	-0.490808	0.0140595	0.175994	1211	0	397.065	412.543	404.804	273.767	302.371	288.069
Nsmce1	8.55579	-0.493889	0.0140908	0.176201	1212	0	478.684	414.45	446.567	336.409	297.813	317.111
Scel	7.3975	0.666921	0.0141125	0.176201	1213	0	129.046	138.574	133.81	227.366	197.529	212.447
Shank3	12.7458	-0.277856	0.0141169	0.176201	1214	0	6730.25	8395.15	7562.7	6327.96	6147.71	6237.84
Lrp10	9.668	-0.353672	0.0141226	0.176201	1215	0	923.176	915.985	919.581	690.218	749.091	719.654
Mib2	10.3829	-0.353852	0.0141969	0.176983	1216	0	1406.27	1612.67	1509.47	1310.83	1051.46	1181.15
Mia2	9.93593	0.349996	0.01424	0.177374	1217	0	808.469	926.791	867.63	1149.59	1062.1	1105.84
Stxbp6	9.83209	0.356629	0.0142656	0.177547	1218	0	839.351	771.69	805.521	958.185	1104.64	1031.41
Atp2c1	12.1606	0.241707	0.0142946	0.177623	1219	0	4032.42	4388.59	4210.5	4933.61	5023.31	4978.46
Epb41l4b	8.93861	0.443901	0.0142952	0.177623	1220	0	413.609	427.799	420.704	518.533	626.015	572.274
Wfs1	11.3855	-0.326929	0.0144089	0.17889	1221	0	2993.43	2999.04	2996.24	2039.33	2738.06	2388.69
Aatk	11.9465	-0.269101	0.0144364	0.178954	1222	0	3977.27	4687.99	4332.63	3661.05	3529.69	3595.37
Clptm1	12.2982	-0.238362	0.0144377	0.178954	1223	0	5415.53	5525.15	5470.34	4836.17	4438.32	4637.24
Tbce	9.72288	0.408659	0.0144672	0.179046	1224	0	821.704	645.194	733.449	1081.15	866.089	973.618
4933412E12Rik	7.64711	-0.61535	0.0144687	0.179046	1225	0	251.475	244.729	248.102	165.884	158.023	161.954
Plod1	10.087	-0.317155	0.0145334	0.1797	1226	0	1213.25	1214.74	1214	977.905	970.931	974.418
Tmem35b	6.66426	0.822923	0.0145676	0.17997	1227	0	79.413	73.1008	76.2569	134.563	135.231	134.897
Zmat4	9.37416	0.39133	0.0145869	0.17997	1228	0	586.774	572.093	579.434	827.101	692.871	759.986
Anapc4	10.3412	0.303217	0.0145909	0.17997	1229	0	1148.18	1187.41	1167.8	1414.08	1467.79	1440.93
Ino80e	9.30861	-0.407608	0.0146066	0.17998	1230	0	695.967	764.698	730.333	599.736	501.42	550.578
Adcy6	9.6345	0.420678	0.0146261	0.17998	1231	0	609.936	764.063	686.999	1027.79	811.388	919.587
Mfsd6	10.9107	0.299164	0.0146273	0.17998	1232	0	1601.5	1869.47	1735.48	2090.37	2180.42	2135.4
Dmd	10.2617	0.314849	0.0146429	0.180026	1233	0	1164.72	1036.76	1100.74	1376.96	1361.43	1369.19
Sirt2	11.8245	-0.249606	0.0146713	0.180229	1234	0	3786.46	4122.89	3954.67	3396.57	3256.19	3326.38
Rsph9	7.18282	-0.743797	0.0147702	0.181246	1235	0	180.885	195.147	188.016	89.3223	135.231	112.277
Tax1bp1	12.0057	0.243254	0.014778	0.181246	1236	0	3624.32	3935.37	3779.84	4442.92	4505.18	4474.05
Brsk1	12.0641	-0.252847	0.0147954	0.18129	1237	0	4755.96	4592.64	4674.3	4161.03	3684.67	3922.85
Ptprz1	12.7215	0.238065	0.0148256	0.18129	1238	0	6348.63	6088.98	6218.81	6933.5	7735.54	7334.52
Phactr3	11.9615	-0.249394	0.01483	0.18129	1239	0	4206.68	4489.66	4348.17	3816.5	3499.3	3657.9
Ccdc38	4.19789	1.83068	0.0148396	0.18129	1240	0	9.92663	9.53489	9.73076	26.6807	42.5447	34.6127
Usp5	12.4723	-0.261513	0.0148506	0.18129	1241	0	6222.89	6220.56	6221.73	5645.87	4734.62	5190.24
Sos1	10.5385	0.301823	0.0148534	0.18129	1242	0	1333.48	1345.69	1339.58	1556.76	1745.85	1651.31
Aifm3	9.59823	0.361403	0.0148884	0.181572	1243	0	659.569	708.125	683.847	915.264	841.777	878.521
Usp40	8.69083	0.445315	0.0149391	0.182043	1244	0	352.947	355.334	354.14	491.853	472.55	482.201
Prelid3a	9.84021	0.375949	0.0149655	0.182218	1245	0	892.293	717.024	804.659	1115.95	972.45	1044.2
Rrp9	8.41719	-0.525591	0.0150554	0.18311	1246	0	356.256	464.031	410.143	303.928	265.904	284.916
Efna5	9.35874	0.379079	0.0150629	0.18311	1247	0	602.215	549.21	575.713	777.22	720.221	748.721
Zfp574	9.07232	-0.463726	0.0151037	0.183384	1248	0	591.186	673.163	632.175	527.814	388.98	458.397
Klhl34	8.8232	-0.479616	0.0151163	0.183384	1249	0	475.375	594.341	534.858	422.251	344.916	383.583
Cercam	7.53132	0.637574	0.0151217	0.183384	1250	0	155.517	141.116	148.317	212.286	249.19	230.738
Mhrt	6.65588	-0.90993	0.015224	0.184213	1251	0	137.87	138.574	138.222	49.8813	97.245	73.5632
Snx17	10.9754	-0.278452	0.0152265	0.184213	1252	0	2234.59	2200.02	2217.31	1921.01	1735.22	1828.11
Add1	13.5397	-0.225495	0.0152265	0.184213	1253	0	12636.6	13115.6	12876.1	11569	10456.9	11012.9
Rb1	10.2827	0.313296	0.0152829	0.184747	1254	0	1062.15	1172.79	1117.47	1370	1407.01	1388.5
Smg1	10.9182	0.331726	0.0153605	0.185472	1255	0	1955.55	1494.44	1724.99	2243.5	2098.37	2170.93
Emg1	9.38216	-0.371953	0.0153678	0.185472	1256	0	752.218	765.97	759.094	568.415	604.743	586.579
Ryr1	9.36738	-0.452731	0.0153795	0.185472	1257	0	898.911	646.466	772.688	592.775	536.367	564.571
Mcrip1	10.036	-0.331642	0.0154125	0.185722	1258	0	1238.62	1116.85	1177.74	957.025	914.711	935.868
Mcrs1	8.42837	-0.595234	0.015485	0.186374	1259	0	481.993	364.868	423.431	338.729	221.84	280.285
Uba3	11.306	0.266102	0.0154912	0.186374	1260	0	2193.78	2423.77	2308.78	2738.83	2814.03	2776.43
Gfod2	8.73206	-0.447088	0.0155363	0.186768	1261	0	511.773	481.194	496.483	375.85	352.513	364.181
Rem2	10.5839	-0.289268	0.0155762	0.186948	1262	0	1742.67	1650.81	1696.74	1409.44	1367.51	1388.47
Tex261	9.17486	-0.400609	0.0155863	0.186948	1263	0	660.672	667.442	664.057	465.172	540.925	503.049
Tox2	7.99705	0.680334	0.0156001	0.186948	1264	0	187.503	216.124	201.814	232.006	414.811	323.408
A530016L24Rik	3.93517	-2.12682	0.0156116	0.186948	1265	0	30.8828	33.0543	31.9686	11.6003	3.03891	7.3196
Ninj1	7.54587	-0.646507	0.0156229	0.186948	1266	0	251.475	216.124	233.799	158.924	139.79	149.357
Ppargc1a	10.0481	0.335812	0.0156253	0.186948	1267	0	961.78	922.977	942.379	1100.87	1277.86	1189.36
Med27	9.50494	-0.403745	0.0156395	0.186971	1268	0	864.72	806.652	835.686	708.778	554.601	631.689
Rps20	10.017	-0.356688	0.0156739	0.187235	1269	0	1278.33	1066.64	1172.48	861.902	969.411	915.657
Tmem132e	8.45517	-0.57708	0.0156953	0.187343	1270	0	484.199	373.132	428.665	342.209	232.476	287.343
Six3	11.2923	-0.292053	0.0157621	0.187991	1271	0	2618.42	2931.66	2775.04	2072.97	2460	2266.48
Ciao2b	8.7322	-0.449575	0.0158136	0.188458	1272	0	493.022	500.9	496.961	387.45	340.358	363.904
Scube1	8.2988	0.707641	0.0158583	0.188842	1273	0	198.533	294.31	246.421	535.934	268.943	402.439
Smarca4	11.5879	-0.275689	0.0158752	0.188895	1274	0	3143.43	3630.25	3386.84	2934.88	2660.56	2797.72
Nr1d2	11.6102	0.247204	0.0159214	0.189251	1275	0	2791.59	2947.55	2869.57	3476.61	3335.2	3405.91
Tyw1	8.6135	-0.459764	0.0159301	0.189251	1276	0	448.904	469.752	459.328	310.888	357.072	333.98
Tmub1	8.26819	-0.530982	0.015959	0.189346	1277	0	408.095	333.085	370.59	266.807	246.151	256.479
Pid1	9.59166	0.354734	0.0159825	0.189346	1278	0	683.834	680.791	682.313	836.382	908.633	872.507
Pfkl	11.3996	-0.288493	0.0159828	0.189346	1279	0	2961.44	3009.85	2985.65	2684.31	2204.73	2444.52
Tpbgl	8.39424	-0.492542	0.015988	0.189346	1280	0	418.021	380.124	399.073	267.967	299.332	283.65
Esrra	10.0959	-0.36666	0.016004	0.189387	1281	0	1108.47	1376.84	1242.66	1041.71	885.841	963.774
Zfp638	11.59	0.248536	0.0160182	0.189392	1282	0	2728.72	2927.85	2828.28	3375.69	3344.32	3360
Sh3bgrl	11.7664	0.264476	0.0160294	0.189392	1283	0	3303.36	3053.71	3178.53	3562.45	4073.65	3818.05
Acer3	7.6917	0.605305	0.0160524	0.189516	1284	0	156.62	178.62	167.62	271.447	238.554	255.001
Hspbp1	9.82558	-0.338191	0.0161269	0.190247	1285	0	1003.69	1036.76	1020.23	842.182	771.882	807.032
Rtel1	8.99614	0.42493	0.0161437	0.190297	1286	0	455.522	425.892	440.707	648.457	534.848	591.652
Tmem109	9.94274	-0.324335	0.0161878	0.190551	1287	0	1087.52	1114.95	1101.23	899.023	860.011	879.517
Rbm3	9.09033	0.439065	0.0161957	0.190551	1288	0	487.508	448.775	468.142	723.859	545.484	634.671
Nop2	9.293	-0.391242	0.016203	0.190551	1289	0	665.084	771.69	718.387	559.134	536.367	547.751
Tex264	10.2637	-0.349761	0.0162284	0.190703	1290	0	1393.04	1382.56	1387.8	1223.83	954.217	1089.02
Snapc4	9.39016	0.371287	0.0162535	0.19085	1291	0	611.039	568.915	589.977	796.941	729.338	763.139
Grk6	10.218	-0.308429	0.0162708	0.190904	1292	0	1348.92	1301.83	1325.37	1099.71	1040.83	1070.27
Smim20	8.96701	-0.41047	0.0162833	0.190904	1293	0	577.95	575.907	576.929	439.651	428.486	434.069
Mc1r	4.56057	-1.67234	0.0163287	0.191288	1294	0	51.8391	32.4186	42.1288	12.7603	13.6751	13.2177
Hsd17b10	9.90528	-0.328185	0.0163495	0.191384	1295	0	1034.58	1114.31	1074.44	841.022	870.647	855.834
Eogt	10.3471	0.294199	0.0163639	0.191397	1296	0	1174.65	1177.88	1176.26	1444.24	1440.44	1442.34
Myh9	10.5164	-0.329647	0.0163884	0.191397	1297	0	1605.91	1678.14	1642.02	1452.36	1160.86	1306.61
Lamtor4	10.272	-0.320857	0.0163957	0.191397	1298	0	1425.02	1338.7	1381.86	1180.91	1031.71	1106.31
Itm2b	13.6592	0.229392	0.0164012	0.191397	1299	0	11812.7	12083.2	11948	13108.3	14905.8	14007.1
Syt3	9.91329	-0.359558	0.0164405	0.191611	1300	0	1147.08	1037.4	1092.24	929.184	773.402	851.293
Akap9	12.3003	-0.233911	0.0164448	0.191611	1301	0	5703.4	5235.93	5469.66	4629.68	4672.32	4651
Slc25a34	8.23557	-0.653108	0.0164952	0.192051	1302	0	336.402	419.535	377.969	312.048	168.659	240.354
Pym1	8.83427	-0.461403	0.0165447	0.192479	1303	0	565.818	505.349	535.583	431.531	346.435	388.983
Septin5	13.6517	-0.268785	0.0165658	0.192577	1304	0	13781.5	14470.8	14126.1	13073.5	10376.3	11724.9
1700025G04Rik	10.2876	0.302356	0.0165871	0.192677	1305	0	1160.31	1090.79	1125.55	1353.76	1422.21	1387.98
Tsen15	6.6187	0.828918	0.0166227	0.192943	1306	0	75.0012	72.4652	73.7332	120.643	141.309	130.976
Acaa2	9.65951	-0.366761	0.0166385	0.192978	1307	0	989.354	847.334	918.344	684.418	739.974	712.196
Sparcl1	15.235	0.22321	0.0166554	0.193027	1308	0	35970.8	35415.8	35693.3	38878.4	44453.1	41665.8
2610008E11Rik	10.1936	0.315252	0.0166798	0.193161	1309	0	1082	1017.69	1049.85	1238.91	1373.59	1306.25
Sirt1	9.44092	0.373009	0.016722	0.193503	1310	0	605.524	615.954	610.739	740.099	841.777	790.938
Cnih2	11.5164	-0.24545	0.0167356	0.193513	1311	0	3214.02	3164.95	3189.48	2621.67	2759.33	2690.5
Akt1s1	9.57066	-0.370384	0.0167767	0.19384	1312	0	890.088	839.07	864.579	719.219	618.418	668.818
Gas2l1	9.38455	-0.380831	0.0167992	0.193921	1313	0	709.202	816.187	762.694	603.216	568.276	585.746
Dmtf1	11.2402	0.255748	0.0168093	0.193921	1314	0	2155.18	2272.48	2213.83	2622.83	2663.6	2643.22
Mapk8ip3	13	-0.240076	0.0168264	0.19394	1315	0	8614.11	9191	8902.55	8039.01	7036.59	7537.8
Dbn1	12.4429	-0.238228	0.0168365	0.19394	1316	0	5765.16	6329.26	6047.21	5315.26	4938.22	5126.74
Trmt61b	7.05921	-0.731356	0.0168733	0.194087	1317	0	155.517	188.155	171.836	106.723	100.284	103.503
Polb	10.1358	-0.316542	0.0168841	0.194087	1318	0	1256.27	1254.79	1255.53	1059.11	957.256	1008.18
Kbtbd3	8.22048	0.527904	0.0168877	0.194087	1319	0	255.886	240.915	248.401	316.688	399.616	358.152
Dgat2	11.7445	-0.323825	0.0169155	0.19426	1320	0	4201.17	3476.42	3838.8	3447.61	2686.39	3067
Cbln4	6.86774	0.814829	0.0169428	0.194425	1321	0	70.5893	105.519	88.0544	162.404	147.387	154.896
Slc25a4	13.5402	-0.205719	0.01696	0.194475	1322	0	12733.7	12852.4	12793	11248.8	10937	11092.9
C1ql3	7.70155	0.702108	0.0170028	0.194819	1323	0	131.252	195.147	163.2	321.328	209.685	265.506
Map4k2	10.76	0.275533	0.0170308	0.194992	1324	0	1614.73	1537.66	1576.2	1965.09	1850.69	1907.89
Lypd6b	7.28363	0.76125	0.0170638	0.195223	1325	0	89.3396	150.016	119.678	215.766	189.932	202.849
Rpl6	8.62227	-0.498902	0.0171035	0.195386	1326	0	529.42	407.458	468.439	351.489	311.488	331.489
4930422M22Rik	5.61301	1.15718	0.0171038	0.195386	1327	0	28.6769	36.8682	32.7726	82.3621	63.817	73.0896
Ldb1	11.0244	-0.292083	0.0171266	0.195499	1328	0	2245.62	2364.02	2304.82	2046.29	1718.5	1882.4
Dst	12.4991	-0.225549	0.0171565	0.195693	1329	0	6478.78	6040.67	6259.72	5384.86	5322.65	5353.75
Cic	11.2663	-0.271057	0.0171778	0.195788	1330	0	2540.11	2871.27	2705.69	2317.74	2166.74	2242.24
Fbxo9	10.5394	0.286263	0.0172044	0.195944	1331	0	1382.01	1313.27	1347.64	1695.96	1590.87	1643.42
Adam23	12.9036	0.218012	0.0173671	0.197648	1332	0	6867.02	7342.5	7104.76	8237.37	8290.14	8263.76
Sox5	9.09527	0.456133	0.0173987	0.197731	1333	0	406.992	526.962	466.977	709.938	571.315	640.626
Tmem94	10.9003	-0.275859	0.0174005	0.197731	1334	0	2179.45	2026.48	2102.96	1793.41	1680.52	1736.96
Mtcl1	11.2978	-0.26385	0.017419	0.197793	1335	0	2713.28	2803.89	2758.59	2426.78	2168.26	2297.52
Mrps7	9.72173	-0.357677	0.0174689	0.198212	1336	0	981.633	929.97	955.801	805.061	686.793	745.927
Cul7	9.51556	-0.352781	0.0175009	0.198345	1337	0	806.263	847.97	827.116	649.617	645.768	647.692
Pon2	10.3765	0.292042	0.0175068	0.198345	1338	0	1207.74	1195.04	1201.39	1436.12	1505.78	1470.95
Asb13	9.95052	0.330316	0.0175439	0.198575	1339	0	855.896	908.993	882.444	1175.11	1043.86	1109.49
Bap1	11.7551	-0.264691	0.0175533	0.198575	1340	0	3629.84	3947.44	3788.64	3379.17	2927.99	3153.58
Nthl1	6.55297	-0.842941	0.0175676	0.198588	1341	0	118.017	133.488	125.753	67.2817	72.9338	70.1078
2900060B14Rik	3.27929	-2.54475	0.0175812	0.198594	1342	0	34.1917	12.7132	23.4525	3.48009	4.55836	4.01923
9530059O14Rik	4.0562	-2.60707	0.0176114	0.198787	1343	0	78.3101	3.81396	41.062	10.4403	3.03891	6.73959
Dapk3	9.56776	-0.389347	0.0176349	0.198904	1344	0	784.204	952.853	868.528	716.899	609.301	663.1
Rad52	8.30013	0.484702	0.0176874	0.199279	1345	0	269.122	263.799	266.46	368.89	376.824	372.857
Nelfe	8.49158	-0.467155	0.0176995	0.199279	1346	0	426.845	419.535	423.19	319.008	293.255	306.131
Atg9a	12.1123	-0.280779	0.0177076	0.199279	1347	0	4451.54	5308.39	4879.97	4318.79	3715.06	4016.93
Mybbp1a	10.6838	-0.295687	0.0177346	0.199315	1348	0	1715.1	1929.86	1822.48	1557.92	1411.57	1484.75
Il18	9.47328	0.357951	0.0177371	0.199315	1349	0	651.849	603.876	627.862	832.902	776.441	804.671
Lrp8	10.1985	0.301021	0.0177959	0.199762	1350	0	1087.52	1029.77	1058.64	1315.47	1293.05	1304.26
Septin7	13.6267	0.231221	0.0178284	0.199762	1351	0	10863	12485.6	11674.3	13483	13924.3	13703.7
Zfp133-ps	4.03645	1.8832	0.0178376	0.199762	1352	0	8.82367	8.26357	8.54362	41.7611	21.2723	31.5167
Plpp2	6.7864	-0.783831	0.0178452	0.199762	1353	0	151.105	138.574	144.84	84.6822	83.5699	84.1261
Hk1	13.0006	-0.266385	0.0178507	0.199762	1354	0	8434.32	9541.88	8988.1	8174.73	6770.69	7472.71
Wdr33	10.7592	-0.284876	0.0178559	0.199762	1355	0	1802.23	2023.94	1913.09	1608.96	1531.61	1570.29
Sik3	12.0632	-0.225298	0.01797	0.200752	1356	0	4580.59	4673.37	4626.98	3968.46	3947.54	3958
Ugcg	11.3637	0.246925	0.0179875	0.200752	1357	0	2377.98	2460	2418.99	2837.43	2903.68	2870.55
Ulk4	6.89954	-0.814607	0.0179955	0.200752	1358	0	190.812	125.861	158.336	85.8422	94.2061	90.0242
Bdnf	7.626	0.692757	0.0180024	0.200752	1359	0	121.325	189.426	155.376	286.527	215.762	251.145
Pdap1	11.6422	-0.265235	0.0180146	0.200752	1360	0	3560.35	3447.82	3504.08	3144.84	2686.39	2915.62
Higd2a	11.024	-0.278662	0.018028	0.200752	1361	0	2419.89	2166.96	2293.43	1963.93	1817.27	1890.6
Prr12	9.95773	-0.339827	0.0180448	0.200752	1362	0	1029.06	1208.39	1118.72	841.022	926.867	883.944
Med10	8.75328	-0.431039	0.0180503	0.200752	1363	0	485.302	516.791	501.046	381.65	361.63	371.64
Tle5	12.899	-0.21523	0.0180677	0.200767	1364	0	8454.18	8004.86	8229.52	7003.1	7174.86	7088.98
Plekhd1	5.61719	1.15814	0.0180782	0.200767	1365	0	27.574	38.1396	32.8568	66.1217	80.531	73.3264
Fn3k	9.44199	-0.37182	0.0181658	0.201593	1366	0	806.263	776.14	791.201	653.097	569.795	611.446
Soga3	9.71872	-0.355053	0.0181866	0.201675	1367	0	869.131	1036.76	952.946	727.339	762.766	745.052
Slf1	9.21498	0.38143	0.0182723	0.202442	1368	0	519.493	521.876	520.685	648.457	708.065	678.261
G2e3	9.28131	0.371786	0.0182824	0.202442	1369	0	570.23	523.783	547.006	702.978	712.624	707.801
Erf	10.5907	-0.297825	0.0183041	0.202534	1370	0	1729.44	1690.22	1709.83	1491.8	1290.02	1390.91
Htr2c	11.2769	-0.283521	0.0183255	0.202624	1371	0	2919.53	2555.35	2737.44	2097.33	2400.74	2249.04
Prps2	9.65448	0.344413	0.0183389	0.202624	1372	0	752.218	678.249	715.233	886.263	929.906	908.084
Vgll4	9.6846	-0.349785	0.018361	0.20272	1373	0	937.515	920.435	928.975	777.22	680.715	728.968
Hook3	10.9615	0.274099	0.018396	0.202959	1374	0	1734.95	1891.72	1813.34	2112.41	2273.1	2192.76
Rpusd1	10.1214	-0.372797	0.0184606	0.203523	1375	0	1377.6	1157.54	1267.57	1100.87	856.972	978.92
Cd200	11.1077	0.30123	0.0185021	0.203833	1376	0	1840.84	2135.18	1988.01	2249.3	2649.93	2449.61
Cstb	9.27446	-0.380716	0.018533	0.203888	1377	0	719.129	694.14	706.634	571.895	513.575	542.735
Lyl1	4.98465	-1.39611	0.0185343	0.203888	1378	0	47.4272	55.3024	51.3648	16.2404	22.7918	19.5161
Tmem240	9.11574	-0.420522	0.0185475	0.203888	1379	0	660.672	622.946	641.809	533.614	425.447	479.53
Dennd5a	13.3339	-0.208219	0.0186011	0.204008	1380	0	10806.8	11389.7	11098.3	9504.13	9709.31	9606.72
Cct3	12.2065	-0.229575	0.0186184	0.204008	1381	0	5309.64	4925.72	5117.68	4309.51	4420.09	4364.8
Synj2bp	10.6344	0.285241	0.0186209	0.204008	1382	0	1367.67	1512.23	1439.95	1742.37	1767.12	1754.74
Mir1900	1.67711	-4.14711	0.0186252	0.204008	1383	0	11.0296	15.8915	13.4605	0	1.51945	0.759727
Shisal1	9.3158	0.44208	0.0186286	0.204008	1384	0	461.037	632.481	546.759	687.898	797.713	742.805
Plekhb2	12.9994	-0.20741	0.0186462	0.204008	1385	0	8849.04	8748.58	8798.81	7602.84	7638.29	7620.57
Tubg1	9.69652	-0.342288	0.0186526	0.204008	1386	0	930.897	937.598	934.247	774.9	698.949	736.924
Canx	14.1201	0.22977	0.0187075	0.204461	1387	0	15740.3	17145.6	16443	18061.7	20502	19281.8
Fam98b	11.2462	0.263116	0.0187741	0.205041	1388	0	2091.21	2343.68	2217.44	2688.95	2633.21	2661.08
Bcl2l1	11.4029	-0.242504	0.0188211	0.205406	1389	0	2977.99	2912.59	2945.29	2496.38	2482.79	2489.59
Trappc4	10.3993	-0.291234	0.0188634	0.205614	1390	0	1543.04	1444.85	1493.95	1226.15	1215.56	1220.86
Hapln1	9.94174	0.346707	0.0188675	0.205614	1391	0	928.691	815.551	872.121	1016.19	1201.89	1109.04
Mtx1	9.64794	-0.341399	0.0188808	0.205614	1392	0	927.588	878.481	903.035	725.019	700.468	712.743
Srarp	6.67257	-0.803832	0.0188953	0.205624	1393	0	124.634	144.93	134.782	75.402	79.0116	77.2068
Agl	10.4132	0.297494	0.0189222	0.205768	1394	0	1299.29	1160.71	1230	1467.44	1555.92	1511.68
Pappa2	4.39809	1.73566	0.0190003	0.206452	1395	0	11.0296	12.0775	11.5536	55.6814	21.2723	38.4769
Ppp4r3a	10.7205	0.28486	0.0190123	0.206452	1396	0	1608.11	1449.3	1528.71	1782.97	1941.86	1862.41
Tpmt	8.35934	0.505487	0.0190357	0.206473	1397	0	261.401	289.861	275.631	348.009	434.564	391.286
Rusc2	10.73	-0.3316	0.0190562	0.206473	1398	0	1704.07	2106.58	1905.32	1653.04	1375.11	1514.07
Tenm4	11.7931	-0.2455	0.0190569	0.206473	1399	0	4073.23	3654.41	3863.82	3275.92	3242.51	3259.22
Rnf41	10.8007	-0.302033	0.0190687	0.206473	1400	0	1967.68	1993.43	1980.55	1767.89	1445	1606.44
Bex2	11.7978	-0.237864	0.0191336	0.206767	1401	0	3988.3	3744.03	3866.17	3352.49	3204.53	3278.51
Grik5	11.9236	-0.264265	0.019148	0.206767	1402	0	3898.96	4615.52	4257.24	3684.26	3405.1	3544.68
Orc4	10.5706	0.292989	0.0191496	0.206767	1403	0	1333.48	1414.34	1373.91	1585.76	1780.8	1683.28
Plp1	17.384	0.273716	0.0191504	0.206767	1404	0	143318	167803	155561	166171	209949	188060
Cep170b	11.1567	-0.27341	0.01925	0.207694	1405	0	2398.93	2620.82	2509.88	2205.22	1947.94	2076.58
Mcf2	7.06017	0.703427	0.0192806	0.207796	1406	0	108.09	101.07	104.58	185.605	154.984	170.295
Zw10	8.71475	0.459673	0.0192868	0.207796	1407	0	352.947	363.597	358.272	433.851	551.562	492.706
Prkch	10.5834	-0.300905	0.019336	0.208067	1408	0	1836.43	1569.44	1702.93	1360.72	1403.98	1382.35
Hebp1	10.7095	-0.308778	0.0193394	0.208067	1409	0	2009.59	1717.55	1863.57	1602	1407.01	1504.51
Gabbr1	14.8575	-0.199417	0.0193704	0.208252	1410	0	32113.7	31505.2	31809.5	28573.9	26832	27702.9
Arnt	10.385	0.297042	0.0194122	0.208554	1411	0	1142.67	1270.05	1206.36	1501.08	1463.23	1482.16
Ccar1	11.0773	0.274605	0.0194348	0.208612	1412	0	1848.56	2080.51	1964.54	2285.26	2467.59	2376.43
Pcdh7	11.9433	0.235229	0.0194582	0.208612	1413	0	3510.72	3749.12	3629.92	4403.47	4142.03	4272.75
Snhg7	6.80035	0.757064	0.0194589	0.208612	1414	0	92.6485	78.8218	85.7351	148.484	141.309	144.897
Cbs	9.69236	-0.335348	0.0195022	0.208899	1415	0	949.647	908.993	929.32	713.418	759.727	736.573
Acsl4	11.138	0.255955	0.0195132	0.208899	1416	0	2038.27	2086.23	2062.25	2557.87	2367.31	2462.59
Pef1	10.8758	-0.270109	0.019565	0.209306	1417	0	2138.64	1988.34	2063.49	1753.97	1668.36	1711.16
Slit3	9.04002	-0.447622	0.0196124	0.209646	1418	0	598.907	630.574	614.74	523.174	378.344	450.759
Zdhhc21	10.5213	0.278135	0.0196245	0.209646	1419	0	1368.77	1300.56	1334.67	1621.72	1615.18	1618.45
Efcab1	7.20672	-0.718836	0.0196905	0.210203	1420	0	202.944	176.078	189.511	134.563	95.7256	115.145
Rbp4	9.80558	-0.361395	0.0197246	0.210329	1421	0	1031.27	997.349	1014.31	690.218	888.88	789.549
Rsrc2	11.0268	0.25511	0.01973	0.210329	1422	0	1886.06	1933.68	1909.87	2318.9	2239.67	2279.29
Kras	11.5079	0.248968	0.0198361	0.211311	1423	0	2638.28	2704.73	2671.5	3017.24	3332.16	3174.7
Ndufs3	9.70416	-0.335438	0.0198708	0.211532	1424	0	940.824	933.148	936.986	772.58	712.624	742.602
Tbrg3	4.47568	-2.25638	0.0199193	0.2119	1425	0	91.5456	5.72093	48.6332	12.7603	7.59727	10.1788
Pcdhb7	8.24883	-0.491157	0.0199452	0.212026	1426	0	338.608	382.667	360.638	256.367	256.788	256.577
Gnas	13.4072	0.237988	0.0200437	0.212924	1427	0	9259.34	10747.1	10003.2	11321.9	12272.6	11797.3
Sclt1	7.82431	0.598456	0.0200862	0.213226	1428	0	164.341	204.047	184.194	244.766	313.007	278.887
Unkl	7.95904	-0.553643	0.0201063	0.213279	1429	0	276.843	326.093	301.468	223.886	186.893	205.389
Dnm1l	12.6885	0.218741	0.0201274	0.213279	1430	0	5936.12	6301.93	6119.02	6930.02	7311.61	7120.82
Leng8	11.862	0.228591	0.0201562	0.213279	1431	0	3445.64	3431.92	3438.78	4136.67	3921.71	4029.19
Map3k9	9.46603	0.370109	0.0201564	0.213279	1432	0	590.083	654.093	622.088	866.542	741.493	804.018
Arrb1	12.9723	-0.225783	0.0201615	0.213279	1433	0	9170	8210.81	8690.4	7607.48	7255.39	7431.43
Brwd1	11.4493	0.240974	0.0202171	0.213328	1434	0	2555.56	2589.04	2572.3	2960.4	3119.44	3039.92
Klhl31	3.76922	-2.05067	0.0202177	0.213328	1435	0	31.9858	23.5194	27.7526	5.80015	7.59727	6.69871
Bckdhb	8.88242	0.416364	0.0202307	0.213328	1436	0	440.08	376.946	408.513	526.654	563.717	545.185
N4bp3	7.05544	-0.751732	0.0202331	0.213328	1437	0	162.135	183.07	172.602	122.963	82.0505	102.507
Fmc1	7.94909	-0.583416	0.0202365	0.213328	1438	0	350.741	254.264	302.502	192.565	211.204	201.885
Kcng3	3.64697	-2.24217	0.0202825	0.213664	1439	0	38.6036	15.8915	27.2475	6.96018	4.55836	5.75927
Col19a1	8.29246	0.540089	0.0203152	0.213842	1440	0	291.181	228.837	260.009	443.131	313.007	378.069
Cspp1	9.57679	0.342011	0.0203276	0.213842	1441	0	673.908	682.698	678.303	899.023	820.505	859.764
Myh14	9.29768	-0.370932	0.020346	0.213862	1442	0	688.246	743.086	715.666	576.535	530.289	553.412
Ralgps1	10.5565	0.28858	0.0203578	0.213862	1443	0	1455.91	1269.41	1362.66	1663.48	1665.32	1664.4
Plaa	10.3579	0.31248	0.020402	0.214041	1444	0	1244.14	1111.13	1177.63	1353.76	1571.11	1462.44
Acap3	11.1648	-0.268762	0.0204073	0.214041	1445	0	2446.36	2593.49	2519.93	2230.74	1952.5	2091.62
Gpi1	13.1873	-0.225879	0.0204171	0.214041	1446	0	10334.7	9840.01	10087.4	9149.16	8101.73	8625.44
Fam155a	9.97077	0.346059	0.020432	0.214049	1447	0	806.263	973.83	890.046	1195.99	1066.66	1131.32
Hgs	10.2331	-0.310879	0.0204479	0.214067	1448	0	1259.58	1421.33	1340.46	1131.03	1030.19	1080.61
Cbr3	9.30038	-0.3806	0.0204854	0.214312	1449	0	684.937	753.892	719.415	591.615	513.575	552.595
Mrpl14	8.26054	-0.493707	0.0205554	0.214896	1450	0	375.006	352.791	363.898	273.767	243.113	258.44
Pot1b	8.8507	0.43637	0.0205975	0.215187	1451	0	376.109	417.628	396.869	486.053	588.029	537.041
Jup	10.0018	-0.313279	0.0206195	0.215269	1452	0	1104.06	1181.69	1142.88	879.303	960.295	919.799
Supt6	12.1566	-0.235761	0.0207141	0.215693	1453	0	4667.72	5241.01	4954.37	4275.87	4138.99	4207.43
Cep78	7.61401	0.583813	0.0207306	0.215693	1454	0	168.753	151.287	160.02	232.006	247.671	239.838
Phka1	9.3872	0.418322	0.0207338	0.215693	1455	0	518.391	640.109	579.25	682.098	866.089	774.093
Caprin2	7.1457	0.685077	0.0207454	0.215693	1456	0	102.575	120.775	111.675	179.805	179.296	179.55
Asxl2	9.79807	0.323649	0.0207513	0.215693	1457	0	791.924	799.659	795.792	961.665	1030.19	995.927
Mdk	8.50162	-0.457819	0.0207537	0.215693	1458	0	447.801	401.737	424.769	308.568	309.969	309.268
Fgf1	11.2358	0.307156	0.0207597	0.215693	1459	0	2175.03	2161.24	2168.14	2324.7	3040.43	2682.56
Btbd11	7.8626	0.646756	0.0209971	0.217863	1460	0	148.899	223.116	186.008	243.606	338.838	291.222
Dag1	12.0039	-0.22993	0.0210132	0.217863	1461	0	4277.27	4618.07	4447.67	3865.22	3719.62	3792.42
Naa16	7.63742	0.580992	0.0210354	0.217863	1462	0	169.856	155.737	162.796	262.167	224.879	243.523
Ptp4a1	9.4253	0.352529	0.0210459	0.217863	1463	0	635.304	581.628	608.466	762.14	791.635	776.888
Mdm4	10.8833	0.259717	0.0210539	0.217863	1464	0	1780.18	1672.42	1726.3	2086.89	2046.7	2066.8
Gabbr2	11.1112	0.345128	0.0210547	0.217863	1465	0	1763.63	2161.88	1962.75	2865.27	2121.16	2493.22
Pmm1	11.2284	-0.250343	0.0211054	0.218238	1466	0	2531.29	2702.19	2616.74	2252.78	2146.99	2199.88
Sestd1	10.3153	0.291216	0.02122	0.219274	1467	0	1111.78	1191.86	1151.82	1440.76	1378.14	1409.45
Slc35f5	8.41351	0.458777	0.0212592	0.219331	1468	0	307.725	273.969	290.847	401.37	398.097	399.734
Grwd1	8.5342	-0.475352	0.0212608	0.219331	1469	0	440.08	434.155	437.118	353.809	275.021	314.415
Srrm1	11.3403	0.24825	0.0212776	0.219331	1470	0	2284.23	2473.99	2379.11	2782.91	2868.73	2825.82
Dmac1	9.04878	-0.390912	0.0212834	0.219331	1471	0	624.275	588.621	606.448	476.772	448.239	462.506
Rbm5	11.7389	0.245307	0.0213138	0.219494	1472	0	3009.97	3268.56	3139.27	3898.86	3543.37	3721.11
Atp5pb	11.9286	-0.223271	0.0213407	0.219623	1473	0	4171.39	4252.56	4211.98	3549.69	3666.44	3608.07
Sh3glb2	11.5999	-0.244832	0.0213602	0.219674	1474	0	3440.13	3317.51	3378.82	2995.2	2707.67	2851.43
Ptpn2	9.8892	0.316269	0.0213817	0.219746	1475	0	841.557	858.14	849.849	1104.35	1011.96	1058.15
Sytl2	9.95998	0.403338	0.0213968	0.219752	1476	0	787.512	944.59	866.051	1350.28	940.542	1145.41
Fam227a	8.62148	0.483541	0.0214577	0.220038	1477	0	391.55	274.605	333.078	451.252	480.147	465.7
Srpr	10.6823	-0.272678	0.0214582	0.220038	1478	0	1739.37	1872.65	1806.01	1447.72	1542.25	1494.98
Coro1c	10.749	-0.284365	0.0214681	0.220038	1479	0	2009.59	1788.75	1899.17	1625.2	1493.62	1559.41
Zfp9	8.69553	0.420188	0.0215233	0.220454	1480	0	359.564	357.241	358.403	474.452	484.706	479.579
Adprhl2	8.46137	-0.474584	0.0215403	0.220479	1481	0	406.992	423.985	415.488	330.609	267.424	299.016
Sox4	10.7543	-0.291432	0.0216273	0.22122	1482	0	2027.24	1794.47	1910.85	1455.84	1666.84	1561.34
Spsb3	9.93624	-0.333538	0.0217366	0.222189	1483	0	998.178	1201.4	1099.79	888.583	856.972	872.777
Nectin1	9.32666	0.374684	0.021824	0.222931	1484	0	519.493	608.326	563.91	743.579	718.702	731.14
Syn2	12.7911	0.211701	0.0218528	0.223075	1485	0	6412.6	6760.24	6586.42	7798.88	7455.96	7627.42
Unc80	12.3995	0.248432	0.0218922	0.2232	1486	0	5398.98	4515.09	4957.04	6003.16	5773.92	5888.54
Smpd3	12.9085	-0.245533	0.0218945	0.2232	1487	0	8431.02	8311.88	8371.45	7725.8	6396.9	7061.35
Foxj1	8.30056	-0.575938	0.0219305	0.223417	1488	0	394.859	375.039	384.949	186.765	329.721	258.243
Syt13	10.8477	0.321435	0.0219561	0.223528	1489	0	1479.07	1817.99	1648.53	2258.58	1861.33	2059.95
Dync1h1	13.2979	-0.233678	0.0220557	0.224391	1490	0	11447.6	10393.7	10920.6	9911.3	8663.92	9287.61
Fxyd2	7.53019	-0.595161	0.0220958	0.224648	1491	0	217.283	237.101	227.192	147.324	153.465	150.394
Agtr2	4.01599	1.9583	0.0221156	0.224699	1492	0	13.2355	3.1783	8.2069	19.7205	44.0642	31.8923
Srprb	9.58685	-0.335178	0.022311	0.226532	1493	0	884.573	842.884	863.729	685.578	683.754	684.666
Plekho2	8.5134	-0.448336	0.0223709	0.226884	1494	0	408.095	445.597	426.846	324.808	300.852	312.83
Gabarapl2	9.42812	-0.34536	0.0223756	0.226884	1495	0	774.277	778.683	776.48	600.896	621.457	611.176
Serac1	9.35508	0.350096	0.0224677	0.227666	1496	0	591.186	568.915	580.05	749.379	729.338	739.359
Katnb1	9.77543	-0.347815	0.0224834	0.227672	1497	0	934.206	1043.12	988.661	845.662	708.065	776.864
Zbtb11	10.7665	0.272266	0.0225314	0.228006	1498	0	1551.86	1618.39	1585.13	1815.45	2013.28	1914.36
Abca3	11.0462	-0.308516	0.0226621	0.229176	1499	0	2489.38	2217.18	2353.28	2127.5	1672.92	1900.21
Spx	6.22633	0.911552	0.0226901	0.229306	1500	0	55.1479	54.031	54.5895	121.803	83.5699	102.687
Foxo4	10.6377	-0.302944	0.0227291	0.229417	1501	0	1588.26	1950.84	1769.55	1382.76	1486.03	1434.39
Eif2b2	9.27892	-0.369333	0.0227386	0.229417	1502	0	656.26	755.799	706.03	532.454	560.678	546.566
2410002F23Rik	10.1265	-0.301082	0.022749	0.229417	1503	0	1291.56	1189.95	1240.76	1017.35	996.762	1007.05
Medag	7.26963	0.814605	0.0227616	0.229417	1504	0	87.1337	145.566	116.35	267.967	141.309	204.638
Rbm10	9.19377	-0.382465	0.0227814	0.229437	1505	0	638.613	698.59	668.601	548.694	477.108	512.901
Tac2	6.05754	1.18341	0.0227938	0.229437	1506	0	33.0888	55.3024	44.1956	53.3614	147.387	100.374
4833420G17Rik	9.97756	0.317973	0.0228152	0.229499	1507	0	973.912	832.078	902.995	1134.51	1116.8	1125.65
Orc5	9.32591	0.353215	0.0229316	0.230517	1508	0	588.98	546.667	567.823	731.979	718.702	725.34
Maml3	7.66926	-0.624486	0.0229956	0.230942	1509	0	244.857	260.62	252.739	197.205	130.673	163.939
Eef1a2	14.5829	-0.209336	0.0230154	0.230942	1510	0	25265.5	27508.8	26387.1	23802.7	21843.7	22823.2
Tmem158	12.2826	-0.215045	0.0230196	0.230942	1511	0	5300.82	5434.89	5367.85	4727.12	4521.89	4624.51
St6galnac6	11.9318	-0.262782	0.0231032	0.231628	1512	0	4569.56	3989.4	4279.48	3830.42	3303.29	3566.86
Ogfr	10.108	-0.306993	0.0231262	0.231691	1513	0	1224.28	1230.64	1227.46	1054.47	929.906	992.186
Rrnad1	9.19972	0.367522	0.0231401	0.231691	1514	0	512.876	522.512	517.694	700.658	635.132	667.895
Mrps23	9.74016	-0.318787	0.023157	0.231707	1515	0	952.956	957.303	955.13	750.539	780.999	765.769
Cope	10.7215	-0.331989	0.0232102	0.232087	1516	0	1877.24	1911.43	1894.33	1736.57	1273.3	1504.93
Alg6	8.35841	0.468347	0.023288	0.232711	1517	0	304.417	253.628	279.022	377.01	395.058	386.034
Akap8l	11.1154	0.256674	0.0233205	0.232767	1518	0	1923.56	2135.82	2029.69	2398.94	2450.88	2424.91
Psmd7	11.4345	-0.237559	0.0233304	0.232767	1519	0	2994.53	3016.2	3005.37	2632.11	2466.07	2549.09
2500002B13Rik	3.65966	2.00001	0.0233396	0.232767	1520	0	8.82367	3.81396	6.31881	23.2006	27.3502	25.2754
Nudt18	10.295	-0.310928	0.0234302	0.233245	1521	0	1451.49	1346.96	1399.23	1222.67	1033.23	1127.95
Rnf128	8.73583	0.453689	0.0234404	0.233245	1522	0	373.903	354.698	364.3	428.051	569.795	498.923
Otx2	4.36709	1.95036	0.0234733	0.233245	1523	0	16.5444	4.44962	10.497	12.7603	68.3754	40.5679
Uhmk1	12.8425	0.204092	0.0234769	0.233245	1524	0	6899.01	6786.93	6842.97	7729.28	8036.39	7882.84
Fabp7	10.3578	0.366757	0.0234797	0.233245	1525	0	1315.83	995.443	1155.64	1307.35	1672.92	1490.14
Ptprn	13.4194	-0.264356	0.0234799	0.233245	1526	0	11690.3	12322.9	12006.6	11255.8	8736.86	9996.31
Msantd1	5.86081	-1.06803	0.0235727	0.234014	1527	0	92.6485	75.6435	84.146	49.8813	30.3891	40.1352
Mettl22	8.51425	-0.488031	0.0236055	0.234186	1528	0	452.213	413.814	433.014	356.129	261.346	308.738
Ppm1h	10.8779	0.254842	0.0236495	0.234469	1529	0	1760.32	1685.13	1722.73	2105.45	2005.68	2055.57
Nfat5	11.569	0.232769	0.0236997	0.234813	1530	0	2879.82	2725.71	2802.77	3221.4	3365.59	3293.5
Tspan33	8.43578	0.455038	0.0237669	0.235325	1531	0	293.387	298.124	295.756	379.33	431.525	405.427
Ube2g1	11.1775	0.242203	0.0238241	0.235737	1532	0	2158.49	2100.85	2129.67	2468.54	2569.4	2518.97
Zfp160	9.38046	0.351847	0.0239935	0.237144	1533	0	627.583	552.388	589.986	759.82	746.052	752.936
Morn1	6.38886	-0.906255	0.0239976	0.237144	1534	0	133.458	95.9846	114.721	70.7618	51.6614	61.2116
Ecpas	11.7547	0.223615	0.0240346	0.237356	1535	0	3216.23	3179.57	3197.9	3663.37	3804.71	3734.04
Acot8	7.76428	-0.546312	0.024109	0.237846	1536	0	268.019	257.442	262.73	177.485	182.334	179.91
Eef1a1	14.6082	-0.205994	0.0241157	0.237846	1537	0	28177.3	25467.7	26822.5	22613.6	23893.4	23253.5
Sirt7	9.03829	0.403535	0.0242194	0.238671	1538	0	494.125	420.171	457.148	662.377	547.003	604.69
Fcho2	10.6312	0.287892	0.0242308	0.238671	1539	0	1431.64	1439.13	1435.39	1605.48	1899.32	1752.4
Akap12	8.87447	0.396296	0.0242823	0.238901	1540	0	432.36	385.845	409.102	535.934	540.925	538.43
Tmem107	7.34475	-0.696813	0.0243045	0.238901	1541	0	249.269	164.636	206.952	112.523	142.829	127.676
Pdlim5	9.88849	0.317182	0.0243235	0.238901	1542	0	833.837	864.497	849.167	997.626	1118.32	1057.97
Zfp932	9.06089	0.377407	0.0243306	0.238901	1543	0	494.125	443.055	468.59	621.776	595.626	608.701
Lrp1b	9.65103	-0.372701	0.0243329	0.238901	1544	0	1026.85	802.838	914.846	735.459	677.676	706.568
Mrpl12	9.53438	-0.354259	0.0243565	0.23897	1545	0	841.557	835.256	838.407	714.579	597.145	655.862
Tagln	9.68252	-0.461336	0.0243878	0.23897	1546	0	1117.3	811.101	964.199	844.502	556.12	700.311
Acvr1c	11.5868	0.243638	0.0244085	0.23897	1547	0	2668.06	2985.69	2826.87	3273.6	3420.29	3346.95
Luc7l	11.4784	0.229462	0.0244149	0.23897	1548	0	2614.01	2656.42	2635.22	3071.76	3107.28	3089.52
Pwwp2b	9.63412	-0.338933	0.0244188	0.23897	1549	0	871.337	915.985	893.661	755.18	657.923	706.551
Cct2	12.3041	-0.208807	0.024492	0.239532	1550	0	5434.28	5438.7	5436.49	4709.72	4698.15	4703.94
Reep2	11.575	-0.255511	0.024585	0.240286	1551	0	3354.1	3312.42	3333.26	3024.2	2560.28	2792.24
Ercc2	8.46723	-0.442485	0.0246263	0.240426	1552	0	403.683	421.442	412.562	310.888	296.293	303.591
Golga1	9.74036	0.323787	0.0246362	0.240426	1553	0	813.983	715.117	764.55	953.545	960.295	956.92
Mrpl50	10.2205	0.292895	0.0246469	0.240426	1554	0	1118.4	1037.4	1077.9	1264.43	1376.62	1320.53
Cdkn1a	9.76643	-0.336146	0.0246823	0.24054	1555	0	1050.02	907.086	978.551	738.939	811.388	775.164
Zfp260	10.7394	0.255669	0.024732	0.24054	1556	0	1571.72	1557.37	1564.54	1865.33	1870.45	1867.89
Itga10	6.43884	0.820812	0.0247397	0.24054	1557	0	65.0746	65.4729	65.2737	109.043	121.556	115.3
Ildr2	10.6227	0.290943	0.0247439	0.24054	1558	0	1545.24	1305.64	1425.44	1831.69	1656.2	1743.95
Cops7a	11.0843	-0.262476	0.0247453	0.24054	1559	0	2349.3	2406.61	2377.95	2121.7	1843.1	1982.4
Srgap3	12.5717	0.20653	0.024758	0.24054	1560	0	5705.6	5628.76	5667.18	6691.05	6387.78	6539.42
Tm2d3	9.56905	-0.347382	0.0248028	0.24054	1561	0	880.161	833.349	856.755	723.859	622.976	673.417
Zbtb7b	8.49426	-0.482147	0.0248221	0.24054	1562	0	358.462	493.907	426.184	310.888	299.332	305.11
Slc18a3	7.37325	-0.617862	0.024823	0.24054	1563	0	207.356	203.411	205.384	121.803	145.868	133.835
Pcnx3	9.59685	-0.344289	0.0248364	0.24054	1564	0	861.411	883.566	872.489	742.419	632.093	687.256
Hpca	16.4577	-0.206681	0.024837	0.24054	1565	0	97249	96132	96690.5	89330.4	78239.7	83785.1
Pim3	9.43848	-0.36133	0.024861	0.24054	1566	0	848.175	724.652	786.413	628.736	595.626	612.181
Nxf1	11.1002	0.24953	0.0248648	0.24054	1567	0	1929.07	2097.68	2013.38	2395.46	2391.62	2393.54
Cyp4x1	7.30703	0.644475	0.0249037	0.240762	1568	0	147.796	105.519	126.658	203.005	192.971	197.988
Ppp4c	9.38027	-0.34992	0.0249525	0.24108	1569	0	715.82	788.853	752.337	603.216	577.392	590.304
Zfand3	10.7659	-0.255419	0.0249832	0.241223	1570	0	1913.63	1891.09	1902.36	1570.68	1616.7	1593.69
Cisd2	10.7966	0.258192	0.0250157	0.241383	1571	0	1689.73	1563.09	1626.41	1925.65	1964.65	1945.15
Ptma	9.35379	-0.363229	0.0250672	0.241726	1572	0	683.834	800.295	742.065	547.534	606.262	576.898
Igsf9b	11.5332	0.239721	0.025112	0.242004	1573	0	2591.95	2863.01	2727.48	3172.68	3268.34	3220.51
Atad2b	9.03656	0.37862	0.0252461	0.243142	1574	0	457.728	463.396	460.562	573.055	624.495	598.775
Cul1	11.4778	0.228927	0.0252751	0.243267	1575	0	2594.16	2674.85	2634.51	3084.52	3090.57	3087.54
C4b	8.40878	-0.508121	0.0253167	0.243512	1576	0	411.404	399.194	405.299	225.046	344.916	284.981
Ten1	8.7875	-0.422686	0.0254194	0.244317	1577	0	509.567	513.613	511.59	419.931	343.397	381.664
Tab1	9.2381	-0.35723	0.025447	0.244317	1578	0	693.761	673.163	683.462	542.894	524.211	533.553
Ubfd1	10.8698	0.253256	0.0254487	0.244317	1579	0	1678.7	1749.33	1714.02	2093.85	1992	2042.93
Hrh3	11.5835	-0.251836	0.025487	0.24453	1580	0	3082.77	3614.99	3348.88	2864.11	2760.85	2812.48
Gmcl1	9.97552	0.307381	0.0255103	0.244599	1581	0	943.03	867.039	905.034	1068.39	1171.5	1119.94
Ltk	7.69675	0.57341	0.0255937	0.245192	1582	0	195.224	144.93	170.077	269.127	237.035	253.081
Pcif1	9.46246	-0.35168	0.0256045	0.245192	1583	0	806.263	787.582	796.922	671.657	577.392	624.525
3300002P13Rik	8.92323	0.422757	0.0256582	0.245551	1584	0	369.491	469.117	419.304	589.295	534.848	562.071
Ctps2	9.06222	0.395194	0.0256925	0.245613	1585	0	509.567	422.713	466.14	574.215	651.846	613.03
Ip6k2	11.1113	-0.268873	0.0256971	0.245613	1586	0	2380.18	2476.53	2428.36	2187.82	1843.1	2015.46
Adcy8	7.38862	0.600591	0.0257491	0.245955	1587	0	136.767	135.395	136.081	203.005	209.685	206.345
Serpina3i	4.61674	-1.51422	0.025771	0.246009	1588	0	39.7065	43.2248	41.4657	9.28024	19.7529	14.5166
Hpcal4	14.2041	-0.196564	0.0258055	0.246183	1589	0	19642.6	20765.1	20203.8	18173	17087.8	17630.4
Megf11	9.18694	0.357322	0.0258937	0.246817	1590	0	523.905	505.985	514.945	650.777	668.56	659.668
Psmc6	11.2054	0.259921	0.0259045	0.246817	1591	0	2017.31	2298.54	2157.93	2490.58	2677.28	2583.93
Vwf	8.92824	-0.434496	0.0259305	0.24691	1592	0	641.922	490.729	566.325	438.491	399.616	419.054
Astn2	10.1783	0.313145	0.0260595	0.247983	1593	0	1033.47	1045.66	1039.57	1426.84	1156.3	1291.57
AI450353	5.90135	1.00664	0.0260798	0.24802	1594	0	43.0154	41.3179	42.1666	66.1217	103.323	84.7223
Yju2	7.73474	-0.542927	0.0262401	0.249387	1595	0	245.96	268.248	257.104	175.165	177.776	176.47
Pip4k2b	12.8659	-0.217748	0.0262897	0.249703	1596	0	7604.9	8494.95	8049.93	7128.38	6715.98	6922.18
1500009C09Rik	12.3873	-0.295121	0.02634	0.250024	1597	0	6854.89	5013.45	5934.17	5017.13	4655.61	4836.37
Urgcp	10.3738	-0.283146	0.0264001	0.250438	1598	0	1398.55	1528.76	1463.66	1249.35	1156.3	1202.83
Mapk8ip2	12.605	-0.23488	0.0265523	0.251715	1599	0	6251.57	7264.95	6758.26	5982.28	5503.46	5742.87
5730409E04Rik	11.8618	0.27087	0.0265844	0.251715	1600	0	3015.49	3761.2	3388.34	4275.87	3900.44	4088.15
Fyco1	10.7186	0.258814	0.0265865	0.251715	1601	0	1495.61	1585.33	1540.47	1818.93	1867.41	1843.17
Inpp5e	8.89292	0.39325	0.0266012	0.251715	1602	0	399.271	430.341	414.806	524.334	565.237	544.785
Notch3	8.89063	-0.385716	0.026784	0.253286	1603	0	545.964	539.039	542.502	414.131	416.33	415.231
Papola	11.6608	0.222972	0.0268238	0.253505	1604	0	2932.77	3061.34	2997.05	3534.61	3461.32	3497.96
Snf8	10.8337	-0.282276	0.0268644	0.253717	1605	0	2197.09	1828.16	2012.62	1670.44	1639.49	1654.97
Lgmn	11.5409	-0.24062	0.0268797	0.253717	1606	0	3152.26	3325.13	3238.69	2574.11	2908.23	2741.17
Mtx3	10.7157	0.261638	0.0269334	0.254066	1607	0	1543.04	1528.76	1535.9	1757.45	1925.15	1841.3
Xkrx	8.04069	-0.515936	0.0270845	0.255332	1608	0	317.652	312.109	314.88	245.926	194.49	220.208
Rnf214	10.8668	0.254135	0.0271055	0.255372	1609	0	1644.51	1775.4	1709.95	2072.97	2005.68	2039.33
Dtx1	9.93269	-0.305664	0.0271287	0.255431	1610	0	1105.16	1067.91	1086.54	828.261	929.906	879.084
Ina	11.7199	0.231739	0.0272924	0.256813	1611	0	2973.58	3252.03	3112.8	3554.33	3756.09	3655.21
Ak5	10.1667	0.318285	0.0273684	0.257368	1612	0	929.794	1128.93	1029.36	1346.79	1220.12	1283.46
Cct5	12.4118	-0.212962	0.0274577	0.257945	1613	0	6107.08	5625.59	5866.33	4997.41	5125.12	5061.26
U2af2	10.717	-0.289794	0.0274638	0.257945	1614	0	1930.18	1791.92	1861.05	1668.12	1376.62	1522.37
Cd83	6.86986	0.849575	0.0275161	0.25813	1615	0	82.7219	91.5349	87.1284	99.7626	214.243	157.003
Swi5	12.5941	-0.240114	0.0275175	0.25813	1616	0	7297.17	6142.38	6719.78	5895.27	5483.71	5689.49
Rnf40	10.4636	-0.285008	0.0275685	0.258171	1617	0	1506.64	1610.76	1558.7	1368.84	1189.73	1279.28
Dhx30	11.4977	-0.233399	0.0275724	0.258171	1618	0	3110.34	3160.5	3135.42	2787.55	2546.6	2667.08
2810459M11Rik	7.99846	-0.508597	0.027573	0.258171	1619	0	301.108	308.93	305.019	190.245	238.554	214.4
Bean1	7.79525	-0.557467	0.0276734	0.258951	1620	0	271.328	267.613	269.47	151.964	214.243	183.103
Sstr3	7.42905	0.669966	0.0277151	0.259182	1621	0	121.325	151.923	136.624	269.127	165.62	217.374
Med28	10.356	-0.275829	0.0277794	0.259623	1622	0	1490.1	1394	1442.05	1168.15	1214.04	1191.1
Alx4	3.63764	1.95598	0.027798	0.259637	1623	0	8.82367	3.81396	6.31881	23.2006	25.8307	24.5157
Tigd5	6.24783	-0.902095	0.0278597	0.260052	1624	0	121.325	86.4497	103.888	58.0015	53.1809	55.5912
Dpy19l3	11.1863	-0.239081	0.027883	0.26011	1625	0	2522.47	2540.73	2531.6	2057.89	2232.08	2144.99
Hadh	9.31319	-0.344689	0.0279314	0.260233	1626	0	689.349	744.357	716.853	563.775	565.237	564.506
Commd1	9.17414	-0.360637	0.0279318	0.260233	1627	0	680.525	628.667	654.596	499.973	519.653	509.813
Stxbp3	9.19666	0.359543	0.0279477	0.260233	1628	0	508.464	527.597	518.031	633.376	695.91	664.643
Cxcl12	11.4111	-0.240602	0.0280114	0.260611	1629	0	2834.6	3085.49	2960.05	2389.66	2621.06	2505.36
Cox4i2	6.28649	-0.910705	0.0280226	0.260611	1630	0	130.149	83.907	107.028	59.1615	54.7003	56.9309
Trim23	11.4419	0.235409	0.0280646	0.260841	1631	0	2456.29	2671.68	2563.98	2956.92	3079.93	3018.42
Mark2	11.6218	-0.235911	0.0281093	0.260911	1632	0	3287.92	3552.06	3419.99	3042.76	2765.41	2904.08
Rps28	6.57913	-0.831096	0.0281149	0.260911	1633	0	111.399	143.659	127.529	52.2014	91.1672	71.6843
Mal2	12.3989	0.245194	0.0281359	0.260911	1634	0	4749.34	5171.72	4960.53	6419.61	5339.36	5879.48
Rab4b	9.02426	-0.389137	0.028141	0.260911	1635	0	554.788	636.931	595.859	486.053	423.928	454.99
Rapgef4	13.7821	-0.215721	0.0281711	0.261031	1636	0	14329.6	16031.3	15180.5	13744	12400.3	13072.1
Mex3d	8.33059	-0.482875	0.0282943	0.261887	1637	0	414.712	346.434	380.573	296.968	247.671	272.319
Fkbp4	11.4888	-0.253963	0.0282981	0.261887	1638	0	2893.06	3383.61	3138.34	2510.31	2753.25	2631.78
Jade2	11.2949	-0.232327	0.0283335	0.262055	1639	0	2757.4	2688.84	2723.12	2367.62	2268.54	2318.08
Gpr139	9.66366	0.455007	0.0284046	0.262552	1640	0	513.979	871.489	692.734	1005.75	893.439	949.592
Tbcc	8.10444	-0.517356	0.0285461	0.263655	1641	0	279.049	379.489	329.269	241.286	218.801	230.044
Pigbos1	7.00909	-0.671023	0.0285587	0.263655	1642	0	156.62	168.45	162.535	96.2825	107.881	102.082
Gng5	7.36872	-0.607039	0.0286513	0.264349	1643	0	184.194	223.752	203.973	131.083	136.751	133.917
Rnf5	10.5472	-0.271085	0.0286962	0.264602	1644	0	1541.94	1745.52	1643.73	1353.76	1370.55	1362.15
Cyp2d22	10.0461	-0.340574	0.0287271	0.264725	1645	0	1335.68	1043.75	1189.72	987.186	891.919	939.552
St8sia1	9.344	0.366968	0.028795	0.26519	1646	0	593.392	551.117	572.254	660.057	815.947	738.002
Eml2	11.6945	-0.296003	0.0289108	0.266095	1647	0	3790.87	3553.97	3672.42	3446.45	2535.97	2991.21
Plekhm2	10.9322	-0.249093	0.0289498	0.266293	1648	0	2030.55	2229.89	2130.22	1793.41	1791.44	1792.42
Rpl35a	10.4247	-0.821601	0.0289907	0.266507	1649	0	2184.96	1469.64	1827.3	853.782	1214.04	1033.91
Ube2i	8.66613	-0.410106	0.0290091	0.266515	1650	0	440.08	496.45	468.265	353.809	350.994	352.401
Akap8	11.7894	0.220974	0.029044	0.266674	1651	0	3339.76	3217.71	3278.73	3967.3	3675.56	3821.43
Mprip	13.1838	-0.196266	0.0291072	0.267048	1652	0	10052.4	9867.98	9960.17	8961.23	8425.37	8693.3
Yjefn3	5.7351	-1.0751	0.0291201	0.267048	1653	0	73.8982	80.7287	77.3135	47.5612	25.8307	36.696
Cramp1l	9.72439	0.314912	0.0292003	0.267622	1654	0	806.263	710.667	758.465	937.304	949.658	943.481
Eif3d	11.0802	-0.25943	0.0292457	0.267876	1655	0	2412.17	2325.24	2368.71	2129.82	1827.9	1978.86
Clasp2	13.0074	0.199617	0.0292764	0.267996	1656	0	7525.49	7842.13	7683.81	8558.7	9089.37	8824.04
Zer1	11.6895	-0.235321	0.0293977	0.268809	1657	0	3477.63	3689.37	3583.5	3227.2	2861.13	3044.17
Eif3l	11.1143	-0.238765	0.0294007	0.268809	1658	0	2482.76	2333.51	2408.13	2048.61	2033.03	2040.82
Riok2	9.62919	0.314467	0.0294641	0.269195	1659	0	735.673	684.605	710.139	895.543	870.647	883.095
Elfn1	7.82675	0.551255	0.0294784	0.269195	1660	0	178.679	196.419	187.549	236.646	313.007	274.827
Gjc2	9.50117	-0.337186	0.0295127	0.269345	1661	0	784.204	844.791	814.497	595.095	694.39	644.743
Rab11a	11.4138	0.241746	0.0295362	0.269398	1662	0	2468.42	2549.63	2509.03	2780.59	3152.87	2966.73
Zfp651	10.8292	-0.263663	0.0295991	0.269689	1663	0	1907.02	2079.88	1993.45	1757.45	1563.52	1660.48
Gpr155	12.7607	0.25014	0.0296037	0.269689	1664	0	6264.8	6462.11	6363.46	8450.82	6685.6	7568.21
Ankrd34a	10.0606	-0.304083	0.0296811	0.270232	1665	0	1085.31	1287.85	1186.58	951.225	970.931	961.078
Tmem25	8.89556	0.385813	0.0297259	0.270477	1666	0	416.918	416.357	416.638	585.815	502.939	544.377
Insr	10.7548	0.249037	0.0298514	0.271294	1667	0	1599.29	1570.71	1585	1842.13	1925.15	1883.64
Tmem256	10.4145	-0.270264	0.0298515	0.271294	1668	0	1557.38	1440.4	1498.89	1241.23	1244.43	1242.83
Rrp12	9.97882	-0.292016	0.0298887	0.27147	1669	0	1074.28	1158.81	1116.54	915.264	908.633	911.948
Napb	12.525	0.247058	0.0299208	0.271553	1670	0	4872.87	5947.86	5410.37	6695.69	6146.19	6420.94
Fam53b	9.4887	-0.353882	0.0299338	0.271553	1671	0	752.218	872.125	812.171	689.058	581.951	635.504
Dusp22	9.17424	0.36115	0.029967	0.271602	1672	0	491.92	527.597	509.758	697.178	612.34	654.759
Rpgr	9.8415	0.298427	0.0299749	0.271602	1673	0	853.69	800.931	827.31	1009.23	1025.63	1017.43
Nrgn	14.775	-0.601776	0.0300528	0.272145	1674	0	31844.6	37229.3	34537	26759.6	18756.1	22757.9
Hlcs	8.67036	0.401633	0.0301147	0.272487	1675	0	348.535	360.419	354.477	483.733	452.797	468.265
Tspan17	8.47212	0.444474	0.0301265	0.272487	1676	0	275.74	333.085	304.413	410.651	417.85	414.25
Dtl	7.231	0.700058	0.0301474	0.272513	1677	0	104.781	130.946	117.863	240.126	142.829	191.477
Slc26a8	4.51134	1.48949	0.0301785	0.272632	1678	0	13.2355	13.9845	13.61	47.5612	28.8696	38.2154
Ubr7	10.1889	-0.289845	0.0302057	0.272714	1679	0	1292.67	1288.48	1290.57	1125.23	986.125	1055.68
Mpp3	10.5251	-0.29233	0.030316	0.273548	1680	0	1787.9	1473.46	1630.68	1354.92	1308.25	1331.58
Opcml	12.2691	0.214937	0.030446	0.274557	1681	0	4431.69	4731.21	4581.45	5535.66	5099.29	5317.47
Pigs	9.72649	-0.318606	0.0304909	0.274688	1682	0	880.161	1011.97	946.065	777.22	739.974	758.597
Ywhaz	14.1024	0.238745	0.0305195	0.274688	1683	0	17816.1	14568.7	16192.4	18011.8	20201.1	19106.5
Ascl1	6.70414	-0.757633	0.0305365	0.274688	1684	0	143.385	127.768	135.576	90.4823	69.8949	80.1886
Unc13b	8.80166	0.459403	0.0305938	0.274688	1685	0	419.124	341.985	380.554	624.096	422.408	523.252
Cox14	9.19622	-0.368849	0.0306001	0.274688	1686	0	627.583	705.582	666.583	556.814	475.589	516.202
Slc16a3	6.80435	-0.710058	0.0306073	0.274688	1687	0	146.693	139.209	142.951	88.1623	86.6089	87.3856
Hps3	8.51128	0.415746	0.0306397	0.274688	1688	0	316.549	315.287	315.918	428.051	414.811	421.431
Cacnb1	12.2117	-0.225824	0.030651	0.274688	1689	0	4898.24	5361.15	5129.69	4630.84	4142.03	4386.44
Tbx15	3.3902	2.09849	0.0306685	0.274688	1690	0	4.41183	5.72093	5.06638	26.6807	16.714	21.6973
Mir3064	8.12364	0.469837	0.0306737	0.274688	1691	0	247.063	226.93	236.997	348.009	308.449	328.229
Trim45	8.38317	-0.43743	0.0306755	0.274688	1692	0	393.756	383.303	388.529	271.447	302.371	286.909
Cdhr3	6.15892	-0.881111	0.0307106	0.274688	1693	0	103.678	90.2636	96.9709	47.5612	57.7392	52.6502
Smox	9.92293	-0.300686	0.0307108	0.274688	1694	0	1042.3	1112.4	1077.35	822.461	926.867	874.664
Gm38413	8.227	0.494119	0.0307174	0.274688	1695	0	290.078	214.853	252.465	392.09	319.085	355.588
Pde7a	9.56473	0.319642	0.0307806	0.274688	1696	0	658.466	697.318	677.892	870.023	822.024	846.023
Slc22a6	5.54898	1.17176	0.0307846	0.274688	1697	0	45.2213	17.1628	31.1921	85.8422	54.7003	70.2713
Man2b2	8.83792	-0.382271	0.0308202	0.274688	1698	0	505.155	539.675	522.415	394.41	407.214	400.812
Btg2	8.91062	-0.449758	0.03083	0.274688	1699	0	626.48	498.357	562.419	475.612	347.955	411.784
P3h3	8.62107	0.417284	0.0308661	0.274688	1700	0	333.093	348.341	340.717	422.251	487.745	454.998
Cactin	8.72525	-0.419848	0.030867	0.274688	1701	0	453.316	525.69	489.503	399.05	332.76	365.905
Atp6v0a1	13.2994	-0.22389	0.0308703	0.274688	1702	0	10312.7	11476.2	10894.4	9991.34	8665.44	9328.39
Rfx5	9.05222	0.361627	0.0308723	0.274688	1703	0	459.934	476.745	468.339	588.135	615.379	601.757
Sec61a2	10.4137	0.26655	0.0308789	0.274688	1704	0	1232	1255.43	1243.72	1445.4	1546.8	1496.1
Rock1	9.97394	0.293691	0.0308954	0.274688	1705	0	912.147	904.543	908.345	1061.43	1165.42	1113.42
B3gat3	11.1534	-0.250002	0.0310014	0.2754	1706	0	2530.19	2437.75	2483.97	2229.58	1947.94	2088.76
Eif5	12.449	0.211573	0.0310185	0.2754	1707	0	5076.92	5315.38	5196.15	5738.67	6295.1	6016.88
Myh7	8.52354	-0.498071	0.03103	0.2754	1708	0	520.596	354.062	437.329	330.609	288.696	309.652
Trim12c	7.01872	0.697076	0.0311132	0.275977	1709	0	98.1633	105.519	101.841	135.724	194.49	165.107
Guk1	10.0868	-0.281555	0.0311865	0.276305	1710	0	1209.95	1188.05	1199	1003.43	969.411	986.419
Slc35a4	10.1674	-0.290221	0.0311866	0.276305	1711	0	1286.05	1257.33	1271.69	1108.99	970.931	1039.96
Mcc	8.40149	0.469265	0.031214	0.276357	1712	0	298.902	275.876	287.389	339.889	455.836	397.862
Med7	8.73514	0.396363	0.031229	0.276357	1713	0	359.564	383.303	371.434	473.292	504.459	488.875
Kctd16	12.1653	0.212479	0.031332	0.277108	1714	0	4388.67	4145.77	4267.22	5134.29	4754.37	4944.33
Faah	9.30138	0.440716	0.031352	0.277122	1715	0	520.596	562.559	541.577	909.464	560.678	735.071
Smyd2	8.72282	0.400695	0.0314614	0.277927	1716	0	391.55	343.892	367.721	515.053	455.836	485.445
Borcs8	9.43841	-0.327083	0.0314882	0.277969	1717	0	778.689	775.504	777.097	635.696	603.223	619.46
Tspyl1	12.8857	-0.204864	0.0315028	0.277969	1718	0	7701.96	8547.71	8124.84	7087.78	7010.76	7049.27
Tmem234	9.71605	-0.346764	0.0315571	0.278286	1719	0	990.457	906.45	948.454	835.222	656.404	745.813
H1f0	11.9195	0.216634	0.0316002	0.278504	1720	0	3754.47	3432.56	3593.52	4127.39	4224.08	4175.73
Cpt1c	11.1021	-0.241523	0.0316636	0.278901	1721	0	2393.42	2386.9	2390.16	2122.86	1920.59	2021.72
Tmem100	9.08225	0.383475	0.0317467	0.27947	1722	0	486.405	462.76	474.582	549.854	688.312	619.083
Ckap2l	6.24011	-0.851667	0.0317982	0.279761	1723	0	93.7515	109.333	101.542	48.7213	63.817	56.2692
Camta1	12.5703	0.226925	0.0318631	0.28017	1724	0	5243.47	5999.99	5621.73	6261.84	6896.8	6579.32
Def8	10.4642	-0.273698	0.0319008	0.280339	1725	0	1516.57	1589.78	1553.18	1367.68	1201.89	1284.78
Gatd3a	10.2214	-0.301293	0.0321525	0.282256	1726	0	1408.48	1242.08	1325.28	1154.23	996.762	1075.5
Cdk5rap3	9.20538	-0.378568	0.0321562	0.282256	1727	0	683.834	662.357	673.096	581.175	454.317	517.746
Sra1	10.2415	-0.275867	0.0322202	0.282654	1728	0	1282.74	1381.29	1332.01	1132.19	1068.18	1100.18
Fastk	10.4232	-0.288338	0.0322628	0.282864	1729	0	1602.6	1432.14	1517.37	1331.71	1153.27	1242.49
Ssr2	10.7888	-0.253193	0.0323688	0.283629	1730	0	2025.03	1837.69	1931.36	1593.88	1647.09	1620.48
Fam234a	9.4972	-0.325954	0.0324117	0.28374	1731	0	800.748	817.458	809.103	678.618	612.34	645.479
Acy1	9.87389	-0.291332	0.0324188	0.28374	1732	0	1033.47	1042.48	1037.98	856.102	840.258	848.18
Cap2	13.2644	-0.188013	0.0324526	0.283871	1733	0	10437.3	10567.8	10502.6	9400.88	9037.71	9219.3
Zfp768	7.12755	-0.668736	0.0325932	0.284857	1734	0	188.606	164	176.303	127.603	94.2061	110.905
Izumo4	9.32897	0.369241	0.0326215	0.284857	1735	0	635.304	496.45	565.877	784.18	677.676	730.928
Plekha8	8.97175	0.362718	0.0326216	0.284857	1736	0	457.728	427.799	442.763	571.895	566.756	569.326
Arl8b	12.6709	0.194843	0.0327436	0.285549	1737	0	6111.49	6078.81	6095.15	6826.78	7126.24	6976.51
Tmem101	9.61828	-0.313369	0.0327475	0.285549	1738	0	851.484	900.729	876.107	671.657	738.454	705.056
Mctp2	4.16405	1.60394	0.032793	0.285549	1739	0	11.0296	9.53489	10.2822	33.6409	28.8696	31.2552
Ptpn12	10.3293	0.263569	0.0327938	0.285549	1740	0	1188.99	1159.44	1174.22	1390.88	1428.29	1409.58
Syap1	9.88951	0.288669	0.0327951	0.285549	1741	0	856.999	859.411	858.205	1064.91	1031.71	1048.31
Atcay	12.2357	-0.210081	0.0328731	0.285921	1742	0	5161.85	5212.41	5187.13	4691.16	4277.26	4484.21
Gdi1	13.706	0.205264	0.0328756	0.285921	1743	0	11773	13119.4	12446.2	14941.2	13757.1	14349.2
Lmf2	8.45288	-0.441093	0.0329426	0.28634	1744	0	363.976	452.589	408.283	309.728	291.735	300.732
Ptpmt1	9.35641	-0.364847	0.0330127	0.286785	1745	0	827.219	660.45	743.834	586.975	568.276	577.625
Gabarap	12.4586	-0.213703	0.0330625	0.287053	1746	0	6418.12	5704.41	6061.26	5155.17	5298.33	5226.75
Smad1	9.32751	0.339845	0.0331114	0.287313	1747	0	566.921	575.272	571.096	679.778	765.805	722.791
Dnttip2	9.68086	0.326501	0.03316	0.28757	1748	0	673.908	792.032	732.97	888.583	949.658	919.121
Gcn1	9.99743	-0.28238	0.0332118	0.287854	1749	0	1129.43	1125.12	1127.27	907.144	946.62	926.882
Ilrun	12.9347	-0.212534	0.0333843	0.289184	1750	0	7906.01	8949.45	8427.73	7529.76	7016.84	7273.3
Herc4	9.58713	0.315096	0.0334125	0.28924	1751	0	692.658	686.512	689.585	817.821	897.997	857.909
Ppfia3	11.2343	-0.273503	0.0334584	0.28924	1752	0	2494.89	2802.62	2648.76	2425.62	1957.06	2191.34
Tasor2	9.81097	0.311349	0.0334634	0.28924	1753	0	844.866	767.876	806.371	931.504	1069.7	1000.6
Gpr137	11.1893	-0.262702	0.0334671	0.28924	1754	0	2429.82	2685.66	2557.74	2323.54	1940.34	2131.94
Fdx2	4.50395	-1.66997	0.0335031	0.289304	1755	0	48.5302	32.4186	40.4744	20.8805	4.55836	12.7195
Polr2f	9.43606	-0.353724	0.0335126	0.289304	1756	0	821.704	744.357	783.031	673.977	551.562	612.77
Mdh2	12.4832	-0.212249	0.033622	0.290083	1757	0	6380.62	5944.69	6162.65	5576.26	5062.82	5319.54
Plagl1	8.73122	0.445364	0.0336719	0.290116	1758	0	362.873	365.504	364.189	408.331	583.47	495.9
Casc4	11.5752	0.220832	0.0336745	0.290116	1759	0	2873.21	2779.74	2826.47	3169.2	3418.77	3293.99
9130401M01Rik	8.76286	-0.404268	0.0336832	0.290116	1760	0	515.082	484.372	499.727	411.811	343.397	377.604
Rxrb	11.0349	-0.257123	0.0337584	0.290598	1761	0	2170.62	2416.78	2293.7	2048.61	1789.92	1919.26
Uck2	7.29713	-0.593836	0.0338772	0.291455	1762	0	191.915	194.512	193.213	129.923	126.115	128.019
Abcd2	10.4735	0.266068	0.0339166	0.291521	1763	0	1251.86	1341.24	1296.55	1636.8	1481.47	1559.13
Slc22a8	9.09628	0.40031	0.0339233	0.291521	1764	0	537.141	415.721	476.431	702.978	554.601	628.789
Adgrl1	14.1961	-0.208043	0.0339792	0.291811	1765	0	20237.1	20109.7	20173.4	18833.1	16095.6	17464.3
Gipc2	6.80673	0.68763	0.0339956	0.291811	1766	0	89.3396	87.0853	88.2125	151.964	132.192	142.078
Srl	7.76235	-0.514026	0.0340618	0.292032	1767	0	252.578	266.341	259.459	185.605	177.776	181.69
Lmnb2	8.87134	-0.388256	0.0340752	0.292032	1768	0	559.2	512.341	535.771	437.331	381.383	409.357
Ercc6l2	9.12147	0.376942	0.0340791	0.292032	1769	0	458.831	518.698	488.764	576.535	692.871	634.703
Ccdc97	10.5095	-0.267044	0.0342431	0.293153	1770	0	1493.41	1704.84	1599.12	1352.6	1305.21	1328.9
Fkbp14	8.54699	0.418745	0.0342485	0.293153	1771	0	308.828	338.171	323.5	406.011	458.875	432.443
Dscam	9.23584	0.358799	0.0343812	0.293872	1772	0	486.405	578.45	532.427	663.537	701.988	682.762
BC004004	10.5926	-0.292727	0.0344033	0.293872	1773	0	1890.47	1527.49	1708.98	1454.68	1335.6	1395.14
Ddb1	13.0662	-0.189774	0.0344058	0.293872	1774	0	9024.41	9294.61	9159.51	8217.65	7843.42	8030.54
Rhot2	11.4872	-0.23933	0.0344101	0.293872	1775	0	3205.2	3032.73	3118.96	2830.47	2453.92	2642.2
Rhbdl1	9.24528	-0.37446	0.0345113	0.29457	1776	0	736.776	645.194	690.985	590.455	475.589	533.022
Myl12a	9.02021	-0.364358	0.0346457	0.295415	1777	0	572.436	605.783	589.109	483.733	431.525	457.629
Chchd6	9.59004	-0.307317	0.0346586	0.295415	1778	0	839.351	875.303	857.327	686.738	698.949	692.843
Tcp1	12.5244	-0.20201	0.0346772	0.295415	1779	0	6196.42	6440.5	6318.46	5266.54	5719.22	5492.88
Vcl	10.4331	0.258457	0.0346882	0.295415	1780	0	1273.92	1254.16	1264.04	1465.12	1558.96	1512.04
Pfas	9.17851	0.361094	0.0347588	0.29585	1781	0	563.612	458.946	511.279	635.696	677.676	656.686
Actl6b	11.7377	-0.24952	0.0347926	0.295971	1782	0	3456.67	3990.67	3723.67	3374.53	2890	3132.26
Nvl	10.3244	0.271363	0.0349205	0.296772	1783	0	1177.96	1156.26	1167.11	1499.92	1317.37	1408.64
Snd1	11.1781	-0.232632	0.0349259	0.296772	1784	0	2539.01	2484.16	2511.58	2228.42	2046.7	2137.56
Cers6	10.2154	0.269831	0.0349569	0.296869	1785	0	1058.84	1106.68	1082.76	1342.15	1268.74	1305.45
Naa30	10.6217	0.260654	0.0349985	0.297056	1786	0	1436.05	1442.95	1439.5	1613.6	1835.5	1724.55
Dhx36	11.5321	0.216335	0.035038	0.297179	1787	0	2719.9	2775.29	2747.59	3115.84	3268.34	3192.09
Igflr1	7.70336	0.521843	0.0350522	0.297179	1788	0	165.444	182.434	173.939	256.367	243.113	249.74
Stra6	7.69003	-0.610067	0.0351966	0.298237	1789	0	188.606	321.644	255.125	151.964	182.334	167.149
Pllp	10.4248	-0.270201	0.0352444	0.298396	1790	0	1451.49	1567.54	1509.51	1169.31	1334.08	1251.7
Mypop	9.36325	-0.33607	0.0352575	0.298396	1791	0	694.864	785.039	739.952	610.176	562.198	586.187
Them6	9.69079	-0.357606	0.0352744	0.298396	1792	0	897.808	973.194	935.501	843.342	616.898	730.12
Snrnp35	9.43783	-0.33774	0.035333	0.298553	1793	0	774.277	785.039	779.658	671.657	562.198	616.928
Cops6	11.54	-0.218478	0.0353464	0.298553	1794	0	3318.8	3105.2	3212	2777.11	2744.13	2760.62
Rnaseh2c	7.14513	-0.640624	0.0353846	0.298553	1795	0	162.135	191.333	176.734	126.443	100.284	113.364
Gpatch8	11.3285	0.246945	0.0353875	0.298553	1796	0	2569.89	2151.71	2360.8	2851.35	2751.73	2801.54
Scg5	13.4853	0.203033	0.0353915	0.298553	1797	0	10822.2	10555.1	10688.7	13122.3	11485.5	12303.9
Mfsd1	9.48697	0.322111	0.0354391	0.298789	1798	0	631.995	651.551	641.773	759.82	844.816	802.318
Aard	5.67699	0.994169	0.0354675	0.298862	1799	0	33.0888	39.4109	36.2498	68.4418	75.9727	72.2072
Gmppb	8.59468	-0.427561	0.0356336	0.300094	1800	0	472.066	424.62	448.343	368.89	297.813	333.351
Nectin3	7.69864	0.538737	0.0356799	0.300161	1801	0	181.988	162.729	172.358	286.527	214.243	250.385
Nae1	10.1681	0.267267	0.0356876	0.300161	1802	0	1046.71	1050.74	1048.73	1258.63	1265.7	1262.17
Mpped2	10.9994	-0.234395	0.0357009	0.300161	1803	0	2152.98	2287.74	2220.36	1837.49	1937.3	1887.4
Doc2a	7.77101	0.525748	0.0357484	0.300394	1804	0	184.194	179.892	182.043	299.288	224.879	262.083
Tmem176a	8.79546	-0.392233	0.0357976	0.300507	1805	0	497.434	520.605	509.02	345.689	430.005	387.847
Gm15246	7.02058	0.663943	0.0358015	0.300507	1806	0	89.3396	116.961	103.15	161.244	165.62	163.432
Sap30bp	10.3375	-0.258961	0.0358373	0.300641	1807	0	1389.73	1441.04	1415.38	1177.43	1188.21	1182.82
Mfsd13a	9.30185	-0.382343	0.0358665	0.300719	1808	0	690.452	750.714	720.583	639.177	466.472	552.824
Ldhb	13.0706	-0.196881	0.0359806	0.301421	1809	0	9034.33	9386.78	9210.56	8405.58	7665.64	8035.61
Dnase1l2	7.16862	0.643176	0.03599	0.301421	1810	0	132.355	97.8915	115.123	207.645	151.945	179.795
Cd37	6.89308	-0.678652	0.0360166	0.301477	1811	0	157.723	143.023	150.373	99.7626	88.1283	93.9454
Slc12a6	11.6108	0.211482	0.0360545	0.301628	1812	0	2856.66	2956.45	2906.56	3345.53	3385.34	3365.43
Anp32e	12.6394	-0.208493	0.0360772	0.301639	1813	0	6478.78	7237.62	6858.2	6122.64	5748.09	5935.37
Ncdn	14.7129	-0.216643	0.0360957	0.301639	1814	0	26403.7	31493.7	28948.7	25966.1	23858.5	24912.3
Polrmt	8.73164	-0.417851	0.0361285	0.301747	1815	0	433.463	549.21	491.336	396.73	338.838	367.784
Fhod3	8.30911	0.512585	0.036162	0.301852	1816	0	222.798	308.295	265.546	443.131	314.527	378.829
Sox2ot	10.3427	0.330656	0.0361808	0.301852	1817	0	1080.9	1235.09	1157.99	1236.59	1675.96	1456.27
Cebpd	4.48441	-1.48105	0.0362239	0.301879	1818	0	43.0154	31.783	37.3992	11.6003	15.1945	13.3974
Tecpr1	11.2471	-0.235174	0.0362239	0.301879	1819	0	2736.44	2537.55	2637	2339.78	2140.91	2240.35
Uimc1	8.43865	0.416974	0.0362573	0.301991	1820	0	313.24	287.318	300.279	383.97	417.85	400.91
Eif4b	12.6945	-0.191044	0.0363381	0.302369	1821	0	6997.17	7167.69	7082.43	6325.64	6082.37	6204.01
Uqcc3	9.1636	-0.341684	0.036346	0.302369	1822	0	652.951	638.202	645.577	522.014	496.861	509.437
Dclk3	11.8677	-0.20841	0.0363685	0.302369	1823	0	3875.8	4158.48	4017.14	3460.37	3493.22	3476.8
Gjb2	6.68358	0.731546	0.0363824	0.302369	1824	0	75.0012	84.5427	79.7719	116.003	148.906	132.455
Phtf2	9.06186	0.353383	0.0364645	0.302672	1825	0	451.11	494.543	472.827	612.496	595.626	604.061
Ak4	9.46674	0.358063	0.0364696	0.302672	1826	0	560.303	689.69	624.997	875.823	726.299	801.061
Ell2	9.88214	0.311876	0.0364787	0.302672	1827	0	766.556	927.427	846.992	1069.55	1033.23	1051.39
Gpsm1	10.0294	-0.299857	0.0365106	0.30277	1828	0	1256.27	1062.82	1159.55	912.944	970.931	941.937
Flywch2	7.57221	-0.659524	0.0365384	0.302835	1829	0	255.886	222.481	239.184	199.525	103.323	151.424
Trappc9	10.5003	-0.26298	0.0365955	0.303142	1830	0	1677.6	1495.71	1586.65	1331.71	1312.81	1322.26
Rflnb	9.12136	-0.358629	0.0366321	0.303261	1831	0	577.95	683.334	630.642	508.093	475.589	491.841
Grin1	11.9526	-0.267599	0.0366498	0.303261	1832	0	3841.6	4855.8	4348.7	3898.86	3326.08	3612.47
Chn1os3	7.28297	0.589948	0.0367674	0.304068	1833	0	119.12	134.76	126.94	193.725	188.412	191.069
Ift74	9.00202	0.379904	0.0368193	0.304332	1834	0	432.36	466.574	449.467	525.494	644.248	584.871
Cyp4f15	8.41127	-0.416218	0.0368431	0.304362	1835	0	381.624	404.915	393.269	294.648	294.774	294.711
Zic4	6.33394	0.957927	0.0368779	0.304484	1836	0	66.1775	49.5814	57.8795	63.8017	161.062	112.432
Pole3	8.33943	-0.439148	0.0369328	0.304568	1837	0	397.065	357.241	377.153	293.488	262.865	278.177
Cryab	11.9865	-0.219476	0.0369632	0.304568	1838	0	4169.18	4588.19	4378.69	3569.41	3952.1	3760.76
Unc45a	9.35531	-0.335508	0.036975	0.304568	1839	0	675.011	796.481	735.746	581.175	584.99	583.082
Arhgef19	7.68014	-0.580576	0.0369878	0.304568	1840	0	195.224	306.388	250.806	172.844	162.582	167.713
Mrps36	5.89515	0.98404	0.0369886	0.304568	1841	0	45.2213	39.4109	42.3161	58.0015	109.401	83.7011
Magi3	9.93896	0.278976	0.0370235	0.304658	1842	0	908.838	873.396	891.117	1092.75	1069.7	1081.22
Dpp9	10.5956	-0.246412	0.0370495	0.304658	1843	0	1670.98	1699.75	1685.37	1451.2	1390.3	1420.75
Aldh16a1	6.31401	-0.826332	0.0370682	0.304658	1844	0	86.0308	125.861	105.946	55.6814	63.817	59.7492
Pnpla3	7.32891	0.590459	0.0370798	0.304658	1845	0	148.899	113.147	131.023	187.925	206.646	197.285
Pcbp1	11.2518	-0.222944	0.0373183	0.30624	1846	0	2548.94	2719.99	2634.46	2274.82	2239.67	2257.25
Ddr2	7.3833	0.593349	0.0373439	0.30624	1847	0	155.517	116.326	135.921	230.846	179.296	205.071
Kcnn4	2.71027	-2.57663	0.0373462	0.30624	1848	0	15.4414	16.5271	15.9843	2.32006	3.03891	2.67948
Dnhd1	7.00949	0.634464	0.0373532	0.30624	1849	0	102.575	104.248	103.412	155.444	165.62	160.532
Phyh	10.1844	0.289703	0.0374265	0.306675	1850	0	968.398	1136.56	1052.48	1243.55	1329.52	1286.54
Psmd3	11.2662	-0.229608	0.0375615	0.307615	1851	0	2680.19	2653.88	2667.03	2393.14	2156.1	2274.62
Gm19935	7.99253	-0.573172	0.037732	0.308844	1852	0	360.667	260.62	310.644	157.764	259.827	208.795
Inha	9.89075	0.289344	0.0377668	0.308856	1853	0	825.013	892.466	858.739	1086.95	1011.96	1049.45
Itgav	11.6189	0.216032	0.0377741	0.308856	1854	0	2848.94	2987.6	2918.27	3272.44	3506.9	3389.67
Bop1	9.86982	-0.312405	0.0378475	0.309288	1855	0	1076.49	1008.79	1042.64	921.064	758.207	839.636
Rxra	10.1606	-0.269576	0.0378759	0.309354	1856	0	1220.98	1292.3	1256.64	1004.59	1080.33	1042.46
Trpm7	10.2344	0.264826	0.0379687	0.309945	1857	0	1141.56	1056.47	1099.01	1299.23	1341.68	1320.46
Ranbp9	10.7405	0.246693	0.0380228	0.310219	1858	0	1524.29	1617.12	1570.7	1789.93	1937.3	1863.61
Ttc9b	8.99291	-0.429377	0.0380935	0.31052	1859	0	594.495	587.985	591.24	530.134	347.955	439.044
Pex7	9.16558	0.336374	0.0381006	0.31052	1860	0	499.64	522.512	511.076	655.417	635.132	645.274
Atf7ip	9.51823	-0.342514	0.0381592	0.31083	1861	0	783.101	868.311	825.706	725.019	577.392	651.206
Zfp64	8.02111	-0.47838	0.0382244	0.311194	1862	0	280.151	333.085	306.618	232.006	208.165	220.086
Crls1	9.52541	0.305537	0.0382656	0.311362	1863	0	671.702	654.093	662.898	807.381	831.141	819.261
Adarb2	8.24562	0.464698	0.038377	0.312032	1864	0	266.916	249.814	258.365	307.408	405.694	356.551
Atraid	10.6717	-0.25956	0.038389	0.312032	1865	0	1913.63	1655.89	1784.76	1479.04	1502.74	1490.89
Rxfp3	3.82181	1.8203	0.0384397	0.312276	1866	0	5.51479	9.53489	7.52484	19.7205	33.428	26.5742
Capn7	10.2551	0.259318	0.0384664	0.312326	1867	0	1130.53	1103.5	1117.02	1320.11	1353.83	1336.97
Cdkn1c	6.60871	-0.743455	0.038512	0.312493	1868	0	106.987	145.566	126.276	67.2817	83.5699	75.4258
Ankrd16	8.75328	0.373072	0.0385282	0.312493	1869	0	387.138	371.225	379.182	508.093	474.07	491.081
Rptor	10.2036	-0.270476	0.0386323	0.313169	1870	0	1258.48	1331.71	1295.09	1121.75	1025.63	1073.69
Cmtr1	5.73303	-1.02571	0.0387145	0.313588	1871	0	71.6923	80.0931	75.8927	48.7213	25.8307	37.276
Slc35d3	10.6104	-0.255586	0.0387442	0.313588	1872	0	1763.63	1652.71	1708.17	1346.79	1514.9	1430.85
Trim17	8.08027	0.459442	0.0387548	0.313588	1873	0	244.857	216.76	230.808	300.448	334.28	317.364
Tssc4	9.79132	-0.287555	0.0387667	0.313588	1874	0	973.912	984.001	978.957	815.501	788.596	802.049
Sec61a1	10.9322	-0.228493	0.0388002	0.313692	1875	0	2087.9	2142.17	2115.04	1803.85	1806.63	1805.24
Oaf	7.99553	-0.482255	0.0389106	0.314417	1876	0	312.137	291.132	301.635	234.326	197.529	215.928
Blvrb	7.30037	-0.582326	0.0389324	0.314425	1877	0	196.327	189.426	192.877	134.563	123.076	128.82
Npr2	9.35862	0.330726	0.0389708	0.314568	1878	0	550.376	620.404	585.39	715.739	756.688	736.213
Phlda1	8.8697	-0.366778	0.0390173	0.314776	1879	0	515.082	547.303	531.192	386.29	437.603	411.946
Mrpl18	9.81916	-0.28674	0.0390566	0.314925	1880	0	965.089	1030.4	997.746	825.941	809.869	817.905
1810013L24Rik	10.7205	0.238204	0.0391035	0.315136	1881	0	1544.14	1563.09	1553.61	1882.73	1782.32	1832.52
1700030J22Rik	8.0621	-0.498381	0.0391843	0.315611	1882	0	264.71	370.589	317.65	235.486	214.243	224.865
Tmem161b	9.70794	0.295565	0.0392041	0.315611	1883	0	727.953	781.861	754.907	933.824	919.269	926.547
Oscp1	10.2955	0.269926	0.0392664	0.315945	1884	0	1224.28	1064.73	1144.51	1351.44	1408.53	1379.98
Fndc1	8.29045	0.535364	0.039313	0.316152	1885	0	331.991	188.155	260.073	421.091	332.76	376.926
Rasal2	10.6489	0.25356	0.0393371	0.316178	1886	0	1404.07	1537.02	1470.55	1836.33	1669.88	1753.1
Wwc2	10.3697	-0.265836	0.0396125	0.318047	1887	0	1388.62	1512.87	1450.75	1269.07	1144.15	1206.61
Smpd4	10.0878	0.267615	0.0396188	0.318047	1888	0	1021.34	962.388	991.864	1198.31	1189.73	1194.02
Tmed3	9.15594	-0.341894	0.0396525	0.318047	1889	0	643.025	641.38	642.203	534.774	478.628	506.701
Gm1673	6.1454	-0.839772	0.0396535	0.318047	1890	0	95.9574	93.4419	94.6997	55.6814	50.142	52.9117
Arhgef25	10.4645	0.2947	0.0397024	0.31827	1891	0	1195.61	1355.86	1275.73	1747.01	1382.7	1564.85
Mphosph10	9.07008	0.343878	0.0397694	0.318639	1892	0	474.272	479.923	477.097	583.495	627.534	605.515
Ruvbl2	9.08172	-0.396464	0.0399381	0.319485	1893	0	637.51	605.783	621.647	551.014	393.538	472.276
Tmem246	10.4515	-0.251102	0.0399382	0.319485	1894	0	1526.49	1528.76	1527.63	1233.11	1334.08	1283.6
Trappc6a	7.14957	-0.653038	0.0399498	0.319485	1895	0	153.311	202.775	178.043	132.243	94.2061	113.225
Wdr18	10.0613	-0.287894	0.0400019	0.319485	1896	0	1243.03	1118.12	1180.58	1020.83	913.192	967.009
Slc9a3r1	9.68401	-0.309153	0.0400065	0.319485	1897	0	979.427	851.784	915.605	751.699	726.299	738.999
Ppp1r13b	10.7795	-0.233325	0.0400106	0.319485	1898	0	1919.15	1892.36	1905.75	1628.68	1613.66	1621.17
Cdc42se2	12.1443	-0.214214	0.0400226	0.319485	1899	0	4876.18	4875.51	4875.84	4490.48	3915.63	4203.05
Pard3	10.4166	-0.261221	0.0400619	0.31963	1900	0	1570.61	1421.97	1496.29	1278.35	1218.6	1248.48
Bub3	10.7583	-0.245506	0.0401901	0.320272	1901	0	1975.4	1796.37	1885.89	1628.68	1552.88	1590.78
Ptk2b	13.5392	-0.183601	0.040196	0.320272	1902	0	12735.9	12636.9	12686.4	11592.2	10748.6	11170.4
Ddah1	11.8456	0.217145	0.0402057	0.320272	1903	0	3368.44	3458.62	3413.53	3722.54	4213.44	3967.99
Zfp963	7.75544	0.499944	0.0402652	0.320578	1904	0	188.606	174.806	181.706	278.407	235.515	256.961
Zscan30	7.32602	0.568033	0.0403012	0.320696	1905	0	138.973	124.589	131.781	185.605	205.126	195.366
Dnaja1	11.5923	0.216288	0.0403445	0.320872	1906	0	2807.03	2922.13	2864.58	3180.8	3474.99	3327.9
Slc22a17	13.9146	-0.181065	0.0403806	0.320991	1907	0	15954.3	16931.4	16442.9	14862.3	14144.6	14503.4
Psmb2	10.8914	-0.231634	0.0405479	0.322151	1908	0	2091.21	2025.21	2058.21	1793.41	1712.42	1752.92
Deptor	9.65221	0.325952	0.0406355	0.322679	1909	0	648.54	788.853	718.696	952.385	849.375	900.88
Cdkn2aip	9.02707	0.341884	0.040704	0.322701	1910	0	462.14	464.667	463.403	588.135	586.509	587.322
Mepce	10.7588	-0.245958	0.040714	0.322701	1911	0	1862.9	1910.79	1886.84	1685.52	1496.66	1591.09
Spr	8.77103	-0.36796	0.0407198	0.322701	1912	0	485.302	507.256	496.279	381.65	387.461	384.555
Gbp7	7.57862	0.544712	0.0407235	0.322701	1913	0	150.002	166.543	158.273	206.485	255.268	230.877
Ctnnbl1	10.1155	-0.304825	0.0409386	0.324237	1914	0	1115.09	1350.78	1232.93	1079.99	916.23	998.109
B3galnt2	8.88541	0.360804	0.0411508	0.325747	1915	0	424.639	410	417.32	571.895	499.9	535.898
Slc22a4	6.64453	0.728802	0.0412254	0.326077	1916	0	72.7953	82.6357	77.7155	110.203	147.387	128.795
Wscd2	10.8821	-0.261097	0.0412509	0.326077	1917	0	1925.77	2206.37	2066.07	1857.21	1590.87	1724.04
Phb	9.14469	-0.345714	0.0412571	0.326077	1918	0	663.981	612.14	638.061	530.134	474.07	502.102
Vti1b	12.0446	-0.204377	0.0412958	0.326126	1919	0	4714.04	4355.54	4534.79	3842.02	4029.59	3935.81
Rnf112	13.2568	0.227189	0.0413063	0.326126	1920	0	8779.55	9313.68	9046.62	11737.2	9441.88	10589.5
Hnrnpl	12.1479	0.193086	0.0414959	0.327453	1921	0	4299.33	4189.63	4244.48	4801.36	4903.28	4852.32
Azin2	8.99942	-0.410248	0.0415885	0.32791	1922	0	590.083	589.892	589.987	527.814	360.11	443.962
Adamtsl5	7.73268	-0.537717	0.0415971	0.32791	1923	0	236.033	276.512	256.272	204.165	148.906	176.536
Rtkn	10.6662	-0.255234	0.0416774	0.328357	1924	0	1633.48	1917.15	1775.32	1476.72	1498.18	1487.45
Snx21	8.26304	-0.424252	0.0416971	0.328357	1925	0	359.564	352.155	355.86	264.487	265.904	265.196
Borcs5	8.65339	-0.408258	0.0417978	0.328918	1926	0	506.258	421.442	463.85	372.37	326.683	349.526
Tomm7	11.2566	-0.213944	0.0418118	0.328918	1927	0	2650.41	2619.55	2634.98	2269.02	2274.62	2271.82
Slc25a44	11.5322	-0.21969	0.0418367	0.328943	1928	0	3304.46	3087.4	3195.93	2866.43	2622.58	2744.51
Cartpt	6.03234	0.928677	0.0418997	0.329003	1929	0	36.3976	58.4807	47.4391	74.2419	106.362	90.3018
Slco4c1	4.82014	-1.29441	0.0419033	0.329003	1930	0	40.8095	47.6745	44.242	20.8805	15.1945	18.0375
Cfl1	13.7993	-0.190242	0.0419094	0.329003	1931	0	15403.9	15052.4	15228.2	14118.7	12575	13346.9
Cyp4f14	7.66244	-0.506919	0.0419937	0.329494	1932	0	233.827	249.178	241.503	168.204	171.698	169.951
Sst	10.475	-0.279209	0.0420234	0.329556	1933	0	1440.46	1695.3	1567.88	1389.72	1194.29	1292
Arhgap26	11.6059	0.205615	0.0421598	0.330204	1934	0	2856.66	2948.19	2902.43	3302.61	3391.42	3347.01
Zfp551	5.76418	-0.935914	0.0421664	0.330204	1935	0	72.7953	77.5504	75.1729	40.6011	37.9863	39.2937
Col24a1	6.13069	0.87558	0.0421897	0.330204	1936	0	55.1479	48.3101	51.729	122.963	66.856	94.9096
Adap1	11.8779	-0.226354	0.0421931	0.330204	1937	0	4011.46	4129.88	4070.67	3775.9	3183.26	3479.58
Keap1	10.9276	-0.232595	0.0422351	0.330362	1938	0	2040.47	2182.22	2111.35	1857.21	1736.74	1796.97
Pold1	6.6712	-0.71921	0.0422835	0.33057	1939	0	135.664	125.861	130.762	90.4823	68.3754	79.4289
Slc25a35	6.68708	0.72206	0.042317	0.330583	1940	0	98.1633	62.2946	80.229	146.164	118.517	132.341
Usf1	10.2491	-0.259257	0.0423624	0.330583	1941	0	1374.29	1288.48	1331.38	1117.11	1107.68	1112.4
Trmt61a	9.1092	-0.378101	0.042372	0.330583	1942	0	658.466	600.698	629.582	551.014	417.85	484.432
Fbxo46	8.33009	-0.437547	0.0423765	0.330583	1943	0	327.579	421.442	374.51	279.567	273.502	276.534
Efnb3	12.8577	-0.186484	0.0424103	0.330583	1944	0	7904.9	7931.76	7918.33	6709.61	7206.77	6958.19
Eif5a	11.8588	-0.222678	0.0424159	0.330583	1945	0	4299.33	3724.96	4012.15	3532.29	3344.32	3438.3
Kcnd3	10.2968	0.296535	0.042438	0.330584	1946	0	1173.55	1096.51	1135.03	1221.51	1566.56	1394.03
Sgsm2	11.2316	-0.234819	0.0425286	0.330751	1947	0	2685.7	2531.2	2608.45	2365.3	2067.98	2216.64
Ssbp1	8.61594	0.396886	0.0425478	0.330751	1948	0	313.24	370.589	341.915	458.212	442.161	450.186
Rcn1	12.4657	0.22409	0.0425547	0.330751	1949	0	4744.93	5722.84	5233.88	6258.36	5968.41	6113.39
Ttc27	8.78071	-0.391314	0.0425629	0.330751	1950	0	500.743	506.62	503.682	429.211	338.838	384.025
Pknox1	9.24641	-0.336445	0.0425838	0.330751	1951	0	627.583	737.365	682.474	556.814	524.211	540.513
Ddx3y	10.9838	0.321842	0.0425903	0.330751	1952	0	1539.73	2083.06	1811.39	1975.53	2552.68	2264.11
Lnpep	7.00171	-0.781542	0.0426916	0.331261	1953	0	230.518	105.519	168.019	99.7626	95.7256	97.7441
Spata2l	11.1977	-0.244899	0.0427071	0.331261	1954	0	2392.32	2721.26	2556.79	2304.98	2010.24	2157.61
Camk1g	9.86857	-0.299793	0.0427215	0.331261	1955	0	993.766	1080.62	1037.19	759.82	925.347	842.583
Krit1	10.6776	0.244259	0.042746	0.331264	1956	0	1440.46	1569.44	1504.95	1734.24	1830.94	1782.59
Mrpl21	9.04363	-0.339511	0.0427656	0.331264	1957	0	596.701	590.528	593.614	453.572	484.706	469.139
Psmb5	8.14142	-0.438459	0.0428767	0.331955	1958	0	336.402	321.008	328.705	238.966	246.151	242.559
Kcnc4	8.10932	0.56212	0.0429036	0.331994	1959	0	162.135	292.403	227.269	359.609	311.488	335.549
Grm8	7.79452	0.556353	0.0429789	0.332237	1960	0	145.591	220.574	183.082	248.246	290.216	269.231
Papss1	11.2969	-0.219851	0.0429959	0.332237	1961	0	2650.41	2779.74	2715.07	2424.46	2238.16	2331.31
Stx2	8.73092	0.377575	0.0430101	0.332237	1962	0	400.374	345.163	372.768	512.733	455.836	484.285
Acsbg1	12.1125	-0.191668	0.0430587	0.332237	1963	0	4679.85	4784.61	4732.23	4134.35	4152.67	4143.51
Nefm	13.7417	0.58747	0.0430635	0.332237	1964	0	9470	12879.1	11174.5	18957.2	14624.7	16791
Ubr4	11.7704	-0.216925	0.0430666	0.332237	1965	0	3955.21	3576.86	3766.03	3368.73	3111.84	3240.28
Hipk4	10.9163	-0.264756	0.0431448	0.332672	1966	0	2086.8	2149.8	2118.3	1962.77	1563.52	1763.14
Fam107a	13.81	0.219526	0.0431861	0.332821	1967	0	12358.7	14261	13309.8	14253.3	16741.3	15497.3
Suds3	11.4467	-0.207028	0.0432601	0.333033	1968	0	2987.91	3009.85	2998.88	2620.51	2575.47	2597.99
Spred2	10.1244	-0.330702	0.0432983	0.333033	1969	0	1085.31	1418.16	1251.73	1107.83	882.803	995.316
Fam98a	11.096	0.220578	0.0433078	0.333033	1970	0	1986.43	2069.07	2027.75	2412.86	2312.61	2362.74
Gpr27	11.4475	-0.213482	0.0433105	0.333033	1971	0	2940.49	3074.05	3007.27	2491.74	2695.51	2593.63
Clpx	9.74576	0.286639	0.0433253	0.333033	1972	0	754.424	800.295	777.359	936.144	960.295	948.219
Cry1	9.80634	-0.299569	0.0433454	0.333033	1973	0	939.721	1046.93	993.326	738.939	875.205	807.072
Syndig1	10.7974	-0.233859	0.0434038	0.333312	1974	0	1864	1995.97	1929.99	1592.72	1689.63	1641.18
Crip3	6.01524	0.893947	0.0434754	0.333693	1975	0	52.942	41.9535	47.4478	112.523	63.817	88.17
Apbb2	10.3786	0.248839	0.0435245	0.3339	1976	0	1238.62	1203.94	1221.28	1499.92	1402.46	1451.19
Lzts3	13.6035	-0.264452	0.0435636	0.334031	1977	0	11373.7	15909.3	13641.5	11767.3	10946.1	11356.7
Ccdc50	10.5914	0.240899	0.0436434	0.334466	1978	0	1451.49	1387.01	1419.25	1625.2	1729.14	1677.17
Cntn6	8.98704	0.357773	0.0436643	0.334466	1979	0	494.125	402.372	448.249	588.135	560.678	574.407
Osbpl1a	12.0559	0.256415	0.043708	0.334543	1980	0	3723.59	4068.22	3895.9	5279.3	4028.07	4653.68
Thbs3	9.53811	0.349525	0.0437265	0.334543	1981	0	719.129	598.155	658.642	958.185	720.221	839.203
Aff3	11.4119	-0.211993	0.0437406	0.334543	1982	0	2830.19	3034.64	2932.41	2553.23	2510.14	2531.68
Thop1	9.40345	-0.31388	0.0438124	0.334883	1983	0	718.026	792.032	755.029	625.256	589.548	607.402
Hfm1	6.30637	0.782749	0.0438474	0.334883	1984	0	67.2805	53.3954	60.3379	119.483	88.1283	103.806
Hspa2	9.52281	-0.300373	0.0438532	0.334883	1985	0	785.307	847.334	816.32	649.617	676.157	662.887
Cst6	6.1329	-0.874179	0.0439091	0.334883	1986	0	79.413	110.605	95.0089	62.6416	41.0252	51.8334
Trpc4	7.62833	0.627478	0.04392	0.334883	1987	0	158.826	159.55	159.188	168.204	323.644	245.924
Gopc	10.8035	0.2278	0.0439294	0.334883	1988	0	1639	1664.16	1651.58	1918.69	1949.46	1934.07
Pwp1	9.54814	-0.298576	0.0439429	0.334883	1989	0	831.631	828.9	830.265	693.698	656.404	675.051
Septin4	12.3471	-0.188883	0.0439625	0.334883	1990	0	5558.91	5566.47	5562.69	4759.6	5000.52	4880.06
2010315B03Rik	9.06299	0.344722	0.0439839	0.334883	1991	0	515.082	434.155	474.618	611.336	594.106	602.721
B4galt2	10.8259	-0.275432	0.0440994	0.335517	1992	0	2055.91	1938.13	1997.02	1854.89	1445	1649.94
Clip2	10.8756	-0.259867	0.0441177	0.335517	1993	0	1851.87	2259.77	2055.82	1785.29	1648.61	1716.95
Mfn1	10.6086	0.271542	0.0441335	0.335517	1994	0	1331.27	1510.96	1421.12	1569.52	1861.33	1715.43
Efcab2	9.10797	0.353594	0.044181	0.335709	1995	0	491.92	484.372	488.146	559.134	688.312	623.723
Fam78b	10.0775	0.268921	0.0442366	0.335964	1996	0	940.824	1027.86	984.342	1176.27	1195.81	1186.04
Rexo2	10.14	0.270965	0.0444042	0.337067	1997	0	966.192	1088.25	1027.22	1267.91	1211	1239.46
Dmac2	9.99945	-0.273163	0.0444306	0.337098	1998	0	1064.36	1186.14	1125.25	938.464	923.828	931.146
[truncated: 13,161 more rows]

## Sheet: B. significant DEGs FDR <=0.075
Significantly differentially expressed genes (DEGs) between WT and Camk2a-cKO. FDR cutoff chosen was 0.075, log2FC chosen was > |0.25|
gene_id	BaseMean	Log2FC	fold change	P Value	FDR	Rank	estimatedDEG	ST_wt2	ST_wt3	ST_wt_mean	ST_ko1	ST_ko2	ST_ko_mean
Tshz3	6.38684	-2.90338	0.0548378	1.62689e-15	3.52314e-12	7	1	228.312	229.473	228.893	23.2006	37.9863	30.5935
Gm20594	5.97289	-2.43436	0.0876538	8.77126e-08	1.74952e-05	76	1	189.709	102.341	146.025	26.6807	27.3502	27.0154
Lcn2	4.65271	-2.22922	0.107612	0.0019133	0.049923	580	1	65.0746	43.8605	54.4675	3.48009	19.7529	11.6165
4930413G21Rik	5.35728	-1.61307	0.199274	0.00285879	0.0650493	665	1	68.3834	75.0078	71.6956	30.1608	16.714	23.4374
Dnah6	8.40973	-1.32544	0.265686	1.82898e-11	1.15523e-08	24	1	545.964	530.776	538.37	216.926	212.723	214.825
Rplp2	10.41	-1.29942	0.272691	8.50608e-19	2.57887e-15	5	1	2211.43	2057.63	2134.53	992.986	741.493	867.24
Dpm3	7.71534	-1.24864	0.286894	3.77013e-07	6.01593e-05	95	1	331.991	315.923	323.957	125.283	147.387	136.335
Rplp1	13.0541	-1.22783	0.292928	1.05513e-29	9.82659e-26	1	1	13316	12717	13016.5	6114.52	5000.52	5557.52
Tpt1	7.90866	-1.22487	0.293797	3.24258e-06	0.000346157	142	1	287.872	446.869	367.37	162.404	151.945	157.175
Pigyl	8.05009	-1.22264	0.294451	3.00412e-07	5.17494e-05	88	1	412.507	397.287	404.897	204.165	142.829	173.497
Fau	8.17492	-1.22246	0.294504	8.86515e-09	2.79973e-06	48	1	445.595	437.334	441.464	196.045	182.334	189.19
Fcgr2b	6.45521	-1.21684	0.296163	0.00106621	0.032985	490	1	137.87	129.675	133.772	64.9617	50.142	57.5518
Fbl	8.50101	-1.16552	0.31176	1.10737e-07	2.07243e-05	81	1	631.995	453.225	542.61	228.526	255.268	241.897
Bola2	9.45532	-1.15988	0.313525	5.1726e-13	4.90071e-10	16	1	1109.58	989.086	1049.33	509.253	430.005	469.629
C1qtnf4	8.63627	-1.15026	0.316554	1.13198e-08	3.50199e-06	49	1	582.362	603.241	592.801	306.248	227.918	267.083
Gt(ROSA)26Sor	7.87929	-1.14491	0.318254	1.76379e-06	0.000204101	131	1	380.521	319.737	350.129	164.724	151.945	158.335
Junb	8.57998	-1.12757	0.323818	4.26334e-06	0.000439646	147	1	484.199	647.101	565.65	324.808	192.971	258.89
Mcm2	6.90987	-1.10515	0.331162	0.000551517	0.0202924	412	1	191.915	160.822	176.368	78.882	85.0894	81.9857
Rps21	11.7748	-1.10032	0.332766	1.00873e-23	5.09713e-20	3	1	5387.95	4873.6	5130.78	2535.83	2250.31	2393.07
Ddah2	8.15914	-1.0987	0.333305	2.41741e-06	0.000267486	137	1	448.904	387.752	418.328	225.046	165.62	195.333
Romo1	8.99562	-1.07391	0.341669	4.89468e-08	1.14151e-05	65	1	706.996	774.233	740.615	416.451	287.177	351.814
2410006H16Rik	7.96043	-1.05872	0.3469	1.37148e-05	0.00111776	186	1	403.683	315.287	359.485	185.605	159.543	172.574
Rps10	8.01091	-1.05783	0.347208	5.72685e-06	0.000571141	152	1	354.05	390.295	372.172	199.525	158.023	178.774
Mcm6	7.31175	-1.05142	0.349441	0.000793132	0.0264566	454	1	268.019	189.426	228.723	87.0023	133.712	110.357
Grcc10	10.2868	-1.03244	0.356138	7.05293e-15	1.33644e-11	8	1	1814.37	1758.87	1786.62	943.104	803.791	873.448
Uqcrq	10.9707	-1.01775	0.361408	1.14335e-13	1.33323e-10	13	1	2898.58	2812.79	2855.68	1611.28	1209.49	1410.38
Ndufa13	11.6232	-1.00849	0.36477	6.90558e-18	1.74469e-14	6	1	4787.94	4160.39	4474.17	2376.9	2071.02	2223.96
Rps26	9.45157	-0.997502	0.368799	4.69894e-09	1.69598e-06	42	1	1091.93	886.745	989.337	538.254	452.797	495.526
Cox17	10.2881	-0.99267	0.370586	3.2145e-11	1.87418e-08	26	1	1834.22	1693.4	1763.81	1011.55	761.246	886.396
Celsr1	7.25236	-0.985901	0.373103	0.000755891	0.0254083	450	1	232.724	196.419	214.571	95.1225	121.556	108.339
Scand1	7.19823	-0.955922	0.384457	0.00119619	0.0356248	509	1	201.841	207.225	204.533	89.3223	121.556	105.439
Sf3b5	8.16122	-0.953184	0.385512	5.66325e-05	0.00346166	248	1	369.491	427.163	398.327	241.286	170.179	205.733
Rps19	10.4055	-0.952087	0.385935	1.0142e-07	1.94612e-05	79	1	2250.04	1523.04	1886.54	1100.87	849.375	975.122
Uqcr11	10.7256	-0.932953	0.393391	2.43705e-14	3.35848e-11	11	1	2369.16	2309.99	2339.57	1314.31	1136.55	1225.43
Rex1bd	8.9477	-0.930094	0.394517	1.64738e-06	0.000196635	127	1	668.393	694.776	681.584	417.611	297.813	357.712
Mrps28	7.4167	-0.910608	0.402279	0.00100466	0.0317946	479	1	253.68	214.853	234.267	132.243	116.998	124.621
Rps8	10.2046	-0.907133	0.40368	4.17162e-08	1.01996e-05	62	1	1839.73	1392.09	1615.91	965.145	758.207	861.676
Tmem223	9.09403	-0.906986	0.403739	1.30289e-07	2.35126e-05	84	1	743.394	753.256	748.325	435.011	363.149	399.08
Ppib	9.28575	-0.900582	0.406333	5.57108e-08	1.26048e-05	67	1	823.91	881.659	852.785	498.813	414.811	456.812
Znhit1	9.63113	-0.892577	0.409599	2.33739e-09	8.85814e-07	40	1	1022.44	1138.47	1080.45	607.856	556.12	581.988
Ckb	14.0912	-0.891266	0.410136	1.4435e-14	2.43133e-11	9	1	22983.5	24555.5	23769.5	14447	11183.2	12815.1
Id3	8.44273	-0.885037	0.412699	7.09712e-06	0.00067715	158	1	463.243	482.465	472.854	259.847	252.229	256.038
Mrpl53	8.88838	-0.880744	0.414475	4.70224e-07	6.98836e-05	102	1	652.951	633.117	643.034	359.609	338.838	349.224
Elob	10.5292	-0.880322	0.414649	6.06793e-12	4.38018e-09	21	1	2052.61	1957.2	2004.9	1173.95	1004.36	1089.15
Ndufb7	10.7103	-0.873167	0.417627	1.07628e-12	9.59725e-10	17	1	2393.42	2141.54	2267.48	1287.63	1188.21	1237.92
Lrfn4	8.8182	-0.861275	0.422623	2.91715e-05	0.0020664	214	1	561.406	655.365	608.385	393.25	276.541	334.895
Naa38	9.93104	-0.860528	0.422939	6.21939e-09	2.04956e-06	46	1	1429.43	1201.4	1315.42	762.14	686.793	724.466
Prr7	7.76863	-0.860136	0.423104	0.000481933	0.0184486	396	1	285.666	301.938	293.802	176.325	147.387	161.856
Ppdpf	7.5414	-0.855319	0.425148	0.0016894	0.045407	564	1	269.122	232.016	250.569	155.444	121.556	138.5
Mpc1	8.14211	-0.849271	0.427727	0.000213792	0.00982036	328	1	387.138	371.225	379.182	240.126	180.815	210.471
Pcsk1n	10.7424	-0.848534	0.428042	5.724e-10	2.6294e-07	33	1	2044.89	2552.81	2298.85	1351.44	1201.89	1276.66
Ndufa2	10.8504	-0.848516	0.42805	2.33109e-13	2.52407e-10	14	1	2503.72	2451.1	2477.41	1441.92	1309.77	1375.84
Rplp0	11.3727	-0.848177	0.428195	5.2221e-11	2.72972e-08	29	1	3926.53	3189.1	3557.82	2121.7	1830.94	1976.32
Selenoh	7.32263	-0.841595	0.431022	0.0025371	0.0605107	635	1	223.901	204.682	214.291	120.643	118.517	119.58
Chpf	9.58611	-0.830115	0.435999	4.36853e-08	1.05115e-05	63	1	968.398	1081.26	1024.83	604.376	548.523	576.449
Avpi1	8.35572	-0.824894	0.438281	0.000666145	0.0234839	430	1	479.787	392.202	435.994	299.288	192.971	246.129
Hddc3	8.87236	-0.824573	0.438422	2.42179e-05	0.00177352	207	1	702.585	544.76	623.672	325.968	378.344	352.156
Rprml	9.28546	-0.818765	0.440976	1.47121e-05	0.00118001	189	1	788.615	868.946	828.781	556.814	382.902	469.858
Fbll1	8.66515	-0.817524	0.441524	1.94203e-05	0.00148683	198	1	493.022	584.807	538.915	301.608	309.969	305.788
Znrd2	8.32775	-0.817052	0.441732	7.24212e-05	0.00427172	257	1	404.786	448.14	426.463	247.086	237.035	242.061
Rpl13a	12.4435	-0.815431	0.442449	3.43862e-12	2.6063e-09	20	1	8196.09	6582.89	7389.49	4374.47	4023.51	4198.99
Egr2	9.33261	-0.811567	0.444162	3.37945e-05	0.00229727	223	1	813.983	894.373	854.178	590.455	382.902	486.679
Cox4i1	13.877	-0.806318	0.446499	2.91657e-12	2.32696e-09	19	1	21390.8	18399.8	19895.3	12568.9	10184.9	11376.9
Nme3	8.51166	-0.803596	0.447716	4.18178e-05	0.00274423	231	1	490.817	473.566	482.191	291.168	261.346	276.257
Bckdha	9.7456	-0.802334	0.448281	8.619e-08	1.74207e-05	75	1	1179.06	1088.25	1133.66	702.978	597.145	650.062
Abhd8	10.9879	-0.801434	0.448685	7.60161e-10	3.38342e-07	34	1	2470.63	2891.61	2681.12	1672.76	1403.98	1538.37
Rpl8	12.2268	-0.795326	0.451434	1.78029e-14	2.69874e-11	10	1	6743.49	5885.57	6314.53	3642.49	3634.53	3638.51
Kcna5	9.24838	-0.791343	0.453236	9.57013e-06	0.000853374	170	1	785.307	814.915	800.111	389.77	534.848	462.309
Timm13	10.2815	-0.79054	0.4536	4.96571e-09	1.75058e-06	43	1	1680.91	1592.96	1636.94	1026.63	866.089	946.358
LOC114841036	8.68196	-0.784615	0.456295	0.000684175	0.0239525	433	1	462.14	615.954	539.047	378.17	247.671	312.92
Pkig	10.289	-0.782397	0.457308	3.24223e-10	1.5359e-07	32	1	1633.48	1648.26	1640.87	967.465	940.542	954.003
Ntrk1	7.5394	-0.778553	0.45907	0.00286546	0.0650493	667	1	251.475	235.83	243.652	147.324	136.751	142.037
Efnb1	8.12477	-0.778418	0.459132	0.000332842	0.0138234	365	1	357.359	373.768	365.563	218.086	208.165	213.125
Hdhd3	7.80236	-0.772788	0.461724	0.00251289	0.0602204	632	1	274.637	308.93	291.784	197.205	144.348	170.777
Lmf1	9.19708	-0.772579	0.46182	1.54701e-06	0.000187609	125	1	763.247	771.055	767.151	460.532	437.603	449.067
Map1s	9.03433	-0.771045	0.462529	5.35018e-06	0.000541856	149	1	661.775	708.125	684.95	415.291	387.461	401.376
Rps5	12.3345	-0.766281	0.464738	2.83964e-12	2.32696e-09	18	1	7306	6165.26	6735.63	4097.23	3822.95	3960.09
Egr4	8.02965	-0.758212	0.468503	0.00147209	0.0412312	540	1	294.49	385.21	339.85	213.446	188.412	200.929
Uqcc2	10.6653	-0.757679	0.468753	5.33011e-09	1.79554e-06	45	1	2115.47	2107.85	2111.66	1373.48	1124.4	1248.94
Ccdc85b	9.85177	-0.757348	0.468908	6.00634e-08	1.33897e-05	68	1	1141.56	1261.15	1201.36	708.778	712.624	710.701
Pold2	7.77404	-0.756033	0.469525	0.00166137	0.0448069	562	1	279.049	289.861	284.455	168.204	168.659	168.432
Atp5e	12.0169	-0.750417	0.47217	3.81336e-13	3.85378e-10	15	1	5376.92	5373.86	5375.39	3394.25	2996.36	3195.31
Dohh	9.56996	-0.748194	0.473221	5.69975e-07	8.075e-05	107	1	998.178	971.923	985.05	618.296	554.601	586.448
Krtcap2	9.32602	-0.745743	0.474382	1.68185e-06	0.000199181	128	1	820.601	841.613	831.107	508.093	483.186	495.64
Snhg8	9.62081	-0.745308	0.474588	1.61989e-06	0.000194888	126	1	1110.68	928.063	1019.37	596.255	619.937	608.096
Alas2	7.67764	-0.743841	0.475285	0.00285698	0.0650493	663	1	251.475	278.419	264.947	150.804	165.62	158.212
Fkbp8	12.4612	-0.741289	0.4765	1.01462e-11	6.99121e-09	22	1	7193.5	7387.63	7290.56	4768.88	3953.62	4361.25
Tpgs1	7.87824	-0.740356	0.476944	0.00231774	0.0568522	618	1	292.284	315.923	304.103	203.005	161.062	182.034
Btbd17	8.96537	-0.737581	0.478269	0.000158712	0.00799308	301	1	571.333	719.566	645.449	433.851	340.358	387.104
Selenom	10.0143	-0.728806	0.482485	1.26657e-07	2.31324e-05	83	1	1357.74	1305.01	1331.38	856.102	750.61	803.356
Rgs14	10.5664	-0.727754	0.482993	8.13874e-10	3.42709e-07	36	1	1930.18	1972.45	1951.31	1201.79	1154.78	1178.29
Rnasek	11.3732	-0.723582	0.485012	8.81595e-10	3.61192e-07	37	1	3319.91	3497.4	3408.65	2250.46	1878.04	2064.25
Sipa1l3	10.151	-0.72137	0.486086	3.14366e-07	5.23678e-05	91	1	1367.67	1552.28	1459.97	953.545	817.466	885.505
Stub1	8.37758	-0.716874	0.488276	0.000468161	0.0180581	393	1	422.433	430.341	426.387	277.247	241.593	259.42
Yif1b	8.85812	-0.716289	0.488562	0.000629514	0.0224177	424	1	560.303	629.303	594.803	433.851	290.216	362.033
Thap3	8.02987	-0.712794	0.490272	0.00251176	0.0602204	631	1	371.697	297.489	334.593	212.286	196.01	204.148
Dynll1	11.5412	-0.707223	0.493011	1.45044e-06	0.000177316	124	1	3167.7	4448.34	3808.02	2505.66	2159.14	2332.4
B9d2	9.06315	-0.705209	0.494005	0.000213825	0.00982036	329	1	670.599	695.411	683.005	488.373	349.474	418.923
Mrpl54	8.10206	-0.704379	0.494416	0.00253874	0.0605107	636	1	368.388	333.085	350.737	243.606	186.893	215.25
Ndufc1	10.333	-0.702592	0.4953	4.57659e-08	1.08401e-05	64	1	1551.86	1739.16	1645.51	1025.47	996.762	1011.11
Ndufs7	10.0854	-0.70139	0.495896	6.25269e-08	1.37093e-05	69	1	1383.11	1387.64	1385.38	856.102	847.855	851.979
Rpl14	9.46884	-0.700856	0.496161	0.000142186	0.0073815	292	1	1038.99	767.876	903.432	610.176	501.42	555.798
Nr4a3	10.0764	-0.695178	0.498985	4.97793e-07	7.32626e-05	103	1	1268.4	1479.18	1373.79	849.142	847.855	848.499
Edf1	9.92434	-0.691252	0.500948	1.06926e-06	0.000139732	116	1	1254.06	1215.38	1234.72	821.301	708.065	764.683
Plk5	7.99408	-0.687079	0.503043	0.00274888	0.0636188	655	1	308.828	338.171	323.5	213.446	188.412	200.929
Sema3f	8.54071	-0.679589	0.506825	0.000529712	0.019633	409	1	491.92	450.682	471.301	307.408	281.099	294.253
Dctpp1	8.6697	-0.678704	0.507274	0.00111813	0.0341728	496	1	570.23	460.217	515.223	359.609	284.138	321.874
Csnk1g2	11.3538	-0.676747	0.508268	8.26102e-08	1.69228e-05	74	1	3179.83	3438.28	3309.06	2306.14	1833.98	2070.06
Fahd2a	8.42054	-0.675775	0.508762	0.000865988	0.0284762	461	1	459.934	406.186	433.06	265.647	276.541	271.094
Wdr54	9.20302	-0.674111	0.509609	0.000204647	0.00957482	324	1	789.718	699.225	744.472	528.974	404.175	466.574
Bmyc	8.06505	-0.673626	0.509857	0.00279748	0.0643351	658	1	319.858	356.605	338.231	225.046	199.048	212.047
Ndufa7	10.7039	-0.669448	0.511991	1.09409e-07	2.07243e-05	80	1	2195.99	2011.23	2103.61	1417.56	1227.72	1322.64
Dok4	9.94926	-0.668339	0.512559	1.10591e-05	0.000945796	176	1	1223.18	1269.41	1246.3	881.623	686.793	784.208
Anapc11	9.61738	-0.667839	0.512815	3.28375e-05	0.00225242	221	1	879.058	1100.96	990.01	646.137	600.184	623.16
Snhg6	8.08249	-0.666672	0.513414	0.00313689	0.0688164	691	1	368.388	314.651	341.52	209.965	220.321	215.143
1700003E16Rik	8.27987	-0.666497	0.513504	0.00154616	0.0426927	549	1	408.095	375.039	391.567	256.367	237.035	246.701
Ndufb11	10.6477	-0.665534	0.513999	1.20713e-08	3.58802e-06	51	1	2043.78	1997.24	2020.51	1247.03	1300.65	1273.84
Grm4	10.5073	-0.664816	0.514368	3.33323e-08	8.86463e-06	57	1	1836.43	1828.79	1832.61	1189.03	1122.88	1155.95
Notch1	8.47868	-0.663424	0.515085	0.0010956	0.0335518	495	1	405.889	492	448.945	288.847	278.06	283.454
Kctd10	9.57779	-0.657758	0.518012	0.000186172	0.00898729	312	1	870.234	1049.47	959.854	697.178	519.653	608.416
Islr2	10.4235	-0.656329	0.518752	1.13674e-05	0.000962671	179	1	1474.66	1973.72	1724.19	1118.27	1069.7	1093.98
Adora2a	13.1922	-0.651719	0.521149	1.61101e-11	1.0618e-08	23	1	11510.5	11952.3	11731.4	7925.33	7009.24	7467.28
Abhd17a	10.7591	-0.646654	0.523795	1.08767e-06	0.000140923	117	1	2146.36	2190.48	2168.42	1544	1226.2	1385.1
Nop53	9.46074	-0.646235	0.524015	1.69115e-05	0.00134221	191	1	884.573	878.481	881.527	571.895	554.601	563.248
Snrpb	9.91665	-0.641029	0.52675	2.40107e-06	0.000267486	136	1	1168.03	1245.89	1206.96	776.06	771.882	773.971
Smdt1	10.7188	-0.640422	0.52707	4.49042e-07	6.80703e-05	100	1	2031.65	2176.5	2104.07	1462.8	1236.84	1349.82
Polr2e	9.96695	-0.640164	0.527206	1.05406e-05	0.000918302	174	1	1348.92	1149.91	1249.41	837.542	765.805	801.673
Cystm1	10.6377	-0.635256	0.5298	7.61215e-08	1.60267e-05	72	1	1927.97	2043.01	1985.49	1301.55	1255.07	1278.31
Tomm6	10.3602	-0.630324	0.532419	1.0634e-06	0.000139732	115	1	1661.06	1609.49	1635.27	1125.23	987.645	1056.44
Dcakd	9.13245	-0.626785	0.534307	0.000155584	0.00786168	300	1	686.04	708.76	697.4	473.292	430.005	451.649
Gpx1	10.7981	-0.626489	0.534465	6.55325e-08	1.39917e-05	71	1	2241.21	2183.49	2212.35	1489.48	1376.62	1433.05
Dnpep	9.99544	-0.624496	0.535531	7.86918e-06	0.000722963	165	1	1316.93	1217.92	1267.43	872.343	771.882	822.113
Use1	10.4787	-0.623928	0.535836	7.06981e-06	0.00067715	157	1	1952.24	1590.42	1771.33	1201.79	1097.05	1149.42
Map3k11	8.81693	-0.623321	0.536161	0.00217452	0.0543952	606	1	474.272	645.194	559.733	390.93	335.799	363.365
Mrpl20	10.6939	-0.6208	0.537514	4.3928e-07	6.72631e-05	99	1	2007.38	2100.85	2054.12	1425.68	1245.95	1335.81
Lsm4	9.2042	-0.620498	0.537676	0.000201334	0.00944896	323	1	769.865	692.869	731.367	445.452	505.978	475.715
Ndufb8	11.6646	-0.616965	0.539579	3.49605e-08	8.98248e-06	59	1	4310.36	3730.05	4020.21	2705.19	2537.49	2621.34
Dlgap3	12.9622	-0.616108	0.540042	3.60058e-08	9.09687e-06	60	1	9201.98	10557	9879.51	7001.94	5889.4	6445.67
Crym	11.722	-0.614043	0.541158	2.61937e-08	7.45045e-06	52	1	4473.6	3885.15	4179.37	2651.83	2809.47	2730.65
Arpc1b	9.47052	-0.613499	0.541453	9.0415e-05	0.00509657	268	1	820.601	934.419	877.51	598.576	548.523	573.549
C1qc	9.64567	-0.613404	0.541504	4.06456e-05	0.00268888	229	1	986.045	995.443	990.744	596.255	698.949	647.602
P4htm	10.2465	-0.613134	0.541651	1.33039e-06	0.000166672	121	1	1465.83	1538.93	1502.38	1001.11	963.334	982.22
Lamb2	9.19469	-0.612591	0.541945	0.000187067	0.00898729	315	1	742.291	706.853	724.572	496.493	451.278	473.885
Tmem198	9.58972	-0.61096	0.542829	0.000431788	0.0169134	387	1	957.368	947.132	952.25	727.339	519.653	623.496
Tubb2b	12.1532	-0.609774	0.543474	2.64635e-08	7.45045e-06	53	1	6075.1	5178.72	5626.91	3813.02	3561.6	3687.31
Slc35c2	10.4585	-0.607426	0.544751	1.19596e-05	0.000996131	182	1	1759.22	1714.37	1736.8	1272.55	1007.4	1139.98
Vps72	9.07557	-0.605446	0.545831	0.00028583	0.0124152	349	1	658.466	672.528	665.497	452.412	422.408	437.41
Ndufb10	11.5486	-0.604368	0.54642	1.20669e-08	3.58802e-06	50	1	3873.59	3513.29	3693.44	2433.74	2425.05	2429.4
H2aw	8.65354	-0.601628	0.547919	0.00148698	0.0413909	544	1	463.243	528.869	496.056	327.128	326.683	326.905
Cad	8.40261	-0.600978	0.548275	0.00342989	0.0723139	719	1	423.536	410	416.768	295.808	253.749	274.778
Rpl18a	10.2295	-0.599883	0.548876	0.000138789	0.00725485	290	1	1701.87	1254.16	1478.01	1002.27	948.139	975.203
Sod1	11.6745	-0.598945	0.549391	4.18586e-09	1.54764e-06	41	1	4118.45	3927.1	4022.78	2584.55	2727.42	2655.98
Rack1	12.3973	-0.598509	0.549631	6.33056e-08	1.37093e-05	70	1	7260.78	6015.24	6638.01	4460.32	4307.65	4383.98
1700037H04Rik	10.6833	-0.597727	0.550061	1.81502e-05	0.00141096	195	1	2239.01	1806.54	2022.77	1238.91	1434.36	1336.64
Eef2	14.7103	-0.5974	0.55024	2.26063e-11	1.37076e-08	25	1	33834.4	32111	32972.7	22737.7	20848.4	21793.1
Syt5	11.3924	-0.595749	0.55115	2.67961e-08	7.45045e-06	54	1	3186.45	3423.03	3304.74	2249.3	2124.2	2186.75
Galnt18	9.82089	-0.595009	0.551558	9.0776e-05	0.00509657	270	1	1064.36	1158.81	1111.58	810.861	660.962	735.912
Pin1	10.2447	-0.594787	0.55168	7.24314e-06	0.00068198	161	1	1502.23	1479.81	1491.02	1056.79	917.75	987.269
Fuom	9.37798	-0.594588	0.55179	0.000207736	0.00965974	326	1	872.44	762.791	817.616	555.654	527.25	541.452
Cnpy2	9.7454	-0.59454	0.551816	2.35108e-05	0.0017301	206	1	1072.08	1037.4	1054.74	704.138	692.871	698.505
Insyn1	11.8101	-0.592118	0.553155	5.30483e-08	1.21842e-05	66	1	4447.13	4370.16	4408.64	3146	2703.11	2924.55
Uqcr10	11.6311	-0.590688	0.553946	3.12896e-07	5.23678e-05	90	1	4023.59	3761.2	3892.39	2809.59	2359.71	2584.65
Kcnj4	12.168	-0.587082	0.555947	4.59033e-07	6.88959e-05	101	1	5957.08	5323.65	5640.36	4113.47	3395.98	3754.72
Alad	9.59208	-0.58246	0.558523	0.00123496	0.036141	517	1	926.485	962.388	944.437	749.379	512.056	630.718
Rnd2	12.432	-0.580726	0.559492	3.45502e-08	8.98248e-06	58	1	7261.88	6254.25	6758.07	4630.84	4406.42	4518.63
Tmem119	9.79445	-0.580685	0.559515	2.96566e-05	0.00207173	217	1	1066.56	1105.41	1085.99	736.619	715.663	726.141
Lrrc4b	10.8028	-0.58065	0.559534	2.17143e-05	0.00162151	203	1	1980.91	2388.17	2184.54	1590.4	1331.04	1460.72
Gnb2	12.68	-0.580106	0.559839	4.35246e-07	6.72631e-05	98	1	8453.07	7594.86	8023.97	5914.99	4819.71	5367.35
D8Ertd738e	9.88335	-0.579919	0.559944	4.26398e-05	0.0027532	234	1	1161.42	1148	1154.71	824.781	720.221	772.501
Abhd11os	9.14772	-0.578514	0.560731	0.00184375	0.0486548	573	1	662.878	723.38	693.129	534.774	393.538	464.156
Enho	9.47752	-0.57787	0.561092	0.000127014	0.00670874	287	1	848.175	893.737	870.956	563.775	603.223	583.499
Ndufb6	10.5337	-0.577079	0.561536	1.16046e-05	0.0009773	180	1	1721.72	1899.35	1810.53	1311.99	1115.28	1213.64
Fos	8.62805	-0.575405	0.562477	0.00344793	0.0724927	721	1	497.434	468.481	482.958	354.969	293.255	324.112
Rps15	13.2043	-0.574702	0.562873	4.35215e-07	6.72631e-05	97	1	12834	10203	11518.5	7931.13	7536.49	7733.81
Mfge8	11.867	-0.571782	0.564519	5.32399e-09	1.79554e-06	44	1	4618.09	4489.66	4553.87	3017.24	3110.32	3063.78
Baiap2	13.6996	-0.570145	0.565443	1.87206e-09	7.27654e-07	39	1	16180.4	16241.1	16210.7	11613.1	10224.4	10918.7
Sfrp1	9.77241	-0.568858	0.566171	0.000102425	0.00560527	277	1	1089.72	1040.57	1065.15	769.1	667.04	718.07
Slc12a9	9.79909	-0.567534	0.566922	0.000165391	0.00827449	303	1	1127.22	1041.85	1084.53	798.101	665.521	731.811
Clpp	9.40574	-0.566893	0.567285	0.000329519	0.0137878	362	1	860.308	790.76	825.534	585.815	528.77	557.293
Zbtb17	9.6037	-0.565699	0.567963	0.00050967	0.0190767	405	1	856.999	1036.12	946.562	692.538	586.509	639.524
Zfp428	9.21739	-0.565193	0.56825	0.000672283	0.0235906	432	1	673.908	774.233	724.07	465.172	513.575	489.374
Srebf1	9.62085	-0.564216	0.568806	0.00024702	0.0111115	337	1	1019.13	895.644	957.389	606.696	688.312	647.504
Aldh1l1	11.0575	-0.562151	0.569982	1.92155e-05	0.00148616	196	1	2351.51	2828.05	2589.78	1898.97	1609.1	1754.04
Mbd3	10.9785	-0.561804	0.57018	1.05906e-06	0.000139732	114	1	2553.35	2349.4	2451.37	1716.84	1604.54	1660.69
Pltp	10.7217	-0.561753	0.570209	1.43361e-05	0.00115596	188	1	2222.46	1880.92	2051.69	1321.27	1458.68	1389.97
Pdlim2	9.68137	-0.561191	0.570529	0.00012058	0.0064589	283	1	945.236	1049.47	997.355	687.898	664.001	675.95
Mtln	8.89961	-0.560702	0.570808	0.00162886	0.0441715	559	1	579.053	580.993	580.023	418.771	367.708	393.239
Sphk2	8.82747	-0.560397	0.570982	0.002484	0.0600245	627	1	500.743	602.605	551.674	380.49	367.708	374.099
Aarsd1	10.566	-0.558189	0.572244	8.17663e-06	0.000742212	167	1	1930.18	1748.7	1839.44	1302.71	1195.81	1249.26
Fndc9	9.16071	-0.555693	0.573675	0.00122488	0.0361244	514	1	690.452	697.318	693.885	419.931	524.211	472.071
Crip2	11.6578	-0.555009	0.574067	3.43819e-07	5.60426e-05	93	1	4068.81	3763.74	3916.28	2816.55	2514.7	2665.62
Cst3	14.1213	-0.554141	0.574566	3.10788e-08	8.41293e-06	56	1	21816.5	21372.1	21594.3	13464.5	15949.7	14707.1
Rps2	8.79157	-0.553528	0.574918	0.00300046	0.0670878	677	1	570.23	503.442	536.836	341.049	390.5	365.774
Snrpa	9.04509	-0.5527	0.575394	0.00128745	0.0373164	523	1	595.598	683.969	639.784	440.811	431.525	436.168
Gpr6	10.974	-0.551774	0.575927	6.15657e-07	8.64142e-05	108	1	2418.79	2451.74	2435.26	1698.28	1624.3	1661.29
Ints1	9.85555	-0.551687	0.575977	0.000200283	0.00942886	322	1	1090.83	1152.45	1121.64	837.542	692.871	765.206
Tppp3	9.63362	-0.551634	0.576008	0.00116266	0.035109	502	1	866.925	1056.47	961.696	570.735	741.493	656.114
Ddt	9.78727	-0.551245	0.576232	0.000171118	0.00844942	307	1	1026.85	1112.4	1069.63	780.7	679.196	729.948
Grhpr	9.03003	-0.551196	0.57626	0.00120657	0.0357235	512	1	628.686	636.931	632.809	404.85	458.875	431.863
Tmcc2	12.2048	-0.551119	0.576304	1.22746e-07	2.26916e-05	82	1	5331.7	6097.24	5714.47	3817.66	3982.49	3900.07
Eef1b2	12.3867	-0.550896	0.576433	2.70318e-08	7.45045e-06	55	1	6830.62	6132.84	6481.73	4434.79	4414.01	4424.4
Phf2	9.98656	-0.549921	0.576995	3.77871e-05	0.00254818	224	1	1194.5	1260.51	1227.51	830.582	846.336	838.459
Pdyn	11.881	-0.5472	0.578567	2.52634e-05	0.00183238	209	1	4909.27	4209.34	4559.3	2731.87	3508.42	3120.14
Ccdc124	9.7863	-0.545429	0.579593	0.000187394	0.00898729	316	1	1085.31	1048.2	1066.76	784.18	677.676	730.928
Vgf	12.1508	-0.545038	0.57982	2.4529e-06	0.000269446	138	1	4915.89	6069.91	5492.9	3843.18	3686.19	3764.69
Psmd9	8.67012	-0.543239	0.580864	0.00354765	0.0742801	724	1	469.86	513.613	491.737	337.569	337.319	337.444
C1qa	10.3768	-0.541958	0.581608	3.15252e-05	0.00218215	219	1	1695.25	1513.5	1604.38	1052.15	1151.75	1101.95
Egln2	10.6457	-0.540978	0.582178	0.000143638	0.00743142	293	1	1727.23	2137.72	1932.48	1445.4	1211	1328.2
Lrrc24	8.81652	-0.537553	0.584176	0.0032526	0.0707406	697	1	516.185	570.186	543.186	394.41	354.033	374.221
Rbm15b	9.23829	-0.536866	0.584578	0.000715163	0.0246101	440	1	716.923	738	727.462	495.333	507.497	501.415
Rpl14-ps1	9.04228	-0.53639	0.584856	0.00231563	0.0568522	617	1	688.246	581.628	634.937	430.371	445.2	437.786
Ndufa8	11.3046	-0.53576	0.585224	1.11057e-05	0.000945796	178	1	3133.51	2957.72	3045.61	2308.46	1893.24	2100.85
Ost4	9.16255	-0.534378	0.586034	0.000974003	0.0311496	474	1	675.011	704.311	689.661	476.772	475.589	476.181
Asic4	11.8016	-0.532631	0.587059	5.63265e-05	0.0034569	247	1	4321.39	4265.27	4293.33	3415.13	2520.77	2967.95
Nme2	9.91341	-0.532305	0.58725	0.000581709	0.021096	418	1	1179.06	1140.37	1159.72	904.823	698.949	801.886
Wrap73	8.99501	-0.531093	0.587962	0.00261762	0.0616158	644	1	646.334	580.357	613.345	447.772	401.136	424.454
Ncor2	10.2832	-0.530237	0.588465	0.000153629	0.00780567	298	1	1355.54	1639.37	1497.45	1084.63	989.164	1036.9
Crocc	9.77482	-0.528373	0.589563	0.00260121	0.0614202	642	1	861.411	1242.71	1052.06	700.658	758.207	729.433
Slc25a19	9.87782	-0.527404	0.590135	0.000303862	0.0129389	356	1	1045.6	1213.47	1129.54	821.301	746.052	783.676
Ppp1ca	13.513	-0.524374	0.591926	5.24976e-07	7.50765e-05	106	1	14775.2	13264.9	14020.1	10492.5	9002.76	9747.62
Ahdc1	9.99408	-0.524328	0.591953	0.000100545	0.00554239	275	1	1182.37	1263.69	1223.03	822.461	878.244	850.353
Vwa1	9.43507	-0.522123	0.593259	0.00226104	0.0559137	613	1	745.6	913.442	829.521	631.056	524.211	577.634
Zfp523	10.9999	-0.521443	0.593663	3.94513e-05	0.00263454	227	1	2496	2411.06	2453.53	1888.53	1530.09	1709.31
Tesc	10.785	-0.520993	0.593931	2.11269e-05	0.00159335	201	1	2205.92	2021.4	2113.66	1560.24	1385.74	1472.99
Aip	11.0369	-0.519587	0.594766	1.00494e-05	0.000880571	173	1	2449.67	2581.41	2515.54	1874.61	1634.93	1754.77
Adgrb2	12.4964	-0.51947	0.594836	1.99938e-06	0.000226756	133	1	6536.13	7299.91	6918.02	5200.41	4452	4826.21
Prdx5	11.5069	-0.518827	0.595218	1.88937e-06	0.000216977	132	1	3611.09	3355.65	3483.37	2549.75	2312.61	2431.18
Eif4h	13.0814	-0.518582	0.595364	3.98845e-08	9.91163e-06	61	1	10233.2	10514.4	10373.8	7612.12	6870.97	7241.54
Nhp2	9.84735	-0.517871	0.595788	0.000302084	0.0128994	355	1	1157	1047.57	1102.29	802.741	736.935	769.838
Fasn	12.2893	-0.517626	0.595933	5.055e-07	7.36815e-05	104	1	6099.36	5878.58	5988.97	4460.32	3906.52	4183.42
Car11	12.7358	-0.517504	0.596006	4.22771e-07	6.67581e-05	96	1	8070.35	8252.13	8161.24	6133.08	5269.46	5701.27
Ssna1	9.52245	-0.51595	0.596933	0.000495595	0.0188762	398	1	891.191	867.675	879.433	605.536	624.495	615.016
Rabac1	10.4812	-0.515801	0.597022	2.00563e-05	0.00152124	199	1	1684.22	1734.08	1709.15	1223.83	1166.94	1195.39
Pex6	10.0603	-0.51569	0.597089	8.83583e-05	0.00505443	265	1	1262.89	1290.39	1276.64	915.264	870.647	892.955
Vim	9.81699	-0.514871	0.597577	0.000410288	0.0163243	381	1	1155.9	1000.53	1078.21	754.02	755.168	754.594
Caly	12.1662	-0.514154	0.598006	1.78881e-07	3.19018e-05	85	1	5531.34	5453.96	5492.65	4014.86	3677.08	3845.97
Ssbp4	9.78134	-0.51327	0.598535	0.000330164	0.0137878	363	1	1000.38	1102.23	1051.31	757.5	715.663	736.581
Bex1	9.77824	-0.51272	0.598864	0.000293805	0.0126889	351	1	1053.33	1044.39	1048.86	766.78	703.507	735.143
Selplg	9.50667	-0.512412	0.599049	0.0010501	0.0328217	485	1	888.985	848.605	868.795	555.654	662.482	609.068
Atp5d	11.4415	-0.512213	0.599168	4.97573e-05	0.00312975	241	1	3605.57	3037.18	3321.38	2524.23	2133.31	2328.77
Ddx54	9.83884	-0.511959	0.59932	0.000629985	0.0224177	426	1	1004.8	1182.33	1093.56	812.021	721.74	766.881
Laptm5	10.4629	-0.510153	0.600404	0.000166976	0.00832628	304	1	1838.63	1530.03	1684.33	1222.67	1142.63	1182.65
Atpif1	11.6361	-0.509613	0.600728	3.7917e-06	0.000399156	144	1	3955.21	3640.42	3797.82	2828.15	2507.1	2667.63
Rpl41	11.1304	-0.508607	0.601333	3.97591e-06	0.000415661	145	1	2778.35	2569.34	2673.84	1883.89	1875.01	1879.45
Vps51	9.71046	-0.508348	0.601488	0.000356503	0.014606	370	1	995.972	1002.43	999.203	722.699	682.235	702.467
Prxl2b	10.5277	-0.506964	0.602322	2.23996e-05	0.00166448	204	1	1782.38	1737.26	1759.82	1211.07	1265.7	1238.39
Pou3f1	10.4091	-0.506783	0.60243	8.88504e-05	0.00506347	266	1	1613.63	1627.92	1620.78	1223.83	1057.54	1140.69
Tsc22d4	10.6527	-0.506161	0.602805	0.000124195	0.00660587	285	1	1722.82	2114.2	1918.51	1338.67	1362.95	1350.81
Bad	9.46016	-0.506133	0.602822	0.00193166	0.0501404	584	1	886.779	792.032	839.405	642.657	539.406	591.031
Igsf8	11.0813	-0.505841	0.602998	1.76174e-05	0.00138374	193	1	2426.51	2737.15	2581.83	1901.29	1735.22	1818.25
Por	10.8915	-0.505104	0.603443	4.5364e-05	0.00290157	237	1	2272.09	2254.05	2263.07	1736.57	1452.6	1594.58
Ppp1r16a	10.0353	-0.502362	0.6051	0.00147346	0.0412312	541	1	1209.95	1287.85	1248.9	1012.71	750.61	881.658
Dctn3	11.1148	-0.500534	0.606207	1.74854e-05	0.00138053	192	1	2580.92	2694.56	2637.74	1995.25	1733.7	1864.47
Psmb6	11.4978	-0.499767	0.606672	6.55885e-05	0.00394546	252	1	3687.19	3190.37	3438.78	2662.27	2201.69	2431.98
Taldo1	11.6032	-0.497881	0.607817	7.1025e-06	0.00067715	159	1	3885.72	3508.2	3696.96	2756.23	2479.75	2617.99
Rbm14	9.00886	-0.496712	0.608528	0.00332874	0.0716541	704	1	606.627	617.225	611.926	417.611	449.758	433.685
Atp9a	13.0684	-0.49606	0.608925	7.97396e-08	1.65585e-05	73	1	10226.6	10175	10200.8	7546	6919.59	7232.79
Ndufa11	11.1092	-0.495417	0.609317	4.43755e-05	0.00285038	236	1	2741.96	2503.86	2622.91	2005.69	1715.46	1860.58
Rpl37	11.1197	-0.494017	0.61017	0.000874387	0.0286901	462	1	3092.7	2188.58	2640.64	1893.17	1856.77	1874.97
Map3k10	11.4249	-0.493969	0.6102	3.32154e-05	0.00226807	222	1	3048.58	3477.06	3262.82	2483.62	2150.03	2316.83
Atp6v1g1	9.55176	-0.49174	0.611561	0.00126771	0.0368852	521	1	877.955	902.001	889.978	676.298	589.548	632.923
Nomo1	12.0173	-0.487518	0.614149	1.14636e-06	0.000147268	118	1	4727.28	5089.72	4908.5	3598.41	3403.58	3500.99
Tmem143	9.45553	-0.487512	0.614153	0.00230751	0.056785	616	1	805.16	857.504	831.332	644.977	540.925	592.951
Josd2	9.473	-0.486506	0.614771	0.00228315	0.0563121	614	1	772.071	910.264	841.168	626.416	574.353	600.385
Cdc37	11.2378	-0.485541	0.615364	8.77362e-06	0.000786978	169	1	2823.57	2891.61	2857.59	2130.98	1950.98	2040.98
Dipk1b	9.89523	-0.483627	0.616543	0.000755397	0.0254083	449	1	1158.11	1093.97	1126.04	863.062	747.571	805.317
Eno1	10.8136	-0.482272	0.617379	0.00161114	0.0437694	558	1	1791.2	2463.18	2127.19	1646.08	1399.42	1522.75
Asphd2	11.5206	-0.481527	0.617839	8.6388e-06	0.000779497	168	1	3498.58	3444.64	3471.61	2634.43	2338.44	2486.43
Rps3	14.0389	-0.479494	0.619097	1.39623e-05	0.00113184	187	1	22012.8	17737.4	19875.1	13700	14810.1	14255
Smim12	9.59428	-0.479464	0.619115	0.0011752	0.0352071	506	1	913.25	912.171	912.71	683.258	626.015	654.636
Ndufc2	10.7836	-0.479303	0.619215	3.252e-05	0.00224078	220	1	2075.77	2086.87	2081.32	1436.12	1549.84	1492.98
Pcdhgc3	10.6732	-0.478598	0.619652	0.000846141	0.0278997	459	1	1659.95	2194.93	1927.44	1423.36	1343.2	1383.28
Ubc	11.4853	-0.478098	0.619962	7.9421e-05	0.00464843	259	1	3356.3	3410.95	3383.63	2690.11	2168.26	2429.18
Metrn	10.1693	-0.477262	0.62048	0.000186535	0.00898729	314	1	1358.84	1358.4	1358.62	958.185	993.723	975.954
Tnk2	11.6104	-0.477144	0.620553	1.25221e-05	0.00103728	183	1	3437.92	3939.82	3688.87	2647.19	2652.97	2650.08
Psph	9.42488	-0.476424	0.621	0.0020222	0.0518689	591	1	845.969	775.504	810.737	583.495	581.951	582.723
Tmem205	9.65694	-0.476255	0.621105	0.00257141	0.0609062	640	1	1033.47	870.853	952.163	726.179	642.729	684.454
BC031181	10.7492	-0.475309	0.621693	4.0797e-05	0.00268888	230	1	2089	1969.91	2029.46	1444.24	1475.39	1459.81
Dnajc15	9.20595	-0.474801	0.622009	0.00306192	0.068158	681	1	689.349	703.039	696.194	508.093	493.822	500.958
Ndufb9	12.1199	-0.474314	0.622312	7.55118e-06	0.00070226	163	1	5595.31	4897.12	5246.21	3886.1	3666.44	3776.27
Palm	11.8802	-0.47395	0.622538	1.11019e-05	0.000945796	177	1	4347.86	4537.34	4442.6	3426.73	2970.53	3198.63
Gpx4	9.37161	-0.473495	0.622822	0.00222654	0.0552874	610	1	787.512	773.597	780.555	578.855	545.484	562.169
Rhog	9.6506	-0.473	0.62313	0.00113356	0.0344862	498	1	977.221	916.621	946.921	667.017	697.429	682.223
Mrpl11	10.1706	-0.472603	0.623377	0.00116832	0.0351401	504	1	1454.8	1260.51	1357.66	1064.91	891.919	978.413
Vps18	10.2165	-0.471184	0.624263	0.000706482	0.0244511	438	1	1292.67	1509.06	1400.86	1068.39	952.697	1010.54
Scaf1	10.9285	-0.470434	0.624731	0.000918347	0.0298099	467	1	1995.25	2592.85	2294.05	1778.33	1533.13	1655.73
Rps9	12.3487	-0.470003	0.625001	2.86084e-05	0.00203603	213	1	6705.99	5571.55	6138.77	4258.47	4605.46	4431.97
Cldn5	10.1118	-0.468493	0.625945	0.000508033	0.0190625	404	1	1218.77	1384.47	1301.62	945.425	935.983	940.704
Hdac5	12.2143	-0.466086	0.627453	1.34508e-06	0.000167132	122	1	5457.44	5712.67	5585.05	4149.43	3936.9	4043.17
Stard10	10.5685	-0.464719	0.628312	9.62241e-05	0.00532358	274	1	1761.42	1806.54	1783.98	1252.83	1332.56	1292.7
Lrrtm1	10.6014	-0.463763	0.628913	0.000282756	0.0123752	346	1	1943.41	1705.47	1824.44	1381.6	1264.19	1322.89
Ap2s1	11.1133	-0.462926	0.629439	2.12994e-05	0.00159841	202	1	2561.07	2640.53	2600.8	1933.77	1840.06	1886.91
Icam5	11.2912	-0.462508	0.629703	9.54008e-05	0.00531342	272	1	2802.62	3081.04	2941.83	2299.18	1970.73	2134.96
Ndufs6	10.6785	-0.461378	0.630415	6.69825e-05	0.00398191	255	1	1945.62	1900.62	1923.12	1400.16	1393.34	1396.75
Tmem126a	9.35464	-0.460761	0.630804	0.00349495	0.0733794	722	1	780.895	755.163	768.029	585.815	530.289	558.052
Bcl9l	10.0528	-0.460211	0.63115	0.000981141	0.0312461	476	1	1162.52	1329.16	1245.84	946.585	864.569	905.577
Mrpl28	9.49126	-0.457972	0.632565	0.00218229	0.0544997	607	1	858.102	828.9	843.501	606.696	621.457	614.076
Pitpnm1	10.9001	-0.456662	0.633395	0.000113006	0.00613997	279	1	2263.27	2214	2238.64	1735.4	1527.05	1631.23
Banf1	10.4344	-0.454399	0.634829	0.000348432	0.0143529	368	1	1592.67	1646.99	1619.83	1255.15	1109.2	1182.18
Uchl1	12.9506	-0.454245	0.634927	2.63569e-06	0.000287441	139	1	9358.6	9173.2	9265.9	7159.71	6366.51	6763.11
Etfb	10.1061	-0.453932	0.635126	0.000640188	0.0227274	427	1	1346.71	1233.18	1289.95	953.545	929.906	941.725
Apoe	14.9965	-0.452953	0.635748	1.89474e-07	3.33981e-05	86	1	39635.9	36854.3	38245.1	28530.9	27348.6	27939.8
Flywch1	11.1808	-0.451157	0.636891	0.000233608	0.0105395	336	1	2525.78	2903.06	2714.42	2126.34	1844.62	1985.48
Fam20c	10.0528	-0.450163	0.637524	0.00151826	0.0421078	546	1	1152.59	1330.43	1241.51	960.505	856.972	908.738
Mbp	17.1388	-0.449027	0.638249	3.01109e-06	0.000326036	140	1	155878	181336	168607	120101	126920	123511
Dmwd	11.116	-0.447279	0.639365	4.76026e-05	0.0030067	240	1	2577.61	2605.57	2591.59	1972.05	1829.42	1900.74
Atp5g3	12.5334	-0.446564	0.639823	1.16687e-06	0.000148644	119	1	6871.43	6969.37	6920.4	5163.29	4992.92	5078.11
Ndufv1	11.8394	-0.445148	0.64073	0.000167603	0.00833014	305	1	4474.7	4077.12	4275.91	3447.61	2833.78	3140.7
Hint1	10.8902	-0.444508	0.64114	0.000370058	0.0149592	375	1	2259.96	2168.23	2214.1	1772.53	1481.47	1627
Abcb9	10.4447	-0.443755	0.641623	0.0014881	0.0413909	545	1	1590.47	1660.34	1625.4	1334.03	1056.02	1195.03
Map2k2	9.78546	-0.443547	0.641756	0.00244627	0.0592953	624	1	1090.83	967.474	1029.15	784.18	729.338	756.759
Actn4	11.4775	-0.440417	0.643768	0.000106213	0.00579165	278	1	3290.13	3353.1	3321.61	2643.71	2251.83	2447.77
Vtn	11.3047	-0.439308	0.644482	0.000148654	0.00762006	295	1	3165.49	2725.71	2945.6	2209.86	2134.83	2172.34
Scamp4	10.2217	-0.437249	0.645811	0.000987857	0.031394	477	1	1379.8	1399.09	1389.44	1095.07	957.256	1026.16
Ap1s1	13.6312	-0.434947	0.647299	7.23458e-06	0.00068198	160	1	15536.3	13968.6	14752.4	11401.9	10423.5	10912.7
Kcnh3	11.0656	-0.431998	0.649211	0.00166126	0.0448069	561	1	2275.4	2703.46	2489.43	2055.57	1634.93	1845.25
Plxnb2	10.2179	-0.431948	0.649243	0.000669156	0.0235353	431	1	1398.55	1367.94	1383.25	1002.27	1048.42	1025.34
Fam210b	10.5054	-0.431889	0.649282	0.00199601	0.051546	587	1	1878.34	1498.25	1688.29	1278.35	1224.68	1251.52
Rab1b	11.7035	-0.431832	0.649319	8.38941e-05	0.00481724	264	1	3958.52	3788.53	3873.52	3076.4	2666.64	2871.52
Itgb1bp1	10.9606	-0.431117	0.649783	0.000283276	0.0123752	347	1	2287.54	2340.5	2314.02	1838.65	1593.91	1716.28
Wwc1	11.3303	-0.430956	0.649888	5.18977e-05	0.00322425	244	1	2890.85	3088.67	2989.76	2250.46	2184.97	2217.72
Jpt1	10.678	-0.430493	0.650188	0.000366891	0.0148709	374	1	2002.97	1800.82	1901.9	1404.8	1417.65	1411.22
Smpd1	11.096	-0.429938	0.65055	9.5356e-05	0.00531342	271	1	2449.67	2631.63	2540.65	1905.93	1865.89	1885.91
Ramp1	10.713	-0.426257	0.652949	0.000579042	0.0210496	417	1	2073.56	1817.99	1945.77	1486	1410.05	1448.03
Adprh	10.6883	-0.42584	0.653221	0.000267961	0.0118082	344	1	1934.59	1890.45	1912.52	1461.64	1385.74	1423.69
Ndufs8	11.0963	-0.425121	0.653691	0.00026634	0.0118054	342	1	2676.88	2397.07	2536.98	1966.25	1812.71	1889.48
Camk2b	15.6268	-0.424964	0.653793	7.332e-06	0.000686085	162	1	60409	56845.7	58627.4	46603	40735	43669
Atp5c1	12.5151	-0.424724	0.653951	4.59998e-05	0.00292988	238	1	7138.35	6425.24	6781.8	5339.62	4765.01	5052.31
Ndufa6	9.91722	-0.424346	0.654198	0.00189872	0.049711	579	1	1157	1083.16	1120.08	830.582	838.738	834.66
C2cd2l	12.4696	-0.42289	0.655151	8.93943e-05	0.00507539	267	1	6539.44	6594.97	6567.2	5340.78	4456.56	4898.67
Tmbim6	13.3406	-0.422852	0.655176	1.37328e-06	0.000169248	123	1	12223	11799.1	12011	9051.71	8867.53	8959.62
Pgd	10.6114	-0.421024	0.656374	0.00061102	0.0220078	420	1	1817.68	1802.73	1810.2	1433.8	1270.26	1352.03
Snrk	9.99506	-0.418774	0.657853	0.00219164	0.0546433	608	1	1122.81	1236.99	1179.9	908.304	856.972	882.638
Arpc4	12.3782	-0.417945	0.658399	0.000102099	0.00560527	276	1	6464.44	5842.34	6153.39	4926.65	4284.86	4605.75
Git1	12.3913	-0.417475	0.658708	6.86898e-05	0.00406746	256	1	5768.47	6648.36	6208.42	4793.24	4503.66	4648.45
Mrps18a	9.99754	-0.417005	0.659018	0.00312885	0.0687394	690	1	1263.99	1098.42	1181.2	904.823	864.569	884.696
Cmtm5	10.8761	-0.416369	0.659437	0.000698531	0.0242868	436	1	2255.55	2086.87	2171.21	1503.4	1750.41	1626.9
Bloc1s1	10.0477	-0.416236	0.659525	0.00242654	0.0590431	623	1	1294.87	1150.54	1222.71	931.504	901.036	916.27
Ptpn5	13.9325	-0.416121	0.659601	2.9581e-05	0.00207173	216	1	18775.7	17345.9	18060.8	14500.4	12570.4	13535.4
Jph3	12.0079	-0.415773	0.65983	0.000189125	0.00898729	319	1	4404.11	5109.43	4756.77	3749.22	3382.3	3565.76
Tac1	12.7413	-0.415695	0.659882	7.06223e-06	0.00067715	156	1	7712.99	8103.39	7908.19	6069.28	5787.6	5928.44
Ecsit	10.2248	-0.415598	0.659946	0.00170909	0.0458552	565	1	1385.32	1378.75	1382.03	1104.35	967.892	1036.12
Mid1ip1	10.9984	-0.414029	0.660982	0.000229805	0.0103989	335	1	2404.45	2318.25	2361.35	1702.92	1841.58	1772.25
Rcc2	11.6083	-0.412402	0.662058	0.000521158	0.0193633	408	1	3634.25	3569.23	3601.74	2985.92	2426.57	2706.24
Tmem164	11.0269	-0.412323	0.662111	0.00048902	0.0186727	397	1	2555.56	2258.5	2407.03	1869.97	1747.37	1808.67
Srp14	11.3228	-0.411823	0.662442	0.0001501	0.00766115	297	1	2994.53	2914.5	2954.52	2323.54	2118.12	2220.83
1810037I17Rik	10.2153	-0.410513	0.66331	0.00160112	0.0435752	557	1	1364.36	1376.84	1370.6	1082.31	980.048	1031.18
Hras	12.0533	-0.41038	0.663398	0.000252738	0.0113016	339	1	5252.29	4546.87	4899.58	3901.18	3471.95	3686.57
Bsg	13.1962	-0.409467	0.664004	9.8761e-06	0.000870417	172	1	11228.1	10405.1	10816.6	8359.18	7928.51	8143.84
Sdhb	11.3894	-0.409415	0.664039	0.000208875	0.00968299	327	1	3068.43	3114.73	3091.58	2472.02	2183.45	2327.74
Sgta	11.1985	-0.409395	0.664052	0.000336347	0.0138929	367	1	2654.82	2761.94	2708.38	2171.58	1906.91	2039.25
Szrd1	10.8979	-0.408743	0.664485	0.000381291	0.0153723	376	1	2093.42	2303.63	2198.52	1648.4	1663.8	1656.1
Srebf2	11.8319	-0.407619	0.665232	0.000146169	0.00753666	294	1	3980.58	4416.56	4198.57	3314.21	3016.12	3165.16
Atox1	10.0713	-0.406892	0.665716	0.00242479	0.0590431	622	1	1183.47	1294.2	1238.84	961.665	907.114	934.389
Chmp1a	10.6901	-0.405069	0.666931	0.00082214	0.0272709	457	1	1946.72	1855.49	1901.11	1511.52	1359.91	1435.72
Spns1	10.3382	-0.405	0.666977	0.00216831	0.0543295	605	1	1479.07	1500.16	1489.61	1212.23	1037.79	1125.01
Tnrc18	10.286	-0.404866	0.667066	0.00237934	0.0581749	620	1	1353.33	1519.86	1436.6	1141.47	1028.67	1085.07
Penk	15.4206	-0.40438	0.66739	6.39938e-06	0.000625859	155	1	53167	47751.4	50459.2	38567.5	37682.4	38125
Gsn	11.8043	-0.404304	0.667441	0.000160651	0.00806394	302	1	4363.3	3865.44	4114.37	3020.72	3196.93	3108.82
Inf2	13.1539	-0.403229	0.668159	8.06391e-05	0.00470157	260	1	9901.26	11061.1	10481.2	8410.22	7440.76	7925.49
Psma7	10.888	-0.402768	0.668467	0.000755929	0.0254083	451	1	2308.49	2049.37	2178.93	1694.8	1601.5	1648.15
Sem1	10.9615	-0.402692	0.668518	0.000296117	0.0127163	353	1	2233.49	2351.94	2292.72	1751.65	1716.98	1734.31
Tubb4b	11.1624	-0.40254	0.668619	0.00101684	0.0321132	480	1	2398.93	2871.27	2635.1	2069.49	1917.55	1993.52
Erp29	10.9018	-0.40222	0.668833	0.000315249	0.0133488	358	1	2173.93	2224.81	2199.37	1689	1639.49	1664.25
Cox8a	10.9918	-0.4021	0.668914	0.00035893	0.0146658	371	1	2240.11	2441.57	2340.84	1762.09	1780.8	1771.44
Rtn2	10.5458	-0.402063	0.668938	0.0028963	0.0654323	671	1	1888.27	1548.47	1718.37	1266.75	1334.08	1300.42
Serpina9	11.2252	-0.400862	0.669742	0.000180109	0.00880734	310	1	2674.67	2826.78	2750.73	2097.33	2069.5	2083.42
Mgat1	10.6418	-0.39909	0.67093	0.00139919	0.0395774	535	1	1834.22	1835.15	1834.68	1494.12	1288.5	1391.31
Stmn3	12.5479	-0.397675	0.67188	0.000481866	0.0184486	395	1	6788.71	6957.29	6873	5790.87	4643.45	5217.16
Rasl10b	15.1669	-0.397417	0.672054	2.00444e-06	0.000226756	134	1	43221.6	41214.2	42217.9	32344	31761.1	32052.5
Txn2	11.5283	-0.396077	0.672955	0.000351861	0.0144549	369	1	3560.35	3216.44	3388.39	2695.91	2453.92	2574.91
Lrp1	12.7852	-0.394912	0.67374	0.000119367	0.00641661	282	1	8493.88	7694.66	8094.27	6522.85	5789.12	6155.98
Itm2c	14.7884	-0.394865	0.673771	1.26593e-05	0.00104295	184	1	34031.8	30862.5	32447.2	25310.7	24045.4	24678
Babam1	10.5321	-0.394808	0.673809	0.00244842	0.0592953	625	1	1669.88	1725.82	1697.85	1403.64	1179.1	1291.37
Prrc2a	12.642	-0.394418	0.674072	2.6816e-05	0.00193573	210	1	7260.78	7395.26	7328.02	5785.07	5365.19	5575.13
Ndn	12.2741	-0.393428	0.67474	0.000397713	0.0159496	378	1	5777.3	5576	5676.65	3905.82	4737.66	4321.74
Ubxn6	10.5474	-0.392662	0.675257	0.00196236	0.0508502	585	1	1731.64	1697.85	1714.75	1401.32	1211	1306.16
Neurl1a	12.7814	-0.39185	0.675805	9.07018e-05	0.00509657	269	1	8563.37	7565.62	8064.49	6315.2	5977.53	6146.37
Ncoa5	10.6245	-0.39068	0.676597	0.00157897	0.0432372	553	1	1702.97	1912.06	1807.52	1423.36	1334.08	1378.72
Tmem242	10.7757	-0.390265	0.676877	0.000738291	0.0250936	446	1	2053.71	1960.37	2007.04	1566.04	1496.66	1531.35
Gaa	12.7719	-0.389012	0.677726	6.00619e-05	0.00365522	249	1	7900.49	8106.56	8003.53	5767.67	6456.16	6111.91
Rundc3a	12.615	-0.388511	0.678066	0.000500286	0.0189123	401	1	6940.92	7413.69	7177.31	6027.52	4938.22	5482.87
Dctn1	12.2865	-0.38816	0.678304	0.000140196	0.00730318	291	1	5415.53	6014.61	5715.07	4526.44	4207.37	4366.9
Agap3	11.6038	-0.38816	0.678304	0.00133427	0.0383072	528	1	3354.1	3766.92	3560.51	2976.64	2464.55	2720.6
Ipo13	11.6375	-0.38744	0.678792	0.000257082	0.0114621	340	1	3616.6	3670.93	3643.77	2939.52	2631.69	2785.6
Aldoa	14.7124	-0.386502	0.679429	3.80592e-05	0.00255283	226	1	30938	30449.4	30693.7	25049.7	21910.5	23480.1
Zmiz2	12.162	-0.385717	0.679963	0.000284348	0.0123863	348	1	4919.2	5556.93	5238.06	4196.99	3821.43	4009.21
Aldh2	11.0425	-0.385479	0.680125	0.000426707	0.0168012	385	1	2358.13	2463.18	2410.65	1858.37	1832.46	1845.41
Arhgdia	13.1902	-0.382958	0.681842	5.29383e-05	0.00327547	245	1	10732.9	10613	10672.9	8639.9	7729.46	8184.68
Fscn1	12.0079	-0.382462	0.68218	0.000728611	0.0248762	444	1	4483.53	4920.64	4702.08	3913.94	3300.25	3607.1
Hcfc1r1	10.6978	-0.382102	0.682425	0.00158585	0.0432372	556	1	1915.84	1876.47	1896.15	1539.36	1370.55	1454.95
Ngef	14.1919	-0.381746	0.682668	0.000295247	0.0127149	352	1	20108	22616.1	21362.1	17753.1	15038	16395.6
Smarcd1	12.7712	-0.38137	0.682925	0.000550775	0.0202924	411	1	8243.51	7713.73	7978.62	6721.21	5529.29	6125.25
Tesk1	10.5901	-0.380052	0.683826	0.00137563	0.0393404	530	1	1804.44	1712.47	1758.45	1340.99	1361.43	1351.21
Bag6	12.1016	-0.379513	0.684194	0.00020568	0.00959355	325	1	4800.08	5225.12	5012.6	4012.54	3693.79	3853.17
Csf1r	11.9087	-0.378971	0.684566	0.000197708	0.00933662	321	1	4465.88	4302.78	4384.33	3213.28	3529.69	3371.49
Psd	13.0439	-0.378646	0.684788	2.81608e-05	0.00201363	212	1	9846.11	9412.21	9629.16	7563.4	7249.31	7406.35
Gtf3c1	11.5897	-0.378316	0.685014	0.000455405	0.0177012	390	1	3327.63	3700.17	3513.9	2788.71	2618.02	2703.37
Asphd1	10.4287	-0.377684	0.685447	0.00184554	0.0486548	575	1	1577.23	1564.99	1571.11	1222.67	1195.81	1209.24
Slc32a1	12.6189	-0.377116	0.685837	6.65549e-05	0.00397666	253	1	6916.65	7420.05	7168.35	5394.14	5644.77	5519.45
Scap	10.8287	-0.376432	0.686306	0.00108253	0.0332861	493	1	2032.75	2111.66	2072.21	1651.88	1540.73	1596.3
4933434E20Rik	10.5031	-0.375878	0.686686	0.00206088	0.0524177	596	1	1618.04	1688.31	1653.18	1221.51	1326.48	1274
Tubb5	13.6214	-0.375494	0.68695	0.00026392	0.0117324	341	1	15119.4	13589.1	14354.2	11856.7	10273	11064.8
Ttbk1	10.6485	-0.374598	0.687565	0.00312723	0.0687394	689	1	1712.89	1942.57	1827.73	1325.91	1493.62	1409.77
Fis1	12.16	-0.374405	0.687698	0.000518658	0.0193633	406	1	5532.44	4888.22	5210.33	4229.47	3809.27	4019.37
Chchd10	10.9055	-0.372738	0.688845	0.00132717	0.0381756	527	1	2264.37	2100.85	2182.61	1619.4	1751.93	1685.67
Cx3cl1	14.7059	-0.37123	0.689885	0.000189002	0.00898729	318	1	30035.8	30752.6	30394.2	25490.5	21506.3	23498.4
Kcnab2	13.072	-0.371126	0.689957	0.00322417	0.0702229	696	1	9492.06	10094.9	9793.48	8700.23	6444	7572.11
Tshz1	10.6693	-0.370523	0.690373	0.00249871	0.0601237	630	1	1828.71	1874.56	1851.63	1332.87	1531.61	1432.24
Zcchc14	11.4753	-0.36783	0.692235	0.000794098	0.0264566	455	1	3306.67	3161.77	3234.22	2652.99	2359.71	2506.35
Park7	11.5258	-0.367224	0.692654	0.00114803	0.0347364	501	1	3420.27	3277.46	3348.87	2793.35	2399.22	2596.28
Ppp1r37	10.8543	-0.367027	0.692791	0.00106983	0.0330296	491	1	2116.58	2088.14	2102.36	1610.12	1650.13	1630.12
Drd2	13.1466	-0.366398	0.693227	0.000172287	0.00847952	308	1	10833.3	9759.28	10296.3	8297.7	7676.28	7986.99
Npdc1	10.544	-0.365879	0.693587	0.00256239	0.0607877	639	1	1709.59	1680.05	1694.82	1367.68	1262.67	1315.17
Asna1	11.0923	-0.365359	0.693947	0.00204686	0.0522589	593	1	2578.72	2377.37	2478.04	2049.77	1797.51	1923.64
Slc39a7	11.7706	-0.363268	0.6954	0.00139178	0.0395774	533	1	3991.61	3933.46	3962.53	3360.61	2800.35	3080.48
H3f3b	11.4898	-0.362392	0.69601	0.000708585	0.024468	439	1	3308.88	3212.62	3260.75	2404.74	2668.16	2536.45
Plec	11.2978	-0.362193	0.696148	0.0019134	0.049923	581	1	3029.83	2678.67	2854.25	2335.14	2105.96	2220.55
Bcr	13.3461	-0.36113	0.696889	6.52846e-05	0.00394282	251	1	12175.6	11427.9	11801.7	9395.08	8981.49	9188.29
Ppp1r9b	14.6488	-0.361051	0.696944	0.000123403	0.00658687	284	1	27255.2	30968.1	29111.6	23172.8	22159.7	22666.2
Phyhip	14.1252	-0.3598	0.697816	0.00178886	0.047658	569	1	18721.6	21763.7	20242.7	17436.4	14112.7	15774.5
Pitpnb	12.029	-0.359205	0.698231	0.000214091	0.00982036	330	1	4685.37	4780.79	4733.08	3781.7	3598.07	3689.88
Tuba1a	13.3239	-0.359163	0.698261	0.000752667	0.0254083	448	1	12298	10928.3	11613.1	9758.17	8349.4	9053.79
Sbf1	11.4223	-0.359013	0.698366	0.00072178	0.0246986	443	1	3023.21	3192.92	3108.06	2502.18	2344.52	2423.35
Gng10	10.6893	-0.356094	0.700407	0.00251464	0.0602204	633	1	1897.09	1838.96	1868.03	1402.48	1516.41	1459.45
Lrrn2	10.9134	-0.35499	0.701181	0.00215639	0.0541203	604	1	2221.36	2140.9	2181.13	1786.45	1624.3	1705.37
Eif3h	10.985	-0.354474	0.701542	0.00185521	0.0487741	576	1	2375.77	2207.64	2291.71	1842.13	1742.81	1792.47
Camkv	14.5569	-0.353377	0.702312	0.00040107	0.0160417	379	1	26677.3	27807.6	27242.4	23107.8	19540.2	21324
Prdx2	12.4336	-0.353212	0.702428	0.000227123	0.0103082	334	1	6386.13	6118.86	6252.49	5062.37	4727.02	4894.7
Ptpa	12.5108	-0.352717	0.702776	0.000439801	0.0171387	389	1	6880.26	6309.55	6594.91	5399.94	4929.11	5164.52
Atp6v0b	12.3108	-0.351791	0.703427	0.00101924	0.0321218	481	1	5836.86	5642.11	5739.48	4865.17	4129.87	4497.52
Gng7	15.4009	-0.351442	0.703673	0.000191326	0.00906347	320	1	50894.9	46844.3	48869.6	40521	36087	38304
Slc2a1	11.5478	-0.351405	0.703699	0.0015716	0.0432162	551	1	3351.89	3411.58	3381.74	2844.39	2456.96	2650.68
Nol6	11.7525	-0.351247	0.70381	0.0014496	0.040769	539	1	3737.93	4056.14	3897.03	3260.84	2848.98	3054.91
Prkcz	12.7498	-0.350668	0.704218	0.000468157	0.0180581	392	1	7697.55	7858.02	7777.78	6514.73	5684.28	6099.5
Cox6a1	11.2418	-0.350369	0.704428	0.00100017	0.0317188	478	1	2783.87	2685.03	2734.45	2107.77	2181.94	2144.85
Ddr1	11.156	-0.350084	0.704629	0.00339698	0.0721216	714	1	2471.73	2680.58	2576.15	1857.21	2184.97	2021.09
Tubb4a	13.999	-0.349314	0.705171	0.000188088	0.00898729	317	1	18072	18887.3	18479.7	15337.9	13673.6	14505.7
Aamp	11.9295	-0.348809	0.705528	0.00119212	0.0355735	508	1	4433.89	4370.16	4402.03	3713.26	3199.97	3456.61
Fam110b	10.8981	-0.348553	0.705709	0.00340815	0.0721565	716	1	2280.92	2025.85	2153.38	1730.76	1651.65	1691.21
Sptbn2	13.9875	-0.348361	0.705844	0.00295735	0.0664156	675	1	19396.6	17256.2	18326.4	16131.4	12658.6	14395
Ncaph2	11.2437	-0.348039	0.706071	0.00228458	0.0563121	615	1	2775.04	2696.47	2735.76	2294.54	2004.16	2149.35
Rtl6	11.3615	-0.346637	0.707062	0.00331268	0.0715341	702	1	2858.87	3075.32	2967.09	2528.87	2137.87	2333.37
Pcx	10.9946	-0.346421	0.707215	0.00222842	0.0552874	611	1	2250.04	2351.3	2300.67	1883.89	1735.22	1809.55
Gnb5	13.1457	-0.346343	0.70727	0.00012596	0.00667633	286	1	10351.3	10084.7	10218	8287.25	7787.2	8037.23
Otub1	12.7305	-0.345993	0.707517	0.00119892	0.035636	510	1	8129.91	7193.76	7661.83	6426.57	5629.58	6028.07
Selenow	14.7573	-0.345179	0.708094	0.00300056	0.0670878	678	1	33965.6	28463.6	31214.6	27080.9	22064	24572.4
Akr1a1	12.6152	-0.344399	0.708646	0.000362125	0.014717	373	1	7223.28	6915.34	7069.31	5821.03	5315.05	5568.04
Tkt	11.8727	-0.343284	0.709437	0.00180653	0.0480441	570	1	4528.75	3918.84	4223.79	3436.01	3222.76	3329.39
Adcy5	15.2498	-0.341255	0.710878	0.000185283	0.00898729	311	1	44475.7	43235	43855.4	36659.3	32575.6	34617.4
Tubb3	12.8896	-0.340932	0.711108	0.00158539	0.0432372	555	1	9153.45	7927.31	8540.38	7172.47	6313.33	6742.9
Apbb1	12.8038	-0.340265	0.711581	0.00330191	0.0714031	701	1	7732.84	8358.28	8045.56	7076.18	5634.13	6355.16
Gabrd	11.7637	-0.339607	0.71205	0.00116514	0.035114	503	1	4104.11	3718.61	3911.36	3150.64	3031.31	3090.98
St3gal2	11.7419	-0.337317	0.713682	0.000882006	0.0288154	464	1	3836.09	3863.54	3849.81	3158.76	2935.58	3047.17
Ndufb5	11.3287	-0.336971	0.713929	0.00210825	0.0532651	600	1	2989.02	2792.45	2890.73	2190.14	2387.06	2288.6
Samm50	11.4399	-0.33657	0.714216	0.00104283	0.0327293	483	1	3103.73	3140.16	3121.94	2499.86	2444.8	2472.33
Rxrg	11.7598	-0.336373	0.714356	0.00166072	0.0448069	560	1	3981.68	3811.41	3896.55	3274.76	2897.6	3086.18
Ccdc85c	11.5056	-0.335925	0.714677	0.00204775	0.0522589	594	1	3091.59	3441.46	3266.53	2498.7	2677.28	2587.99
Gnl1	12.4494	-0.33578	0.71478	0.000877899	0.0287431	463	1	6285.76	6280.95	6283.36	5300.18	4657.13	4978.65
Aplp1	15.0334	-0.33537	0.715073	6.66318e-05	0.00397666	254	1	36869.7	38469.5	37669.6	30382.3	29330	29856.2
Slc4a3	11.6106	-0.333868	0.716148	0.00292187	0.0659116	672	1	3381.67	3639.79	3510.73	2984.76	2586.11	2785.43
Gap43	13.3045	-0.33352	0.716398	0.00211258	0.0532854	601	1	12453.5	10259.5	11356.5	8695.59	9329.44	9012.52
Calm3	15.171	-0.332479	0.717144	0.0010824	0.0332861	492	1	39460.5	43334.2	41397.4	35567.7	30185.5	32876.6
Necab2	11.7334	-0.332165	0.717369	0.00097336	0.0311496	472	1	3786.46	3854	3820.23	2936.04	3133.11	3034.57
Rab5c	11.8329	-0.331635	0.71775	0.00184552	0.0486548	574	1	4260.73	3923.93	4092.33	3416.29	3087.53	3251.91
Fbxl16	14.7011	-0.331224	0.718044	0.000659031	0.0232873	429	1	30867.4	28885.6	29876.5	25436	22059.4	23747.7
Gpr37l1	12.8025	-0.330737	0.718394	0.000275583	0.0121089	345	1	8114.47	7908.24	8011.35	6224.72	6515.42	6370.07
Ubb	12.1526	-0.329756	0.719099	0.000576836	0.0210199	416	1	5076.92	5131.68	5104.3	4164.51	3958.18	4061.34
Syndig1l	13.3527	-0.328486	0.720013	0.000980567	0.0312461	475	1	12073	11371.3	11722.1	9986.7	8683.68	9335.19
Aco2	13.6287	-0.327974	0.720382	0.000629964	0.0224177	425	1	14470.8	13911.4	14191.1	12020.2	10590.6	11305.4
Nsg2	15.5347	-0.327787	0.720516	9.569e-05	0.00531342	273	1	52196.4	54162.6	53179.5	43407.2	41335.2	42371.2
Ybx1	11.1997	-0.327529	0.720702	0.00214928	0.0540313	603	1	2622.84	2646.89	2634.86	2050.93	2148.51	2099.72
Got2	12.3639	-0.327135	0.720986	0.00335794	0.0717868	707	1	6358.56	5449.51	5904.03	4989.29	4423.13	4706.21
Pitpnm2	11.6486	-0.327059	0.721041	0.00334489	0.0717868	706	1	3335.35	3856.55	3595.95	2770.15	2962.93	2866.54
Psmb1	11.7102	-0.326911	0.721148	0.00219994	0.05476	609	1	3914.4	3590.84	3752.62	3119.32	2864.17	2991.75
Pde1b	15.3544	-0.326527	0.721425	0.00113521	0.0344862	499	1	48550	45270.4	46910.2	40528	34289.5	37408.7
Myo18a	12.119	-0.326172	0.721681	0.00123736	0.036141	519	1	4943.46	5017.89	4980.68	4186.55	3759.13	3972.84
Ppp1r1b	15.179	-0.32505	0.722492	0.000417297	0.0165597	382	1	41001.4	42038.1	41519.7	35200	31088	33144
Tafa5	11.1154	-0.324454	0.722922	0.00308645	0.0683029	685	1	2553.35	2411.69	2482.52	1944.21	2020.87	1982.54
Rap1gap	13.066	-0.322361	0.724437	0.00114174	0.0346153	500	1	9615.59	9562.22	9588.91	8208.37	7129.28	7668.82
Sptb	12.2814	-0.32153	0.725039	0.00102965	0.0323827	482	1	5606.34	5523.88	5565.11	4655.2	4251.43	4453.32
Timm8b	11.3734	-0.320554	0.725747	0.00296246	0.066432	676	1	3093.8	2835.68	2964.74	2403.58	2344.52	2374.05
Cbarp	11.4938	-0.320297	0.725933	0.00344409	0.0724927	720	1	3284.61	3160.5	3222.55	2735.35	2426.57	2580.96
Mt2	11.9085	-0.31842	0.727297	0.00282894	0.0647793	662	1	4016.98	4568.48	4292.73	3539.25	3345.84	3442.54
Nisch	12.9107	-0.317531	0.727944	0.00122796	0.036141	515	1	8070.35	9121.71	8596.03	7035.58	6760.05	6897.82
Tln2	12.181	-0.317506	0.727962	0.00269511	0.0629511	649	1	5481.7	4885.68	5183.69	4353.59	3965.77	4159.68
Ubqln4	12.2339	-0.316377	0.728785	0.00104888	0.0328217	484	1	5419.94	5330.64	5375.29	4467.28	4166.34	4316.81
Rtl8c	12.2057	-0.315758	0.729236	0.00210808	0.0532651	599	1	5521.41	5018.53	5269.97	4408.11	4059.98	4234.05
Pja1	12.3721	-0.31491	0.729854	0.000687816	0.0239692	435	1	5824.72	6000.62	5912.67	4739.88	4766.53	4753.2
Arhgap33	12.9284	-0.312875	0.731341	0.00310785	0.0684766	688	1	8168.51	9207.53	8688.02	7472.91	6515.42	6994.17
Abca2	12.4582	-0.312429	0.731667	0.000736605	0.0250926	445	1	6387.23	6153.82	6270.53	5048.45	5050.66	5049.56
Calr	14.3366	-0.310742	0.732903	0.00189186	0.0496172	578	1	21820.9	24263.1	23042	17319.2	19834.9	18577.1
Arpp21	16.1028	-0.310289	0.733235	0.000752504	0.0254083	447	1	82460.5	74268.5	78364.5	65713.4	60685.5	63199.4
Slc38a10	11.4072	-0.310262	0.733254	0.00341829	0.0722704	717	1	3131.3	2917.04	3024.17	2465.06	2412.89	2438.98
Vat1l	12.6504	-0.309296	0.733964	0.00327825	0.0709928	700	1	7744.98	6568.27	7156.62	5736.35	5814.95	5775.65
Celf4	13.3827	-0.309052	0.734142	0.000598202	0.0216424	419	1	11851.3	11924.3	11887.8	9223.4	9967.62	9595.51
Pfdn5	12.5176	-0.308964	0.734207	0.00310345	0.0684766	686	1	6956.36	6096.61	6526.48	5043.81	5492.82	5268.32
Mapk3	11.6974	-0.307663	0.735163	0.00210784	0.0532651	598	1	3640.87	3748.48	3694.67	2926.76	3043.47	2985.11
P4hb	11.9457	-0.306113	0.736304	0.00235368	0.0576405	619	1	4397.5	4374.61	4386.05	3705.14	3389.9	3547.52
Mag	13.4246	-0.304705	0.737341	0.000423739	0.0167278	384	1	12067.5	12372.5	12220	9855.62	9931.15	9893.38
Drap1	11.6382	-0.30268	0.738835	0.00254274	0.0605107	637	1	3526.16	3553.97	3540.06	2914	2826.18	2870.09
Zfp106	12.6144	-0.302411	0.739034	0.000888254	0.0289571	465	1	7050.11	6876.56	6963.34	5677.19	5615.9	5646.54
Cnp	14.4418	-0.301668	0.739584	0.00248667	0.0600245	628	1	23248.2	26165.6	24706.9	18804.1	21286	20045.1
Ppme1	12.2287	-0.300907	0.740147	0.00338752	0.0720302	712	1	5255.6	5398.65	5327.13	4600.68	4047.82	4324.25
Mtch1	13.6274	-0.300724	0.740282	0.00255436	0.060692	638	1	15111.6	12978.3	14044.9	11615.4	11189.3	11402.3
Fam102a	11.4987	-0.298931	0.74161	0.00338793	0.0720302	713	1	3222.84	3196.1	3209.47	2643.71	2573.95	2608.83
Crtc1	12.3776	-0.29851	0.741923	0.00288786	0.0653389	670	1	6000.09	5802.93	5901.51	5070.49	4526.45	4798.47
Pabpc1	11.6841	-0.298005	0.742298	0.00265344	0.0622656	646	1	3645.28	3651.86	3648.57	2951.12	2984.21	2967.66
Mlf2	12.8963	-0.292759	0.746202	0.00166411	0.0448069	563	1	8621.83	8254.04	8437.93	7131.86	6644.57	6888.22
Mapk8ip1	13.5705	-0.291435	0.74719	0.000701155	0.0243222	437	1	13475.9	13440.4	13458.2	11150.2	10842.8	10996.5
Clu	14.4459	-0.288875	0.749106	0.00050178	0.0189216	402	1	24819.9	24515.5	24667.7	20247.2	20135.8	20191.5
Gpr52	12.5865	-0.284208	0.75261	0.0027981	0.0643351	659	1	6503.04	7071.71	6787.38	5627.31	5520.17	5573.74
Atp1a3	15.8185	-0.270333	0.763125	0.00300778	0.06715	679	1	59886.2	67046.2	63466.2	53949.5	51293.7	52621.6
Pkm	14.26	-0.268215	0.764743	0.00326478	0.0709037	698	1	21656.6	21403.9	21530.3	18848.2	16907	17877.6
Ptms	14.0585	-0.259692	0.771289	0.00333242	0.0716541	705	1	18842.9	18495.1	18669	16216.1	14971.2	15593.6
Sf3b1	12.9602	0.259641	1.29647	0.00340257	0.0721392	715	1	7383.2	7182.95	7283.08	8706.03	8732.3	8719.16
Nmt2	11.673	0.289498	1.33576	0.0035747	0.0747433	725	1	2964.75	2942.47	2953.61	3655.25	3564.64	3609.95
Pik3r1	12.1548	0.28993	1.33633	0.00338604	0.0720302	711	1	4267.35	3980.5	4123.92	4882.57	5201.09	5041.83
Rbm25	12.3882	0.294403	1.34232	0.00181599	0.0482112	571	1	4696.4	4984.84	4840.62	5919.63	5953.22	5936.43
Ypel5	11.8548	0.298503	1.34784	0.00270288	0.0630353	650	1	3396.01	3283.82	3339.91	3988.18	4227.12	4107.65
9330159F19Rik	11.8263	0.301437	1.3518	0.00267097	0.0625799	647	1	3173.21	3368.99	3271.1	3956.86	4105.56	4031.21
Ank2	13.2302	0.301983	1.35254	0.000715949	0.0246101	441	1	8703.45	8604.92	8654.18	10992.4	10346	10669.2
Gabrb2	12.7917	0.302277	1.35294	0.00210374	0.0532651	597	1	6312.23	6458.93	6385.58	7394.03	8353.96	7873.99
Atp1b1	15.1546	0.308547	1.36145	0.000288337	0.0124883	350	1	31795	33758	32776.5	39922.4	41262.3	40592.4
Nrxn1	12.8383	0.308792	1.36178	0.0011212	0.0341976	497	1	6844.96	6315.28	6580.12	7918.37	8382.83	8150.6
Zfp445	12.3989	0.310002	1.36343	0.00106289	0.032985	488	1	4950.08	4750.92	4850.5	6184.12	5842.3	6013.21
Grin2a	12.2356	0.310328	1.36387	0.00285821	0.0650493	664	1	4173.6	4488.39	4330.99	5699.23	5041.55	5370.39
S100b	12.1565	0.310381	1.36394	0.00200348	0.051651	588	1	4300.44	3899.13	4099.78	5214.34	4953.42	5083.88
Fgf12	12.2655	0.310504	1.36411	0.00123307	0.036141	516	1	4361.1	4481.4	4421.25	5305.98	5659.96	5482.97
Eml5	11.332	0.312604	1.36698	0.00279505	0.0643351	657	1	2360.33	2266.13	2313.23	2910.52	2835.3	2872.91
Efcab14	11.2115	0.31518	1.37051	0.00342804	0.0723139	718	1	2161.8	2090.05	2125.92	2567.15	2722.86	2645
Gria3	12.4169	0.315223	1.37057	0.00137335	0.0393404	529	1	4841.99	4963.23	4902.61	6424.25	5775.44	6099.84
Rgs4	15.2062	0.315881	1.37147	0.00117104	0.0351522	505	1	32279.2	35486.3	33882.8	44934.9	39417.7	42176.3
Tceal5	11.5423	0.321827	1.37965	0.00280105	0.0643351	660	1	2533.5	2801.99	2667.74	3427.89	3240.99	3334.44
Dusp11	11.4229	0.331123	1.39253	0.0012351	0.036141	518	1	2439.74	2456.19	2447.97	3057.84	3101.2	3079.52
Neat1	12.1183	0.33141	1.39293	0.00139445	0.0395774	534	1	4222.13	3705.26	3963.69	5072.81	4901.76	4987.28
Nktr	11.0181	0.335282	1.39834	0.00272583	0.0633755	652	1	1843.04	1849.77	1846.41	2431.42	2227.52	2329.47
Tmem65	10.956	0.339508	1.40426	0.00201084	0.051665	590	1	1760.32	1771.58	1765.95	2215.66	2253.35	2234.5
Tial1	11.9213	0.3396	1.40439	0.000719498	0.0246762	442	1	3596.75	3299.07	3447.91	4321.11	4404.9	4363
Impact	13.0379	0.342058	1.40784	0.000804515	0.0267448	456	1	7307.1	7633	7470.05	8741.99	10195.5	9468.76
Stmn2	12.3702	0.342695	1.40874	0.0013994	0.0395774	536	1	4502.28	4900.3	4701.29	6408.01	5515.62	5961.81
Gls	12.8943	0.342963	1.40912	0.000497521	0.0189021	399	1	6525.1	6994.8	6759.95	9049.39	8098.69	8574.04
Dner	11.3675	0.345009	1.412	0.00307494	0.068235	682	1	2280.92	2407.88	2344.4	2738.83	3216.68	2977.76
Syn1	12.6739	0.346785	1.41451	0.000531494	0.019651	410	1	5426.56	6162.72	5794.64	7504.23	7234.12	7369.18
Slc25a46	11.4169	0.354227	1.42508	0.00240149	0.0586218	621	1	2233.49	2603.02	2418.26	2967.36	3215.16	3091.26
Clk4	10.9973	0.355565	1.42699	0.001211	0.0357848	513	1	1840.84	1773.49	1807.16	2351.38	2273.1	2312.24
Arglu1	12.1842	0.355895	1.42746	0.000386358	0.0155353	377	1	4340.14	3887.69	4113.92	5281.62	5248.19	5264.9
Gda	12.5962	0.35616	1.42784	0.000335758	0.0138929	366	1	5144.2	5801.66	5472.93	7091.26	6919.59	7005.43
Phf20l1	10.3975	0.360674	1.4343	0.00322406	0.0702229	695	1	1227.59	1153.09	1190.34	1535.88	1520.97	1528.43
Ogt	13.3004	0.361854	1.43599	3.98172e-05	0.00264732	228	1	8920.73	8877.62	8899.17	11161.8	11710.4	11436.1
Acsl3	12.4858	0.362129	1.43638	0.00124125	0.0361849	520	1	4793.46	5324.92	5059.19	5927.75	7077.61	6502.68
Gabra1	12.9491	0.36806	1.44493	0.00021443	0.00982036	331	1	6547.16	7374.28	6960.72	8671.22	9296.02	8983.62
Fmn2	10.5656	0.36814	1.44504	0.00263892	0.0620208	645	1	1273.92	1394	1333.96	1680.88	1762.57	1721.72
Disp2	11.6589	0.370084	1.44786	0.000498878	0.0189062	400	1	2826.88	2861.74	2844.31	3463.85	3888.28	3676.07
Clk1	12.0876	0.370827	1.44893	0.000965204	0.0311309	470	1	3901.16	3753.57	3827.37	5421.98	4476.31	4949.15
Sh3gl2	11.7337	0.371884	1.45047	0.00203247	0.0520442	592	1	2705.56	3281.91	2993.73	4093.75	3654.29	3874.02
Osbpl6	10.5283	0.373385	1.45264	0.00201057	0.051665	589	1	1250.76	1344.42	1297.59	1679.72	1682.04	1680.88
Slc25a27	10.2811	0.37428	1.45394	0.00260032	0.0614202	641	1	1096.34	1089.52	1092.93	1438.44	1394.86	1416.65
Usp54	10.7214	0.374576	1.45438	0.00172498	0.0460369	568	1	1430.54	1535.12	1482.83	1846.77	1998.08	1922.42
Firre	10.3908	0.3783	1.4598	0.0018565	0.0487741	577	1	1169.14	1186.14	1177.64	1535.88	1525.53	1530.71
Fstl1	10.3209	0.378929	1.46072	0.00286648	0.0650493	668	1	1165.83	1077.44	1121.63	1408.28	1508.82	1458.55
Slf2	10.953	0.379974	1.46225	0.000620214	0.0222722	422	1	1709.59	1765.86	1737.72	2307.3	2215.36	2261.33
Rbm39	12.4888	0.380127	1.46247	0.000115368	0.00622373	281	1	5068.09	5008.36	5038.23	6189.92	6924.15	6557.04
Appl2	10.3257	0.384556	1.46896	0.002872	0.0650772	669	1	1191.2	1055.19	1123.19	1510.36	1422.21	1466.28
Ccnl1	10.0259	0.385839	1.47085	0.00327815	0.0709928	699	1	922.073	902.001	912.037	1213.39	1169.98	1191.69
Cacng7	10.6171	0.386107	1.47124	0.0027202	0.0633417	651	1	1333.48	1414.34	1373.91	1950.01	1641.01	1795.51
Srek1	10.8328	0.38657	1.47192	0.000563866	0.0206465	414	1	1611.42	1578.98	1595.2	2104.29	2066.46	2085.38
Entr1	10.5985	0.388875	1.47532	0.00131795	0.0379825	526	1	1415.1	1294.84	1354.97	1832.85	1715.46	1774.16
Wsb1	10.9791	0.39341	1.48203	0.00120289	0.0356843	511	1	1900.4	1622.2	1761.3	2230.74	2396.18	2313.46
Pdcd4	10.704	0.39483	1.48413	0.000846616	0.0278997	460	1	1402.96	1506.51	1454.74	1968.57	1856.77	1912.67
Cx3cr1	11.2136	0.40173	1.49441	0.000331933	0.0138234	364	1	1954.44	2177.77	2066.11	2781.75	2677.28	2729.51
Crebzf	10.4917	0.402565	1.49566	0.00310611	0.0684766	687	1	1218.77	1285.94	1252.35	1486	1824.86	1655.43
Rian	13.2424	0.402576	1.49567	0.00105738	0.0329134	487	1	9209.7	7648.25	8428.98	12398.4	9885.56	11142
Psme4	10.491	0.403202	1.49661	0.0014369	0.0404868	538	1	1325.76	1177.24	1251.5	1591.56	1718.5	1655.03
Snap25	15.5752	0.405322	1.49979	0.000222972	0.0101808	332	1	38703.9	46142.5	42423.2	60688.1	51681.2	56184.7
Atp11b	10.5482	0.406317	1.50128	0.00131699	0.0379825	525	1	1272.81	1328.53	1300.67	1849.09	1598.47	1723.78
Dpysl2	13.8814	0.408218	1.50414	4.25508e-05	0.0027532	233	1	13458.3	12741.2	13099.7	16046.7	18721.2	17383.9
Ppfia2	10.5979	0.409098	1.50546	0.000686676	0.0239692	434	1	1291.56	1398.45	1345.01	1751.65	1820.31	1785.98
Ackr1	10.0135	0.411324	1.50881	0.00192964	0.0501404	583	1	928.691	863.861	896.276	1201.79	1182.13	1191.96
Dpp10	10.9493	0.411605	1.50924	0.000419868	0.0166182	383	1	1711.79	1716.92	1714.35	2140.26	2420.49	2280.37
Thoc1	9.88538	0.413039	1.5114	0.00303934	0.0677548	680	1	787.512	851.784	819.648	1056.79	1125.92	1091.35
Micu3	11.5853	0.413112	1.51151	4.26811e-05	0.0027532	235	1	2709.97	2615.74	2662.85	3589.13	3502.34	3545.74
Rsrp1	11.939	0.415415	1.515	5.11936e-05	0.0031936	243	1	3586.82	3213.26	3400.04	4586.76	4482.39	4534.57
Prkab2	10.2076	0.416091	1.51602	0.00128437	0.0372984	522	1	1016.93	1030.4	1023.67	1432.64	1299.13	1365.88
Hsf2	9.818	0.420743	1.52309	0.00274062	0.0635246	654	1	805.16	755.163	780.162	1002.27	1086.41	1044.34
Lrrfip1	9.96785	0.424578	1.52894	0.00158374	0.0432372	554	1	838.249	890.559	864.404	1151.91	1168.46	1160.18
Tet2	10.3693	0.425074	1.5297	0.00056797	0.0207466	415	1	1171.34	1111.77	1141.56	1503.4	1562	1532.7
Nemf	10.4304	0.428319	1.53468	0.000833263	0.0275796	458	1	1112.89	1266.23	1189.56	1574.16	1627.33	1600.75
Srsf6	11.7803	0.428883	1.53554	1.1836e-05	0.00099128	181	1	3045.27	3018.11	3031.69	4050.83	4111.64	4081.23
Per3	9.85944	0.429156	1.53596	0.00294568	0.0663277	673	1	866.925	734.187	800.556	1104.35	1051.46	1077.91
Camk2g	11.0141	0.429533	1.53654	0.000959919	0.0310265	469	1	1798.93	1765.23	1782.08	2686.63	2113.56	2400.09
Cdk14	10.9337	0.431332	1.53931	0.00106492	0.032985	489	1	1491.2	1877.74	1684.47	2315.42	2227.52	2271.47
Kcnc3	10.454	0.432264	1.54074	0.000520605	0.0193633	407	1	1148.18	1266.87	1207.52	1654.2	1604.54	1629.37
Zmym1	9.75558	0.432853	1.54165	0.0033616	0.0717868	709	1	695.967	792.032	743.999	966.305	1042.35	1004.33
Slc25a37	10.2716	0.434122	1.54361	0.000504156	0.018964	403	1	1057.74	1069.18	1063.46	1465.12	1408.53	1436.83
Khdc4	11.032	0.434181	1.5437	8.19973e-05	0.00474427	262	1	1774.66	1828.16	1801.41	2369.94	2497.98	2433.96
Sgpp2	10.249	0.435455	1.54567	0.00171543	0.0459439	566	1	1122.81	970.016	1046.41	1521.96	1308.25	1415.1
Hars2	9.57974	0.435836	1.54626	0.00317446	0.0693969	692	1	640.819	675.07	657.945	924.544	855.452	889.998
Zmym6	9.79341	0.437402	1.54868	0.00157368	0.0432162	552	1	777.586	747.535	762.561	1053.31	1011.96	1032.63
Efr3a	10.2158	0.443736	1.55852	0.00148062	0.0413346	543	1	923.176	1116.22	1019.7	1404.8	1369.03	1386.91
Ppip5k2	9.7372	0.44391	1.55879	0.00335913	0.0717868	708	1	806.263	657.272	731.767	989.506	1001.32	995.413
Srsf11	11.9127	0.444378	1.55952	5.43752e-06	0.000545876	151	1	3260.35	3349.92	3305.14	4591.4	4403.38	4497.39
Cadps	11.7836	0.445317	1.56099	6.02814e-05	0.00365522	250	1	2786.07	3256.48	3021.28	4213.23	4014.4	4113.81
Nek1	10.2487	0.445554	1.56135	0.000958646	0.0310265	468	1	981.633	1103.5	1042.57	1344.47	1495.14	1419.81
Meg3	16.039	0.445731	1.56163	3.29082e-07	5.42234e-05	92	1	59627	55764.5	57695.8	75872.9	81290.8	78581.8
Pnisr	12.6323	0.446992	1.5636	9.04515e-07	0.000121341	113	1	5539.06	5336.36	5437.71	7395.19	7430.13	7412.66
Slc30a10	9.76437	0.450635	1.56931	0.00192703	0.0501404	582	1	800.748	687.148	743.948	1013.87	1019.55	1016.71
Traip	10.1479	0.450934	1.56978	0.00131118	0.0379318	524	1	1040.09	900.729	970.41	1422.2	1230.76	1326.48
Lgals8	9.40306	0.452527	1.57228	0.00294906	0.0663277	674	1	579.053	578.45	578.752	772.58	811.388	791.984
Luc7l3	12.507	0.452785	1.57269	6.65749e-07	9.17462e-05	110	1	4964.42	4986.75	4975.58	6788.5	6831.46	6809.98
Sucla2	11.6203	0.455282	1.57662	2.70543e-05	0.00194368	211	1	2589.75	2787.37	2688.56	3487.05	3885.24	3686.15
Pan3	10.1746	0.464648	1.59145	0.000267274	0.0118082	343	1	1010.31	957.303	983.807	1358.4	1356.87	1357.63
Epha5	9.83526	0.47338	1.60541	0.0018392	0.0486548	572	1	740.085	810.466	775.275	972.105	1180.62	1076.36
Chuk	10.0835	0.474837	1.60775	0.000250647	0.0112413	338	1	929.794	910.9	920.347	1257.47	1300.65	1279.06
Scn1a	11.415	0.475503	1.60882	7.85053e-06	0.000722963	164	1	2364.74	2266.76	2315.75	3353.65	3086.01	3219.83
Mir100hg	10.8275	0.476977	1.6112	0.000431785	0.0169134	386	1	1673.19	1407.35	1540.27	1943.05	2344.52	2143.78
Stx3	9.76773	0.477742	1.61243	0.000611206	0.0220078	421	1	744.497	732.915	738.706	1059.11	998.281	1028.69
Elavl4	10.1313	0.478303	1.61333	0.00118213	0.0353449	507	1	854.793	1045.66	950.226	1243.55	1403.98	1323.76
Paxbp1	10.4716	0.481225	1.61806	8.3674e-05	0.00481724	263	1	1223.18	1180.42	1201.8	1612.44	1742.81	1677.63
Glt8d1	9.5727	0.481268	1.61812	0.001403	0.0396053	537	1	641.922	647.101	644.512	842.182	957.256	899.719
Lpl	12.1097	0.483126	1.62113	2.45899e-05	0.00179211	208	1	3371.74	4104.45	3738.1	5387.18	5062.82	5225
C030023E24Rik	10.903	0.488828	1.6304	1.53945e-05	0.00122824	190	1	1561.79	1671.15	1616.47	2246.98	2289.82	2268.4
Ttc14	11.6778	0.494067	1.63897	4.33186e-06	0.000443694	148	1	2923.94	2597.3	2760.62	3772.42	4003.76	3888.09
Nrbp2	11.1344	0.494658	1.63994	2.99487e-05	0.00208253	218	1	1745.98	2041.74	1893.86	2617.03	2719.82	2668.42
Eif2s3y	10.3248	0.499043	1.64714	0.000436871	0.0170684	388	1	956.265	1201.4	1078.83	1520.8	1528.57	1524.68
Guf1	9.71349	0.499829	1.64844	0.000409083	0.0163192	380	1	731.262	680.791	706.026	999.946	996.762	998.354
Sez6l	10.7213	0.505511	1.65783	0.000319025	0.0134356	359	1	1227.59	1606.31	1416.95	2002.21	2020.87	2011.54
Gng2	11.6577	0.507974	1.66192	1.30044e-05	0.00106559	185	1	2467.32	2951.37	2709.34	3995.14	3710.51	3852.82
Prpf39	10.5668	0.514304	1.67247	1.80168e-05	0.00140782	194	1	1290.46	1247.8	1269.13	1745.85	1879.56	1812.7
Tmc7	8.93745	0.52297	1.68703	0.00252768	0.0604371	634	1	400.374	417.628	409.001	566.095	609.301	587.698
9430015G10Rik	8.85424	0.524865	1.69023	0.00317708	0.0693969	694	1	412.507	359.148	385.827	555.654	554.601	555.127
Zscan26	10.9494	0.528225	1.69592	1.72361e-06	0.000202544	129	1	1636.79	1656.53	1646.66	2330.5	2418.97	2374.74
Stk38	9.9123	0.530661	1.70006	0.000309464	0.0131405	357	1	834.94	768.512	801.726	1052.15	1264.19	1158.17
Ftx	10.2783	0.531483	1.70145	0.000137925	0.00723461	289	1	1144.87	921.07	1032.97	1489.48	1496.66	1493.07
Snhg11	14.7369	0.533658	1.70516	3.00676e-10	1.47031e-07	31	1	23045.2	22345.3	22695.3	33666.4	32040.7	32853.6
Adamts4	10.9376	0.534613	1.70679	2.937e-05	0.00207079	215	1	1532.01	1727.09	1629.55	2157.66	2563.32	2360.49
Gabra3	10.7686	0.545654	1.72574	8.04027e-06	0.000734231	166	1	1340.09	1547.83	1443.96	2097.33	2118.12	2107.73
Clec2d	9.01841	0.548152	1.73005	0.00213951	0.0538752	602	1	477.581	380.124	428.853	615.976	638.17	627.073
A330023F24Rik	11.0625	0.551221	1.73537	4.05962e-06	0.000421505	146	1	1894.88	1638.73	1766.81	2477.82	2700.07	2588.95
Cpeb1	9.3183	0.554645	1.74132	0.000558579	0.0205024	413	1	569.127	484.372	526.75	787.66	759.727	773.694
Ints6l	10.4078	0.557525	1.74635	2.25755e-05	0.00166937	205	1	1214.36	1025.32	1119.84	1690.16	1606.06	1648.11
Iqsec3	10.9074	0.560979	1.75239	1.30045e-06	0.000164279	120	1	1522.08	1640.64	1581.36	2242.34	2423.53	2332.93
Ankrd29	8.80857	0.563931	1.75757	0.00223342	0.0553208	612	1	386.036	351.52	368.778	502.293	588.029	545.161
Cdh6	9.40255	0.568533	1.76568	0.000621489	0.0222722	423	1	588.98	522.512	555.746	912.944	735.416	824.18
Serpini1	11.4281	0.574356	1.77599	0.000114861	0.00621848	280	1	1924.66	2591.58	2258.12	3752.7	2972.05	3362.37
Dipk2a	9.5085	0.578716	1.78375	0.000153961	0.00780567	299	1	598.907	593.07	595.988	830.582	949.658	890.12
Zfp760	8.63184	0.582358	1.79025	0.00196689	0.0508806	586	1	316.549	331.814	324.182	466.332	504.459	485.395
Gjb6	10.157	0.583013	1.79143	0.000903091	0.0293776	466	1	828.322	1037.4	932.859	1150.75	1644.05	1397.4
Nos1ap	11.7532	0.583867	1.79296	5.95925e-06	0.000586599	154	1	2854.46	2784.82	2819.64	4816.44	3636.05	4226.25
Stxbp2	8.83317	0.584001	1.7932	0.00307888	0.068235	684	1	366.182	378.853	372.518	647.297	469.511	558.404
Dnajc21	8.50562	0.58842	1.80114	0.003319	0.0715685	703	1	272.431	320.372	296.402	462.852	428.486	445.669
Slc2a4rg-ps	8.43061	0.594531	1.81218	0.00249787	0.0601237	629	1	281.254	280.326	280.79	416.451	431.525	423.988
Lime1	9.85764	0.611849	1.84384	2.00704e-05	0.00152124	200	1	698.173	802.838	750.505	1178.59	1115.28	1146.93
Unc5d	8.911	0.617551	1.85438	0.000658225	0.0232873	428	1	409.198	368.047	388.622	545.214	647.287	596.251
Slc8a1	10.9271	0.622788	1.86412	2.30613e-07	4.01824e-05	87	1	1487.89	1650.17	1569.03	2279.46	2552.68	2416.07
Npy1r	8.67933	0.623525	1.86549	0.00205647	0.0523933	595	1	319.858	340.713	330.286	584.655	433.044	508.85
Rabl2	8.27668	0.623855	1.86611	0.00273713	0.0635246	653	1	258.092	241.551	249.821	364.249	405.694	384.972
Slit2	8.47211	0.6333	1.88382	0.00155334	0.042813	550	1	307.725	262.527	285.126	421.091	463.433	442.262
Ppp3cc	8.17996	0.640416	1.89727	0.00244863	0.0592953	626	1	233.827	230.744	232.286	374.69	349.474	362.082
Fgfr1op	8.66836	0.661641	1.93797	0.000471902	0.0181563	394	1	313.24	333.721	323.481	477.932	545.484	511.708
Zfp811	8.51751	0.662962	1.94053	0.000970495	0.0311496	471	1	273.534	308.93	291.232	426.891	495.342	461.116
1700047M11Rik	8.33728	0.667399	1.94916	0.00109144	0.0334922	494	1	243.754	269.52	256.637	409.491	405.694	407.592
Ap5s1	8.67862	0.668944	1.95217	0.000784408	0.0262491	453	1	318.755	331.179	324.967	588.135	445.2	516.668
Esrrg	9.31494	0.670574	1.95536	0.000169039	0.00837404	306	1	510.67	498.993	504.831	683.258	923.828	803.543
Tmem196	8.30319	0.670917	1.95603	0.00151943	0.0421078	547	1	230.518	270.155	250.337	418.771	378.344	398.557
Ppm1e	10.6321	0.690941	1.99559	5.36172e-06	0.000541856	150	1	1050.02	1448.03	1249.02	1922.17	2110.52	2016.35
Kcnj3	10.0005	0.704331	2.02249	8.14677e-05	0.00473168	261	1	691.555	913.442	802.499	1519.64	1095.53	1307.58
Zfp14	8.56904	0.716723	2.04771	0.000319072	0.0134356	360	1	270.225	322.279	296.252	461.692	512.056	486.874
Tmem181b-ps	11.2296	0.718363	2.05107	2.10508e-06	0.000236377	135	1	2006.28	1737.89	1872.09	3627.41	2532.93	3080.17
Trhde	8.2662	0.718748	2.05186	0.00137804	0.0393404	531	1	216.18	263.799	239.989	441.971	347.955	394.963
Nefh	9.45653	0.719857	2.05414	9.72706e-06	0.000862296	171	1	539.347	555.566	547.457	805.061	998.281	901.671
Nr2f1	8.56292	0.729172	2.07336	0.000186338	0.00898729	313	1	303.314	284.14	293.727	530.134	443.68	486.907
Vamp1	10.7552	0.729661	2.07438	2.96281e-10	1.47031e-07	30	1	1357.74	1326.62	1342.18	2140.26	2311.09	2225.67
Col11a1	7.74982	0.7388	2.09342	0.00307604	0.068235	683	1	148.899	184.341	166.62	279.567	276.541	278.054
Camk2d	10.2115	0.787384	2.19764	5.22877e-07	7.50765e-05	105	1	868.028	936.962	902.495	1317.79	1797.51	1557.65
Ypel4	8.03138	0.793157	2.21036	0.00139157	0.0395774	532	1	161.032	236.465	198.749	351.489	337.319	344.404
Vsnl1	11.8959	0.794092	2.21243	8.28423e-09	2.67193e-06	47	1	2437.54	3350.56	2894.05	5309.46	4727.02	5018.24
Miat	11.4801	0.796888	2.21863	9.02884e-08	1.77751e-05	77	1	2057.02	2277.57	2167.29	4456.84	3073.85	3765.35
Sphkap	10.0373	0.804003	2.23447	9.54909e-08	1.85583e-05	78	1	706.996	883.566	795.281	1306.19	1470.83	1388.51
Cd38	7.97391	0.827234	2.28698	0.00281433	0.0645423	661	1	196.327	181.163	188.745	241.286	428.486	334.886
Adra2a	7.31477	0.833934	2.30236	0.00278172	0.0642807	656	1	115.811	122.682	119.246	197.205	227.918	212.562
Clstn2	8.92522	0.877749	2.40548	0.000224434	0.0102168	333	1	306.622	410.636	358.629	831.742	486.225	658.983
Kcnj16	8.49504	0.879889	2.41063	0.000128424	0.00675967	288	1	254.783	277.147	265.965	386.29	592.587	489.438
Ptprk	9.06764	0.883245	2.41874	3.34653e-06	0.000354756	143	1	366.182	423.985	395.084	837.542	619.937	728.739
Cadps2	9.43241	0.890661	2.43674	1.09678e-05	0.000945796	175	1	422.433	592.435	507.434	1106.67	774.921	940.795
Fmn1	7.3479	0.898617	2.4562	0.00172183	0.046034	567	1	119.12	119.504	119.312	261.007	183.854	222.43
Mfsd4a	7.85128	0.909687	2.48355	0.000465755	0.0180573	391	1	141.179	195.783	168.481	354.969	278.06	316.515
Ldb3	7.86648	0.923201	2.51734	0.000361466	0.014717	372	1	207.356	131.581	169.469	323.648	319.085	321.367
Resp18	9.44588	0.924699	2.52111	1.9321e-05	0.00148674	197	1	509.567	502.807	506.187	692.538	1229.24	960.888
2810405F15Rik	7.34214	0.947206	2.5785	0.00350008	0.0733854	723	1	155.517	78.1861	116.852	242.446	208.165	225.306
Kcnip1	8.00023	0.953228	2.59407	4.75781e-05	0.0030067	239	1	170.959	197.054	184.006	319.008	393.538	356.273
Ndst3	7.56828	0.958939	2.60893	0.000148792	0.00762006	296	1	144.488	127.768	136.128	263.327	265.904	264.616
Kcnc2	9.53937	0.9609	2.61405	4.09799e-11	2.24277e-08	27	1	532.729	533.954	533.341	1012.71	1063.62	1038.16
Hapln4	8.83715	0.991153	2.69434	3.05023e-07	5.19533e-05	89	1	305.52	343.256	324.388	731.979	557.639	644.809
Ptpn3	8.48783	1.00657	2.7362	5.39788e-05	0.00332628	246	1	212.871	293.675	253.273	628.736	388.98	508.858
Tmem145	7.36786	1.01132	2.74924	0.00105503	0.0329078	486	1	108.09	124.589	116.34	295.808	173.218	234.513
Cdh19	8.24407	1.02274	2.78079	3.05863e-06	0.000328835	141	1	186.4	239.008	212.704	417.611	446.719	432.165
Plcxd2	9.7368	1.02807	2.79566	7.81184e-10	3.38342e-07	35	1	545.964	649.008	597.486	1383.92	1052.98	1218.45
A2ml1	6.57822	1.03663	2.8197	0.00286535	0.0650493	666	1	62.8686	70.5582	66.7134	141.524	132.192	136.858
Coro6	7.55077	1.03686	2.82034	0.000179266	0.00879448	309	1	158.826	102.977	130.901	281.887	255.268	268.578
Fam163a	7.8024	1.05413	2.86948	4.20157e-05	0.00274533	232	1	173.164	136.667	154.916	272.607	370.747	321.677
Kcnab3	8.31663	1.0551	2.87225	5.79948e-06	0.000574603	153	1	229.415	212.946	221.181	554.494	364.669	459.582
Rasgrf2	9.50059	1.08894	2.97111	9.00143e-14	1.13711e-10	12	1	488.611	504.714	496.662	1066.07	1046.9	1056.49
Pvalb	9.71354	1.10342	3.01447	9.20685e-10	3.67281e-07	38	1	619.863	525.69	572.776	1005.75	1455.64	1230.69
Nr2f2	8.69038	1.13236	3.10297	1.75515e-06	0.000204101	130	1	250.372	307.659	279.015	460.532	762.766	611.649
Ubap1l	6.1303	1.2656	3.54523	0.0026078	0.0614799	643	1	45.2213	45.1318	45.1766	83.5222	133.712	108.617
Tmem200a	6.32232	1.30452	3.68593	0.0014742	0.0412312	542	1	40.8095	61.0233	50.9164	154.284	97.245	125.765
Frzb	7.08557	1.32433	3.75965	3.78218e-05	0.00254818	225	1	70.5893	101.07	85.8296	250.566	179.296	214.931
Esr1	5.66308	1.37921	3.97178	0.00336227	0.0717868	710	1	29.7799	33.0543	31.4171	70.7618	92.6867	81.7243
Cwc22	9.49142	1.49125	4.44266	9.04165e-23	3.42656e-19	4	1	413.609	444.962	429.286	1125.23	1288.5	1206.86
Bhlhe22	7.45275	1.63077	5.10781	3.70307e-07	5.97179e-05	94	1	94.8544	104.248	99.5513	412.971	203.607	308.289
Kcng4	5.92722	1.67026	5.31355	7.59048e-05	0.00445985	258	1	31.9858	36.2326	34.1092	98.6026	118.517	108.56
Tafa1	7.37415	1.72327	5.60282	7.82971e-07	0.000106928	111	1	73.8982	108.698	91.298	412.971	189.932	301.451
Slc6a7	10.4902	1.72745	5.62627	1.29647e-29	9.82659e-26	2	1	783.101	797.752	790.427	3059	2175.86	2617.43
Gabrq	5.71856	1.75712	5.79572	0.00268491	0.0628095	648	1	28.6769	28.6047	28.6408	37.121	156.504	96.8123
Pnoc	5.78913	1.7974	6.03393	0.000329358	0.0137878	361	1	31.9858	27.3334	29.6596	60.3216	145.868	103.095
Prdm8	5.47315	1.91271	6.7714	0.000778901	0.0261225	452	1	16.5444	29.2403	22.8924	125.283	47.1031	86.1932
Qrfpr	4.12967	2.2087	9.10392	0.00317471	0.0693969	693	1	9.92663	6.35659	8.14161	46.4012	28.8696	37.6354
Slc17a6	7.21578	2.31904	10.1659	4.1426e-11	2.24277e-08	28	1	65.0746	68.0155	66.5451	200.685	463.433	332.059
Fam227b	4.6616	2.32163	10.1922	0.000300408	0.0128641	354	1	9.92663	12.7132	11.3199	41.7611	71.4143	56.5877
Clec18a	3.53903	2.78298	16.1672	0.00154356	0.0426927	548	1	4.41183	4.44962	4.43072	33.6409	27.3502	30.4955
Tmem215	5.00202	2.84482	17.1985	6.59951e-07	9.17462e-05	109	1	9.92663	13.9845	11.9556	112.523	59.2587	85.8908
Met	4.9464	2.90791	18.3185	8.36009e-07	0.000113152	112	1	6.61775	15.8915	11.2546	102.083	66.856	84.4693
Irs4	5.01273	2.92318	18.6004	5.02562e-05	0.00314807	242	1	8.82367	14.6202	11.7219	24.3606	153.465	88.9127
Pgr15l	1.8215	5.36025	212.778	0.000973668	0.0311496	473	1	1.10296	0	0.551479	5.80015	39.5058	22.653

## Sheet: C. Mouse Gene Atlas
EnrichR enrichment for Mouse Gene Atlas
red highlight: adj P-value < 0.05; blue highlight: P-value <0.05
Term	Overlap	P-value	Adjusted P-value	Old P-value	Old Adjusted P-value	Odds Ratio	Combined Score	Genes
nucleus accumbens	53/383	4.15331e-17	3.82105e-15	0	0	4.5278	170.789	CRTC1;CELF4;ICAM5;SERPINA9;SLC4A3;CX3CL1;C1QTNF4;JPH3;CAMKV;FAM110B;CAR11;DLGAP3;PSD;SLC32A1;APLP1;TRAIP;BCR;GAP43;INF2;PITPNM2;TLN2;NGEF;NECAB2;MEG3;CAMK2B;RGS14;PDE1B;NRXN1;PRKCZ;PHYHIP;RAP1GAP;ADCY5;GNG7;PENK;DRD2;TAC1;CRYM;SF3B1;P4HTM;SYT5;ARPP21;RASL10B;FBXL16;GPR6;BAIAP2;ARHGAP33;CALY;NSG2;CROCC;PPP1R1B;PTPN5;C2CD2L;SSBP4
olfactory bulb	42/414	1.97687e-09	9.09359e-08	0	0	3.12476	62.6256	IPO13;DPP10;CREBZF;ZFP523;HDAC5;SMARCD1;TSHZ1;ATP1A3;ICAM5;PPM1E;PLCXD2;CX3CL1;ZCCHC14;C1QTNF4;CACNG7;FRZB;PALM;RPRML;CKB;LRRC4B;KCNJ3;PPFIA2;KCNJ4;EPHA5;KCNH3;ANKRD29;ARPP21;KCNIP1;SLC32A1;RASL10B;IQSEC3;KCNAB3;ATP1B1;GNL1;SYN1;NCOR2;EML5;FAM163A;MAP3K10;SERPINI1;YPEL4;FGF12
spinal cord	37/353	7.65953e-09	2.34892e-07	0	0	3.22657	60.296	KCNG4;CNP;USP54;KCNC3;ATP1A3;RND2;HAPLN4;SLC8A1;ENHO;ADAMTS4;SLC25A27;NRBP2;ZFP14;SLC17A6;MBP;NEFH;CAMK2G;SCN1A;ABCA2;TSC22D4;TNK2;CMTM5;IQSEC3;APLP1;1700047M11RIK;ACSL3;GPR37L1;JOSD2;MIAT;KCNAB3;S100B;RUNDC3A;MAPK8IP1;DISP2;MAG;VAMP1;FLYWCH1
heart	43/568	4.68773e-06	0.000107818	0	0	2.25178	27.6306	ZFP106;NDUFB9;NDUFB8;NDUFA13;NDUFB7;NDUFB6;NDUFA11;NDUFB10;NDUFB5;NDUFB11;ATP5C1;UQCR11;CRIP2;LDB3;ATP5G3;SLC4A3;SLC8A1;TMEM143;TXN2;TMEM65;PPIP5K2;SMPD1;ATP5D;POLR2E;GABRD;NDUFV1;KCNJ3;NDUFA8;LAMB2;GOT2;MRPL28;CHCHD10;NDUFC1;SDHB;NDUFS8;NDUFS7;UQCRQ;NDUFS6;PSME4;TMEM126A;CORO6;ACO2;PKIG
dorsal striatum	36/477	2.96019e-05	0.000544675	0	0	2.23145	23.2688	PDE1B;NRXN1;SERPINA9;FBLL1;ADCY5;C1QTNF4;RGS4;JPH3;LRRTM1;GNG7;FAM110B;PENK;AP1S1;CAR11;DLGAP3;DRD2;TAC1;SF3B1;GABRD;RXRG;ARPP21;SLC32A1;RASL10B;FBXL16;GPR6;BAIAP2;POU3F1;BCR;INF2;NSG2;ADORA2A;PPP1R1B;ASPHD2;GNB5;PTPN5;NGEF
hypothalamus	25/296	8.36941e-05	0.00128331	0	0	2.50448	23.5129	MEG3;RASGRF2;IRS4;SLC8A1;NOL6;TIAL1;PCSK1N;RESP18;SLC17A6;NDN;VAT1L;GABRQ;9330159F19RIK;SPHKAP;GAA;UNC5D;PJA1;DISP2;IMPACT;GAP43;CALY;PITPNM1;SNHG11;GJB6;FLYWCH1
adipose brown	32/456	0.000303675	0.00399115	0	0	2.05298	16.6282	NDUFB9;NDUFB8;PCX;NDUFB6;NDUFB5;UQCR11;ETFB;UQCR10;ECSIT;TMEM143;SAMM50;NDUFV1;BCKDHA;SREBF1;NDUFA7;NDUFA6;GPX4;SGTA;TALDO1;NDUFC1;DNAJC15;SDHB;1700037H04RIK;SUCLA2;NDUFS8;UQCRQ;SLC25A19;CLPP;FASN;PEX6;ACO2;TKT
amygdala	24/308	0.000384345	0.00441996	0	0	2.28941	18.0038	EPHA5;DPP10;GABRB2;CAMK2D;NRXN1;GABRA3;UNC5D;NR2F2;PTPRK;MIAT;BHLHE22;FBLL1;RUNDC3A;SLC6A7;GAP43;SAMM50;GNG2;CALY;LRRTM1;PNOC;EIF2S3Y;CDK14;GRIA3;KCNJ3
dorsal root ganglia	34/541	0.0013963	0.0142733	0	0	1.82142	11.9739	TMEM200A;DCTN1;DCTN3;STMN2;ELAVL4;STMN3;PRKCZ;FSTL1;RGS4;UCHL1;ZFP14;TUBA1A;GNG2;TUBB3;SLC17A6;NEK1;TAC1;NEFH;CAMK2G;MAPK3;NTRK1;ANKRD29;CADPS;ANK2;KCNAB2;S100B;SGPP2;CPEB1;TUBB2B;TPPP3;DOK4;VWA1;TLN2;FGF12
cerebral cortex prefrontal	24/344	0.00178183	0.0163929	0	0	2.028	12.8374	MEG3;SYT5;GABRB2;EGR4;ARPP21;KCNC2;CRTC1;GABRA3;C030023E24RIK;CELF4;PTPRK;FMN2;MIAT;FBLL1;PHYHIP;RUNDC3A;CX3CL1;SYN1;SLC8A1;TMEM198;VSNL1;NOS1AP;APBB1;GRIA3
cerebellum	27/428	0.00394269	0.0329753	0	0	1.82066	10.079	GABRB2;SNAP25;KCNG4;KCNC3;NRXN1;NEURL1A;SLC25A27;TIAL1;GRM4;NDST3;DNER;GABRD;APPL2;SH3GL2;GABRA1;CADPS2;OSBPL6;BTBD17;SPHKAP;METRN;ANK2;GPR37L1;S100B;MAPK8IP1;SNRK;PITPNM1;MAP3K10
hippocampus	13/176	0.0120101	0.0920774	0	0	2.14083	9.46676	PRDM8;CLSTN2;LRRN2;KCNC2;NRXN1;BHLHE22;KCNAB2;SEZ6L;BCR;GRIN2A;LRRTM1;CALM3;KCNJ3
cerebral cortex	20/349	0.0300775	0.212856	0	0	1.63366	5.72432	DPP10;GABRB2;GABRA1;ARPP21;KCNC2;NRXN1;GABRA3;C030023E24RIK;CX3CL1;SYN1;SLC8A1;TMEM198;VSNL1;SNHG11;PPME1;NOS1AP;SERPINI1;APBB1;GRIA3;KCNJ3
min6	19/361	0.0678104	0.430875	0	0	1.48985	4.00924	NECAB2;LRRC24;TSHZ3;BTBD17;KCNIP1;TSHZ1;RASGRF2;CNPY2;PDYN;SEZ6L;ADRA2A;NEURL1A;ENHO;EML5;CPEB1;LRFN4;TMEM215;RESP18;NKTR
pituitary	16/294	0.0702513	0.430875	0	0	1.54211	4.09533	MEG3;RIAN;SPHKAP;IRS4;GLT8D1;SLC38A10;PTPRK;USE1;MAPK8IP1;PCSK1N;DPYSL2;PEX6;RESP18;A330023F24RIK;DRD2;NKTR
retina	28/664	0.229949	0.999993	0	0	1.17731	1.73052	PRDM8;ZFP445;CAMK2D;KCNA5;FMN2;SEMA3F;BHLHE22;PLCXD2;GLS;ANAPC11;ADCY5;ZCCHC14;SLC25A27;DNPEP;STX3;QRFPR;EPHA5;TTC14;PLK5;ESRRG;ACSL3;EML5;PITPNM1;TMEM215;CROCC;A330023F24RIK;LUC7L3;GNB5
skeletal muscle	29/710	0.279363	0.999993	0	0	1.13767	1.4508	IPO13;ZFP106;RTN2;KCNG4;LDB3;PARK7;UQCR10;ECSIT;NEURL1A;DNAJC21;UBC;POLR2E;MYO18A;LRRFIP1;MRPS28;ZBTB17;PRKAB2;MAP2K2;CHCHD10;NDUFC1;DRAP1;THAP3;NDUFS7;PSME4;TMEM126A;CORO6;ALDOA;PVALB;PLEC
neuro2a	18/425	0.282203	0.999993	0	0	1.18028	1.4932	2410006H16RIK;OSBPL6;NCAPH2;DCAKD;GOT2;ELAVL4;ISLR2;9430015G10RIK;LSM4;WDR54;SREBF2;TIAL1;VGF;DDAH2;POLD2;NAA38;PSPH;VAT1L
B-cells GL7 positive Alum	6/142	0.410433	0.999993	0	0	1.17436	1.04582	COX8A;VPS18;UQCRQ;SLC25A19;EIF4H;EIF3H
mast cells IgE+antigen 6hr	6/146	0.436316	0.999993	0	0	1.14057	0.945978	RBM14;DPYSL2;DCAKD;NDST3;EIF4H;ANAPC11
B-cells GL7 negative KLH	8/212	0.504609	0.999993	0	0	1.04307	0.713431	COX8A;DPM3;CAMK2D;UQCRQ;COX17;HDDC3;MRPL11;TRAIP
iris	5/133	0.530839	0.999993	0	0	1.03879	0.657863	SMPD1;FMN1;NR2F2;GNB5;PTPRK
B-cells GL7negative Alum	13/379	0.620337	0.999993	0	0	0.943302	0.45042	COX8A;GTF3C1;RPS9;H3F3B;COX17;MRPL11;TMEM143;DPM3;IMPACT;PSME4;GUF1;EIF4H;SRSF11
pancreas	23/667	0.62803	0.999993	0	0	0.947853	0.440911	KCNH3;OSBPL6;BTBD17;KCNIP1;SLC35C2;NRXN1;GOT2;CCDC124;NPY1R;SLC38A10;DDX54;RAP1GAP;GLS;ADCY5;PTMS;ENHO;ZFP14;NDN;SRSF6;OGT;PFDN5;NKTR;BCL9L
microglia	3/90	0.638311	0.999993	0	0	0.91642	0.411408	C1QA;MRPL54;C1QC
C3H 10T1 2	5/155	0.666134	0.999993	0	0	0.885417	0.359713	NDUFS8;PDLIM2;PER3;NR2F1;CNPY2
adrenal gland	8/245	0.667583	0.999993	0	0	0.89628	0.36218	NISCH;ALDH2;TMEM200A;FASN;TESC;NR2F2;FAHD2A;TXN2
RAW 264 7	7/222	0.698333	0.999993	0	0	0.864287	0.310331	CX3CR1;CSF1R;BOLA2;ATPIF1;THOC1;ERP29;HDDC3
C2C12	5/167	0.72818	0.999993	0	0	0.819316	0.259893	PAN3;SUCLA2;NCAPH2;CAD;PTPRK
mammary gland non-lactating	6/201	0.740639	0.999993	0	0	0.816519	0.245153	ZFP106;RTN2;PHF2;LDB3;ALDOA;PVALB
uterus	4/141	0.756457	0.999993	0	0	0.774998	0.21631	LCN2;TNRC18;NR2F2;ESR1
mIMCD-3	9/300	0.763584	0.999993	0	0	0.82002	0.221185	CDH6;GTF3C1;LRFN4;INTS1;VPS72;BANF1;PTPRK;MET;MRPL11
macrophage bone marrow 24h LPS	17/551	0.785581	0.999993	0	0	0.842689	0.203368	SF3B5;ZBTB17;SMARCD1;SLC32A1;SPHK2;NRXN1;RHOG;ESRRG;NISCH;NEURL1A;1700037H04RIK;PRDX5;POR;GNG2;LGALS8;PLTP;SLC12A9
3T3-L1	5/181	0.789506	0.999993	0	0	0.753591	0.17811	CWC22;NPY1R;FSCN1;SLIT2;OTUB1
stem cells HSC	5/186	0.808608	0.999993	0	0	0.732581	0.15563	SUCLA2;FOS;MCM6;RAMP1;ZFP760
bone	4/157	0.825257	0.999993	0	0	0.693372	0.133169	PRDX2;SLC25A37;ALAS2;TMCC2
lymph nodes	2/90	0.842579	0.999993	0	0	0.603137	0.10331	FSCN1;LIME1
cornea	12/427	0.852533	0.999993	0	0	0.764866	0.12203	DDR1;KCNH3;ANKRD29;RBM15B;SPHK2;BAD;WWC1;PSMB1;DNAJC21;GLT8D1;MBP;TKT
osteoblast day14	8/301	0.85772	0.999993	0	0	0.722845	0.11094	ADAMTS4;SFRP1;CHPF;TMEM200A;COL11A1;ID3;SLC38A10;FSTL1
Baf3	12/440	0.877806	0.999993	0	0	0.741123	0.0965903	ENHO;RBM25;2410006H16RIK;GSN;RPL14;RPL13A;RPL37;MCM6;B9D2;RAMP1;ST3GAL2;HDDC3
spleen	2/100	0.881999	0.999993	0	0	0.54131	0.0679694	RBM39;SCAP
bone marrow	11/413	0.887096	0.999993	0	0	0.723285	0.0866509	ALAD;PRDX2;SLC25A37;ALAS2;GDA;ATPIF1;TMCC2;JOSD2;PABPC1;YPEL4;BCL9L
ciliary bodies	8/317	0.89209	0.999993	0	0	0.684838	0.0782005	PER3;TNRC18;NR2F2;PTPRK;FMN2;CLEC18A;ATP9A;KCNJ3
mammary gland lact	2/104	0.895044	0.999993	0	0	0.519974	0.0576562	GJB6;PIK3R1
macrophage bone marrow 0hr	4/180	0.895287	0.999993	0	0	0.602036	0.0665915	CSF1R;LPL;ARPC4;C1QC
mast cells	14/515	0.895781	0.999993	0	0	0.737866	0.0812088	ZFP106;CX3CR1;H3F3B;LAPTM5;NPY1R;SREBF2;LMF1;NDST3;ASPHD2;STX3;B9D2;JUNB;ST3GAL2;ITM2C
granulocytes mac1+gr1+	15/557	0.909583	0.999993	0	0	0.730199	0.0692	KCNH3;FIS1;RNASEK;1700047M11RIK;FBLL1;SLC8A1;CACNG7;RBM15B;NR4A3;DMWD;ADPRH;TNRC18;CALM3;FCGR2B;SLC12A9
osteoclasts	2/110	0.912115	0.999993	0	0	0.490933	0.0451603	ATP6V1G1;TMEM65
T-cells CD4+	4/191	0.919058	0.999993	0	0	0.566296	0.0477987	NSG2;STK38;ABCB9;RPS10
osteoblast day21	6/264	0.92006	0.999993	0	0	0.615098	0.051248	SFRP1;COL11A1;TMEM119;ID3;SLC38A10;FSTL1
lens	27/947	0.922492	0.999993	0	0	0.771747	0.0622618	PHF2;PARK7;SRP14;SIPA1L3;ADCY5;PSMD9;PSMB1;HCFC1R1;RPS3;ROMO1;ANKRD29;FIS1;PRKAB2;PLK5;MAP2K2;SNHG8;MRPL28;ANK2;SNHG6;ATP1B1;1700037H04RIK;SFRP1;UQCRQ;DMWD;BOLA2;CALM3;PFDN5
adipose white	4/199	0.933186	0.999993	0	0	0.542836	0.0375376	MID1IP1;CAD;BMYC;CLU
salivary gland	12/480	0.93447	0.999993	0	0	0.67634	0.0458394	BCKDHA;NRBP2;PER3;TESC;WWC1;PSME4;SLC38A10;PABPC1;SLIT2;CLEC2D;NKTR;BCL9L
T-cells CD8+	3/166	0.942732	0.999993	0	0	0.487195	0.0287316	NSG2;STK38;LIME1
osteoblast day5	3/175	0.955149	0.999993	0	0	0.461485	0.0211764	TMEM200A;COL11A1;ID3
retinal pigment epithelium	11/473	0.958699	0.999993	0	0	0.627351	0.0264603	CAMK2D;LRP1;PITPNM1;SMPD1;WWC1;ZFP811;STX3;GNB5;MET;TRHDE;APPL2
thymocyte DP CD4+CD8+	9/410	0.963758	0.999993	0	0	0.591628	0.0218397	PHF2;RBM14;PAN3;ARPP21;STK38;SERPINI1;RAMP1;SLC8A1;SOD1
dendritic cells lymphoid CD8a+	2/142	0.966917	0.999993	0	0	0.378087	0.01272	SRSF11;ATOX1
NK cells	16/669	0.973245	0.999993	0	0	0.643557	0.017453	CREBZF;PHF2;RBM39;RBM25;NOTCH1;SELPLG;TSHZ3;ATP11B;PIK3R1;ATP1B1;EFR3A;PPP3CC;PAN3;LRRFIP1;ARGLU1;BCL9L
macrophage peri LPS thio 0hrs	7/353	0.973878	0.999993	0	0	0.533366	0.0141178	VPS18;1700037H04RIK;ATP6V1G1;TMEM65;LRP1;FAM20C;MFGE8
lung	7/354	0.974444	0.999993	0	0	0.531801	0.0137673	CLDN5;EFNB1;GSN;KCTD10;RASGRF2;SEMA3F;PLTP
B-cells GL7 positive KLH	3/207	0.981746	0.999993	0	0	0.388443	0.00715607	GTF3C1;VPS18;UQCRQ
eyecup	20/828	0.981905	0.999993	0	0	0.648374	0.0118397	DDR1;KCNH3;ZFP523;OSBPL6;LRP1;PITPNB;THOC1;GLT8D1;FMN1;NR2F2;ATP1B1;WDR54;TMEM143;PSMD9;SLC6A7;ALDH2;NDST3;DNAJC21;CALM3;ATP9A
embryonic stem line V26 2 p16	17/728	0.982352	0.999993	0	0	0.626928	0.011163	ZFP428;SLC35C2;RCC2;DCAKD;CAD;RPL13A;ENHO;FBL;ZMYM1;HSF2;DNAJC21;NHP2;POLR2E;DCTPP1;NOMO1;MCM2;AVPI1
mega erythrocyte progenitor	12/562	0.984826	0.999993	0	0	0.572995	0.00876142	SMARCD1;OST4;RBM14;SAMM50;D8ERTD738E;INTS1;RPL14;THOC1;MRPL28;MCM6;RPS21;MCM2
MEF	5/300	0.985455	0.999993	0	0	0.446798	0.00654644	GTF3C1;CAD;POLR2E;SLIT2;BCL9L
macrophage peri LPS thio 7hrs	16/707	0.98598	0.999993	0	0	0.606925	0.0085692	IGSF8;ATP6V0B;RAB5C;POU3F1;PSMB6;ENHO;NR4A3;ADORA2A;TMEM215;NDN;FAM20C;STX3;LGALS8;TAC1;MET;GABRD
follicular B-cells	13/603	0.986294	0.999993	0	0	0.578235	0.00798004	CREBZF;GRCC10;RBM39;RBM25;DDX54;CLK4;LMF1;PRPF39;PPDPF;CD38;PKIG;SF3B1;OGT
lacrimal gland	17/749	0.987673	0.999993	0	0	0.608253	0.00754424	EPHA5;DDR1;OSBPL6;SLC35C2;WWC1;NRXN1;SLC38A10;ATP1A3;CNPY2;PIK3R1;CELSR1;PDCD4;TMBIM6;SLC39A7;P4HB;PFDN5;NOMO1
macrophage bone marrow 2hr LPS	6/365	0.992074	0.999993	0	0	0.439701	0.00349894	SLC32A1;CDC37;EIF3H;MRPL54;GLS;C1QC
B-cells marginal zone	6/380	0.994556	0.999993	0	0	0.421731	0.00230207	RBM15B;CAMK2D;CRTC1;YBX1;SRSF11;AHDC1
kidney	10/554	0.996157	0.999993	0	0	0.481566	0.00185418	GRHPR;PRDX5;OSBPL6;GPX1;PCX;CHUK;KCNJ16;TMBIM6;FAHD2A;SLC8A1
ovary	1/153	0.996554	0.999993	0	0	0.17377	0.000599862	SCAP
mast cells IgE	11/598	0.996604	0.999993	0	0	0.490478	0.00166835	RBM14;NDST3;ADPRH;DNAJC21;NMT2;SLC38A10;STX3;ATP1B1;ARGLU1;ANAPC11;PTPN3
macrophage peri LPS thio 1hrs	11/598	0.996604	0.999993	0	0	0.490478	0.00166835	VPS18;SF3B5;EGR2;SLC32A1;NRXN1;FAM20C;ATP1A3;STX3;MFGE8;JUNB;LMF1
mast cells IgE+antigen 1hr	3/265	0.996735	0.999993	0	0	0.301532	0.000986131	NR4A3;RPS3;PLEC
embryonic stem line Bruce4 p13	18/876	0.997695	0.999993	0	0	0.546493	0.00126088	RBM25;SLC32A1;ZFP428;RCC2;CCDC124;THOC1;DOHH;TRAIP;ZMYM1;CLPP;ASNA1;BOLA2;NHP2;POLR2E;MCM6;DCTPP1;SNRPA;AVPI1
macrophage bone marrow 6hr LPS	14/730	0.997722	0.999993	0	0	0.510387	0.00116397	ZFP106;SPHK2;ZFP811;TET2;MRPL54;GLS;DISP2;SAMM50;NR4A3;DNAJC21;SERPINI1;FCGR2B;NKTR;SLC12A9
stomach	2/249	0.998991	0.999993	0	0	0.213102	0.000215057	1810037I17RIK;ESRRG
dendritic cells myeloid CD8a-	1/188	0.999062	0.999993	0	0	0.140987	0.000132297	ATOX1
nih 3T3	2/252	0.999088	0.999993	0	0	0.210512	0.00019205	NR2F2;YBX1
bladder	1/195	0.999277	0.999993	0	0	0.13585	9.82768e-05	ENHO
intestine small	6/466	0.999437	0.999993	0	0	0.341326	0.000192145	EFNB1;GDA;PPP1R16A;TNRC18;HDHD3;SGPP2
thymocyte SP CD4+	1/203	0.999463	0.999993	0	0	0.130415	7.0101e-05	TMEM164
umbilical cord	1/208	0.999554	0.999993	0	0	0.127232	5.68147e-05	RIAN
prostate	3/329	0.999554	0.999993	0	0	0.24152	0.000107704	PER3;PDLIM2;MT2
liver	17/928	0.999616	0.999993	0	0	0.484021	0.000185843	ALDH1L1;STARD10;SLC30A10;HDHD3;PRKCZ;WDR54;SOD1;VTN;GRHPR;ALDH2;DDT;PEX6;TMEM205;FKBP8;EIF3H;APOE;C2CD2L
dendritic plasmacytoid B220+	1/214	0.999643	0.999993	0	0	0.123609	4.4198e-05	MGAT1
placenta	3/411	0.999965	0.999993	0	0	0.192144	6.65455e-06	RBM25;SLC2A1;SEMA3F
epidermis	2/373	0.999982	0.999993	0	0	0.140952	2.49218e-06	CELSR1;NEAT1
intestine large	2/374	0.999983	0.999993	0	0	0.140566	2.41798e-06	FAM102A;SGPP2
testis	45/3059	0.999993	0.999993	0	0	0.357032	2.37974e-06	IPO13;PHF2;CRTC1;TESK1;GLT8D1;FMN1;ABCB9;9430015G10RIK;1700003E16RIK;TTBK1;LMF1;C1QTNF4;ZNHIT1;PPP3CC;NDST3;SCAND1;LGALS8;AAMP;GIT1;UBXN6;TSC22D4;EGLN2;GPX4;BAD;PPP1R16A;TMC7;SEZ6L;DNAJC15;GNL1;WDR54;ATOX1;YIF1B;SOD1;1700037H04RIK;PSME4;PITPNM2;NMT2;CALM3;ITGB1BP1;RABL2;TLN2;ALDOA;4930413G21RIK;CSNK1G2;AHDC1

## Sheet: D. Allen Brain Atlas up
EnrichR enrichment for Allen Brain Atlas up Genes
red highlight: adj P-value < 0.05; blue highlight: P-value <0.05
Term	Overlap	P-value	Adjusted P-value	Old P-value	Old Adjusted P-value	Odds Ratio	Combined Score	Genes
mantle zone of Str	39/301	5.29167e-12	1.15517e-08	0	0	4.12563	107.121	NECAB2;LPL;KCNA5;SERPINA9;PHYHIP;ADCY5;RGS4;SLC25A27;GNG7;FAM110B;PENK;AP1S1;DLGAP3;DRD2;TAC1;GABRD;RXRG;NTRK1;KCNJ4;EGR4;ARPP21;TESC;FBXL16;PDYN;GPR6;BAIAP2;PPP1CA;TRAIP;BCR;EML5;INF2;ADORA2A;PPP1R1B;ASPHD2;ITGB1BP1;GNB5;PTPN5;NGEF;C2CD2L
central subpallium (classic basal ganglia)	38/301	2.19225e-11	1.59523e-08	0	0	3.99852	98.1376	NECAB2;LPL;KCNA5;SERPINA9;PHYHIP;ADCY5;RGS4;SLC25A27;GNG7;FAM110B;PENK;AP1S1;DLGAP3;DRD2;TAC1;GABRD;NTRK1;KCNJ4;EGR4;ARPP21;TESC;FBXL16;PDYN;GPR6;BAIAP2;PPP1CA;TRAIP;BCR;EML5;INF2;ADORA2A;PPP1R1B;ASPHD2;ITGB1BP1;GNB5;PTPN5;NGEF;C2CD2L
striatum (corpus striatum)	38/301	2.19225e-11	1.59523e-08	0	0	3.99852	98.1376	NECAB2;LPL;KCNA5;SERPINA9;PHYHIP;ADCY5;RGS4;SLC25A27;GNG7;FAM110B;PENK;AP1S1;DLGAP3;DRD2;TAC1;GABRD;NTRK1;KCNJ4;EGR4;ARPP21;TESC;FBXL16;PDYN;GPR6;BAIAP2;PPP1CA;TRAIP;BCR;EML5;INF2;ADORA2A;PPP1R1B;ASPHD2;ITGB1BP1;GNB5;PTPN5;NGEF;C2CD2L
Caudoputamen	37/301	8.8075e-11	2.74668e-08	0	0	3.8727	89.6641	NECAB2;SMARCD1;LPL;SERPINA9;PHYHIP;ADCY5;RGS4;SLC25A27;GNG7;FAM110B;PENK;AP1S1;DLGAP3;DRD2;GABRD;NTRK1;KCNJ4;EGR4;ARPP21;TESC;FBXL16;PDYN;GPR6;BAIAP2;PPP1CA;TRAIP;BCR;EML5;INF2;ADORA2A;PPP1R1B;ASPHD2;ITGB1BP1;GNB5;PTPN5;NGEF;C2CD2L
Striatum dorsal region	37/301	8.8075e-11	2.74668e-08	0	0	3.8727	89.6641	NECAB2;SMARCD1;LPL;SERPINA9;PHYHIP;ADCY5;RGS4;SLC25A27;GNG7;FAM110B;PENK;AP1S1;DLGAP3;DRD2;GABRD;NTRK1;KCNJ4;EGR4;ARPP21;TESC;FBXL16;PDYN;GPR6;BAIAP2;PPP1CA;TRAIP;BCR;EML5;INF2;ADORA2A;PPP1R1B;ASPHD2;ITGB1BP1;GNB5;PTPN5;NGEF;C2CD2L
intermediate stratum of Str	37/301	8.8075e-11	2.74668e-08	0	0	3.8727	89.6641	NECAB2;LPL;SERPINA9;PHYHIP;ADCY5;RGS4;SLC25A27;GNG7;FAM110B;PENK;AP1S1;DLGAP3;DRD2;TAC1;GABRD;NTRK1;KCNJ4;EGR4;ARPP21;TESC;FBXL16;PDYN;GPR6;BAIAP2;PPP1CA;TRAIP;BCR;EML5;INF2;ADORA2A;PPP1R1B;ASPHD2;ITGB1BP1;GNB5;PTPN5;NGEF;C2CD2L
putamen	37/301	8.8075e-11	2.74668e-08	0	0	3.8727	89.6641	NECAB2;SMARCD1;LPL;SERPINA9;PHYHIP;ADCY5;RGS4;SLC25A27;GNG7;FAM110B;PENK;AP1S1;DLGAP3;DRD2;TAC1;GABRD;NTRK1;KCNJ4;EGR4;ARPP21;TESC;FBXL16;PDYN;GPR6;PPP1CA;TRAIP;BCR;EML5;INF2;ADORA2A;PPP1R1B;ASPHD2;ITGB1BP1;GNB5;PTPN5;NGEF;C2CD2L
Striatum	35/301	1.29325e-09	3.52895e-07	0	0	3.6249	74.1877	NECAB2;LPL;KCNA5;SERPINA9;PHYHIP;ADCY5;GNG7;FAM110B;PENK;AP1S1;DLGAP3;DRD2;TAC1;GABRD;NTRK1;KCNJ4;EGR4;ARPP21;TESC;FBXL16;PDYN;GPR6;BAIAP2;PPP1CA;TRAIP;BCR;EML5;INF2;ADORA2A;PPP1R1B;ITGB1BP1;GNB5;PTPN5;NGEF;C2CD2L
subpallium	34/301	4.72025e-09	1.14492e-06	0	0	3.50289	67.1552	NECAB2;LPL;KCNA5;SERPINA9;PHYHIP;ADCY5;RGS4;GNG7;FAM110B;PENK;DLGAP3;DRD2;TAC1;GABRD;NTRK1;KCNJ4;EGR4;ARPP21;TESC;FBXL16;PDYN;GPR6;BAIAP2;PPP1CA;TRAIP;BCR;INF2;ADORA2A;PPP1R1B;ITGB1BP1;GNB5;PTPN5;NGEF;C2CD2L
Cerebral nuclei	33/301	1.66629e-08	3.6375e-06	0	0	3.3821	60.5737	NECAB2;LPL;KCNA5;SERPINA9;ADCY5;GNG7;FAM110B;PENK;DLGAP3;DRD2;TAC1;GABRD;RXRG;NTRK1;KCNJ4;EGR4;ARPP21;TESC;FBXL16;PDYN;GPR6;BAIAP2;PPP1CA;TRAIP;BCR;INF2;ADORA2A;PPP1R1B;ITGB1BP1;GNB5;PTPN5;NGEF;C2CD2L
Nucleus accumbens	32/301	5.68466e-08	1.03413e-05	0	0	3.26254	54.4286	NECAB2;GTF3C1;STXBP2;LPL;KCNA5;SERPINA9;ADCY5;GNG7;FAM110B;PENK;DRD2;TAC1;CRYM;GABRD;RXRG;NTRK1;ARPP21;TESC;FBXL16;PDYN;GPR6;BAIAP2;TRAIP;BCR;INF2;ADORA2A;PPP1R1B;PITPNM2;ITGB1BP1;PTPN5;NGEF;C2CD2L
Striatum ventral region	32/301	5.68466e-08	1.03413e-05	0	0	3.26254	54.4286	NECAB2;LPL;KCNA5;SERPINA9;ADCY5;GNG7;FAM110B;PENK;DRD2;TAC1;CRYM;GABRD;NTRK1;KCNJ4;ARPP21;TESC;FBXL16;PDYN;GPR6;BAIAP2;PPP1CA;TRAIP;BCR;INF2;ADORA2A;PPP1R1B;PITPNM2;ITGB1BP1;GNB5;PTPN5;NGEF;C2CD2L
ventral striatum	31/301	1.87276e-07	3.1448e-05	0	0	3.14417	48.7054	NECAB2;LPL;KCNA5;SERPINA9;ADCY5;GNG7;FAM110B;PENK;DRD2;TAC1;GABRD;MBD3;NTRK1;KCNJ4;EGR4;ARPP21;TESC;FBXL16;PDYN;GPR6;PPP1CA;TRAIP;BCR;INF2;ADORA2A;PPP1R1B;PITPNM2;ITGB1BP1;GNB5;PTPN5;NGEF
Bed nuclei of the stria terminalis, posterior division	29/301	1.82399e-06	0.000265452	0	0	2.911	38.4673	CAMK2D;ADCY5;TIAL1;EEF1B2;PCSK1N;ZMYM6;RPS3;NDN;RPS2;AAMP;GABRQ;CADPS2;WSB1;GPX1;SLC32A1;PCDHGC3;NR2F1;UNC5D;PDYN;ESR1;GAP43;ADORA2A;TMEM215;CROCC;PNOC;RPS21;PTPN5;SSBP4;ITM2C
intermediate stratum of Pal	29/301	1.82399e-06	0.000265452	0	0	2.911	38.4673	LPL;KCNA5;SERPINA9;TMEM164;ADCY5;RGS4;SLC25A27;GNG7;FAM110B;DRD2;GABRD;RXRG;MBD3;NTRK1;KCNJ4;GPX1;TESC;PDYN;GPR6;BAIAP2;PPP1CA;TRAIP;BCR;INF2;ADORA2A;PPP1R1B;ITGB1BP1;GNB5;PTPN5
Posterodorsal preoptic nucleus	28/301	5.38263e-06	0.000559537	0	0	2.79616	33.9239	ABHD8;SLC38A10;CLU;PCSK1N;RPS19;DNER;RPL14;SCAP;NDN;AAMP;GABRQ;WSB1;GPX1;SLC32A1;APLP1;RPL13A;UNC5D;ESR1;RPS26;GAP43;PITPNM1;TMEM215;CROCC;PNOC;ERP29;PFDN5;MAP3K11;SSBP4
intermediate stratum of SeStr	28/301	5.38263e-06	0.000559537	0	0	2.79616	33.9239	IPO13;GTF3C1;PHF2;STXBP2;LPL;KCNA5;SERPINA9;YBX1;RAP1GAP;ADCY5;GNG7;PENK;DRD2;TAC1;CHUK;TESC;PDYN;GPR6;TRAIP;BCR;INF2;ADORA2A;PPP1R1B;PITPNM2;PTPN5;NGEF;C2CD2L;SSBP4
laterostriatal stripe	28/301	5.38263e-06	0.000559537	0	0	2.79616	33.9239	NECAB2;LPL;SERPINA9;ADCY5;RGS4;ADAMTS4;GNG7;FAM110B;PENK;DLGAP3;DRD2;GABRD;UBXN6;ARPP21;TESC;FBXL16;PDYN;GPR6;PPP1CA;TRAIP;BCR;INF2;ADORA2A;KCTD10;TMEM126A;ASPHD2;GNB5;NGEF
polymorph layer of TuStr	28/301	5.38263e-06	0.000559537	0	0	2.79616	33.9239	NECAB2;LPL;KCNA5;ABCB9;SERPINA9;YBX1;ADCY5;GNG7;PENK;ROMO1;DRD2;TAC1;GABRD;FIS1;EGLN2;EGR4;TESC;AARSD1;PDYN;GPR6;PPP1CA;TRAIP;BCR;INF2;ADORA2A;PITPNM2;GNB5;NGEF
septopallidal core nucleus	28/301	5.38263e-06	0.000559537	0	0	2.79616	33.9239	LPL;KCNA5;SERPINA9;ADCY5;TIAL1;GNG7;FAM110B;PENK;DRD2;TAC1;CRYM;SF3B1;NTRK1;TESC;PDYN;GPR6;BAIAP2;TRAIP;INF2;ADORA2A;CROCC;PPP1R1B;PITPNM2;ITGB1BP1;PTPN5;C2CD2L;SSBP4;ITM2C
striatal part of olfactory tuberculum	28/301	5.38263e-06	0.000559537	0	0	2.79616	33.9239	NECAB2;LPL;KCNA5;ABCB9;SERPINA9;YBX1;ECSIT;ADCY5;GNG7;PENK;ROMO1;DRD2;TAC1;RXRG;KCNJ4;FIS1;EGLN2;EGR4;FBXL16;GPR6;PPP1CA;TRAIP;BCR;INF2;ADORA2A;PITPNM2;GNB5;NGEF
Bed nuclei of the stria terminalis	27/301	1.52827e-05	0.00111207	0	0	2.68247	29.7453	CAMK2D;KCNA5;SERPINA9;ADCY5;TIAL1;EEF1B2;PENK;RPS3;RPS2;DRD2;CRYM;AAMP;GABRQ;WSB1;SLC32A1;PDYN;GPR6;ESR1;GAP43;ADORA2A;TMEM215;PNOC;ITGB1BP1;RPS21;PTPN5;SSBP4;ITM2C
Bed nuclei of the stria terminalis, anterior division	27/301	1.52827e-05	0.00111207	0	0	2.68247	29.7453	KCNA5;SERPINA9;ADCY5;TIAL1;EEF1B2;PENK;DRD2;CRYM;AAMP;GABRQ;WSB1;SLC32A1;PDYN;GPR6;ESR1;TRAIP;GRHPR;GAP43;INF2;ADORA2A;TMEM215;PNOC;ITGB1BP1;RPS21;PTPN5;SSBP4;ITM2C
Fundus of striatum	27/301	1.52827e-05	0.00111207	0	0	2.68247	29.7453	NECAB2;SELPLG;LPL;KCNA5;SERPINA9;SEMA3F;TMEM164;ADCY5;FAM110B;PENK;DRD2;TAC1;GABRD;NTRK1;KCNJ4;SLC32A1;TESC;PDYN;GPR6;PPP1CA;TRAIP;BCR;INF2;ADORA2A;CDC37;PPP1R1B;C1QC
Pallidum, caudal region	27/301	1.52827e-05	0.00111207	0	0	2.68247	29.7453	CAMK2D;KCNA5;SERPINA9;ADCY5;TIAL1;EEF1B2;PENK;RPS3;RPS2;DRD2;CRYM;AAMP;GABRQ;WSB1;SLC32A1;PDYN;GPR6;ESR1;GAP43;ADORA2A;TMEM215;PNOC;ITGB1BP1;RPS21;PTPN5;SSBP4;ITM2C
accumbens nucleus, shell domain	27/301	1.52827e-05	0.00111207	0	0	2.68247	29.7453	IPO13;GTF3C1;PHF2;LPL;KCNA5;SERPINA9;YBX1;RAP1GAP;ADCY5;GNG7;PENK;DRD2;TAC1;CHUK;TESC;PDYN;GPR6;TRAIP;BCR;INF2;ADORA2A;PPP1R1B;PITPNM2;PTPN5;NGEF;C2CD2L;SSBP4
mantle zone of SeStr	27/301	1.52827e-05	0.00111207	0	0	2.68247	29.7453	GTF3C1;PHF2;LPL;KCNA5;SERPINA9;ADCY5;GNG7;PENK;DRD2;TAC1;CRYM;NTRK1;ARPP21;TESC;PDYN;GPR6;TRAIP;BCR;INF2;ADORA2A;PPP1R1B;PITPNM2;ITGB1BP1;MFGE8;PTPN5;NGEF;C2CD2L
periventricular stratum of SeStr	27/301	1.52827e-05	0.00111207	0	0	2.68247	29.7453	NECAB2;GTF3C1;LPL;KCNA5;SERPINA9;CLU;ADCY5;GNG7;FAM110B;PENK;DRD2;TAC1;CRYM;ARPP21;TESC;PDYN;GPR6;TRAIP;INF2;ADORA2A;PPP1R1B;PITPNM2;ITGB1BP1;MFGE8;PTPN5;NGEF;C2CD2L
septostriatal transition area (accumbens)	27/301	1.52827e-05	0.00111207	0	0	2.68247	29.7453	GTF3C1;PHF2;LPL;KCNA5;SERPINA9;ADCY5;GNG7;PENK;DRD2;TAC1;CRYM;NTRK1;ARPP21;TESC;PDYN;GPR6;TRAIP;BCR;INF2;ADORA2A;PPP1R1B;PITPNM2;ITGB1BP1;MFGE8;PTPN5;NGEF;C2CD2L
superficial stratum of Str	27/301	1.52827e-05	0.00111207	0	0	2.68247	29.7453	NECAB2;LPL;KCNA5;ABCB9;SERPINA9;YBX1;ECSIT;ADCY5;GNG7;PENK;ROMO1;DRD2;TAC1;KCNJ4;FIS1;EGLN2;EGR4;FBXL16;GPR6;PPP1CA;TRAIP;BCR;INF2;ADORA2A;PITPNM2;GNB5;NGEF
Bed nuclei of the stria terminalis, posterior division, interfascicular nucleus	26/301	4.17053e-05	0.00260122	0	0	2.56991	25.9172	CAMK2D;ADCY5;RPS15;EEF1B2;PCSK1N;ZMYM6;NDN;AAMP;GABRQ;CADPS2;WSB1;GPX1;SLC32A1;NR2F1;RPL13A;UNC5D;PDYN;SEZ6L;ESR1;RPS26;GAP43;TMEM215;PNOC;ERP29;RPS21;SSBP4
accumbens nucleus, core domain	26/301	4.17053e-05	0.00260122	0	0	2.56991	25.9172	NECAB2;GTF3C1;LPL;KCNA5;SERPINA9;ADCY5;GNG7;FAM110B;PENK;DRD2;TAC1;CRYM;ARPP21;TESC;PDYN;GPR6;TRAIP;INF2;ADORA2A;PPP1R1B;PITPNM2;ITGB1BP1;MFGE8;PTPN5;NGEF;C2CD2L
corticoid layer of TuStr	26/301	4.17053e-05	0.00260122	0	0	2.56991	25.9172	NECAB2;LPL;KCNA5;ABCB9;SERPINA9;YBX1;ECSIT;ADCY5;GNG7;PENK;ROMO1;DRD2;TAC1;RXRG;FIS1;EGLN2;EGR4;GPR6;PPP1CA;TRAIP;BCR;INF2;ADORA2A;PITPNM2;GNB5;NGEF
intermediate stratum of SePal	26/301	4.17053e-05	0.00260122	0	0	2.56991	25.9172	LPL;KCNA5;SERPINA9;ADCY5;TIAL1;GNG7;FAM110B;PENK;DRD2;TAC1;CRYM;RXRG;NTRK1;TESC;PDYN;GPR6;BAIAP2;TRAIP;INF2;ADORA2A;PPP1R1B;PITPNM2;ITGB1BP1;PTPN5;C2CD2L;SSBP4
ventral endopiriform nucleus	26/301	4.17053e-05	0.00260122	0	0	2.56991	25.9172	NECAB2;SELPLG;LPL;SERPINA9;CLU;ADCY5;TMEM242;C1QTNF4;ARHGDIA;PENK;DNER;CWC22;DRD2;TAC1;PSPH;EGLN2;EGR4;ARPP21;GPR6;PPP1CA;ADORA2A;CDC37;NMT2;GNB5;NGEF;TOMM6
lateral posterior nucleus	41/602	8.80201e-05	0.00533744	0	0	1.99955	18.6717	PHF2;KCNC2;CRTC1;LPL;KCNA5;SIPA1L3;RPS15;EEF1B2;GNG10;PCSK1N;FAM110B;RESP18;NDN;SBF1;AAMP;RPS10;UBXN6;VAT1L;PPFIA2;GABRQ;TTC14;WSB1;PLK5;GPX1;SLC32A1;LRRN2;RCC2;DCAKD;PCDHGC3;ACSL3;ESR1;PNOC;ERP29;FAM20C;TMBIM6;YPEL4;RPS21;MAP3K11;SSBP4;PTPN3;AVPI1
Bed nuclei of the stria terminalis, anterior division, anteromedial area	25/301	0.000109267	0.00542112	0	0	2.45846	22.4254	CAMK2D;KCNA5;SERPINA9;CLU;ADCY5;TIAL1;EEF1B2;PENK;RPS2;DRD2;CRYM;GABRQ;WSB1;SLC32A1;PCDHGC3;PDYN;GPR6;ESR1;GAP43;ADORA2A;PNOC;ITGB1BP1;RPS21;SSBP4;ITM2C
Bed nuclei of the stria terminalis, anterior division, magnocellular nucleus	25/301	0.000109267	0.00542112	0	0	2.45846	22.4254	CLU;RPS15;PCSK1N;RPS19;RESP18;DNER;RPL14;NDN;AAMP;GABRQ;CADPS2;WSB1;SLC32A1;APLP1;PCDHGC3;RPL13A;ESR1;RPS26;GAP43;TMEM215;PNOC;ERP29;RPS21;PFDN5;SSBP4
Bed nuclei of the stria terminalis, posterior division, principal nucleus	25/301	0.000109267	0.00542112	0	0	2.45846	22.4254	CAMK2D;TMEM200A;ADCY5;TIAL1;EEF1B2;ZMYM6;RPS3;RPS2;GABRQ;CADPS2;WSB1;GPX1;SLC32A1;PCDHGC3;UNC5D;PDYN;ESR1;GAP43;TMEM215;CROCC;PNOC;RPS21;PTPN5;SSBP4;ITM2C
Major island of Calleja	25/301	0.000109267	0.00542112	0	0	2.45846	22.4254	COL11A1;KCNA5;SERPINA9;RAP1GAP;ADCY5;TIAL1;GNG7;PENK;DRD2;TAC1;SF3B1;NTRK1;SLC32A1;SPHK2;TMC7;PDYN;GPR6;TRAIP;INF2;ADORA2A;PPP1R1B;PTPN5;C2CD2L;MAP3K11;SSBP4
external globus pallidum	25/301	0.000109267	0.00542112	0	0	2.45846	22.4254	LPL;KCNA5;SERPINA9;ADCY5;RGS4;SLC25A27;GNG7;FAM110B;DRD2;GABRD;NTRK1;KCNJ4;GPX1;TESC;PDYN;GPR6;PPP1CA;TRAIP;BCR;INF2;ADORA2A;PPP1R1B;ITGB1BP1;GNB5;PTPN5
intermediate stratum of VPrP	25/301	0.000109267	0.00542112	0	0	2.45846	22.4254	NECAB2;SELPLG;LPL;SERPINA9;CLU;ADCY5;GNG2;ARHGDIA;PENK;CWC22;DRD2;TAC1;PSPH;MBD3;EGR4;ARPP21;FBXL16;GPR6;SREBF2;PPP1CA;PRPF39;ADORA2A;NMT2;GNB5;NGEF
island of Calleja major	25/301	0.000109267	0.00542112	0	0	2.45846	22.4254	IPO13;GTF3C1;PHF2;LPL;KCNA5;SERPINA9;ADCY5;TIAL1;GNG7;PENK;DRD2;TAC1;CHUK;TESC;PDYN;GPR6;TRAIP;INF2;ADORA2A;PPP1R1B;PITPNM2;ITGB1BP1;PTPN5;C2CD2L;SSBP4
periventricular stratum of PO2	25/301	0.000109267	0.00542112	0	0	2.45846	22.4254	BEX1;EEF1B2;PCSK1N;RPS19;RESP18;RPL14;NDN;RPS2;VAT1L;GABRQ;WSB1;APLP1;UNC5D;NR2F2;ESR1;RPS26;PITPNM1;TMEM215;GNB2;PNOC;ERP29;PLXNB2;RPS21;SSBP4;ITM2C
Bed nuclei of the stria terminalis, anterior division, oval nucleus	24/301	0.000274529	0.011525	0	0	2.34813	19.2557	SMARCD1;TESC;KCNA5;SERPINA9;PDYN;GPR6;BAIAP2;ADCY5;TRAIP;SLC25A27;GRHPR;INF2;ADORA2A;GNG7;FAM110B;PENK;PPP1R1B;ITGB1BP1;CCNL1;DRD2;CRYM;GABRD;PTPN5;C2CD2L
Pallidum	24/301	0.000274529	0.011525	0	0	2.34813	19.2557	NTRK1;GPX1;SLC32A1;TMC7;KCNA5;ATP11B;NR2F2;SERPINA9;PDYN;GPR6;ESR1;TMEM164;ADCY5;BCR;INF2;TMEM65;ADORA2A;DRD2;TAC1;CRYM;GABRD;RXRG;SSBP4;C1QC
caudate nucleus	24/301	0.000274529	0.011525	0	0	2.34813	19.2557	NECAB2;ARPP21;TESC;LPL;SERPINA9;FBXL16;PDYN;GPR6;ADCY5;PPP1CA;TRAIP;BCR;RGS4;SLC25A27;INF2;ADORA2A;GNG7;FAM110B;PPP1R1B;GNB5;DRD2;GABRD;PTPN5;NGEF
mantle zone of Pal	24/301	0.000274529	0.011525	0	0	2.34813	19.2557	NTRK1;KCNJ4;TESC;LPL;KCNA5;SERPINA9;PDYN;GPR6;BAIAP2;TMEM164;ADCY5;PPP1CA;TRAIP;BCR;INF2;ADORA2A;GNG7;FAM110B;ITGB1BP1;GNB5;DRD2;TAC1;GABRD;PTPN5
pallidum (globus pallidus complex)	24/301	0.000274529	0.011525	0	0	2.34813	19.2557	NTRK1;KCNJ4;TESC;LPL;KCNA5;SERPINA9;PDYN;GPR6;BAIAP2;TMEM164;ADCY5;PPP1CA;TRAIP;BCR;INF2;ADORA2A;GNG7;FAM110B;ITGB1BP1;GNB5;DRD2;TAC1;GABRD;PTPN5
paraventricular nucleus, cap part	24/301	0.000274529	0.011525	0	0	2.34813	19.2557	DDR1;GABRQ;RBM14;WSB1;RPS8;LAPTM5;ABHD8;KCNA5;SLC30A10;ESR1;SOD1;CST3;CLDN5;PCSK1N;GAP43;PITPNM1;RPL14;ERP29;NDN;RPS2;STX3;FCGR2B;VAT1L;NKTR
periventricular stratum of Str	24/301	0.000274529	0.011525	0	0	2.34813	19.2557	NECAB2;ARPP21;TESC;LPL;SERPINA9;FBXL16;PDYN;GPR6;ADCY5;PPP1CA;TRAIP;BCR;RGS4;SLC25A27;INF2;ADORA2A;GNG7;FAM110B;PPP1R1B;GNB5;DRD2;GABRD;PTPN5;NGEF
substantia innominata/basal nucleus, transitional part	24/301	0.000274529	0.011525	0	0	2.34813	19.2557	NTRK1;C1QA;WSB1;SLC32A1;KCNA5;ATP11B;SERPINA9;PDYN;GPR6;ADCY5;TIAL1;RPS15;EEF1B2;ADORA2A;PENK;NDN;ITGB1BP1;DRD2;CRYM;RPS21;AAMP;VAT1L;SSBP4;C1QC
intermediate stratum of DG	39/597	0.000303141	0.012486	0	0	1.90696	15.4489	IPO13;CLSTN2;RPLP0;LPL;SERPINA9;SIPA1L3;TMEM164;ADCY5;RPS15;GNG2;TMEM65;DRD2;RPS10;GABRD;PPFIA2;MAPK3;NTRK1;GPX1;SLC32A1;LRRN2;SLC35C2;ISLR2;ESRRG;PDYN;GPR6;BCR;NCOR2;INF2;NR4A3;ADORA2A;PITPNM2;PDCD4;ASPHD2;SREK1;PABPC1;FAU;SRSF6;PPIB;PLEC
Bed nuclei of the stria terminalis, anterior division, anterolateral area	23/301	0.000660643	0.0221874	0	0	2.23888	16.3938	NTRK1;TESC;KCNA5;SERPINA9;PDYN;GPR6;BAIAP2;ADCY5;TRAIP;TIAL1;GRHPR;INF2;ADORA2A;FAM110B;PENK;PPP1R1B;ITGB1BP1;CCNL1;MFGE8;DRD2;CRYM;PTPN5;C2CD2L
Bed nuclei of the stria terminalis, anterior division, juxtacapsular nucleus	23/301	0.000660643	0.0221874	0	0	2.23888	16.3938	TESC;KCNA5;SERPINA9;PDYN;GPR6;BAIAP2;ADCY5;PPP1CA;TRAIP;RGS4;GRHPR;INF2;ADORA2A;GNG7;FAM110B;PPP1R1B;ITGB1BP1;CCNL1;DRD2;GABRD;RXRG;PTPN5;C2CD2L
Medial geniculate complex, dorsal part	23/301	0.000660643	0.0221874	0	0	2.23888	16.3938	MRPS28;VPS18;ZBTB17;PLK5;EGR4;LRRN2;KCNC2;SPHK2;CRTC1;DCAKD;SIPA1L3;RPL18A;LRRTM1;FAM110B;FAM20C;PABPC1;SREK1;MCM6;GABRD;TOMM6;PPFIA2;CDH19;PTPN3
Paraventricular hypothalamic nucleus	23/301	0.000660643	0.0221874	0	0	2.23888	16.3938	DDR1;GABRQ;FIS1;WSB1;RPS8;LAPTM5;SLC2A1;KCNA5;UNC5D;PGD;CLU;ESR1;TIAL1;CST3;CLDN5;PCSK1N;GAP43;PITPNM1;RPS3;ERP29;RPS2;AAMP;NKTR
Paraventricular hypothalamic nucleus, magnocellular division, medial magnocellular part	23/301	0.000660643	0.0221874	0	0	2.23888	16.3938	DDR1;GABRQ;WSB1;GPX1;ABHD8;SLC2A1;KCNA5;SLC30A10;ESR1;CST3;CLDN5;PCSK1N;RPS19;PITPNM1;RPL14;ERP29;SCAP;NDN;PLXNB2;RPS2;STX3;FCGR2B;NKTR
bed nucleus of the external capsule	23/301	0.000660643	0.0221874	0	0	2.23888	16.3938	NECAB2;MBD3;GTF3C1;EGR4;TESC;LPL;SERPINA9;FBXL16;GPR6;SREBF2;ADCY5;PPP1CA;BCR;PRPF39;GNG2;ADORA2A;KCTD10;GNG7;PENK;GNB5;DLGAP3;DRD2;NGEF
intermediate stratum of SeDg	23/301	0.000660643	0.0221874	0	0	2.23888	16.3938	NTRK1;WSB1;SLC32A1;KCNA5;ATP11B;SERPINA9;PDYN;GPR6;ADCY5;TIAL1;RPS15;EEF1B2;ADORA2A;PENK;NDN;ITGB1BP1;DRD2;CRYM;RPS21;AAMP;VAT1L;SSBP4;C1QC
lateral part of MPO	23/301	0.000660643	0.0221874	0	0	2.23888	16.3938	GABRQ;PCDHGC3;SLC38A10;RPL13A;UNC5D;RPL8;ESR1;RPS15;RPS26;EEF1B2;PCSK1N;RPS19;PITPNM1;TMEM215;RESP18;PNOC;RPL14;ERP29;NDN;RPS21;AAMP;MAP3K11;SSBP4
mantle zone of PO2	23/301	0.000660643	0.0221874	0	0	2.23888	16.3938	GABRQ;NTRK1;WSB1;UNC5D;NR2F2;CLU;ESR1;RPS15;RPS26;EEF1B2;PCSK1N;RPS19;PITPNM1;TMEM215;GNB2;RESP18;PNOC;ERP29;NDN;PLXNB2;RPS21;VAT1L;SSBP4
mantle zone of SePal	23/301	0.000660643	0.0221874	0	0	2.23888	16.3938	NTRK1;TESC;STXBP2;LPL;KCNA5;SERPINA9;PDYN;GPR6;ADCY5;TRAIP;INF2;ADORA2A;GNG7;PENK;PPP1R1B;PITPNM2;ITGB1BP1;DRD2;TAC1;CRYM;PTPN5;C2CD2L;SSBP4
septopallidal shell area	23/301	0.000660643	0.0221874	0	0	2.23888	16.3938	NTRK1;CHUK;TESC;LPL;KCNA5;AARSD1;SERPINA9;PDYN;GPR6;ADCY5;TRAIP;INF2;ADORA2A;GNG7;PENK;PPP1R1B;PITPNM2;ITGB1BP1;DRD2;TAC1;PTPN5;C2CD2L;SSBP4
septopallidal transition area	23/301	0.000660643	0.0221874	0	0	2.23888	16.3938	NTRK1;TESC;LPL;KCNA5;SERPINA9;PDYN;GPR6;ADCY5;TRAIP;INF2;ADORA2A;GNG7;PENK;PPP1R1B;PITPNM2;ITGB1BP1;DRD2;TAC1;CRYM;RXRG;PTPN5;C2CD2L;SSBP4
Endopiriform nucleus, dorsal part	22/301	0.00152079	0.0420237	0	0	2.13071	13.8252	NECAB2;SELPLG;EGR4;ISLR2;LPL;SERPINA9;GPR6;SREBF2;ADCY5;PPP1CA;PRPF39;GNG2;ADORA2A;KCTD10;ARHGDIA;GNG7;PENK;NMT2;DRD2;RXRG;NGEF;UBXN6
Paraventricular hypothalamic nucleus, magnocellular division	22/301	0.00152079	0.0420237	0	0	2.13071	13.8252	DDR1;GABRQ;WSB1;GPX1;ABHD8;KCNA5;SLC30A10;ESR1;SOD1;CST3;CLDN5;PCSK1N;RPS19;PITPNM1;RPL14;ERP29;SCAP;NDN;RPS2;STX3;FCGR2B;NKTR
Paraventricular hypothalamic nucleus, parvicellular division, medial parvicellular part, dorsal zone	22/301	0.00152079	0.0420237	0	0	2.13071	13.8252	DDR1;GABRQ;IGSF8;FIS1;WSB1;NDUFA2;LAPTM5;KCNA5;ESR1;USE1;TIAL1;CST3;CLDN5;PCSK1N;GAP43;PITPNM1;RPS3;ERP29;RPS2;TKT;VAT1L;NKTR
Substantia innominata	22/301	0.00152079	0.0420237	0	0	2.13071	13.8252	NTRK1;KCNJ4;FIS1;SELPLG;EGLN2;SLC32A1;TESC;KCNA5;SERPINA9;PDYN;GPR6;TMEM164;ADCY5;BCR;INF2;TMEM65;ADORA2A;ASNA1;ITGB1BP1;DRD2;GABRD;C1QC
anterior pretectal nucleus, dorsal superficial part	22/301	0.00152079	0.0420237	0	0	2.13071	13.8252	ZBTB17;SMARCD1;PLK5;CRTC1;RCC2;DCAKD;LAPTM5;SIPA1L3;CLK4;TIAL1;RPL18A;FAM110B;SREK1;MCM6;SBF1;RXRG;YPEL4;TOMM6;PPFIA2;CDH19;MAPK3;PTPN3
bed nucleus of the stria terminalis, laterocentral division	22/301	0.00152079	0.0420237	0	0	2.13071	13.8252	GPX1;TESC;KCNA5;SERPINA9;PDYN;GPR6;BAIAP2;ADCY5;PPP1CA;TRAIP;BCR;RGS4;INF2;ADORA2A;GNG7;PENK;PPP1R1B;ITGB1BP1;DRD2;GABRD;PLTP;PTPN5
medial part of MPO	22/301	0.00152079	0.0420237	0	0	2.13071	13.8252	GABRQ;RBM14;WSB1;BEX1;ABHD8;UNC5D;RPL8;ESR1;PCSK1N;RPS19;PITPNM1;TMEM215;GNB2;RPL14;ERP29;SCAP;CD38;NDN;PLXNB2;RPS2;MAP3K11;SSBP4
nucleus of the stria terminalis, medial division, anterior part	22/301	0.00152079	0.0420237	0	0	2.13071	13.8252	GABRQ;NTRK1;WSB1;SLC32A1;SPHK2;FOS;PDYN;GPR6;TRHDE;ADCY5;TIAL1;EEF1B2;ADORA2A;PENK;PNOC;RPS2;TAC1;JUNB;RPS21;SF3B1;SSBP4;ITM2C
paraseptal subpallium	22/301	0.00152079	0.0420237	0	0	2.13071	13.8252	NTRK1;TESC;LPL;KCNA5;SERPINA9;PDYN;GPR6;ADCY5;TRAIP;INF2;ADORA2A;GNG7;PENK;PPP1R1B;PITPNM2;ITGB1BP1;DRD2;TAC1;CRYM;PTPN5;C2CD2L;SSBP4
periventricular stratum of Pal	22/301	0.00152079	0.0420237	0	0	2.13071	13.8252	GPX1;TESC;KCNA5;SERPINA9;PDYN;GPR6;BAIAP2;ADCY5;PPP1CA;TRAIP;BCR;RGS4;INF2;ADORA2A;GNG7;PENK;PPP1R1B;ITGB1BP1;DRD2;GABRD;PLTP;PTPN5
plexiform layer of TuStr	22/301	0.00152079	0.0420237	0	0	2.13071	13.8252	NECAB2;KCNJ4;EGR4;KCNA5;ABCB9;SERPINA9;YBX1;FBXL16;ECSIT;GPR6;LIME1;ADCY5;BCR;ADORA2A;GNG7;PENK;TNRC18;ROMO1;GNB5;DRD2;TAC1;NGEF
reuniens nucleus, main part	22/301	0.00152079	0.0420237	0	0	2.13071	13.8252	MRPS28;CAMK2D;EGR4;KCNC2;NRXN1;GABRA3;PPP1R16A;STMN2;LAPTM5;ATP11B;ACSL3;PLCXD2;GAP43;GRM4;GNG2;BLOC1S1;LRRTM1;FAM20C;TLN2;FCGR2B;AVPI1;PTPN3
second (ventral) preoptic domain	22/301	0.00152079	0.0420237	0	0	2.13071	13.8252	GABRQ;NTRK1;WSB1;UNC5D;NR2F2;ESR1;RPS15;RPS26;EEF1B2;PCSK1N;RPS19;PITPNM1;TMEM215;GNB2;RESP18;PNOC;ERP29;NDN;PLXNB2;RPS21;VAT1L;SSBP4
ventral pallidum	22/301	0.00152079	0.0420237	0	0	2.13071	13.8252	MBD3;NTRK1;SELPLG;EGLN2;SLC32A1;TESC;KCNA5;SERPINA9;SEMA3F;PDYN;GPR6;TMEM164;ADCY5;BCR;INF2;ADORA2A;FAM110B;PPP1R1B;ITGB1BP1;DRD2;GABRD;C1QC
Field CA3	23/336	0.00279156	0.0744977	0	0	1.98486	11.6733	IPO13;OSBPL6;CLSTN2;RGS14;LRRN2;DCAKD;LAPTM5;ISLR2;LPL;ARPC4;SIPA1L3;TRHDE;GLS;MRPL11;TRAIP;NR4A3;FRZB;NEK1;ASPHD2;PABPC1;SRSF6;PPIB;PPFIA2
Bed nuclei of the stria terminalis, anterior division, dorsomedial nucleus	21/301	0.00334437	0.0744977	0	0	2.02362	11.5356	GABRQ;CADPS2;CAMK2D;WSB1;GPX1;SLC32A1;PCDHGC3;UNC5D;ESR1;TIAL1;EEF1B2;CLK1;GAP43;TMEM215;PNOC;RPL14;ERP29;NDN;RPS21;PFDN5;AAMP
Bed nuclei of the stria terminalis, posterior division, transverse nucleus	21/301	0.00334437	0.0744977	0	0	2.02362	11.5356	GABRQ;CADPS2;CAMK2D;SLC32A1;NR2F1;RPL13A;PDYN;ESR1;RPS15;EEF1B2;PCSK1N;TMEM215;RESP18;PNOC;ZMYM6;ERP29;NDN;RPS21;PFDN5;AAMP;VAT1L
Dopaminergic A13 group	21/301	0.00334437	0.0744977	0	0	2.02362	11.5356	GABRQ;WSB1;SLC32A1;RPS8;ATPIF1;RPL13A;RPL8;ADRA2A;SOD1;RPS26;PCSK1N;GAP43;DPYSL2;CLPP;PNOC;RPL14;ERP29;NDN;TLN2;TKT;PFDN5
Endopiriform nucleus	21/301	0.00334437	0.0744977	0	0	2.02362	11.5356	NECAB2;SELPLG;EGR4;ISLR2;LPL;SERPINA9;GPR6;ADCY5;PPP1CA;PRPF39;GNG2;ADORA2A;KCTD10;FRZB;ARHGDIA;NMT2;DLGAP3;DRD2;RXRG;NGEF;PSPH
Field CA3, stratum pyramidale	21/301	0.00334437	0.0744977	0	0	2.02362	11.5356	IPO13;CLSTN2;LRRN2;LAPTM5;ISLR2;LPL;ARPC4;AGAP3;SIPA1L3;TRHDE;GLS;MRPL11;TRAIP;NR4A3;FRZB;NEK1;ASPHD2;PABPC1;SRSF6;PPIB;PPFIA2
Olfactory tubercle, polymorph layer	21/301	0.00334437	0.0744977	0	0	2.02362	11.5356	TESC;KCNA5;AARSD1;SERPINA9;YBX1;PDYN;ECSIT;GPR6;ADCY5;BCR;INF2;ADORA2A;GNB2;GNG7;PENK;PITPNM2;PKIG;DRD2;TAC1;GABRD;NGEF
Paraventricular hypothalamic nucleus, parvicellular division	21/301	0.00334437	0.0744977	0	0	2.02362	11.5356	DDR1;GABRQ;FIS1;WSB1;RPS8;LAPTM5;SLC2A1;KCNA5;UNC5D;PGD;ESR1;TIAL1;CLDN5;PCSK1N;GAP43;PITPNM1;RPS3;ERP29;RPS2;AAMP;NKTR
dorsal lateral geniculate nucleus	21/301	0.00334437	0.0744977	0	0	2.02362	11.5356	PLK5;CLSTN2;LRRN2;KCNC2;CRTC1;DCAKD;LPL;FMN1;SIPA1L3;TRHDE;NR4A3;VPS72;FAM163A;FAM110B;NEK1;TLN2;PABPC1;P4HTM;AVPI1;PPFIA2;PTPN3
dorsal septopreoptic nucleus	21/301	0.00334437	0.0744977	0	0	2.02362	11.5356	GABRQ;NTRK1;FIS1;WSB1;SLC32A1;ABHD8;UNC5D;PGD;ESR1;TIAL1;GAP43;PITPNM1;CROCC;PNOC;DNER;ERP29;NDN;APOE;RPS21;AAMP;SSBP4
hilus of the DG	21/301	0.00334437	0.0744977	0	0	2.02362	11.5356	IPO13;CLSTN2;LRRN2;RPLP0;ISLR2;LPL;SIPA1L3;NCOR2;NR4A3;GNG2;PITPNM2;PDCD4;ASPHD2;PABPC1;FAU;SREK1;SRSF6;PPIB;RPS10;PPFIA2;MAPK3
mantle zone of CA	21/301	0.00334437	0.0744977	0	0	2.02362	11.5356	IPO13;RAB5C;OSBPL6;CLSTN2;RGS14;LRRN2;SLC35C2;LAPTM5;ISLR2;LPL;SIPA1L3;MRPL11;TRAIP;MRPL53;GNG10;GRIN2A;NR4A3;FRZB;ASPHD2;RXRG;PPFIA2
mantle zone of PPaA	21/301	0.00334437	0.0744977	0	0	2.02362	11.5356	GABRQ;WSB1;RNASEK;GPX1;SLC32A1;KCNA5;ESR1;ADRA2A;RPS15;EEF1B2;TPPP3;PCSK1N;RESP18;PNOC;RPS3;ERP29;NDN;TMBIM6;RPS21;AAMP;VAT1L
paraventricular nucleus, rostral part	21/301	0.00334437	0.0744977	0	0	2.02362	11.5356	GABRQ;IGSF8;RBM14;WSB1;LAPTM5;ABHD8;KCNA5;ESR1;ADRA2A;SOD1;TIAL1;CST3;PCSK1N;GAP43;PITPNM1;GUF1;ERP29;RPS2;FCGR2B;VAT1L;NKTR
peduncular paraventricular area of PHyA	21/301	0.00334437	0.0744977	0	0	2.02362	11.5356	GABRQ;WSB1;RNASEK;GPX1;SLC32A1;KCNA5;ESR1;ADRA2A;RPS15;EEF1B2;TPPP3;PCSK1N;RESP18;PNOC;RPS3;ERP29;NDN;TMBIM6;RPS21;AAMP;VAT1L
superficial stratum of ITTh	21/301	0.00334437	0.0744977	0	0	2.02362	11.5356	MRPS28;PLK5;LRRN2;KCNC2;CRTC1;RCC2;DCAKD;SIPA1L3;CLK4;TIAL1;RPL18A;LRRTM1;FAM110B;FAM20C;SREK1;MCM6;GABRD;YPEL4;AVPI1;PPFIA2;PTPN3
superficial stratum of PcPL	21/301	0.00334437	0.0744977	0	0	2.02362	11.5356	ZBTB17;SMARCD1;PLK5;CRTC1;RCC2;DCAKD;LAPTM5;SIPA1L3;CLK4;TIAL1;RPL18A;FAM110B;SREK1;MCM6;SBF1;YPEL4;TOMM6;PPFIA2;CDH19;MAPK3;PTPN3
terminal nucleus of the stria medullaris	21/301	0.00334437	0.0744977	0	0	2.02362	11.5356	GABRQ;RBM14;WSB1;GPX1;SLC32A1;PCDHGC3;KCNA5;UNC5D;RPL8;SEZ6L;ESR1;EEF1B2;PCSK1N;RESP18;PNOC;ERP29;NDN;RPS21;AAMP;MAP3K11;SSBP4
upper basal perifornical nucleus	21/301	0.00334437	0.0744977	0	0	2.02362	11.5356	NPDC1;GABRQ;WSB1;RASGRF2;APLP1;PCDHGC3;NME3;ADRA2A;RPS15;RPS26;PCSK1N;PITPNM1;ARHGDIA;DNER;RPL14;ERP29;NDN;PFDN5;AAMP;VAT1L;SSBP4
Field CA3, stratum radiatum	23/342	0.00347492	0.0766237	0	0	1.94691	11.0238	IPO13;OSBPL6;CLSTN2;RGS14;LRRN2;DCAKD;LAPTM5;ISLR2;LPL;SIPA1L3;TRHDE;GLS;MRPL11;TRAIP;PPP1R9B;GRIN2A;NR4A3;FRZB;NEK1;ASPHD2;SRSF6;PPIB;PPFIA2
Claustrum	25/386	0.00388086	0.0847191	0	0	1.87119	10.3883	GTF3C1;NECAB2;SELPLG;LPL;SERPINA9;PIK3R1;ADCY5;GNG2;VPS72;SMPD1;PENK;CHMP1A;CWC22;DLGAP3;DRD2;UBXN6;MBD3;NDUFC2;ISLR2;GPR6;SREBF2;PPP1CA;PRPF39;ADORA2A;KCTD10
mantle zone of DG	35/599	0.00394356	0.0852355	0	0	1.68282	9.31552	IPO13;CLSTN2;CRTC1;RPLP0;SERPINA9;SIPA1L3;TMEM164;ADCY5;GRIN2A;GNG10;TMEM65;MGAT1;DRD2;RPS10;PPFIA2;MAPK3;NTRK1;GPX1;SLC32A1;ISLR2;NR2F2;PDYN;GPR6;BCR;NCOR2;INF2;NR4A3;ADORA2A;PITPNM2;ASPHD2;SREK1;MCM6;PABPC1;FAU;PLEC
Dorsal part of the lateral geniculate complex	20/301	0.00701628	0.125545	0	0	1.91757	9.51022	PLK5;CLSTN2;LRRN2;KCNC2;CRTC1;DCAKD;LPL;FMN1;SIPA1L3;TRHDE;NR4A3;VPS72;FAM163A;FAM110B;NEK1;TLN2;PABPC1;P4HTM;AVPI1;PTPN3
Geniculate group, dorsal thalamus	20/301	0.00701628	0.125545	0	0	1.91757	9.51022	MRPS28;PLK5;EGR4;LRRN2;KCNC2;DCAKD;FMN1;SIPA1L3;NR4A3;RPL18A;VPS72;LRRTM1;FAM110B;FAM20C;NEK1;PABPC1;GABRD;AVPI1;TOMM6;PTPN3
Medial septal nucleus	20/301	0.00701628	0.125545	0	0	1.91757	9.51022	NTRK1;SREBF1;GABRA1;WSB1;SLC32A1;PPP1R16A;TMC7;ATP11B;UNC5D;ETFB;TRHDE;SLC8A1;EEF1B2;TMEM65;ADORA2A;PENK;PNOC;DNER;GUF1;SSBP4
Paraventricular hypothalamic nucleus, magnocellular division, posterior magnocellular part	20/301	0.00701628	0.125545	0	0	1.91757	9.51022	GABRQ;WSB1;LAPTM5;ABHD8;KCNA5;SLC30A10;ESR1;SOD1;CST3;CLDN5;PCSK1N;RPS19;PITPNM1;RPL14;ERP29;SCAP;NDN;RPS2;STX3;NKTR
Paraventricular hypothalamic nucleus, magnocellular division, posterior magnocellular part, lateral zone	20/301	0.00701628	0.125545	0	0	1.91757	9.51022	GABRQ;WSB1;LAPTM5;ABHD8;KCNA5;SLC30A10;ESR1;SOD1;CST3;CLDN5;PCSK1N;RPS19;PITPNM1;RPL14;ERP29;SCAP;NDN;RPS2;STX3;NKTR
Paraventricular hypothalamic nucleus, parvicellular division, anterior parvicellular part	20/301	0.00701628	0.125545	0	0	1.91757	9.51022	DDR1;GABRQ;WSB1;SLC2A1;KCNA5;UNC5D;PGD;ESR1;RPS26;CLDN5;PCSK1N;GAP43;PITPNM1;TMEM215;CROCC;RPS3;ERP29;APOE;AAMP;NKTR
Posterior amygdalar nucleus	20/301	0.00701628	0.125545	0	0	1.91757	9.51022	IPO13;TTC14;EGLN2;LRRN2;ATPIF1;APLP1;NR2F1;LPL;UNC5D;LIME1;ESR1;TRAIP;DMWD;GNB2;DNER;PDCD4;PKIG;RXRG;TOMM6;MAPK3
caudal secondary prosencephalon	20/301	0.00701628	0.125545	0	0	1.91757	9.51022	KCNJ4;EGR2;ARPP21;LPL;SERPINA9;GPR6;CLU;TMEM198;ADCY5;PPP1CA;BCR;GRIN2A;PRPF39;ADORA2A;FRZB;PITPNM2;MAP3K10;DLGAP3;DRD2;NGEF
core of T-DMH	20/301	0.00701628	0.125545	0	0	1.91757	9.51022	NPDC1;GABRQ;RBM14;PCDHGC3;KCNA5;AARSD1;ESR1;SOD1;CST3;DPM3;PCSK1N;ALDH2;GNB2;POLD2;NDN;PLXNB2;APOE;RPS2;SLIT2;VIM
dorsal part of PcP	20/301	0.00701628	0.125545	0	0	1.91757	9.51022	ZBTB17;SMARCD1;PLK5;CRTC1;RCC2;DCAKD;SLC38A10;SIPA1L3;RPS26;SLC25A27;EML5;GNG10;RPL18A;FAU;MCM6;CCNL1;RPS10;YPEL4;PPFIA2;MAPK3
intermediate stratum of PHyB-D	20/301	0.00701628	0.125545	0	0	1.91757	9.51022	GABRQ;WSB1;RASGRF2;APLP1;NME3;ESR1;ADRA2A;RPS15;RPS26;TMEM145;PCSK1N;PITPNM1;ARHGDIA;DNER;ERP29;NDN;TMBIM6;PFDN5;AAMP;VAT1L
intermediate stratum of PalSe	20/301	0.00701628	0.125545	0	0	1.91757	9.51022	NTRK1;CAMK2D;SLC32A1;PPP1R16A;TMC7;SERPINA9;FOS;PDYN;GPR6;TRHDE;SLC8A1;ADCY5;TIAL1;ADORA2A;PENK;PNOC;GUF1;DRD2;SSBP4;ITM2C
interstitial nucleus of the posterior limb of the anterior commissure	20/301	0.00701628	0.125545	0	0	1.91757	9.51022	EPHA5;NECAB2;CAMK2D;LPL;SERPINA9;FBXL16;PDYN;SLC30A10;GPR6;LIME1;ADCY5;TRAIP;BCR;EFNB1;INF2;ADORA2A;CDC37;PENK;DRD2;TAC1
lambdoid septal zone	20/301	0.00701628	0.125545	0	0	1.91757	9.51022	NTRK1;WSB1;PLK5;SLC32A1;SPHK2;TMC7;ATP11B;ETFB;PDYN;TRHDE;ADCY5;TMEM65;ADORA2A;SLC25A19;PENK;PNOC;DNER;GUF1;TAC1;SSBP4
mantle zone of PcPD	20/301	0.00701628	0.125545	0	0	1.91757	9.51022	ZBTB17;SMARCD1;PLK5;CRTC1;RCC2;DCAKD;SLC38A10;SIPA1L3;RPS26;SLC25A27;EML5;GNG10;RPL18A;FAU;MCM6;CCNL1;RPS10;YPEL4;PPFIA2;MAPK3
medial pallium (hippocampal allocortex)	20/301	0.00701628	0.125545	0	0	1.91757	9.51022	IPO13;CLSTN2;RGS14;TMEM200A;LRRN2;LAPTM5;ISLR2;LPL;SIPA1L3;MRPL11;TRAIP;GNG10;GRIN2A;NR4A3;FRZB;ASPHD2;MCM6;RPS10;RAMP1;PPFIA2
paraventricular nucleus, dorsal part	20/301	0.00701628	0.125545	0	0	1.91757	9.51022	DDR1;GABRQ;FIS1;RBM14;WSB1;SLC2A1;KCNA5;UNC5D;PGD;CLU;ESR1;CLDN5;PCSK1N;GAP43;PITPNM1;RPS3;ERP29;RPS2;SSBP4;NKTR
posterobasal nucleus, intermediate part	20/301	0.00701628	0.125545	0	0	1.91757	9.51022	GABRQ;WSB1;RASGRF2;APLP1;PDYN;ESR1;ADRA2A;RPS15;RPS26;TMEM145;PCSK1N;PITPNM1;DNER;ERP29;NDN;TMBIM6;LGALS8;PFDN5;AAMP;VAT1L
striohypothalamic nucleus	20/301	0.00701628	0.125545	0	0	1.91757	9.51022	GABRQ;CADPS2;WSB1;SLC32A1;PCDHGC3;RPL13A;CLU;ESR1;RPS15;RPS26;EEF1B2;PCSK1N;TMEM215;PNOC;ERP29;NDN;RPS21;PFDN5;AAMP;SSBP4
superficial dorsofrontal area	20/301	0.00701628	0.125545	0	0	1.91757	9.51022	GTF3C1;PLK5;CRTC1;RCC2;SLC38A10;ARPC4;SIPA1L3;GNL1;NOL6;RPS26;SLC25A27;EML5;GNG10;RPL18A;FAU;CCNL1;RPS10;YPEL4;PPFIA2;MAPK3
superficial stratum of PCPD	20/301	0.00701628	0.125545	0	0	1.91757	9.51022	GTF3C1;PLK5;CRTC1;RCC2;SLC38A10;ARPC4;SIPA1L3;GNL1;NOL6;RPS26;SLC25A27;EML5;GNG10;RPL18A;FAU;CCNL1;RPS10;YPEL4;PPFIA2;MAPK3
Medial preoptic nucleus	25/410	0.00819142	0.145381	0	0	1.75232	8.41931	RPS15;EEF1B2;PCSK1N;RPS19;RESP18;DNER;RPL14;NDN;GABRQ;WSB1;APLP1;UNC5D;NR2F2;ESR1;RPS26;PITPNM1;VGF;TMEM215;GNB2;PNOC;ERP29;PLXNB2;RPS21;MAP3K11;SSBP4
Suprageniculate nucleus	28/478	0.00900913	0.158604	0	0	1.68054	7.91451	CAMK2D;KCNC2;CRTC1;SEMA3F;SIPA1L3;RAP1GAP;RPL18A;VPS72;LRRTM1;FAM110B;NEK1;GABRD;PPFIA2;MRPS28;VPS18;PLK5;EGR4;LRRN2;DCAKD;THOC1;FAM20C;SREK1;MCM6;PABPC1;PTPN3;AVPI1;TOMM6;CDH19
Anterodorsal preoptic nucleus	19/301	0.0140225	0.188958	0	0	1.81256	7.73437	GABRQ;WSB1;SLC32A1;ABHD8;UNC5D;ESR1;TIAL1;RPS26;EEF1B2;GAP43;PITPNM1;CROCC;PENK;PNOC;DNER;ERP29;NDN;AAMP;SSBP4
Bed nuclei of the stria terminalis, anterior division, rhomboid nucleus	19/301	0.0140225	0.188958	0	0	1.81256	7.73437	GTF3C1;SLC32A1;SERPINA9;PDYN;GPR6;BAIAP2;ADCY5;GRHPR;INF2;ADORA2A;PNOC;ZMYM6;ITGB1BP1;RPS2;CCNL1;MFGE8;DRD2;GABRD;RXRG
Bed nuclei of the stria terminalis, anterior division, ventral nucleus	19/301	0.0140225	0.188958	0	0	1.81256	7.73437	GABRQ;CADPS2;WSB1;SLC32A1;PCDHGC3;NPY1R;RPL13A;ESR1;RPS15;RPS26;EEF1B2;PCSK1N;RESP18;PNOC;ERP29;NDN;RPS21;AAMP;SSBP4
Central amygdalar nucleus	19/301	0.0140225	0.188958	0	0	1.81256	7.73437	NECAB2;CAMK2D;SELPLG;SLC32A1;NR2F1;PDYN;ADCY5;TRAIP;TCEAL5;RPS19;ADORA2A;PENK;PNOC;MFGE8;DRD2;JUNB;C2CD2L;PSPH;TOMM6
Central amygdalar nucleus, medial part	19/301	0.0140225	0.188958	0	0	1.81256	7.73437	NECAB2;NTRK1;CAMK2D;SLC32A1;SEMA3F;PDYN;CLU;ESR1;ADCY5;EEF1B2;RPS19;ADORA2A;PENK;PNOC;DRD2;JUNB;C2CD2L;PSPH;TOMM6
Cerebrum	19/301	0.0140225	0.188958	0	0	1.81256	7.73437	KCNJ4;KCNH3;EGR2;ARPP21;LPL;SERPINA9;GPR6;TMEM198;PPP1CA;BCR;GRIN2A;PRPF39;ADORA2A;FRZB;PITPNM2;MAP3K10;DLGAP3;DRD2;NGEF
Cortical subplate	19/301	0.0140225	0.188958	0	0	1.81256	7.73437	NECAB2;SELPLG;EGLN2;NR2F1;GLT8D1;LPL;SERPINA9;FBXL16;LIME1;PRPF39;TCEAL5;GNG2;ADORA2A;ARHGDIA;CHMP1A;CWC22;DRD2;PSPH;TOMM6
Field CA3, pyramidal layer	19/301	0.0140225	0.188958	0	0	1.81256	7.73437	IPO13;CLSTN2;LRRN2;DCAKD;ISLR2;LPL;ARPC4;AGAP3;SIPA1L3;TRHDE;MRPL11;TRAIP;NR4A3;FRZB;ASPHD2;PABPC1;SRSF6;PPIB;PPFIA2
Hippocampal region	19/301	0.0140225	0.188958	0	0	1.81256	7.73437	IPO13;CLSTN2;RGS14;LRRN2;DCAKD;ISLR2;LPL;SIPA1L3;MRPL11;TRAIP;NCOR2;GNG10;GRIN2A;NR4A3;ASPHD2;PABPC1;RPS10;RAMP1;PPFIA2
Lateral septal nucleus, rostral (rostroventral) part	19/301	0.0140225	0.188958	0	0	1.81256	7.73437	SLC32A1;TMC7;SERPINA9;PDYN;GPR6;TRHDE;SLC8A1;ADCY5;TRAIP;ADORA2A;PENK;PNOC;GUF1;MFGE8;DRD2;CRYM;PTPN5;SSBP4;ITM2C
Olfactory tubercle	19/301	0.0140225	0.188958	0	0	1.81256	7.73437	KCNJ4;TESC;NPY1R;KCNA5;SERPINA9;YBX1;PDYN;GPR6;ADCY5;BCR;INF2;ADORA2A;GNG7;PENK;PITPNM2;GNB5;DRD2;TAC1;GABRD
Paraventricular hypothalamic nucleus, descending division	19/301	0.0140225	0.188958	0	0	1.81256	7.73437	GABRQ;WSB1;ATPIF1;RPL13A;CLU;ESR1;RPS26;PCSK1N;GAP43;DPYSL2;PNOC;RPL14;ERP29;NDN;TLN2;TKT;RPS21;PFDN5;AAMP
Posterior hypothalamic nucleus	19/301	0.0140225	0.188958	0	0	1.81256	7.73437	GABRQ;CREBZF;WSB1;RPS8;COL11A1;ABHD8;RPL8;CLU;TMEM145;KRTCAP2;PCSK1N;DNER;ERP29;SLC17A6;TKT;FCGR2B;PFDN5;VAT1L;NKTR
Primary somatosensory area, unassigned, layer 6b	19/301	0.0140225	0.188958	0	0	1.81256	7.73437	ALAS2;LRP1;SPHK2;NDUFC2;PIK3R1;SLC8A1;HDDC3;PPP1CA;INF2;BLOC1S1;PPME1;VPS72;FASN;PSME4;CHMP1A;PIN1;RXRG;CAMK2G;UBXN6
Primary somatosensory area, upper limb, layer 6a	19/301	0.0140225	0.188958	0	0	1.81256	7.73437	ALAS2;CLSTN2;LRP1;PIK3R1;TMEM196;GNL1;PLCXD2;PSMA7;HDDC3;PPP1CA;PSMB6;SAMM50;VPS72;SMPD1;PSME4;MYO18A;FGF12;CAMK2G;UBXN6
Primary somatosensory area, upper limb, layer 6b	19/301	0.0140225	0.188958	0	0	1.81256	7.73437	NPDC1;ALAS2;CLSTN2;LRP1;NDUFC2;PIK3R1;TMEM196;PSMA7;SLC8A1;HDDC3;PPP1CA;PSMB6;INF2;VPS72;FASN;SMPD1;PSME4;CAMK2G;UBXN6
Tegmental reticular nucleus	19/301	0.0140225	0.188958	0	0	1.81256	7.73437	CREBZF;OSBPL6;NDUFA6;IQSEC3;ESRRG;SLC4A3;FSTL1;HAPLN4;USE1;GLS;EFR3A;SNRK;NDUFS8;PDLIM2;VSNL1;DDT;FAM163A;TMCC2;NEFH
alar plate of evaginated telencephalic vesicle	19/301	0.0140225	0.188958	0	0	1.81256	7.73437	KCNJ4;EGR2;ARPP21;LPL;SERPINA9;GPR6;TMEM198;ADCY5;PPP1CA;BCR;GRIN2A;PRPF39;ADORA2A;FRZB;PITPNM2;MAP3K10;DLGAP3;DRD2;NGEF
centromedian nucleus	19/301	0.0140225	0.188958	0	0	1.81256	7.73437	MRPS28;CAMK2D;EGR4;KCNC2;NRXN1;STARD10;GABRA3;PPP1R16A;LAPTM5;GRM4;BLOC1S1;VPS72;LRRTM1;FAM20C;TLN2;STX3;FCGR2B;AVPI1;PTPN3
forebrain	19/301	0.0140225	0.188958	0	0	1.81256	7.73437	KCNJ4;ARPP21;LPL;ICAM5;SERPINA9;GPR6;TMEM198;ADCY5;PPP1CA;GRIN2A;PRPF39;ADORA2A;FRZB;PITPNM2;DLGAP3;DRD2;CRYM;GABRD;RXRG
hippocampus (cortex Ammonis)	19/301	0.0140225	0.188958	0	0	1.81256	7.73437	IPO13;RAB5C;OSBPL6;CLSTN2;RGS14;LRRN2;LAPTM5;ISLR2;LPL;SIPA1L3;MRPL11;TRAIP;MRPL53;GNG10;GRIN2A;NR4A3;FRZB;ASPHD2;PPFIA2
intermediate stratum of PSPa	19/301	0.0140225	0.188958	0	0	1.81256	7.73437	GABRQ;WSB1;NME3;RPL8;PDYN;CLU;ADRA2A;SOD1;RPS15;RPS26;PCSK1N;PITPNM1;ERP29;NDN;TMBIM6;TKT;PFDN5;AAMP;VAT1L
lateral septal nucleus, intermedio-intermediate part	19/301	0.0140225	0.188958	0	0	1.81256	7.73437	NTRK1;CAMK2D;SLC32A1;PPP1R16A;TMC7;SERPINA9;FOS;GPR6;TRHDE;SLC8A1;ADCY5;TIAL1;ADORA2A;PENK;PNOC;GUF1;DRD2;SSBP4;ITM2C
lateral septal nucleus, intermedio-ventral part	19/301	0.0140225	0.188958	0	0	1.81256	7.73437	NTRK1;WSB1;PLK5;SLC32A1;COL11A1;ABHD8;ATP11B;UNC5D;ETFB;GPR6;ADCY5;EEF1B2;PENK;PNOC;GUF1;NDN;TAC1;RPS21;SSBP4
layer 6 of PCx	19/301	0.0140225	0.188958	0	0	1.81256	7.73437	TIMM8B;CLSTN2;LRP1;NDUFC2;PIK3R1;FMN2;TMEM196;GNL1;SLC8A1;HDDC3;PPP1CA;PPME1;VPS72;PSME4;CHMP1A;STUB1;APBB1;CAMK2G;UBXN6
lower dorsal lateral hypothalamic area	19/301	0.0140225	0.188958	0	0	1.81256	7.73437	GABRQ;ALDH1L1;RPS8;NME3;RPL13A;RPL8;PDYN;ADRA2A;SOD1;RPS26;PCSK1N;DPYSL2;PNOC;ERP29;NDN;TMBIM6;TKT;PFDN5;AAMP
mantle zone of PSPa	19/301	0.0140225	0.188958	0	0	1.81256	7.73437	GABRQ;WSB1;NME3;PDYN;ADRA2A;RPS15;RPS26;TPPP3;PCSK1N;RESP18;PNOC;ERP29;NDN;TMBIM6;TKT;RPS21;PFDN5;AAMP;VAT1L
medial basal reticular formation of m1	19/301	0.0140225	0.188958	0	0	1.81256	7.73437	CREBZF;ABCA2;ALDH1L1;NDUFB5;COL11A1;CMTM5;NDUFC1;RND2;S100B;TUBB4A;SGPP2;ZFP14;MAG;DNPEP;PNOC;FGFR1OP;DRD2;QRFPR;RXRG
periventricular stratum of DTTh	19/301	0.0140225	0.188958	0	0	1.81256	7.73437	MRPS28;NTRK1;CAMK2D;EGR4;KCNC2;NRXN1;STARD10;GABRA3;PPP1R16A;LAPTM5;ACSL3;BLOC1S1;LRRTM1;FAM20C;TLN2;STX3;FCGR2B;AVPI1;PTPN3
periventricular stratum of PO1	19/301	0.0140225	0.188958	0	0	1.81256	7.73437	GABRQ;NTRK1;FIS1;WSB1;SLC32A1;UNC5D;PGD;ESR1;TIAL1;GAP43;PITPNM1;GNB2;PNOC;DNER;ERP29;NDN;RPS21;AAMP;SSBP4
periventricular stratum of p1B	19/301	0.0140225	0.188958	0	0	1.81256	7.73437	CREBZF;VPS18;LRRC24;COL11A1;STARD10;PPP1R16A;GOT2;NDUFC1;ETFB;USE1;KRTCAP2;TUBB3;PPIP5K2;PNOC;PSMB1;FAU;TKT;DRD2;FCGR2B
preoptic area	19/301	0.0140225	0.188958	0	0	1.81256	7.73437	GABRQ;NTRK1;WSB1;SLC32A1;UNC5D;NR2F2;ESR1;RPS15;EEF1B2;PCSK1N;TMEM215;RESP18;PNOC;DNER;ERP29;NDN;RPS21;VAT1L;SSBP4
r3 part of medial pontine nuclei	19/301	0.0140225	0.188958	0	0	1.81256	7.73437	RTN2;CREBZF;NDUFB9;OSBPL6;INTS1;COX4I1;STMN3;ESRRG;AARSD1;AGAP3;DNAJC15;RND2;FSTL1;GLS;EFNB1;PDLIM2;FAM163A;TMCC2;CSNK1G2
secondary prosencephalon	19/301	0.0140225	0.188958	0	0	1.81256	7.73437	KCNJ4;ARPP21;LPL;SERPINA9;GPR6;TMEM198;ADCY5;PPP1CA;BCR;GRIN2A;PRPF39;ADORA2A;FRZB;PITPNM2;MAP3K10;DLGAP3;DRD2;RXRG;NGEF
superficial stratum of CA	19/301	0.0140225	0.188958	0	0	1.81256	7.73437	IPO13;RAB5C;OSBPL6;CLSTN2;RGS14;LRRN2;LAPTM5;ISLR2;LPL;SIPA1L3;MRPL11;TRAIP;MRPL53;GNG10;GRIN2A;NR4A3;FRZB;ASPHD2;PPFIA2
superficial stratum of DgSe	19/301	0.0140225	0.188958	0	0	1.81256	7.73437	NTRK1;WSB1;PLK5;SLC32A1;PPP1R16A;TMC7;ATP11B;ETFB;ESR1;TIAL1;PITPNM1;TMEM65;ADORA2A;PENK;PNOC;DNER;NDN;TKT;SSBP4
superficial stratum of r3BM	19/301	0.0140225	0.188958	0	0	1.81256	7.73437	RTN2;CREBZF;NDUFB9;OSBPL6;INTS1;COX4I1;STMN3;ESRRG;AARSD1;AGAP3;DNAJC15;RND2;FSTL1;GLS;EFNB1;PDLIM2;FAM163A;TMCC2;CSNK1G2
vertical nucleus of the diagonal band	19/301	0.0140225	0.188958	0	0	1.81256	7.73437	NTRK1;WSB1;SLC32A1;KCNIP1;COL11A1;TMC7;ATP11B;AARSD1;ETFB;ESR1;TIAL1;KRTCAP2;DPM3;TMEM65;ADORA2A;PNOC;DNER;ERP29;SSBP4
Field CA3, stratum oriens	21/349	0.0166279	0.222692	0	0	1.72311	7.05902	IPO13;CLSTN2;LRRN2;LAPTM5;ISLR2;LPL;ARPC4;AGAP3;SIPA1L3;CLU;TRHDE;WDR54;MRPL11;TRAIP;NR4A3;BLOC1S1;FRZB;PABPC1;PPIB;PLTP;PPFIA2
Anterior hypothalamic nucleus, central part	18/301	0.0266591	0.298445	0	0	1.70859	6.19299	GABRQ;WSB1;GPX1;SLC32A1;PCDHGC3;KCNA5;ESR1;EEF1B2;PCSK1N;PNOC;ERP29;NDN;RPS21;AAMP;MAP3K11;VAT1L;SSBP4;NKTR
Bed nuclei of the stria terminalis, posterior division, strial extension	18/301	0.0266591	0.298445	0	0	1.70859	6.19299	SLC2A1;KCNA5;SERPINA9;PDYN;GPR6;ADCY5;TRAIP;INF2;ADORA2A;GNG7;APOE;VIM;CCNL1;DRD2;CRYM;PLTP;PTPN5;C2CD2L
Dentate gyrus, polymorph layer	18/301	0.0266591	0.298445	0	0	1.70859	6.19299	IPO13;PLK5;CLSTN2;LRRN2;RPLP0;SIPA1L3;NCOR2;NR4A3;GNG2;PITPNM2;ASPHD2;PABPC1;FAU;SREK1;PPIB;RPS10;PPFIA2;MAPK3
Hippocampal formation	18/301	0.0266591	0.298445	0	0	1.70859	6.19299	CLSTN2;RGS14;TMEM200A;SLC35C2;ISLR2;LPL;SIPA1L3;MRPL11;TRAIP;GNG10;GRIN2A;PRPF39;NR4A3;MCM6;RPS10;RXRG;RAMP1;PPFIA2
Intermediodorsal nucleus of the thalamus	18/301	0.0266591	0.298445	0	0	1.70859	6.19299	MRPS28;CAMK2D;LRRN2;KCNC2;NRXN1;GABRA3;PPP1R16A;ACSL3;GRM4;BLOC1S1;LRRTM1;ZMYM6;FAM20C;TLN2;SCAND1;FCGR2B;AVPI1;PTPN3
Orbital area, lateral part, layer 5	18/301	0.0266591	0.298445	0	0	1.70859	6.19299	LRRC24;EGR4;LRP1;SLC35C2;WWC1;CCDC124;NDUFC2;PIK3R1;TMEM196;SREBF2;PSMA7;PSMB6;INF2;PPME1;SMPD1;ASPHD2;UBQLN4;UBXN6
Pallidum, ventral region	18/301	0.0266591	0.298445	0	0	1.70859	6.19299	NTRK1;FIS1;EGLN2;SLC32A1;KCNA5;NR2F2;SERPINA9;PDYN;GPR6;ADCY5;BCR;INF2;TMEM65;ADORA2A;ASNA1;DRD2;GABRD;C1QC
Parastrial nucleus	18/301	0.0266591	0.298445	0	0	1.70859	6.19299	GABRQ;WSB1;SLC32A1;PCDHGC3;NME3;ESR1;TIAL1;RPS15;GAP43;TMEM215;PNOC;ERP29;NDN;RPS21;AAMP;VAT1L;SSBP4;C1QC
Primary somatosensory area, trunk, layer 6b	18/301	0.0266591	0.298445	0	0	1.70859	6.19299	RAB5C;CLSTN2;LRP1;NDUFC2;PIK3R1;FMN2;TMEM196;GNL1;SLC8A1;HDDC3;MAPK8IP1;PPP1CA;INF2;ZMIZ2;FASN;PSME4;CAMK2G;UBXN6
Striatum-like amygdalar nuclei	18/301	0.0266591	0.298445	0	0	1.70859	6.19299	NECAB2;CAMK2D;EGLN2;NR2F1;UNC5D;PDYN;LIME1;ESR1;ADCY5;RPS19;ADORA2A;TMEM215;PENK;PNOC;CD38;DRD2;C2CD2L;TOMM6
Superior colliculus, motor related, deep gray layer	18/301	0.0266591	0.298445	0	0	1.70859	6.19299	ALDH1L1;PLK5;RPS8;COL11A1;RASGRF2;NR2F2;SEMA3F;RND2;KCNAB3;CLU;PLCXD2;DISP2;ZMIZ2;VAMP1;SLC17A6;NDN;RXRG;RAMP1
dorsomedial preoptic area, intermediate part	18/301	0.0266591	0.298445	0	0	1.70859	6.19299	GABRQ;WSB1;SLC32A1;NME3;SLC38A10;ESR1;RPS15;GAP43;TMEM215;PNOC;DNER;ERP29;NDN;RPS21;AAMP;MAP3K11;VAT1L;SSBP4
intermediate stratum of DgSe	18/301	0.0266591	0.298445	0	0	1.70859	6.19299	NTRK1;WSB1;PLK5;SLC32A1;COL11A1;ATP11B;UNC5D;ETFB;GPR6;ADCY5;EEF1B2;PENK;PNOC;GUF1;NDN;TAC1;RPS21;SSBP4
intermediate stratum of LPrP	18/301	0.0266591	0.298445	0	0	1.70859	6.19299	NECAB2;MBD3;SELPLG;ISLR2;LPL;NDUFC2;PIK3R1;SERPINA9;GPR6;SREBF2;PPP1CA;PRPF39;GNG2;ADORA2A;KCTD10;CHMP1A;CWC22;DLGAP3
intermediate stratum of PHyB-V	18/301	0.0266591	0.298445	0	0	1.70859	6.19299	GABRQ;RBM14;RAB5C;RPS8;NME2;ABHD8;CLU;ADRA2A;TMEM145;KRTCAP2;PCSK1N;PITPNM1;KCTD10;ERP29;VIM;FCGR2B;VAT1L;NKTR
intermediate stratum of PO1	18/301	0.0266591	0.298445	0	0	1.70859	6.19299	GABRQ;NTRK1;WSB1;SLC32A1;NME3;ATP11B;NR2F2;ESR1;RPS15;RESP18;PNOC;ERP29;NDN;MGAT1;RPS21;AAMP;VAT1L;SSBP4
intermedioposterior nucleus	18/301	0.0266591	0.298445	0	0	1.70859	6.19299	SMARCD1;PLK5;KCNC2;CRTC1;RCC2;DCAKD;PCDHGC3;PARK7;SIPA1L3;TIAL1;LRRTM1;FAM110B;CCNL1;SBF1;YPEL4;AVPI1;PPFIA2;PTPN3
layer 4 of OCx	18/301	0.0266591	0.298445	0	0	1.70859	6.19299	DPP10;TIMM8B;EGR2;ARPP21;NPY1R;FOS;SYN1;HDDC3;RGS4;NR4A3;SMPD1;PITPNM2;TNRC18;STUB1;APBB1;PTPN5;TPT1;CDH19
mantle zone of AHy	18/301	0.0266591	0.298445	0	0	1.70859	6.19299	NECAB2;CAMK2D;EGLN2;NR2F1;NME3;UNC5D;LIME1;CLU;ESR1;ADCY5;RPS19;TMEM215;PNOC;DNER;RXRG;MET;C2CD2L;TOMM6
molecular layer of the DG	18/301	0.0266591	0.298445	0	0	1.70859	6.19299	IPO13;CLSTN2;CRTC1;DCAKD;ISLR2;SIPA1L3;NCOR2;GNG10;GRIN2A;NR4A3;PITPNM2;ASPHD2;PABPC1;SREK1;MCM6;RPS10;PPFIA2;MAPK3
parastrial preoptic nucleus	18/301	0.0266591	0.298445	0	0	1.70859	6.19299	GABRQ;CAMK2D;WSB1;GPX1;SLC32A1;UNC5D;ESR1;RPS15;EEF1B2;CLK1;GAP43;TMEM215;CLPP;PNOC;NDN;RPS21;AAMP;VAT1L
peduncular part of dorsomedial hypothalamic nucleus	18/301	0.0266591	0.298445	0	0	1.70859	6.19299	GABRQ;RBM14;WSB1;RPS8;ABHD8;ESR1;ADRA2A;CST3;DUSP11;TMEM145;PCSK1N;RPS19;PITPNM1;GNB2;ERP29;VIM;PFDN5;NKTR
peduncular subparaventricular area	18/301	0.0266591	0.298445	0	0	1.70859	6.19299	GABRQ;WSB1;NME3;PDYN;ADRA2A;RPS15;RPS26;TPPP3;PCSK1N;RESP18;ERP29;NDN;TMBIM6;TKT;RPS21;PFDN5;AAMP;VAT1L
periventricular stratum of SeDg	18/301	0.0266591	0.298445	0	0	1.70859	6.19299	GABRQ;WSB1;SLC32A1;PDYN;GPR6;TRHDE;ADCY5;TIAL1;EEF1B2;PENK;PNOC;RPS2;TAC1;JUNB;RPS21;SF3B1;SSBP4;ITM2C
r3 part of reticulotegmental nucleus, shell portion	18/301	0.0266591	0.298445	0	0	1.70859	6.19299	RTN2;CREBZF;NDUFA6;SLC35C2;COX4I1;ABHD8;ESRRG;SLC4A3;RND2;FSTL1;HAPLN4;GLS;EFR3A;VSNL1;DDT;FAM163A;TMCC2;NEFH
shell of P-DMH	18/301	0.0266591	0.298445	0	0	1.70859	6.19299	GABRQ;RBM14;WSB1;RPS8;ABHD8;CLU;ESR1;ADRA2A;CST3;DUSP11;TMEM145;PCSK1N;RPS19;PITPNM1;GNB2;ERP29;PFDN5;NKTR
sublayer 6b of PCx	18/301	0.0266591	0.298445	0	0	1.70859	6.19299	CLSTN2;LRP1;TMEM200A;SLC35C2;NDUFC2;PIK3R1;GNL1;SLC8A1;HDDC3;MAPK8IP1;PPP1CA;INF2;ZMIZ2;PSME4;AP2S1;RXRG;CAMK2G;UBXN6
substantia innominata/basal nucleus	18/301	0.0266591	0.298445	0	0	1.70859	6.19299	NTRK1;CAMK2D;EGLN2;SLC32A1;ATP11B;PDYN;DNAJC15;ESR1;RPS15;RPS19;TMEM65;ADORA2A;ASNA1;DNER;DRD2;AAMP;TOMM6;PLEC
superficial stratum of DTTh	18/301	0.0266591	0.298445	0	0	1.70859	6.19299	PLK5;CLSTN2;LRRN2;KCNC2;CRTC1;DCAKD;LPL;FMN1;ACSL3;SIPA1L3;TRHDE;WDR54;NR4A3;FAM110B;NEK1;AVPI1;PPFIA2;PTPN3
superficial stratum of JcPL	18/301	0.0266591	0.298445	0	0	1.70859	6.19299	VPS18;ZBTB17;PLK5;KCNC2;DCAKD;THOC1;SEMA3F;SIPA1L3;VTN;SAMM50;RPL18A;GJB6;LCN2;RPL37;MCM6;TOMM6;CDH19;PTPN3
telencephalic vesicle	18/301	0.0266591	0.298445	0	0	1.70859	6.19299	KCNJ4;EGR2;ARPP21;LPL;SERPINA9;GPR6;TMEM198;ADCY5;PPP1CA;BCR;GRIN2A;PRPF39;ADORA2A;FRZB;PITPNM2;DLGAP3;DRD2;NGEF
upper dorsal perifornical nucleus	18/301	0.0266591	0.298445	0	0	1.70859	6.19299	GABRQ;WSB1;GPX1;ESR1;RPS15;RPS26;EEF1B2;PCSK1N;DPYSL2;RESP18;PNOC;ERP29;NDN;TMBIM6;RPS21;AAMP;VAT1L;SSBP4
Rhomboid nucleus	20/345	0.0270836	0.301651	0	0	1.65412	5.96943	MRPS28;CAMK2D;EGR4;KCNC2;NRXN1;STXBP2;STARD10;GABRA3;PPP1R16A;LAPTM5;ACSL3;GRM4;BLOC1S1;LRRTM1;FAM20C;TLN2;STX3;FCGR2B;AVPI1;PTPN3
Dentate gyrus	18/320	0.0443724	0.430725	0	0	1.59949	4.98264	IPO13;CLSTN2;CRTC1;ISLR2;SIPA1L3;NCOR2;GNG10;GRIN2A;NR4A3;PITPNM2;ASPHD2;PABPC1;FAU;SREK1;MCM6;RPS10;PPFIA2;MAPK3
Field CA1, stratum radiatum	19/345	0.0473051	0.430725	0	0	1.56429	4.77287	EGLN2;RAB5C;OSBPL6;RGS14;TMEM200A;LPL;SIPA1L3;SLC8A1;MRPL11;TRAIP;MRPL53;GNG10;GRIN2A;PRPF39;NR4A3;NDST3;ASPHD2;SF3B1;RAMP1
Dorsomedial nucleus of the hypothalamus, posterior part	17/301	0.0481434	0.430725	0	0	1.60563	4.87079	GABRQ;WSB1;PCDHGC3;ABHD8;ESR1;ADRA2A;CST3;DUSP11;KRTCAP2;PCSK1N;RPS19;PITPNM1;GNB2;ERP29;VIM;PFDN5;AAMP
Gustatory areas, layer 6b	17/301	0.0481434	0.430725	0	0	1.60563	4.87079	NECAB2;GTF3C1;LPL;NDUFC2;ACTN4;SERPINA9;SREBF2;PPP1CA;PPP1R9B;GNG2;KCTD10;CHMP1A;CWC22;STUB1;DRD2;UBXN6;GIT1
Islands of Calleja	17/301	0.0481434	0.430725	0	0	1.60563	4.87079	NTRK1;LAMB2;TESC;NPY1R;KCNA5;SERPINA9;PDYN;GPR6;ADCY5;BCR;INF2;ADORA2A;GNG7;PENK;PITPNM2;DRD2;TAC1
JcP contribution to LTL	17/301	0.0481434	0.430725	0	0	1.60563	4.87079	VPS18;PLK5;KCNC2;DCAKD;THOC1;SEMA3F;SIPA1L3;VTN;SAMM50;RPL18A;GJB6;LCN2;RPL37;MCM6;TOMM6;CDH19;PTPN3
Lateral septal nucleus	17/301	0.0481434	0.430725	0	0	1.60563	4.87079	NECAB2;SLC32A1;PDYN;GPR6;TRHDE;SLC8A1;ADCY5;TRAIP;ADORA2A;FRZB;PENK;PNOC;GUF1;MFGE8;DRD2;CRYM;PLTP
Medial amygdalar nucleus, anterodorsal part	17/301	0.0481434	0.430725	0	0	1.60563	4.87079	NECAB2;CAMK2D;EGLN2;NR2F1;NME3;KCNJ16;UNC5D;LIME1;ESR1;DPM3;RPS19;TMEM215;PENK;DNER;CD38;MET;TOMM6
Medial amygdalar nucleus, posterodorsal part, sublayer b	17/301	0.0481434	0.430725	0	0	1.60563	4.87079	NECAB2;EGLN2;NR2F1;NME3;LPL;UNC5D;LIME1;ESR1;PRRC2A;TMEM215;PNOC;DNER;PDCD4;MFGE8;MET;AAMP;C2CD2L
Nucleus of Darkschewitsch	17/301	0.0481434	0.430725	0	0	1.60563	4.87079	CREBZF;VPS18;LRRC24;COL11A1;TNK2;STARD10;PPP1R16A;GOT2;USE1;KRTCAP2;PPIP5K2;PNOC;PSMB1;VAMP1;TKT;DRD2;FCGR2B
Olfactory tubercle, pyramidal layer	17/301	0.0481434	0.430725	0	0	1.60563	4.87079	TESC;KCNA5;SERPINA9;YBX1;PDYN;GPR6;ADCY5;BCR;INF2;ADORA2A;GNG7;PENK;PITPNM2;GNB5;DRD2;TAC1;RXRG
Orbital area, ventrolateral part, layer 5	17/301	0.0481434	0.430725	0	0	1.60563	4.87079	FIS1;EGR4;LRP1;WWC1;CCDC124;NDUFC2;PIK3R1;TMEM196;SREBF2;PSMB6;PPME1;SMPD1;NHP2;MAP3K10;FGF12;UBQLN4;UBXN6
Paraventricular hypothalamic nucleus, descending division, lateral parvicellular part	17/301	0.0481434	0.430725	0	0	1.60563	4.87079	GABRQ;WSB1;ATPIF1;RPL13A;ESR1;RPS26;PCSK1N;GAP43;DPYSL2;RPL14;ERP29;NDN;TLN2;TKT;RPS21;PFDN5;AAMP
Primary motor area, Layer 6b	17/301	0.0481434	0.430725	0	0	1.60563	4.87079	LRP1;WWC1;NDUFC2;PIK3R1;GNL1;SREBF2;SLC8A1;MAPK8IP1;PPP1CA;PSMB6;INF2;PPME1;PSME4;NHP2;RXRG;CAMK2G;UBXN6
Primary somatosensory area, mouth, layer 6b	17/301	0.0481434	0.430725	0	0	1.60563	4.87079	NPDC1;NDUFC2;ACTN4;TMEM196;TRHDE;HDDC3;PPP1CA;PSMB6;INF2;VPS72;FASN;SMPD1;PSME4;CHMP1A;DRD2;CAMK2G;UBXN6
Primary visual area, layer 5	17/301	0.0481434	0.430725	0	0	1.60563	4.87079	DPP10;TIMM8B;EGR2;FOS;PLCXD2;SYN1;HDDC3;ADAMTS4;NR4A3;VPS72;SMPD1;CHMP1A;TNRC18;STUB1;APBB1;MAP3K11;TPT1
Superior central nucleus raphe	17/301	0.0481434	0.430725	0	0	1.60563	4.87079	CREBZF;NTRK1;VPS18;COL11A1;STARD10;PPP1R16A;NDUFA2;ETFB;FSTL1;USE1;MRPL54;GLS;KRTCAP2;PDLIM2;VSNL1;FAM163A;ID3
Ventral group of the dorsal thalamus	17/301	0.0481434	0.430725	0	0	1.60563	4.87079	GPX1;KCNC2;NR2F1;ACSL3;SLC25A37;PRDX5;FAM163A;LRRTM1;FAM110B;FAM20C;NEK1;ITGB1BP1;TLN2;NEFH;GABRD;AVPI1;PTPN3
Ventral posterior complex of the thalamus	17/301	0.0481434	0.430725	0	0	1.60563	4.87079	HDAC5;GPX1;KCNC2;NR2F1;ACSL3;SLC25A37;PRDX5;FAM163A;LRRTM1;FAM110B;FAM20C;NEK1;TLN2;NEFH;GABRD;AVPI1;PTPN3
Ventral posterolateral nucleus of the thalamus	17/301	0.0481434	0.430725	0	0	1.60563	4.87079	GPX1;KCNIP1;KCNC2;NR2F1;ACSL3;SLC25A37;PRDX5;TMEM65;FAM163A;LRRTM1;FAM110B;FAM20C;NEK1;NEFH;GABRD;AVPI1;PTPN3
alar part of peduncular hypothalamus	17/301	0.0481434	0.430725	0	0	1.60563	4.87079	GABRQ;WSB1;GPX1;UNC5D;ESR1;ADRA2A;RPS15;EEF1B2;RESP18;PNOC;RPS3;ERP29;TMBIM6;RPS21;AAMP;VAT1L;PLEC
bed nucleus of the stria terminalis, medioseptal division	17/301	0.0481434	0.430725	0	0	1.60563	4.87079	GABRQ;WSB1;SLC32A1;PDYN;GPR6;TRHDE;ADCY5;TIAL1;EEF1B2;PENK;RPS2;TAC1;JUNB;RPS21;SF3B1;SSBP4;ITM2C
dorsal tuberomammillary nucleus, intermediate part (histaminergic)	17/301	0.0481434	0.430725	0	0	1.60563	4.87079	GABRQ;RBM14;RAB5C;RPS8;NME2;ABHD8;ADRA2A;TMEM145;KRTCAP2;PCSK1N;PITPNM1;KCTD10;ERP29;VIM;FCGR2B;VAT1L;NKTR
first (dorsal) preoptic domain	17/301	0.0481434	0.430725	0	0	1.60563	4.87079	GABRQ;NTRK1;WSB1;SLC32A1;NME3;NR2F2;ESR1;RPS15;RESP18;PNOC;DNER;ERP29;NDN;RPS21;AAMP;VAT1L;SSBP4
intermediate stratum of PPaA	17/301	0.0481434	0.430725	0	0	1.60563	4.87079	GABRQ;WSB1;RNASEK;GPX1;SLC32A1;CLU;ESR1;RPS15;EEF1B2;RESP18;PNOC;ERP29;NDN;TMBIM6;RPS21;AAMP;VAT1L
layer 6 of FCx	17/301	0.0481434	0.430725	0	0	1.60563	4.87079	ALAS2;EGR4;LRP1;WWC1;NDUFC2;PIK3R1;TMEM196;GNL1;HDDC3;PPP1CA;PSMB6;INF2;PPME1;SMPD1;PSME4;CAMK2G;UBXN6
lower basal perifornical nucleus	17/301	0.0481434	0.430725	0	0	1.60563	4.87079	GABRQ;ALDH1L1;ARPC1B;PCDHGC3;NME3;CLU;TRHDE;USE1;RPS26;PCSK1N;GNB2;DNER;ERP29;NDN;TKT;PFDN5;AAMP
mantle zone of DgSe	17/301	0.0481434	0.430725	0	0	1.60563	4.87079	NTRK1;WSB1;PLK5;SLC32A1;PPP1R16A;TMC7;ATP11B;ETFB;ESR1;TIAL1;TMEM65;ADORA2A;PENK;PNOC;DNER;NDN;SSBP4
mantle zone of JcPV	17/301	0.0481434	0.430725	0	0	1.60563	4.87079	CREBZF;ABCA2;RBM39;ALDH1L1;LRRC24;NDUFB5;COL11A1;ATP5G3;SEMA3F;KCNAB3;NDUFS8;VAMP1;SLC17A6;NEFH;RXRG;PVALB;SCN1A
mantle zone of PO1	17/301	0.0481434	0.430725	0	0	1.60563	4.87079	GABRQ;NTRK1;WSB1;SLC32A1;NME3;NR2F2;ESR1;RPS15;RESP18;PNOC;DNER;ERP29;NDN;RPS21;AAMP;VAT1L;SSBP4
mantle zone of VPrP	17/301	0.0481434	0.430725	0	0	1.60563	4.87079	KCNJ4;FIS1;SELPLG;EGLN2;EGR4;ARPP21;RGS14;SERPINA9;LIME1;ADORA2A;FRZB;ARHGDIA;NMT2;GNB5;DRD2;NGEF;TOMM6
mantle zone of r3BM	17/301	0.0481434	0.430725	0	0	1.60563	4.87079	RTN2;CREBZF;NDUFB9;OSBPL6;COX4I1;ESRRG;AARSD1;AGAP3;RND2;FSTL1;HAPLN4;GLS;PDLIM2;VSNL1;DDT;FAM163A;TMCC2
medial part of r3B	17/301	0.0481434	0.430725	0	0	1.60563	4.87079	RTN2;CREBZF;NDUFB9;OSBPL6;COX4I1;ESRRG;AARSD1;AGAP3;RND2;FSTL1;HAPLN4;GLS;PDLIM2;VSNL1;DDT;FAM163A;TMCC2
p1B part of the periaqueductal gray	17/301	0.0481434	0.430725	0	0	1.60563	4.87079	CREBZF;VPS18;LRRC24;COL11A1;STARD10;PPP1R16A;ETFB;USE1;KRTCAP2;TUBB3;PNOC;PSMB1;ERP29;FAU;DRD2;FCGR2B;NEFH
plexiform layer of TuPal	17/301	0.0481434	0.430725	0	0	1.60563	4.87079	LAMB2;LAPTM5;KCNA5;SERPINA9;PDYN;GPR6;TMEM164;ADCY5;BCR;ADORA2A;GNG7;GNB5;DRD2;TAC1;ARGLU1;GABRD;BCL9L
polymorph layer of TuPal	17/301	0.0481434	0.430725	0	0	1.60563	4.87079	TESC;KCNA5;SERPINA9;PDYN;ECSIT;GPR6;ADCY5;BCR;INF2;ADORA2A;GNG7;PITPNM2;PKIG;DRD2;TAC1;ARGLU1;RXRG
preoptic alar plate	17/301	0.0481434	0.430725	0	0	1.60563	4.87079	GABRQ;NTRK1;WSB1;UNC5D;NR2F2;ESR1;RPS15;EEF1B2;PCSK1N;RESP18;PNOC;ERP29;NDN;MGAT1;RPS21;VAT1L;SSBP4
preoptic telencephalon	17/301	0.0481434	0.430725	0	0	1.60563	4.87079	GABRQ;NTRK1;WSB1;UNC5D;NR2F2;ESR1;RPS15;EEF1B2;PCSK1N;RESP18;PNOC;ERP29;NDN;MGAT1;RPS21;VAT1L;SSBP4
r2 part of median raphe nucleus	17/301	0.0481434	0.430725	0	0	1.60563	4.87079	CREBZF;VPS18;PPP1R16A;ESRRG;ETFB;DNAJC15;FSTL1;USE1;GLS;LMF1;KRTCAP2;PDLIM2;VSNL1;DDT;FAM163A;ID3;RPL37
r4 part of reticulotegmental nucleus, shell portion	17/301	0.0481434	0.430725	0	0	1.60563	4.87079	CREBZF;OSBPL6;NDUFA6;SLC35C2;IQSEC3;ESRRG;SLC4A3;SGPP2;GLS;EFNB1;SNRK;NDUFS8;PDLIM2;TMEM65;DMWD;TMCC2;PKIG
septostriatal part of the olfactory tuberculum	17/301	0.0481434	0.430725	0	0	1.60563	4.87079	NTRK1;PHF2;NPY1R;KCNA5;SERPINA9;PDYN;SLC30A10;GPR6;ADCY5;BCR;ADORA2A;GNG7;PENK;PPP1R1B;TNRC18;DRD2;TAC1
sublayer 6a of PCx	17/301	0.0481434	0.430725	0	0	1.60563	4.87079	TTC14;CLSTN2;LRP1;WWC1;NDUFC2;PIK3R1;GNL1;HDDC3;MAPK8IP1;PPP1CA;INF2;PPME1;ZMIZ2;SMPD1;PSME4;CAMK2G;UBXN6
sublayer 6b of FCx	17/301	0.0481434	0.430725	0	0	1.60563	4.87079	NPDC1;ALAS2;LRP1;NDUFC2;PIK3R1;TMEM196;SLC8A1;HDDC3;PPP1CA;PSMB6;INF2;PPME1;FASN;SMPD1;PSME4;CAMK2G;UBXN6
sublayer 6b of InsCx	17/301	0.0481434	0.430725	0	0	1.60563	4.87079	NPDC1;ALAS2;PIK3R1;TMEM196;PSMA7;SLC8A1;HDDC3;PPP1CA;INF2;ADORA2A;PPIP5K2;FASN;SMPD1;ASPHD2;DRD2;CAMK2G;UBXN6
superficial stratum of CoPD	17/301	0.0481434	0.430725	0	0	1.60563	4.87079	MBD3;ZBTB17;SMARCD1;CRTC1;RCC2;ISLR2;SIPA1L3;PRRC2A;SLC25A27;GNG10;RPL18A;SREK1;MCM6;CCNL1;YPEL4;PPFIA2;MAPK3
superficial stratum of SeStr	17/301	0.0481434	0.430725	0	0	1.60563	4.87079	NTRK1;PHF2;NPY1R;KCNA5;SERPINA9;PDYN;SLC30A10;GPR6;ADCY5;BCR;ADORA2A;GNG7;PENK;PPP1R1B;TNRC18;DRD2;TAC1
ventral nuclei	17/301	0.0481434	0.430725	0	0	1.60563	4.87079	MRPS28;KCNC2;PCDHGC3;NR2F1;ACSL3;SLC25A37;PRDX5;FAM163A;LRRTM1;FAM110B;FAM20C;NEK1;ITGB1BP1;TLN2;GABRD;AVPI1;PTPN3
ventropallial prepiriform area	17/301	0.0481434	0.430725	0	0	1.60563	4.87079	KCNJ4;FIS1;SELPLG;EGLN2;EGR4;ARPP21;RGS14;SERPINA9;LIME1;ADORA2A;FRZB;ARHGDIA;NMT2;GNB5;DRD2;NGEF;TOMM6
Field CA1, stratum lacunosum-moleculare	20/383	0.0662773	0.578879	0	0	1.47799	4.01113	RAB5C;RGS14;TMEM200A;CRTC1;DCAKD;LAPTM5;ISLR2;LPL;SIPA1L3;TRAIP;GNG10;GRIN2A;NR4A3;NDST3;ASPHD2;MCM6;SRSF6;SF3B1;RAMP1;PPFIA2
Central amygdalar nucleus, capsular part	22/433	0.070935	0.578879	0	0	1.43635	3.80056	NECAB2;CAMK2D;EGLN2;SELPLG;NR2F1;GLT8D1;FBXL16;PDYN;CLU;LIME1;ADCY5;TRAIP;GAP43;TCEAL5;ADORA2A;RPS19;PNOC;PENK;DRD2;RXRG;PSPH;TOMM6
Field CA2, stratum radiatum	21/410	0.0715001	0.578879	0	0	1.44823	3.82051	RAB5C;CLSTN2;RGS14;LRRN2;ISLR2;LPL;PPM1E;SIPA1L3;SLC8A1;GLS;MRPL11;TRAIP;PPP1R9B;MRPL53;GRIN2A;NR4A3;FRZB;POLD2;NEK1;ASPHD2;PABPC1
Field CA1	18/344	0.077153	0.578879	0	0	1.47986	3.79136	EGLN2;RAB5C;OSBPL6;RGS14;TMEM200A;SLC35C2;LPL;SIPA1L3;SLC8A1;MRPL11;TRAIP;MRPL53;GNG10;GRIN2A;PRPF39;NR4A3;NDST3;RAMP1
Ammon's horn	16/301	0.0824697	0.578879	0	0	1.50367	3.75216	OSBPL6;CLSTN2;RGS14;LRRN2;ISLR2;LPL;SIPA1L3;MRPL11;TRAIP;MRPL53;GNG10;GRIN2A;NR4A3;ASPHD2;RAMP1;PPFIA2
Basic cell groups and regions	16/301	0.0824697	0.578879	0	0	1.50367	3.75216	KCNJ4;KCNH3;SLC35C2;LPL;ICAM5;SERPINA9;GPR6;TMEM198;GRIN2A;ADORA2A;FRZB;NDST3;DLGAP3;DRD2;CRYM;GABRD
Bed nuclei of the stria terminalis, anterior division, fusiform nucleus	16/301	0.0824697	0.578879	0	0	1.50367	3.75216	GABRQ;NTRK1;SLC32A1;ATP11B;PDYN;GPR6;ADCY5;TIAL1;RPS15;ADORA2A;PENK;NDN;ITGB1BP1;DRD2;AAMP;C1QC
Central linear nucleus raphe	16/301	0.0824697	0.578879	0	0	1.50367	3.75216	GABRQ;CREBZF;VPS18;COL11A1;STARD10;LPL;ETFB;USE1;GLS;KRTCAP2;GNG2;PDLIM2;PNOC;STX3;SLIT2;DRD2
Dentate gyrus, molecular layer	16/301	0.0824697	0.578879	0	0	1.50367	3.75216	PLK5;CLSTN2;CRTC1;DCAKD;ISLR2;SIPA1L3;NCOR2;GNG10;GRIN2A;PITPNM2;PABPC1;SREK1;MCM6;RPS10;PPFIA2;MAPK3
Dorsomedial nucleus of the hypothalamus, anterior part	16/301	0.0824697	0.578879	0	0	1.50367	3.75216	GABRQ;WSB1;RPS8;APLP1;ABHD8;ESR1;ADRA2A;KRTCAP2;PCSK1N;PITPNM1;ERP29;VIM;LGALS8;PFDN5;AAMP;VAT1L
Field CA3, stratum lucidum	16/301	0.0824697	0.578879	0	0	1.50367	3.75216	IPO13;CLSTN2;LRRN2;ISLR2;LPL;SIPA1L3;TRHDE;MRPL11;TRAIP;PPP1R9B;NR4A3;FRZB;ASPHD2;PABPC1;SRSF6;PPIB
Globus pallidus, external segment	16/301	0.0824697	0.578879	0	0	1.50367	3.75216	NTRK1;KCNJ4;GPX1;TESC;ESRRG;SERPINA9;PDYN;GPR6;TMEM164;ADCY5;TRAIP;BCR;INF2;ADORA2A;DRD2;GABRD
Lateral posterior nucleus of the thalamus	16/301	0.0824697	0.578879	0	0	1.50367	3.75216	PLK5;LRRN2;KCNC2;RCC2;DCAKD;PCDHGC3;PARK7;SIPA1L3;LRRTM1;FAM110B;FAM20C;SBF1;YPEL4;AVPI1;PPFIA2;PTPN3
Lateral septal complex	16/301	0.0824697	0.578879	0	0	1.50367	3.75216	NECAB2;SLC32A1;PDYN;GPR6;TRHDE;SLC8A1;ADCY5;TRAIP;ADORA2A;PENK;PNOC;GUF1;MFGE8;DRD2;CRYM;PLTP
Medial preoptic area	16/301	0.0824697	0.578879	0	0	1.50367	3.75216	GABRQ;NTRK1;WSB1;NR2F2;ESR1;PCSK1N;PITPNM1;TMEM215;GNB2;PNOC;DNER;ERP29;NDN;RPS21;MAP3K11;SSBP4
Nucleus of the optic tract	16/301	0.0824697	0.578879	0	0	1.50367	3.75216	MBD3;ZBTB17;RCC2;DCAKD;LAPTM5;ISLR2;SIPA1L3;GNG10;RPL18A;GJB6;SREK1;MCM6;CCNL1;TOMM6;PPFIA2;MAPK3
Olfactory tubercle, molecular layer	16/301	0.0824697	0.578879	0	0	1.50367	3.75216	KCNJ4;KCNA5;SERPINA9;YBX1;PDYN;GPR6;ADCY5;BCR;ADORA2A;GNG7;PENK;GNB5;DRD2;TAC1;RXRG;BCL9L
Orbital area, lateral part, layer 6a	16/301	0.0824697	0.578879	0	0	1.50367	3.75216	LRRC24;EGR4;LRP1;CCDC124;NDUFC2;ARPC4;PIK3R1;TMEM196;SREBF2;PSMB6;INF2;PPME1;SMPD1;ASPHD2;UBQLN4;UBXN6
Pontine reticular nucleus	16/301	0.0824697	0.578879	0	0	1.50367	3.75216	RTN2;CREBZF;NDUFB5;S100B;FSTL1;TUBB4A;SGPP2;TTBK1;GLS;YIF1B;PRDX2;GRHPR;PDLIM2;DNPEP;DDT;YPEL5
Posterolateral visual area, layer 6b	16/301	0.0824697	0.578879	0	0	1.50367	3.75216	ANKRD29;CLSTN2;NCAPH2;NR2F1;FBXL16;PRKCZ;TRHDE;SLC8A1;PRDX2;GNG2;ZMIZ2;FASN;SMPD1;CHMP1A;APBB1;MAP3K11
Presubiculum, layer 3	16/301	0.0824697	0.578879	0	0	1.50367	3.75216	EPHA5;HDAC5;ARPP21;CLSTN2;TMEM200A;NRXN1;PIK3R1;FBXL16;TRHDE;SLC8A1;MRPL11;NDST3;ZMYM6;ID3;SERPINI1;RXRG
Primary motor area, Layer 6a	16/301	0.0824697	0.578879	0	0	1.50367	3.75216	LRRC24;EGR4;LRP1;WWC1;NDUFA2;NDUFC2;ARPC4;PIK3R1;GNL1;HDDC3;PPP1CA;PSMB6;PPME1;SMPD1;PSME4;UBXN6
Primary somatosensory area, mouth, layer 4	16/301	0.0824697	0.578879	0	0	1.50367	3.75216	TIMM8B;SPHK2;NME3;PLCXD2;HDDC3;GNG10;BLOC1S1;VPS72;TMEM215;CWC22;DNAJC21;POLD2;MYO18A;TNRC18;STUB1;DLGAP3
Primary somatosensory area, nose, layer 6b	16/301	0.0824697	0.578879	0	0	1.50367	3.75216	HDAC5;SELPLG;NOTCH1;SPHK2;ACTN4;TRHDE;MAPK8IP1;PPP1R9B;VPS72;NDUFS6;CHMP1A;BANF1;STUB1;APBB1;UBXN6;PSPH
Subiculum, dorsal part, molecular layer	16/301	0.0824697	0.578879	0	0	1.50367	3.75216	OSBPL6;RGS14;TMEM200A;SIPA1L3;CLU;TRAIP;GNG10;GRIN2A;NDST3;ID3;MCM6;RPS10;SF3B1;RAMP1;PPFIA2;MAPK3
Ventral premammillary nucleus	16/301	0.0824697	0.578879	0	0	1.50367	3.75216	GABRQ;CREBZF;PCDHGC3;NPY1R;KCNA5;AARSD1;CLU;TRHDE;ESR1;DPM3;PCSK1N;ALDH2;DMWD;GNB2;POLD2;STX3
amygdalohippocampal area	16/301	0.0824697	0.578879	0	0	1.50367	3.75216	IPO13;EGLN2;RGS14;LRRN2;NR2F1;LPL;UNC5D;PRKCZ;LIME1;ESR1;DMWD;PDCD4;PKIG;MET;TOMM6;MAPK3
core of P-DMH	16/301	0.0824697	0.578879	0	0	1.50367	3.75216	GABRQ;RBM14;PCDHGC3;ESR1;ADRA2A;CST3;DUSP11;KRTCAP2;PCSK1N;PITPNM1;GNB2;ERP29;APOE;VIM;RAMP1;NKTR
diagonal domain	16/301	0.0824697	0.578879	0	0	1.50367	3.75216	NTRK1;GPX1;SLC32A1;NR2F2;SERPINA9;PDYN;GPR6;TMEM164;ADCY5;BCR;INF2;TMEM65;ADORA2A;MGAT1;DRD2;PLEC
diagonal part of septum	16/301	0.0824697	0.578879	0	0	1.50367	3.75216	NTRK1;WSB1;PLK5;SLC32A1;PPP1R16A;TMC7;ATP11B;ETFB;ESR1;TIAL1;TMEM65;ADORA2A;PENK;DNER;NDN;SSBP4
hypothalamic amygdala	16/301	0.0824697	0.578879	0	0	1.50367	3.75216	NECAB2;CAMK2D;EGLN2;NR2F1;NME3;UNC5D;LIME1;ESR1;ADCY5;RPS19;TMEM215;PNOC;DNER;MET;C2CD2L;TOMM6
intercalate nucleus	16/301	0.0824697	0.578879	0	0	1.50367	3.75216	GPX1;SLC32A1;KCNIP1;NR2F1;ESRRG;ACSL3;ADRA2A;PRDX5;LRRTM1;PNOC;FAM20C;TLN2;QRFPR;GABRD;AVPI1;PTPN3
intermediate stratum of JcPV	16/301	0.0824697	0.578879	0	0	1.50367	3.75216	CREBZF;RBM39;ALDH1L1;NDUFB5;COL11A1;ATP5G3;SEMA3F;KCNAB3;TMEM145;NDUFS8;VAMP1;SLC17A6;NEFH;NDUFV1;PVALB;SCN1A
intermediate stratum of THyB-I	16/301	0.0824697	0.578879	0	0	1.50367	3.75216	GABRQ;ARPC1B;KCNA5;AARSD1;ESR1;DPM3;PCSK1N;RPS19;FRZB;DMWD;POLD2;ERP29;STX3;SLIT2;VIM;SSBP4
intermediate stratum of m2B	16/301	0.0824697	0.578879	0	0	1.50367	3.75216	ABCA2;ALDH1L1;LRRC24;NDUFB5;SLC35C2;COL11A1;ESRRG;RND2;TUBB4A;SGPP2;ZFP14;DNPEP;DDT;PNOC;FGFR1OP;DRD2
intermediate stratum of p3ZL	16/301	0.0824697	0.578879	0	0	1.50367	3.75216	GPX1;SLC32A1;KCNIP1;NR2F1;ESRRG;ACSL3;ADRA2A;PRDX5;LRRTM1;PNOC;FAM20C;TLN2;QRFPR;GABRD;AVPI1;PTPN3
internal globus pallidus	16/301	0.0824697	0.578879	0	0	1.50367	3.75216	NTRK1;GSN;GPX1;ESRRG;SERPINA9;PDYN;GPR6;TMEM164;ADCY5;TRAIP;BCR;ADAMTS4;INF2;ADORA2A;DRD2;GABRD
lateral part of PcP	16/301	0.0824697	0.578879	0	0	1.50367	3.75216	PLK5;KCNC2;RCC2;DCAKD;PCDHGC3;LAPTM5;SIPA1L3;TIAL1;LRRTM1;FAM110B;SREK1;MCM6;GABRD;PPFIA2;CDH19;PTPN3
layer 6 of InsCx	16/301	0.0824697	0.578879	0	0	1.50367	3.75216	TIMM8B;NDUFC2;ACTN4;PIK3R1;TMEM196;TRHDE;PPP1CA;PRPF39;GNG2;KCTD10;VPS72;CHMP1A;CWC22;STUB1;APBB1;PSPH
layer 6 of RSC	16/301	0.0824697	0.578879	0	0	1.50367	3.75216	EPHA5;ANKRD29;RBM14;CLSTN2;NCAPH2;NR2F1;FBXL16;PRKCZ;TRHDE;SLC8A1;GNG2;ZMIZ2;FASN;CHMP1A;JUNB;MAP3K11
mantle zone of PalSe	16/301	0.0824697	0.578879	0	0	1.50367	3.75216	NTRK1;SLC32A1;TMC7;SERPINA9;PDYN;GPR6;TRHDE;ADCY5;TIAL1;ADORA2A;PNOC;GUF1;DRD2;PLTP;SSBP4;ITM2C
mantle zone of PcPL	16/301	0.0824697	0.578879	0	0	1.50367	3.75216	PLK5;KCNC2;RCC2;DCAKD;PCDHGC3;LAPTM5;SIPA1L3;TIAL1;LRRTM1;FAM110B;SREK1;MCM6;GABRD;PPFIA2;CDH19;PTPN3
mantle zone of PrS	16/301	0.0824697	0.578879	0	0	1.50367	3.75216	EPHA5;HDAC5;RBM14;CLSTN2;TMEM200A;NPY1R;PTPRK;TRHDE;SLC8A1;EFNB1;TCEAL5;MCM6;SBF1;RXRG;PSPH;MAPK3
mantle zone of S	16/301	0.0824697	0.578879	0	0	1.50367	3.75216	RBM14;OSBPL6;RGS14;TMEM200A;SLC35C2;DDX54;SRP14;SIPA1L3;SLC8A1;TRAIP;GNG10;GRIN2A;PRPF39;TCEAL5;NDST3;RAMP1
mantle zone of SeDg	16/301	0.0824697	0.578879	0	0	1.50367	3.75216	NTRK1;SLC32A1;KCNA5;ATP11B;SERPINA9;PDYN;GPR6;ADCY5;ADORA2A;PENK;ITGB1BP1;DRD2;TAC1;RPS21;SSBP4;C1QC
pallidal septum	16/301	0.0824697	0.578879	0	0	1.50367	3.75216	NTRK1;SLC32A1;STXBP2;TMC7;SERPINA9;PDYN;GPR6;TRHDE;ADCY5;TIAL1;ADORA2A;GUF1;DRD2;PLTP;SSBP4;ITM2C
paraventricular nucleus, lateral part	16/301	0.0824697	0.578879	0	0	1.50367	3.75216	GABRQ;WSB1;SLC32A1;ADRA2A;RPS15;RPS26;TMEM145;PCSK1N;DPYSL2;PNOC;RPL14;ERP29;NDN;LGALS8;PFDN5;VAT1L
paraventricular nucleus, peduncular or principal part	16/301	0.0824697	0.578879	0	0	1.50367	3.75216	DDR1;GABRQ;FIS1;WSB1;KCNA5;ESR1;TIAL1;CLDN5;PCSK1N;GAP43;PITPNM1;GJB6;ERP29;RPS2;VAT1L;NKTR
periventricular stratum of PPaA	16/301	0.0824697	0.578879	0	0	1.50367	3.75216	DDR1;GABRQ;FIS1;WSB1;KCNA5;ESR1;TIAL1;CLDN5;PCSK1N;GAP43;PITPNM1;GJB6;ERP29;RPS2;VAT1L;NKTR
pontine hindbrain	16/301	0.0824697	0.578879	0	0	1.50367	3.75216	RTN2;CREBZF;OSBPL6;RHOG;ESRRG;S100B;FSTL1;TUBB4A;SGPP2;GLS;GRHPR;PDLIM2;PPIP5K2;DDT;POLD2;TMCC2
r4 basal plate	16/301	0.0824697	0.578879	0	0	1.50367	3.75216	RTN2;CREBZF;OSBPL6;IQSEC3;RHOG;ESRRG;AGAP3;SLC30A10;FSTL1;SGPP2;GLS;KRTCAP2;DPM3;PDLIM2;TMCC2;MCM2
r4 part of medial pontine nuclei	16/301	0.0824697	0.578879	0	0	1.50367	3.75216	RTN2;CAMK2D;OSBPL6;IQSEC3;RHOG;ESRRG;AGAP3;SLC30A10;ADRA2A;GLS;EFNB1;KRTCAP2;PDLIM2;POLD2;TMCC2;MCM2
rhombomere 3	16/301	0.0824697	0.578879	0	0	1.50367	3.75216	RTN2;CREBZF;OSBPL6;SLC35C2;ESRRG;RND2;FSTL1;TUBB4A;HAPLN4;SGPP2;GLS;GRHPR;PDLIM2;DDT;TMCC2;PVALB
rhombomere 4	16/301	0.0824697	0.578879	0	0	1.50367	3.75216	RTN2;CREBZF;OSBPL6;RHOG;ESRRG;S100B;FSTL1;TUBB4A;SGPP2;GLS;KRTCAP2;PDLIM2;PPIP5K2;DDT;POLD2;TMCC2
root	16/301	0.0824697	0.578879	0	0	1.50367	3.75216	KCNJ4;KCNH3;LPL;ICAM5;SERPINA9;GPR6;CLU;TMEM198;GRIN2A;ADORA2A;FRZB;NDST3;DLGAP3;DRD2;CRYM;GABRD
septodiagonal transition area	16/301	0.0824697	0.578879	0	0	1.50367	3.75216	NTRK1;SLC32A1;KCNA5;ATP11B;SERPINA9;PDYN;GPR6;ADCY5;ADORA2A;PENK;ITGB1BP1;DRD2;TAC1;RPS21;SSBP4;C1QC
septopallidal part of the olfactory tuberculum	16/301	0.0824697	0.578879	0	0	1.50367	3.75216	NTRK1;LAMB2;NPY1R;KCNA5;SERPINA9;PDYN;GPR6;ADCY5;INF2;ADORA2A;GNG7;PENK;LCN2;DRD2;TAC1;RXRG
shell of T-DMH	16/301	0.0824697	0.578879	0	0	1.50367	3.75216	GABRQ;ARPC1B;PCDHGC3;KCNA5;AARSD1;ESR1;DPM3;PCSK1N;RPS19;GNB2;POLD2;ERP29;STX3;SLIT2;VIM;SSBP4
subpallial septum	16/301	0.0824697	0.578879	0	0	1.50367	3.75216	NECAB2;NTRK1;SREBF1;SLC32A1;TMC7;GPR6;TRHDE;SLC8A1;ADCY5;ADORA2A;PENK;PNOC;GUF1;MFGE8;DRD2;SSBP4
superficial stratum of AHy	16/301	0.0824697	0.578879	0	0	1.50367	3.75216	NECAB2;CAMK2D;EGLN2;NR2F1;NME3;UNC5D;LIME1;ESR1;ADCY5;RPS19;TMEM215;PNOC;DNER;MET;C2CD2L;TOMM6
superficial stratum of SePal	16/301	0.0824697	0.578879	0	0	1.50367	3.75216	NTRK1;PHF2;LAMB2;NPY1R;KCNA5;SERPINA9;PDYN;GPR6;ADCY5;INF2;ADORA2A;GNG7;PENK;LCN2;DRD2;TAC1
superficial stratum of r4BM	16/301	0.0824697	0.578879	0	0	1.50367	3.75216	RTN2;CAMK2D;OSBPL6;IQSEC3;RHOG;ESRRG;AGAP3;SLC30A10;ADRA2A;GLS;EFNB1;KRTCAP2;PDLIM2;POLD2;TMCC2;MCM2
tegmental field of p3 (Forel's field)	16/301	0.0824697	0.578879	0	0	1.50367	3.75216	GABRQ;CREBZF;ALDH1L1;LRRC24;RPS8;COL11A1;ABHD8;SEMA3F;PLCXD2;USE1;TMEM145;DNPEP;DNER;TMBIM6;TKT;DRD2
ventral juxtacommissural pretectal nucleus	16/301	0.0824697	0.578879	0	0	1.50367	3.75216	CREBZF;RBM39;ALDH1L1;NDUFB5;COL11A1;ATP5G3;SEMA3F;KCNAB3;TMEM145;NDUFS8;VAMP1;SLC17A6;NEFH;NDUFV1;PVALB;SCN1A
ventral part of JcP	16/301	0.0824697	0.578879	0	0	1.50367	3.75216	CREBZF;ABCA2;RBM39;ALDH1L1;LRRC24;NDUFB5;COL11A1;ATP5G3;SEMA3F;KCNAB3;NDUFS8;VAMP1;SLC17A6;NEFH;PVALB;SCN1A
ventral posterolateral nucleus	16/301	0.0824697	0.578879	0	0	1.50367	3.75216	GPX1;KCNC2;NR2F1;DNAJC15;SLC25A37;PRDX5;FAM163A;LRRTM1;FAM110B;FAM20C;NEK1;QRFPR;NEFH;GABRD;AVPI1;PTPN3
ventral posteromedial nucleus	16/301	0.0824697	0.578879	0	0	1.50367	3.75216	HDAC5;KCNC2;PCDHGC3;NR2F1;DNAJC15;SLC25A37;PRDX5;FAM110B;FAM20C;NEK1;ITGB1BP1;TLN2;NEFH;GABRD;AVPI1;PTPN3
Central amygdalar nucleus, lateral part	20/401	0.0943231	0.659959	0	0	1.40682	3.32155	ANKRD29;SELPLG;LAMB2;GLT8D1;PDYN;ADCY5;TRAIP;TCEAL5;ADORA2A;BLOC1S1;SLC25A19;CROCC;CDC37;PENK;PPP1R1B;BANF1;DRD2;MFGE8;JUNB;PSPH
Subiculum	19/389	0.116747	0.739636	0	0	1.37507	2.9533	RBM14;OSBPL6;RGS14;TMEM200A;LPL;DDX54;SRP14;SIPA1L3;SLC8A1;TRAIP;GRIN2A;GNG10;PRPF39;TCEAL5;NR4A3;NDST3;RXRG;RAMP1;PSPH
Anterior amygdalar area	15/301	0.133832	0.739636	0	0	1.40271	2.82109	NECAB2;CAMK2D;EGLN2;NR2F1;NME3;ATP11B;AARSD1;LIME1;KRTCAP2;DPM3;RPS19;TMEM65;RXRG;TOMM6;BCL9L
Basolateral amygdalar nucleus, ventral part	15/301	0.133832	0.739636	0	0	1.40271	2.82109	NECAB2;TTC14;CAMK2D;EGLN2;NR2F1;GLT8D1;LPL;EDF1;PRKCZ;LIME1;ESR1;PPP1R9B;RBM15B;TCEAL5;JUNB
Cortical amygdalar area, posterior part, medial zone, layer 3	15/301	0.133832	0.739636	0	0	1.40271	2.82109	IPO13;CAMK2D;EGLN2;RGS14;NR2F1;LPL;PRKCZ;LIME1;ESR1;DMWD;GNG7;PKIG;RXRG;MET;MAPK3
Dentate gyrus, granule cell layer	15/301	0.133832	0.739636	0	0	1.40271	2.82109	IPO13;CLSTN2;RPLP0;ISLR2;SIPA1L3;NCOR2;PITPNM2;ASPHD2;PABPC1;FAU;SREK1;MCM6;RPS10;PPFIA2;MAPK3
Field CA1, stratum pyramidale	15/301	0.133832	0.739636	0	0	1.40271	2.82109	RBM14;EGLN2;OSBPL6;RGS14;LPL;SRP14;SIPA1L3;SLC8A1;MRPL11;TRAIP;GNG10;GRIN2A;PRPF39;NR4A3;NDST3
Field CA2, stratum pyramidale	15/301	0.133832	0.739636	0	0	1.40271	2.82109	RBM14;EGLN2;OSBPL6;RGS14;LPL;SIPA1L3;SLC8A1;TRAIP;GRIN2A;TCEAL5;NR4A3;CDC37;NEK1;SLIT2;PLTP
Gustatory areas, layer 6a	15/301	0.133832	0.739636	0	0	1.40271	2.82109	GTF3C1;TIMM8B;SELPLG;NDUFC2;TMC7;ACTN4;PPP1CA;PPP1R9B;GNG2;KCTD10;VPS72;CHMP1A;CWC22;STUB1;APBB1
Interstitial nucleus of Cajal	15/301	0.133832	0.739636	0	0	1.40271	2.82109	CREBZF;VPS18;LRRC24;USP54;COL11A1;TNK2;STARD10;KRTCAP2;DNPEP;PPIP5K2;PNOC;PSMB1;VAMP1;DRD2;FCGR2B
Lateral group of the dorsal thalamus	15/301	0.133832	0.739636	0	0	1.40271	2.82109	MRPS28;LRRN2;KCNC2;RCC2;DCAKD;PCDHGC3;SIPA1L3;SLC25A37;LRRTM1;FAM110B;FAM20C;GABRD;RXRG;AVPI1;PTPN3
Lateral hypothalamic area	15/301	0.133832	0.739636	0	0	1.40271	2.82109	GABRQ;CLU;ESR1;ADRA2A;RPS15;PCSK1N;BLOC1S1;ERP29;VWA1;NDN;MGAT1;TMBIM6;RPS21;AAMP;VAT1L
Lateral preoptic area	15/301	0.133832	0.739636	0	0	1.40271	2.82109	GABRQ;NTRK1;WSB1;SLC32A1;ATP11B;NR2F2;PDYN;ESR1;ADORA2A;PNOC;NDN;MGAT1;RPS21;AAMP;SSBP4
Median preoptic nucleus	15/301	0.133832	0.739636	0	0	1.40271	2.82109	DDR1;GABRQ;NTRK1;FIS1;WSB1;SLC2A1;CLU;ESR1;TIAL1;GNB2;PNOC;ERP29;NDN;TKT;SSBP4
Midline group of the dorsal thalamus	15/301	0.133832	0.739636	0	0	1.40271	2.82109	MRPS28;NTRK1;CAMK2D;KCNC2;LAPTM5;ACSL3;CLU;TRAIP;FASN;SLC17A6;TLN2;STX3;FCGR2B;AVPI1;PTPN3
Mus musculus	15/301	0.133832	0.739636	0	0	1.40271	2.82109	KCNJ4;LPL;ICAM5;SERPINA9;GPR6;CLU;TMEM198;GRIN2A;ADORA2A;FRZB;NDST3;DLGAP3;DRD2;CRYM;GABRD
Pallidum, dorsal region	15/301	0.133832	0.739636	0	0	1.40271	2.82109	NTRK1;GPX1;ESRRG;SERPINA9;PDYN;GPR6;TMEM164;ADCY5;TRAIP;BCR;ADAMTS4;INF2;ADORA2A;DRD2;GABRD
Pons, behavioral state related	15/301	0.133832	0.739636	0	0	1.40271	2.82109	RTN2;CREBZF;NDUFB5;S100B;FSTL1;TUBB4A;SGPP2;GLS;PRDX2;GRHPR;KRTCAP2;PDLIM2;DNPEP;DDT;FAM163A
Primary somatosensory area, barrel field, layer 6b	15/301	0.133832	0.739636	0	0	1.40271	2.82109	TIMM8B;SPHK2;ACTN4;TRHDE;SLC8A1;MAPK8IP1;PPP1R9B;VPS72;CHMP1A;BANF1;STUB1;APBB1;CAMK2G;UBXN6;PSPH
Primary somatosensory area, lower limb, layer 6b	15/301	0.133832	0.739636	0	0	1.40271	2.82109	CLSTN2;LRP1;NDUFC2;PIK3R1;GNL1;PSMA7;SLC8A1;HDDC3;PPP1CA;INF2;PPME1;PSME4;AP2S1;CAMK2G;UBXN6
Primary somatosensory area, nose, layer 6a	15/301	0.133832	0.739636	0	0	1.40271	2.82109	TIMM8B;CLSTN2;SPHK2;ACTN4;TMEM196;TRHDE;PPP1R9B;KCTD10;VPS72;CHMP1A;CWC22;BANF1;STUB1;APBB1;UBXN6
Subiculum, dorsal part, pyramidal layer	15/301	0.133832	0.739636	0	0	1.40271	2.82109	OSBPL6;LRP1;RGS14;TMEM200A;SIPA1L3;CLU;SLC8A1;TRAIP;BCR;GRIN2A;NR4A3;NDST3;SF3B1;RXRG;RAMP1
Subiculum, ventral part, stratum radiatum	15/301	0.133832	0.739636	0	0	1.40271	2.82109	EGLN2;OSBPL6;LPL;SRP14;SLC8A1;GLS;MRPL11;TRAIP;TCEAL5;NR4A3;DDAH2;NDST3;CHMP1A;CWC22;SLIT2
Superior central nucleus raphe, lateral part	15/301	0.133832	0.739636	0	0	1.40271	2.82109	CREBZF;NTRK1;VPS18;COL11A1;STARD10;PPP1R16A;NDUFA2;FSTL1;MRPL54;GLS;KRTCAP2;PDLIM2;VSNL1;FAM163A;RXRG
Thalamus, sensory-motor cortex related	15/301	0.133832	0.739636	0	0	1.40271	2.82109	MRPS28;KCNC2;NR2F1;ACSL3;SLC25A37;FAM163A;LRRTM1;FAM110B;FAM20C;NEK1;TLN2;NEFH;GABRD;AVPI1;PTPN3
Ventral posteromedial nucleus of the thalamus	15/301	0.133832	0.739636	0	0	1.40271	2.82109	HDAC5;LRRN2;KCNC2;PCDHGC3;NR2F1;DNAJC15;SLC25A37;PRDX5;FAM110B;FAM20C;NEK1;NEFH;GABRD;AVPI1;PTPN3
Ventromedial hypothalamic nucleus, dorsomedial part	15/301	0.133832	0.739636	0	0	1.40271	2.82109	WSB1;STXBP2;PCDHGC3;KCNA5;ESR1;TRAIP;KRTCAP2;PCSK1N;PITPNM1;GNB2;ERP29;NDN;SLIT2;VIM;LGALS8
alar plate of p2 (alar thalamus)	15/301	0.133832	0.739636	0	0	1.40271	2.82109	MRPS28;LRRN2;KCNC2;DCAKD;ACSL3;SLC25A37;BLOC1S1;LRRTM1;FAM110B;FAM20C;NEK1;TLN2;GABRD;AVPI1;PTPN3
basomedial amygdaloid nucleus, posterior part	15/301	0.133832	0.739636	0	0	1.40271	2.82109	IPO13;TTC14;CAMK2D;EGLN2;NR2F1;GLT8D1;LPL;EDF1;PRKCZ;LIME1;ESR1;DMWD;DNER;PKIG;MAPK3
central lateral nucleus	15/301	0.133832	0.739636	0	0	1.40271	2.82109	MRPS28;GABRB2;KCNC2;DCAKD;PCDHGC3;ACSL3;SLC25A37;BLOC1S1;LRRTM1;FAM110B;FAM20C;TLN2;GABRD;AVPI1;PTPN3
corticoid layer of TuPal	15/301	0.133832	0.739636	0	0	1.40271	2.82109	KCNA5;SERPINA9;PDYN;GPR6;ADCY5;BCR;INF2;ADORA2A;GNG7;PITPNM2;DRD2;TAC1;ARGLU1;RXRG;BCL9L
deep gray layer of SC	15/301	0.133832	0.739636	0	0	1.40271	2.82109	ALDH1L1;RPS8;COL11A1;RASGRF2;NR2F2;PTPRK;SEMA3F;RND2;KCNAB3;PLCXD2;DISP2;GJB6;VAMP1;SLC17A6;TAC1
diencephalon	15/301	0.133832	0.739636	0	0	1.40271	2.82109	MRPS28;GPX1;KCNC2;DCAKD;ACSL3;CLU;SLC25A37;LRRTM1;FAM110B;FAM20C;NEK1;TLN2;GABRD;AVPI1;PTPN3
dorsal part of PHyB	15/301	0.133832	0.739636	0	0	1.40271	2.82109	GABRQ;WSB1;NME3;ESR1;ADRA2A;RPS15;RPS26;PCSK1N;ERP29;NDN;TMBIM6;RPS21;PFDN5;AAMP;VAT1L
dorsal subnucleus of MG	15/301	0.133832	0.739636	0	0	1.40271	2.82109	MRPS28;VPS18;PLK5;EGR4;KCNC2;DCAKD;SIPA1L3;CLK4;VTN;RPL18A;VPS72;PABPC1;GABRD;TOMM6;PTPN3
dorsal tier of thalamus	15/301	0.133832	0.739636	0	0	1.40271	2.82109	MRPS28;LRRN2;KCNC2;DCAKD;ACSL3;SLC25A37;BLOC1S1;LRRTM1;FAM110B;FAM20C;NEK1;TLN2;GABRD;AVPI1;PTPN3
dorsomedial nucleus, terminal part	15/301	0.133832	0.739636	0	0	1.40271	2.82109	GABRQ;PCDHGC3;KCNA5;AARSD1;ESR1;DPM3;PCSK1N;RPS19;GNB2;POLD2;ERP29;STX3;SLIT2;VIM;SSBP4
dorsomedial part of VMH	15/301	0.133832	0.739636	0	0	1.40271	2.82109	WSB1;STXBP2;PCDHGC3;KCNA5;ESR1;TRAIP;DPM3;PCSK1N;PITPNM1;GNB2;ERP29;SLIT2;VIM;LGALS8;RAMP1
intermediate part of StrSe	15/301	0.133832	0.739636	0	0	1.40271	2.82109	SLC32A1;FOS;GPR6;CLU;TRHDE;SLC8A1;ADCY5;ADORA2A;PENK;GUF1;MFGE8;DRD2;NGEF;SSBP4;ITM2C
intermediate part of the arcuate nucleus	15/301	0.133832	0.739636	0	0	1.40271	2.82109	GABRQ;ARPC1B;KCNA5;ESR1;ADCY5;DPM3;PCSK1N;FRZB;DMWD;POLD2;PLXNB2;STX3;SLIT2;RPS10;SSBP4
intermediate periretromammillary nucleus	15/301	0.133832	0.739636	0	0	1.40271	2.82109	GABRQ;CREBZF;CLSTN2;COL11A1;ABHD8;CLU;SCAMP4;TMEM145;PCSK1N;GNB2;DNER;ERP29;RPL37;PFDN5;NKTR
intermediate stratum of AStr	15/301	0.133832	0.739636	0	0	1.40271	2.82109	ANKRD29;SELPLG;GLT8D1;PDYN;ADCY5;TRAIP;EFNB1;TCEAL5;ADORA2A;PENK;MFGE8;DRD2;JUNB;RXRG;PSPH
intermediate stratum of JcPL	15/301	0.133832	0.739636	0	0	1.40271	2.82109	ZBTB17;RCC2;DCAKD;LAPTM5;SEMA3F;SIPA1L3;TIAL1;VTN;RPL18A;GJB6;SREK1;MCM6;SBF1;PPFIA2;CDH19
intermediate stratum of PHyB-I	15/301	0.133832	0.739636	0	0	1.40271	2.82109	GABRQ;WSB1;PCDHGC3;ESR1;ADRA2A;SOD1;PCSK1N;PITPNM1;GNB2;DNER;ERP29;NDN;TKT;PFDN5;AAMP
intermediate stratum of POH	15/301	0.133832	0.739636	0	0	1.40271	2.82109	GABRQ;PCDHGC3;NR2F2;RPL8;ESR1;RPS15;EEF1B2;PCSK1N;PNOC;ERP29;NDN;RPS21;MAP3K11;VAT1L;SSBP4
intermediate stratum of m1B	15/301	0.133832	0.739636	0	0	1.40271	2.82109	CREBZF;ALDH1L1;LRRC24;KCNG4;NDUFB5;COL11A1;ESRRG;NDUFC1;RND2;SGPP2;ZFP14;DNPEP;PPIP5K2;FGFR1OP;DRD2
intermediate stratum of the VAP	15/301	0.133832	0.739636	0	0	1.40271	2.82109	NECAB2;TTC14;CAMK2D;EGLN2;NR2F1;GLT8D1;LPL;EDF1;PRKCZ;LIME1;ESR1;DMWD;DNER;PKIG;TOMM6
intermediate tier of thalamus	15/301	0.133832	0.739636	0	0	1.40271	2.82109	MRPS28;CAMK2D;PLK5;KCNC2;DCAKD;ACSL3;SIPA1L3;SLC25A37;LRRTM1;FAM110B;FAM20C;TLN2;GABRD;AVPI1;PTPN3
lateral part of JcP	15/301	0.133832	0.739636	0	0	1.40271	2.82109	ZBTB17;PLK5;RCC2;DCAKD;LAPTM5;SEMA3F;SIPA1L3;TIAL1;VTN;RPL18A;GJB6;SREK1;MCM6;PPFIA2;CDH19
lateral part of alar p2	15/301	0.133832	0.739636	0	0	1.40271	2.82109	MRPS28;LRRN2;KCNC2;DCAKD;ACSL3;SLC25A37;BLOC1S1;LRRTM1;FAM110B;FAM20C;NEK1;TLN2;GABRD;AVPI1;PTPN3
lateral septal nucleus, dorsal part	15/301	0.133832	0.739636	0	0	1.40271	2.82109	NECAB2;SREBF1;EGR4;SLC32A1;GPR6;TRHDE;PPM1E;SLC8A1;ADRA2A;ADCY5;FAM102A;PNOC;LRRFIP1;PLTP;MET
lateral septal nucleus, intermedio-dorsal part	15/301	0.133832	0.739636	0	0	1.40271	2.82109	SLC32A1;FOS;GPR6;TRHDE;SLC8A1;ADCY5;ADORA2A;PENK;PNOC;GUF1;MFGE8;DRD2;NGEF;SSBP4;ITM2C
layer 2 of VPrP cortex	15/301	0.133832	0.739636	0	0	1.40271	2.82109	FIS1;SELPLG;EGLN2;EGR4;ARPP21;RGS14;LIME1;TMEM143;FRZB;ARHGDIA;PITPNM2;NMT2;CKB;YPEL5;TOMM6
layer 5 of FCx	15/301	0.133832	0.739636	0	0	1.40271	2.82109	EGR4;WWC1;NDUFA2;NDUFC2;SLC30A10;GNL1;HDDC3;PSMB6;FRZB;PPME1;SMPD1;MYO18A;MAP3K10;RXRG;UBXN6
layer 5 of PCx	15/301	0.133832	0.739636	0	0	1.40271	2.82109	TIMM8B;LRP1;PIK3R1;GNL1;PLCXD2;HDDC3;RGS4;PPME1;VPS72;TMEM215;PITPNM2;DNAJC21;TNRC18;STUB1;APBB1
lower dorsal perifornical nucleus	15/301	0.133832	0.739636	0	0	1.40271	2.82109	GABRQ;WSB1;KCNIP1;RASGRF2;ADRA2A;RPS15;TPPP3;PCSK1N;AP2S1;ERP29;NDN;TMBIM6;RPS21;AAMP;VAT1L
m1 part of paranigral nucleus	15/301	0.133832	0.739636	0	0	1.40271	2.82109	CREBZF;NTRK1;VPS18;CADPS2;COL11A1;LPL;USE1;GLS;CLDN5;KRTCAP2;PNOC;DNER;VIM;DRD2;FCGR2B
mantle zone of DTTh	15/301	0.133832	0.739636	0	0	1.40271	2.82109	MRPS28;LRRN2;KCNC2;DCAKD;ACSL3;SLC25A37;BLOC1S1;LRRTM1;FAM110B;FAM20C;NEK1;TLN2;GABRD;AVPI1;PTPN3
mantle zone of ITTh	15/301	0.133832	0.739636	0	0	1.40271	2.82109	MRPS28;CAMK2D;PLK5;KCNC2;DCAKD;ACSL3;SIPA1L3;SLC25A37;LRRTM1;FAM110B;FAM20C;TLN2;GABRD;AVPI1;PTPN3
mantle zone of JcPL	15/301	0.133832	0.739636	0	0	1.40271	2.82109	ZBTB17;PLK5;RCC2;DCAKD;LAPTM5;SEMA3F;SIPA1L3;TIAL1;VTN;RPL18A;GJB6;SREK1;MCM6;PPFIA2;CDH19
mantle zone of LPrP	15/301	0.133832	0.739636	0	0	1.40271	2.82109	SELPLG;EGR4;RGS14;COX17;ISLR2;LIME1;PPP1CA;PRPF39;LRFN4;GNG2;KCTD10;FRZB;ARHGDIA;NMT2;DLGAP3
mantle zone of PHyB-D	15/301	0.133832	0.739636	0	0	1.40271	2.82109	GABRQ;WSB1;NME3;ESR1;ADRA2A;RPS15;RPS26;PCSK1N;ERP29;NDN;TMBIM6;RPS21;PFDN5;AAMP;VAT1L
mantle zone of PHyB-P	15/301	0.133832	0.739636	0	0	1.40271	2.82109	GABRQ;CREBZF;COL11A1;ABHD8;USE1;SCAMP4;TMEM145;PCSK1N;GNB2;DNER;ERP29;VWA1;TKT;TAC1;PFDN5
medial amygdala, anterodorsal part	15/301	0.133832	0.739636	0	0	1.40271	2.82109	NECAB2;CAMK2D;EGLN2;NR2F1;UNC5D;LIME1;ESR1;RPS19;TMEM215;PENK;PNOC;DNER;RPL14;MET;TOMM6
medial amygdala, posterodorsal part	15/301	0.133832	0.739636	0	0	1.40271	2.82109	NECAB2;EGLN2;NR2F1;NME3;UNC5D;LIME1;ESR1;EFNB1;TMEM215;PNOC;DNER;MET;AAMP;C2CD2L;TOMM6
p1 portion of the paranigral nucleus	15/301	0.133832	0.739636	0	0	1.40271	2.82109	CREBZF;NTRK1;VPS18;CADPS2;COL11A1;DCTN3;LPL;USE1;GLS;CLDN5;KRTCAP2;DNER;VIM;DRD2;FCGR2B
pallidal part of olfactory tuberculum	15/301	0.133832	0.739636	0	0	1.40271	2.82109	TESC;KCNA5;SERPINA9;PDYN;GPR6;ADCY5;BCR;INF2;ADORA2A;GNG7;PITPNM2;DRD2;TAC1;ARGLU1;GABRD
parvicellular (lateral) subparafascicular nucleus	15/301	0.133832	0.739636	0	0	1.40271	2.82109	MRPS28;ALDH1L1;KCNC2;THOC1;ACSL3;SEMA3F;PLCXD2;SLC25A37;ZFP14;LRRTM1;FAM110B;SLC17A6;GABRD;RXRG;PTPN3
peduncular nucleus of the stria medullaris	15/301	0.133832	0.739636	0	0	1.40271	2.82109	GABRQ;CAMK2D;WSB1;GPX1;SLC32A1;PCDHGC3;UNC5D;ESR1;EEF1B2;GAP43;TMEM215;PNOC;RPS2;RPS21;SSBP4
perimammillary part of PHyB	15/301	0.133832	0.739636	0	0	1.40271	2.82109	GABRQ;CREBZF;COL11A1;ABHD8;USE1;SCAMP4;TMEM145;PCSK1N;GNB2;DNER;ERP29;VWA1;TKT;TAC1;PFDN5
periventricular stratum of AStr	15/301	0.133832	0.739636	0	0	1.40271	2.82109	SELPLG;GLT8D1;PDYN;CLU;ADCY5;TRAIP;EFNB1;TCEAL5;ADORA2A;PENK;PPP1R1B;CWC22;BANF1;DRD2;JUNB
periventricular stratum of p1Lim	15/301	0.133832	0.739636	0	0	1.40271	2.82109	CREBZF;NDUFB8;LRRC24;NDUFA6;NDUFB5;COL11A1;COX4I1;ESRRG;ATP5G3;CLU;ZFP14;PNOC;SLC17A6;NEFH;SCN1A
posterior (ventral) nucleus	15/301	0.133832	0.739636	0	0	1.40271	2.82109	MRPS28;HDAC5;KCNC2;DCAKD;PCDHGC3;ACSL3;PPP1R9B;SLC25A37;LRRTM1;FAM110B;FAM20C;TLN2;GABRD;AVPI1;PTPN3
precommissural pretectal domain	15/301	0.133832	0.739636	0	0	1.40271	2.82109	PLK5;KCNC2;RCC2;DCAKD;PCDHGC3;LAPTM5;SEMA3F;SIPA1L3;LRRTM1;FAM110B;SREK1;MCM6;GABRD;CDH19;PTPN3
prethalamic (p3) zona limitans domain	15/301	0.133832	0.739636	0	0	1.40271	2.82109	GPX1;KCNC2;NR2F1;ACSL3;SIPA1L3;FRZB;FAM163A;LRRTM1;PNOC;FAM20C;NEK1;TLN2;GABRD;AVPI1;PTPN3
r3 basal plate	15/301	0.133832	0.739636	0	0	1.40271	2.82109	RTN2;CREBZF;OSBPL6;ESRRG;AARSD1;RND2;FSTL1;HAPLN4;GLS;GRHPR;PDLIM2;VSNL1;DDT;FAM163A;TMCC2
reticular formation of JcPL	15/301	0.133832	0.739636	0	0	1.40271	2.82109	ZBTB17;RCC2;DCAKD;LAPTM5;SEMA3F;SIPA1L3;TIAL1;VTN;RPL18A;GJB6;SREK1;MCM6;SBF1;PPFIA2;CDH19
shell of p3ZL	15/301	0.133832	0.739636	0	0	1.40271	2.82109	GABRQ;WSB1;KCNC2;RPS8;LAPTM5;ABHD8;ATP11B;CLU;CLDN5;GAP43;ERP29;TLN2;TKT;PFDN5;NKTR
sublayer 6a of FCx	15/301	0.133832	0.739636	0	0	1.40271	2.82109	ALAS2;EGR4;LRP1;WWC1;NDUFC2;PIK3R1;GNL1;HDDC3;PPP1CA;PSMB6;PPME1;SMPD1;PSME4;CAMK2G;UBXN6
sublayer 6a of InsCx	15/301	0.133832	0.739636	0	0	1.40271	2.82109	NPDC1;NDUFC2;ACTN4;PIK3R1;HDDC3;PPP1CA;PSMB6;INF2;PPME1;VPS72;FASN;SMPD1;PSME4;CHMP1A;UBXN6
sublayer 6b of OCx	15/301	0.133832	0.739636	0	0	1.40271	2.82109	ZBTB17;NDUFB7;CLSTN2;SPHK2;NDUFC2;ARPC4;FOS;FBXL16;GNL1;TRHDE;SLC8A1;ADAMTS4;NR4A3;ZMIZ2;RXRG
superficial stratum of Pal	15/301	0.133832	0.739636	0	0	1.40271	2.82109	TESC;KCNA5;SERPINA9;PDYN;GPR6;ADCY5;BCR;INF2;ADORA2A;GNG7;PITPNM2;DRD2;TAC1;ARGLU1;GABRD
superficial stratum of PrS (cortical plate/marginal zone)	15/301	0.133832	0.739636	0	0	1.40271	2.82109	EPHA5;HDAC5;RBM14;CLSTN2;TMEM200A;NPY1R;PTPRK;TRHDE;SLC8A1;EFNB1;TCEAL5;MCM6;SBF1;PSPH;MAPK3
superficial stratum of S	15/301	0.133832	0.739636	0	0	1.40271	2.82109	RBM14;OSBPL6;RGS14;TMEM200A;DDX54;SRP14;SIPA1L3;SLC8A1;TRAIP;GNG10;GRIN2A;PRPF39;TCEAL5;NDST3;RAMP1
Thalamus	16/334	0.157637	0.868995	0	0	1.34529	2.48537	MRPS28;GPX1;LRRN2;KCNC2;DCAKD;ACSL3;SLC25A37;BLOC1S1;LRRTM1;FAM110B;FAM20C;NEK1;TLN2;GABRD;AVPI1;PTPN3
Field CA3, stratum lacunosum-moleculare	20/432	0.158294	0.870419	0	0	1.29884	2.39414	IPO13;CLSTN2;RGS14;LRRN2;DCAKD;LAPTM5;ISLR2;LPL;ARPC4;CLU;SIPA1L3;TRHDE;GLS;MRPL11;TRAIP;PPP1R9B;GRIN2A;NR4A3;SRSF6;PPFIA2
Field CA1, stratum oriens	16/343	0.183011	0.925087	0	0	1.30764	2.22065	RAB5C;RGS14;TMEM200A;SLC35C2;LPL;SIPA1L3;CLU;SLC8A1;TRAIP;MRPL53;GNG10;GRIN2A;PRPF39;NR4A3;NDST3;RAMP1
superficial stratum of DG	26/601	0.202156	0.925087	0	0	1.20968	1.93393	IPO13;CLSTN2;CRTC1;STMN3;KCNA5;SIPA1L3;GRIN2A;GNG10;TMEM65;MGAT1;RPS10;PPFIA2;MAPK3;NTRK1;LAMB2;ISLR2;NME3;NR2F2;NCOR2;ADORA2A;PITPNM2;VWA1;ASPHD2;SREK1;MCM6;PABPC1
Anterior group of the dorsal thalamus	14/301	0.205528	0.925087	0	0	1.30273	2.06115	MRPS28;GPX1;KCNC2;LPL;CLU;TRHDE;WDR54;NR4A3;BLOC1S1;TLN2;GABRD;PLTP;AVPI1;PTPN3
Anterior hypothalamic nucleus, posterior part	14/301	0.205528	0.925087	0	0	1.30273	2.06115	GABRQ;IGSF8;WSB1;ABHD8;ESR1;ADRA2A;TIAL1;TMEM145;PCSK1N;PITPNM1;ERP29;NDN;LGALS8;VAT1L
Anterior olfactory nucleus, posteroventral part	14/301	0.205528	0.925087	0	0	1.30273	2.06115	IPO13;FIS1;PHF2;EGLN2;YBX1;C1QTNF4;PAN3;GNG7;DNER;NHP2;NMT2;MAP3K10;DRD2;GRIA3
Anteromedial nucleus, ventral part	14/301	0.205528	0.925087	0	0	1.30273	2.06115	MRPS28;CAMK2D;GPX1;EGR4;KCNC2;STARD10;PCDHGC3;UNC5D;PPP1R9B;TMEM215;LRRTM1;TLN2;AVPI1;PTPN3
Central medial nucleus of the thalamus	14/301	0.205528	0.925087	0	0	1.30273	2.06115	MRPS28;CAMK2D;EGR4;KCNC2;NRXN1;STARD10;SLC25A37;BLOC1S1;FAM20C;TLN2;STX3;FCGR2B;AVPI1;PTPN3
Cortical amygdalar area	14/301	0.205528	0.925087	0	0	1.30273	2.06115	CAMK2D;NR2F1;UNC5D;PRKCZ;LIME1;ESR1;ADCY5;DMWD;GNG7;NMT2;PKIG;RXRG;MET;BCL9L
Cortical amygdalar area, posterior part, medial zone	14/301	0.205528	0.925087	0	0	1.30273	2.06115	IPO13;CAMK2D;EGLN2;RGS14;NR2F1;UNC5D;PRKCZ;ESR1;DMWD;GNG7;PKIG;RXRG;MET;MAPK3
Dorsomedial nucleus of the hypothalamus	14/301	0.205528	0.925087	0	0	1.30273	2.06115	GABRQ;WSB1;ABHD8;ESR1;ADRA2A;KRTCAP2;PCSK1N;RPS19;PITPNM1;GNB2;ERP29;VIM;LGALS8;PFDN5
Field CA1, pyramidal layer	14/301	0.205528	0.925087	0	0	1.30273	2.06115	OSBPL6;RGS14;LPL;SIPA1L3;SLC8A1;MRPL11;TRAIP;MRPL53;GNG10;GRIN2A;PRPF39;NR4A3;NDST3;RAMP1
Infralimbic area, layer 6a	14/301	0.205528	0.925087	0	0	1.30273	2.06115	GTF3C1;CCDC124;TET2;NDUFC2;PIK3R1;FMN2;TMEM196;SYN1;PSMB6;PPME1;SMPD1;ARHGDIA;NHP2;RXRG
Interanteromedial nucleus of the thalamus	14/301	0.205528	0.925087	0	0	1.30273	2.06115	MRPS28;CAMK2D;KCNC2;NRXN1;STARD10;GABRA3;PPP1R16A;LAPTM5;ACSL3;GRM4;BLOC1S1;TLN2;AVPI1;PTPN3
Lateral septal nucleus, ventral part	14/301	0.205528	0.925087	0	0	1.30273	2.06115	GABRQ;NTRK1;SLC32A1;UNC5D;TRHDE;SLC8A1;TIAL1;FAM102A;PNOC;ID3;RPS2;PTPN5;SSBP4;ITM2C
Magnocellular nucleus	14/301	0.205528	0.925087	0	0	1.30273	2.06115	NTRK1;FIS1;EGLN2;LAMB2;STMN3;NME3;NR2F2;PGD;PAN3;RPL18A;TMEM65;ADORA2A;BLOC1S1;VWA1
Medial amygdalar nucleus	14/301	0.205528	0.925087	0	0	1.30273	2.06115	NECAB2;CAMK2D;EGLN2;NR2F1;NME3;UNC5D;LIME1;ESR1;ADCY5;DPM3;TMEM215;CD38;MET;TOMM6
Medial amygdalar nucleus, posterodorsal part	14/301	0.205528	0.925087	0	0	1.30273	2.06115	NECAB2;EGLN2;NR2F1;LPL;UNC5D;LIME1;ESR1;TMEM215;PNOC;DNER;CD38;MET;C2CD2L;TOMM6
Medial amygdalar nucleus, posterodorsal part, sublayer c	14/301	0.205528	0.925087	0	0	1.30273	2.06115	NECAB2;EGLN2;NR2F1;LPL;LIME1;ESR1;PRRC2A;EFNB1;TMEM215;PNOC;DNER;CD38;MFGE8;MET
Medial geniculate complex	14/301	0.205528	0.925087	0	0	1.30273	2.06115	MRPS28;VPS18;EGR4;KCNC2;DCAKD;THOC1;SIPA1L3;RPL18A;LRRTM1;FAM20C;GABRD;AVPI1;TOMM6;PTPN3
Mediodorsal nucleus of the thalamus, medial part	14/301	0.205528	0.925087	0	0	1.30273	2.06115	NECAB2;MRPS28;CAMK2D;EGR4;KCNC2;ACSL3;GRM4;LRRTM1;FAM20C;TLN2;FCGR2B;GABRD;AVPI1;PTPN3
Midbrain raphe nuclei	14/301	0.205528	0.925087	0	0	1.30273	2.06115	CREBZF;NTRK1;VPS18;COL11A1;STARD10;ETFB;USE1;GLS;VTN;KRTCAP2;PDLIM2;PNOC;VIM;FCGR2B
Nucleus of reunions	14/301	0.205528	0.925087	0	0	1.30273	2.06115	MRPS28;CAMK2D;WSB1;KCNC2;NRXN1;LAPTM5;ABHD8;ATP11B;CLDN5;GAP43;TLN2;FCGR2B;AVPI1;PTPN3
Periventricular region	14/301	0.205528	0.925087	0	0	1.30273	2.06115	GABRQ;WSB1;STXBP2;NR2F2;ESR1;PCSK1N;PITPNM1;GNB2;PNOC;ERP29;NDN;RPS21;VAT1L;SSBP4
Pons, motor related	14/301	0.205528	0.925087	0	0	1.30273	2.06115	RTN2;CREBZF;NDUFB5;ESRRG;RND2;S100B;FSTL1;SGPP2;GLS;GRHPR;PDLIM2;DNPEP;DDT;TMCC2
Posterolateral visual area, layer 5	14/301	0.205528	0.925087	0	0	1.30273	2.06115	TIMM8B;EGR2;NPY1R;FOS;HDDC3;RBM15B;VPS72;SMPD1;CHMP1A;DNAJC21;STUB1;APBB1;MET;MAP3K11
Posterolateral visual area, layer 6a	14/301	0.205528	0.925087	0	0	1.30273	2.06115	EPHA5;TIMM8B;CLSTN2;NCAPH2;FOS;HDDC3;VPS72;ZMIZ2;CHMP1A;STUB1;APBB1;JUNB;MET;MAP3K11
Postpiriform transition area, layers 3	14/301	0.205528	0.925087	0	0	1.30273	2.06115	IPO13;TTC14;EGLN2;OSBPL6;RGS14;EDF1;PTPRK;PRKCZ;LIME1;PPP1R9B;PRPF39;KCTD10;DMWD;MAPK3
Postsubiculum, layer 3	14/301	0.205528	0.925087	0	0	1.30273	2.06115	CSF1R;CLSTN2;TMEM200A;NR2F1;FOS;FBXL16;TRHDE;SLC8A1;ADAMTS4;EFR3A;NDST3;ID3;SERPINI1;RXRG
Primary somatosensory area, mouth, layer 6a	14/301	0.205528	0.925087	0	0	1.30273	2.06115	ALAS2;CLSTN2;NDUFC2;TMEM196;GNL1;HDDC3;PSMB6;VPS72;CHMP1A;STUB1;APBB1;RXRG;CAMK2G;UBXN6
Primary somatosensory area, nose	14/301	0.205528	0.925087	0	0	1.30273	2.06115	MRPS28;TIMM8B;SELPLG;NDUFC2;ACTN4;PLCXD2;HDDC3;PPP1R9B;VPS72;CWC22;MAP3K10;BANF1;STUB1;APBB1
Primary somatosensory area, trunk, layer 6a	14/301	0.205528	0.925087	0	0	1.30273	2.06115	TTC14;CLSTN2;LRP1;PIK3R1;GNL1;HDDC3;PPP1CA;INF2;PPME1;ZMIZ2;SMPD1;PSME4;CAMK2G;UBXN6
Primary somatosensory area, unassigned, layer 6a	14/301	0.205528	0.925087	0	0	1.30273	2.06115	ALAS2;WWC1;NDUFC2;GNL1;HDDC3;PPP1CA;PSMB6;BLOC1S1;PPME1;VPS72;SMPD1;PSME4;CAMK2G;UBXN6
Primary visual area, layer 6a	14/301	0.205528	0.925087	0	0	1.30273	2.06115	TIMM8B;CLSTN2;FOS;FBXL16;GNL1;HDDC3;ADAMTS4;NR4A3;VPS72;ZMIZ2;SMPD1;CHMP1A;APBB1;MAP3K11
Reticular nucleus of the thalamus	14/301	0.205528	0.925087	0	0	1.30273	2.06115	GSN;GPX1;KCNIP1;NR2F1;ESRRG;ACSL3;CLU;WDR54;FAM163A;LRRTM1;FAM20C;TLN2;GABRD;PVALB
Retrosplenial area, lateral agranular part, layer 2/3	14/301	0.205528	0.925087	0	0	1.30273	2.06115	EGR2;NPY1R;CELSR1;LMF1;PER3;SMPD1;NDST3;PIN1;TNRC18;APBB1;JUNB;SF3B1;MET;CDH19
Ventral anterior-lateral complex of the thalamus	14/301	0.205528	0.925087	0	0	1.30273	2.06115	MRPS28;KCNC2;NR2F1;ACSL3;SLC25A37;FAM163A;LRRTM1;FAM110B;FAM20C;ITGB1BP1;TLN2;GABRD;AVPI1;PTPN3
Ventromedial hypothalamic nucleus, anterior part	14/301	0.205528	0.925087	0	0	1.30273	2.06115	KCNIP1;SLC38A10;KCNA5;ESR1;TRAIP;KRTCAP2;PCSK1N;TUBA1A;PITPNM1;GNB2;ERP29;NDN;ITGB1BP1;LGALS8
amygdalo-striatal transition	14/301	0.205528	0.925087	0	0	1.30273	2.06115	SELPLG;GLT8D1;PDYN;ADCY5;TRAIP;EFNB1;TCEAL5;ADORA2A;PENK;PPP1R1B;CWC22;BANF1;DRD2;JUNB
basolateral amygdaloid nucleus, posterior part	14/301	0.205528	0.925087	0	0	1.30273	2.06115	IPO13;NECAB2;SELPLG;NR2F1;GLT8D1;LPL;PTPRK;SRP14;RBM15B;PRPF39;TCEAL5;RXRG;PLTP;MAPK3
cingulate cortex	14/301	0.205528	0.925087	0	0	1.30273	2.06115	NDUFB9;ALAS2;TMEM200A;CCDC124;NDUFA2;TESK1;NDUFC2;SLC8A1;PPME1;SMPD1;NDST3;PSME4;SERPINI1;RXRG
dorsal part of m2A	14/301	0.205528	0.925087	0	0	1.30273	2.06115	DDR1;SREBF1;PLK5;COL11A1;NR2F2;SEMA3F;CLU;DUSP11;SCAMP4;TUBA1A;ZMYM6;APOE;VIM;CCNL1
granule cell layer of the DG	14/301	0.205528	0.925087	0	0	1.30273	2.06115	IPO13;CLSTN2;RPLP0;ISLR2;SIPA1L3;NCOR2;PITPNM2;ASPHD2;PABPC1;FAU;MCM6;RPS10;PPFIA2;MAPK3
interanterodorsal nucleus	14/301	0.205528	0.925087	0	0	1.30273	2.06115	MRPS28;NTRK1;GPX1;KCNC2;STARD10;ACSL3;TRAIP;GRM4;BLOC1S1;FAM20C;TLN2;STX3;AVPI1;PTPN3
intermediate stratum of PHyB-P	14/301	0.205528	0.925087	0	0	1.30273	2.06115	GABRQ;CREBZF;CLSTN2;COL11A1;ABHD8;SCAMP4;TMEM145;PCSK1N;GNB2;DNER;ERP29;RPL37;PFDN5;NKTR
intermediate stratum of TPaA	14/301	0.205528	0.925087	0	0	1.30273	2.06115	GABRQ;GPX1;PCDHGC3;RPL8;ESR1;RPS15;EEF1B2;PCSK1N;PNOC;ERP29;NDN;RPS21;MAP3K11;SSBP4
intermediate stratum of p2ZL	14/301	0.205528	0.925087	0	0	1.30273	2.06115	GPX1;KCNC2;NR2F1;ACSL3;SLC25A37;PRDX5;LRRTM1;FAM110B;FAM20C;TLN2;QRFPR;GABRD;AVPI1;PTPN3
intermediate stratum of p3B	14/301	0.205528	0.925087	0	0	1.30273	2.06115	GABRQ;CREBZF;ALDH1L1;LRRC24;RPS8;COL11A1;SEMA3F;CLU;USE1;DNPEP;TMBIM6;DRD2;RPS21;PLEC
intermediate stratum of r3BM	14/301	0.205528	0.925087	0	0	1.30273	2.06115	RTN2;CREBZF;NDUFA6;ABHD8;ESRRG;SLC4A3;RND2;FSTL1;GLS;VSNL1;DDT;FAM163A;TMCC2;NEFH
interstitial nucleus of the zona limitans	14/301	0.205528	0.925087	0	0	1.30273	2.06115	GPX1;KCNC2;NR2F1;ACSL3;SLC25A37;PRDX5;LRRTM1;FAM110B;FAM20C;TLN2;QRFPR;GABRD;AVPI1;PTPN3
isthmic portion of paranigral nucleus	14/301	0.205528	0.925087	0	0	1.30273	2.06115	CREBZF;NTRK1;CADPS2;ATP6V1G1;COL11A1;LPL;USE1;GLS;CLDN5;TUBA1A;FAM163A;PNOC;DNER;DRD2
lateral preoptic area, PO1 part	14/301	0.205528	0.925087	0	0	1.30273	2.06115	GABRQ;NTRK1;SLC32A1;KCNIP1;STMN3;NME3;NR2F2;ESR1;RPS15;PNOC;ERP29;NDN;MGAT1;RPS21
lateral terminal nucleus of the accessory optic tract, lateral part	14/301	0.205528	0.925087	0	0	1.30273	2.06115	VPS18;ZBTB17;LAPTM5;SEMA3F;SIPA1L3;VTN;RPL18A;GJB6;SREK1;MCM6;P4HB;SBF1;RAMP1;CDH19
lateropallial prepiriform area	14/301	0.205528	0.925087	0	0	1.30273	2.06115	SELPLG;EGR4;RGS14;COX17;ISLR2;LIME1;PPP1CA;PRPF39;LRFN4;GNG2;KCTD10;FRZB;NMT2;DLGAP3
layer 1 of VPrP cortex	14/301	0.205528	0.925087	0	0	1.30273	2.06115	FIS1;PLK5;EGR4;RGS14;LIME1;FRZB;NMT2;MAP3K10;SERPINI1;GNB5;DLGAP3;YPEL5;BCL9L;MCM2
layer 3 of LOT	14/301	0.205528	0.925087	0	0	1.30273	2.06115	CAMK2D;EGLN2;STMN3;NME3;SLC38A10;LIME1;HDDC3;TMEM143;KRTCAP2;DPM3;TMEM65;PKIG;TOMM6;BCL9L
layer 4 of PCx	14/301	0.205528	0.925087	0	0	1.30273	2.06115	PPP1R37;DPP10;RASGRF2;HDDC3;RGS4;EFNB1;BLOC1S1;TMEM215;PITPNM2;DNAJC21;MYO18A;TNRC18;STUB1;DLGAP3
layer 5 of InsCx	14/301	0.205528	0.925087	0	0	1.30273	2.06115	TIMM8B;SELPLG;EGR4;NDUFC2;ACTN4;PIK3R1;PSMA7;PPP1CA;GNG2;VPS72;SMPD1;CHMP1A;CWC22;STUB1
m1B part of the periaqueductal gray	14/301	0.205528	0.925087	0	0	1.30273	2.06115	VPS18;LRRC24;NCAPH2;COX4I1;STARD10;PPP1R16A;ETFB;USE1;MRPL54;PPIP5K2;PSMB1;TMEM126A;STX3;FAU
mantle zone of AStr	14/301	0.205528	0.925087	0	0	1.30273	2.06115	SELPLG;GLT8D1;PDYN;ADCY5;TRAIP;EFNB1;TCEAL5;ADORA2A;PENK;CWC22;MFGE8;DRD2;JUNB;PSPH
mantle zone of m1AL	14/301	0.205528	0.925087	0	0	1.30273	2.06115	ALDH1L1;METRN;SLC35C2;COL11A1;NR2F2;SEMA3F;RND2;VTN;SAMM50;VAMP1;SLC17A6;QRFPR;RXRG;CDH19
mantle zone of m2AD	14/301	0.205528	0.925087	0	0	1.30273	2.06115	DDR1;SREBF1;PLK5;COL11A1;NR2F2;SEMA3F;CLU;DUSP11;SCAMP4;TUBA1A;ZMYM6;APOE;VIM;CCNL1
mantle zone of p3ZL	14/301	0.205528	0.925087	0	0	1.30273	2.06115	GPX1;KCNC2;NR2F1;ACSL3;SIPA1L3;CLU;FAM163A;LRRTM1;FAM20C;NEK1;TLN2;GABRD;AVPI1;PTPN3
mantle zone of r4BM	14/301	0.205528	0.925087	0	0	1.30273	2.06115	RTN2;CREBZF;OSBPL6;SLC35C2;IQSEC3;ESRRG;AGAP3;SLC30A10;GLS;EFNB1;KRTCAP2;PDLIM2;TMCC2;MCM2
medial amygdala, posteroventral part	14/301	0.205528	0.925087	0	0	1.30273	2.06115	CAMK2D;EGLN2;LAPTM5;NME3;UNC5D;LIME1;ESR1;ADCY5;TMEM215;GNG7;POLD2;PKIG;MET;BCL9L
medial geniculate nucleus	14/301	0.205528	0.925087	0	0	1.30273	2.06115	MRPS28;VPS18;EGR4;KCNC2;DCAKD;SIPA1L3;CLK4;VTN;RPL18A;PABPC1;GABRD;AVPI1;TOMM6;PTPN3
medial part of r2B	14/301	0.205528	0.925087	0	0	1.30273	2.06115	CREBZF;NTRK1;NDUFB5;SLC35C2;STARD10;KCNJ16;RND2;FSTL1;GLS;KRTCAP2;PDLIM2;VSNL1;DDT;FAM163A
molecular layer of S	14/301	0.205528	0.925087	0	0	1.30273	2.06115	OSBPL6;RGS14;TMEM200A;DDX54;SIPA1L3;TRAIP;GNG10;GRIN2A;TCEAL5;NDST3;ID3;MCM6;RAMP1;PPFIA2
neural plate	14/301	0.205528	0.925087	0	0	1.30273	2.06115	KCNJ4;LPL;ICAM5;SERPINA9;GPR6;TMEM198;GRIN2A;ADORA2A;FRZB;NDST3;DLGAP3;DRD2;CRYM;GABRD
p1Lim part of periaqueductal gray	14/301	0.205528	0.925087	0	0	1.30273	2.06115	CREBZF;NDUFB8;LRRC24;NDUFA6;NDUFB5;COL11A1;COX4I1;ESRRG;ATP5G3;ZFP14;PNOC;SLC17A6;NEFH;SCN1A
p2 part of the zona limitans core population	14/301	0.205528	0.925087	0	0	1.30273	2.06115	GPX1;KCNC2;SLC35C2;ACSL3;SLC25A37;LRRTM1;FAM110B;FAM20C;ITGB1BP1;TLN2;QRFPR;GABRD;AVPI1;PTPN3
p3 portion of paranigral nucleus	14/301	0.205528	0.925087	0	0	1.30273	2.06115	CREBZF;NTRK1;COL11A1;CLU;GLS;CLDN5;VTN;KRTCAP2;DNER;VWA1;VIM;TKT;FCGR2B;PLTP
pallidal islands of Calleja	14/301	0.205528	0.925087	0	0	1.30273	2.06115	KCNA5;SERPINA9;PDYN;GPR6;ADCY5;BCR;INF2;ADORA2A;GNG7;DRD2;TAC1;ARGLU1;GABRD;BCL9L
periventricular part of StrSe	14/301	0.205528	0.925087	0	0	1.30273	2.06115	NECAB2;SREBF1;EGR4;SLC32A1;TRHDE;SLC8A1;ADRA2A;ADCY5;FAM102A;PNOC;LRRFIP1;VIM;PLTP;MET
periventricular stratum of m1B	14/301	0.205528	0.925087	0	0	1.30273	2.06115	VPS18;LRRC24;NCAPH2;COX4I1;STARD10;PPP1R16A;ETFB;USE1;MRPL54;PPIP5K2;PSMB1;TMEM126A;STX3;FAU
periventricular stratum of p3ZL	14/301	0.205528	0.925087	0	0	1.30273	2.06115	GABRQ;WSB1;KCNC2;RPS8;LAPTM5;ABHD8;ATP11B;CLDN5;GAP43;ERP29;TLN2;TKT;PFDN5;NKTR
posterior part of anterior hypothalamic nucleus	14/301	0.205528	0.925087	0	0	1.30273	2.06115	GABRQ;IGSF8;WSB1;RPS8;ESR1;ADRA2A;TIAL1;PCSK1N;GAP43;PITPNM1;ERP29;NDN;PFDN5;VAT1L
posteromedial visual area, layer 6b	14/301	0.205528	0.925087	0	0	1.30273	2.06115	CLSTN2;CHUK;SPHK2;PIK3R1;FOS;FBXL16;TRHDE;SLC8A1;MRPL11;ADAMTS4;NR4A3;GNB2;PPIB;RXRG
prosomere 2	14/301	0.205528	0.925087	0	0	1.30273	2.06115	MRPS28;KCNC2;DCAKD;ACSL3;SLC25A37;BLOC1S1;LRRTM1;FAM110B;FAM20C;NEK1;TLN2;GABRD;AVPI1;PTPN3
r2 basal plate	14/301	0.205528	0.925087	0	0	1.30273	2.06115	RTN2;CREBZF;NTRK1;NDUFB5;KCNJ16;S100B;FSTL1;TUBB4A;GLS;GRHPR;KRTCAP2;DDT;FAM163A;VWA1
r2 part of prepontine raphe nucleus	14/301	0.205528	0.925087	0	0	1.30273	2.06115	NTRK1;VPS18;PPP1R16A;AGAP3;S100B;MRPL54;GLS;GRHPR;KRTCAP2;PDLIM2;VSNL1;FAM163A;SCAND1;YPEL5
retroreuniens nucleus	14/301	0.205528	0.925087	0	0	1.30273	2.06115	MRPS28;CAMK2D;WSB1;EGR4;KCNC2;NRXN1;PLCXD2;SLC25A37;PITPNM1;PNOC;SLC17A6;FCGR2B;AVPI1;PTPN3
striatal amygdala	14/301	0.205528	0.925087	0	0	1.30273	2.06115	SELPLG;GLT8D1;PDYN;ADCY5;TRAIP;EFNB1;TCEAL5;ADORA2A;PENK;CWC22;MFGE8;DRD2;JUNB;PSPH
subpretectal nucleus	14/301	0.205528	0.925087	0	0	1.30273	2.06115	ALDH1L1;COL11A1;TALDO1;ATP5G3;SEMA3F;KCNAB3;TUBB4A;CLU;HAPLN4;VAMP1;SLC17A6;QRFPR;RXRG;PVALB
superficial stratum of CoPL	14/301	0.205528	0.925087	0	0	1.30273	2.06115	VPS18;ZBTB17;LAPTM5;SEMA3F;SIPA1L3;VTN;RPL18A;GJB6;SREK1;MCM6;P4HB;SBF1;RAMP1;CDH19
superficial stratum of VTTh	14/301	0.205528	0.925087	0	0	1.30273	2.06115	MRPS28;VPS18;EGR4;KCNC2;DCAKD;SIPA1L3;CLK4;VTN;RPL18A;PABPC1;GABRD;AVPI1;TOMM6;PTPN3
thalamic (p2) zona limitans domain	14/301	0.205528	0.925087	0	0	1.30273	2.06115	GPX1;KCNC2;NR2F1;ACSL3;CLU;SLC25A37;LRRTM1;FAM20C;TLN2;QRFPR;GABRD;RXRG;AVPI1;PTPN3
ventral premammillary nucleus (migrated)	14/301	0.205528	0.925087	0	0	1.30273	2.06115	GABRQ;ARPC1B;PCDHGC3;KCNA5;AARSD1;ESR1;DPM3;PCSK1N;ALDH2;DMWD;POLD2;STX3;SLIT2;SSBP4
ventropallial amygdalopiriform area	14/301	0.205528	0.925087	0	0	1.30273	2.06115	CAMK2D;EGLN2;NR2F1;LPL;PRKCZ;LIME1;ESR1;PRPF39;TCEAL5;DMWD;PKIG;RXRG;TOMM6;MAPK3
Ventromedial hypothalamic nucleus	18/405	0.21926	0.984864	0	0	1.24259	1.88563	GABRQ;RASGRF2;PCDHGC3;NPY1R;KCNA5;AARSD1;PDYN;CLU;ESR1;TRAIP;DPM3;PCSK1N;FRZB;ARHGDIA;GNB2;ERP29;NDN;SSBP4
Dorsal premammillary nucleus	21/482	0.222629	0.997944	0	0	1.21738	1.82881	GABRQ;CREBZF;VPS18;ARPC1B;PCDHGC3;SLC38A10;AARSD1;ESR1;SOD1;TMEM145;KRTCAP2;PCSK1N;ALDH2;DMWD;GNB2;DNER;POLD2;RPL37;SLIT2;TAC1;PFDN5
Peripeduncular nucleus	22/532	0.29262	0.999992	0	0	1.15145	1.415	RBM39;CLSTN2;RGS14;CRTC1;DCAKD;THOC1;LPL;TMC7;ARPC4;UQCR11;AGAP3;SIPA1L3;MRPL11;TRAIP;VTN;NR4A3;RPL18A;FRZB;GJB6;ASPHD2;PABPC1;TOMM6
Agranular insular area, dorsal part, layer 6a	13/301	0.298473	0.999992	0	0	1.20372	1.4554	ISLR2;NDUFC2;SREBF2;PPP1CA;PSMB6;GNG2;KCTD10;FASN;CHMP1A;CWC22;STUB1;RXRG;UBXN6
Ansiform lobule	13/301	0.298473	0.999992	0	0	1.20372	1.4554	SPHK2;PCDHGC3;STMN2;GPR37L1;CELSR1;ARHGAP33;TMEM145;SNRK;GRM4;PITPNM1;VIM;ST3GAL2;APPL2
Anterior cingulate area, dorsal part, layer 6b	13/301	0.298473	0.999992	0	0	1.20372	1.4554	GTF3C1;NDUFB9;NDUFC2;PIK3R1;FMN2;SYN1;SREBF2;SLC8A1;PSMB6;AP2S1;NHP2;CAMK2G;UBXN6
Anterior cingulate area, ventral part, layer 5	13/301	0.298473	0.999992	0	0	1.20372	1.4554	NDUFB9;CCDC124;NDUFA2;NDUFC2;FMN2;WDR54;SREBF2;PSMB6;PPME1;SMPD1;PSME4;DNAJC21;UBXN6
Anterior hypothalamic nucleus, anterior part	13/301	0.298473	0.999992	0	0	1.20372	1.4554	GABRQ;PCDHGC3;STMN3;SLC38A10;CLU;ESR1;PCSK1N;ERP29;NDN;ITGB1BP1;RPS21;MAP3K11;SSBP4
Anteromedial nucleus, dorsal part	13/301	0.298473	0.999992	0	0	1.20372	1.4554	MRPS28;CAMK2D;GPX1;EGR4;KCNC2;STARD10;PCDHGC3;PPP1R9B;LRRTM1;TLN2;GABRD;AVPI1;PTPN3
Anteromedial visual area, layer 4	13/301	0.298473	0.999992	0	0	1.20372	1.4554	KCNH3;EGR2;NCOA5;FOS;WDR54;SYN1;RGS4;NR4A3;SMPD1;TNRC18;APBB1;PTPN5;CDH19
Anteromedial visual area, layer 5	13/301	0.298473	0.999992	0	0	1.20372	1.4554	KCNH3;EGR2;NCOA5;SLC35C2;FOS;HDDC3;PPME1;SMPD1;PITPNM2;TNRC18;APBB1;PTPN5;CDH19
Arcuate hypothalamic nucleus	13/301	0.298473	0.999992	0	0	1.20372	1.4554	SREBF1;LAMB2;ARPC1B;ESR1;ADCY5;DPM3;RPL18A;FRZB;ERP29;STX3;VIM;RPS10;SSBP4
Central lateral nucleus of the thalamus	13/301	0.298473	0.999992	0	0	1.20372	1.4554	MRPS28;GABRB2;KCNC2;PCDHGC3;ACSL3;SLC25A37;LRRTM1;FAM110B;FAM20C;TLN2;RXRG;AVPI1;PTPN3
Cerebellar cortex	13/301	0.298473	0.999992	0	0	1.20372	1.4554	METRN;PCDHGC3;GPR37L1;CELSR1;ARHGAP33;TMEM145;SNRK;GRM4;PITPNM1;ITGB1BP1;VIM;ST3GAL2;APPL2
Cortical amygdalar area, posterior part	13/301	0.298473	0.999992	0	0	1.20372	1.4554	CAMK2D;RGS14;NR2F1;LPL;UNC5D;PRKCZ;ESR1;DMWD;GNG7;NMT2;PKIG;RXRG;MET
Cortical amygdalar area, posterior part, lateral zone, layer 3	13/301	0.298473	0.999992	0	0	1.20372	1.4554	CAMK2D;NR2F1;GLT8D1;LPL;PRKCZ;LIME1;ESR1;DMWD;GNG7;PKIG;JUNB;MET;MAPK3
Crus 1, molecular layer	13/301	0.298473	0.999992	0	0	1.20372	1.4554	SPHK2;METRN;PCDHGC3;STMN2;CELSR1;ARHGAP33;TMEM145;SNRK;GRM4;PITPNM1;VIM;ST3GAL2;APPL2
Crus 2	13/301	0.298473	0.999992	0	0	1.20372	1.4554	SPHK2;PCDHGC3;STMN2;CELF4;GPR37L1;CELSR1;ARHGAP33;TMEM145;SNRK;GRM4;PITPNM1;ST3GAL2;APPL2
Crus 2, granular layer	13/301	0.298473	0.999992	0	0	1.20372	1.4554	SPHK2;PCDHGC3;STMN2;CELF4;GPR37L1;CELSR1;ARHGAP33;TMEM145;SNRK;GRM4;PITPNM1;ST3GAL2;APPL2
Dorsal peduncular area, layer 6a	13/301	0.298473	0.999992	0	0	1.20372	1.4554	DDR1;GTF3C1;FIS1;PHF2;STXBP2;RPLP0;TET2;NDUFC2;ARHGDIA;NDST3;NHP2;FCGR2B;RXRG
Hypothalamic lateral zone	13/301	0.298473	0.999992	0	0	1.20372	1.4554	GABRQ;ALDH1L1;ESR1;ADRA2A;RPS15;BLOC1S1;RESP18;PNOC;NDN;MGAT1;TMBIM6;RPS21;AAMP
Interanterodorsal nucleus of the thalamus	13/301	0.298473	0.999992	0	0	1.20372	1.4554	MRPS28;CAMK2D;GPX1;KCNC2;STARD10;PCDHGC3;TRAIP;LRRTM1;TLN2;GABRD;PLTP;AVPI1;PTPN3
Interbrain	13/301	0.298473	0.999992	0	0	1.20372	1.4554	MRPS28;GABRQ;GPX1;KCNC2;DCAKD;ESR1;LRRTM1;FAM20C;TLN2;RPS21;GABRD;AVPI1;PTPN3
Intralaminar nuclei of the dorsal thalamus	13/301	0.298473	0.999992	0	0	1.20372	1.4554	MRPS28;CAMK2D;KCNC2;ACSL3;SLC25A37;BLOC1S1;LRRTM1;FAM110B;FAM20C;TLN2;RXRG;AVPI1;PTPN3
Medial geniculate complex, ventral part	13/301	0.298473	0.999992	0	0	1.20372	1.4554	MRPS28;EGR4;KCNC2;DCAKD;SIPA1L3;CLK4;RPL18A;VPS72;PABPC1;GABRD;AVPI1;TOMM6;PTPN3
Medial preoptic nucleus, lateral part	13/301	0.298473	0.999992	0	0	1.20372	1.4554	GABRQ;SLC38A10;NR2F2;RPL8;ESR1;PCSK1N;PITPNM1;VGF;GNB2;ERP29;NDN;MAP3K11;SSBP4
Medial septal complex	13/301	0.298473	0.999992	0	0	1.20372	1.4554	NTRK1;SLC32A1;TMC7;ATP11B;NR2F2;SERPINA9;ETFB;ADCY5;TMEM65;ADORA2A;PENK;TAC1;SSBP4
Midbrain reticular nucleus	13/301	0.298473	0.999992	0	0	1.20372	1.4554	CREBZF;ALDH1L1;KCNG4;COL11A1;SEMA3F;TUBB4A;CLU;ZFP14;MAG;DNPEP;FGFR1OP;DRD2;RXRG
Nucleus of the lateral olfactory tract, layer 3	13/301	0.298473	0.999992	0	0	1.20372	1.4554	NECAB2;FIS1;CAMK2D;EGLN2;NR2F1;STMN3;NME3;LIME1;PSMA7;RPS19;PKIG;TOMM6;BCL9L
Periventricular hypothalamic nucleus, posterior part	13/301	0.298473	0.999992	0	0	1.20372	1.4554	GABRQ;KCNA5;ESR1;SCAMP4;DPM3;PCSK1N;FRZB;DMWD;POLD2;PLXNB2;SLIT2;VIM;SSBP4
Pons	13/301	0.298473	0.999992	0	0	1.20372	1.4554	RTN2;CREBZF;ESRRG;S100B;FSTL1;TUBB4A;SGPP2;GLS;GRHPR;PDLIM2;DNPEP;DDT;TMCC2
Pontine gray	13/301	0.298473	0.999992	0	0	1.20372	1.4554	RTN2;CREBZF;OSBPL6;ESRRG;AARSD1;SLC30A10;FSTL1;ADRA2A;GLS;KRTCAP2;PDLIM2;POLD2;TMCC2
Posterior parietal association areas, layer 5	13/301	0.298473	0.999992	0	0	1.20372	1.4554	EGR2;WWC1;FOS;GNL1;WDR54;SYN1;HDDC3;PRPF39;PPME1;SMPD1;TNRC18;APBB1;GIT1
Postpiriform transition area	13/301	0.298473	0.999992	0	0	1.20372	1.4554	IPO13;EGLN2;OSBPL6;RGS14;EDF1;PTPRK;PRKCZ;LIME1;PPP1R9B;PRPF39;DMWD;PPFIA2;MAPK3
Primary somatosensory area, barrel field, layer 4	13/301	0.298473	0.999992	0	0	1.20372	1.4554	TIMM8B;LRP1;HDDC3;RGS4;PRPF39;VPS72;TMEM215;DNAJC21;MYO18A;TNRC18;STUB1;DLGAP3;RXRG
Primary somatosensory area, barrel field, layer 5	13/301	0.298473	0.999992	0	0	1.20372	1.4554	MRPS28;TIMM8B;LRP1;PLCXD2;HDDC3;PRPF39;VPS72;TMEM215;HSF2;DNAJC21;STUB1;APBB1;RXRG
Primary somatosensory area, barrel field, layer 6a	13/301	0.298473	0.999992	0	0	1.20372	1.4554	TIMM8B;CLSTN2;LRP1;SPHK2;NDUFC2;PPP1R9B;VPS72;CHMP1A;BANF1;STUB1;APBB1;CAMK2G;UBXN6
Primary somatosensory area, lower limb, layer 6a	13/301	0.298473	0.999992	0	0	1.20372	1.4554	EGR4;CLSTN2;LRP1;WWC1;NDUFC2;PIK3R1;GNL1;TTBK1;HDDC3;SMPD1;PSME4;CAMK2G;UBXN6
Primary somatosensory area, unassigned, layer 2/3	13/301	0.298473	0.999992	0	0	1.20372	1.4554	PPP1R37;RAB5C;NME3;EFNB1;GNG10;RBM15B;BLOC1S1;DNAJC21;POLD2;TNRC18;TMCC2;DLGAP3;SLC25A46
Primary visual area, layer 6b	13/301	0.298473	0.999992	0	0	1.20372	1.4554	TIMM8B;ZBTB17;CLSTN2;FOS;FBXL16;TRHDE;SLC8A1;ADAMTS4;NR4A3;VPS72;ZMIZ2;FASN;RXRG
Retrosplenial area, dorsal part, layer 6b	13/301	0.298473	0.999992	0	0	1.20372	1.4554	TIMM8B;CLSTN2;WWC1;PPP1R16A;FOS;GNL1;SLC8A1;ADAMTS4;NR4A3;PPME1;SMPD1;APBB1;FGF12
Retrosplenial area, lateral agranular part, layer 5	13/301	0.298473	0.999992	0	0	1.20372	1.4554	EGR2;NCOA5;DOHH;LMF1;PER3;SMPD1;NDST3;TNRC18;APBB1;JUNB;SF3B1;PTPN5;CDH19
Simple lobule	13/301	0.298473	0.999992	0	0	1.20372	1.4554	RBM39;KCNIP1;SPHK2;METRN;PCDHGC3;ARHGAP33;TMEM145;SNRK;GRM4;PITPNM1;VIM;ST3GAL2;APPL2
Simple lobule, granular layer	13/301	0.298473	0.999992	0	0	1.20372	1.4554	RBM39;KCNIP1;SPHK2;METRN;PCDHGC3;ARHGAP33;TMEM145;SNRK;GRM4;PITPNM1;VIM;ST3GAL2;APPL2
Simple lobule, molecular layer	13/301	0.298473	0.999992	0	0	1.20372	1.4554	RBM39;KCNIP1;SPHK2;METRN;PCDHGC3;ARHGAP33;TMEM145;SNRK;GRM4;PITPNM1;VIM;ST3GAL2;APPL2
Superior colliculus, motor related, intermediate white layer	13/301	0.298473	0.999992	0	0	1.20372	1.4554	PLK5;SLC35C2;NR2F2;SEMA3F;KCNAB3;TMEM145;VTN;GJB6;VAMP1;STX3;TAC1;RAMP1;CDH19
Ventral posterolateral nucleus of the thalamus, parvicellular part	13/301	0.298473	0.999992	0	0	1.20372	1.4554	KCNC2;RCC2;ATP5G3;RAP1GAP;SLC25A37;LRRTM1;FAM110B;FAM20C;ITGB1BP1;NEFH;GABRD;AVPI1;PTPN3
Ventromedial hypothalamic nucleus, central part	13/301	0.298473	0.999992	0	0	1.20372	1.4554	RASGRF2;NPY1R;STMN3;SLC38A10;KCNA5;PDYN;ESR1;TRAIP;PCSK1N;GNB2;ERP29;NDN;SSBP4
Visceral area, layer 6b	13/301	0.298473	0.999992	0	0	1.20372	1.4554	GTF3C1;TIMM8B;LPL;NDUFC2;SERPINA9;PPP1CA;GNG10;GNG2;KCTD10;ZMYM6;CWC22;APBB1;UBXN6
anterior pretectal nucleus, dorsal core part	13/301	0.298473	0.999992	0	0	1.20372	1.4554	MRPS28;CAMK2D;KCNC2;DCAKD;PCDHGC3;LAPTM5;LRRTM1;FAM20C;SLC17A6;SREK1;GABRD;RXRG;PTPN3
basal plate of m1	13/301	0.298473	0.999992	0	0	1.20372	1.4554	CREBZF;ALDH1L1;KCNG4;SLC35C2;COL11A1;ESRRG;SGPP2;GRHPR;ZFP14;DNPEP;PPIP5K2;FGFR1OP;DRD2
bed nucleus of the stria terminalis, mediocentral division	13/301	0.298473	0.999992	0	0	1.20372	1.4554	GPX1;SLC32A1;SERPINA9;PDYN;GPR6;ESR1;ADCY5;TRAIP;INF2;ADORA2A;TMEM215;DRD2;CRYM
central part of MPO	13/301	0.298473	0.999992	0	0	1.20372	1.4554	GABRQ;LAMB2;SLC38A10;NR2F2;ESR1;PCSK1N;RPS19;PITPNM1;PNOC;ERP29;NDN;MAP3K11;SSBP4
deep white layer of SC	13/301	0.298473	0.999992	0	0	1.20372	1.4554	ALDH1L1;RPS8;COL11A1;RASGRF2;NR2F2;SEMA3F;RND2;KCNAB3;PLCXD2;DISP2;VAMP1;SLC17A6;TAC1
dorsal preisthmic part of periaqueductal gray	13/301	0.298473	0.999992	0	0	1.20372	1.4554	DDR1;SREBF1;PLK5;COL11A1;NR2F2;SEMA3F;DUSP11;SCAMP4;TUBA1A;ZMYM6;APOE;VIM;CCNL1
dorsolateral IC periaqueductal gray	13/301	0.298473	0.999992	0	0	1.20372	1.4554	ALDH1L1;PLK5;RPS8;COL11A1;RASGRF2;NR2F2;SEMA3F;PLCXD2;LMF1;DISP2;VAMP1;SLC17A6;RXRG
dorsolateral SC part of the periaqueductal gray	13/301	0.298473	0.999992	0	0	1.20372	1.4554	ALDH1L1;METRN;RPS8;COL11A1;RASGRF2;NR2F2;SEMA3F;RND2;PLCXD2;DISP2;VAMP1;SLC17A6;TAC1
horizontal nucleus of the diagonal band, transitional part	13/301	0.298473	0.999992	0	0	1.20372	1.4554	NTRK1;KCNIP1;LAMB2;AARSD1;SLC30A10;GPR6;ADCY5;ADORA2A;LCN2;TAC1;RXRG;MAP3K11;SSBP4
intermediate stratum of DTTh	13/301	0.298473	0.999992	0	0	1.20372	1.4554	MRPS28;KCNC2;PCDHGC3;ACSL3;SLC25A37;LRRTM1;FAM110B;FAM20C;NEK1;TLN2;GABRD;AVPI1;PTPN3
intermediate stratum of RtC	13/301	0.298473	0.999992	0	0	1.20372	1.4554	GSN;GPX1;KCNIP1;NR2F1;ESRRG;ACSL3;FAM163A;LRRTM1;PNOC;FAM20C;TLN2;GABRD;PVALB
intermediate stratum of TG	13/301	0.298473	0.999992	0	0	1.20372	1.4554	ALDH1L1;TMEM200A;COL11A1;CLU;VTN;GJB6;ID3;VAMP1;SREK1;MCM6;P4HB;RAMP1;CDH19
intermediate white layer of SC	13/301	0.298473	0.999992	0	0	1.20372	1.4554	PHF2;ALDH1L1;PLK5;RASGRF2;SEMA3F;KCNAB3;PLCXD2;LMF1;DISP2;TMEM145;GJB6;VAMP1;RAMP1
intralaminar nuclei	13/301	0.298473	0.999992	0	0	1.20372	1.4554	MRPS28;GABRB2;KCNC2;PCDHGC3;ACSL3;SLC25A37;LRRTM1;FAM110B;FAM20C;TLN2;GABRD;AVPI1;PTPN3
lateral IC periaqueductal gray	13/301	0.298473	0.999992	0	0	1.20372	1.4554	ALDH1L1;PLK5;METRN;RPS8;COL11A1;RASGRF2;NR2F2;SEMA3F;RND2;CLU;DISP2;VAMP1;SLC17A6
lateral part of alar p3	13/301	0.298473	0.999992	0	0	1.20372	1.4554	GSN;GPX1;KCNIP1;NR2F1;ESRRG;ACSL3;FAM163A;LRRTM1;PNOC;FAM20C;TLN2;GABRD;PVALB
lateral part of preisthmic periaqueductal gray	13/301	0.298473	0.999992	0	0	1.20372	1.4554	ALDH1L1;METRN;RPS8;COL11A1;RASGRF2;SEMA3F;RND2;ESR1;DISP2;SLC17A6;PIN1;YPEL5;RXRG
lateral subhabenular nucleus	13/301	0.298473	0.999992	0	0	1.20372	1.4554	MRPS28;CAMK2D;ACSL3;AARSD1;PLCXD2;ZMYM6;ID3;TLN2;STX3;FCGR2B;RXRG;AVPI1;PTPN3
layer 2 of AOV cortex	13/301	0.298473	0.999992	0	0	1.20372	1.4554	IPO13;PHF2;CAMK2D;YBX1;SLC30A10;C1QTNF4;PAN3;GNG7;NDST3;NHP2;NMT2;MAP3K10;GRIA3
layer 2 of PRh-Ect	13/301	0.298473	0.999992	0	0	1.20372	1.4554	TIMM8B;RBM39;RBM14;DDX54;SRP14;SYN1;CLK1;RBM15B;PRPF39;FAM102A;DNAJC21;STUB1;APBB1
layer 4 of CCx	13/301	0.298473	0.999992	0	0	1.20372	1.4554	PHF2;ALAS2;TMEM200A;CLU;TRHDE;TTBK1;SLC8A1;ZMYM1;NR4A3;SMPD1;TMEM126A;SERPINI1;STX3
layer 4 of RSC	13/301	0.298473	0.999992	0	0	1.20372	1.4554	EPHA5;TIMM8B;RBM14;NCAPH2;PIK3R1;PRKCZ;SYN1;VPS72;CHMP1A;STUB1;APBB1;MET;MAP3K11
layer 5 of RSC	13/301	0.298473	0.999992	0	0	1.20372	1.4554	TIMM8B;RBM14;CLSTN2;NCAPH2;PIK3R1;FBXL16;PRKCZ;TRHDE;SLC8A1;VPS72;ZMIZ2;CHMP1A;MAP3K11
layer 6 of CCx	13/301	0.298473	0.999992	0	0	1.20372	1.4554	NDUFB9;ALAS2;TMEM200A;NDUFC2;FMN2;DYNLL1;SREBF2;SLC8A1;PPME1;SMPD1;NDST3;PSME4;SERPINI1
layer 6 of PaS	13/301	0.298473	0.999992	0	0	1.20372	1.4554	ANKRD29;CLSTN2;TMEM200A;NR2F1;FBXL16;CLU;TRHDE;SLC8A1;ADAMTS4;NDST3;ID3;SERPINI1;JUNB
layer 6a of PaS	13/301	0.298473	0.999992	0	0	1.20372	1.4554	ANKRD29;CLSTN2;TMEM200A;NR2F1;FOS;FBXL16;TRHDE;SLC8A1;ADAMTS4;NDST3;PITPNM2;ID3;SERPINI1
m1AD (DM) part of periaqueductal gray	13/301	0.298473	0.999992	0	0	1.20372	1.4554	IGSF8;SREBF1;PLK5;COL11A1;NR2F2;SEMA3F;DUSP11;GAP43;TUBA1A;PEX6;FLYWCH1;APOE;CCNL1
m2 part of paranigral nucleus	13/301	0.298473	0.999992	0	0	1.20372	1.4554	CREBZF;NTRK1;CADPS2;COL11A1;LPL;CLU;GLS;CLDN5;VTN;FAM163A;DNER;VIM;DRD2
m2 part of pararubral nucleus	13/301	0.298473	0.999992	0	0	1.20372	1.4554	CREBZF;ALDH1L1;LRRC24;SLC35C2;ESRRG;RND2;SGPP2;ZFP14;DNPEP;DDT;PNOC;FGFR1OP;DRD2
mantle zone of CCx	13/301	0.298473	0.999992	0	0	1.20372	1.4554	NDUFB9;ALAS2;TMEM200A;CCDC124;NDUFA2;TESK1;NDUFC2;SLC8A1;PPME1;SMPD1;NDST3;PSME4;SERPINI1
mantle zone of RtC	13/301	0.298473	0.999992	0	0	1.20372	1.4554	GSN;GPX1;KCNIP1;NR2F1;ESRRG;ACSL3;FAM163A;LRRTM1;PNOC;FAM20C;TLN2;GABRD;PVALB
mantle zone of VAP	13/301	0.298473	0.999992	0	0	1.20372	1.4554	CAMK2D;EGLN2;NR2F1;LPL;PRKCZ;LIME1;ESR1;PRPF39;TCEAL5;DMWD;PKIG;TOMM6;MAPK3
mantle zone of m1AD	13/301	0.298473	0.999992	0	0	1.20372	1.4554	IGSF8;PLK5;RPS8;RASGRF2;PPP1R16A;NR2F2;SEMA3F;CLU;DISP2;DUSP11;SLC17A6;CCNL1;RAMP1
mantle zone of m1B	13/301	0.298473	0.999992	0	0	1.20372	1.4554	CREBZF;ALDH1L1;LRRC24;KCNG4;SLC35C2;COL11A1;ESRRG;SGPP2;ZFP14;DNPEP;PPIP5K2;FGFR1OP;DRD2
mantle zone of r2BI	13/301	0.298473	0.999992	0	0	1.20372	1.4554	RTN2;NTRK1;NDUFB5;SLC35C2;RND2;S100B;FSTL1;GLS;GRHPR;DNPEP;DDT;FAM163A;YPEL5
mantle zone of r2BM	13/301	0.298473	0.999992	0	0	1.20372	1.4554	CREBZF;NTRK1;NDUFB5;STARD10;KCNJ16;RND2;FSTL1;GLS;KRTCAP2;PDLIM2;VSNL1;DDT;FAM163A
medial amygdala, anteroventral part	13/301	0.298473	0.999992	0	0	1.20372	1.4554	NECAB2;CAMK2D;EGLN2;NR2F1;NME3;KCNJ16;LIME1;ADCY5;PENK;PKIG;RXRG;SSBP4;TOMM6
medial part of r4B	13/301	0.298473	0.999992	0	0	1.20372	1.4554	RTN2;CREBZF;OSBPL6;IQSEC3;ESRRG;AGAP3;SLC30A10;GLS;EFNB1;KRTCAP2;PDLIM2;TMCC2;MCM2
oculomotor nucleus, Edinger-Westphal subnucleus	13/301	0.298473	0.999992	0	0	1.20372	1.4554	VPS18;LRRC24;NCAPH2;COX4I1;PPP1R16A;ATP5C1;USE1;MRPL54;PNOC;PSMB1;TMEM126A;STX3;FAU
pararubral nucleus, m1 part	13/301	0.298473	0.999992	0	0	1.20372	1.4554	RTN2;ALDH1L1;LRRC24;KCNG4;ESRRG;RND2;SGPP2;PRDX2;ZFP14;DNPEP;DDT;FGFR1OP;DRD2
perirhinal-ectorhinal cortex	13/301	0.298473	0.999992	0	0	1.20372	1.4554	TIMM8B;RBM39;RBM14;NCOA5;DDX54;SRP14;CLK1;RBM15B;PRPF39;FAM102A;DNAJC21;STUB1;APBB1
periventricular stratum of Dg	13/301	0.298473	0.999992	0	0	1.20372	1.4554	GPX1;SLC32A1;SERPINA9;PDYN;GPR6;ESR1;ADCY5;TRAIP;INF2;ADORA2A;TMEM215;DRD2;CRYM
periventricular stratum of IC	13/301	0.298473	0.999992	0	0	1.20372	1.4554	ALDH1L1;PLK5;RPS8;COL11A1;RASGRF2;NR2F2;SEMA3F;RND2;PLCXD2;LMF1;DISP2;VAMP1;SLC17A6
periventricular stratum of RtC	13/301	0.298473	0.999992	0	0	1.20372	1.4554	DDR1;GABRQ;WSB1;KCNC2;ABHD8;ATP11B;SLC30A10;CLDN5;GAP43;PITPNM1;ERP29;TKT;FCGR2B
periventricular stratum of SC	13/301	0.298473	0.999992	0	0	1.20372	1.4554	ALDH1L1;METRN;RPS8;COL11A1;RASGRF2;NR2F2;SEMA3F;RND2;PLCXD2;DISP2;VAMP1;SLC17A6;TAC1
periventricular stratum of m1AD	13/301	0.298473	0.999992	0	0	1.20372	1.4554	IGSF8;SREBF1;PLK5;COL11A1;NR2F2;SEMA3F;DUSP11;GAP43;TUBA1A;PEX6;FLYWCH1;APOE;CCNL1
periventricular stratum of m2AD	13/301	0.298473	0.999992	0	0	1.20372	1.4554	DDR1;SREBF1;PLK5;COL11A1;NR2F2;SEMA3F;DUSP11;SCAMP4;TUBA1A;ZMYM6;APOE;VIM;CCNL1
periventricular stratum of r8BM	13/301	0.298473	0.999992	0	0	1.20372	1.4554	DDR1;TNK2;KCNA5;NDUFC1;HARS2;PSMA7;ADRA2A;MRPL11;KRTCAP2;PDLIM2;KCTD10;CHMP1A;FAU
periventricular stratum of the VAP	13/301	0.298473	0.999992	0	0	1.20372	1.4554	IPO13;RBM14;EGLN2;LRRN2;NR2F1;LPL;LIME1;ESR1;PRPF39;RXRG;PLTP;TOMM6;MAPK3
posterior intralaminar nucleus	13/301	0.298473	0.999992	0	0	1.20372	1.4554	MRPS28;GABRB2;KCNC2;ACSL3;PLCXD2;SLC25A37;ZFP14;LRRTM1;FAM110B;FAM20C;GABRD;AVPI1;PTPN3
posteromedial visual area	13/301	0.298473	0.999992	0	0	1.20372	1.4554	KCNH3;EGR2;ARPP21;NCOA5;PIK3R1;FOS;TTBK1;SYN1;NR4A3;TNRC18;SF3B1;RXRG;CDH19
posteromedial visual area, layer 1	13/301	0.298473	0.999992	0	0	1.20372	1.4554	KCNH3;EGR2;CELSR1;CLU;TTBK1;TMEM198;LMF1;SCAMP4;PER3;FGFR1OP;TNRC18;SF3B1;RAMP1
posteromedial visual area, layer 5	13/301	0.298473	0.999992	0	0	1.20372	1.4554	EGR2;ARPP21;NCOA5;LRP1;NRXN1;PIK3R1;FOS;TTBK1;SYN1;PPME1;SMPD1;TNRC18;SF3B1
[truncated: 1,596 more rows]

## Sheet: E. Allen Brain Atlas down
EnrichR enrichment for Allen Brain Atlas down Genes
[truncated: 2,194 more rows]

## Sheet: F. KEGG pathway EnrichR
EnrichR enrichment for KEGG pathways
[truncated: 131 more rows]

## Sheet: G. gProfiler_mmusculus_KEGG
g:profiler enrichment for KEGG pathways
[truncated: 26 more rows]

[truncated: 4 more sheets: H. Elsevier Pathway Collection, I . MGI Mammalian Phenotype, J. DEGs human Orthologs, K. overlapping genes with SFARI]
