# Supplementary material for: Camk2a-Cre and Tshz3 Expression in Mouse Striatal Cholinergic Interneurons: Implications for Autism Spectrum Disorder
Source: Front Genet. 2021 Jul 12;12:683959. doi: 10.3389/fgene.2021.683959 (PMC8328143; doi:10.3389/fgene.2021.683959)
Supplement: Supplementary file 2 [file Table_2.xlsx]

## Sheet: A. Elsevier_Pathway (SFARI)
Elsevier Pathway enrichment of human orthologs of DEGs associated with autistic spectrum disorders in SFARI
Term	Overlap	P-value	Adjusted P-value	Old P-value	Old Adjusted P-value	Odds Ratio	Combined Score	Genes
Proteins Involved in Epilepsy	8/270	6.04618e-07	0.00104055	0	0	10.9739	157.132	SNAP25;GABRB2;GRIN2A;ADORA2A;DPYSL2;ATP1A3;SYN1;SCN1A
NMDA Receptors -> Ca2+/CREB Activation/PGE2 Synthesis	3/17	1.23167e-05	0.0105986	0	0	65.3595	738.86	GRIN2A;HRAS;MAPK3
Synaptic Exocytosis in Dementia	3/24	3.61735e-05	0.0207515	0	0	46.2963	473.481	SNAP25;SYN1;MAPK3
High Fat Diet Activates cAMP Related Exocytosis in Synapse and Endocrine Cell	3/30	7.17348e-05	0.0246911	0	0	37.037	353.427	HRAS;SYN1;MAPK3
GABA(B)R -> Postsynaptic Inhibition	3/28	5.8104e-05	0.0249993	0	0	39.6825	387.035	SNAP25;SYN1;MAPK3
Proteins Involved in Cataract	4/94	0.000120878	0.034672	0	0	15.7604	142.171	GPX1;ANK2;MET;SOD1
Proteins Involved in Huntington Disease	4/98	0.000142049	0.0349237	0	0	15.1172	133.928	GRIN2A;ADORA2A;PPP1R1B;DRD2
Proteins Involved in Clear Cell Ovarian Carcinoma	3/46	0.000260146	0.0559639	0	0	24.1546	199.378	HRAS;MET;MAPK3
Proteins Involved in High-Grade Serous Ovarian Carcinoma	3/57	0.000491037	0.0650058	0	0	19.4932	148.518	HRAS;MET;MAPK3
Fatty Acid Synthase (FASN) Signaling	2/16	0.000838041	0.0655577	0	0	46.2963	327.983	MET;MAPK3
Growth Factor Signaling in Pancreatic Neoplasms	3/70	0.000896181	0.0670577	0	0	15.873	111.387	HRAS;MET;MAPK3
DRD2 Pharmacological Inhibition in Hyperprolactinemia	2/16	0.000838041	0.0686795	0	0	46.2963	327.983	DRD2;MAPK3
EGFR and PTAFR Signaling in Ovarian Cancer	2/21	0.00145395	0.0695067	0	0	35.2734	230.458	HRAS;MAPK3
Prolactinoma Overiew	3/57	0.000491037	0.0704229	0	0	19.4932	148.518	DRD2;HRAS;MAPK3
Proteins Involved in Arterial Hypertension	5/255	0.000615479	0.0706159	0	0	7.26216	53.69	GPX1;ADORA2A;DRD2;MAPK3;SOD1
Proteins Involved in Glaucoma	3/84	0.00151897	0.0706526	0	0	13.2275	85.8429	NTRK1;ADORA2A;MAPK3
CD157 -> cADPR/Calcium Signaling	2/21	0.00145395	0.0714926	0	0	35.2734	230.458	CD38;MAPK3
Exocytosis: Vesicle Fusion	2/16	0.000838041	0.0721134	0	0	46.2963	327.983	SNAP25;SYN1
Drugs Targets in Autistic Disoreder (Hypothesis)	2/22	0.00159658	0.0723082	0	0	33.67	216.831	NTRK1;DRD2
DRD2/4 -> Membrane Transport	2/12	0.000464124	0.0726143	0	0	61.7284	473.788	SNAP25;DRD2
Proteins Involved in Amyotrophic Lateral Sclerosis	4/181	0.00144191	0.0729863	0	0	8.18498	53.5444	CX3CR1;ADORA2A;ANK2;SOD1
Ethanol Induced Efects in Hyperprolactinemia	2/20	0.00131775	0.0731564	0	0	37.037	245.623	DRD2;MAPK3
Proteins Involved in Age-Related Macular Degeneration	4/148	0.000683125	0.0734786	0	0	10.01	72.9613	CX3CR1;ADORA2A;MAPK3;SOD1
Clear Cell Ovarian Carcinoma	3/81	0.0013679	0.0735676	0	0	13.7174	90.4592	HRAS;MET;MAPK3
Nociception Expression Targets Signaling	4/143	0.00060047	0.0738149	0	0	10.36	76.8485	GRIN2A;DRD2;HRAS;MAPK3
Growth Factor Signaling in Hepatocellular Carcinoma	3/82	0.00141715	0.0739067	0	0	13.5501	88.8768	HRAS;MET;MAPK3
Dopamine Action in CSD Progression	2/11	0.00038744	0.0740871	0	0	67.3401	529.02	DRD2;ADCY5
ADORA1/2A -> Exocytosis	2/15	0.000734556	0.0743629	0	0	49.3827	356.358	SNAP25;ADORA2A
Natural Killer Cell Precursor -> Natural Killer Cell Surface Expression Markers	3/78	0.00122668	0.0753967	0	0	14.245	95.4907	NTRK1;ADORA2A;CD38
Alzheimer's Disease	3/67	0.000788772	0.0754153	0	0	16.5837	118.491	GPX1;LRP1;APBB1
Proteins with Altered Expression in Cancer-Associated Sustaining of Proliferative Signaling	4/175	0.00127366	0.075585	0	0	8.46561	56.4306	NTRK1;CD38;HRAS;MET
Gap Junction Assembly	2/20	0.00131775	0.075595	0	0	37.037	245.623	DRD2;MAPK3
Glutamate Overdose and Aura Effect in Familial Hemiplegic Migraine Type 3	2/19	0.00118803	0.0757258	0	0	38.9864	262.591	SNAP25;SCN1A
WHIM Syndrome	2/16	0.000838041	0.0759089	0	0	46.2963	327.983	HRAS;MAPK3
Apoptosis and Immediate Early Gene Activation in Epileptiform Disorders	3/55	0.000441953	0.0760601	0	0	20.202	156.047	PPP1R1B;DRD2;MAPK3
Diabetes Induced Cataract	2/18	0.00106481	0.0763559	0	0	41.1523	281.685	GPX1;SOD1
Age-Related Cataract	2/23	0.00174561	0.0770308	0	0	32.2061	204.53	GPX1;SOD1
Axonal Transport Impairment in Hungtington Disease	2/19	0.00118803	0.0786383	0	0	38.9864	262.591	NTRK1;SNAP25
Mast-Cells De Novo Synthesized Mediators via IgE Independent Signaling	3/90	0.00185158	0.0796642	0	0	12.3457	77.6755	NTRK1;ADORA2A;MAPK3
PPARGC1A Repression in Huntington Disease	2/19	0.00118803	0.0817838	0	0	38.9864	262.591	GPX1;SOD1
Inherited Channelopathies	2/27	0.0024051	0.0844731	0	0	27.4348	165.437	GABRB2;SCN1A
Axonal Transport	2/25	0.00206276	0.0845239	0	0	29.6296	183.221	NTRK1;SNAP25
Glutamate Overdose and Aura Effect Overiew	2/27	0.0024051	0.086233	0	0	27.4348	165.437	SNAP25;SCN1A
Leptin and CCK8 Activate Nodose Ganglia Neuron	2/25	0.00206276	0.0865855	0	0	29.6296	183.221	HRAS;MAPK3
Glutamate Overdose and Aura Effect Caused by Mutations in SLC1A3 Gene	2/27	0.0024051	0.0880677	0	0	27.4348	165.437	SNAP25;SCN1A
Glutamate Overdose and Aura Effect Caused by Mutations in PRRT2 Gene	2/26	0.0022308	0.0892838	0	0	28.49	173.943	SNAP25;SCN1A
Ca2+ Toxicity in Neurons	2/27	0.0024051	0.0899822	0	0	27.4348	165.437	GPX1;APBB1
NTSR1 Expression Targets	2/27	0.0024051	0.0919819	0	0	27.4348	165.437	DRD2;MAPK3
Proteins Involved in Parkinson's Disease	3/98	0.00236102	0.092348	0	0	11.3379	68.5789	ADORA2A;DRD2;SOD1
RAS/RAF/MAPK Signaling Activation in Cancer	2/29	0.00277238	0.0954254	0	0	25.5428	150.397	HRAS;MAPK3
Ca2+ Flux Regulation	3/109	0.00319156	0.105628	0	0	10.1937	58.5856	NTRK1;GRIN2A;DRD2
CD38/CD3 -> JUN/FOS/NF-kB Signaling in T-cell Proliferation	2/31	0.00316432	0.10678	0	0	23.8949	137.534	CD38;MAPK3
Glutamate Toxiicity Effects on Striatum Medium Spiny Neurons in Hantington's Disease	2/32	0.00336946	0.107386	0	0	23.1481	131.782	ADORA2A;DRD2
Hepatocellular Carcinoma	3/112	0.00344534	0.107808	0	0	9.92063	56.2573	HRAS;MET;MAPK3
Endothelial Cell Dysfunction in Arterial Hypertension	2/32	0.00336946	0.109412	0	0	23.1481	131.782	HRAS;MAPK3
Pancreatic Ductal Carcinoma	3/117	0.00389516	0.119707	0	0	9.49668	52.6877	HRAS;MET;MAPK3
Norepinephrine Release Regulation	2/36	0.00425033	0.126118	0	0	20.5761	112.361	SNAP25;MAPK3
Dopamine Receptors Signaling	2/36	0.00425033	0.12833	0	0	20.5761	112.361	DRD2;MAPK3
HGFR -> AP-1/CREB/MYC Signaling	2/38	0.0047265	0.135572	0	0	19.4932	104.378	MET;MAPK3
Receptors and Adaptor Proteins Activated in Cancer	3/125	0.00468642	0.1367	0	0	8.88889	47.6719	NTRK1;CD38;MET
CD38/CD19 -> JUN/FOS/NF-kB Signaling in B-cell Proliferation	2/39	0.00497341	0.138052	0	0	18.9934	100.734	CD38;MAPK3
Ovarian Cancer	3/130	0.00522682	0.13839	0	0	8.54701	44.9056	HRAS;MET;MAPK3
DRD2 Expression Targets	2/39	0.00497341	0.140315	0	0	18.9934	100.734	DRD2;MAPK3
Proteins Involved in Alzheimer's Disease	3/130	0.00522682	0.140553	0	0	8.54701	44.9056	GRIN2A;LRP1;APBB1
Megakaryocyte -> Platelet Precursor Cell Surface Expression Markers	2/41	0.00548471	0.140883	0	0	18.0668	94.0522	LRP1;CD38
Dendritic Spine Morphogenesis and Stabilization	2/40	0.00522616	0.142765	0	0	18.5185	97.2978	HRAS;PPP1R9B
RAS/RAF/MAPK Signaling Activation by Blocking of Tumor Suppressors	2/41	0.00548471	0.143018	0	0	18.0668	94.0522	HRAS;MAPK3
Proteins Involved in Migraine	2/42	0.00574903	0.145501	0	0	17.6367	90.9828	ADORA2A;SCN1A
Ras-GRF Regulation Signaling	2/44	0.00629487	0.148404	0	0	16.835	85.3202	NTRK1;MAPK3
Proteins Involved in Mucinous Ovarian Carcinoma	2/43	0.0060191	0.150129	0	0	17.2265	88.0761	HRAS;MAPK3
Arterial Hypertension	2/44	0.00629487	0.150465	0	0	16.835	85.3202	HRAS;MAPK3
CagA Phosphorylation Dependent Signaling	2/45	0.00657633	0.150905	0	0	16.4609	82.7042	HRAS;MAPK3
Norepinephrine Neuronal Release	2/44	0.00629487	0.152584	0	0	16.835	85.3202	SNAP25;SYN1
Proteins Involved in Presbycusis	2/45	0.00657633	0.152944	0	0	16.4609	82.7042	GPX1;SOD1
Peripheral Tissue Microangiopathy	2/46	0.00686343	0.153402	0	0	16.1031	80.2182	HRAS;MAPK3
Growth Factor Signaling in Neuroblastoma	2/47	0.00715614	0.153947	0	0	15.7604	77.8532	NTRK1;MAPK3
Glioblastoma, Primary	2/48	0.00745444	0.154567	0	0	15.4321	75.601	MET;MAPK3
Proteins Involved in Erectile Dysfunction	2/44	0.00629487	0.154764	0	0	16.835	85.3202	NTRK1;MAPK3
Proteins with Altered Expression in Melanoma	2/46	0.00686343	0.155421	0	0	16.1031	80.2182	MET;MAPK3
ERK/MAPK Canonical Signaling	2/47	0.00715614	0.155895	0	0	15.7604	77.8532	NTRK1;MAPK3
Proteins Involved in Low-Grade Serous Ovarian Carcinoma	2/48	0.00745444	0.156452	0	0	15.4321	75.601	HRAS;MAPK3
TGFBR Signaling in Pancreatic Neoplasms	2/47	0.00715614	0.157894	0	0	15.7604	77.8532	HRAS;MAPK3
Proteins Involved in Endometrioid Ovarian Carcinoma	2/48	0.00745444	0.158384	0	0	15.4321	75.601	HRAS;MAPK3
Platelet Activation via GPCR Signaling	2/49	0.0077583	0.158953	0	0	15.1172	73.4542	ADORA2A;MAPK3
Glioblastoma, Secondary	2/50	0.00806767	0.161447	0	0	14.8148	71.4058	MET;MAPK3
Myocardial Remodeling	2/51	0.00838254	0.162094	0	0	14.5243	69.4496	HRAS;MAPK3
Smooth Muscle Cell Dysfunction in Arterial Hypertension	2/50	0.00806767	0.163347	0	0	14.8148	71.4058	HRAS;MAPK3
NTRK -> AP-1/CREB/ELK/SRF/MYC/SMAD3/TP53 Signaling	2/51	0.00838254	0.163936	0	0	14.5243	69.4496	NTRK1;MAPK3
VEGF Independent Angiogenesis in Cancer	2/52	0.00870286	0.164589	0	0	14.245	67.5798	MET;MAPK3
Scavenger Receptor OLR1 in Inflammation Related Endothelial Dysfunction	2/51	0.00838254	0.16582	0	0	14.5243	69.4496	HRAS;MAPK3
Prolactin Production	2/52	0.00870286	0.166418	0	0	14.245	67.5798	DRD2;MAPK3
Muscular Dystrophies	2/53	0.00902862	0.168894	0	0	13.9762	65.7911	MAPK3;SOD1
Airway Smooth Muscle Cell High Rate Proliferation	2/54	0.00935977	0.173206	0	0	13.7174	64.0787	HRAS;MAPK3
MITF as a Regulator of Melanoma Cell Development	2/57	0.0103853	0.188138	0	0	12.9955	59.3549	MET;MAPK3
Synovial Fibroblast Proliferation in Rheumatoid Arthritis	2/57	0.0103853	0.19014	0	0	12.9955	59.3549	ACTN4;MAPK3
Mucinous Ovarian Carcinoma	2/60	0.0114584	0.205415	0	0	12.3457	55.1733	HRAS;MAPK3
VEGFA Dependent Angiogenesis in Cancer	2/62	0.0121997	0.216451	0	0	11.9474	52.6445	HRAS;MAPK3
Proteins Involved in Glioblastoma	3/178	0.0123326	0.216575	0	0	6.2422	27.4377	LRP1;HRAS;MET
HGFR -> FOXO3A Signaling	1/5	0.0134285	0.222216	0	0	74.0741	319.287	MET
Androgen Receptor/c-Met Signaling in Prostate Cancer	1/5	0.0134285	0.224373	0	0	74.0741	319.287	MET
Toll-like Receptor Independent Sterile Inflammation	2/66	0.0137438	0.225267	0	0	11.2233	48.1164	HRAS;MAPK3
Myeloblast -> Neutrophil Surface Expression Markers	2/64	0.0129616	0.225323	0	0	11.5741	50.2982	NTRK1;CD38
Alveolar Epithelial Cell Dysfunction in COPD	2/67	0.0141424	0.225362	0	0	11.0558	47.0821	HRAS;MAPK3
Amyloid beta Clearance in Alzheimer Disease	1/5	0.0134285	0.226573	0	0	74.0741	319.287	LRP1
Skin Fibrosis	2/67	0.0141424	0.227468	0	0	11.0558	47.0821	HRAS;MAPK3
ADORA2A/B -> Vasodilation	1/5	0.0134285	0.228817	0	0	74.0741	319.287	ADORA2A
CD16/CD14 Proinflammatory Monocyte Activation	2/67	0.0141424	0.229614	0	0	11.0558	47.0821	CX3CR1;MAPK3
Proteins Involved in Hypertrophic Cardiomyopathy	2/65	0.0133502	0.229757	0	0	11.396	49.1877	HRAS;MAPK3
Low-Grade Serous Ovarian Carcinoma	2/70	0.015368	0.238274	0	0	10.582	44.1848	HRAS;MAPK3
Chronic Myeloid Leukemia	2/70	0.015368	0.24044	0	0	10.582	44.1848	HRAS;MAPK3
Genes with Mutations Associated with Familial and Sporadic Hemiplegic Migraine	1/6	0.0160929	0.240834	0	0	61.7284	254.9	SCN1A
Proteins Involved in Male Infertility	3/193	0.0153032	0.241622	0	0	5.75705	24.0627	DMWD;SBF1;MAPK3
Pancreatic Neuroendocrine Tumors	2/71	0.0157864	0.242575	0	0	10.433	43.2823	HRAS;MAPK3
IGF1R -> ARRB1/ERK1/3 Signaling	1/6	0.0160929	0.242946	0	0	61.7284	254.9	MAPK3
Proteins Involved in Lesch-Nyhan Syndrome	1/6	0.0160929	0.245096	0	0	61.7284	254.9	PPP1R1B
TAM Receptor Signaling Activation in Cancer	2/74	0.0170707	0.253264	0	0	10.01	40.7447	MET;MAPK3
Endometrioid Ovarian Carcinoma	2/76	0.0179508	0.264046	0	0	9.74659	39.1825	HRAS;MAPK3
ROS in Neutrophil Mediated Cell Damage	1/7	0.0187502	0.271169	0	0	52.9101	210.399	SOD1
Protein Oxidation and Aggregation in Aging	1/7	0.0187502	0.273467	0	0	52.9101	210.399	GPX1
HPRT1 Deficiency in Lesch-Nyhan Syndrome	1/8	0.0214005	0.292304	0	0	46.2963	177.979	GDA
High-Grade Serous Ovarian Carcinoma	2/82	0.0207038	0.294474	0	0	9.03342	35.0265	HRAS;MAPK3
HGFR -> STAT Signaling	1/8	0.0214005	0.294643	0	0	46.2963	177.979	MET
Proteins Involved in Neuroblastoma	3/216	0.0205797	0.295148	0	0	5.14403	19.9766	CX3CR1;NTRK1;HRAS
Androgen Receptor/FKBP5 Signaling	1/8	0.0214005	0.297019	0	0	46.2963	177.979	MAPK3
ADK Expression Downregulation after Acute Seizures	1/8	0.0214005	0.299433	0	0	46.2963	177.979	ADORA2A
Vascular Motility	2/85	0.0221423	0.300055	0	0	8.7146	33.2049	ADORA2A;MAPK3
non-Genomic Rapid Actions of Vitamin D in Vitamin D Biology	1/8	0.0214005	0.301888	0	0	46.2963	177.979	MAPK3
Mitochondrial Respiratory Chain Dysfunction	1/9	0.0240438	0.30426	0	0	41.1523	153.411	SOD1
Glioblastoma, Mesenchymal Subtype	1/9	0.0240438	0.306514	0	0	41.1523	153.411	MET
Cochlear Hair Cell Synapse Proteins Mutations (Age-Related/Congenital)	1/9	0.0240438	0.308801	0	0	41.1523	153.411	SNAP25
APP Processing in Alzheimer Disease	1/9	0.0240438	0.311123	0	0	41.1523	153.411	APBB1
Proteins with Altered Expression in Cancer-Associated DNA Methylation	1/9	0.0240438	0.31348	0	0	41.1523	153.411	MBD3
HRH1/3 -> Synaptic Transmission	1/9	0.0240438	0.315873	0	0	41.1523	153.411	SNAP25
Proteins Involved in HIV Type 1 Infection	2/88	0.0236212	0.317594	0	0	8.41751	31.5287	CX3CR1;CD38
DRD2 -> TRPC1 Transcription	1/9	0.0240438	0.318303	0	0	41.1523	153.411	DRD2
Adenosine Role in Sleep Regulation	1/9	0.0240438	0.32077	0	0	41.1523	153.411	ADORA2A
B-Cell Chronic Lymphocytic Leukemia	2/94	0.0266971	0.325856	0	0	7.88022	28.5516	CD38;MAPK3
Proteins Involved in Pancreatic Cancer	2/94	0.0266971	0.328183	0	0	7.88022	28.5516	MET;MAPK3
HCAR1/HCAR2 -> MAPK Signaling	1/10	0.0266801	0.330334	0	0	37.037	134.216	MAPK3
Vasodilation Activation	1/10	0.0266801	0.332727	0	0	37.037	134.216	ADORA2A
Proteins Mutated in Cochlear Hair Cell Synapse	1/10	0.0266801	0.335156	0	0	37.037	134.216	SNAP25
Metals and Amyloid beta Toxicity in Alzheimer's Disease	1/11	0.0293093	0.338533	0	0	33.67	118.85	GPX1
GABRB3 Mutation and Adenosine Deaminase Polymorphism	1/11	0.0293093	0.34082	0	0	33.67	118.85	ADORA2A
PECAM -> SP1 Signaling	1/11	0.0293093	0.343138	0	0	33.67	118.85	MAPK3
Alstrom Syndrome Progression (Hypothesis)	1/11	0.0293093	0.345489	0	0	33.67	118.85	ACTN4
Adherens Junctions Dysfunction in Cardiomyocyte	1/11	0.0293093	0.347871	0	0	33.67	118.85	ACTN4
Uric Acid Synthesis in Gout	1/11	0.0293093	0.350287	0	0	33.67	118.85	GDA
Proteins Involved in Myocardial Ischemia	3/252	0.0306114	0.351215	0	0	4.40917	15.3721	ADORA2A;MAPK3;SOD1
Microtubule Cytoskeleton	1/12	0.0319316	0.352271	0	0	30.8642	106.301	DPYSL2
Histamine in Arousal Regulation	1/11	0.0293093	0.352737	0	0	33.67	118.85	SNAP25
Adenosine/cAMP Promote Immunosuppression by Treg Cells	1/12	0.0319316	0.354544	0	0	30.8642	106.301	ADORA2A
ADRB1 -> Prostaglandin Generation	1/11	0.0293093	0.355221	0	0	33.67	118.85	MAPK3
VEGFA High Expression Level in Pulmonary Emphysema	1/12	0.0319316	0.356846	0	0	30.8642	106.301	MAPK3
Mast-Cell Activation without Degranulation through CYSLTR1/CYSLTR2 Signaling	1/12	0.0319316	0.359179	0	0	30.8642	106.301	MAPK3
Fatty Acids Cause Oxidative Stress and Mitochondria Decline in Aging	1/12	0.0319316	0.361542	0	0	30.8642	106.301	GPX1
Endocannabinoids Role in Sleep Regulation	1/12	0.0319316	0.363936	0	0	30.8642	106.301	SNAP25
HMGB1/RAGE Signaling in Middle Ear Cholesteatoma	1/13	0.034547	0.367008	0	0	28.49	95.8814	MAPK3
Dopamine Metabolism in Parkinson's Disease	1/13	0.034547	0.369288	0	0	28.49	95.8814	DRD2
Oxidative Stress in Vitiligo	1/14	0.0371554	0.369621	0	0	26.455	87.1071	SOD1
OR1A1 -> GNAS Signaling	1/13	0.034547	0.371596	0	0	28.49	95.8814	MAPK3
Neurotoxin Effects in Parkinson's Disease	1/14	0.0371554	0.37177	0	0	26.455	87.1071	GPX1
Chemokines Signaling in Atherosclerosis	1/13	0.034547	0.373933	0	0	28.49	95.8814	CX3CR1
Glutamate, D-Serine, and ATP Release from Astrocytes	1/14	0.0371554	0.373944	0	0	26.455	87.1071	SNAP25
Muscarinic Receptor-Mediated Airway Smooth Muscle Contraction	1/15	0.0397569	0.375943	0	0	24.6914	79.629	CD38
P2RXs -> Synaptic Transmission	1/14	0.0371554	0.376144	0	0	26.455	87.1071	SNAP25
Hodgkin Lymphoma	2/110	0.0356319	0.376211	0	0	6.73401	22.4546	NTRK1;MAPK3
VEGFA Low Expression Level in Chronic Bronchitis	1/13	0.034547	0.3763	0	0	28.49	95.8814	MAPK3
Estrogen Effects in Mitochondria in Alzheimer Disease	1/15	0.0397569	0.37802	0	0	24.6914	79.629	SOD1
Oxidative Stress in Amyotrophic Lateral Sclerosis	1/14	0.0371554	0.378369	0	0	26.455	87.1071	SOD1
Dopamine Mediated Glutamate Release/Uptake Circle in Neuron in Migraine	1/13	0.034547	0.378696	0	0	28.49	95.8814	SNAP25
TNFRSF6 -> HSF1 Signaling	1/15	0.0397569	0.38012	0	0	24.6914	79.629	MAPK3
MUC5AC Expression by NTHi and S. Pneumoniae	1/21	0.0552216	0.380145	0	0	17.6367	51.0829	MAPK3
Melatonin in Cell Survival and Antioxidant Response	1/14	0.0371554	0.380621	0	0	26.455	87.1071	MAPK3
Proteins Involved in Ulcerative Colitis	2/141	0.0556601	0.381638	0	0	5.25348	15.1746	CX3CR1;SOD1
IL1B Induced Arthralgia	1/21	0.0552216	0.381672	0	0	17.6367	51.0829	MAPK3
Proteins Involved in Diabetes Mellitus Type 2	2/115	0.0386306	0.382088	0	0	6.44122	20.9579	DRD2;SOD1
NCAM1 -> CREB/ELK/SRF/MYC Signaling	1/15	0.0397569	0.382243	0	0	24.6914	79.629	MAPK3
Low-Density Lipoproteins and Chemokines in Atherosclerosis	1/22	0.0577752	0.382427	0	0	16.835	47.9999	CX3CR1
GRM2-4/6-8 (Presynaptic) -> Glutamate Release Attenuation	1/14	0.0371554	0.382901	0	0	26.455	87.1071	SNAP25
IL17F Signaling in Bronchial Epithelial Cell in Asthma	1/21	0.0552216	0.383211	0	0	17.6367	51.0829	MAPK3
IL4R -> ELK/SRF/HMGY Signaling	1/22	0.0577752	0.383904	0	0	16.835	47.9999	MAPK3
MTNR1 Signaling	1/15	0.0397569	0.384391	0	0	24.6914	79.629	MAPK3
UrokinaseR -> ELK/SRF Signaling	1/23	0.060322	0.384497	0	0	16.1031	45.2183	MAPK3
Glutamate Overdose and Aura Effect in Migraine Type 1	1/21	0.0552216	0.384763	0	0	17.6367	51.0829	SNAP25
Estrogens in Prolactin Production	1/14	0.0371554	0.385207	0	0	26.455	87.1071	DRD2
CD19 -> JUN/ELK Signaling	1/22	0.0577752	0.385392	0	0	16.835	47.9999	MAPK3
Myeloid Cell Differentiation Block in Leukemia	1/25	0.0653953	0.385429	0	0	14.8148	40.4045	HRAS
Melanoma	2/145	0.0584781	0.385597	0	0	5.10856	14.5037	MET;MAPK3
Complement System Defects in Systemic Lupus Erythematosis	1/23	0.060322	0.385926	0	0	16.1031	45.2183	LRP1
FSH Action in Polycystic Ovary Syndrome	1/21	0.0552216	0.386327	0	0	17.6367	51.0829	MAPK3
Genes with Mutations in Cancer-Associated Sustaining of Proliferative Signaling	2/112	0.03682	0.386386	0	0	6.61376	21.8367	HRAS;MET
GLP1R -> ARRB1 Signaling	1/15	0.0397569	0.386563	0	0	24.6914	79.629	MAPK3
PGF2-alpha Effect on Treatment	1/17	0.0449392	0.386702	0	0	21.7865	67.5914	MAPK3
Local Estrogen Production in Endometriosis	1/25	0.0653953	0.386754	0	0	14.8148	40.4045	NR2F1
AGE Related Insulin Resistance in Skeletal Muscles	1/22	0.0577752	0.386891	0	0	16.835	47.9999	MAPK3
Mitochondrial Dysfunction in Alzheimer's Disease	1/26	0.0679219	0.387065	0	0	14.245	38.3105	SOD1
ICAM1 -> AP-1/CREB/ELK/SRF Signaling	1/23	0.060322	0.387366	0	0	16.1031	45.2183	MAPK3
Protein Kinase C in Diabetic Microangiopathy	1/14	0.0371554	0.387542	0	0	26.455	87.1071	MAPK3
Microangiopathy in Diabetic Neuropathy	1/24	0.062862	0.387762	0	0	15.4321	42.6977	MAPK3
Dopamine Synthesis and Release in Migraine	1/21	0.0552216	0.387903	0	0	17.6367	51.0829	DRD2
Genes with Mutations Associated with Age-Related Macular Degeneration	1/25	0.0653953	0.388087	0	0	14.8148	40.4045	CX3CR1
Microglia and Motor Neuron Interaction Dysregulation	1/26	0.0679219	0.388351	0	0	14.245	38.3105	CX3CR1
Advanced Glycation End Products Pathway in Diabetic Microangiopathy	1/22	0.0577752	0.388403	0	0	16.835	47.9999	HRAS
Leptin Role in Endometriosis	1/17	0.0449392	0.388645	0	0	21.7865	67.5914	MAPK3
CHRNA7 -> CREB Signaling	1/15	0.0397569	0.388759	0	0	24.6914	79.629	MAPK3
BDNF Upregulation Triggered by Seizures	1/23	0.060322	0.388817	0	0	16.1031	45.2183	MAPK3
Keratinocyte Proliferation in Acne Vulgaris	1/20	0.0526612	0.38897	0	0	18.5185	54.5162	MAPK3
Amyloid beta Traffic and Degradation in Extracellular Matrix in Alzheimer's Disease	1/24	0.062862	0.389157	0	0	15.4321	42.6977	LRP1
Endothelial Cell Dysfunction in Early Diabetic Nephropathy	1/25	0.0653953	0.38943	0	0	14.8148	40.4045	MAPK3
NOTCH -> TCF3 Signaling	1/21	0.0552216	0.389493	0	0	17.6367	51.0829	MAPK3
GUCY2C Signaling in Colorectal Cancer	1/26	0.0679219	0.389645	0	0	14.245	38.3105	MET
Multiple Myeloma	2/121	0.0423518	0.389772	0	0	6.12182	19.3556	MET;MAPK3
DNMT and MBD Families Activation in DNA Methylation in Cancer	1/22	0.0577752	0.389926	0	0	16.835	47.9999	MBD3
Somatostatin Receptors Signaling	1/23	0.060322	0.390279	0	0	16.1031	45.2183	HRAS
ALK Associated Neuroblastoma	1/24	0.062862	0.390561	0	0	15.4321	42.6977	MAPK3
Hyperparathyroidism, Neonatal Severe	1/17	0.0449392	0.390608	0	0	21.7865	67.5914	MAPK3
Hypoparathyroidism, Primary	1/20	0.0526612	0.390646	0	0	18.5185	54.5162	MAPK3
CD8+ T-Cell Response to Self-Determinants in Diabetes	1/25	0.0653953	0.390782	0	0	14.8148	40.4045	MAPK3
Endothelial Cell Dysfunction in Progressive Diabetic Nephropathy	1/26	0.0679219	0.390949	0	0	14.245	38.3105	MAPK3
TRPM8 Effects in Prostate Cancer (Hypothesis)	1/15	0.0397569	0.39098	0	0	24.6914	79.629	MAPK3
InsulinR -> ELK/SRF/SREBF Signaling	1/21	0.0552216	0.391096	0	0	17.6367	51.0829	MAPK3
Proteins with Altered Expression in Aging	1/22	0.0577752	0.391461	0	0	16.835	47.9999	HRAS
NPY1R -> CRH/POMC Production	1/23	0.060322	0.391751	0	0	16.1031	45.2183	MAPK3
Metastatic Colorectal Cancer	2/121	0.0423518	0.391868	0	0	6.12182	19.3556	MET;MAPK3
Mutations in Krebs Cycle Enzymes in Cancer	1/24	0.062862	0.391977	0	0	15.4321	42.6977	TET2
Ca2+ Overload in Muscular Dystrophies	1/25	0.0653953	0.392144	0	0	14.8148	40.4045	MAPK3
APP and Glutamate Signaling Cause Neuronal Dysfunction in Alzheimer Disease	1/26	0.0679219	0.39226	0	0	14.245	38.3105	MAPK3
MIF Role in Cholesteatoma	1/27	0.0704418	0.392331	0	0	13.7174	36.3919	MAPK3
Genes with Mutations Associated with Asthma	1/20	0.0526612	0.392337	0	0	18.5185	54.5162	DPP10
SELE -> ELK-SRF Signaling	1/17	0.0449392	0.392591	0	0	21.7865	67.5914	MAPK3
CCL2 Role in CGRP Expression and Release	1/21	0.0552216	0.392712	0	0	17.6367	51.0829	SNAP25
CHRM1/2/3 -> Vascular Motility	1/22	0.0577752	0.393008	0	0	16.835	47.9999	MAPK3
Neutrophil Activation via LTB4/Polyisoprenyl Phosphate Signaling	1/23	0.060322	0.393235	0	0	16.1031	45.2183	MAPK3
Lactate as a Signaling Molecule in Cancer Cells	1/24	0.062862	0.393402	0	0	15.4321	42.6977	MAPK3
beta-Cell Recovery in Diabetes Mellitus	1/25	0.0653953	0.393515	0	0	14.8148	40.4045	SOD1
ROS and RNS in Vasoconstriction and Vasodilation Regulation	1/26	0.0679219	0.393581	0	0	14.245	38.3105	SOD1
Endothelin Signaling in Arterial Hypertension	1/27	0.0704418	0.393605	0	0	13.7174	36.3919	MAPK3
Neurofibrillary Tangle Formation	1/16	0.0423515	0.393983	0	0	23.1481	73.1887	GRIN2A
Dopamine Mediated Glutamate Release and Glutamate Uptake Circle	1/20	0.0526612	0.394043	0	0	18.5185	54.5162	SNAP25
Proteins Involved in Prostate Cancer	2/138	0.0535796	0.394062	0	0	5.36769	15.709	MET;MAPK3
IGF1R -> ELK/SRF/HIF1A/MYC/SREBF Signaling	1/21	0.0552216	0.394342	0	0	17.6367	51.0829	MAPK3
ADRA1 -> Prostaglandin Generation	1/22	0.0577752	0.394568	0	0	16.835	47.9999	MAPK3
PTPRC -> BCL6 Signaling	1/17	0.0449392	0.394594	0	0	21.7865	67.5914	MAPK3
HRH2/4 -> IL6/10 Production	1/23	0.060322	0.39473	0	0	16.1031	45.2183	MAPK3
beta-Cell Granules Exocytois	1/24	0.062862	0.394838	0	0	15.4321	42.6977	SNAP25
FGFR -> RUNX2 Signaling	1/27	0.0704418	0.394887	0	0	13.7174	36.3919	MAPK3
CD38 -> cADPR/Calcium Signaling	1/25	0.0653953	0.394896	0	0	14.8148	40.4045	MAPK3
PTGER2/3 -> Inflammation-Related Expression Targets	1/26	0.0679219	0.394911	0	0	14.245	38.3105	MAPK3
Glutamate Overdose and Aura Effect in Migraine Type 2	1/19	0.050094	0.395467	0	0	19.4932	58.3597	SNAP25
IL2R -> ELK/SRF/MYC Signaling	1/20	0.0526612	0.395764	0	0	18.5185	54.5162	MAPK3
B-Cell Receptor -> AP-1 Signaling	1/21	0.0552216	0.395985	0	0	17.6367	51.0829	MAPK3
Hypothyrodism Associated Hyperprolactinemia	1/16	0.0423515	0.396124	0	0	23.1481	73.1887	MAPK3
FcIgER -> ELK-SRF Signaling	1/27	0.0704418	0.396178	0	0	13.7174	36.3919	MAPK3
Eicosanoids in Myeloid Cell Activation	1/23	0.060322	0.396237	0	0	16.1031	45.2183	MAPK3
Melatonin Effects on Circadian Cycle	1/26	0.0679219	0.39625	0	0	14.245	38.3105	MAPK3
Lipoxins and Resolvins in Inflammation Resolution	1/24	0.062862	0.396284	0	0	15.4321	42.6977	CX3CR1
AGTR1 -> ARRB1/ARRB2 Signaling	1/25	0.0653953	0.396286	0	0	14.8148	40.4045	MAPK3
NTRK -> FOXO/MYCN Signaling	1/17	0.0449392	0.396617	0	0	21.7865	67.5914	NTRK1
Myocyte Dysfunction in Hypoparathyroidism	1/18	0.04752	0.397	0	0	20.5761	62.6873	MAPK3
Genes with Susceptibility for Crohn's Disease and Ulcerative Colitis	1/19	0.050094	0.39729	0	0	19.4932	58.3597	GPX1
Aldosterone Synthesis Acute Regulation	1/27	0.0704418	0.397476	0	0	13.7174	36.3919	MAPK3
IL1R -> NF-kB Signaling	1/20	0.0526612	0.3975	0	0	18.5185	54.5162	MAPK3
Proteins with Altered Expression in Medulloblastoma	1/26	0.0679219	0.397597	0	0	14.245	38.3105	NTRK1
TRPM7/8 in Pancreatic Adenocarcinoma	1/21	0.0552216	0.397642	0	0	17.6367	51.0829	MAPK3
MTOR/TORC in Cancer Cell Motility and Invasion	1/25	0.0653953	0.397687	0	0	14.8148	40.4045	MAPK3
CRH Secretion Regulation	1/24	0.062862	0.397741	0	0	15.4321	42.6977	MAPK3
Aminoglycosides and Cisplatin Induced Ototoxicity (Mouse Model)	1/16	0.0423515	0.398289	0	0	23.1481	73.1887	MAPK3
Il17 Signaling Related Neutrophilia in Asthma	1/28	0.072955	0.398589	0	0	13.2275	34.6285	MAPK3
IL6R -> CEBP/ELK/SRF Signaling	1/17	0.0449392	0.398662	0	0	21.7865	67.5914	MAPK3
Reperfusion Injury in Myocardial ischemia	1/27	0.0704418	0.398784	0	0	13.7174	36.3919	SOD1
Myeloid Progenitor Cell -> GEMM - CFU Surface Expression Markers	1/18	0.04752	0.398936	0	0	20.5761	62.6873	CX3CR1
BDKRB1/2 -> Prostaglandin Generation	1/26	0.0679219	0.398954	0	0	14.245	38.3105	MAPK3
Proteins Involved in Pulmonary Hypertension	2/165	0.0732745	0.399068	0	0	4.48934	11.7331	CX3CR1;ADORA2A
Proteins Involved in Sleep Disorders	1/25	0.0653953	0.399097	0	0	14.8148	40.4045	ADORA2A
EctodysplasinR -> AP-1 Signaling	1/19	0.050094	0.399129	0	0	19.4932	58.3597	MAPK3
Proteins Involved in Autistic Disorder	1/24	0.062862	0.399209	0	0	15.4321	42.6977	DRD2
BMP2 and Canonical WNT Signaling in Pulmonary Artery Endothelial Cells	1/20	0.0526612	0.399251	0	0	18.5185	54.5162	MAPK3
MTHFR Activity Regulation	1/21	0.0552216	0.399312	0	0	17.6367	51.0829	SOD1
Prostate Cancer	2/123	0.0436211	0.399319	0	0	6.02228	18.8631	MET;MAPK3
FLT3/KIT/MLL Signaling in Leukemia	1/29	0.0754615	0.399598	0	0	12.7714	33.003	HRAS
TNFRSF1A -> AP-1/ATF/TP53 Signaling	1/28	0.072955	0.399858	0	0	13.2275	34.6285	MAPK3
Proteins with Altered Expression in Psoriasis	1/27	0.0704418	0.4001	0	0	13.7174	36.3919	MAPK3
Eat me Signal: Apoptotic Cell Initiates Phagocytosis	1/25	0.0653953	0.400517	0	0	14.8148	40.4045	LRP1
Proteins Involved in Hepatocellular Carcinoma	2/130	0.048174	0.400519	0	0	5.69801	17.2817	HRAS;MET
AGER -> CREB/SP1 Signaling	1/17	0.0449392	0.400727	0	0	21.7865	67.5914	MAPK3
TNFRSF1A -> CREB/ELK-SRF Signaling	1/29	0.0754615	0.400831	0	0	12.7714	33.003	MAPK3
Oxidized LDL/OLR1 Activates Cell Proliferation in Cancer	1/18	0.04752	0.400892	0	0	20.5761	62.6873	MAPK3
Exocytosis: Vesicle Docking	1/19	0.050094	0.400985	0	0	19.4932	58.3597	SNAP25
RET1 Mutation in Hyperparathyroidism	1/21	0.0552216	0.400997	0	0	17.6367	51.0829	MAPK3
Amyloid beta and APP Intracellular Transport in Alzheimer Disease	1/20	0.0526612	0.401018	0	0	18.5185	54.5162	LRP1
BMP/TGF-beta Signaling Impairment in Pulmonary Hypertension	1/28	0.072955	0.401136	0	0	13.2275	34.6285	LRP1
ADRA2C/ADRB2 -> Vasoconstriction	1/25	0.0653953	0.401948	0	0	14.8148	40.4045	MAPK3
Dystrophin Glycoprotein Complex Signaling in Muscular Dystrophies	1/29	0.0754615	0.402072	0	0	12.7714	33.003	SOD1
ERBB2/3 -> EP300/ETS/ETV/SP1 Signaling	1/28	0.072955	0.402422	0	0	13.2275	34.6285	MAPK3
GALR1/2/3 -> POMC/NPY Production	1/21	0.0552216	0.402696	0	0	17.6367	51.0829	MAPK3
Exocytosis: Vesicle Priming	1/20	0.0526612	0.4028	0	0	18.5185	54.5162	SNAP25
PTGIR -> IL6 Production	1/17	0.0449392	0.402814	0	0	21.7865	67.5914	MAPK3
Genes with Mutations in Cancer Metabolic Reprogramming	1/19	0.050094	0.402859	0	0	19.4932	58.3597	HRAS
Extracellular Matrix Turnover	1/18	0.04752	0.402867	0	0	20.5761	62.6873	LRP1
CD4+ T-Cell Death in HIV	1/29	0.0754615	0.403321	0	0	12.7714	33.003	MAPK3
Androgen Receptor non-Genomic Signaling	1/28	0.072955	0.403716	0	0	13.2275	34.6285	MAPK3
Neuroblastoma	2/131	0.0488381	0.404088	0	0	5.65451	17.0723	NTRK1;MAPK3
Dopamine Synthesis and Release	1/21	0.0552216	0.40441	0	0	17.6367	51.0829	DRD2
GDNF -> HSF1 Signaling	1/29	0.0754615	0.404577	0	0	12.7714	33.003	MAPK3
POMC Secretion in adenohypophysis	1/20	0.0526612	0.404598	0	0	18.5185	54.5162	CAMK2B
ANGPT/TEK Stimulates Endothelial Cell Migration in Cancer	1/19	0.050094	0.40475	0	0	19.4932	58.3597	MAPK3
PTGER1/4 -> Vascular Motility	1/18	0.04752	0.404861	0	0	20.5761	62.6873	MAPK3
NTRK1/2/3 -> Acetylcholine Production	1/17	0.0449392	0.404923	0	0	21.7865	67.5914	NTRK1
Proteins with Altered Expression in Ovarian Cancer	1/28	0.072955	0.405018	0	0	13.2275	34.6285	MET
CD8+ T-Cell Action Impairment in HIV Type 1 Infection	1/30	0.0779614	0.405352	0	0	12.3457	31.5005	MAPK3
SOD1 Mutation	1/29	0.0754615	0.405841	0	0	12.7714	33.003	SOD1
P2RY11/13/14 -> IL8/10 Production	1/20	0.0526612	0.406412	0	0	18.5185	54.5162	MAPK3
Adherens Junction Assembly (Cadherins)	1/30	0.0779614	0.40658	0	0	12.3457	31.5005	MET
Luteinizing Hormone in Oocyte Meiotic Resumption	1/19	0.050094	0.40666	0	0	19.4932	58.3597	MAPK3
HTR7 -> IL6 Production	1/18	0.04752	0.406876	0	0	20.5761	62.6873	MAPK3
Find me Signal: Apoptotic Cell Attracts Phagocyte	1/17	0.0449392	0.407054	0	0	21.7865	67.5914	CX3CR1
HTR1 -> IL6 Production	1/29	0.0754615	0.407114	0	0	12.7714	33.003	MAPK3
Proteins Involved in Chronic Obstructive Pulmonary Disease	2/170	0.0771455	0.407262	0	0	4.3573	11.1637	NTRK1;ADORA2A
Thrombopoietin Receptors Signaling in Platelet Maturation	1/30	0.0779614	0.407816	0	0	12.3457	31.5005	MAPK3
OPRK -> Pain Perception	1/20	0.0526612	0.408243	0	0	18.5185	54.5162	MAPK3
Eat me Signal: Apoptotic Cell Induces Phagocytosis	1/29	0.0754615	0.408394	0	0	12.7714	33.003	LRP1
Leukotriene Effect on Airway Smooth Muscle Response	1/19	0.050094	0.408587	0	0	19.4932	58.3597	MAPK3
RAGE/AGER and S100 Proteins in Cardiovascular Injury	1/30	0.0779614	0.40906	0	0	12.3457	31.5005	HRAS
CHRNA7 -> NOS1 Production	1/17	0.0449392	0.409208	0	0	21.7865	67.5914	MAPK3
Osteoblast Function Decline in Osteoporosis	1/31	0.0804546	0.409652	0	0	11.9474	30.1083	MAPK3
CHRM1 -> IL2 Production	1/29	0.0754615	0.409682	0	0	12.7714	33.003	MAPK3
Proteins Involved in Vasospasm	1/20	0.0526612	0.41009	0	0	18.5185	54.5162	SOD1
Ovulation Block	1/32	0.0829412	0.410178	0	0	11.5741	28.8151	MAPK3
ADRA1A -> IL6 Production	1/30	0.0779614	0.410311	0	0	12.3457	31.5005	MAPK3
DRD1/5 Expression Targets	1/19	0.050094	0.410533	0	0	19.4932	58.3597	MAPK3
GNRH Signaling Impairment in Hypogonadotrophic Hypogonadism	1/31	0.0804546	0.410868	0	0	11.9474	30.1083	MAPK3
FOXO1 and SREBP-1C Role in beta-Cell Suppression (Rodent Model)	1/32	0.0829412	0.41136	0	0	11.5741	28.8151	MAPK3
Proteins Involved in Diabetic Nephropathy	2/175	0.0810803	0.41162	0	0	4.2328	10.6341	MAPK3;SOD1
HTR5 -> TNF Production	1/20	0.0526612	0.411954	0	0	18.5185	54.5162	MAPK3
AngiopoietinR -> AP-1 Signaling	1/31	0.0804546	0.412091	0	0	11.9474	30.1083	MAPK3
ADRA1 -> Vasoconstriction	1/19	0.050094	0.412497	0	0	19.4932	58.3597	MAPK3
Coagulation Factors and PAR1/2 Receptors (F2R/F2RL1) in Endometriosis	1/32	0.0829412	0.412549	0	0	11.5741	28.8151	MAPK3
Aldosterone Synthesis Chronic Regulation	1/31	0.0804546	0.413321	0	0	11.9474	30.1083	MAPK3
Estrogens/ESR1 non-Genomic Signaling	1/32	0.0829412	0.413745	0	0	11.5741	28.8151	MAPK3
Proteins Involved in Hyperprolactinemia	1/20	0.0526612	0.413835	0	0	18.5185	54.5162	DRD2
Overt Hypothyroidism, Primary	1/33	0.0854213	0.414113	0	0	11.2233	27.6112	MAPK3
Vascular Endothelial Cell Activation by NO	1/31	0.0804546	0.414558	0	0	11.9474	30.1083	SOD1
Apoptosis Block in Acute Myeloid Leukemia Cell	1/32	0.0829412	0.414947	0	0	11.5741	28.8151	HRAS
IGF1 Role in Muscle Hypertrophy	1/33	0.0854213	0.415282	0	0	11.2233	27.6112	MAPK3
Macrophage M2-Related Phagocytosis	1/31	0.0804546	0.415803	0	0	11.9474	30.1083	MAPK3
ROS in Triggering Vascular Inflammation	1/32	0.0829412	0.416157	0	0	11.5741	28.8151	SOD1
T-Cell Receptor -> AP-1 Signaling	1/33	0.0854213	0.416459	0	0	11.2233	27.6112	MAPK3
Proteins Involved in Prolactinoma	1/31	0.0804546	0.417055	0	0	11.9474	30.1083	DRD2
Exocytosis: Vesicle Tethering	1/32	0.0829412	0.417374	0	0	11.5741	28.8151	SNAP25
Dentin Formation Disruption	1/33	0.0854213	0.417642	0	0	11.2233	27.6112	MAPK3
Sertoli Cells Dysfunction Causes Male Infertility	1/32	0.0829412	0.418598	0	0	11.5741	28.8151	MAPK3
EphrinB -> MAPK/JUN/FOS Signaling	1/33	0.0854213	0.418832	0	0	11.2233	27.6112	MAPK3
OipA Signaling in Helicobacter Pylori Infection	1/34	0.0878947	0.419022	0	0	10.8932	26.4882	MAPK3
Insulin Influence on Protein Synthesis	1/32	0.0829412	0.419829	0	0	11.5741	28.8151	MAPK3
Thyroid Stimulating Hormone (TSH) Resistance in Congenital Hypothyroidism	1/33	0.0854213	0.420029	0	0	11.2233	27.6112	MAPK3
NGFR -> AP-1/CEBPB/CREB/ELK/SRF/TP53 Signaling	1/34	0.0878947	0.420186	0	0	10.8932	26.4882	MAPK3
Hypothalamic-Pituitary-Adrenal Axis in Acute Phase Response	1/33	0.0854213	0.421232	0	0	11.2233	27.6112	MAPK3
CCR5 Signaling in Macrophages	1/34	0.0878947	0.421356	0	0	10.8932	26.4882	MAPK3
Natural Killer Cell Activation through ITSM-Containing Receptors	1/34	0.0878947	0.422533	0	0	10.8932	26.4882	MAPK3
Neurotrophic Factor Deprivation in Retinal Ganglion Cell Death	1/35	0.0903616	0.422588	0	0	10.582	25.4385	NTRK1
Insulin Synthesis in beta-Cell	1/34	0.0878947	0.423717	0	0	10.8932	26.4882	MAPK3
IL22 Induces Keratinocyte Proliferation in Psoriasis	1/35	0.0903616	0.423739	0	0	10.582	25.4385	MAPK3
Huntingtin Gene Mutation in Striatal Neuron	1/35	0.0903616	0.424897	0	0	10.582	25.4385	DRD2
Proteins Involved in Acute Myeloid Leukemia	1/34	0.0878947	0.424907	0	0	10.8932	26.4882	HRAS
Estrogen Effects on Pregnancy Gingivitis	1/36	0.0928219	0.425991	0	0	10.2881	24.4555	MAPK3
V(D)J Recombination Activation	1/35	0.0903616	0.426061	0	0	10.582	25.4385	MAPK3
Donohue Syndrome Progression (Hypothesis)	1/36	0.0928219	0.42713	0	0	10.2881	24.4555	MAPK3
Thyroid Stimulating Hormone (TSH) Secretion in Overt Hypothyroidism	1/35	0.0903616	0.427232	0	0	10.582	25.4385	MAPK3
Lysophosphatidic Acid/LPARs Signaling	1/36	0.0928219	0.428275	0	0	10.2881	24.4555	MAPK3
Natural Killer Cell Activation through C-Type Lectin-like Receptors	1/35	0.0903616	0.428408	0	0	10.582	25.4385	MAPK3
CD8+ Naive T-cell -> CD4+ Naive T-cell Surface Expression Markers	1/36	0.0928219	0.429426	0	0	10.2881	24.4555	CD38
GFs/TNF -> Ion Channels	1/35	0.0903616	0.429592	0	0	10.582	25.4385	NTRK1
Thyroid Hormones Common non-Genomic Effects in Hyperthyroidism	1/36	0.0928219	0.430584	0	0	10.2881	24.4555	MAPK3
Necrosis	1/36	0.0928219	0.431747	0	0	10.2881	24.4555	SOD1
VEGFR -> ATF/CREB/ELK-SRF Signaling	1/37	0.0952757	0.432637	0	0	10.01	23.5333	MAPK3
Lipoxin A4/FPR2-Related Neutrophil Depression	1/36	0.0928219	0.432917	0	0	10.2881	24.4555	MAPK3
PDGFR -> AP-1/MYC Signaling	1/37	0.0952757	0.433782	0	0	10.01	23.5333	MAPK3
Contraction Due Vasospasm	1/37	0.0952757	0.434932	0	0	10.01	23.5333	MAPK3
ERK5/MAPK7 Signaling	1/37	0.0952757	0.436089	0	0	10.01	23.5333	NTRK1
EDN, NRG, NRTN, and GDNF/RET Signaling in Hirschsprung Disease	1/38	0.097723	0.437972	0	0	9.74659	22.6668	MAPK3
Hair Follicle Keratinocyte Apoptosis	1/39	0.100164	0.438631	0	0	9.49668	21.8514	MAPK3
Dedifferentiation and Metastatic Progression in Melanoma	1/38	0.097723	0.439116	0	0	9.74659	22.6668	MET
TNFR -> AP-1/ATF/TP53 Signaling	1/39	0.100164	0.43975	0	0	9.49668	21.8514	MAPK3
Hematopoietic Cell Lineage: B-cell	1/38	0.097723	0.440265	0	0	9.74659	22.6668	CD38
Cell Cycle Dysregulation in Melanoma	1/39	0.100164	0.440874	0	0	9.49668	21.8514	MAPK3
TNF and IL1B Induce Metalloproteinase Synthesis in Osteoarthritis	1/38	0.097723	0.441421	0	0	9.74659	22.6668	MAPK3
Cardiovascular Effects in Hyperthyroidism	1/39	0.100164	0.442005	0	0	9.49668	21.8514	ADCY5
Interstitial Fibroblasts in Pyelonephritis	1/40	0.102598	0.442534	0	0	9.25926	21.0827	MAPK3
Mineralcorticoids Secretion Regulation	1/38	0.097723	0.442582	0	0	9.74659	22.6668	MAPK3
Apoptosis Block in Melanoma Cell	1/39	0.100164	0.443141	0	0	9.49668	21.8514	MAPK3
IL1 Receptor Antagonist (IL1RN) Deficiency (DIRA)	1/40	0.102598	0.443646	0	0	9.25926	21.0827	MAPK3
VEGFA in Neovascular Glaucoma	1/39	0.100164	0.444283	0	0	9.49668	21.8514	MAPK3
TNFR -> CREB/ELK-SRF Signaling	1/40	0.102598	0.444764	0	0	9.25926	21.0827	MAPK3
Peripheral Tolerance to Autoantigens Recession in Diabetes Mellitus Type 1	1/41	0.105026	0.445196	0	0	9.03342	20.3573	MAPK3
TRPM4/6/7/8 Signaling in Arterial Hypertension (Hypothesis)	1/39	0.100164	0.445431	0	0	9.49668	21.8514	MAPK3
SIRT1 Signaling in Aging	1/40	0.102598	0.445887	0	0	9.25926	21.0827	CD38
Mesangial Cell Dysfunction in Glomerulonephritis	1/41	0.105026	0.446295	0	0	9.03342	20.3573	MAPK3
Proteins Involved in Myocarditis	2/207	0.107626	0.446324	0	0	3.57846	7.97671	GPX1;MAPK3
PTPN22 Role in Rheumatoid Arthritis	1/39	0.100164	0.446585	0	0	9.49668	21.8514	MAPK3
Osteoclast Activation in Postmenopause	1/42	0.107447	0.446659	0	0	8.81834	19.6716	MAPK3
Proteins Involved in Noise-Induced Hearing Loss	1/40	0.102598	0.447016	0	0	9.25926	21.0827	SOD1
IL17 Signaling in Psoriasis	1/41	0.105026	0.4474	0	0	9.03342	20.3573	MAPK3
Cowden Syndrome	1/42	0.107447	0.44774	0	0	8.81834	19.6716	MAPK3
CNR1/2 -> IL1B/2/4/6/10 Production	1/39	0.100164	0.447745	0	0	9.49668	21.8514	MAPK3
EDNRA/B -> Vascular Motility	1/40	0.102598	0.44815	0	0	9.25926	21.0827	MAPK3
EGFR/ERBB2 -> TP53 Signaling	1/41	0.105026	0.44851	0	0	9.03342	20.3573	MAPK3
EGFR -> AP-1/ATF2 Signaling	1/42	0.107447	0.448827	0	0	8.81834	19.6716	MAPK3
Astrocytoma	1/41	0.105026	0.449626	0	0	9.03342	20.3573	MAPK3
Airway Smooth Muscle Cell Contraction	1/42	0.107447	0.449919	0	0	8.81834	19.6716	CD38
MicroRNAs Role in Melanoma	1/43	0.109862	0.450174	0	0	8.61326	19.0226	MET
Eosinophil Activation and Degranulation in Asthma	1/44	0.112271	0.450392	0	0	8.41751	18.4078	MAPK3
Steroidogenesis Impairement in Polycystic Ovary Syndrome	1/41	0.105026	0.450747	0	0	9.03342	20.3573	MAPK3
HIF1A in Vasculogenic Mimicry of Cancer	1/42	0.107447	0.451017	0	0	8.81834	19.6716	MAPK3
IGF1R/AKT Signaling in Breast Cancer	1/43	0.109862	0.451248	0	0	8.61326	19.0226	MAPK3
CagA Phosphorylation Independent Signaling	1/44	0.112271	0.451444	0	0	8.41751	18.4078	MET
Circadian Clock Genes in Suprachiasmatic Nuclei Neurons	1/41	0.105026	0.451874	0	0	9.03342	20.3573	MAPK3
Clozapine Induced Granulocytopenia	1/42	0.107447	0.452119	0	0	8.81834	19.6716	MAPK3
IgE Induces Airway Smooth Muscle Cell Proliferation	1/43	0.109862	0.452328	0	0	8.61326	19.0226	MAPK3
Proteins Involved in Hearing Loss	2/209	0.109356	0.452407	0	0	3.54421	7.84387	GPX1;SOD1
HRAS Signaling	1/44	0.112271	0.452501	0	0	8.41751	18.4078	HRAS
Serotonin Receptors Signaling	1/42	0.107447	0.453227	0	0	8.81834	19.6716	MAPK3
VEGFR -> AP-1/CREB/MYC Signaling	1/43	0.109862	0.453412	0	0	8.61326	19.0226	MAPK3
FOXO1 Signaling	1/44	0.112271	0.453563	0	0	8.41751	18.4078	MAPK3
Sebocyte Proliferation in Acne Vulgaris	1/42	0.107447	0.454341	0	0	8.81834	19.6716	MAPK3
beta-Cell Mass Regulation	1/44	0.112271	0.454631	0	0	8.41751	18.4078	MET
Alveolar Macrophage Negative Regulation Declined in COPD	1/44	0.112271	0.455703	0	0	8.41751	18.4078	MAPK3
Treg Cells Promote Immunosuppression in Cancer Immune Escape	1/44	0.112271	0.45678	0	0	8.41751	18.4078	MAPK3
Adiponectin Synthesis Declines in Insulin Resistance	1/44	0.112271	0.457863	0	0	8.41751	18.4078	MAPK3
MC1R in anti-Inflammatory Signaling	1/44	0.112271	0.45895	0	0	8.41751	18.4078	MAPK3
Hemapoietic Stem Cell -> Lymphoid Multipotent Progenitor Surface Expression Markers	1/45	0.114673	0.458958	0	0	8.23045	17.8245	CD38
MERTK Signaling	1/46	0.117069	0.464229	0	0	8.05153	17.2705	MAPK3
Toll-like Receptors in beta-Cell	1/46	0.117069	0.465301	0	0	8.05153	17.2705	MAPK3
Keratinocyte Activation in Psoriatic Arthritis	1/47	0.119458	0.466185	0	0	7.88022	16.7438	MAPK3
Oncogene Induced Cellular Senescence	1/46	0.117069	0.466378	0	0	8.05153	17.2705	HRAS
IL6/IGF1/VEGFA Signaling in Multiple Myeloma	1/47	0.119458	0.467244	0	0	7.88022	16.7438	MAPK3
Subepithelial Fibroblasts in Middle Ear Cholesteatoma	1/46	0.117069	0.46746	0	0	8.05153	17.2705	MAPK3
FibronectinR -> AP-1/ELK/SRF/SREBF Signaling	1/47	0.119458	0.468308	0	0	7.88022	16.7438	MAPK3
AXL Receptor Tyrosine Kinase Signaling	1/47	0.119458	0.469378	0	0	7.88022	16.7438	MAPK3
BSG (CD147) in Cancer Cells Motility, Invasion and Survival	1/47	0.119458	0.470452	0	0	7.88022	16.7438	MAPK3
Tubular Cell Dysfunction in Progressive Diabetic Nephropathy	1/47	0.119458	0.471531	0	0	7.88022	16.7438	MAPK3
IL1B Expression Targets -> Nociception	1/47	0.119458	0.472615	0	0	7.88022	16.7438	MAPK3
Vascular Smooth Muscle Cell/Pericyte Migration and Proliferation	1/48	0.121841	0.473338	0	0	7.71605	16.2426	MAPK3
T-Cell Cytotoxic Response in Ulcerative Colitis	1/48	0.121841	0.474409	0	0	7.71605	16.2426	MAPK3
Polycystins Mutation Effects in Cystic Kidney Disease	1/49	0.124218	0.476123	0	0	7.55858	15.7651	MAPK3
Podocyte Dysfunction in Glomerulonephritis	1/50	0.126588	0.476714	0	0	7.40741	15.3097	ACTN4
Mesangial Cell Dysfunction in Diabetic Nephropathy	1/49	0.124218	0.477185	0	0	7.55858	15.7651	MAPK3
Plasmin Role in Glomerulonephritis	1/50	0.126588	0.47776	0	0	7.40741	15.3097	MAPK3
EGFR -> AP-1/CREB/ELK/SRF/MYC Signaling	1/49	0.124218	0.478253	0	0	7.55858	15.7651	MAPK3
non-Suppressive Treg-Cell in Diabetes Mellitus Type 1	1/50	0.126588	0.47881	0	0	7.40741	15.3097	MAPK3
CDH2 Activation Promotes Cancer Cell Migration and Survival	1/49	0.124218	0.479325	0	0	7.55858	15.7651	MAPK3
Natural Killer Cell in Diabetes Mellitus Type 1	1/50	0.126588	0.479865	0	0	7.40741	15.3097	MAPK3
Inflammatory Reaction in Acne Vulgaris	1/51	0.128952	0.480362	0	0	7.26216	14.8752	MAPK3
Skin Aging	1/49	0.124218	0.480402	0	0	7.55858	15.7651	MAPK3
Eosinophil Survival in Asthma	1/50	0.126588	0.480924	0	0	7.40741	15.3097	MAPK3
ESR1 Signaling in Breast Cancer	1/51	0.128952	0.481404	0	0	7.26216	14.8752	MAPK3
Proteins Involved in Systemic Scleroderma	1/49	0.124218	0.481484	0	0	7.55858	15.7651	MAPK3
Potassium Flux Regulation	1/50	0.126588	0.481988	0	0	7.40741	15.3097	DRD2
ROS in Angiotensin Mediated Cardiovascular Remodeling and Hypertrophy	1/51	0.128952	0.48245	0	0	7.26216	14.8752	SOD1
Neutrophil Activation via FCGR3B	1/50	0.126588	0.483057	0	0	7.40741	15.3097	MAPK3
Vascular Endothelial Cell Activation by Growth Factors	1/51	0.128952	0.483501	0	0	7.26216	14.8752	MAPK3
Proteins Involved in Endometrial Cancer	1/50	0.126588	0.48413	0	0	7.40741	15.3097	MAPK3
Macrophage M1 Lineage	1/51	0.128952	0.484557	0	0	7.26216	14.8752	MAPK3
Polycystic Ovary Syndrome	1/52	0.13131	0.485989	0	0	7.12251	14.4601	MAPK3
EGFR Signaling	1/52	0.13131	0.487037	0	0	7.12251	14.4601	MAPK3
Acute Cytotoxic CD8+T-Cell Response against Melanocytes	1/52	0.13131	0.488089	0	0	7.12251	14.4601	MAPK3
HPV E5 Regulates EDNRA and EGFR Signaling Pathway in Keratinocytes	1/53	0.133662	0.493631	0	0	6.98812	14.0632	MAPK3
Mast-Cells Activation in Atopic Dermatitis	1/54	0.136007	0.493815	0	0	6.85871	13.6835	MAPK3
ERBB/VEGFR/Akt Signaling in Breast Cancer	1/54	0.136007	0.494859	0	0	6.85871	13.6835	MAPK3
FGFR -> AP-1/CREB/CREBBP/ELK/SRF/MYC Signaling	1/54	0.136007	0.495908	0	0	6.85871	13.6835	MAPK3
Atopic Dermatitis Onset	1/54	0.136007	0.49696	0	0	6.85871	13.6835	MAPK3
Hepatic Stellate Cells in non-Alcoholic Fatty Liver Disease	1/55	0.138346	0.497065	0	0	6.73401	13.3198	MAPK3
T-Cell Receptor Signaling	1/54	0.136007	0.498018	0	0	6.85871	13.6835	MAPK3
Endothelial Cell Dysfunction in Glomerulonephritis	1/55	0.138346	0.498104	0	0	6.73401	13.3198	MAPK3
Proteins Involved in Melanoma	2/238	0.135217	0.498306	0	0	3.11236	6.22743	HRAS;MET
Insulin Signaling	1/54	0.136007	0.49908	0	0	6.85871	13.6835	MAPK3
Th2-Cell Function in Systemic Lupus Erythematosus	1/55	0.138346	0.499149	0	0	6.73401	13.3198	MAPK3
Catecholamines Secretion from Adrenal Gland	1/54	0.136007	0.500146	0	0	6.85871	13.6835	SNAP25
Th1-Cell Function in Systemic Lupus Erythematosus	1/55	0.138346	0.500197	0	0	6.73401	13.3198	MAPK3
Osteoclast Activation in Rheumatoid Arthritis	1/57	0.143006	0.50023	0	0	6.49773	12.6372	MAPK3
CFTR Facilitates Oxidative Stress in Airway Epithelium in CF	1/57	0.143006	0.501249	0	0	6.49773	12.6372	SOD1
Proteins Involved in Breast Cancer Related to IGF1R/Akt Signaling Pathway	1/55	0.138346	0.50125	0	0	6.73401	13.3198	MAPK3
Hyaluronic Acid, CD44 and HMMR in Cancer Cell Invasion and Survival	1/56	0.140679	0.50126	0	0	6.61376	12.9714	MAPK3
Angiogenesis in Endometriosis	1/57	0.143006	0.502271	0	0	6.49773	12.6372	MAPK3
T-Cell Independent B-Cell Activation	1/56	0.140679	0.5023	0	0	6.61376	12.9714	MAPK3
Vascular Endothelial Cell Activation by Blood Coagulation Factors	1/57	0.143006	0.503299	0	0	6.49773	12.6372	MAPK3
Neutrophil Chemotaxis	1/56	0.140679	0.503345	0	0	6.61376	12.9714	MAPK3
Osteoclast Activation in Gout	1/58	0.145326	0.504247	0	0	6.3857	12.3166	MAPK3
Th2-Cell Differentiation	1/57	0.143006	0.50433	0	0	6.49773	12.6372	MAPK3
Proteins Involved in B-Cell Chronic Lymphocytic Leukemia	1/56	0.140679	0.504393	0	0	6.61376	12.9714	CD38
VEGF Signaling	1/58	0.145326	0.505266	0	0	6.3857	12.3166	MAPK3
Treg-Cell Activation in Diabetes Mellitus	1/57	0.143006	0.505366	0	0	6.49773	12.6372	MAPK3
CD4+ T-Cell Function Decline in HIV	1/58	0.145326	0.506289	0	0	6.3857	12.3166	MAPK3
Th2-Cell Response in Asthma	1/57	0.143006	0.506405	0	0	6.49773	12.6372	MAPK3
Treg-Cell Differentiation	1/58	0.145326	0.507316	0	0	6.3857	12.3166	MAPK3
Th2-Cell Function in Ulcerative Colitis	1/57	0.143006	0.50745	0	0	6.49773	12.6372	MAPK3
Neutrophil Activation via Adherence on Endothelial Cells	1/57	0.143006	0.508498	0	0	6.49773	12.6372	MAPK3
Antigen-Presenting Cell Role in Asthma	1/59	0.147641	0.509197	0	0	6.27746	12.0086	MAPK3
Steroids Induced Cataract	1/59	0.147641	0.51022	0	0	6.27746	12.0086	MAPK3
Proteins Involved in Psoriasis	1/59	0.147641	0.511247	0	0	6.27746	12.0086	MAPK3
Toll-like Receptors in Sterile Inflammation	1/60	0.149949	0.512028	0	0	6.17284	11.7127	LRP1
Th2-Cells Function in Systemic Scleroderma	1/60	0.149949	0.513046	0	0	6.17284	11.7127	MAPK3
Proteins Involved in Multiple Myeloma	1/60	0.149949	0.514068	0	0	6.17284	11.7127	MET
Proteins Involved in Female Infertility	1/60	0.149949	0.515094	0	0	6.17284	11.7127	GPX1
Proliferative Diabetic Retinopathy	1/60	0.149949	0.516124	0	0	6.17284	11.7127	MAPK3
T-lymphoid precursor cell -> CD8+ Naive T-cell Surface Expression Markers	1/61	0.152251	0.516812	0	0	6.07165	11.4282	CD38
Proteins Involved in Endometriosis	2/256	0.151902	0.51767	0	0	2.89352	5.45289	DPYSL2;MET
Proteins Involved in Diffuse Large-B-Cell Lymphoma	1/61	0.152251	0.517833	0	0	6.07165	11.4282	MET
TGF-beta Signaling	1/62	0.154547	0.52152	0	0	5.97372	11.1545	MAPK3
Treg-Cell Function in Diabetes Mellitus Type 1	1/62	0.154547	0.522544	0	0	5.97372	11.1545	MAPK3
CD8+ T-Cell Activation	1/62	0.154547	0.523573	0	0	5.97372	11.1545	MAPK3
CD8+ T-Cell Response in Celiac Disease	1/63	0.156837	0.524108	0	0	5.87889	10.891	MAPK3
T-Cell Dependent B-Cell Activation	1/63	0.156837	0.525128	0	0	5.87889	10.891	MAPK3
TLR2 Signaling in Treg-Cell in Type 1 Diabetes (Animal Model)	1/63	0.156837	0.526152	0	0	5.87889	10.891	MAPK3
Neutrophil Degranulation via FPR1/IL8	1/64	0.15912	0.526627	0	0	5.78704	10.6371	MAPK3
Natural Killer Cell Activation through ITAM-Containing Receptors	1/63	0.156837	0.527179	0	0	5.87889	10.891	MAPK3
Cetuximab Resistance in Colorectal Cancer	1/64	0.15912	0.527642	0	0	5.78704	10.6371	MET
Proteins Involved in Hypothyroidism	1/63	0.156837	0.528211	0	0	5.87889	10.891	NTRK1
Th1-Cell Differentiation	1/64	0.15912	0.52866	0	0	5.78704	10.6371	MAPK3
Natural Killer T-Cell Roles in Diabetes Mellitus Type 1	1/65	0.161398	0.529078	0	0	5.69801	10.3925	MAPK3
anti-Inflammatory Function of Macrophage M2 Lineage	1/64	0.15912	0.529683	0	0	5.78704	10.6371	MAPK3
Clear Cell Endometrial Cancer and Papillary Serous Endometrial Cancer	1/65	0.161398	0.530088	0	0	5.69801	10.3925	MAPK3
Proteins Involved in Breast Cancer Related to ESR1 Signaling Pathway	1/64	0.15912	0.530709	0	0	5.78704	10.6371	MAPK3
Cardiomyocyte Hypertrophy	1/65	0.161398	0.531101	0	0	5.69801	10.3925	MAPK3
B-Cell Activation in Systemic Lupus Erythematosus	1/65	0.161398	0.532119	0	0	5.69801	10.3925	MAPK3
Natural Killer Cell Activation	1/65	0.161398	0.53314	0	0	5.69801	10.3925	MAPK3
Platelet Activation via Adhesion Molecules	1/66	0.16367	0.534488	0	0	5.61167	10.1566	MAPK3
Neutrophil Recruitment and Priming	1/66	0.16367	0.535505	0	0	5.61167	10.1566	MAPK3
Endothelial Cell Dysfunction in Pulmonary Hypertension	1/67	0.165935	0.539838	0	0	5.52792	9.92901	MAPK3
STAT3 and NFkB Activate Inflammation-Induced Tumorigenesis	1/67	0.165935	0.540861	0	0	5.52792	9.92901	MET
Metabolic Effects of Oncogenes and Tumor Suppressor in Cancer Cells	1/68	0.168195	0.543083	0	0	5.44662	9.70933	HRAS
T-Cell Maturation (Hypothesis)	1/68	0.168195	0.544104	0	0	5.44662	9.70933	MAPK3
Plasmin Effects in Inflammation	1/68	0.168195	0.545128	0	0	5.44662	9.70933	MAPK3
Proteins Involved in Medulloblastoma	1/68	0.168195	0.546157	0	0	5.44662	9.70933	MET
Osteoclast Activation in Multiple Myeloma	1/69	0.170448	0.548302	0	0	5.36769	9.49717	MAPK3
B-Cells Function in Systemic Scleroderma	1/69	0.170448	0.549329	0	0	5.36769	9.49717	MAPK3
Cholesteatoma	1/70	0.172696	0.554495	0	0	5.29101	9.29219	MAPK3
Humoral Immunity in Vitiligo	1/71	0.174937	0.559604	0	0	5.21648	9.09404	MAPK3
Cytokines Trigger Otitis Media	1/71	0.174937	0.560646	0	0	5.21648	9.09404	MAPK3
Glioma Stem Cell Program Activation	1/72	0.177173	0.562573	0	0	5.14403	8.90241	MET
Th1-Cells Activation and Proliferation in Atherosclerosis	1/72	0.177173	0.563613	0	0	5.14403	8.90241	MAPK3
Eosinophil Survival by Cytokine Signaling	1/72	0.177173	0.564657	0	0	5.14403	8.90241	MAPK3
Proteins Involved in Breast Cancer Related to ERBB2/VEGFR/Akt Signaling Pathway	1/72	0.177173	0.565704	0	0	5.14403	8.90241	MAPK3
TGFB Signaling activation by Blocking of Tumor Suppressors	1/73	0.179403	0.568604	0	0	5.07357	8.71701	MAPK3
B-Cell Acute Lymphoblastic Leukemia	1/74	0.181626	0.574594	0	0	5.00501	8.53756	MAPK3
Glioma Invasion Signaling	1/75	0.183844	0.57842	0	0	4.93827	8.36379	MET
Proteins Involved in Glioma	2/290	0.18442	0.579172	0	0	2.55428	4.31811	MET;MAPK3
Integrins in Cancer Cell Motility, Invasion and Survival	1/75	0.183844	0.579479	0	0	4.93827	8.36379	MAPK3
CXC Chemokine Receptor Signaling	1/75	0.183844	0.580543	0	0	4.93827	8.36379	MAPK3
Vitiligo	1/78	0.190462	0.597059	0	0	4.74834	7.87418	SOD1
Proplatelet Maturation	1/79	0.192657	0.601746	0	0	4.68823	7.7208	MAPK3
Th0-Cell Aberrant Activation in Systemic Lupus Erythematosus	1/79	0.192657	0.60284	0	0	4.68823	7.7208	MAPK3
TGFB Family in Epithelial to Mesenchymal Transition in Cancer	1/80	0.194845	0.607479	0	0	4.62963	7.57199	MAPK3
Acute Myeloid Leukemia	1/82	0.199205	0.618828	0	0	4.51671	7.28737	HRAS
Osteoarthritis	1/82	0.199205	0.619947	0	0	4.51671	7.28737	MAPK3
Proteins with Altered Expression in Cancer Metabolic Reprogramming	1/85	0.2057	0.637856	0	0	4.3573	6.89035	HRAS
Eosinophil Activation	1/87	0.210002	0.650025	0	0	4.25713	6.64384	MAPK3
Smooth Muscle Cell Dysfunction in Pulmonary Hypertension	1/88	0.212144	0.654302	0	0	4.20875	6.52562	MAPK3
CC Chemokine Receptor Signaling	1/88	0.212144	0.655477	0	0	4.20875	6.52562	MAPK3
Hypertrophic Cardiomyopathy	1/89	0.214281	0.65971	0	0	4.16146	6.4106	MAPK3
T-Cell Cytotoxic Response against Melanocytes in Vitiligo	1/90	0.216412	0.66508	0	0	4.11523	6.29865	MAPK3
CD4+T-Cell Response in Celiac Disease	1/91	0.218537	0.670414	0	0	4.07	6.18966	MAPK3
Endometrioid Endometrial Cancer	1/92	0.220657	0.674512	0	0	4.02576	6.08352	MAPK3
Proteins Involved in Astrocytoma	1/92	0.220657	0.675712	0	0	4.02576	6.08352	MET
ESR1/ERBB Positive Luminal Breast Cancer	1/93	0.222771	0.679767	0	0	3.98248	5.98014	MAPK3
Follicular Lymphoma	1/97	0.23117	0.704149	0	0	3.81825	5.59221	MAPK3
Proteins Involved in Colorectal Neoplasms	1/99	0.235337	0.715573	0	0	3.74111	5.41241	MET
T-Cell Acute Lymphoblastic Leukemia	1/103	0.243603	0.739402	0	0	3.59583	5.07808	MAPK3
Medulloblastoma	1/104	0.245656	0.74432	0	0	3.56125	4.99937	NTRK1
Endometrial Cancer	1/106	0.249745	0.752735	0	0	3.49406	4.84736	MAPK3
Proteins with Altered Expression in Cancer Metastases	1/106	0.249745	0.754055	0	0	3.49406	4.84736	MAPK3
Proteins Involved in Obesity	1/106	0.249745	0.755381	0	0	3.49406	4.84736	MAPK3
Cell Cycle Overiew	1/107	0.251782	0.757546	0	0	3.46141	4.77395	MAPK3
Breast Cancer	1/108	0.253813	0.762324	0	0	3.42936	4.70219	MAPK3
Proteins Involved in Glomerulonephritis	1/121	0.279729	0.8387	0	0	3.06091	3.8994	CX3CR1
Proteins Involved in Dilated Cardiomyopathy	1/167	0.364533	1	0	0	2.21779	2.23805	MAPK3
Proteins Involved in Atherosclerosis	1/200	0.419254	1	0	0	1.85185	1.60978	CX3CR1

## Sheet: B. WikiPathway human (SFARI)
WikiPathway enrichment of human orthologs of DEGs associated with autistic spectrum disorders in SFARI
Term	Overlap	P-value	Adjusted P-value	Old P-value	Old Adjusted P-value	Odds Ratio	Combined Score	Genes
Phosphodiesterases in neuronal function WP4222	5/53	3.08652e-07	0.000145684	0	0	34.9406	523.796	GRIN2A;ADORA2A;PPP1R1B;DRD2;ADCY5
Synaptic signaling pathways associated with autism spectrum disorder WP4539	4/50	9.96677e-06	0.00235216	0	0	29.6296	341.222	CAMK2B;GRIN2A;HRAS;MAPK3
Brain-Derived Neurotrophic Factor (BDNF) signaling pathway WP2380	5/144	4.29686e-05	0.0067604	0	0	12.8601	129.309	NTRK1;DPYSL2;HRAS;SYN1;MAPK3
Alzheimers Disease WP2059	4/83	7.44568e-05	0.0087859	0	0	17.8492	169.662	GRIN2A;LRP1;APBB1;MAPK3
GABA receptor Signaling WP4159	3/31	7.92692e-05	0.00748301	0	0	35.8423	338.447	GABRB2;GABRA3;AP2S1
Signaling of Hepatocyte Growth Factor Receptor WP313	3/34	0.000104925	0.00825411	0	0	32.6797	299.42	HRAS;MET;MAPK3
Ras Signaling WP4223	5/184	0.000136995	0.00923736	0	0	10.0644	89.5287	NTRK1;GRIN2A;HRAS;MET;MAPK3
Sleep regulation WP3591	3/38	0.000146794	0.00866086	0	0	29.2398	258.084	GRIN2A;ADORA2A;DRD2
Common Pathways Underlying Drug Addiction WP2636	3/42	0.000198244	0.0103968	0	0	26.455	225.556	GRIN2A;DRD2;MAPK3
Cytosine methylation WP3585	2/9	0.000254477	0.0120113	0	0	82.3045	681.177	MBD3;TET2
Rett syndrome causing genes WP4312	3/48	0.000295281	0.0126702	0	0	23.1481	188.139	GRIN2A;GABRA3;SCN1A
Synaptic Vesicle Pathway WP2267	3/51	0.000353501	0.0139044	0	0	21.7865	173.151	SNAP25;AP2S1;SYN1
MET in type 1 papillary renal cell carcinoma WP4205	3/59	0.000543487	0.0197328	0	0	18.8324	141.573	HRAS;MET;MAPK3
Non-genomic actions of 1,25 dihydroxyvitamin D3 WP4341	3/71	0.000933939	0.0314871	0	0	15.6495	109.172	CAMK2B;HRAS;MAPK3
Chemokine signaling pathway WP3929	4/164	0.00100174	0.0315215	0	0	9.03342	62.385	CX3CR1;HRAS;ADCY5;MAPK3
Inhibition of exosome biogenesis and secretion by Manumycin A in CRPC cells WP4301	2/18	0.00106481	0.031412	0	0	41.1523	281.685	HRAS;MAPK3
Serotonin Receptor 2 and ELK-SRF/GATA4 signaling WP732	2/20	0.00131775	0.036587	0	0	37.037	245.623	HRAS;MAPK3
Signaling Pathways in Glioblastoma WP2261	3/82	0.00141715	0.0371609	0	0	13.5501	88.8768	HRAS;MET;MAPK3
Nicotine Activity on Dopaminergic Neurons WP1602	2/21	0.00145395	0.0361191	0	0	35.2734	230.458	PPP1R1B;DRD2
ErbB Signaling Pathway WP673	3/91	0.00191107	0.0451012	0	0	12.21	76.4358	CAMK2B;HRAS;MAPK3
Focal Adhesion WP306	4/198	0.00200208	0.0449992	0	0	7.48223	46.4913	ACTN4;HRAS;MET;MAPK3
MAPK Cascade WP422	2/29	0.00277238	0.0545235	0	0	25.5428	150.397	HRAS;MAPK3
PDGFR-beta pathway WP3972	2/29	0.00277238	0.0568941	0	0	25.5428	150.397	HRAS;MAPK3
Cannabinoid receptor signaling WP3869	2/29	0.00277238	0.0594802	0	0	25.5428	150.397	ADORA2A;MAPK3
Extracellular vesicle-mediated signaling in recipient cells WP2870	2/30	0.00296529	0.0559846	0	0	24.6914	143.723	HRAS;MET
Monoamine Transport WP727	2/32	0.00336946	0.0611686	0	0	23.1481	131.782	ADORA2A;SYN1
Oxidative Stress WP408	2/33	0.00358066	0.0603597	0	0	22.4467	126.424	GPX1;SOD1
Alpha 6 Beta 4 signaling pathway WP244	2/33	0.00358066	0.0625952	0	0	22.4467	126.424	HRAS;MAPK3
Hippo-Merlin Signaling Dysregulation WP4541	3/120	0.00418144	0.0680566	0	0	9.25926	50.7139	NTRK1;HRAS;MET
Amyotrophic lateral sclerosis (ALS) WP2447	2/38	0.0047265	0.0743637	0	0	19.4932	104.378	GPX1;SOD1
PDGF Pathway WP2526	2/39	0.00497341	0.0757242	0	0	18.9934	100.734	HRAS;MAPK3
IL-2 Signaling Pathway WP49	2/42	0.00574903	0.0847982	0	0	17.6367	90.9828	HRAS;MAPK3
Interleukin-11 Signaling Pathway WP2332	2/44	0.00629487	0.0900358	0	0	16.835	85.3202	HRAS;MAPK3
NO/cGMP/PKG mediated Neuroprotection WP4008	2/47	0.00715614	0.0993441	0	0	15.7604	77.8532	CAMK2B;GRIN2A
IL-3 Signaling Pathway WP286	2/49	0.0077583	0.104626	0	0	15.1172	73.4542	HRAS;MAPK3
One carbon metabolism and related pathways WP3940	2/52	0.00870286	0.114104	0	0	14.245	67.5798	GPX1;SOD1
Insulin Signaling WP481	3/160	0.00924814	0.117976	0	0	6.94444	32.5231	SNAP25;HRAS;MAPK3
TGF-beta Receptor Signaling WP560	2/54	0.00935977	0.116258	0	0	13.7174	64.0787	HRAS;MAPK3
Kit receptor signaling pathway WP304	2/59	0.0110955	0.134284	0	0	12.5549	56.5125	HRAS;MAPK3
Endometrial cancer WP4155	2/63	0.0125781	0.148422	0	0	11.7578	51.4497	HRAS;MAPK3
PI3K-Akt Signaling Pathway WP4172	4/340	0.0133169	0.153306	0	0	4.3573	18.818	NTRK1;HRAS;MET;MAPK3
Oncostatin M Signaling Pathway WP2374	2/65	0.0133502	0.150031	0	0	11.396	49.1877	HRAS;MAPK3
TCA Cycle Nutrient Utilization and Invasiveness of Ovarian Cancer WP2868	1/5	0.0134285	0.147401	0	0	74.0741	319.287	MAPK3
Human Thyroid Stimulating Hormone (TSH) signaling pathway WP2032	2/66	0.0137438	0.135147	0	0	11.2233	48.1164	HRAS;MAPK3
Folate Metabolism WP176	2/66	0.0137438	0.138023	0	0	11.2233	48.1164	GPX1;SOD1
Association Between Physico-Chemical Features and Toxicity Associated Pathways WP3680	2/66	0.0137438	0.141023	0	0	11.2233	48.1164	GPX1;SOD1
Non-small cell lung cancer WP4255	2/66	0.0137438	0.144157	0	0	11.2233	48.1164	HRAS;MAPK3
AGE/RAGE pathway WP2324	2/66	0.0137438	0.147433	0	0	11.2233	48.1164	MAPK3;SOD1
RAC1/PAK1/p38/MMP2 Pathway WP3303	2/68	0.014546	0.140117	0	0	10.8932	46.0832	HRAS;MAPK3
Primary Focal Segmental Glomerulosclerosis FSGS WP2572	2/72	0.0162097	0.153019	0	0	10.2881	42.4089	CAMK2B;ACTN4
Circadian rhythm related genes WP3594	3/201	0.0170389	0.157693	0	0	5.52792	22.5111	NTRK1;ADORA2A;DRD2
Leptin signaling pathway WP2034	2/76	0.0179508	0.159864	0	0	9.74659	39.1825	HRAS;MAPK3
Prolactin Signaling Pathway WP2037	2/76	0.0179508	0.162938	0	0	9.74659	39.1825	HRAS;MAPK3
Selenium Micronutrient Network WP15	2/86	0.0226308	0.19781	0	0	8.61326	32.6308	GPX1;SOD1
T-Cell antigen Receptor (TCR) Signaling Pathway WP69	2/90	0.0246292	0.211363	0	0	8.23045	30.4841	HRAS;MAPK3
TNF alpha Signaling Pathway WP231	2/92	0.0256545	0.216231	0	0	8.05153	29.493	HRAS;MAPK3
G Protein Signaling Pathways WP35	2/93	0.0261737	0.216736	0	0	7.96495	29.0163	HRAS;ADCY5
MAPK Signaling Pathway WP382	3/246	0.0287892	0.234284	0	0	4.51671	16.0242	NTRK1;HRAS;MAPK3
Pathways Regulating Hippo Signaling WP4540	2/98	0.0288329	0.230664	0	0	7.55858	26.8045	NTRK1;MET
Nucleotide GPCRs WP80	1/11	0.0293093	0.230567	0	0	33.67	118.85	ADORA2A
RalA downstream regulated genes WP2290	1/12	0.0319316	0.243092	0	0	30.8642	106.301	HRAS
Bile Acids synthesis and enterohepatic circulation WP4389	1/12	0.0319316	0.247077	0	0	30.8642	106.301	MAPK3
GPCRs, Class A Rhodopsin-like WP455	3/257	0.0321756	0.241061	0	0	4.32339	14.8575	CX3CR1;ADORA2A;DRD2
Thermogenesis WP4321	2/108	0.0344591	0.254136	0	0	6.85871	23.1	HRAS;ADCY5
MFAP5-mediated ovarian cancer cell motility and invasiveness WP3301	1/13	0.034547	0.239797	0	0	28.49	95.8814	MAPK3
Dopamine metabolism WP2436	1/13	0.034547	0.243376	0	0	28.49	95.8814	SOD1
Cell-type Dependent Selectivity of CCK2R Signaling WP3679	1/13	0.034547	0.247063	0	0	28.49	95.8814	CD38
Osteopontin Signaling WP1434	1/13	0.034547	0.250864	0	0	28.49	95.8814	MAPK3
ERK Pathway in Huntington's Disease WP3853	1/14	0.0371554	0.254164	0	0	26.455	87.1071	HRAS
NAD+ metabolism WP3644	1/16	0.0423515	0.28557	0	0	23.1481	73.1887	CD38
IL-9 Signaling Pathway WP22	1/17	0.0449392	0.290566	0	0	21.7865	67.5914	MAPK3
Serotonin and anxiety WP3947	1/17	0.0449392	0.294601	0	0	21.7865	67.5914	CAMK2B
Regulation of Wnt/B-catenin Signaling by Small Molecule Compounds WP3664	1/17	0.0449392	0.298751	0	0	21.7865	67.5914	LRP1
mRNA Processing WP411	2/126	0.0455516	0.290545	0	0	5.87889	18.1594	CELF4;SF3B1
Ebola Virus Pathway on Host WP4217	2/129	0.0475132	0.299017	0	0	5.74218	17.495	ACTN4;MAPK3
TGF-B Signaling in Thyroid Cells for Epithelial-Mesenchymal Transition WP3859	1/18	0.04752	0.291292	0	0	20.5761	62.6873	MAPK3
4-hydroxytamoxifen, Dexamethasone, and Retinoic Acids Regulation of p27 Expression WP3879	1/18	0.04752	0.295124	0	0	20.5761	62.6873	MAPK3
Focal Adhesion-PI3K-Akt-mTOR-signaling pathway WP3932	3/303	0.0484869	0.293408	0	0	3.66703	11.0981	HRAS;MET;MAPK3
Angiopoietin Like Protein 8 Regulatory Pathway WP3915	2/132	0.0495055	0.29578	0	0	5.61167	16.8668	HRAS;MAPK3
Extracellular vesicles in the crosstalk of cardiac cells WP4300	1/19	0.050094	0.291906	0	0	19.4932	58.3597	SOD1
Serotonin Receptor 4/6/7 and NR3C Signaling WP734	1/19	0.050094	0.295555	0	0	19.4932	58.3597	MAPK3
BMP Signaling Pathway in Eyelid Development WP3927	1/20	0.0526612	0.303123	0	0	18.5185	54.5162	MAPK3
Neovascularisation processes WP4331	1/21	0.0552216	0.314031	0	0	17.6367	51.0829	MAPK3
NAD+ biosynthetic pathways WP3645	1/22	0.0577752	0.324641	0	0	16.835	47.9999	CD38
Glutathione metabolism WP100	1/23	0.060322	0.334964	0	0	16.1031	45.2183	GPX1
Calcium Regulation in the Cardiac Cell WP536	2/149	0.0613449	0.336683	0	0	4.97141	13.8764	CAMK2B;ADCY5
Breast cancer pathway WP4262	2/154	0.0649951	0.352617	0	0	4.81	13.1479	HRAS;MAPK3
MTHFR deficiency WP4288	1/25	0.0653953	0.339193	0	0	14.8148	40.4045	GRIN2A
IL-7 Signaling Pathway WP205	1/25	0.0653953	0.342962	0	0	14.8148	40.4045	MAPK3
Hypothesized Pathways in Pathogenesis of Cardiovascular Disease WP3668	1/25	0.0653953	0.346816	0	0	14.8148	40.4045	MAPK3
Signal Transduction of S1P Receptor WP26	1/25	0.0653953	0.350757	0	0	14.8148	40.4045	MAPK3
Myometrial Relaxation and Contraction Pathways WP289	2/156	0.0664754	0.341048	0	0	4.74834	12.8724	CAMK2B;ADCY5
EPO Receptor Signaling WP581	1/26	0.0679219	0.344722	0	0	14.245	38.3105	MAPK3
Sudden Infant Death Syndrome (SIDS) Susceptibility Pathways WP706	2/158	0.067967	0.341281	0	0	4.68823	12.6054	SNAP25;ATP1A3
Epithelial to mesenchymal transition in colorectal cancer WP4239	2/159	0.068717	0.341415	0	0	4.65875	12.475	HRAS;MAPK3
Follicle Stimulating Hormone (FSH) signaling pathway WP2035	1/27	0.0704418	0.342768	0	0	13.7174	36.3919	MAPK3
Canonical and Non-canonical Notch signaling WP3845	1/27	0.0704418	0.346339	0	0	13.7174	36.3919	DNER
EGF/EGFR Signaling Pathway WP437	2/162	0.0709835	0.34188	0	0	4.57247	12.0956	AP2S1;HRAS
Nanoparticle-mediated activation of receptor signaling WP2643	1/28	0.072955	0.347826	0	0	13.2275	34.6285	HRAS
Statin Pathway WP430	1/29	0.0754615	0.356178	0	0	12.7714	33.003	LRP1
PI3K-AKT-mTOR signaling pathway and therapeutic opportunities WP3844	1/30	0.0779614	0.364334	0	0	12.3457	31.5005	HRAS
IL17 signaling pathway WP2112	1/31	0.0804546	0.3723	0	0	11.9474	30.1083	MAPK3
Resistin as a regulator of inflammation WP4481	1/33	0.0854213	0.383989	0	0	11.2233	27.6112	MAPK3
Prion disease pathway WP3995	1/33	0.0854213	0.387681	0	0	11.2233	27.6112	MAPK3
Monoamine GPCRs WP58	1/33	0.0854213	0.391445	0	0	11.2233	27.6112	DRD2
p38 MAPK Signaling Pathway WP400	1/34	0.0878947	0.387722	0	0	10.8932	26.4882	HRAS
BDNF-TrkB Signaling WP3676	1/34	0.0878947	0.39138	0	0	10.8932	26.4882	HRAS
The effect of progerin on the involved genes in Hutchinson-Gilford Progeria Syndrome WP4320	1/37	0.0952757	0.41639	0	0	10.01	23.5333	MBD3
Striated Muscle Contraction Pathway WP383	1/38	0.097723	0.41932	0	0	9.74659	22.6668	ACTN4
Nuclear Receptors WP170	1/38	0.097723	0.423167	0	0	9.74659	22.6668	NR2F1
IL-5 Signaling Pathway WP127	1/40	0.102598	0.432378	0	0	9.25926	21.0827	MAPK3
Bladder Cancer WP2828	1/40	0.102598	0.436273	0	0	9.25926	21.0827	HRAS
TNF related weak inducer of apoptosis (TWEAK) Signaling Pathway WP2036	1/42	0.107447	0.444869	0	0	8.81834	19.6716	MAPK3
DNA Replication WP466	1/42	0.107447	0.448806	0	0	8.81834	19.6716	MCM6
IL-6 signaling pathway WP364	1/43	0.109862	0.450913	0	0	8.61326	19.0226	MAPK3
Selenium Metabolism and Selenoproteins WP28	1/46	0.117069	0.468275	0	0	8.05153	17.2705	GPX1
Regulation of Microtubule Cytoskeleton WP2038	1/46	0.117069	0.472277	0	0	8.05153	17.2705	DPYSL2
Aryl Hydrocarbon Receptor WP2586	1/46	0.117069	0.476349	0	0	8.05153	17.2705	HRAS
Thymic Stromal LymphoPoietin (TSLP) Signaling Pathway WP2203	1/47	0.119458	0.473817	0	0	7.88022	16.7438	MAPK3
Hepatitis C and Hepatocellular Carcinoma WP3646	1/49	0.124218	0.484553	0	0	7.55858	15.7651	MAPK3
Structural Pathway of Interleukin 1 (IL-1) WP2637	1/49	0.124218	0.48859	0	0	7.55858	15.7651	MAPK3
Vitamin B12 Metabolism WP1533	1/50	0.126588	0.489752	0	0	7.40741	15.3097	SOD1
Copper homeostasis WP3286	1/52	0.13131	0.50389	0	0	7.12251	14.4601	SOD1
VEGFA-VEGFR2 Signaling Pathway WP3888	2/236	0.133391	0.507745	0	0	3.13873	6.32289	HRAS;MAPK3
IL-4 Signaling Pathway WP395	1/54	0.136007	0.513563	0	0	6.85871	13.6835	MAPK3
IL-1 signaling pathway WP195	1/55	0.138346	0.510152	0	0	6.73401	13.3198	MAPK3
RANKL/RANK (Receptor activator of NFKB (ligand)) Signaling Pathway WP2018	1/55	0.138346	0.514169	0	0	6.73401	13.3198	MAPK3
Cardiac Hypertrophic Response WP2795	1/55	0.138346	0.51825	0	0	6.73401	13.3198	MAPK3
TYROBP Causal Network WP3945	1/61	0.152251	0.557073	0	0	6.07165	11.4282	GPX1
MECP2 and Associated Rett Syndrome WP3584	1/62	0.154547	0.55684	0	0	5.97372	11.1545	TET2
T-Cell antigen Receptor (TCR) pathway during Staphylococcus aureus infection WP3863	1/62	0.154547	0.561124	0	0	5.97372	11.1545	MAPK3
G1 to S cell cycle control WP45	1/64	0.15912	0.568976	0	0	5.78704	10.6371	MCM6
Pathways Affected in Adenoid Cystic Carcinoma WP3651	1/65	0.161398	0.572781	0	0	5.69801	10.3925	HRAS
Chromosomal and microsatellite instability in colorectal cancer WP4216	1/73	0.179403	0.631926	0	0	5.07357	8.71701	MAPK3
Peptide GPCRs WP24	1/74	0.181626	0.63035	0	0	5.00501	8.53756	CX3CR1
Arrhythmogenic Right Ventricular Cardiomyopathy WP2118	1/74	0.181626	0.635019	0	0	5.00501	8.53756	ACTN4
MicroRNAs in cardiomyocyte hypertrophy WP1544	1/84	0.203541	0.696169	0	0	4.40917	7.01891	MAPK3
Viral Acute Myocarditis WP4298	1/84	0.203541	0.70125	0	0	4.40917	7.01891	MAPK3
Retinoblastoma Gene in Cancer WP2446	1/87	0.210002	0.713101	0	0	4.25713	6.64384	MCM6
Pancreatic adenocarcinoma pathway WP4263	1/89	0.214281	0.722433	0	0	4.16146	6.4106	MAPK3
GPCRs, Other WP117	1/91	0.218537	0.726405	0	0	4.07	6.18966	ADORA2A
Apoptosis Modulation and Signaling WP1772	1/91	0.218537	0.731557	0	0	4.07	6.18966	MAPK3
Corticotropin-releasing hormone signaling pathway WP2355	1/93	0.222771	0.735299	0	0	3.98248	5.98014	MAPK3
B Cell Receptor Signaling Pathway WP23	1/97	0.23117	0.757725	0	0	3.81825	5.59221	HRAS
Integrin-mediated Cell Adhesion WP185	1/101	0.239481	0.779552	0	0	3.66703	5.24122	HRAS
Toll-like Receptor Signaling Pathway WP75	1/103	0.243603	0.782181	0	0	3.59583	5.07808	MAPK3
Electron Transport Chain (OXPHOS system in mitochondria) WP111	1/103	0.243603	0.787539	0	0	3.59583	5.07808	SLC25A27
Senescence and Autophagy in Cancer WP615	1/105	0.247703	0.789973	0	0	3.52734	4.92248	HRAS
DNA Damage Response (only ATM dependent) WP710	1/110	0.257859	0.816841	0	0	3.367	4.56345	HRAS
Wnt Signaling WP428	1/115	0.267879	0.842927	0	0	3.22061	4.24225	CAMK2B
ESC Pluripotency Pathways WP3931	1/116	0.269868	0.843559	0	0	3.19285	4.18207	HRAS
Spinal Cord Injury WP2431	1/118	0.273828	0.850308	0	0	3.13873	4.06546	MAPK3
Cell Cycle WP179	1/120	0.277767	0.856903	0	0	3.08642	3.95362	MCM6
Adipogenesis WP236	1/130	0.297152	0.91075	0	0	2.849	3.4573	NR2F1
TGF-beta Signaling Pathway WP366	1/132	0.300967	0.916492	0	0	2.80584	3.36912	MET
Regulation of toll-like receptor signaling pathway WP1449	1/139	0.31416	0.950536	0	0	2.66454	3.08514	MAPK3
Endoderm Differentiation WP2853	1/141	0.317885	0.955679	0	0	2.62674	3.01042	AHDC1
Mesodermal Commitment Pathway WP2857	1/147	0.328939	0.982654	0	0	2.51953	2.80142	AHDC1
Regulation of Actin Cytoskeleton WP51	1/150	0.334401	0.992686	0	0	2.46914	2.70473	MAPK3
Vitamin D Receptor Pathway WP2877	1/182	0.390006	1	0	0	2.035	1.91614	DNER
Ciliary landscape WP4352	1/216	0.444093	1	0	0	1.71468	1.39184	MCM6
Nuclear Receptors Meta-Pathway WP2882	1/319	0.580798	1	0	0	1.16104	0.630851	DNER

## Sheet: C. GO BP (SFARI)
Gene Ontology Biological Process (GO BP) enrichment of human orthologs of DEGs associated with autistic spectrum disorders in SFARI
Term	Overlap	P-value	Adjusted P-value	Old P-value	Old Adjusted P-value	Odds Ratio	Combined Score	Genes
chemical synaptic transmission (GO:0007268)	7/289	1.21167e-05	0.0618316	0	0	8.97091	101.559	SNAP25;GABRB2;GRIN2A;NRXN1;GABRA3;DRD2;SYN1
cellular response to ammonium ion (GO:0071242)	3/23	3.17123e-05	0.080914	0	0	48.3092	500.425	GABRB2;PPP1R9B;MAPK3
anterograde trans-synaptic signaling (GO:0098916)	6/240	4.47512e-05	0.0761217	0	0	9.25926	92.7259	SNAP25;GABRB2;GRIN2A;NRXN1;GABRA3;SYN1
regulation of postsynaptic membrane potential (GO:0060078)	3/33	9.58498e-05	0.0978243	0	0	33.67	311.54	GRIN2A;GABRA3;DRD2
chemical synaptic transmission, postsynaptic (GO:0099565)	3/33	9.58498e-05	0.12228	0	0	33.67	311.54	GRIN2A;GABRA3;DRD2
regulation of potassium ion transport (GO:0043266)	3/36	0.000124718	0.106072	0	0	30.8642	277.452	DPP10;ANK2;DRD2
regulation of metal ion transport (GO:0010959)	3/37	0.000135464	0.0987529	0	0	30.03	267.472	CAMK2B;ANK2;DRD2
positive regulation of cellular component organization (GO:0051130)	4/106	0.000192258	0.122637	0	0	13.9762	119.59	CAMK2B;GPX1;LRP1;NRXN1
regulation of synaptic transmission, glutamatergic (GO:0051966)	3/45	0.000243644	0.138146	0	0	24.6914	205.427	TSHZ3;NRXN1;DRD2
positive regulation of synapse maturation (GO:0090129)	2/9	0.000254477	0.129859	0	0	82.3045	681.177	CAMK2B;NRXN1
response to histamine (GO:0034776)	2/10	0.000317546	0.135036	0	0	74.0741	596.658	GABRB2;DRD2
regulation of synapse maturation (GO:0090128)	2/10	0.000317546	0.147312	0	0	74.0741	596.658	CAMK2B;NRXN1
blood circulation (GO:0008015)	3/50	0.000333342	0.130849	0	0	22.2222	177.919	GPX1;ADORA2A;SOD1
axonogenesis (GO:0007409)	5/223	0.000334071	0.121769	0	0	8.30427	66.4687	NRXN1;APBB1;DRD2;HRAS;MAPK3
synaptic transmission, GABAergic (GO:0051932)	2/11	0.00038744	0.1163	0	0	67.3401	529.02	GABRB2;GABRA3
regulation of long-term neuronal synaptic plasticity (GO:0048169)	2/11	0.00038744	0.123569	0	0	67.3401	529.02	CAMK2B;DRD2
heart process (GO:0003015)	2/11	0.00038744	0.131807	0	0	67.3401	529.02	GPX1;SOD1
response to reactive oxygen species (GO:0000302)	3/60	0.000571003	0.161879	0	0	18.5185	138.298	GPX1;MAPK3;SOD1
purine-containing compound catabolic process (GO:0072523)	2/14	0.000637717	0.147921	0	0	52.9101	389.292	GPX1;GDA
response to ethanol (GO:0045471)	2/14	0.000637717	0.154965	0	0	52.9101	389.292	GRIN2A;SOD1
purine nucleotide catabolic process (GO:0006195)	2/14	0.000637717	0.162714	0	0	52.9101	389.292	GPX1;GDA
cAMP biosynthetic process (GO:0006171)	2/14	0.000637717	0.171277	0	0	52.9101	389.292	ADORA2A;ADCY5
synapse assembly (GO:0007416)	3/63	0.000658853	0.146179	0	0	17.6367	129.189	NRXN1;DNER;DRD2
endocytosis (GO:0006897)	5/263	0.000707537	0.15044	0	0	7.04126	51.0753	ADORA2A;LRP1;DPYSL2;DNER;MAPK3
positive regulation of synaptic transmission (GO:0050806)	3/67	0.000788772	0.161004	0	0	16.5837	118.491	GRIN2A;TSHZ3;NRXN1
MAPK cascade (GO:0000165)	5/278	0.000907508	0.178116	0	0	6.66134	46.6614	CAMK2B;GRIN2A;HRAS;MET;MAPK3
protein localization to membrane (GO:0072657)	4/160	0.000913925	0.172732	0	0	9.25926	64.7941	DPP10;EFR3A;NRXN1;ANK2
nucleotide catabolic process (GO:0009166)	2/17	0.000948138	0.172798	0	0	43.573	303.312	GPX1;GDA
positive regulation of synaptic transmission, glutamatergic (GO:0051968)	2/18	0.00106481	0.18737	0	0	41.1523	281.685	TSHZ3;NRXN1
gland development (GO:0048732)	3/75	0.00109503	0.186264	0	0	14.8148	100.992	PHF2;MET;SOD1
gamma-aminobutyric acid signaling pathway (GO:0007214)	2/19	0.00118803	0.189453	0	0	38.9864	262.591	GABRB2;GABRA3
excitatory postsynaptic potential (GO:0060079)	2/19	0.00118803	0.195565	0	0	38.9864	262.591	GRIN2A;DRD2
adenylate cyclase-activating G-protein coupled receptor signaling pathway (GO:0007189)	3/78	0.00122668	0.189689	0	0	14.245	95.4907	ADORA2A;DRD2;ADCY5
purine nucleotide metabolic process (GO:0006163)	2/20	0.00131775	0.192128	0	0	37.037	245.623	GPX1;GDA
hydrogen peroxide metabolic process (GO:0042743)	2/20	0.00131775	0.197779	0	0	37.037	245.623	GPX1;SOD1
positive regulation of MAP kinase activity (GO:0043406)	4/177	0.00132812	0.188262	0	0	8.36995	55.4425	NTRK1;HRAS;MAPK3;SOD1
nervous system development (GO:0007399)	6/455	0.00137558	0.189719	0	0	4.884	32.1801	ADORA2A;GDA;DPYSL2;NRXN1;DNER;DRD2
hepaticobiliary system development (GO:0061008)	2/21	0.00145395	0.185487	0	0	35.2734	230.458	PHF2;MET
negative regulation of G-protein coupled receptor protein signaling pathway (GO:0045744)	2/21	0.00145395	0.190243	0	0	35.2734	230.458	DRD2;MET
long-term synaptic potentiation (GO:0060291)	2/21	0.00145395	0.19525	0	0	35.2734	230.458	GRIN2A;TSHZ3
cellular response to amyloid-beta (GO:1904646)	2/23	0.00174561	0.217265	0	0	32.2061	204.53	LRP1;ATP1A3
cAMP metabolic process (GO:0046058)	2/24	0.00190102	0.225602	0	0	30.8642	193.375	ADORA2A;ADCY5
regulation of neuronal synaptic plasticity (GO:0048168)	2/24	0.00190102	0.230974	0	0	30.8642	193.375	CAMK2B;DRD2
response to alcohol (GO:0097305)	2/25	0.00206276	0.233917	0	0	29.6296	183.221	GRIN2A;SOD1
response to amyloid-beta (GO:1904645)	2/25	0.00206276	0.239233	0	0	29.6296	183.221	LRP1;ATP1A3
positive regulation of ERK1 and ERK2 cascade (GO:0070374)	4/201	0.00211456	0.234578	0	0	7.37055	45.3946	NTRK1;HRAS;MET;MAPK3
regulation of MAPK cascade (GO:0043408)	4/203	0.00219193	0.237987	0	0	7.29794	44.6851	NTRK1;HRAS;MET;MAPK3
positive regulation of phosphorylation (GO:0042327)	4/208	0.00239387	0.254498	0	0	7.12251	42.9832	NTRK1;HRAS;MET;MAPK3
regulation of kinase activity (GO:0043549)	3/101	0.00257226	0.267882	0	0	11.0011	65.5992	NTRK1;MET;SOD1
cardiac muscle cell action potential involved in contraction (GO:0086002)	2/28	0.00258564	0.263891	0	0	26.455	157.613	ANK2;SCN1A
cardiac muscle cell action potential (GO:0086001)	2/29	0.00277238	0.272067	0	0	25.5428	150.397	ANK2;SCN1A
regulation of striated muscle contraction (GO:0006942)	2/29	0.00277238	0.277401	0	0	25.5428	150.397	C12ORF57;ANK2
RNA splicing (GO:0008380)	3/106	0.00294963	0.283999	0	0	10.4822	61.07	SF3B1;SRSF11;PPP1R9B
cyclic purine nucleotide metabolic process (GO:0052652)	2/30	0.00296529	0.28022	0	0	24.6914	143.723	ADORA2A;ADCY5
negative regulation of cellular process (GO:0048523)	6/534	0.00307123	0.284954	0	0	4.16146	24.0769	NTRK1;CHMP1A;APBB1;DRD2;HRAS;PPP1R9B
liver development (GO:0001889)	2/31	0.00316432	0.288349	0	0	23.8949	137.534	PHF2;MET
positive regulation of catalytic activity (GO:0043085)	2/33	0.00358066	0.320563	0	0	22.4467	126.424	MAPK3;SOD1
activation of protein kinase activity (GO:0032147)	4/233	0.00359843	0.316599	0	0	6.35829	35.7797	NTRK1;ADCY5;MAPK3;SOD1
cellular response to oxidative stress (GO:0034599)	3/115	0.00371117	0.320985	0	0	9.66184	54.0716	GPX1;MAPK3;SOD1
protein localization to cell periphery (GO:1990778)	3/117	0.00389516	0.331284	0	0	9.49668	52.6877	DPP10;EFR3A;ANK2
regulation of mitochondrial membrane potential (GO:0051881)	2/35	0.00402113	0.33639	0	0	21.164	116.745	SLC25A27;SOD1
calcium ion transmembrane import into cytosol (GO:0097553)	2/36	0.00425033	0.34983	0	0	20.5761	112.361	GRIN2A;DRD2
regulation of ERK1 and ERK2 cascade (GO:0070372)	4/247	0.0044267	0.358563	0	0	5.9979	32.5092	NTRK1;HRAS;MET;MAPK3
vesicle-mediated transport (GO:0016192)	5/410	0.00490113	0.390789	0	0	4.51671	24.0212	SNAP25;LRP1;DPYSL2;CHMP1A;DNER
regulation of cellular localization (GO:0060341)	2/40	0.00522616	0.410294	0	0	18.5185	97.2978	SYN1;ADCY5
protein localization to plasma membrane (GO:0072659)	3/130	0.00522682	0.404129	0	0	8.54701	44.9056	DPP10;EFR3A;ANK2
regulation of protein phosphorylation (GO:0001932)	4/261	0.00537524	0.409401	0	0	5.67617	29.6634	NTRK1;HRAS;MAPK3;SOD1
cellular response to peptide (GO:1901653)	2/41	0.00548471	0.411595	0	0	18.0668	94.0522	LRP1;ATP1A3
adenylate cyclase-modulating G-protein coupled receptor signaling pathway (GO:0007188)	3/134	0.00568511	0.420451	0	0	8.29187	42.8682	ADORA2A;DRD2;ADCY5
cellular response to organic cyclic compound (GO:0071407)	3/135	0.00580333	0.423063	0	0	8.23045	42.3813	GABRB2;ATP1A3;ADCY5
response to hydrogen peroxide (GO:0042542)	2/43	0.0060191	0.426604	0	0	17.2265	88.0761	GPX1;SOD1
positive regulation of protein localization to plasma membrane (GO:1903078)	2/43	0.0060191	0.432612	0	0	17.2265	88.0761	DPP10;LRP1
positive regulation of transferase activity (GO:0051347)	3/137	0.00604419	0.422514	0	0	8.1103	41.4327	NTRK1;MET;MAPK3
heart contraction (GO:0060047)	2/44	0.00629487	0.434091	0	0	16.835	85.3202	GPX1;SOD1
peptidyl-tyrosine autophosphorylation (GO:0038083)	2/45	0.00657633	0.447453	0	0	16.4609	82.7042	NTRK1;MAPK3
positive regulation of ion transport (GO:0043270)	2/46	0.00686343	0.454858	0	0	16.1031	80.2182	ANK2;DRD2
positive regulation of protein localization to cell periphery (GO:1904377)	2/46	0.00686343	0.460843	0	0	16.1031	80.2182	DPP10;LRP1
positive regulation of MAPK cascade (GO:0043410)	4/289	0.00766261	0.501311	0	0	5.12623	24.9719	NTRK1;HRAS;MET;MAPK3
glutathione metabolic process (GO:0006749)	2/49	0.0077583	0.501147	0	0	15.1172	73.4542	GPX1;SOD1
regulation of calcium ion transport (GO:0051924)	2/52	0.00870286	0.54828	0	0	14.245	67.5798	CAMK2B;ANK2
positive regulation of nervous system development (GO:0051962)	2/52	0.00870286	0.555134	0	0	14.245	67.5798	CAMK2B;NRXN1
axon guidance (GO:0007411)	3/158	0.00893717	0.556176	0	0	7.03235	33.1754	NRXN1;HRAS;MAPK3
positive regulation of protein modification process (GO:0031401)	3/163	0.00972638	0.597997	0	0	6.81663	31.5809	NTRK1;HRAS;MAPK3
negative regulation of apoptotic process (GO:0043066)	5/485	0.00979146	0.594831	0	0	3.81825	17.6642	NTRK1;GPX1;CD38;MET;SOD1
cellular defense response (GO:0006968)	2/56	0.0100382	0.602643	0	0	13.2275	60.8646	CX3CR1;ADORA2A
chloride transmembrane transport (GO:1902476)	2/57	0.0103853	0.609153	0	0	12.9955	59.3549	GABRB2;GABRA3
positive regulation of cell death (GO:0010942)	2/57	0.0103853	0.616236	0	0	12.9955	59.3549	NTRK1;LRP1
protein autophosphorylation (GO:0046777)	3/175	0.0117824	0.683246	0	0	6.34921	28.1978	CAMK2B;NTRK1;MAPK3
positive regulation of cell projection organization (GO:0031346)	2/63	0.0125781	0.705343	0	0	11.7578	51.4497	CAMK2B;NTRK1
negative regulation of neuron apoptotic process (GO:0043524)	2/63	0.0125781	0.71318	0	0	11.7578	51.4497	NTRK1;SOD1
adenylate cyclase-inhibiting G-protein coupled receptor signaling pathway (GO:0007193)	2/63	0.0125781	0.721193	0	0	11.7578	51.4497	DRD2;ADCY5
inorganic anion transmembrane transport (GO:0098661)	2/64	0.0129616	0.718947	0	0	11.5741	50.2982	GABRB2;GABRA3
regulation of protein localization to plasma membrane (GO:1903076)	2/67	0.0141424	0.767752	0	0	11.0558	47.0821	DPP10;LRP1
regulation of cardiac conduction (GO:1903779)	2/67	0.0141424	0.776008	0	0	11.0558	47.0821	ATP1A3;ANK2
regulation of GTPase activity (GO:0043087)	3/188	0.014272	0.766634	0	0	5.91017	25.115	NTRK1;HRAS;SOD1
regulation of endocytosis (GO:0030100)	2/69	0.0149546	0.794929	0	0	10.7354	45.118	LRP1;AP2S1
calcium-mediated signaling (GO:0019722)	2/70	0.015368	0.808486	0	0	10.582	44.1848	ANK2;PPP1R9B
astrocyte activation (GO:0048143)	1/6	0.0160929	0.746565	0	0	61.7284	254.9	LRP1
regulation of lysosomal protein catabolic process (GO:1905165)	1/6	0.0160929	0.753414	0	0	61.7284	254.9	LRP1
positive regulation of oxidative stress-induced cell death (GO:1903209)	1/6	0.0160929	0.76039	0	0	61.7284	254.9	SOD1
regulation of skeletal muscle contraction (GO:0014819)	1/6	0.0160929	0.767496	0	0	61.7284	254.9	C12ORF57
imitative learning (GO:0098596)	1/6	0.0160929	0.774737	0	0	61.7284	254.9	NRXN1
regulation of respiratory system process (GO:0044065)	1/6	0.0160929	0.782115	0	0	61.7284	254.9	TSHZ3
positive regulation of amyloid-beta clearance (GO:1900223)	1/6	0.0160929	0.789636	0	0	61.7284	254.9	LRP1
prepulse inhibition (GO:0060134)	1/6	0.0160929	0.797302	0	0	61.7284	254.9	DRD2
positive regulation of histone phosphorylation (GO:0033129)	1/6	0.0160929	0.805119	0	0	61.7284	254.9	MAPK3
positive regulation of growth hormone secretion (GO:0060124)	1/6	0.0160929	0.81309	0	0	61.7284	254.9	DRD2
vocal learning (GO:0042297)	1/6	0.0160929	0.821221	0	0	61.7284	254.9	NRXN1
neuron projection maintenance (GO:1990535)	1/6	0.0160929	0.829516	0	0	61.7284	254.9	ATP1A3
mRNA 5'-splice site recognition (GO:0000395)	1/6	0.0160929	0.837981	0	0	61.7284	254.9	PRPF39
regulation of epithelial cell proliferation (GO:0050678)	2/72	0.0162097	0.745207	0	0	10.2881	42.4089	GPX1;HRAS
chloride transport (GO:0006821)	2/73	0.0166378	0.758058	0	0	10.1471	41.5635	GABRB2;GABRA3
regulation of gene expression, epigenetic (GO:0040029)	2/74	0.0170707	0.7709	0	0	10.01	40.7447	GPX1;SF3B1
cAMP-mediated signaling (GO:0019933)	2/75	0.0175084	0.776915	0	0	9.87654	39.9514	ADORA2A;ADCY5
purine ribonucleotide biosynthetic process (GO:0009152)	2/75	0.0175084	0.78373	0	0	9.87654	39.9514	ADORA2A;ADCY5
excitatory chemical synaptic transmission (GO:0098976)	1/7	0.0187502	0.708759	0	0	52.9101	210.399	GRIN2A
retinoic acid receptor signaling pathway (GO:0048384)	1/7	0.0187502	0.714048	0	0	52.9101	210.399	ACTN4
negative regulation of platelet-derived growth factor receptor-beta signaling pathway (GO:2000587)	1/7	0.0187502	0.719417	0	0	52.9101	210.399	LRP1
SA node cell action potential (GO:0086015)	1/7	0.0187502	0.724867	0	0	52.9101	210.399	ANK2
regulation of sterol transport (GO:0032371)	1/7	0.0187502	0.730401	0	0	52.9101	210.399	LRP1
retrograde axonal transport (GO:0008090)	1/7	0.0187502	0.736019	0	0	52.9101	210.399	SOD1
regulation of growth hormone secretion (GO:0060123)	1/7	0.0187502	0.741725	0	0	52.9101	210.399	DRD2
cellular response to histamine (GO:0071420)	1/7	0.0187502	0.747519	0	0	52.9101	210.399	GABRB2
vesicle transport along actin filament (GO:0030050)	1/7	0.0187502	0.753405	0	0	52.9101	210.399	ACTN4
positive regulation of neuroblast proliferation (GO:0002052)	1/7	0.0187502	0.759385	0	0	52.9101	210.399	DRD2
regulation of extracellular matrix organization (GO:1903053)	1/7	0.0187502	0.76546	0	0	52.9101	210.399	LRP1
postsynaptic density assembly (GO:0097107)	1/7	0.0187502	0.771633	0	0	52.9101	210.399	NRXN1
regulation of RNA biosynthetic process (GO:2001141)	1/7	0.0187502	0.777906	0	0	52.9101	210.399	ACTN4
positive regulation of lipid transport (GO:0032370)	1/7	0.0187502	0.784283	0	0	52.9101	210.399	LRP1
ATP hydrolysis coupled cation transmembrane transport (GO:0099132)	1/7	0.0187502	0.790764	0	0	52.9101	210.399	ATP1A3
positive regulation of dendritic spine morphogenesis (GO:0061003)	1/7	0.0187502	0.797354	0	0	52.9101	210.399	CAMK2B
peroxisome proliferator activated receptor signaling pathway (GO:0035357)	1/7	0.0187502	0.804054	0	0	52.9101	210.399	ACTN4
cardiac atrium development (GO:0003230)	1/7	0.0187502	0.810868	0	0	52.9101	210.399	ANK2
inner ear receptor stereocilium organization (GO:0060122)	1/7	0.0187502	0.817799	0	0	52.9101	210.399	SOD1
ATP hydrolysis coupled proton transport (GO:0015991)	1/7	0.0187502	0.824849	0	0	52.9101	210.399	ATP1A3
regulation of cellular response to heat (GO:1900034)	2/78	0.0188499	0.702123	0	0	9.49668	37.7137	CAMK2B;MAPK3
negative regulation of cell communication (GO:0010648)	2/78	0.0188499	0.707286	0	0	9.49668	37.7137	NTRK1;MET
peptidyl-tyrosine phosphorylation (GO:0018108)	2/79	0.0193064	0.713918	0	0	9.37647	37.0119	NTRK1;MAPK3
positive regulation of binding (GO:0051099)	2/81	0.0202334	0.742815	0	0	9.14495	35.6691	LRP1;MET
ephrin receptor signaling pathway (GO:0048013)	2/82	0.0207038	0.749303	0	0	9.03342	35.0265	AP2S1;HRAS
modulation of chemical synaptic transmission (GO:0050804)	2/82	0.0207038	0.754655	0	0	9.03342	35.0265	DRD2;SYN1
central nervous system development (GO:0007417)	3/217	0.0208291	0.748529	0	0	5.12033	19.8228	GRIN2A;ADORA2A;DNER
negative regulation of neuron death (GO:1901215)	2/83	0.0211788	0.750524	0	0	8.92459	34.4021	NTRK1;SOD1
negative regulation of signaling (GO:0023057)	2/83	0.0211788	0.755773	0	0	8.92459	34.4021	NTRK1;MET
ion transmembrane transport (GO:0034220)	3/219	0.021333	0.750773	0	0	5.07357	19.5206	GABRB2;GABRA3;ATP1A3
arachidonate transport (GO:1903963)	1/8	0.0214005	0.669981	0	0	46.2963	177.979	DRD2
response to ammonium ion (GO:0060359)	1/8	0.0214005	0.674117	0	0	46.2963	177.979	DRD2
lipoprotein localization (GO:0044872)	1/8	0.0214005	0.678304	0	0	46.2963	177.979	LRP1
regulation of dopamine receptor signaling pathway (GO:0060159)	1/8	0.0214005	0.682543	0	0	46.2963	177.979	DRD2
atrial cardiac muscle cell to AV node cell signaling (GO:0086026)	1/8	0.0214005	0.686836	0	0	46.2963	177.979	ANK2
regulation of cytoplasmic transport (GO:1903649)	1/8	0.0214005	0.691183	0	0	46.2963	177.979	MAPK3
response to forskolin (GO:1904321)	1/8	0.0214005	0.695585	0	0	46.2963	177.979	ADCY5
arachidonic acid secretion (GO:0050482)	1/8	0.0214005	0.700044	0	0	46.2963	177.979	DRD2
DNA damage induced protein phosphorylation (GO:0006975)	1/8	0.0214005	0.704561	0	0	46.2963	177.979	MAPK3
aorta development (GO:0035904)	1/8	0.0214005	0.709136	0	0	46.2963	177.979	LRP1
cellular response to forskolin (GO:1904322)	1/8	0.0214005	0.713771	0	0	46.2963	177.979	ADCY5
myelin maintenance (GO:0043217)	1/8	0.0214005	0.718467	0	0	46.2963	177.979	SOD1
regulation of dopamine uptake involved in synaptic transmission (GO:0051584)	1/8	0.0214005	0.723225	0	0	46.2963	177.979	DRD2
regulation of lipid transport (GO:0032368)	1/8	0.0214005	0.728046	0	0	46.2963	177.979	LRP1
lipoprotein transport (GO:0042953)	1/8	0.0214005	0.732932	0	0	46.2963	177.979	LRP1
regulation of synaptic transmission, dopaminergic (GO:0032225)	1/8	0.0214005	0.737885	0	0	46.2963	177.979	DRD2
regulation of nitrogen compound metabolic process (GO:0051171)	1/8	0.0214005	0.742904	0	0	46.2963	177.979	LRP1
regulation of stress-activated protein kinase signaling cascade (GO:0070302)	1/8	0.0214005	0.747993	0	0	46.2963	177.979	MAPK3
regulation of mitotic nuclear division (GO:0007088)	2/84	0.0216583	0.669833	0	0	8.81834	33.7951	CHMP1A;PPP1R9B
positive regulation of supramolecular fiber organization (GO:1902905)	2/84	0.0216583	0.673917	0	0	8.81834	33.7951	GPX1;MET
negative regulation of transcription, DNA-templated (GO:0045892)	6/813	0.0218058	0.670332	0	0	2.73336	10.4567	MBD3;TSHZ3;CHMP1A;NR2F1;CD38;APBB1
transmembrane receptor protein tyrosine kinase signaling pathway (GO:0007169)	4/396	0.0220076	0.672483	0	0	3.74111	14.2775	NTRK1;AP2S1;HRAS;MAPK3
regulation of apoptotic process (GO:0042981)	6/815	0.0220404	0.669478	0	0	2.72665	10.4018	NTRK1;CD38;ACTN4;APBB1;MET;SOD1
calcium ion homeostasis (GO:0055074)	2/87	0.0231238	0.69823	0	0	8.51426	32.0723	CADPS2;ANK2
histone H3-K4 trimethylation (GO:0080182)	1/9	0.0240438	0.656126	0	0	41.1523	153.411	TET2
negative regulation of synaptic transmission, glutamatergic (GO:0051967)	1/9	0.0240438	0.659653	0	0	41.1523	153.411	DRD2
detection of mechanical stimulus involved in sensory perception (GO:0050974)	1/9	0.0240438	0.663219	0	0	41.1523	153.411	SCN1A
neuron projection organization (GO:0106027)	1/9	0.0240438	0.666823	0	0	41.1523	153.411	ATP1A3
response to dopamine (GO:1903350)	1/9	0.0240438	0.670467	0	0	41.1523	153.411	MAPK3
negative regulation of chromatin silencing (GO:0031936)	1/9	0.0240438	0.674151	0	0	41.1523	153.411	PHF2
regulation of platelet-derived growth factor receptor-beta signaling pathway (GO:2000586)	1/9	0.0240438	0.677876	0	0	41.1523	153.411	LRP1
neurotrophin TRK receptor signaling pathway (GO:0048011)	1/9	0.0240438	0.681642	0	0	41.1523	153.411	NTRK1
cellular response to dopamine (GO:1903351)	1/9	0.0240438	0.68545	0	0	41.1523	153.411	MAPK3
vasodilation (GO:0042311)	1/9	0.0240438	0.689301	0	0	41.1523	153.411	SOD1
postsynaptic density organization (GO:0097106)	1/9	0.0240438	0.693195	0	0	41.1523	153.411	NRXN1
cellular response to superoxide (GO:0071451)	1/9	0.0240438	0.697134	0	0	41.1523	153.411	SOD1
sarcoplasmic reticulum calcium ion transport (GO:0070296)	1/9	0.0240438	0.701117	0	0	41.1523	153.411	ANK2
postsynaptic membrane assembly (GO:0097104)	1/9	0.0240438	0.705147	0	0	41.1523	153.411	NRXN1
regulation of organ growth (GO:0046620)	1/9	0.0240438	0.709223	0	0	41.1523	153.411	SOD1
regulation of sequestering of calcium ion (GO:0051282)	1/9	0.0240438	0.713346	0	0	41.1523	153.411	ANK2
negative regulation of alcohol biosynthetic process (GO:1902931)	1/9	0.0240438	0.717518	0	0	41.1523	153.411	SOD1
removal of superoxide radicals (GO:0019430)	1/9	0.0240438	0.721738	0	0	41.1523	153.411	SOD1
regulation of neuron apoptotic process (GO:0043523)	2/89	0.024123	0.654785	0	0	8.32293	30.9995	NTRK1;SOD1
positive regulation of protein phosphorylation (GO:0001934)	4/412	0.0250044	0.675118	0	0	3.59583	13.2639	NTRK1;HRAS;MET;MAPK3
central nervous system projection neuron axonogenesis (GO:0021952)	1/10	0.0266801	0.651427	0	0	37.037	134.216	C12ORF57
protein localization to synapse (GO:0035418)	1/10	0.0266801	0.654559	0	0	37.037	134.216	NRXN1
positive regulation of mRNA splicing, via spliceosome (GO:0048026)	1/10	0.0266801	0.657721	0	0	37.037	134.216	CELF4
regulation of histone phosphorylation (GO:0033127)	1/10	0.0266801	0.660914	0	0	37.037	134.216	MAPK3
regulation of neuroblast proliferation (GO:1902692)	1/10	0.0266801	0.664138	0	0	37.037	134.216	DRD2
positive regulation of lipid localization (GO:1905954)	1/10	0.0266801	0.667394	0	0	37.037	134.216	LRP1
UV protection (GO:0009650)	1/10	0.0266801	0.670681	0	0	37.037	134.216	GPX1
epithelial cell morphogenesis (GO:0003382)	1/10	0.0266801	0.674002	0	0	37.037	134.216	MET
regulation of amyloid-beta clearance (GO:1900221)	1/10	0.0266801	0.677355	0	0	37.037	134.216	LRP1
ESCRT complex disassembly (GO:1904896)	1/10	0.0266801	0.680742	0	0	37.037	134.216	CHMP1A
ESCRT III complex disassembly (GO:1904903)	1/10	0.0266801	0.684162	0	0	37.037	134.216	CHMP1A
regulation of actin filament-based movement (GO:1903115)	1/10	0.0266801	0.687618	0	0	37.037	134.216	ANK2
nerve growth factor signaling pathway (GO:0038180)	1/10	0.0266801	0.691108	0	0	37.037	134.216	NTRK1
regulation of phospholipase activity (GO:0010517)	1/10	0.0266801	0.694634	0	0	37.037	134.216	LRP1
actin filament-based transport (GO:0099515)	1/10	0.0266801	0.698197	0	0	37.037	134.216	ACTN4
energy coupled proton transmembrane transport, against electrochemical gradient (GO:0015988)	1/10	0.0266801	0.701795	0	0	37.037	134.216	ATP1A3
regulation of mammary gland epithelial cell proliferation (GO:0033599)	1/10	0.0266801	0.705432	0	0	37.037	134.216	GPX1
negative regulation of cytosolic calcium ion concentration (GO:0051481)	1/10	0.0266801	0.709106	0	0	37.037	134.216	DRD2
adenylate cyclase-inhibiting dopamine receptor signaling pathway (GO:0007195)	1/10	0.0266801	0.712818	0	0	37.037	134.216	DRD2
low-density lipoprotein particle receptor catabolic process (GO:0032802)	1/10	0.0266801	0.71657	0	0	37.037	134.216	AP2S1
axon development (GO:0061564)	2/94	0.0266971	0.648739	0	0	7.88022	28.5516	APBB1;DRD2
regulation of cytoskeleton organization (GO:0051493)	2/95	0.0272247	0.652243	0	0	7.79727	28.0985	LRP1;MAPK3
regulation of heart contraction (GO:0008016)	2/95	0.0272247	0.65532	0	0	7.79727	28.0985	ATP1A3;ANK2
positive regulation of protein localization to membrane (GO:1905477)	2/95	0.0272247	0.658426	0	0	7.79727	28.0985	DPP10;LRP1
cellular metal ion homeostasis (GO:0006875)	2/96	0.0277566	0.661879	0	0	7.71605	27.6565	ATP1A3;ANK2
positive regulation of neuron projection development (GO:0010976)	2/97	0.0282927	0.668415	0	0	7.6365	27.2253	CAMK2B;NTRK1
cell morphogenesis involved in neuron differentiation (GO:0048667)	2/97	0.0282927	0.671524	0	0	7.6365	27.2253	APBB1;DRD2
positive regulation of neuron differentiation (GO:0045666)	2/98	0.0288329	0.674929	0	0	7.55858	26.8045	CAMK2B;NTRK1
regulation of insulin secretion (GO:0050796)	2/98	0.0288329	0.678039	0	0	7.55858	26.8045	SNAP25;ADCY5
transcytosis (GO:0045056)	1/11	0.0293093	0.644679	0	0	33.67	118.85	LRP1
response to axon injury (GO:0048678)	1/11	0.0293093	0.64747	0	0	33.67	118.85	SOD1
negative regulation of peptide secretion (GO:0002792)	1/11	0.0293093	0.650285	0	0	33.67	118.85	DRD2
icosanoid secretion (GO:0032309)	1/11	0.0293093	0.653124	0	0	33.67	118.85	DRD2
synaptic transmission, dopaminergic (GO:0001963)	1/11	0.0293093	0.655989	0	0	33.67	118.85	DRD2
purine nucleobase metabolic process (GO:0006144)	1/11	0.0293093	0.658879	0	0	33.67	118.85	GDA
low-density lipoprotein receptor particle metabolic process (GO:0032799)	1/11	0.0293093	0.661794	0	0	33.67	118.85	AP2S1
regulation of synaptic transmission, GABAergic (GO:0032228)	1/11	0.0293093	0.664735	0	0	33.67	118.85	DRD2
positive regulation of sodium ion transmembrane transporter activity (GO:2000651)	1/11	0.0293093	0.667703	0	0	33.67	118.85	ACTN4
methylation-dependent chromatin silencing (GO:0006346)	1/11	0.0293093	0.670697	0	0	33.67	118.85	MBD3
regulation of synaptic vesicle cycle (GO:0098693)	1/11	0.0293093	0.673718	0	0	33.67	118.85	SYN1
camera-type eye morphogenesis (GO:0048593)	1/11	0.0293093	0.676767	0	0	33.67	118.85	C12ORF57
positive regulation of superoxide anion generation (GO:0032930)	1/11	0.0293093	0.679843	0	0	33.67	118.85	SOD1
postsynapse assembly (GO:0099068)	1/11	0.0293093	0.682947	0	0	33.67	118.85	NRXN1
positive regulation of ruffle assembly (GO:1900029)	1/12	0.0319316	0.673335	0	0	30.8642	106.301	HRAS
phasic smooth muscle contraction (GO:0014821)	1/12	0.0319316	0.676129	0	0	30.8642	106.301	DRD2
negative regulation of substrate adhesion-dependent cell spreading (GO:1900025)	1/12	0.0319316	0.678946	0	0	30.8642	106.301	ACTN4
alternative mRNA splicing, via spliceosome (GO:0000380)	1/12	0.0319316	0.681787	0	0	30.8642	106.301	CELF4
positive regulation of potassium ion transmembrane transporter activity (GO:1901018)	1/12	0.0319316	0.684652	0	0	30.8642	106.301	ANK2
regulation of T cell differentiation in thymus (GO:0033081)	1/12	0.0319316	0.68754	0	0	30.8642	106.301	SOD1
positive regulation of cyclase activity (GO:0031281)	1/12	0.0319316	0.690454	0	0	30.8642	106.301	MAPK3
entry of bacterium into host cell (GO:0035635)	1/12	0.0319316	0.693392	0	0	30.8642	106.301	MET
activation of cysteine-type endopeptidase activity (GO:0097202)	1/12	0.0319316	0.696355	0	0	30.8642	106.301	GRIN2A
regulation of systemic arterial blood pressure (GO:0003073)	1/12	0.0319316	0.699344	0	0	30.8642	106.301	DRD2
peptide metabolic process (GO:0006518)	2/104	0.0321605	0.672603	0	0	7.12251	24.4802	GPX1;SOD1
regulation of cellular response to stress (GO:0080135)	2/104	0.0321605	0.675371	0	0	7.12251	24.4802	CAMK2B;MAPK3
positive regulation of programmed cell death (GO:0043068)	3/257	0.0321756	0.670171	0	0	4.32339	14.8575	NTRK1;APBB1;SOD1
mRNA splicing, via spliceosome (GO:0000398)	3/261	0.0334568	0.694024	0	0	4.25713	14.4636	CELF4;SF3B1;SRSF11
regulation of protein secretion (GO:0050708)	2/107	0.0338786	0.699929	0	0	6.92281	23.4335	SNAP25;DRD2
regulation of synaptic vesicle transport (GO:1902803)	1/13	0.034547	0.665257	0	0	28.49	95.8814	SYN1
phospholipase C-activating dopamine receptor signaling pathway (GO:0060158)	1/13	0.034547	0.667777	0	0	28.49	95.8814	DRD2
cellular potassium ion homeostasis (GO:0030007)	1/13	0.034547	0.670316	0	0	28.49	95.8814	ATP1A3
positive regulation of endothelial cell chemotaxis (GO:2001028)	1/13	0.034547	0.672875	0	0	28.49	95.8814	MET
negative regulation of voltage-gated calcium channel activity (GO:1901386)	1/13	0.034547	0.675453	0	0	28.49	95.8814	DRD2
positive regulation of cholesterol efflux (GO:0010875)	1/13	0.034547	0.678051	0	0	28.49	95.8814	LRP1
atrial septum development (GO:0003283)	1/13	0.034547	0.680669	0	0	28.49	95.8814	ANK2
sodium ion export (GO:0071436)	1/13	0.034547	0.683307	0	0	28.49	95.8814	ATP1A3
placenta development (GO:0001890)	1/13	0.034547	0.685966	0	0	28.49	95.8814	SOD1
myelination in peripheral nervous system (GO:0022011)	1/13	0.034547	0.688645	0	0	28.49	95.8814	SOD1
negative regulation of blood pressure (GO:0045776)	1/13	0.034547	0.691346	0	0	28.49	95.8814	DRD2
muscle cell development (GO:0055001)	1/13	0.034547	0.694068	0	0	28.49	95.8814	ANK2
regulation of neurotransmitter transport (GO:0051588)	1/13	0.034547	0.696811	0	0	28.49	95.8814	SYN1
regulation of superoxide anion generation (GO:0032928)	1/13	0.034547	0.699576	0	0	28.49	95.8814	SOD1
atrial cardiac muscle cell action potential (GO:0086014)	1/13	0.034547	0.702363	0	0	28.49	95.8814	ANK2
regulation of endothelial cell chemotaxis (GO:2001026)	1/13	0.034547	0.705173	0	0	28.49	95.8814	MET
sodium ion export from cell (GO:0036376)	1/13	0.034547	0.708005	0	0	28.49	95.8814	ATP1A3
protein localization to endoplasmic reticulum (GO:0070972)	1/13	0.034547	0.71086	0	0	28.49	95.8814	ANK2
phosphatidylinositol metabolic process (GO:0046488)	2/112	0.03682	0.706363	0	0	6.61376	21.8367	EFR3A;SBF1
neuromuscular process controlling balance (GO:0050885)	1/14	0.0371554	0.674747	0	0	26.455	87.1071	NRXN1
hydrogen peroxide catabolic process (GO:0042744)	1/14	0.0371554	0.677157	0	0	26.455	87.1071	GPX1
thymus development (GO:0048538)	1/14	0.0371554	0.679584	0	0	26.455	87.1071	SOD1
pyrimidine-containing compound catabolic process (GO:0072529)	1/14	0.0371554	0.682028	0	0	26.455	87.1071	TET2
cell communication by electrical coupling involved in cardiac conduction (GO:0086064)	1/14	0.0371554	0.684491	0	0	26.455	87.1071	ATP1A3
negative regulation of smooth muscle cell migration (GO:0014912)	1/14	0.0371554	0.686971	0	0	26.455	87.1071	LRP1
negative regulation of Rho protein signal transduction (GO:0035024)	1/14	0.0371554	0.689469	0	0	26.455	87.1071	MET
regulation of extracellular matrix disassembly (GO:0010715)	1/14	0.0371554	0.691985	0	0	26.455	87.1071	LRP1
regulation of synapse organization (GO:0050807)	1/14	0.0371554	0.69452	0	0	26.455	87.1071	CAMK2B
clathrin coat assembly (GO:0048268)	1/14	0.0371554	0.697073	0	0	26.455	87.1071	AP2S1
regulation of Golgi organization (GO:1903358)	1/14	0.0371554	0.699645	0	0	26.455	87.1071	MAPK3
positive regulation of neural precursor cell proliferation (GO:2000179)	1/14	0.0371554	0.702237	0	0	26.455	87.1071	DRD2
regulation of ventricular cardiac muscle cell membrane repolarization (GO:0060307)	1/14	0.0371554	0.704847	0	0	26.455	87.1071	ANK2
negative regulation of hydrogen peroxide-induced cell death (GO:1903206)	1/14	0.0371554	0.707477	0	0	26.455	87.1071	MET
neuron cell-cell adhesion (GO:0007158)	1/14	0.0371554	0.710127	0	0	26.455	87.1071	NRXN1
positive regulation of kinase activity (GO:0033674)	2/113	0.0374198	0.677139	0	0	6.55523	21.5376	NTRK1;MET
negative regulation of cell growth (GO:0030308)	2/115	0.0386306	0.69658	0	0	6.44122	20.9579	APBB1;PPP1R9B
fatty acid beta-oxidation using acyl-CoA dehydrogenase (GO:0033539)	1/15	0.0397569	0.676264	0	0	24.6914	79.629	ETFB
cellular sodium ion homeostasis (GO:0006883)	1/15	0.0397569	0.678526	0	0	24.6914	79.629	ATP1A3
negative regulation of release of cytochrome c from mitochondria (GO:0090201)	1/15	0.0397569	0.680803	0	0	24.6914	79.629	GPX1
mitotic chromosome condensation (GO:0007076)	1/15	0.0397569	0.683095	0	0	24.6914	79.629	CHMP1A
positive regulation of potassium ion transport (GO:0043268)	1/15	0.0397569	0.685403	0	0	24.6914	79.629	ANK2
JAK-STAT cascade involved in growth hormone signaling pathway (GO:0060397)	1/15	0.0397569	0.687727	0	0	24.6914	79.629	MAPK3
ventricular cardiac muscle cell action potential (GO:0086005)	1/15	0.0397569	0.690066	0	0	24.6914	79.629	ANK2
positive regulation of potassium ion transmembrane transport (GO:1901381)	1/15	0.0397569	0.692421	0	0	24.6914	79.629	ANK2
lipoxygenase pathway (GO:0019372)	1/15	0.0397569	0.694792	0	0	24.6914	79.629	GPX1
filopodium assembly (GO:0046847)	1/15	0.0397569	0.69718	0	0	24.6914	79.629	PPP1R9B
positive regulation of small GTPase mediated signal transduction (GO:0051057)	1/15	0.0397569	0.699584	0	0	24.6914	79.629	NTRK1
negative regulation of platelet-derived growth factor receptor signaling pathway (GO:0010642)	1/15	0.0397569	0.702005	0	0	24.6914	79.629	LRP1
autonomic nervous system development (GO:0048483)	1/15	0.0397569	0.704442	0	0	24.6914	79.629	NTRK1
positive regulation of response to wounding (GO:1903036)	1/15	0.0397569	0.706897	0	0	24.6914	79.629	HRAS
catecholamine metabolic process (GO:0006584)	1/15	0.0397569	0.709368	0	0	24.6914	79.629	DRD2
regulation of exit from mitosis (GO:0007096)	1/15	0.0397569	0.711857	0	0	24.6914	79.629	PPP1R9B
positive regulation of peptidyl-lysine acetylation (GO:2000758)	1/15	0.0397569	0.714364	0	0	24.6914	79.629	MAPK3
activation of MAPK activity (GO:0000187)	2/117	0.0398564	0.675704	0	0	6.33112	20.4019	MAPK3;SOD1
positive regulation of intracellular signal transduction (GO:1902533)	4/479	0.0401584	0.67857	0	0	3.09286	9.94332	NTRK1;ACTN4;HRAS;MET
negative regulation of signal transduction (GO:0009968)	3/283	0.0409734	0.690058	0	0	3.92619	12.5435	NTRK1;LRP1;MET
regulation of neuron projection development (GO:0010975)	2/119	0.0410968	0.689859	0	0	6.22471	19.8682	CAMK2B;NTRK1
negative regulation of growth (GO:0045926)	2/120	0.0417225	0.698065	0	0	6.17284	19.6093	APBB1;PPP1R9B
neurotransmitter transport (GO:0006836)	1/16	0.0423515	0.681765	0	0	23.1481	73.1887	SNAP25
activation of protein kinase A activity (GO:0034199)	1/16	0.0423515	0.683923	0	0	23.1481	73.1887	ADCY5
aorta morphogenesis (GO:0035909)	1/16	0.0423515	0.686094	0	0	23.1481	73.1887	LRP1
positive regulation of mRNA processing (GO:0050685)	1/16	0.0423515	0.688279	0	0	23.1481	73.1887	CELF4
negative regulation of steroid biosynthetic process (GO:0010894)	1/16	0.0423515	0.690478	0	0	23.1481	73.1887	SOD1
neuromuscular process (GO:0050905)	1/16	0.0423515	0.692691	0	0	23.1481	73.1887	NRXN1
sympathetic nervous system development (GO:0048485)	1/16	0.0423515	0.694918	0	0	23.1481	73.1887	NTRK1
regulation of water loss via skin (GO:0033561)	1/16	0.0423515	0.69716	0	0	23.1481	73.1887	MET
regulation of dopamine secretion (GO:0014059)	1/16	0.0423515	0.699416	0	0	23.1481	73.1887	DRD2
positive regulation of dendrite morphogenesis (GO:0050775)	1/16	0.0423515	0.701687	0	0	23.1481	73.1887	CAMK2B
establishment of skin barrier (GO:0061436)	1/16	0.0423515	0.703972	0	0	23.1481	73.1887	MET
postsynaptic membrane organization (GO:0001941)	1/16	0.0423515	0.706273	0	0	23.1481	73.1887	NRXN1
negative regulation of cell migration (GO:0030336)	2/121	0.0423518	0.679626	0	0	6.12182	19.3556	LRP1;DRD2
ion transport (GO:0006811)	3/289	0.0431602	0.690428	0	0	3.84468	12.0832	GABRB2;GABRA3;ATP1A3
regulation of transcription from RNA polymerase II promoter (GO:0006357)	8/1478	0.0436125	0.695484	0	0	2.00471	6.27958	MBD3;TSHZ3;TET2;NR2F1;APBB1;HRAS;MET;MAPK3
platelet degranulation (GO:0002576)	2/124	0.0442611	0.703627	0	0	5.97372	18.624	ACTN4;SOD1
G-protein coupled receptor signaling pathway, coupled to cyclic nucleotide second messenger (GO:0007187)	2/125	0.0449046	0.71164	0	0	5.92593	18.3894	ADORA2A;DRD2
negative regulation of phosphoprotein phosphatase activity (GO:0032515)	1/17	0.0449392	0.67054	0	0	21.7865	67.5914	PPP1R1B
negative regulation of stress fiber assembly (GO:0051497)	1/17	0.0449392	0.672506	0	0	21.7865	67.5914	MET
membrane depolarization during cardiac muscle cell action potential (GO:0086012)	1/17	0.0449392	0.674484	0	0	21.7865	67.5914	ANK2
cellular monovalent inorganic cation homeostasis (GO:0030004)	1/17	0.0449392	0.676474	0	0	21.7865	67.5914	ATP1A3
positive regulation of stem cell proliferation (GO:2000648)	1/17	0.0449392	0.678475	0	0	21.7865	67.5914	DRD2
positive regulation of cation transmembrane transport (GO:1904064)	1/17	0.0449392	0.680489	0	0	21.7865	67.5914	ANK2
regulation of early endosome to late endosome transport (GO:2000641)	1/17	0.0449392	0.682514	0	0	21.7865	67.5914	MAPK3
positive regulation of telomere capping (GO:1904355)	1/17	0.0449392	0.684551	0	0	21.7865	67.5914	MAPK3
positive chemotaxis (GO:0050918)	1/17	0.0449392	0.686601	0	0	21.7865	67.5914	MET
regulation of cardiac muscle contraction by regulation of the release of sequestered calcium ion (GO:0010881)	1/17	0.0449392	0.688663	0	0	21.7865	67.5914	ANK2
neurotrophin signaling pathway (GO:0038179)	1/17	0.0449392	0.690737	0	0	21.7865	67.5914	NTRK1
mRNA cis splicing, via spliceosome (GO:0045292)	1/17	0.0449392	0.692824	0	0	21.7865	67.5914	PRPF39
regulation of synaptic vesicle exocytosis (GO:2000300)	1/17	0.0449392	0.694923	0	0	21.7865	67.5914	SYN1
cardiac muscle cell contraction (GO:0086003)	1/17	0.0449392	0.697035	0	0	21.7865	67.5914	SCN1A
cellular response to gamma radiation (GO:0071480)	1/17	0.0449392	0.699161	0	0	21.7865	67.5914	HRAS
positive regulation of calcium ion transmembrane transporter activity (GO:1901021)	1/17	0.0449392	0.701299	0	0	21.7865	67.5914	ANK2
embryo development ending in birth or egg hatching (GO:0009792)	1/17	0.0449392	0.70345	0	0	21.7865	67.5914	CELF4
positive regulation of cholesterol transport (GO:0032376)	1/17	0.0449392	0.705614	0	0	21.7865	67.5914	LRP1
regulation of multicellular organism growth (GO:0040014)	1/17	0.0449392	0.707792	0	0	21.7865	67.5914	SOD1
peptidyl-lysine trimethylation (GO:0018023)	1/17	0.0449392	0.709983	0	0	21.7865	67.5914	TET2
negative regulation of response to stimulus (GO:0048585)	2/127	0.046202	0.687373	0	0	5.8326	17.9337	NTRK1;MET
regulation of macromolecule metabolic process (GO:0060255)	2/129	0.0475132	0.704826	0	0	5.74218	17.495	LRP1;MAPK3
negative regulation of protein dephosphorylation (GO:0035308)	1/18	0.04752	0.688906	0	0	20.5761	62.6873	PPP1R1B
snRNA metabolic process (GO:0016073)	1/18	0.04752	0.690868	0	0	20.5761	62.6873	INTS1
regulation of oxidative stress-induced intrinsic apoptotic signaling pathway (GO:1902175)	1/18	0.04752	0.692842	0	0	20.5761	62.6873	SOD1
regulation of smooth muscle cell migration (GO:0014910)	1/18	0.04752	0.694827	0	0	20.5761	62.6873	LRP1
negative regulation of protein transport (GO:0051224)	1/18	0.04752	0.696824	0	0	20.5761	62.6873	DRD2
positive regulation of actin cytoskeleton reorganization (GO:2000251)	1/18	0.04752	0.698832	0	0	20.5761	62.6873	HRAS
regulation of cardiac muscle cell membrane repolarization (GO:0099623)	1/18	0.04752	0.700852	0	0	20.5761	62.6873	ANK2
regulation of cholesterol efflux (GO:0010874)	1/18	0.04752	0.702883	0	0	20.5761	62.6873	LRP1
cyclic nucleotide biosynthetic process (GO:0009190)	1/19	0.050094	0.71605	0	0	19.4932	58.3597	ADCY5
endothelial cell development (GO:0001885)	1/19	0.050094	0.718061	0	0	19.4932	58.3597	MET
calcium ion transport into cytosol (GO:0060402)	1/19	0.050094	0.720084	0	0	19.4932	58.3597	GRIN2A
positive regulation of excitatory postsynaptic potential (GO:2000463)	1/19	0.050094	0.722118	0	0	19.4932	58.3597	NRXN1
regulation of mitotic spindle assembly (GO:1901673)	1/19	0.050094	0.724164	0	0	19.4932	58.3597	CHMP1A
phagocytosis (GO:0006909)	2/135	0.0515278	0.734488	0	0	5.48697	16.2723	ADORA2A;LRP1
growth hormone receptor signaling pathway (GO:0060396)	1/20	0.0526612	0.71853	0	0	18.5185	54.5162	MAPK3
cellular response to steroid hormone stimulus (GO:0071383)	1/20	0.0526612	0.720456	0	0	18.5185	54.5162	ATP1A3
negative regulation of adenylate cyclase activity (GO:0007194)	1/20	0.0526612	0.722393	0	0	18.5185	54.5162	DRD2
adenylate cyclase-activating adrenergic receptor signaling pathway (GO:0071880)	1/20	0.0526612	0.72434	0	0	18.5185	54.5162	DRD2
dopamine metabolic process (GO:0042417)	1/20	0.0526612	0.726298	0	0	18.5185	54.5162	DRD2
eye morphogenesis (GO:0048592)	1/20	0.0526612	0.728266	0	0	18.5185	54.5162	C12ORF57
regulation of calcium ion transmembrane transport (GO:1903169)	1/20	0.0526612	0.730245	0	0	18.5185	54.5162	ANK2
vesicle cytoskeletal trafficking (GO:0099518)	1/20	0.0526612	0.732235	0	0	18.5185	54.5162	ACTN4
regulation of cholesterol transport (GO:0032374)	1/20	0.0526612	0.734236	0	0	18.5185	54.5162	LRP1
negative regulation of cyclase activity (GO:0031280)	1/20	0.0526612	0.736247	0	0	18.5185	54.5162	DRD2
adrenergic receptor signaling pathway (GO:0071875)	1/20	0.0526612	0.73827	0	0	18.5185	54.5162	DRD2
viral budding via host ESCRT complex (GO:0039702)	1/20	0.0526612	0.740304	0	0	18.5185	54.5162	CHMP1A
negative regulation of actin filament bundle assembly (GO:0032232)	1/20	0.0526612	0.742349	0	0	18.5185	54.5162	MET
negative regulation of macromolecule biosynthetic process (GO:0010558)	1/20	0.0526612	0.744405	0	0	18.5185	54.5162	APBB1
positive regulation of dendritic spine development (GO:0060999)	1/20	0.0526612	0.746473	0	0	18.5185	54.5162	CAMK2B
covalent chromatin modification (GO:0016569)	1/20	0.0526612	0.748552	0	0	18.5185	54.5162	MBD3
regulation of cytosolic calcium ion concentration (GO:0051480)	2/137	0.0528924	0.71976	0	0	5.40687	15.8935	DRD2;ADCY5
regulation of vesicle-mediated transport (GO:0060627)	2/138	0.0535796	0.727172	0	0	5.36769	15.709	AP2S1;MAPK3
regulation of cell migration (GO:0030334)	3/316	0.0537102	0.727011	0	0	3.51617	10.2818	ACTN4;DRD2;HRAS
positive regulation of histone acetylation (GO:0035066)	1/21	0.0552216	0.737685	0	0	17.6367	51.0829	MAPK3
negative regulation of cAMP biosynthetic process (GO:0030818)	1/21	0.0552216	0.739621	0	0	17.6367	51.0829	DRD2
regulation of cardiac muscle contraction by calcium ion signaling (GO:0010882)	1/21	0.0552216	0.741568	0	0	17.6367	51.0829	ANK2
regulation of ruffle assembly (GO:1900027)	1/21	0.0552216	0.743524	0	0	17.6367	51.0829	HRAS
positive regulation of cellular component movement (GO:0051272)	1/21	0.0552216	0.745491	0	0	17.6367	51.0829	ACTN4
positive regulation of gene expression (GO:0010628)	5/771	0.0563897	0.751323	0	0	2.40188	6.90654	CD38;ANK2;APBB1;SF3B1;MAPK3
regulation of insulin secretion involved in cellular response to glucose stimulus (GO:0061178)	1/22	0.0577752	0.754032	0	0	16.835	47.9999	ADCY5
protein localization to cell surface (GO:0034394)	1/22	0.0577752	0.755966	0	0	16.835	47.9999	ANK2
negative regulation of lyase activity (GO:0051350)	1/22	0.0577752	0.757909	0	0	16.835	47.9999	DRD2
positive regulation of RNA splicing (GO:0033120)	1/22	0.0577752	0.759863	0	0	16.835	47.9999	CELF4
negative regulation of GTPase activity (GO:0034260)	1/22	0.0577752	0.761826	0	0	16.835	47.9999	HRAS
regulation of catecholamine secretion (GO:0050433)	1/22	0.0577752	0.7638	0	0	16.835	47.9999	DRD2
cellular response to nerve growth factor stimulus (GO:1990090)	1/22	0.0577752	0.765784	0	0	16.835	47.9999	NTRK1
regulation of calcium ion transport into cytosol (GO:0010522)	1/22	0.0577752	0.767778	0	0	16.835	47.9999	ANK2
NAD metabolic process (GO:0019674)	1/23	0.060322	0.760057	0	0	16.1031	45.2183	CD38
membrane assembly (GO:0071709)	1/23	0.060322	0.761938	0	0	16.1031	45.2183	NRXN1
viral budding (GO:0046755)	1/23	0.060322	0.763829	0	0	16.1031	45.2183	CHMP1A
positive regulation of ion transmembrane transporter activity (GO:0032414)	1/23	0.060322	0.765729	0	0	16.1031	45.2183	ANK2
regulation of release of sequestered calcium ion into cytosol by sarcoplasmic reticulum (GO:0010880)	1/23	0.060322	0.767638	0	0	16.1031	45.2183	ANK2
divalent inorganic cation homeostasis (GO:0072507)	1/23	0.060322	0.769558	0	0	16.1031	45.2183	CADPS2
response to alkaloid (GO:0043279)	1/23	0.060322	0.771486	0	0	16.1031	45.2183	DRD2
histone H3-K4 methylation (GO:0051568)	1/23	0.060322	0.773425	0	0	16.1031	45.2183	TET2
regulation of proteolysis involved in cellular protein catabolic process (GO:1903050)	1/23	0.060322	0.775373	0	0	16.1031	45.2183	GPX1
regulation of dendritic spine morphogenesis (GO:0061001)	1/23	0.060322	0.777331	0	0	16.1031	45.2183	CAMK2B
regulation of telomere capping (GO:1904353)	1/23	0.060322	0.779299	0	0	16.1031	45.2183	MAPK3
neuronal action potential (GO:0019228)	1/23	0.060322	0.781277	0	0	16.1031	45.2183	SCN1A
chromosome condensation (GO:0030261)	1/23	0.060322	0.783265	0	0	16.1031	45.2183	CHMP1A
cellular response to catecholamine stimulus (GO:0071870)	1/23	0.060322	0.785263	0	0	16.1031	45.2183	MAPK3
regulated exocytosis (GO:0045055)	2/148	0.0606237	0.761977	0	0	5.00501	14.0294	ACTN4;SOD1
cellular senescence (GO:0090398)	1/24	0.062862	0.769268	0	0	15.4321	42.6977	HRAS
cGMP biosynthetic process (GO:0006182)	1/24	0.062862	0.771117	0	0	15.4321	42.6977	ADCY5
regulation of cardiac muscle cell action potential (GO:0098901)	1/24	0.062862	0.772976	0	0	15.4321	42.6977	ANK2
mRNA splice site selection (GO:0006376)	1/24	0.062862	0.774843	0	0	15.4321	42.6977	PRPF39
sensory perception of pain (GO:0019233)	1/24	0.062862	0.776719	0	0	15.4321	42.6977	SCN1A
positive regulation of microtubule polymerization or depolymerization (GO:0031112)	1/24	0.062862	0.778604	0	0	15.4321	42.6977	MET
receptor catabolic process (GO:0032801)	1/24	0.062862	0.780498	0	0	15.4321	42.6977	AP2S1
camera-type eye development (GO:0043010)	1/24	0.062862	0.782402	0	0	15.4321	42.6977	C12ORF57
negative regulation of sequestering of calcium ion (GO:0051283)	1/24	0.062862	0.784315	0	0	15.4321	42.6977	DRD2
receptor clustering (GO:0043113)	1/24	0.062862	0.786237	0	0	15.4321	42.6977	NRXN1
positive regulation of microtubule polymerization (GO:0031116)	1/24	0.062862	0.788169	0	0	15.4321	42.6977	MET
modulation of excitatory postsynaptic potential (GO:0098815)	1/25	0.0653953	0.783362	0	0	14.8148	40.4045	NRXN1
positive regulation of calcium ion transmembrane transport (GO:1904427)	1/25	0.0653953	0.785205	0	0	14.8148	40.4045	ANK2
RNA splicing, via transesterification reactions (GO:0000375)	1/25	0.0653953	0.787057	0	0	14.8148	40.4045	SF3B1
potassium ion homeostasis (GO:0055075)	1/25	0.0653953	0.788918	0	0	14.8148	40.4045	ATP1A3
cyclic nucleotide metabolic process (GO:0009187)	1/25	0.0653953	0.790788	0	0	14.8148	40.4045	ADCY5
regulation of spindle assembly (GO:0090169)	1/25	0.0653953	0.792666	0	0	14.8148	40.4045	CHMP1A
regulation of voltage-gated calcium channel activity (GO:1901385)	1/25	0.0653953	0.794553	0	0	14.8148	40.4045	DRD2
regulation of potassium ion transmembrane transporter activity (GO:1901016)	1/25	0.0653953	0.796449	0	0	14.8148	40.4045	ANK2
regulation of centrosome duplication (GO:0010824)	1/25	0.0653953	0.798355	0	0	14.8148	40.4045	CHMP1A
regulation of supramolecular fiber organization (GO:1902903)	1/26	0.0679219	0.791337	0	0	14.245	38.3105	GPX1
snRNA 3'-end processing (GO:0034472)	1/26	0.0679219	0.793148	0	0	14.245	38.3105	INTS1
positive regulation of wound healing (GO:0090303)	1/26	0.0679219	0.794967	0	0	14.245	38.3105	HRAS
nucleotide biosynthetic process (GO:0009165)	1/26	0.0679219	0.796794	0	0	14.245	38.3105	ADCY5
regulation of centrosome cycle (GO:0046605)	1/26	0.0679219	0.79863	0	0	14.245	38.3105	CHMP1A
snRNA processing (GO:0016180)	1/26	0.0679219	0.800475	0	0	14.245	38.3105	INTS1
response to gamma radiation (GO:0010332)	1/26	0.0679219	0.802328	0	0	14.245	38.3105	HRAS
regulation of histone acetylation (GO:0035065)	1/26	0.0679219	0.804189	0	0	14.245	38.3105	MAPK3
regulation of cardiac muscle cell contraction (GO:0086004)	1/26	0.0679219	0.806059	0	0	14.245	38.3105	ANK2
positive regulation of synapse assembly (GO:0051965)	1/26	0.0679219	0.807938	0	0	14.245	38.3105	NRXN1
apoptotic cell clearance (GO:0043277)	1/26	0.0679219	0.809826	0	0	14.245	38.3105	LRP1
sodium ion homeostasis (GO:0055078)	1/26	0.0679219	0.811722	0	0	14.245	38.3105	ATP1A3
release of sequestered calcium ion into cytosol (GO:0051209)	1/27	0.0704418	0.811432	0	0	13.7174	36.3919	DRD2
regulation of neurotransmitter secretion (GO:0046928)	1/27	0.0704418	0.813268	0	0	13.7174	36.3919	SYN1
negative regulation of synaptic transmission (GO:0050805)	1/27	0.0704418	0.815112	0	0	13.7174	36.3919	DRD2
phosphatidylinositol phosphorylation (GO:0046854)	1/27	0.0704418	0.816965	0	0	13.7174	36.3919	EFR3A
regulation of calcium ion transmembrane transporter activity (GO:1901019)	1/27	0.0704418	0.818826	0	0	13.7174	36.3919	ANK2
regulation of protein kinase B signaling (GO:0051896)	2/163	0.0717445	0.822724	0	0	4.54442	11.9729	DRD2;MET
neuron projection morphogenesis (GO:0048812)	2/163	0.0717445	0.824577	0	0	4.54442	11.9729	APBB1;DRD2
regulation of adenylate cyclase activity (GO:0045761)	1/28	0.072955	0.825475	0	0	13.2275	34.6285	DRD2
regulation of defense response to virus by virus (GO:0050690)	1/28	0.072955	0.82731	0	0	13.2275	34.6285	AP2S1
dopamine receptor signaling pathway (GO:0007212)	1/28	0.072955	0.829152	0	0	13.2275	34.6285	DRD2
cGMP metabolic process (GO:0046068)	1/28	0.072955	0.831003	0	0	13.2275	34.6285	ADCY5
regulation of NIK/NF-kappaB signaling (GO:1901222)	1/28	0.072955	0.832862	0	0	13.2275	34.6285	ACTN4
cellular response to ketone (GO:1901655)	1/28	0.072955	0.834729	0	0	13.2275	34.6285	ADCY5
negative regulation of cell proliferation (GO:0008285)	3/363	0.0747307	0.843696	0	0	3.06091	7.93959	NTRK1;DRD2;HRAS
amino acid transmembrane transport (GO:0003333)	1/29	0.0754615	0.840786	0	0	12.7714	33.003	SLC38A10
semaphorin-plexin signaling pathway (GO:0071526)	1/29	0.0754615	0.842626	0	0	12.7714	33.003	MET
positive regulation of histone modification (GO:0031058)	1/29	0.0754615	0.844474	0	0	12.7714	33.003	MAPK3
protein alkylation (GO:0008213)	1/29	0.0754615	0.84633	0	0	12.7714	33.003	ETFB
superoxide metabolic process (GO:0006801)	1/29	0.0754615	0.848194	0	0	12.7714	33.003	SOD1
cellular response to cadmium ion (GO:0071276)	1/29	0.0754615	0.850066	0	0	12.7714	33.003	MAPK3
regulation of cation transmembrane transport (GO:1904062)	1/30	0.0779614	0.848266	0	0	12.3457	31.5005	DPP10
negative regulation of cell morphogenesis involved in differentiation (GO:0010771)	1/30	0.0779614	0.850079	0	0	12.3457	31.5005	ACTN4
multivesicular body assembly (GO:0036258)	1/30	0.0779614	0.851899	0	0	12.3457	31.5005	CHMP1A
negative regulation of secretion by cell (GO:1903531)	1/30	0.0779614	0.853727	0	0	12.3457	31.5005	DRD2
positive regulation of B cell proliferation (GO:0030890)	1/30	0.0779614	0.855563	0	0	12.3457	31.5005	CD38
ATP-dependent chromatin remodeling (GO:0043044)	1/30	0.0779614	0.857407	0	0	12.3457	31.5005	MBD3
artery morphogenesis (GO:0048844)	1/30	0.0779614	0.859259	0	0	12.3457	31.5005	LRP1
negative regulation of cation channel activity (GO:2001258)	1/30	0.0779614	0.861119	0	0	12.3457	31.5005	DRD2
regulation of developmental growth (GO:0048638)	1/30	0.0779614	0.862987	0	0	12.3457	31.5005	SOD1
positive regulation of cation channel activity (GO:2001259)	1/30	0.0779614	0.864863	0	0	12.3457	31.5005	ANK2
regulation of actin cytoskeleton reorganization (GO:2000249)	1/30	0.0779614	0.866747	0	0	12.3457	31.5005	HRAS
positive regulation of hydrolase activity (GO:0051345)	2/172	0.0787119	0.85461	0	0	4.30663	10.9473	NTRK1;HRAS
positive regulation of transcription, DNA-templated (GO:0045893)	6/1120	0.0802135	0.869065	0	0	1.98413	5.00608	TET2;CD38;APBB1;HRAS;MET;MAPK3
multivesicular body organization (GO:0036257)	1/31	0.0804546	0.860713	0	0	11.9474	30.1083	CHMP1A
negative regulation of extrinsic apoptotic signaling pathway via death domain receptors (GO:1902042)	1/31	0.0804546	0.862521	0	0	11.9474	30.1083	GPX1
anterograde axonal transport (GO:0008089)	1/31	0.0804546	0.864337	0	0	11.9474	30.1083	SOD1
renal water homeostasis (GO:0003091)	1/31	0.0804546	0.86616	0	0	11.9474	30.1083	ADCY5
response to cadmium ion (GO:0046686)	1/31	0.0804546	0.867991	0	0	11.9474	30.1083	MAPK3
regulation of dendritic spine development (GO:0060998)	1/31	0.0804546	0.86983	0	0	11.9474	30.1083	CAMK2B
transmembrane transport (GO:0055085)	3/378	0.0821095	0.876579	0	0	2.93945	7.34774	GABRB2;GABRA3;ATP1A3
regulation of potassium ion transmembrane transport (GO:1901379)	1/32	0.0829412	0.872679	0	0	11.5741	28.8151	DPP10
cyclic-nucleotide-mediated signaling (GO:0019935)	1/32	0.0829412	0.874482	0	0	11.5741	28.8151	ADCY5
positive regulation of telomere maintenance (GO:0032206)	1/32	0.0829412	0.876292	0	0	11.5741	28.8151	MAPK3
positive regulation of telomere maintenance via telomerase (GO:0032212)	1/32	0.0829412	0.87811	0	0	11.5741	28.8151	MAPK3
cellular response to glucagon stimulus (GO:0071377)	1/32	0.0829412	0.879936	0	0	11.5741	28.8151	ADCY5
negative regulation of calcium ion transmembrane transporter activity (GO:1901020)	1/32	0.0829412	0.881769	0	0	11.5741	28.8151	DRD2
activation of adenylate cyclase activity (GO:0007190)	1/32	0.0829412	0.88361	0	0	11.5741	28.8151	ADCY5
cellular response to lipid (GO:0071396)	2/178	0.083471	0.876445	0	0	4.16146	10.334	ATP1A3;ADCY5
positive regulation of cell motility (GO:2000147)	2/179	0.0842727	0.883046	0	0	4.13822	10.2367	ACTN4;HRAS
negative regulation of gene expression (GO:0010629)	4/618	0.0852076	0.891013	0	0	2.39722	5.90355	TSHZ3;CHMP1A;CD38;HRAS
transcription initiation from RNA polymerase I promoter (GO:0006361)	1/33	0.0854213	0.877072	0	0	11.2233	27.6112	MAPK3
positive regulation of intrinsic apoptotic signaling pathway (GO:2001244)	1/33	0.0854213	0.87884	0	0	11.2233	27.6112	SOD1
positive regulation of calcium ion transport (GO:0051928)	1/33	0.0854213	0.880616	0	0	11.2233	27.6112	ANK2
negative regulation of mitochondrion organization (GO:0010823)	1/33	0.0854213	0.882398	0	0	11.2233	27.6112	GPX1
entry into host cell (GO:0030260)	1/33	0.0854213	0.884188	0	0	11.2233	27.6112	MET
regulation of T cell differentiation (GO:0045580)	1/33	0.0854213	0.885985	0	0	11.2233	27.6112	SOD1
activation of MAPKK activity (GO:0000186)	1/33	0.0854213	0.88779	0	0	11.2233	27.6112	NTRK1
positive regulation of adenylate cyclase activity (GO:0045762)	1/33	0.0854213	0.889601	0	0	11.2233	27.6112	ADCY5
transcription from RNA polymerase I promoter (GO:0006360)	1/33	0.0854213	0.891421	0	0	11.2233	27.6112	MAPK3
phosphorylation (GO:0016310)	3/386	0.0861705	0.882988	0	0	2.87853	7.0565	CAMK2B;NTRK1;MAPK3
Fc-epsilon receptor signaling pathway (GO:0038095)	2/182	0.0866921	0.886553	0	0	4.07	9.95276	HRAS;MAPK3
Fc receptor signaling pathway (GO:0038093)	2/183	0.0875033	0.893058	0	0	4.04776	9.86067	HRAS;MAPK3
positive regulation of telomere maintenance via telomere lengthening (GO:1904358)	1/34	0.0878947	0.888172	0	0	10.8932	26.4882	MAPK3
response to glucagon (GO:0033762)	1/34	0.0878947	0.889934	0	0	10.8932	26.4882	ADCY5
regulation of wound healing (GO:0061041)	1/34	0.0878947	0.891703	0	0	10.8932	26.4882	HRAS
positive regulation of cytokinesis (GO:0032467)	1/34	0.0878947	0.893479	0	0	10.8932	26.4882	DRD2
epithelial tube morphogenesis (GO:0060562)	1/34	0.0878947	0.895263	0	0	10.8932	26.4882	MET
DNA-templated transcription, initiation (GO:0006352)	2/186	0.0899506	0.90715	0	0	3.98248	9.59178	NR2F1;MAPK3
regulation of sodium ion transport (GO:0002028)	1/35	0.0903616	0.885058	0	0	10.582	25.4385	DRD2
regulation of cardiac muscle contraction (GO:0055117)	1/35	0.0903616	0.88676	0	0	10.582	25.4385	ANK2
regulation of mitotic spindle organization (GO:0060236)	1/35	0.0903616	0.888468	0	0	10.582	25.4385	CHMP1A
positive regulation of telomerase activity (GO:0051973)	1/35	0.0903616	0.890184	0	0	10.582	25.4385	MAPK3
carboxylic acid transmembrane transport (GO:1905039)	1/35	0.0903616	0.891906	0	0	10.582	25.4385	SLC38A10
regulation of phosphoprotein phosphatase activity (GO:0043666)	1/35	0.0903616	0.893634	0	0	10.582	25.4385	PPP1R1B
positive regulation of DNA replication (GO:0045740)	1/35	0.0903616	0.895369	0	0	10.582	25.4385	HRAS
regulation of synapse assembly (GO:0051963)	1/35	0.0903616	0.897111	0	0	10.582	25.4385	NRXN1
regulation of microtubule polymerization (GO:0031113)	1/35	0.0903616	0.89886	0	0	10.582	25.4385	MET
negative regulation of protein kinase B signaling (GO:0051898)	1/35	0.0903616	0.900616	0	0	10.582	25.4385	DRD2
negative regulation of cell-substrate adhesion (GO:0010812)	1/35	0.0903616	0.902378	0	0	10.582	25.4385	ACTN4
positive regulation of NIK/NF-kappaB signaling (GO:1901224)	1/35	0.0903616	0.904147	0	0	10.582	25.4385	ACTN4
regulation of heart rate by cardiac conduction (GO:0086091)	1/35	0.0903616	0.905924	0	0	10.582	25.4385	ANK2
lipid phosphorylation (GO:0046834)	1/35	0.0903616	0.907707	0	0	10.582	25.4385	EFR3A
positive regulation of RNA metabolic process (GO:0051254)	1/35	0.0903616	0.909497	0	0	10.582	25.4385	HRAS
receptor-mediated endocytosis (GO:0006898)	2/188	0.0915935	0.895405	0	0	3.94011	9.41842	LRP1;AP2S1
zymogen activation (GO:0031638)	1/36	0.0928219	0.898805	0	0	10.2881	24.4555	GRIN2A
plasma membrane organization (GO:0007009)	1/36	0.0928219	0.900514	0	0	10.2881	24.4555	ANK2
glutamate receptor signaling pathway (GO:0007215)	1/36	0.0928219	0.902229	0	0	10.2881	24.4555	GRIN2A
sodium ion transmembrane transport (GO:0035725)	1/36	0.0928219	0.903951	0	0	10.2881	24.4555	SCN1A
axonal transport (GO:0098930)	1/36	0.0928219	0.905679	0	0	10.2881	24.4555	SOD1
positive regulation of GTPase activity (GO:0043547)	2/192	0.0949059	0.917244	0	0	3.85802	9.08515	NTRK1;HRAS
response to steroid hormone (GO:0048545)	1/37	0.0952757	0.915616	0	0	10.01	23.5333	ATP1A3
negative regulation of Ras protein signal transduction (GO:0046580)	1/37	0.0952757	0.917343	0	0	10.01	23.5333	MET
regulation of dendrite development (GO:0050773)	1/37	0.0952757	0.919077	0	0	10.01	23.5333	CAMK2B
RNA processing (GO:0006396)	2/193	0.0957394	0.918342	0	0	3.83803	9.00451	SRSF11;PPP1R9B
retina homeostasis (GO:0001895)	1/38	0.097723	0.932113	0	0	9.74659	22.6668	SOD1
membrane depolarization during action potential (GO:0086010)	1/38	0.097723	0.933858	0	0	9.74659	22.6668	SCN1A
potassium ion import (GO:0010107)	1/38	0.097723	0.93561	0	0	9.74659	22.6668	ATP1A3
negative regulation of programmed cell death (GO:0043069)	3/408	0.0977713	0.930834	0	0	2.72331	6.33204	NTRK1;CD38;MET
positive regulation of peptide hormone secretion (GO:0090277)	1/39	0.100164	0.937864	0	0	9.49668	21.8514	DRD2
cellular response to amino acid starvation (GO:0034198)	1/39	0.100164	0.939588	0	0	9.49668	21.8514	MAPK3
ERBB2 signaling pathway (GO:0038128)	1/39	0.100164	0.941318	0	0	9.49668	21.8514	HRAS
clathrin-dependent endocytosis (GO:0072583)	1/39	0.100164	0.943055	0	0	9.49668	21.8514	AP2S1
regulation of proteasomal protein catabolic process (GO:0061136)	1/39	0.100164	0.944798	0	0	9.49668	21.8514	GPX1
inositol lipid-mediated signaling (GO:0048017)	1/39	0.100164	0.946548	0	0	9.49668	21.8514	NTRK1
regulation of alternative mRNA splicing, via spliceosome (GO:0000381)	1/39	0.100164	0.948304	0	0	9.49668	21.8514	CELF4
regulation of extrinsic apoptotic signaling pathway via death domain receptors (GO:1902041)	1/39	0.100164	0.950066	0	0	9.49668	21.8514	GPX1
positive regulation of reactive oxygen species metabolic process (GO:2000379)	1/39	0.100164	0.951836	0	0	9.49668	21.8514	SOD1
regulation of cell growth (GO:0001558)	2/201	0.102483	0.957825	0	0	3.68528	8.39526	APBB1;PPP1R9B
JAK-STAT cascade (GO:0007259)	1/40	0.102598	0.948474	0	0	9.25926	21.0827	MAPK3
positive regulation of Ras protein signal transduction (GO:0046579)	1/40	0.102598	0.950196	0	0	9.25926	21.0827	NTRK1
regulation of cholesterol biosynthetic process (GO:0045540)	1/40	0.102598	0.951923	0	0	9.25926	21.0827	SOD1
cognition (GO:0050890)	1/40	0.102598	0.953657	0	0	9.25926	21.0827	C12ORF57
neuron migration (GO:0001764)	1/40	0.102598	0.955398	0	0	9.25926	21.0827	DNER
regulation of release of cytochrome c from mitochondria (GO:0090199)	1/40	0.102598	0.957144	0	0	9.25926	21.0827	GPX1
positive regulation of multicellular organismal process (GO:0051240)	2/202	0.103336	0.953565	0	0	3.66703	8.32334	LRP1;SOD1
regulation of substrate adhesion-dependent cell spreading (GO:1900024)	1/41	0.105026	0.962203	0	0	9.03342	20.3573	ACTN4
positive regulation of cell division (GO:0051781)	1/41	0.105026	0.963934	0	0	9.03342	20.3573	DRD2
regulation of stress-activated MAPK cascade (GO:0032872)	1/41	0.105026	0.965671	0	0	9.03342	20.3573	MAPK3
spliceosomal complex assembly (GO:0000245)	1/41	0.105026	0.967414	0	0	9.03342	20.3573	SF3B1
negative regulation of protein secretion (GO:0050709)	1/42	0.107447	0.979113	0	0	8.81834	19.6716	DRD2
regulation of telomerase activity (GO:0051972)	1/42	0.107447	0.980865	0	0	8.81834	19.6716	MAPK3
regulation of ion transmembrane transporter activity (GO:0032412)	1/42	0.107447	0.982623	0	0	8.81834	19.6716	ANK2
regulation of multicellular organismal development (GO:2000026)	1/43	0.109862	0.990507	0	0	8.61326	19.0226	GPX1
branching morphogenesis of an epithelial tube (GO:0048754)	1/43	0.109862	0.99226	0	0	8.61326	19.0226	MET
membrane depolarization (GO:0051899)	1/43	0.109862	0.99402	0	0	8.61326	19.0226	SCN1A
negative regulation of protein metabolic process (GO:0051248)	1/43	0.109862	0.995785	0	0	8.61326	19.0226	APBB1
mitotic metaphase plate congression (GO:0007080)	1/43	0.109862	0.997557	0	0	8.61326	19.0226	CHMP1A
regulation of B cell proliferation (GO:0030888)	1/43	0.109862	0.999335	0	0	8.61326	19.0226	CD38
positive regulation of transport (GO:0051050)	1/44	0.112271	1	0	0	8.41751	18.4078	LRP1
metaphase plate congression (GO:0051310)	1/44	0.112271	1	0	0	8.41751	18.4078	CHMP1A
myeloid cell differentiation (GO:0030099)	1/44	0.112271	1	0	0	8.41751	18.4078	TET2
nicotinamide nucleotide metabolic process (GO:0046496)	1/45	0.114673	1	0	0	8.23045	17.8245	CD38
metal ion homeostasis (GO:0055065)	1/45	0.114673	1	0	0	8.23045	17.8245	CADPS2
nucleus organization (GO:0006997)	1/45	0.114673	1	0	0	8.23045	17.8245	CHMP1A
cellular response to ionizing radiation (GO:0071479)	1/46	0.117069	1	0	0	8.05153	17.2705	HRAS
interleukin-12-mediated signaling pathway (GO:0035722)	1/46	0.117069	1	0	0	8.05153	17.2705	SOD1
protein methylation (GO:0006479)	1/46	0.117069	1	0	0	8.05153	17.2705	ETFB
regulation of cellular component movement (GO:0051270)	1/46	0.117069	1	0	0	8.05153	17.2705	ACTN4
icosanoid metabolic process (GO:0006690)	1/46	0.117069	1	0	0	8.05153	17.2705	GPX1
negative regulation of autophagy (GO:0010507)	1/46	0.117069	1	0	0	8.05153	17.2705	MET
cellular response to interleukin-12 (GO:0071349)	1/46	0.117069	1	0	0	8.05153	17.2705	SOD1
negative regulation of nucleic acid-templated transcription (GO:1903507)	3/444	0.11804	1	0	0	2.5025	5.34718	TSHZ3;CHMP1A;CD38
positive regulation of gene expression, epigenetic (GO:0045815)	1/47	0.119458	1	0	0	7.88022	16.7438	SF3B1
histone H4 acetylation (GO:0043967)	1/47	0.119458	1	0	0	7.88022	16.7438	APBB1
positive regulation of cell migration (GO:0030335)	2/221	0.119887	1	0	0	3.35177	7.10978	ACTN4;HRAS
positive regulation of chemotaxis (GO:0050921)	1/48	0.121841	1	0	0	7.71605	16.2426	MET
amino acid transport (GO:0006865)	1/48	0.121841	1	0	0	7.71605	16.2426	SLC38A10
cellular response to mechanical stimulus (GO:0071260)	1/48	0.121841	1	0	0	7.71605	16.2426	MAPK3
regulation of release of sequestered calcium ion into cytosol (GO:0051279)	1/49	0.124218	1	0	0	7.55858	15.7651	ANK2
regulation of ion transport (GO:0043269)	1/50	0.126588	1	0	0	7.40741	15.3097	DRD2
receptor internalization (GO:0031623)	1/50	0.126588	1	0	0	7.40741	15.3097	LRP1
fatty acid beta-oxidation (GO:0006635)	1/50	0.126588	1	0	0	7.40741	15.3097	ETFB
peptidyl-tyrosine modification (GO:0018212)	1/51	0.128952	1	0	0	7.26216	14.8752	NTRK1
regulation of telomere maintenance via telomerase (GO:0032210)	1/51	0.128952	1	0	0	7.26216	14.8752	MAPK3
response to organonitrogen compound (GO:0010243)	1/51	0.128952	1	0	0	7.26216	14.8752	DRD2
regulation of signal transduction (GO:0009966)	2/233	0.130662	1	0	0	3.17914	6.47001	NTRK1;MET
RNA splicing, via transesterification reactions with bulged adenosine as nucleophile (GO:0000377)	2/236	0.133391	1	0	0	3.13873	6.32289	SF3B1;SRSF11
protein phosphorylation (GO:0006468)	3/470	0.133584	1	0	0	2.36407	4.75892	CAMK2B;NTRK1;MAPK3
regulation of calcium ion-dependent exocytosis (GO:0017158)	1/53	0.133662	1	0	0	6.98812	14.0632	SYN1
sensory perception (GO:0007600)	1/54	0.136007	1	0	0	6.85871	13.6835	ADORA2A
action potential (GO:0001508)	1/54	0.136007	1	0	0	6.85871	13.6835	SCN1A
positive regulation of cysteine-type endopeptidase activity (GO:2001056)	1/55	0.138346	1	0	0	6.73401	13.3198	GRIN2A
positive regulation of DNA biosynthetic process (GO:2000573)	1/55	0.138346	1	0	0	6.73401	13.3198	MAPK3
regulation of cell proliferation (GO:0042127)	4/740	0.138804	1	0	0	2.002	3.95334	NTRK1;DRD2;HRAS;PPP1R9B
regulation of secretion by cell (GO:1903530)	1/56	0.140679	1	0	0	6.61376	12.9714	SYN1
phosphatidylinositol-mediated signaling (GO:0048015)	1/56	0.140679	1	0	0	6.61376	12.9714	NTRK1
negative regulation of cellular catabolic process (GO:0031330)	1/56	0.140679	1	0	0	6.61376	12.9714	MET
cellular iron ion homeostasis (GO:0006879)	1/56	0.140679	1	0	0	6.61376	12.9714	SOD1
transcription from RNA polymerase II promoter (GO:0006366)	3/485	0.142867	1	0	0	2.29095	4.45783	INTS1;NR2F1;SRSF11
regulation of Rho protein signal transduction (GO:0035023)	1/57	0.143006	1	0	0	6.49773	12.6372	MET
cellular respiration (GO:0045333)	1/57	0.143006	1	0	0	6.49773	12.6372	ETFB
epidermal growth factor receptor signaling pathway (GO:0007173)	1/57	0.143006	1	0	0	6.49773	12.6372	HRAS
receptor metabolic process (GO:0043112)	1/58	0.145326	1	0	0	6.3857	12.3166	LRP1
response to light stimulus (GO:0009416)	1/58	0.145326	1	0	0	6.3857	12.3166	DRD2
sodium ion transport (GO:0006814)	1/58	0.145326	1	0	0	6.3857	12.3166	SCN1A
regulation of gene expression (GO:0010468)	5/1037	0.146975	1	0	0	1.78578	3.42422	GPX1;ANK2;APBB1;HRAS;MAPK3
regulation of protein metabolic process (GO:0051246)	1/59	0.147641	1	0	0	6.27746	12.0086	LRP1
regulation of stress fiber assembly (GO:0051492)	1/60	0.149949	1	0	0	6.17284	11.7127	MET
regulation of mRNA splicing, via spliceosome (GO:0048024)	1/60	0.149949	1	0	0	6.17284	11.7127	CELF4
positive regulation of protein binding (GO:0032092)	1/60	0.149949	1	0	0	6.17284	11.7127	LRP1
regulation of DNA replication (GO:0006275)	1/61	0.152251	1	0	0	6.07165	11.4282	HRAS
RNA 3'-end processing (GO:0031123)	1/61	0.152251	1	0	0	6.07165	11.4282	SRSF11
stress-activated MAPK cascade (GO:0051403)	1/62	0.154547	1	0	0	5.97372	11.1545	MAPK3
positive regulation of catabolic process (GO:0009896)	1/62	0.154547	1	0	0	5.97372	11.1545	LRP1
diterpenoid metabolic process (GO:0016101)	1/62	0.154547	1	0	0	5.97372	11.1545	LRP1
second-messenger-mediated signaling (GO:0019932)	1/62	0.154547	1	0	0	5.97372	11.1545	PPP1R9B
regulation of actin filament-based process (GO:0032970)	1/62	0.154547	1	0	0	5.97372	11.1545	LRP1
cellular protein catabolic process (GO:0044257)	1/62	0.154547	1	0	0	5.97372	11.1545	AP2S1
iron ion homeostasis (GO:0055072)	1/63	0.156837	1	0	0	5.87889	10.891	SOD1
positive regulation of protein polymerization (GO:0032273)	1/64	0.15912	1	0	0	5.78704	10.6371	MET
positive regulation of endocytosis (GO:0045807)	1/64	0.15912	1	0	0	5.78704	10.6371	LRP1
negative regulation of cellular macromolecule biosynthetic process (GO:2000113)	3/512	0.160104	1	0	0	2.17014	3.97554	TSHZ3;CHMP1A;CD38
cellular response to reactive oxygen species (GO:0034614)	1/65	0.161398	1	0	0	5.69801	10.3925	MAPK3
negative regulation of apoptotic signaling pathway (GO:2001234)	1/65	0.161398	1	0	0	5.69801	10.3925	GPX1
regulation of programmed cell death (GO:0043067)	2/268	0.163246	1	0	0	2.76396	5.00967	NTRK1;ACTN4
positive regulation of cellular process (GO:0048522)	3/519	0.164676	1	0	0	2.14087	3.86164	LRP1;ACTN4;HRAS
peptidyl-threonine phosphorylation (GO:0018107)	1/68	0.168195	1	0	0	5.44662	9.70933	CAMK2B
negative regulation of cysteine-type endopeptidase activity involved in apoptotic process (GO:0043154)	1/68	0.168195	1	0	0	5.44662	9.70933	GPX1
negative regulation of phosphatase activity (GO:0010923)	1/68	0.168195	1	0	0	5.44662	9.70933	PPP1R1B
termination of RNA polymerase II transcription (GO:0006369)	1/68	0.168195	1	0	0	5.44662	9.70933	SRSF11
response to organic cyclic compound (GO:0014070)	1/69	0.170448	1	0	0	5.36769	9.49717	DRD2
positive regulation of neurogenesis (GO:0050769)	1/69	0.170448	1	0	0	5.36769	9.49717	DRD2
positive regulation of plasma membrane bounded cell projection assembly (GO:0120034)	1/69	0.170448	1	0	0	5.36769	9.49717	HRAS
positive regulation of macromolecule metabolic process (GO:0010604)	2/276	0.170893	1	0	0	2.68384	4.74159	ANK2;MAPK3
positive regulation of endothelial cell migration (GO:0010595)	1/70	0.172696	1	0	0	5.29101	9.29219	MET
stress-activated protein kinase signaling cascade (GO:0031098)	1/70	0.172696	1	0	0	5.29101	9.29219	MAPK3
snRNA transcription (GO:0009301)	1/70	0.172696	1	0	0	5.29101	9.29219	INTS1
interferon-gamma-mediated signaling pathway (GO:0060333)	1/70	0.172696	1	0	0	5.29101	9.29219	CAMK2B
snRNA transcription from RNA polymerase II promoter (GO:0042795)	1/70	0.172696	1	0	0	5.29101	9.29219	INTS1
regulation of cation channel activity (GO:2001257)	1/71	0.174937	1	0	0	5.21648	9.09404	ANK2
regulation of cell communication (GO:0010646)	1/71	0.174937	1	0	0	5.21648	9.09404	ANK2
organelle membrane fusion (GO:0090174)	1/71	0.174937	1	0	0	5.21648	9.09404	SNAP25
positive regulation of lymphocyte proliferation (GO:0050671)	1/71	0.174937	1	0	0	5.21648	9.09404	CD38
histone acetylation (GO:0016573)	1/71	0.174937	1	0	0	5.21648	9.09404	APBB1
negative regulation of cysteine-type endopeptidase activity (GO:2000117)	1/72	0.177173	1	0	0	5.14403	8.90241	GPX1
negative regulation of cell cycle (GO:0045786)	1/72	0.177173	1	0	0	5.14403	8.90241	CHMP1A
mRNA processing (GO:0006397)	2/283	0.177635	1	0	0	2.61746	4.52303	SF3B1;SRSF11
regulation of peptide hormone secretion (GO:0090276)	1/73	0.179403	1	0	0	5.07357	8.71701	SNAP25
positive regulation of cytokine secretion (GO:0050715)	1/73	0.179403	1	0	0	5.07357	8.71701	DRD2
mRNA 3'-end processing (GO:0031124)	1/74	0.181626	1	0	0	5.00501	8.53756	SRSF11
regulation of G-protein coupled receptor protein signaling pathway (GO:0008277)	1/74	0.181626	1	0	0	5.00501	8.53756	PPP1R9B
retinoid metabolic process (GO:0001523)	1/75	0.183844	1	0	0	4.93827	8.36379	LRP1
regulation of actin cytoskeleton organization (GO:0032956)	1/75	0.183844	1	0	0	4.93827	8.36379	LRP1
negative regulation of extrinsic apoptotic signaling pathway (GO:2001237)	1/76	0.186056	1	0	0	4.87329	8.19545	GPX1
positive regulation of JNK cascade (GO:0046330)	1/76	0.186056	1	0	0	4.87329	8.19545	HRAS
hemopoiesis (GO:0030097)	1/76	0.186056	1	0	0	4.87329	8.19545	TET2
positive regulation of cytoskeleton organization (GO:0051495)	1/77	0.188262	1	0	0	4.81	8.03232	HRAS
regulation of cytokinesis (GO:0032465)	1/77	0.188262	1	0	0	4.81	8.03232	DRD2
fibroblast growth factor receptor signaling pathway (GO:0008543)	1/78	0.190462	1	0	0	4.74834	7.87418	MAPK3
sensory perception of mechanical stimulus (GO:0050954)	1/78	0.190462	1	0	0	4.74834	7.87418	SOD1
RNA transport (GO:0050658)	1/80	0.194845	1	0	0	4.62963	7.57199	SRSF11
positive regulation of stress-activated MAPK cascade (GO:0032874)	1/80	0.194845	1	0	0	4.62963	7.57199	HRAS
regulation of phosphatidylinositol 3-kinase signaling (GO:0014066)	1/80	0.194845	1	0	0	4.62963	7.57199	MAPK3
regulation of hydrolase activity (GO:0051336)	1/80	0.194845	1	0	0	4.62963	7.57199	SOD1
cellular response to hormone stimulus (GO:0032870)	1/80	0.194845	1	0	0	4.62963	7.57199	ATP1A3
ERBB signaling pathway (GO:0038127)	1/80	0.194845	1	0	0	4.62963	7.57199	HRAS
positive regulation of transcription from RNA polymerase II promoter (GO:0045944)	4/848	0.195142	1	0	0	1.74703	2.85469	TET2;HRAS;MET;MAPK3
negative regulation of transcription from RNA polymerase II promoter (GO:0000122)	3/565	0.195651	1	0	0	1.96657	3.2083	MBD3;NR2F1;APBB1
sensory perception of sound (GO:0007605)	1/81	0.197028	1	0	0	4.57247	7.42758	SOD1
BMP signaling pathway (GO:0030509)	1/81	0.197028	1	0	0	4.57247	7.42758	MAPK3
positive regulation of protein catabolic process (GO:0045732)	1/81	0.197028	1	0	0	4.57247	7.42758	LRP1
mitotic sister chromatid segregation (GO:0000070)	1/82	0.199205	1	0	0	4.51671	7.28737	CHMP1A
positive regulation of DNA metabolic process (GO:0051054)	1/82	0.199205	1	0	0	4.51671	7.28737	HRAS
positive regulation of apoptotic process (GO:0043065)	2/307	0.20105	1	0	0	2.41284	3.87068	APBB1;SOD1
calcium ion transmembrane transport (GO:0070588)	1/86	0.207854	1	0	0	4.30663	6.76537	GRIN2A
DNA metabolic process (GO:0006259)	2/314	0.207951	1	0	0	2.35905	3.70477	MBD3;MCM6
cellular response to BMP stimulus (GO:0071773)	1/87	0.210002	1	0	0	4.25713	6.64384	MAPK3
positive regulation of cellular component biogenesis (GO:0044089)	1/87	0.210002	1	0	0	4.25713	6.64384	NRXN1
regulation of MAP kinase activity (GO:0043405)	1/87	0.210002	1	0	0	4.25713	6.64384	HRAS
Wnt signaling pathway, planar cell polarity pathway (GO:0060071)	1/88	0.212144	1	0	0	4.20875	6.52562	AP2S1
regulation of establishment of planar polarity (GO:0090175)	1/89	0.214281	1	0	0	4.16146	6.4106	AP2S1
peptidyl-threonine modification (GO:0018210)	1/89	0.214281	1	0	0	4.16146	6.4106	CAMK2B
regulation of Ras protein signal transduction (GO:0046578)	1/90	0.216412	1	0	0	4.11523	6.29865	NTRK1
regulation of JNK cascade (GO:0046328)	1/90	0.216412	1	0	0	4.11523	6.29865	HRAS
regulation of protein catabolic process (GO:0042176)	1/91	0.218537	1	0	0	4.07	6.18966	LRP1
phospholipase C-activating G-protein coupled receptor signaling pathway (GO:0007200)	1/91	0.218537	1	0	0	4.07	6.18966	DRD2
nuclear export (GO:0051168)	1/92	0.220657	1	0	0	4.02576	6.08352	SRSF11
cell cycle G1/S phase transition (GO:0044843)	1/92	0.220657	1	0	0	4.02576	6.08352	MCM6
cellular transition metal ion homeostasis (GO:0046916)	1/93	0.222771	1	0	0	3.98248	5.98014	SOD1
regulation of cysteine-type endopeptidase activity involved in apoptotic process (GO:0043281)	1/93	0.222771	1	0	0	3.98248	5.98014	GPX1
cellular response to DNA damage stimulus (GO:0006974)	2/329	0.222825	1	0	0	2.25149	3.38032	APBB1;MAPK3
cellular response to fibroblast growth factor stimulus (GO:0044344)	1/94	0.224879	1	0	0	3.94011	5.8794	MAPK3
vesicle fusion (GO:0006906)	1/94	0.224879	1	0	0	3.94011	5.8794	SNAP25
skin development (GO:0043588)	1/94	0.224879	1	0	0	3.94011	5.8794	MET
respiratory electron transport chain (GO:0022904)	1/94	0.224879	1	0	0	3.94011	5.8794	ETFB
interleukin-1-mediated signaling pathway (GO:0070498)	1/95	0.226982	1	0	0	3.89864	5.78123	MAPK3
regulation of cell death (GO:0010941)	1/96	0.229079	1	0	0	3.85802	5.68553	LRP1
positive regulation of protein metabolic process (GO:0051247)	1/96	0.229079	1	0	0	3.85802	5.68553	LRP1
mRNA metabolic process (GO:0016071)	1/97	0.23117	1	0	0	3.81825	5.59221	SRSF11
antigen processing and presentation of exogenous peptide antigen via MHC class II (GO:0019886)	1/97	0.23117	1	0	0	3.81825	5.59221	AP2S1
cellular response to organonitrogen compound (GO:0071417)	1/97	0.23117	1	0	0	3.81825	5.59221	GABRB2
negative regulation of cell motility (GO:2000146)	1/97	0.23117	1	0	0	3.81825	5.59221	DRD2
antigen processing and presentation of exogenous peptide antigen (GO:0002478)	1/97	0.23117	1	0	0	3.81825	5.59221	AP2S1
protein localization to organelle (GO:0033365)	1/97	0.23117	1	0	0	3.81825	5.59221	ANK2
phosphatidylinositol biosynthetic process (GO:0006661)	1/98	0.233256	1	0	0	3.77929	5.5012	SBF1
antigen processing and presentation of peptide antigen via MHC class II (GO:0002495)	1/98	0.233256	1	0	0	3.77929	5.5012	AP2S1
response to UV (GO:0009411)	1/98	0.233256	1	0	0	3.77929	5.5012	GPX1
small GTPase mediated signal transduction (GO:0007264)	1/99	0.235337	1	0	0	3.74111	5.41241	HRAS
cellular response to metal ion (GO:0071248)	1/100	0.237412	1	0	0	3.7037	5.32578	MAPK3
mRNA-containing ribonucleoprotein complex export from nucleus (GO:0071427)	1/100	0.237412	1	0	0	3.7037	5.32578	SRSF11
cellular divalent inorganic cation homeostasis (GO:0072503)	1/101	0.239481	1	0	0	3.66703	5.24122	ANK2
metal ion transport (GO:0030001)	1/101	0.239481	1	0	0	3.66703	5.24122	SCN1A
cytokine-mediated signaling pathway (GO:0019221)	3/633	0.24379	1	0	0	1.75531	2.47753	CAMK2B;MAPK3;SOD1
B cell receptor signaling pathway (GO:0050853)	1/104	0.245656	1	0	0	3.56125	4.99937	CD38
monovalent inorganic cation transport (GO:0015672)	1/104	0.245656	1	0	0	3.56125	4.99937	SCN1A
mRNA transport (GO:0051028)	1/104	0.245656	1	0	0	3.56125	4.99937	SRSF11
G1/S transition of mitotic cell cycle (GO:0000082)	1/105	0.247703	1	0	0	3.52734	4.92248	MCM6
mRNA export from nucleus (GO:0006406)	1/105	0.247703	1	0	0	3.52734	4.92248	SRSF11
DNA-templated transcription, termination (GO:0006353)	1/106	0.249745	1	0	0	3.49406	4.84736	SRSF11
fatty acid metabolic process (GO:0006631)	1/106	0.249745	1	0	0	3.49406	4.84736	GPX1
positive regulation of epithelial cell proliferation (GO:0050679)	1/107	0.251782	1	0	0	3.46141	4.77395	HRAS
negative regulation of response to external stimulus (GO:0032102)	1/107	0.251782	1	0	0	3.46141	4.77395	DRD2
cellular response to starvation (GO:0009267)	1/107	0.251782	1	0	0	3.46141	4.77395	MAPK3
positive regulation of cell cycle process (GO:0090068)	1/107	0.251782	1	0	0	3.46141	4.77395	DRD2
regulation of cytokine production (GO:0001817)	1/108	0.253813	1	0	0	3.42936	4.70219	SOD1
negative regulation of hydrolase activity (GO:0051346)	1/108	0.253813	1	0	0	3.42936	4.70219	HRAS
regulation of Wnt signaling pathway (GO:0030111)	1/109	0.255838	1	0	0	3.39789	4.63204	LRP1
cellular response to peptide hormone stimulus (GO:0071375)	1/110	0.257859	1	0	0	3.367	4.56345	ADCY5
regulation of protein binding (GO:0043393)	1/111	0.259873	1	0	0	3.33667	4.49636	LRP1
regulation of organelle organization (GO:0033043)	1/113	0.263887	1	0	0	3.27761	4.36655	MAPK3
protein O-linked glycosylation (GO:0006493)	1/115	0.267879	1	0	0	3.22061	4.24225	TET2
cellular response to interferon-gamma (GO:0071346)	1/116	0.269868	1	0	0	3.19285	4.18207	CAMK2B
chromatin remodeling (GO:0006338)	1/116	0.269868	1	0	0	3.19285	4.18207	MBD3
calcium ion transport (GO:0006816)	1/118	0.273828	1	0	0	3.13873	4.06546	ANK2
positive regulation of protein serine/threonine kinase activity (GO:0071902)	1/118	0.273828	1	0	0	3.13873	4.06546	HRAS
plasma membrane bounded cell projection organization (GO:0120036)	1/118	0.273828	1	0	0	3.13873	4.06546	PPP1R9B
RNA export from nucleus (GO:0006405)	1/119	0.2758	1	0	0	3.11236	4.00896	SRSF11
brain development (GO:0007420)	1/119	0.2758	1	0	0	3.11236	4.00896	GRIN2A
positive regulation of B cell activation (GO:0050871)	1/119	0.2758	1	0	0	3.11236	4.00896	CD38
actin filament organization (GO:0007015)	1/120	0.277767	1	0	0	3.08642	3.95362	PPP1R9B
DNA replication (GO:0006260)	1/120	0.277767	1	0	0	3.08642	3.95362	MCM6
stimulatory C-type lectin receptor signaling pathway (GO:0002223)	1/121	0.279729	1	0	0	3.06091	3.8994	HRAS
cellular calcium ion homeostasis (GO:0006874)	1/123	0.283637	1	0	0	3.01114	3.79422	ANK2
cellular protein modification process (GO:0006464)	4/1001	0.284637	1	0	0	1.48	1.85968	CAMK2B;NTRK1;SBF1;MAPK3
innate immune response activating cell surface receptor signaling pathway (GO:0002220)	1/124	0.285583	1	0	0	2.98686	3.7432	HRAS
dephosphorylation (GO:0016311)	1/124	0.285583	1	0	0	2.98686	3.7432	SBF1
negative regulation of macromolecule metabolic process (GO:0010605)	1/124	0.285583	1	0	0	2.98686	3.7432	HRAS
protein dephosphorylation (GO:0006470)	1/125	0.287524	1	0	0	2.96296	3.69318	SBF1
cytoskeleton organization (GO:0007010)	1/126	0.28946	1	0	0	2.93945	3.64415	DPYSL2
vesicle organization (GO:0016050)	1/127	0.291391	1	0	0	2.9163	3.59607	SNAP25
positive regulation of protein kinase B signaling (GO:0051897)	1/127	0.291391	1	0	0	2.9163	3.59607	MET
non-canonical Wnt signaling pathway (GO:0035567)	1/127	0.291391	1	0	0	2.9163	3.59607	AP2S1
positive regulation of NF-kappaB transcription factor activity (GO:0051092)	1/128	0.293316	1	0	0	2.89352	3.54891	NTRK1
generation of neurons (GO:0048699)	1/130	0.297152	1	0	0	2.849	3.4573	DNER
protein glycosylation (GO:0006486)	1/130	0.297152	1	0	0	2.849	3.4573	TET2
Fc-gamma receptor signaling pathway involved in phagocytosis (GO:0038096)	1/133	0.302867	1	0	0	2.78474	3.32627	MAPK3
positive regulation of cytosolic calcium ion concentration (GO:0007204)	1/133	0.302867	1	0	0	2.78474	3.32627	ADCY5
cellular response to organic substance (GO:0071310)	1/133	0.302867	1	0	0	2.78474	3.32627	MAPK3
Fc-gamma receptor signaling pathway (GO:0038094)	1/134	0.304761	1	0	0	2.76396	3.28421	MAPK3
Fc receptor mediated stimulatory signaling pathway (GO:0002431)	1/135	0.306651	1	0	0	2.74348	3.24292	MAPK3
mitochondrial transport (GO:0006839)	1/135	0.306651	1	0	0	2.74348	3.24292	SLC25A27
regulation of signal transduction by p53 class mediator (GO:1901796)	1/138	0.31229	1	0	0	2.68384	3.12351	MBD3
cellular response to growth factor stimulus (GO:0071363)	1/139	0.31416	1	0	0	2.66454	3.08514	NTRK1
regulation of primary metabolic process (GO:0080090)	1/139	0.31416	1	0	0	2.66454	3.08514	LRP1
regulation of intracellular signal transduction (GO:1902531)	2/422	0.315959	1	0	0	1.75531	2.02237	MBD3;MAPK3
regulation of cellular component organization (GO:0051128)	1/140	0.316025	1	0	0	2.6455	3.04745	AP2S1
inorganic cation transmembrane transport (GO:0098662)	1/140	0.316025	1	0	0	2.6455	3.04745	SCN1A
positive regulation of macromolecule biosynthetic process (GO:0010557)	1/142	0.319739	1	0	0	2.60824	2.97405	HRAS
cellular protein complex assembly (GO:0043623)	1/144	0.323434	1	0	0	2.57202	2.90319	AP2S1
neuron development (GO:0048666)	1/144	0.323434	1	0	0	2.57202	2.90319	PPP1R9B
transmembrane receptor protein serine/threonine kinase signaling pathway (GO:0007178)	1/144	0.323434	1	0	0	2.57202	2.90319	MAPK3
peptidyl-serine phosphorylation (GO:0018105)	1/145	0.325274	1	0	0	2.55428	2.86868	CAMK2B
regulation of protein kinase activity (GO:0045859)	1/147	0.328939	1	0	0	2.51953	2.80142	SOD1
cellular response to interleukin-1 (GO:0071347)	1/150	0.334401	1	0	0	2.46914	2.70473	MAPK3
protein stabilization (GO:0050821)	1/152	0.338017	1	0	0	2.43665	2.64293	ANK2
spermatogenesis (GO:0007283)	1/153	0.339818	1	0	0	2.42072	2.61279	SOD1
male gamete generation (GO:0048232)	1/154	0.341614	1	0	0	2.405	2.58315	SOD1
ribonucleoprotein complex assembly (GO:0022618)	1/156	0.345192	1	0	0	2.37417	2.52529	SF3B1
positive regulation of cellular biosynthetic process (GO:0031328)	1/159	0.350524	1	0	0	2.32937	2.44194	HRAS
transcription initiation from RNA polymerase II promoter (GO:0006367)	1/160	0.352291	1	0	0	2.31481	2.41504	NR2F1
negative regulation of intracellular signal transduction (GO:1902532)	1/161	0.354054	1	0	0	2.30044	2.38855	DRD2
glycerophospholipid biosynthetic process (GO:0046474)	1/164	0.359315	1	0	0	2.25836	2.31155	SBF1
neuron projection development (GO:0031175)	1/167	0.364533	1	0	0	2.21779	2.23805	PPP1R9B
peptidyl-serine modification (GO:0018209)	1/170	0.36971	1	0	0	2.17865	2.16783	CAMK2B
negative regulation of Wnt signaling pathway (GO:0030178)	1/174	0.376548	1	0	0	2.12857	2.07899	LRP1
ER to Golgi vesicle-mediated transport (GO:0006888)	1/180	0.386669	1	0	0	2.05761	1.95512	ANK2
phosphate-containing compound metabolic process (GO:0006796)	1/183	0.391669	1	0	0	2.02388	1.89706	MAPK3
regulation of mitotic cell cycle phase transition (GO:1901990)	1/184	0.393326	1	0	0	2.01288	1.87825	PPP1R9B
positive regulation of nucleic acid-templated transcription (GO:1903508)	2/502	0.394405	1	0	0	1.47558	1.37285	CD38;APBB1
regulation of autophagy (GO:0010506)	1/203	0.423992	1	0	0	1.82448	1.56548	MET
positive regulation of signal transduction (GO:0009967)	1/206	0.428693	1	0	0	1.79791	1.52286	NRXN1
positive regulation of sequence-specific DNA binding transcription factor activity (GO:0051091)	1/215	0.442571	1	0	0	1.72265	1.40423	NTRK1
regulation of cell cycle (GO:0051726)	1/215	0.442571	1	0	0	1.72265	1.40423	CHMP1A
viral process (GO:0016032)	1/220	0.450138	1	0	0	1.6835	1.34377	AP2S1
positive regulation of cytokine production (GO:0001819)	1/220	0.450138	1	0	0	1.6835	1.34377	SOD1
mitotic cell cycle phase transition (GO:0044772)	1/221	0.451639	1	0	0	1.67588	1.33211	MCM6
Ras protein signal transduction (GO:0007265)	1/223	0.454629	1	0	0	1.66085	1.30921	HRAS
ncRNA processing (GO:0034470)	1/227	0.460561	1	0	0	1.63159	1.26498	INTS1
apoptotic process (GO:0006915)	1/231	0.466431	1	0	0	1.60333	1.22278	ADORA2A
plasma membrane bounded cell projection assembly (GO:0120031)	1/241	0.480831	1	0	0	1.53681	1.12531	PPP1R9B
sensory perception of smell (GO:0007608)	1/241	0.480831	1	0	0	1.53681	1.12531	DRD2
regulation of nucleic acid-templated transcription (GO:1903506)	2/607	0.490941	1	0	0	1.22033	0.868181	ACTN4;APBB1
inflammatory response (GO:0006954)	1/252	0.49623	1	0	0	1.46972	1.02986	ADORA2A
antigen receptor-mediated signaling pathway (GO:0050851)	1/257	0.503081	1	0	0	1.44113	0.990062	CD38
protein deubiquitination (GO:0016579)	1/257	0.503081	1	0	0	1.44113	0.990062	DMWD
protein modification by small protein removal (GO:0070646)	1/261	0.508496	1	0	0	1.41904	0.959697	DMWD
Golgi vesicle transport (GO:0048193)	1/271	0.521781	1	0	0	1.36668	0.889037	ANK2
cellular response to oxygen-containing compound (GO:1901701)	1/274	0.525697	1	0	0	1.35172	0.869195	MAPK3
protein transport (GO:0015031)	1/326	0.588785	1	0	0	1.13611	0.601789	LRP1
cellular protein localization (GO:0034613)	1/327	0.589913	1	0	0	1.13263	0.59778	ANK2
sensory perception of chemical stimulus (GO:0007606)	1/327	0.589913	1	0	0	1.13263	0.59778	DRD2
cellular macromolecule biosynthetic process (GO:0034645)	1/367	0.632651	1	0	0	1.00918	0.462042	MCM6
regulation of transcription, DNA-templated (GO:0006355)	4/1598	0.635602	1	0	0	0.927085	0.420139	TSHZ3;CHMP1A;CD38;APBB1
organelle assembly (GO:0070925)	1/376	0.641646	1	0	0	0.985028	0.437074	CHMP1A
gene expression (GO:0010467)	1/411	0.67462	1	0	0	0.901144	0.354695	SRSF11
positive regulation of cell proliferation (GO:0008284)	1/424	0.686093	1	0	0	0.873515	0.32909	HRAS
neutrophil degranulation (GO:0043312)	1/479	0.730394	1	0	0	0.773216	0.242922	SNAP25
neutrophil activation involved in immune response (GO:0002283)	1/483	0.733365	1	0	0	0.766812	0.237797	SNAP25
cellular protein metabolic process (GO:0044267)	1/484	0.734103	1	0	0	0.765228	0.236537	ADORA2A
neutrophil mediated immunity (GO:0002446)	1/487	0.736304	1	0	0	0.760514	0.232803	SNAP25
regulation of cellular macromolecule biosynthetic process (GO:2000112)	1/631	0.823332	1	0	0	0.586958	0.114102	APBB1

## Sheet: D. DisGeNet (SFARI)
DisGeNet nrichment of human orthologs of DEGs associated with autistic spectrum disorders in SFARI
Term	Overlap	P-value	Adjusted P-value	Old P-value	Old Adjusted P-value	Odds Ratio	Combined Score	Genes
Autistic Disorder	19/677	5.43939e-15	5.34584e-11	0	0	10.3944	341.407	MBD3;SNAP25;GABRB2;CADPS2;GPX1;NRXN1;GABRA3;SYN1;SOD1;GRIN2A;ADORA2A;DPYSL2;DNER;CD38;DRD2;HRAS;MET;SCN1A;MAPK3
Abnormal behavior	14/372	7.69143e-13	3.77957e-09	0	0	13.9387	388.798	CX3CR1;SNAP25;CADPS2;GPX1;NRXN1;GABRA3;CELF4;SYN1;SOD1;GRIN2A;DPYSL2;DLGAP3;DRD2;SCN1A
Mental Depression	16/575	1.35983e-12	4.4548e-09	0	0	10.306	281.597	CX3CR1;NTRK1;SNAP25;GPX1;NRXN1;GABRA3;ATP1A3;SYN1;ADCY5;SOD1;GRIN2A;DPYSL2;PPP1R1B;DRD2;MET;MAPK3
Depressive disorder	17/741	5.08899e-12	1.25036e-08	0	0	8.49703	220.956	CX3CR1;NTRK1;SNAP25;GPX1;NRXN1;GABRA3;ATP1A3;SYN1;ADCY5;SOD1;GRIN2A;ADORA2A;DPYSL2;PPP1R1B;DRD2;MET;MAPK3
Autism Spectrum Disorders	15/572	1.80536e-11	3.54862e-08	0	0	9.71251	240.265	DPP10;CX3CR1;SNAP25;CADPS2;TSHZ3;NRXN1;CELF4;SYN1;GRIN2A;ADORA2A;CD38;DRD2;HRAS;MET;SCN1A
Movement Disorders	9/169	6.80526e-10	1.1147e-06	0	0	19.7239	416.334	ADORA2A;PPP1R1B;TET2;ATP1A3;DRD2;SF3B1;SCN1A;ADCY5;SOD1
Schizophrenia	22/1923	1.40285e-09	1.9696e-06	0	0	4.23721	86.3744	CAMK2B;CX3CR1;NTRK1;SNAP25;GABRB2;CADPS2;GPX1;LRP1;NRXN1;SYN1;PPP1R9B;SOD1;SLC25A27;GRIN2A;ADORA2A;DPYSL2;PPP1R1B;DLGAP3;DRD2;MET;SF3B1;MAPK3
Bipolar Disorder	15/837	3.5121e-09	4.31462e-06	0	0	6.63746	129.212	DPP10;NTRK1;SNAP25;GABRB2;NRXN1;GABRA3;ATP1A3;PPP1R9B;SOD1;GRIN2A;DPYSL2;PPP1R1B;DRD2;HRAS;MAPK3
Major Depressive Disorder	12/513	9.19012e-09	1.00356e-05	0	0	8.66363	160.322	SNAP25;GRIN2A;GPX1;LRP1;GABRA3;PPP1R1B;DRD2;MET;PPP1R9B;ADCY5;MAPK3;SOD1
Unipolar Depression	12/517	1.00186e-08	9.8463e-06	0	0	8.5966	158.339	DPP10;SNAP25;ADORA2A;LRP1;GABRA3;PPP1R1B;DRD2;MET;PPP1R9B;ADCY5;MAPK3;SOD1
Neuroblastoma	19/1698	4.09883e-08	3.66212e-05	0	0	4.14431	70.4946	CAMK2B;CX3CR1;NTRK1;SNAP25;GPX1;LRP1;ANK2;ACTN4;SYN1;SOD1;SLC25A27;DPYSL2;DNER;CD38;DRD2;HRAS;MET;SCN1A;MAPK3
Pervasive Development Disorder	7/129	5.42557e-08	4.44354e-05	0	0	20.0976	336.224	ADORA2A;NRXN1;CD38;DRD2;HRAS;MET;SYN1
Neurodevelopmental Disorders	8/208	8.25479e-08	6.24062e-05	0	0	14.245	232.335	CX3CR1;PHF2;GRIN2A;NRXN1;CD38;ATP1A3;ANK2;ADCY5
Headache	6/86	1.15924e-07	8.13788e-05	0	0	25.8398	412.67	CX3CR1;ADORA2A;TET2;DRD2;SCN1A;SOD1
Central neuroblastoma	18/1655	1.62534e-07	0.000106492	0	0	4.0282	62.9703	CAMK2B;CX3CR1;NTRK1;SNAP25;GPX1;LRP1;ANK2;ACTN4;SYN1;SOD1;SLC25A27;DPYSL2;DNER;CD38;DRD2;HRAS;SCN1A;MAPK3
Intellectual Disability	22/2503	1.77871e-07	0.000109257	0	0	3.25535	50.5954	CAMK2B;NTRK1;SNAP25;CADPS2;LRP1;INTS1;NRXN1;NR2F1;ATP1A3;ETFB;SYN1;ADCY5;SOD1;GRIN2A;CHMP1A;PPP1R1B;CD38;DRD2;HRAS;MET;AHDC1;SCN1A
Mood Disorders	9/336	2.61936e-07	0.00015143	0	0	9.92063	150.349	DPP10;GABRB2;GRIN2A;ADORA2A;GABRA3;PPP1R1B;DRD2;HRAS;PPP1R9B
Hyperactive behavior	12/709	3.13819e-07	0.000171345	0	0	6.26861	93.869	NTRK1;SNAP25;ADORA2A;NRXN1;AP2S1;DRD2;HRAS;MET;SCN1A;ADCY5;MAPK3;SOD1
Substance Withdrawal Syndrome	5/58	4.87829e-07	0.000252336	0	0	31.9285	464.026	GRIN2A;ADORA2A;PPP1R1B;DRD2;MAPK3
Migraine with Aura	5/68	1.08737e-06	0.000534332	0	0	27.2331	373.958	ADORA2A;LRP1;DRD2;SCN1A;SOD1
Epilepsy	14/1177	1.95162e-06	0.000913358	0	0	4.40542	57.9175	GABRB2;CADPS2;GPX1;NRXN1;GABRA3;CELF4;ATP1A3;ANK2;SYN1;SOD1;GRIN2A;DRD2;HRAS;SCN1A
Alzheimer's Disease	18/1982	2.31706e-06	0.00103509	0	0	3.36361	43.6435	CX3CR1;NTRK1;SNAP25;CADPS2;LRP1;SYN1;PPP1R9B;SOD1;SLC25A27;GRIN2A;ADORA2A;DPYSL2;PPP1R1B;CD38;APBB1;DRD2;MET;MAPK3
Mental disorders	8/329	2.65235e-06	0.00113336	0	0	9.00597	115.637	SNAP25;GABRB2;CADPS2;GRIN2A;DPYSL2;NRXN1;GABRA3;DRD2
Parkinson Disease	13/1064	3.66564e-06	0.00150108	0	0	4.5252	56.6397	CX3CR1;GPX1;LRP1;ATP1A3;PPP1R9B;ADCY5;SOD1;GRIN2A;ADORA2A;APBB1;DRD2;SCN1A;MAPK3
Gilles de la Tourette syndrome	5/97	6.3362e-06	0.00249089	0	0	19.0913	228.508	ADORA2A;NRXN1;DLGAP3;DRD2;MET
Neuralgia	5/100	7.35694e-06	0.00278092	0	0	18.5185	218.886	CX3CR1;NTRK1;DPYSL2;DRD2;SOD1
Genetic Diseases, Inborn	9/507	7.76421e-06	0.00282617	0	0	6.57462	77.3569	NTRK1;SNAP25;GRIN2A;DPYSL2;CHMP1A;ATP1A3;HRAS;SCN1A;ADCY5
Mental Retardation	13/1158	9.20005e-06	0.00322922	0	0	4.15787	48.2159	NTRK1;SNAP25;NRXN1;NR2F1;ATP1A3;SOD1;GRIN2A;CHMP1A;CD38;DRD2;HRAS;AHDC1;SCN1A
Myelodysplastic-Myeloproliferative Diseases	3/16	1.01626e-05	0.00344407	0	0	69.4444	798.389	NTRK1;TET2;SF3B1
Ataxia Telangiectasia	8/396	1.03284e-05	0.00338359	0	0	7.48223	85.9006	NTRK1;SNAP25;GPX1;DNER;CD38;DRD2;MAPK3;SOD1
Carcinoma, Spindle-Cell	6/188	1.13068e-05	0.00358462	0	0	11.8203	134.635	NTRK1;GDA;ACTN4;HRAS;MET;ADCY5
Migraine Disorders	7/290	1.23908e-05	0.00380553	0	0	8.93997	101.009	CX3CR1;ADORA2A;LRP1;GABRA3;DRD2;SCN1A;SOD1
Drug Withdrawal Symptoms	4/54	1.35776e-05	0.00404365	0	0	27.4348	307.465	GRIN2A;ADORA2A;DRD2;MAPK3
Dysmorphic features	4/55	1.46133e-05	0.00410341	0	0	26.936	299.894	NRXN1;GABRA3;CD38;HRAS
Common Migraine	4/55	1.46133e-05	0.0042241	0	0	26.936	299.894	LRP1;DRD2;SCN1A;SOD1
Alcoholic Intoxication, Chronic	8/424	1.69195e-05	0.00461903	0	0	6.98812	76.7788	GABRB2;GRIN2A;DPYSL2;NRXN1;PPP1R1B;DRD2;HRAS;ADCY5
Psychotic Disorders	7/317	2.19906e-05	0.00584118	0	0	8.17853	87.7138	NTRK1;SNAP25;GABRB2;GRIN2A;DPYSL2;PPP1R1B;DRD2
Bradykinesia	4/61	2.20937e-05	0.00571414	0	0	24.2866	260.357	GRIN2A;PPP1R1B;ATP1A3;DRD2
Diabetes Mellitus, Non-Insulin-Dependent	15/1672	2.41815e-05	0.00609374	0	0	3.3227	35.3201	CX3CR1;NTRK1;SNAP25;GPX1;LRP1;NRXN1;CELF4;ANK2;ADCY5;SOD1;DNER;CD38;MCM6;DRD2;HRAS
Seizures, Focal	5/129	2.53504e-05	0.0062286	0	0	14.3554	151.92	GRIN2A;ADORA2A;DRD2;SYN1;SCN1A
Severe depression	3/22	2.76286e-05	0.00662279	0	0	50.5051	530.134	TET2;DRD2;SF3B1
Status Epilepticus	6/221	2.82168e-05	0.00660273	0	0	10.0553	105.335	CX3CR1;GRIN2A;ADORA2A;DPYSL2;ATP1A3;SCN1A
Dystonia Disorders	5/135	3.15444e-05	0.00720974	0	0	13.7174	142.169	TET2;ATP1A3;DRD2;SF3B1;ADCY5
Cryptogenic Chronic Hepatitis	3/23	3.17123e-05	0.00692597	0	0	48.3092	500.425	GPX1;MET;SOD1
Involuntary Movements	3/23	3.17123e-05	0.00708338	0	0	48.3092	500.425	PPP1R1B;DRD2;MAPK3
Etat Marbre	3/24	3.61735e-05	0.00772854	0	0	46.2963	473.481	ADORA2A;DRD2;SCN1A
Cognition Disorders	6/237	4.17215e-05	0.00872424	0	0	9.37647	94.5569	CX3CR1;SNAP25;DRD2;MET;SCN1A;SOD1
Withdrawal Symptoms	4/73	4.499e-05	0.00921169	0	0	20.2943	203.127	GRIN2A;ADORA2A;DRD2;MAPK3
Schizophreniform Disorders	3/26	4.62908e-05	0.00928461	0	0	42.735	426.52	NTRK1;SNAP25;DRD2
Anemia	8/490	4.74039e-05	0.00931772	0	0	6.04686	60.2074	GPX1;INTS1;TET2;CD38;ACTN4;MET;SF3B1;SOD1
Acoustic Neuroma	4/74	4.7466e-05	0.00914697	0	0	20.02	199.309	GPX1;HRAS;MET;SOD1
Personality Disorders	3/27	5.19778e-05	0.0098238	0	0	41.1523	405.955	SNAP25;DRD2;SCN1A
Congenital chromosomal disease	8/497	5.23813e-05	0.00971328	0	0	5.9617	58.7642	SNAP25;INTS1;NRXN1;TET2;CD38;DRD2;HRAS;SF3B1
Philadelphia chromosome positive chronic myelogenous leukemia	3/28	5.8104e-05	0.0105749	0	0	39.6825	387.035	TET2;HRAS;SF3B1
Dyskinetic syndrome	4/78	5.83755e-05	0.0104312	0	0	18.9934	185.159	ADORA2A;PPP1R1B;DRD2;ADCY5
Nephroblastoma	7/370	5.87321e-05	0.0103075	0	0	7.00701	68.2659	PHF2;TET2;CD38;ACTN4;HRAS;MET;MAPK3
Plasma Cell Neoplasm	3/31	7.92692e-05	0.0136677	0	0	35.8423	338.447	CD38;HRAS;MET
Chronic Persistent Hepatitis	3/32	8.73027e-05	0.0147933	0	0	34.7222	324.518	GPX1;MET;SOD1
Myocardial Diseases, Secondary	4/89	9.77529e-05	0.0162833	0	0	16.6459	153.692	ADORA2A;LRP1;ADCY5;MAPK3
Monocytosis	3/34	0.000104925	0.0171867	0	0	32.6797	299.42	CX3CR1;TET2;SF3B1
Delusional disorder	2/6	0.000106584	0.0171723	0	0	123.457	1129.21	DPYSL2;DRD2
Drug Dependence	5/175	0.000108276	0.0171636	0	0	10.582	96.6225	CADPS2;GRIN2A;PPP1R1B;DRD2;MET
Cardiomyopathies, Primary	4/92	0.000111199	0.0173471	0	0	16.1031	146.605	ADORA2A;LRP1;ADCY5;MAPK3
Carcinomatosis	5/176	0.000111216	0.0170786	0	0	10.5219	95.7917	GDA;ACTN4;HRAS;MET;ADCY5
Therapy-related myelodysplastic syndrome	3/35	0.000114543	0.0173189	0	0	31.746	288.081	TET2;CD38;SF3B1
Familial medullary thyroid carcinoma	3/36	0.000124718	0.0185716	0	0	30.8642	277.452	NTRK1;HRAS;MAPK3
Epilepsy, Temporal Lobe	5/181	0.000126842	0.0186061	0	0	10.2312	91.8003	GABRB2;GRIN2A;DPYSL2;SCN1A;SOD1
Idiopathic pulmonary hypertension	4/96	0.000131154	0.0189556	0	0	15.4321	137.95	NTRK1;ADORA2A;MAPK3;SOD1
Ballismus	2/7	0.00014896	0.0206194	0	0	105.82	932.469	PPP1R1B;DRD2
Asterixis	2/7	0.00014896	0.0209139	0	0	105.82	932.469	PPP1R1B;DRD2
Hemiballismus	2/7	0.00014896	0.021217	0	0	105.82	932.469	PPP1R1B;DRD2
Lymphoma	12/1307	0.000151978	0.0207451	0	0	3.40049	29.8964	CX3CR1;NTRK1;SNAP25;GPX1;DNER;TET2;CD38;MCM6;HRAS;MET;SF3B1;MAPK3
Transient Ischemic Attack	5/191	0.000163105	0.0219589	0	0	9.69556	84.5561	CX3CR1;MBD3;NRXN1;ANK2;SOD1
Depression, Neurotic	3/40	0.000171266	0.022746	0	0	27.7778	240.897	SNAP25;ADORA2A;SOD1
Epileptic Seizures	4/103	0.000172137	0.0225569	0	0	14.3833	124.663	ADORA2A;GABRA3;DRD2;SCN1A
Melancholia	3/42	0.000198244	0.0253032	0	0	26.455	225.556	SNAP25;ADORA2A;SOD1
Isochromosomes	3/42	0.000198244	0.0256361	0	0	26.455	225.556	TET2;CD38;SF3B1
Oral Dyskinesia	2/8	0.000198269	0.0246657	0	0	92.5926	789.434	PPP1R1B;DRD2
Myelodysplastic syndrome, no ICD-O subtype	2/8	0.000198269	0.0249819	0	0	92.5926	789.434	TET2;SF3B1
Depressive Syndrome	3/43	0.000212706	0.026131	0	0	25.8398	218.491	SNAP25;ADORA2A;SOD1
Anaplastic carcinoma	5/204	0.000221526	0.0268785	0	0	9.07771	76.3886	GDA;ACTN4;HRAS;MET;ADCY5
Myocardial Infarction	10/966	0.00022731	0.027244	0	0	3.83406	32.1647	CX3CR1;GPX1;LRP1;CELF4;TET2;ANK2;SBF1;MET;MAPK3;SOD1
Merkel cell carcinoma	4/112	0.000237512	0.0281238	0	0	13.2275	110.387	NTRK1;DNER;MCM6;HRAS
Anxiety	7/464	0.00023867	0.0279243	0	0	5.58748	46.602	ADORA2A;ATP1A3;DLGAP3;DRD2;SYN1;ADCY5;SOD1
Bronchogenic Carcinoma	3/45	0.000243644	0.028171	0	0	24.6914	205.427	GPX1;HRAS;SOD1
Seizures	11/1174	0.000252317	0.0288345	0	0	3.47025	28.7504	GRIN2A;ADORA2A;NRXN1;ATP1A3;APBB1;DRD2;HRAS;SYN1;SCN1A;MAPK3;SOD1
Hemiplegic migraine	2/9	0.000254477	0.0284204	0	0	82.3045	681.177	ATP1A3;SCN1A
Chromosome 12, 12p trisomy	2/9	0.000254477	0.0287471	0	0	82.3045	681.177	CD38;SF3B1
Huntington Disease	8/627	0.000260001	0.0287111	0	0	4.72562	39.0092	SNAP25;GRIN2A;ADORA2A;DPYSL2;PPP1R1B;DRD2;SYN1;SOD1
Familial (FPAH)	4/116	0.000271647	0.0296638	0	0	12.7714	104.866	TET2;MET;ADCY5;SOD1
Carcinoma	5/216	0.000288491	0.031157	0	0	8.57339	69.8804	GDA;ACTN4;HRAS;MET;ADCY5
Manic Disorder	3/48	0.000295281	0.0312045	0	0	23.1481	188.139	NTRK1;SNAP25;ATP1A3
Epilepsies, Partial	3/48	0.000295281	0.0315437	0	0	23.1481	188.139	GRIN2A;SYN1;SCN1A
Nonorganic psychosis	5/220	0.000313914	0.0328207	0	0	8.41751	67.8989	GABRB2;GRIN2A;DPYSL2;PPP1R1B;DRD2
Endogenous depression	3/49	0.000313939	0.0321395	0	0	22.6757	182.91	SNAP25;ADORA2A;SOD1
Antisocial behavior	3/49	0.000313939	0.0324778	0	0	22.6757	182.91	SNAP25;PPP1R1B;DRD2
Refractory anemia with excess blasts II	2/10	0.000317546	0.0321736	0	0	74.0741	596.658	TET2;SF3B1
Opiate Addiction	3/50	0.000333342	0.0330917	0	0	22.2222	177.919	GRIN2A;PPP1R1B;DRD2
Lymphedema	3/50	0.000333342	0.0334294	0	0	22.2222	177.919	TET2;MET;SF3B1
Nicotine Dependence	4/124	0.000350281	0.0344256	0	0	11.9474	95.063	NRXN1;PPP1R1B;APBB1;DRD2
Drug-induced tardive dyskinesia	3/51	0.000353501	0.0340609	0	0	21.7865	173.151	ADORA2A;PPP1R1B;DRD2
Tardive Dyskinesia	3/51	0.000353501	0.0343981	0	0	21.7865	173.151	ADORA2A;PPP1R1B;DRD2
Amyotrophic Lateral Sclerosis	8/660	0.000366888	0.0350075	0	0	4.48934	35.5127	CX3CR1;SNAP25;GRIN2A;GDA;NRXN1;MET;MAPK3;SOD1
Central visual impairment	3/52	0.00037443	0.0350466	0	0	21.3675	168.592	NR2F1;AHDC1;SCN1A
Hippocampal sclerosis	3/52	0.00037443	0.0353836	0	0	21.3675	168.592	GRIN2A;SCN1A;SOD1
Primary Hyperthyroidism	2/11	0.00038744	0.0359223	0	0	67.3401	529.02	GPX1;SOD1
Chronic myeloproliferative disorder	5/233	0.000408415	0.0375131	0	0	7.94786	62.019	NTRK1;GRIN2A;DNER;TET2;SF3B1
Impaired cognition	8/671	0.000409626	0.037276	0	0	4.41574	34.444	CX3CR1;SNAP25;LRP1;DRD2;HRAS;PPP1R9B;SCN1A;SOD1
Encephalopathies	5/234	0.000416484	0.0375524	0	0	7.9139	61.5991	GRIN2A;ADORA2A;GABRA3;ATP1A3;SCN1A
Small cell carcinoma of lung	8/673	0.000417817	0.03733	0	0	4.40262	34.2544	NTRK1;SNAP25;LRP1;PPP1R1B;ACTN4;HRAS;MET;MAPK3
Autistic behavior	3/54	0.000418643	0.0370669	0	0	20.5761	160.051	NRXN1;SYN1;SCN1A
Presenile dementia	6/362	0.000418805	0.0367501	0	0	6.13874	47.7477	LRP1;DPYSL2;TET2;CD38;SF3B1;SOD1
Undifferentiated carcinoma	5/237	0.000441416	0.0383914	0	0	7.81372	60.3651	GDA;ACTN4;HRAS;MET;ADCY5
Sleep Apnea, Obstructive	4/132	0.000444023	0.0382795	0	0	11.2233	86.6401	NTRK1;HRAS;MET;AHDC1
MYELODYSPLASTIC SYNDROME	8/683	0.000460803	0.0393806	0	0	4.33816	33.3281	INTS1;TET2;CD38;HRAS;MET;SF3B1;SRSF11;MAPK3
Abnormal involuntary movement	2/12	0.000464124	0.0380117	0	0	61.7284	473.788	ADORA2A;DRD2
Radiation Injuries, Experimental	2/12	0.000464124	0.0383312	0	0	61.7284	473.788	MAPK3;SOD1
Semantic-Pragmatic Disorder	2/12	0.000464124	0.038656	0	0	61.7284	473.788	GRIN2A;NRXN1
Auditory Processing Disorder, Central	2/12	0.000464124	0.0389864	0	0	61.7284	473.788	GRIN2A;NRXN1
Refractory anemia with excess blasts I	2/12	0.000464124	0.0393225	0	0	61.7284	473.788	TET2;SF3B1
Breast Carcinoma	25/4963	0.000483686	0.0392865	0	0	1.86566	14.2426	CAMK2B;CX3CR1;PHF2;LRP1;TSHZ3;PPP1R9B;DPYSL2;DNER;CD38;APBB1;DRD2;HRAS;SF3B1;MAPK3;NTRK1;GPX1;INTS1;GABRA3;TET2;NR2F1;ACTN4;SYN1;SOD1;PPP1R1B;MET
Nausea	3/58	0.000516836	0.0412964	0	0	19.1571	144.977	ETFB;DRD2;HRAS
Amnesia	3/58	0.000516836	0.0416349	0	0	19.1571	144.977	CX3CR1;CD38;SOD1
melanoma	16/2454	0.000541226	0.0428966	0	0	2.4148	18.1634	CAMK2B;NTRK1;LRP1;GABRA3;TET2;ACTN4;SYN1;GRIN2A;ADORA2A;DNER;SBF1;DRD2;HRAS;MET;SF3B1;MAPK3
SVEINSSON CHORIORETINAL ATROPHY	3/59	0.000543487	0.0427311	0	0	18.8324	141.573	TET2;SF3B1;MAPK3
Language Development Disorders	2/13	0.000547562	0.0423735	0	0	56.9801	427.922	GRIN2A;NRXN1
DISORGANIZATION, MOUSE, HOMOLOG OF	2/13	0.000547562	0.0427098	0	0	56.9801	427.922	SOD1;SCN1A
Brain Diseases	5/250	0.00056271	0.0432055	0	0	7.40741	55.4278	ADORA2A;NRXN1;ATP1A3;DRD2;SCN1A
Dystonia	5/251	0.00057298	0.0436531	0	0	7.3779	55.0735	TET2;ATP1A3;DRD2;SF3B1;ADCY5
Alzheimer Disease, Late Onset	5/253	0.000593943	0.0449021	0	0	7.31957	54.3751	SLC25A27;LRP1;DPYSL2;NRXN1;DRD2
Awakening Epilepsy	3/61	0.000599395	0.0442921	0	0	18.2149	135.147	GRIN2A;GPX1;SCN1A
Aura	3/61	0.000599395	0.0446277	0	0	18.2149	135.147	GRIN2A;GPX1;SCN1A
Depression, Bipolar	3/61	0.000599395	0.0449684	0	0	18.2149	135.147	NTRK1;SNAP25;ATP1A3
Heroin Dependence	3/62	0.000628675	0.0461091	0	0	17.9211	132.113	GABRB2;GRIN2A;DRD2
Animal Mammary Neoplasms	4/145	0.000632625	0.0453828	0	0	10.2171	75.2555	GDA;ACTN4;HRAS;ADCY5
Mammary Carcinoma, Animal	4/145	0.000632625	0.0457165	0	0	10.2171	75.2555	GDA;ACTN4;HRAS;ADCY5
Frontotemporal dementia	4/145	0.000632625	0.0460551	0	0	10.2171	75.2555	SNAP25;SYN1;MAPK3;SOD1
Global developmental delay	10/1102	0.000645262	0.0459539	0	0	3.36089	24.6886	NTRK1;SNAP25;GRIN2A;NRXN1;CHMP1A;NR2F1;ATP1A3;HRAS;AHDC1;SCN1A
Metabolic Syndrome X	7/548	0.000647564	0.045786	0	0	4.73101	34.7365	CAMK2B;PHF2;GPX1;CD38;ANK2;DRD2;MAPK3
Epilepsy, Cryptogenic	3/63	0.000658853	0.0462515	0	0	17.6367	129.189	GRIN2A;GPX1;SCN1A
Colorectal Cancer	19/3298	0.000661565	0.0461125	0	0	2.13373	15.6208	NTRK1;PHF2;GPX1;LRP1;TET2;ANK2;ACTN4;PPP1R9B;SOD1;GRIN2A;DPYSL2;DNER;CD38;DRD2;HRAS;MET;SF3B1;SCN1A;MAPK3
Monosomy	4/147	0.000665985	0.0460937	0	0	10.0781	73.7137	NTRK1;TET2;SF3B1;SOD1
Mastocytosis	3/64	0.00068994	0.0474177	0	0	17.3611	126.37	NTRK1;TET2;SF3B1
Brain Ischemia	5/264	0.000719731	0.0491216	0	0	7.01459	50.762	GPX1;DPYSL2;DRD2;MAPK3;SOD1
Memory impairment	5/267	0.000757259	0.0513265	0	0	6.93577	49.8391	CX3CR1;ADORA2A;DRD2;MAPK3;SOD1
Mastocytosis, Systemic	3/67	0.000788772	0.0530962	0	0	16.5837	118.491	NTRK1;DNER;TET2
Other specified transient cerebral ischemias	4/155	0.000811973	0.0542862	0	0	9.55795	68.0148	CX3CR1;MBD3;NRXN1;ANK2
Attention deficit hyperactivity disorder	6/412	0.000825442	0.0548138	0	0	5.39374	38.2934	NTRK1;SNAP25;GRIN2A;ADORA2A;PPP1R1B;DRD2
Morphine Dependence	2/16	0.000838041	0.0538318	0	0	46.2963	327.983	GRIN2A;DRD2
Lingual-Facial-Buccal Dyskinesia	2/16	0.000838041	0.054186	0	0	46.2963	327.983	PPP1R1B;DRD2
Waxy flexibility	2/16	0.000838041	0.0545448	0	0	46.2963	327.983	PPP1R1B;DRD2
SPHEROCYTOSIS, TYPE 1 (disorder)	2/16	0.000838041	0.0549084	0	0	46.2963	327.983	GRIN2A;MAPK3
RETINOSCHISIS 1, X-LINKED, JUVENILE	2/16	0.000838041	0.055277	0	0	46.2963	327.983	TET2;SF3B1
Anxiety disease	4/157	0.000851733	0.0543561	0	0	9.43619	66.6972	ATP1A3;DRD2;ADCY5;SOD1
Neck Neoplasms	3/70	0.000896181	0.0564594	0	0	15.873	111.387	GPX1;HRAS;MAPK3
Chromosome 8, trisomy	3/70	0.000896181	0.0568236	0	0	15.873	111.387	TET2;CD38;SF3B1
Mammary Neoplasms, Experimental	4/160	0.000913925	0.0572105	0	0	9.25926	64.7941	GDA;ACTN4;HRAS;ADCY5
Weight decreased	4/161	0.000935348	0.058181	0	0	9.20175	64.1784	ADORA2A;GABRA3;TET2;SOD1
de novo myelodysplastic syndromes	2/17	0.000948138	0.0582394	0	0	43.573	303.312	TET2;SF3B1
Childhood Myelodysplastic Syndrome	2/17	0.000948138	0.0586057	0	0	43.573	303.312	TET2;SF3B1
secondary acute myeloid leukemia	3/72	0.000972693	0.0593766	0	0	15.4321	107.028	DNER;TET2;SF3B1
Psychoses, Substance-Induced	2/18	0.00106481	0.0645986	0	0	41.1523	281.685	CAMK2B;ADORA2A
Dementia	6/436	0.00110578	0.066266	0	0	5.09684	34.6952	GPX1;LRP1;TET2;CD38;SF3B1;SOD1
nervous system disorder	6/436	0.00110578	0.0666726	0	0	5.09684	34.6952	SNAP25;CELF4;ATP1A3;DRD2;SCN1A;SOD1
Degenerative polyarthritis	9/976	0.00111027	0.0661315	0	0	3.4153	23.2348	CAMK2B;SLC25A27;LRP1;DPYSL2;CD38;ATP1A3;MET;MAPK3;SOD1
Fibrosis	4/169	0.00111967	0.0662896	0	0	8.76616	59.5637	CX3CR1;ADORA2A;ADCY5;MAPK3
Congenital Abnormality	7/607	0.00117709	0.0692719	0	0	4.27116	28.8077	NTRK1;NRXN1;CD38;DRD2;SCN1A;MAPK3;SOD1
Myoclonic dystonia	2/19	0.00118803	0.0682803	0	0	38.9864	262.591	DRD2;ADCY5
Agoraphobia	2/19	0.00118803	0.068682	0	0	38.9864	262.591	ADORA2A;DRD2
THANATOPHORIC DYSPLASIA, TYPE I (disorder)	2/19	0.00118803	0.0690884	0	0	38.9864	262.591	CD38;HRAS
Refractory anemia with ringed sideroblasts	2/19	0.00118803	0.0694996	0	0	38.9864	262.591	TET2;SF3B1
Adenocarcinoma of large intestine	5/297	0.001218	0.0695962	0	0	6.23519	41.8415	CAMK2B;NTRK1;HRAS;MET;SRSF11
Precancerous Conditions	6/446	0.00124214	0.0705649	0	0	4.98256	33.3379	DPP10;TET2;CD38;HRAS;MET;MAPK3
Mammary Tumorigenesis	4/176	0.00130069	0.0734667	0	0	8.41751	55.9332	INTS1;PPP1R1B;HRAS;MET
Panic Attacks	2/20	0.00131775	0.0727576	0	0	37.037	245.623	ADORA2A;DRD2
Alveolar Soft Part Sarcoma	2/20	0.00131775	0.0731687	0	0	37.037	245.623	CD38;MET
Adult Myelodysplastic Syndrome	2/20	0.00131775	0.0735844	0	0	37.037	245.623	TET2;SF3B1
Adenocarcinoma of lung, stage I	2/20	0.00131775	0.0740049	0	0	37.037	245.623	ACTN4;MET
idiopathic epilepsy	2/21	0.00145395	0.0793854	0	0	35.2734	230.458	SYN1;SCN1A
Hemiplegia	2/21	0.00145395	0.0798289	0	0	35.2734	230.458	ATP1A3;SCN1A
Epileptic encephalopathy	6/468	0.00158741	0.0861939	0	0	4.74834	30.6061	GABRB2;GRIN2A;NRXN1;ATP1A3;HRAS;SCN1A
Basal-Like Breast Carcinoma	2/22	0.00159658	0.0852781	0	0	33.67	216.831	NTRK1;MET
Psychosis, Brief Reactive	2/22	0.00159658	0.0857441	0	0	33.67	216.831	NTRK1;SNAP25
Psychoses, Drug	2/22	0.00159658	0.0862152	0	0	33.67	216.831	CAMK2B;ADORA2A
Malignant Peripheral Nerve Sheath Tumor	4/188	0.00165716	0.0880353	0	0	7.88022	50.4543	CD38;MET;SYN1;MAPK3
Amyloidosis	8/833	0.00166612	0.0880356	0	0	3.55698	22.7549	DPP10;CX3CR1;SNAP25;LRP1;PPP1R1B;APBB1;MAPK3;SOD1
Chronic active hepatitis	3/87	0.00168011	0.0883003	0	0	12.7714	81.5951	GPX1;MET;SOD1
Acute Promyelocytic Leukemia	6/475	0.00171134	0.089463	0	0	4.67836	29.8034	MBD3;TET2;CD38;SF3B1;MAPK3;SOD1
Adenocarcinoma	12/1712	0.00172004	0.0894422	0	0	2.59605	16.5249	CX3CR1;NTRK1;SNAP25;GPX1;LRP1;PPP1R1B;ACTN4;HRAS;MET;SCN1A;MAPK3;SOD1
Chordoma	3/88	0.00173611	0.0898026	0	0	12.6263	80.2539	NTRK1;CD38;MET
Hypoplastic myelodysplasia	2/23	0.00174561	0.0898214	0	0	32.2061	204.53	TET2;SF3B1
Solid Neoplasm	8/840	0.00175633	0.0899022	0	0	3.52734	22.3793	NTRK1;ADORA2A;DNER;TET2;CD38;HRAS;MET;SF3B1
Glioma	14/2211	0.00176301	0.0897766	0	0	2.34518	14.8701	CAMK2B;CX3CR1;NTRK1;GPX1;LRP1;TET2;PPP1R9B;SOD1;DNER;DLGAP3;DRD2;HRAS;MET;MAPK3
Obesity	13/1961	0.00177119	0.089728	0	0	2.45529	15.5569	CX3CR1;SNAP25;PHF2;GPX1;LRP1;GABRA3;CELF4;ADCY5;SOD1;CD38;DRD2;HRAS;MAPK3
Hypotension	3/89	0.00179326	0.0903804	0	0	12.4844	78.9478	ADORA2A;DRD2;SOD1
Pelger-Huet Anomaly	2/24	0.00190102	0.0943596	0	0	30.8642	193.375	TET2;SF3B1
Catalepsy	2/24	0.00190102	0.0948386	0	0	30.8642	193.375	PPP1R1B;DRD2
Helminthiasis	2/24	0.00190102	0.0953225	0	0	30.8642	193.375	CD38;SOD1
Prolactinoma	3/91	0.00191107	0.0943818	0	0	12.21	76.4358	NTRK1;SNAP25;DRD2
Non-Small Cell Lung Carcinoma	14/2243	0.00202179	0.0993506	0	0	2.31172	14.3414	DPP10;CX3CR1;NTRK1;MBD3;LRP1;TET2;ACTN4;SOD1;DPYSL2;DRD2;HRAS;MET;SF3B1;MAPK3
Infection	6/492	0.00204302	0.0998945	0	0	4.51671	27.9735	CX3CR1;NTRK1;CD38;HRAS;MAPK3;SOD1
Pyemia	2/25	0.00206276	0.0998659	0	0	29.6296	183.221	ADORA2A;MAPK3
Specific language impairment	2/25	0.00206276	0.10036	0	0	29.6296	183.221	NRXN1;SYN1
Myelodysplasia	3/94	0.00209665	0.101009	0	0	11.8203	72.9009	TET2;HRAS;SF3B1
Muscle Weakness	5/339	0.00217598	0.104319	0	0	5.46269	33.4878	SNAP25;ATP1A3;ETFB;MET;SOD1
Adult T-Cell Lymphoma/Leukemia	6/500	0.00221502	0.105676	0	0	4.44444	27.1666	CX3CR1;SNAP25;LRP1;TET2;CD38;MET
PARKINSON DISEASE 2, AUTOSOMAL RECESSIVE JUVENILE	3/96	0.00222639	0.105705	0	0	11.5741	70.6872	CX3CR1;ATP1A3;DRD2
Spasmodic torticollis	2/26	0.0022308	0.105405	0	0	28.49	173.943	ATP1A3;DRD2
Myeloid Leukemia	6/501	0.00223727	0.105205	0	0	4.43557	27.0681	NTRK1;TET2;CD38;MET;SF3B1;SOD1
Myeloid Leukemia, Chronic	8/876	0.00228359	0.106872	0	0	3.38238	20.5717	NTRK1;SNAP25;TET2;CD38;HRAS;MET;SF3B1;MAPK3
Malignant Glioma	6/504	0.00230503	0.107364	0	0	4.40917	26.7754	CX3CR1;NTRK1;DNER;HRAS;MET;SOD1
Cytopenia	4/206	0.00231161	0.107163	0	0	7.19166	43.652	GPX1;TET2;HRAS;SF3B1
Hypertensive disease	10/1310	0.00238281	0.109945	0	0	2.82725	17.0751	CX3CR1;GPX1;ADORA2A;LRP1;TET2;ACTN4;DRD2;PPP1R9B;ADCY5;SOD1
Congenital anemia	4/208	0.00239387	0.108921	0	0	7.12251	42.9832	GPX1;TET2;HRAS;SF3B1
Ataxia	4/208	0.00239387	0.109428	0	0	7.12251	42.9832	SNAP25;GRIN2A;ATP1A3;SCN1A
Adenoid Cystic Carcinoma	4/208	0.00239387	0.109939	0	0	7.12251	42.9832	NTRK1;HRAS;SF3B1;MAPK3
Chronic Lung Injury	2/27	0.0024051	0.108928	0	0	27.4348	165.437	NTRK1;SOD1
Recurrent tumor	5/347	0.00240741	0.108532	0	0	5.33675	32.1763	GPX1;HRAS;MET;SCN1A;MAPK3
Congestive heart failure	8/884	0.00241619	0.108431	0	0	3.35177	20.1963	CX3CR1;SNAP25;ADORA2A;DNER;ATP1A3;ANK2;ACTN4;SOD1
Trisomy	4/209	0.00243574	0.108811	0	0	7.08843	42.6546	GRIN2A;CD38;MET;SOD1
Neurofibromatosis 1	4/210	0.00247812	0.110203	0	0	7.05467	42.3298	DPYSL2;CD38;HRAS;MAPK3
Mood swings	3/100	0.00250059	0.110702	0	0	11.1111	66.5692	NTRK1;ATP1A3;SOD1
Ewings sarcoma	5/352	0.00256089	0.112863	0	0	5.26094	31.3942	NTRK1;LRP1;DNER;CD38;MET
Congenital contractural arachnodactyly	4/212	0.00256439	0.112513	0	0	6.98812	41.6914	TET2;ACTN4;SF3B1;MAPK3
Forced expiratory volume function	3/101	0.00257226	0.112356	0	0	11.0011	65.5992	LRP1;TSHZ3;CELF4
Ramsay Hunt Paralysis Syndrome	2/28	0.00258564	0.110007	0	0	26.455	157.613	ATP1A3;DRD2
Cerebral Astrocytoma	2/28	0.00258564	0.110486	0	0	26.455	157.613	HRAS;MET
Autosomal Dominant Juvenile Parkinson Disease	2/28	0.00258564	0.110968	0	0	26.455	157.613	ATP1A3;DRD2
Parkinsonism, Experimental	2/28	0.00258564	0.111455	0	0	26.455	157.613	ATP1A3;DRD2
Hyperglycemia, Postprandial	2/28	0.00258564	0.111946	0	0	26.455	157.613	GPX1;GABRA3
Familial Juvenile Parkinsonism	2/28	0.00258564	0.112441	0	0	26.455	157.613	ATP1A3;DRD2
Multiple Sclerosis	9/1106	0.00262543	0.111218	0	0	3.01386	17.9099	CX3CR1;SLC25A27;NTRK1;LRP1;DPYSL2;GABRA3;TET2;DRD2;SOD1
Epithelial ovarian cancer	10/1329	0.00264716	0.111658	0	0	2.78683	16.5378	CX3CR1;NTRK1;GPX1;DNER;ACTN4;HRAS;MET;SCN1A;MAPK3;SOD1
Parkinsonian Disorders	4/214	0.00265272	0.111414	0	0	6.92281	41.0673	PPP1R1B;ATP1A3;DRD2;SOD1
Upper Aerodigestive Tract Neoplasms	2/29	0.00277238	0.114966	0	0	25.5428	150.397	GPX1;MAPK3
Torticollis	2/29	0.00277238	0.115453	0	0	25.5428	150.397	ATP1A3;DRD2
Head Neoplasms	2/29	0.00277238	0.115945	0	0	25.5428	150.397	GPX1;MAPK3
Tonic Seizures	3/104	0.00279484	0.11541	0	0	10.6838	62.8203	ADORA2A;DRD2;SCN1A
Delayed speech and language development	4/220	0.0029302	0.120494	0	0	6.73401	39.2773	GRIN2A;ATP1A3;AHDC1;SCN1A
Leukemia, T-Cell	5/364	0.00295817	0.121137	0	0	5.08751	29.6255	SNAP25;LRP1;TET2;CD38;MET
Overlap syndrome	2/30	0.00296529	0.119438	0	0	24.6914	143.723	TET2;SF3B1
Cancer of Neck	2/30	0.00296529	0.119929	0	0	24.6914	143.723	GPX1;MAPK3
Cancer of Head	2/30	0.00296529	0.120425	0	0	24.6914	143.723	GPX1;MAPK3
Ventricular Dysfunction, Left	2/30	0.00296529	0.120925	0	0	24.6914	143.723	ATP1A3;ADCY5
Leukemia, Myelomonocytic, Chronic	3/108	0.0031096	0.12474	0	0	10.2881	59.3957	TET2;HRAS;SF3B1
Antisocial Personality Disorder	2/31	0.00316432	0.125399	0	0	23.8949	137.534	SNAP25;DRD2
Histiocytic sarcoma	2/31	0.00316432	0.125907	0	0	23.8949	137.534	HRAS;MET
Refractory anemia, without ringed sideroblasts, without excess blasts	2/31	0.00316432	0.126419	0	0	23.8949	137.534	TET2;SF3B1
Pulmonary Emphysema	4/225	0.00317614	0.125362	0	0	6.58436	37.8738	CX3CR1;GPX1;MAPK3;SOD1
Convulsive Seizures	3/109	0.00319156	0.124967	0	0	10.1937	58.5856	ADORA2A;DRD2;SCN1A
Schizoaffective Disorder	3/109	0.00319156	0.125466	0	0	10.1937	58.5856	NTRK1;SNAP25;DRD2
Lymphoma, Non-Hodgkin	6/539	0.00321553	0.125406	0	0	4.12286	23.6642	CX3CR1;GPX1;TET2;HRAS;SF3B1;MAPK3
Tremor	4/226	0.00322697	0.125354	0	0	6.55523	37.6022	ADORA2A;GABRA3;DRD2;SCN1A
Aggressive reaction	3/110	0.00327482	0.126216	0	0	10.101	57.7928	SYN1;SCN1A;MAPK3
Reperfusion Injury	3/110	0.00327482	0.126712	0	0	10.101	57.7928	GPX1;ADORA2A;SOD1
Cannabis Dependence	2/32	0.00336946	0.128353	0	0	23.1481	131.782	CAMK2B;DRD2
Anhedonia	2/32	0.00336946	0.128852	0	0	23.1481	131.782	ATP1A3;DRD2
Hypereosinophilia	2/32	0.00336946	0.129356	0	0	23.1481	131.782	TET2;SF3B1
Skin Erosion	3/112	0.00344534	0.130737	0	0	9.92063	56.2573	TET2;SF3B1;MAPK3
Cocaine-Related Disorders	3/113	0.0035326	0.132009	0	0	9.83284	55.5135	CAMK2B;DRD2;MAPK3
Alloxan Diabetes	3/113	0.0035326	0.132513	0	0	9.83284	55.5135	SNAP25;GPX1;SOD1
Streptozotocin Diabetes	3/113	0.0035326	0.133021	0	0	9.83284	55.5135	SNAP25;GPX1;SOD1
Diabetes Mellitus, Experimental	3/113	0.0035326	0.133532	0	0	9.83284	55.5135	SNAP25;GPX1;SOD1
Mixed oligoastrocytoma	2/33	0.00358066	0.131309	0	0	22.4467	126.424	HRAS;MET
Autosomal Dominant Parkinsonism	2/33	0.00358066	0.1318	0	0	22.4467	126.424	ATP1A3;DRD2
Hyperkinesia, Generalized	2/33	0.00358066	0.132296	0	0	22.4467	126.424	ADORA2A;DRD2
Fibrillary Astrocytoma	2/33	0.00358066	0.132795	0	0	22.4467	126.424	HRAS;MET
Refractory anaemia with excess blasts	2/33	0.00358066	0.133298	0	0	22.4467	126.424	TET2;SF3B1
Lymphocyte Count measurement	3/114	0.00362121	0.132302	0	0	9.74659	54.7851	CX3CR1;TET2;ADCY5
Tumor Initiation	4/234	0.00365376	0.132997	0	0	6.33112	35.5302	NTRK1;MET;SCN1A;MAPK3
Epileptic drop attack	3/115	0.00371117	0.134588	0	0	9.66184	54.0716	ADORA2A;DRD2;SCN1A
Neuroectodermal Tumors	2/34	0.00379789	0.13573	0	0	21.7865	121.423	HRAS;MET
Autosomal Recessive Parkinsonism	2/34	0.00379789	0.136225	0	0	21.7865	121.423	ATP1A3;DRD2
Sarcoma, Spindle Cell	2/34	0.00379789	0.136724	0	0	21.7865	121.423	NTRK1;MET
Richter's syndrome	2/34	0.00379789	0.137227	0	0	21.7865	121.423	CD38;SF3B1
Complex partial seizures	3/116	0.00380248	0.134427	0	0	9.57854	53.3726	ADORA2A;DRD2;SCN1A
Liver Neoplasms, Experimental	3/116	0.00380248	0.134913	0	0	9.57854	53.3726	HRAS;MET;MAPK3
Experimental Hepatoma	3/116	0.00380248	0.135401	0	0	9.57854	53.3726	HRAS;MET;MAPK3
IGA Glomerulonephritis	4/237	0.00382325	0.134677	0	0	6.25098	34.797	CX3CR1;NTRK1;ACTN4;MAPK3
Malignant neoplasm of breast	23/5054	0.00401221	0.140829	0	0	1.6855	9.30129	CAMK2B;NTRK1;PHF2;GPX1;LRP1;TSHZ3;GABRA3;TET2;NR2F1;ANK2;ACTN4;SYN1;PPP1R9B;SOD1;DNER;PPP1R1B;CD38;APBB1;DRD2;HRAS;MET;SF3B1;MAPK3
Cervical Dystonia	2/35	0.00402113	0.140141	0	0	21.164	116.745	ATP1A3;DRD2
Acanthosis Nigricans	2/35	0.00402113	0.140639	0	0	21.164	116.745	NTRK1;HRAS
Hepatoma, Novikoff	3/119	0.00408464	0.141851	0	0	9.33707	51.3588	HRAS;MET;MAPK3
Cognitive delay	8/966	0.00415627	0.14383	0	0	3.06725	16.8181	NTRK1;SNAP25;CHMP1A;NR2F1;ATP1A3;HRAS;AHDC1;SCN1A
Coronary Arteriosclerosis	7/760	0.00416765	0.143718	0	0	3.41131	18.6953	CX3CR1;GPX1;ADORA2A;LRP1;ANK2;MAPK3;SOD1
Anxiety Disorders	5/396	0.0042344	0.14551	0	0	4.67639	25.5542	ADORA2A;DLGAP3;DRD2;SYN1;SOD1
Leukemia, Myeloid, Chronic, Atypical, BCR-ABL Negative	2/36	0.00425033	0.145548	0	0	20.5761	112.361	TET2;SF3B1
Papillary thyroid carcinoma	6/571	0.00426274	0.145466	0	0	3.89181	21.2409	NTRK1;GABRB2;CD38;HRAS;MET;MAPK3
Juvenile Myelomonocytic Leukemia	3/121	0.00427964	0.145035	0	0	9.18274	50.0816	TET2;CD38;SF3B1
Hepatoma, Morris	3/121	0.00427964	0.145537	0	0	9.18274	50.0816	HRAS;MET;MAPK3
Kidney Neoplasm	4/246	0.00436364	0.147374	0	0	6.02228	32.7278	CHMP1A;CD38;MET;MAPK3
Carcinoma, Transitional Cell	5/399	0.00437144	0.147132	0	0	4.64123	25.2143	SNAP25;GPX1;TET2;HRAS;MET
Cerebrovascular accident	7/768	0.00441235	0.148002	0	0	3.37577	18.308	CX3CR1;GRIN2A;GPX1;LRP1;PPP1R1B;ANK2;SOD1
Absence Seizures	3/123	0.00448022	0.149767	0	0	9.03342	48.8535	ADORA2A;DRD2;SCN1A
Chronic leukemia (category)	2/37	0.00448547	0.148428	0	0	20.02	108.247	TET2;SF3B1
ACTH-Secreting Pituitary Adenoma	2/37	0.00448547	0.14893	0	0	20.02	108.247	DRD2;MAPK3
Hematopoetic Myelodysplasia	2/37	0.00448547	0.149434	0	0	20.02	108.247	TET2;SF3B1
Immune System Diseases	4/250	0.00461957	0.152353	0	0	5.92593	31.8664	DNER;TET2;SF3B1;SOD1
Myotonic Dystrophy	3/125	0.00468642	0.154041	0	0	8.88889	47.6719	DMWD;SYN1;SOD1
Common acute lymphoblastic leukemia	2/38	0.0047265	0.15484	0	0	19.4932	104.378	SNAP25;CD38
Memory Loss	3/126	0.00479164	0.155935	0	0	8.81834	47.0977	CX3CR1;DRD2;SOD1
Generalized seizures	3/126	0.00479164	0.156453	0	0	8.81834	47.0977	ADORA2A;DRD2;SCN1A
leukemia	12/1941	0.00487009	0.157965	0	0	2.28977	12.1922	NTRK1;SNAP25;ADORA2A;LRP1;DNER;TET2;CD38;HRAS;MET;SF3B1;MAPK3;SOD1
Renal glomerular disease	3/127	0.00489829	0.158357	0	0	8.74891	46.5343	TET2;ACTN4;SF3B1
Drooling	2/39	0.00497341	0.158697	0	0	18.9934	100.734	NRXN1;ATP1A3
Stage IV Ovarian Carcinoma	2/39	0.00497341	0.159214	0	0	18.9934	100.734	CX3CR1;ACTN4
Sialorrhea	2/39	0.00497341	0.159734	0	0	18.9934	100.734	NRXN1;ATP1A3
Esotropia	2/39	0.00497341	0.160258	0	0	18.9934	100.734	CHMP1A;AHDC1
Cocaine Abuse	3/128	0.00500637	0.159232	0	0	8.68056	45.9813	CAMK2B;DRD2;MAPK3
Neuroendocrine Tumors	4/257	0.00509152	0.161417	0	0	5.76452	30.4377	NTRK1;ACTN4;HRAS;MET
Adenoma	8/1000	0.00511338	0.161589	0	0	2.96296	15.6323	NTRK1;SNAP25;GPX1;NR2F1;DRD2;HRAS;MET;MAPK3
Rett Syndrome	3/129	0.00511588	0.16115	0	0	8.61326	45.4385	GABRA3;MET;SYN1
Behcet Syndrome	4/258	0.00516148	0.162067	0	0	5.74218	30.2414	NTRK1;ETFB;MAPK3;SOD1
Motor symptoms	2/40	0.00522616	0.161518	0	0	18.5185	97.2978	ATP1A3;SOD1
Malignant neoplasm of stomach stage IV	2/40	0.00522616	0.162027	0	0	18.5185	97.2978	MET;MAPK3
Acute Myeloid Leukemia Arising from Previous Myelodysplastic Syndrome	2/40	0.00522616	0.16254	0	0	18.5185	97.2978	TET2;SF3B1
Syncope	2/40	0.00522616	0.163056	0	0	18.5185	97.2978	ADORA2A;ANK2
Anxiety States, Neurotic	2/40	0.00522616	0.163575	0	0	18.5185	97.2978	ADORA2A;DRD2
Tauopathies	3/130	0.00522682	0.161032	0	0	8.54701	44.9056	CX3CR1;ADORA2A;SOD1
Neoplasms	9/1236	0.00547021	0.168004	0	0	2.69687	14.0465	NTRK1;GPX1;LRP1;CD38;HRAS;MET;SF3B1;MAPK3;SOD1
Choreatic disease	2/41	0.00548471	0.167403	0	0	18.0668	94.0522	CHMP1A;ADCY5
Anemia, Macrocytic	2/41	0.00548471	0.167924	0	0	18.0668	94.0522	TET2;SF3B1
Absent tendon reflex	3/134	0.00568511	0.172448	0	0	8.29187	42.8682	SNAP25;ATP1A3;SBF1
Skin Carcinogenesis	3/134	0.00568511	0.172982	0	0	8.29187	42.8682	NTRK1;GPX1;HRAS
Refractory anemias	4/266	0.00574459	0.173716	0	0	5.56948	28.7357	TET2;NR2F1;SF3B1;SOD1
Rat Adrenal Gland Pheochromocytoma	2/42	0.00574903	0.172261	0	0	17.6367	90.9828	SNAP25;MAPK3
Postnatal microcephaly	2/42	0.00574903	0.172787	0	0	17.6367	90.9828	CHMP1A;SCN1A
Parkinsonism, Juvenile	2/42	0.00574903	0.173317	0	0	17.6367	90.9828	ATP1A3;DRD2
Colitis	6/608	0.00576795	0.172302	0	0	3.65497	18.843	CX3CR1;NTRK1;GPX1;TET2;MAPK3;SOD1
Mental and motor retardation	8/1021	0.00578439	0.17227	0	0	2.90202	14.9529	NTRK1;SNAP25;CHMP1A;NR2F1;ATP1A3;HRAS;AHDC1;SCN1A
Hypothyroidism	4/268	0.00589696	0.175092	0	0	5.52792	28.3766	GPX1;LRP1;DPYSL2;SOD1
Pancreatitis	4/269	0.00597415	0.176849	0	0	5.50737	28.1994	AP2S1;CD38;MET;SOD1
Transient Cerebral Ischemia	2/43	0.0060191	0.177645	0	0	17.2265	88.0761	TET2;SOD1
Absent reflex	3/137	0.00604419	0.17732	0	0	8.1103	41.4327	SNAP25;ATP1A3;SBF1
Reflex, Deep Tendon, Absent	3/137	0.00604419	0.177851	0	0	8.1103	41.4327	SNAP25;ATP1A3;SBF1
Cytomegalovirus Infections	4/270	0.00605201	0.177021	0	0	5.48697	28.0239	CX3CR1;LRP1;HRAS;MAPK3
Mental deficiency	8/1032	0.00616186	0.1797	0	0	2.87109	14.612	NTRK1;NRXN1;CHMP1A;NR2F1;ATP1A3;HRAS;AHDC1;SCN1A
Drug habituation	3/138	0.00616683	0.178784	0	0	8.05153	40.9708	CADPS2;GRIN2A;DRD2
Abdominal discomfort	3/138	0.00616683	0.179313	0	0	8.05153	40.9708	TET2;MCM6;MET
Monoclonal Gammapathies	2/44	0.00629487	0.181425	0	0	16.835	85.3202	CD38;HRAS
Behavior Disorders	2/44	0.00629487	0.181959	0	0	16.835	85.3202	CELF4;DRD2
Kidney Failure, Chronic	5/437	0.00639301	0.183715	0	0	4.23765	21.4109	CX3CR1;GPX1;ACTN4;MET;SOD1
Substance Dependence	3/140	0.00641658	0.18332	0	0	7.93651	40.0704	CADPS2;PPP1R1B;DRD2
Gastrointestinal pain	3/140	0.00641658	0.183855	0	0	7.93651	40.0704	TET2;MCM6;MET
Sleeplessness	2/45	0.00657633	0.18734	0	0	16.4609	82.7042	ADORA2A;DRD2
Depressed nasal bridge	4/277	0.00661611	0.187928	0	0	5.34831	26.8391	ATP1A3;ETFB;HRAS;AHDC1
Dysarthria	4/282	0.00703978	0.199386	0	0	5.25348	26.0372	SNAP25;GRIN2A;ATP1A3;ADCY5
Hyperparathyroidism	2/47	0.00715614	0.202099	0	0	15.7604	77.8532	AP2S1;HRAS
Myasthenic Syndromes, Congenital	2/48	0.00745444	0.209921	0	0	15.4321	75.601	NTRK1;SNAP25
Glioblastoma Multiforme	7/854	0.0077872	0.218665	0	0	3.03582	14.7398	CX3CR1;NTRK1;DNER;DLGAP3;MET;MAPK3;SOD1
Multiple Myeloma	9/1312	0.00800695	0.224194	0	0	2.54065	12.2649	LRP1;DNER;TET2;CD38;HRAS;MET;SF3B1;MAPK3;SOD1
Asthma	9/1313	0.00804548	0.224634	0	0	2.53872	12.2433	DPP10;CX3CR1;NTRK1;ADORA2A;DNER;CD38;MET;MAPK3;SOD1
Nephrosis	2/50	0.00806767	0.223349	0	0	14.8148	71.4058	CX3CR1;SOD1
Cervical Squamous Intraepithelial Neoplasia	2/50	0.00806767	0.22398	0	0	14.8148	71.4058	HRAS;MET
Idiopathic generalized epilepsy	2/50	0.00806767	0.224615	0	0	14.8148	71.4058	NRXN1;SCN1A
Abdominal Pain	3/153	0.00818708	0.226019	0	0	7.26216	34.8961	TET2;MCM6;MET
Myoclonus	3/154	0.00833399	0.22943	0	0	7.21501	34.5412	DRD2;SCN1A;ADCY5
Sarcoma	6/658	0.00838012	0.230055	0	0	3.37724	16.1496	NTRK1;CD38;HRAS;MET;SYN1;MAPK3
Focal glomerulosclerosis	3/155	0.00848245	0.232216	0	0	7.16846	34.1918	TET2;ACTN4;SF3B1
Charcot-Marie-Tooth Disease	4/298	0.0085155	0.232473	0	0	4.97141	23.6931	NTRK1;SBF1;HRAS;SOD1
Malignant Head and Neck Neoplasm	5/470	0.00861995	0.234673	0	0	3.94011	18.73	GPX1;HRAS;MET;SF3B1;MAPK3
Myoclonic Seizures	3/156	0.00863247	0.234364	0	0	7.12251	33.8478	ADORA2A;DRD2;SCN1A
Gait, Unsteady	2/52	0.00870286	0.235625	0	0	14.245	67.5798	ATP1A3;SOD1
Tumor Progression	12/2090	0.00872047	0.235453	0	0	2.12653	10.0842	NTRK1;GPX1;LRP1;CHMP1A;DNER;PPP1R1B;DRD2;HRAS;MET;PPP1R9B;MAPK3;SOD1
Cocaine Dependence	3/157	0.00878404	0.236519	0	0	7.07714	33.509	CAMK2B;DRD2;MAPK3
Cutaneous Melanoma	4/301	0.00881309	0.236008	0	0	4.92187	23.2879	MCM6;HRAS;SF3B1;MAPK3
Senile Plaques	4/301	0.00881309	0.236653	0	0	4.92187	23.2879	LRP1;APBB1;SYN1;SOD1
Rheumatoid Arthritis	11/1833	0.0088851	0.23729	0	0	2.22263	10.4983	CX3CR1;ADORA2A;LRP1;DNER;TET2;NR2F1;CD38;MET;SF3B1;MAPK3;SOD1
NEUROTICISM	2/53	0.00902862	0.235993	0	0	13.9762	65.7911	SNAP25;DRD2
Bradycardia	2/53	0.00902862	0.236622	0	0	13.9762	65.7911	ANK2;DRD2
Mental deterioration	2/53	0.00902862	0.237255	0	0	13.9762	65.7911	ATP1A3;SCN1A
Anxiety neurosis (finding)	2/53	0.00902862	0.237891	0	0	13.9762	65.7911	ADORA2A;DRD2
Hypophosphatemia	2/53	0.00902862	0.23853	0	0	13.9762	65.7911	AP2S1;HRAS
Turner Syndrome, Male	2/53	0.00902862	0.239173	0	0	13.9762	65.7911	HRAS;MAPK3
Other specified types of schizophrenia, unspecified	2/53	0.00902862	0.23982	0	0	13.9762	65.7911	SNAP25;NRXN1
Hyperparathyroidism, Primary	2/53	0.00902862	0.240469	0	0	13.9762	65.7911	AP2S1;CD38
Colorectal Carcinoma	15/2931	0.00910754	0.237424	0	0	1.89545	8.90605	NTRK1;PHF2;GPX1;LRP1;TET2;ACTN4;PPP1R9B;SOD1;GRIN2A;DRD2;HRAS;MET;SF3B1;SCN1A;MAPK3
Cardiomyopathies	5/480	0.00938942	0.244125	0	0	3.85802	18.0099	ADORA2A;LRP1;CELF4;ADCY5;MAPK3
Renal Cell Carcinoma	9/1348	0.00948683	0.246007	0	0	2.4728	11.5179	NTRK1;INTS1;CHMP1A;TET2;CD38;MCM6;MET;SF3B1;MAPK3
Pain	5/485	0.00979146	0.253238	0	0	3.81825	17.6642	CX3CR1;NTRK1;DRD2;PPP1R9B;SOD1
Cystitis	2/56	0.0100382	0.256914	0	0	13.2275	60.8646	CX3CR1;SOD1
Channelopathies	2/56	0.0100382	0.257585	0	0	13.2275	60.8646	ANK2;SCN1A
Treatment related acute myeloid leukaemia	2/56	0.0100382	0.258259	0	0	13.2275	60.8646	TET2;SF3B1
HER2 gene amplification	2/56	0.0100382	0.258937	0	0	13.2275	60.8646	NTRK1;MET
Hyperglycemia	5/488	0.0100383	0.256251	0	0	3.79478	17.4611	SNAP25;GPX1;DRD2;ADCY5;SOD1
Atrial Septal Defects	3/165	0.0100531	0.255964	0	0	6.73401	30.9756	SNAP25;HRAS;MAPK3
Classical Hodgkin's Lymphoma	3/166	0.0102189	0.258177	0	0	6.69344	30.6795	SNAP25;CD38;MET
Anaplastic astrocytoma	3/166	0.0102189	0.258842	0	0	6.69344	30.6795	TET2;MET;SF3B1
VITILIGO-ASSOCIATED MULTIPLE AUTOIMMUNE DISEASE SUSCEPTIBILITY 1 (finding)	3/166	0.0102189	0.259511	0	0	6.69344	30.6795	MBD3;MAPK3;SOD1
Atrophic	2/57	0.0103853	0.26171	0	0	12.9955	59.3549	MAPK3;SOD1
Progressive Neoplastic Disease	3/167	0.0103862	0.259734	0	0	6.65336	30.3878	CD38;SF3B1;SOD1
Transitional cell carcinoma of bladder	3/167	0.0103862	0.260396	0	0	6.65336	30.3878	HRAS;SF3B1;MAPK3
Ataxias, Hereditary	3/167	0.0103862	0.261062	0	0	6.65336	30.3878	SNAP25;CHMP1A;ATP1A3
Progressive cGVHD	3/169	0.0107256	0.266864	0	0	6.57462	29.8167	CD38;SF3B1;SOD1
Papillary Renal Cell Carcinoma	3/169	0.0107256	0.267542	0	0	6.57462	29.8167	TET2;CD38;MET
Wide anterior fontanel	2/58	0.0107378	0.265821	0	0	12.7714	57.9053	ETFB;HRAS
SCHIZOPHRENIA 1 (disorder)	2/58	0.0107378	0.266492	0	0	12.7714	57.9053	SNAP25;NRXN1
Developmental Disabilities	3/170	0.0108977	0.269103	0	0	6.53595	29.5372	NRXN1;DRD2;HRAS
Drug Resistant Epilepsy	2/59	0.0110955	0.272616	0	0	12.5549	56.5125	GRIN2A;SCN1A
Sleep Apnea Syndromes	2/59	0.0110955	0.273299	0	0	12.5549	56.5125	AHDC1;SOD1
T-Cell Lymphoma	4/324	0.0113232	0.277517	0	0	4.57247	20.4888	SNAP25;LRP1;TET2;MET
Tonic - clonic seizures	3/173	0.0114237	0.279284	0	0	6.42261	28.7223	ADORA2A;DRD2;SCN1A
Post-Traumatic Osteoporosis	2/60	0.0114584	0.278745	0	0	12.3457	55.1733	GPX1;ADCY5
Ventricular arrhythmia	2/60	0.0114584	0.279437	0	0	12.3457	55.1733	ANK2;MET
Malignant neoplasm of thyroid	5/505	0.0115189	0.279525	0	0	3.66703	16.3688	NTRK1;DNER;HRAS;MET;MAPK3
Noonan Syndrome	2/61	0.0118265	0.284183	0	0	12.1433	53.8848	HRAS;MAPK3
Hemiparesis	2/61	0.0118265	0.284879	0	0	12.1433	53.8848	ATP1A3;SCN1A
Sinusitis	2/61	0.0118265	0.285579	0	0	12.1433	53.8848	MET;PPP1R9B
Cholestasis, Extrahepatic	2/61	0.0118265	0.286282	0	0	12.1433	53.8848	CX3CR1;MAPK3
Liver Failure	3/176	0.0119642	0.286092	0	0	6.31313	27.9409	TET2;MET;SF3B1
Anaplastic thyroid carcinoma	3/176	0.0119642	0.28679	0	0	6.31313	27.9409	NTRK1;DNER;MET
Marijuana Abuse	2/62	0.0121997	0.291017	0	0	11.9474	52.6445	CAMK2B;DRD2
Bulbo-Spinal Atrophy, X-Linked	2/63	0.0125781	0.299317	0	0	11.7578	51.4497	MET;SOD1
Carcinoma of lung	13/2476	0.0128713	0.305553	0	0	1.94459	8.46434	CX3CR1;NTRK1;MBD3;GPX1;LRP1;GABRA3;ACTN4;SOD1;DPYSL2;DRD2;HRAS;MET;MAPK3
Cortical Dysplasia	2/64	0.0129616	0.306218	0	0	11.5741	50.2982	GRIN2A;HRAS
Osteoporosis, Senile	2/64	0.0129616	0.306956	0	0	11.5741	50.2982	GPX1;ADCY5
Lung Neoplasms	8/1177	0.0131025	0.308804	0	0	2.51739	10.9128	GPX1;LRP1;GABRA3;HRAS;MET;PPP1R9B;MAPK3;SOD1
Glioblastoma	11/1937	0.0131614	0.309451	0	0	2.10329	9.10822	CX3CR1;NTRK1;LRP1;DNER;CD38;DLGAP3;DRD2;HRAS;MET;MAPK3;SOD1
Neoplasm Invasiveness	3/183	0.0132819	0.310797	0	0	6.07165	26.2377	HRAS;MET;MAPK3
Hepatitis, Chronic	3/183	0.0132819	0.311538	0	0	6.07165	26.2377	GPX1;MET;SOD1
Dull intelligence	7/947	0.0132823	0.309333	0	0	2.73769	11.8304	NTRK1;CHMP1A;NR2F1;ATP1A3;HRAS;AHDC1;SCN1A
Low intelligence	7/947	0.0132823	0.310068	0	0	2.73769	11.8304	NTRK1;CHMP1A;NR2F1;ATP1A3;HRAS;AHDC1;SCN1A
Rhabdomyolysis	2/65	0.0133502	0.310179	0	0	11.396	49.1877	GABRA3;ETFB
Pulmonary Stenosis	2/66	0.0137438	0.317821	0	0	11.2233	48.1164	NRXN1;HRAS
Thyroid Nodule	2/66	0.0137438	0.318571	0	0	11.2233	48.1164	NTRK1;HRAS
Diabetes Mellitus, Insulin-Dependent	7/956	0.0139332	0.321446	0	0	2.71192	11.5893	GPX1;ADORA2A;NRXN1;CD38;ACTN4;HRAS;SOD1
Vomiting	3/187	0.0140707	0.323858	0	0	5.94177	25.3337	ETFB;MET;MAPK3
Malignant Neoplasms	9/1438	0.0141012	0.3238	0	0	2.31803	9.8783	NTRK1;DNER;TET2;CD38;DRD2;HRAS;MET;SF3B1;MAPK3
Multiple Chronic Conditions	2/67	0.0141424	0.322486	0	0	11.0558	47.0821	NTRK1;LRP1
West Syndrome	2/67	0.0141424	0.323236	0	0	11.0558	47.0821	NR2F1;SCN1A
Gestational Diabetes	2/67	0.0141424	0.32399	0	0	11.0558	47.0821	GPX1;MET
Familial Alzheimer Disease (FAD)	3/188	0.014272	0.324689	0	0	5.91017	25.115	DPYSL2;APBB1;SOD1
Encephalomyelitis	4/348	0.0143928	0.326679	0	0	4.25713	18.0546	CX3CR1;NTRK1;DPYSL2;SOD1
Astrocytoma	6/741	0.0144576	0.327394	0	0	2.99895	12.7052	CX3CR1;NTRK1;ACTN4;HRAS;MET;MAPK3
Carcinoma, Large Cell	2/68	0.014546	0.328639	0	0	10.8932	46.0832	HRAS;MET
cervical cancer	7/965	0.0146069	0.329259	0	0	2.68662	11.3544	NTRK1;TET2;SBF1;HRAS;MET;SCN1A;MAPK3
Leukemia, Myelocytic, Acute	10/1703	0.0146567	0.329626	0	0	2.17481	9.18391	NTRK1;LRP1;INTS1;DNER;TET2;CD38;HRAS;MET;SF3B1;MAPK3
Hematopoietic Neoplasms	3/192	0.0150937	0.338677	0	0	5.78704	24.2678	TET2;MET;SF3B1
Developmental delay (disorder)	3/193	0.0153032	0.342596	0	0	5.75705	24.0627	NRXN1;HRAS;AHDC1
Philadelphia chromosome-positive acute lymphoblastic leukemia	2/70	0.015368	0.343266	0	0	10.582	44.1848	SNAP25;CD38
Carcinoma, Papillary	3/196	0.0159417	0.355271	0	0	5.66893	23.4627	NTRK1;HRAS;MET
Elevated alpha-fetoprotein	1/6	0.0160929	0.326105	0	0	61.7284	254.9	MET
EEG with focal sharp slow waves	1/6	0.0160929	0.326779	0	0	61.7284	254.9	SCN1A
Processing speed	1/6	0.0160929	0.327456	0	0	61.7284	254.9	DRD2
Deep-set nails	1/6	0.0160929	0.328135	0	0	61.7284	254.9	HRAS
Persistent pulmonary hypertension	1/6	0.0160929	0.328817	0	0	61.7284	254.9	SOD1
Papillary transitional cell carcinoma	1/6	0.0160929	0.329502	0	0	61.7284	254.9	HRAS
Other specified senile psychotic conditions	1/6	0.0160929	0.33019	0	0	61.7284	254.9	DRD2
Childhood Hepatocellular Carcinoma	1/6	0.0160929	0.330881	0	0	61.7284	254.9	MET
Mixed bipolar I disorder	1/6	0.0160929	0.331575	0	0	61.7284	254.9	ATP1A3
Bonnevie-Ullrich Syndrome	1/6	0.0160929	0.332271	0	0	61.7284	254.9	SOD1
Methamphetamine abuse	1/6	0.0160929	0.332971	0	0	61.7284	254.9	DRD2
Malformation of head shape	1/6	0.0160929	0.333673	0	0	61.7284	254.9	HRAS
Malformation of cranium shape	1/6	0.0160929	0.334379	0	0	61.7284	254.9	HRAS
Malformation of cranial vault shape	1/6	0.0160929	0.335087	0	0	61.7284	254.9	HRAS
ATRIAL SEPTAL DEFECT 1	1/6	0.0160929	0.335798	0	0	61.7284	254.9	SNAP25
Asymmetry of head	1/6	0.0160929	0.336513	0	0	61.7284	254.9	HRAS
Asymmetric growth	1/6	0.0160929	0.33723	0	0	61.7284	254.9	HRAS
Alpha fetoprotein abnormal	1/6	0.0160929	0.337951	0	0	61.7284	254.9	MET
Lactose Intolerance	1/6	0.0160929	0.338675	0	0	61.7284	254.9	MCM6
Afebrile seizure	1/6	0.0160929	0.339401	0	0	61.7284	254.9	SCN1A
Intestinal obstruction co-occurrent and due to decreased peristalsis	1/6	0.0160929	0.340131	0	0	61.7284	254.9	HRAS
Upper motor neuron signs	1/6	0.0160929	0.340864	0	0	61.7284	254.9	SOD1
Abnormality of head shape	1/6	0.0160929	0.341601	0	0	61.7284	254.9	HRAS
Abnormality of finger	1/6	0.0160929	0.34234	0	0	61.7284	254.9	HRAS
Abnormality of dental color	1/6	0.0160929	0.343083	0	0	61.7284	254.9	HRAS
Abnormality of cranium shape	1/6	0.0160929	0.343828	0	0	61.7284	254.9	HRAS
Abnormality of cranial vault shape	1/6	0.0160929	0.344578	0	0	61.7284	254.9	HRAS
Trisomy X syndrome	1/6	0.0160929	0.34533	0	0	61.7284	254.9	CD38
Trichilemmoma	1/6	0.0160929	0.346086	0	0	61.7284	254.9	HRAS
Sarcoma, metastatic	1/6	0.0160929	0.346844	0	0	61.7284	254.9	NTRK1
Symptomatic Generalized Epilepsy	1/6	0.0160929	0.347607	0	0	61.7284	254.9	SCN1A
Hereditary Sensory Radicular Neuropathy	1/6	0.0160929	0.348372	0	0	61.7284	254.9	NTRK1
Hepatoblastoma Caused By Somatic Mutation	1/6	0.0160929	0.349141	0	0	61.7284	254.9	MET
Splenic Neoplasms	1/6	0.0160929	0.349914	0	0	61.7284	254.9	HRAS
Memory, Short-Term	1/6	0.0160929	0.35069	0	0	61.7284	254.9	DRD2
Glutaric acidemia	1/6	0.0160929	0.351469	0	0	61.7284	254.9	ETFB
Sinus bradycardia	1/6	0.0160929	0.352252	0	0	61.7284	254.9	ANK2
HYPOCALCIURIC HYPERCALCEMIA, FAMILIAL, TYPE III	1/6	0.0160929	0.353038	0	0	61.7284	254.9	AP2S1
Sex Chromosome Aberrations	1/6	0.0160929	0.353828	0	0	61.7284	254.9	NTRK1
Hemiplegia, Crossed	1/6	0.0160929	0.354621	0	0	61.7284	254.9	ATP1A3
Fibrous histiocytoma of tendon sheath	1/6	0.0160929	0.355418	0	0	61.7284	254.9	NTRK1
Renal cancer metastatic	1/6	0.0160929	0.356219	0	0	61.7284	254.9	HRAS
Episodic hypokalemia	1/6	0.0160929	0.357023	0	0	61.7284	254.9	GABRA3
Episodic flaccid weakness	1/6	0.0160929	0.357831	0	0	61.7284	254.9	GABRA3
Primary malignant neoplasm of lung	12/2268	0.0161255	0.326094	0	0	1.95963	8.08809	CX3CR1;NTRK1;MBD3;GPX1;LRP1;DPYSL2;ACTN4;DRD2;HRAS;MET;MAPK3;SOD1
Poor school performance	7/985	0.0161878	0.326682	0	0	2.63207	10.8533	NTRK1;CHMP1A;NR2F1;ATP1A3;HRAS;AHDC1;SCN1A
Eating Disorders	2/72	0.0162097	0.326452	0	0	10.2881	42.4089	NTRK1;DRD2
Problems speaking	2/73	0.0166378	0.329669	0	0	10.1471	41.5635	SNAP25;CHMP1A
Difficulty speaking	2/73	0.0166378	0.330335	0	0	10.1471	41.5635	SNAP25;CHMP1A
Chorea	2/73	0.0166378	0.331004	0	0	10.1471	41.5635	CHMP1A;ADCY5
mixed gliomas	2/73	0.0166378	0.331675	0	0	10.1471	41.5635	NTRK1;SOD1
Bone neoplasms	2/73	0.0166378	0.33235	0	0	10.1471	41.5635	HRAS;MET
Marfan Syndrome	2/73	0.0166378	0.333027	0	0	10.1471	41.5635	LRP1;SOD1
Attention Deficit Disorder	2/73	0.0166378	0.333706	0	0	10.1471	41.5635	SNAP25;DRD2
Long QT Syndrome	2/73	0.0166378	0.334389	0	0	10.1471	41.5635	ANK2;HRAS
Hematologic Neoplasms	5/557	0.0169624	0.335425	0	0	3.32469	13.554	LRP1;DNER;TET2;CD38;SF3B1
Keratitis	2/74	0.0170707	0.336889	0	0	10.01	40.7447	NTRK1;CD38
Diabetic Nephropathy	5/561	0.0174414	0.343514	0	0	3.30098	13.3654	NTRK1;GPX1;ACTN4;MAPK3;SOD1
Systemic Scleroderma	5/562	0.0175625	0.345208	0	0	3.29511	13.3188	CX3CR1;ADORA2A;HRAS;MET;MAPK3
Thymoma	3/205	0.0179465	0.352052	0	0	5.42005	21.7906	HRAS;MET;MAPK3
Poor speech	2/76	0.0179508	0.348657	0	0	9.74659	39.1825	SNAP25;CHMP1A
Machado-Joseph Disease	2/76	0.0179508	0.349348	0	0	9.74659	39.1825	PPP1R1B;SOD1
Amphetamine Abuse	2/76	0.0179508	0.350041	0	0	9.74659	39.1825	ADORA2A;DRD2
Amphetamine-Related Disorders	2/76	0.0179508	0.350737	0	0	9.74659	39.1825	ADORA2A;DRD2
Inflammatory pain	2/76	0.0179508	0.351435	0	0	9.74659	39.1825	NTRK1;PPP1R9B
Amphetamine Addiction	2/77	0.018398	0.355936	0	0	9.62001	38.4369	ADORA2A;DRD2
Superficial ulcer	2/77	0.018398	0.356638	0	0	9.62001	38.4369	TET2;SF3B1
Visual seizure	3/207	0.0184102	0.355473	0	0	5.36769	21.4431	MBD3;ADORA2A;DRD2
Addictive Behavior	3/208	0.0186446	0.359293	0	0	5.34188	21.2724	DRD2;MET;MAPK3
Rasmussen Syndrome	1/7	0.0187502	0.343161	0	0	52.9101	210.399	SCN1A
Rasmussen subacute encephalitis	1/7	0.0187502	0.343801	0	0	52.9101	210.399	SCN1A
Pure Autonomic Failure	1/7	0.0187502	0.344444	0	0	52.9101	210.399	SOD1
Pontocerebellar Hypoplasia Type 1	1/7	0.0187502	0.345089	0	0	52.9101	210.399	CHMP1A
Congenital melanocytic nevus	1/7	0.0187502	0.345736	0	0	52.9101	210.399	MET
Opioid withdrawal	1/7	0.0187502	0.346386	0	0	52.9101	210.399	MAPK3
NOONAN SYNDROME 3	1/7	0.0187502	0.347038	0	0	52.9101	210.399	HRAS
Carcinoma of unknown primary	1/7	0.0187502	0.347693	0	0	52.9101	210.399	MET
Multiple fibrofolliculomas	1/7	0.0187502	0.34835	0	0	52.9101	210.399	MET
Atypical absence seizure	1/7	0.0187502	0.34901	0	0	52.9101	210.399	SCN1A
Anterior Horn Cell Disease	1/7	0.0187502	0.349672	0	0	52.9101	210.399	SOD1
Keratosis pilaris	1/7	0.0187502	0.350337	0	0	52.9101	210.399	LRP1
Intracortical osteosarcoma	1/7	0.0187502	0.351005	0	0	52.9101	210.399	MAPK3
Intermittent Explosive Disorder	1/7	0.0187502	0.351674	0	0	52.9101	210.399	DRD2
Increased megakaryocyte count	1/7	0.0187502	0.352347	0	0	52.9101	210.399	TET2
Absence of pain sensation	1/7	0.0187502	0.353022	0	0	52.9101	210.399	NTRK1
Toxic multinodular goiter	1/7	0.0187502	0.353699	0	0	52.9101	210.399	GABRA3
Subacute Bacterial Endocarditis	1/7	0.0187502	0.35438	0	0	52.9101	210.399	SCN1A
Hemolysis (disorder)	1/7	0.0187502	0.355062	0	0	52.9101	210.399	SOD1
Hypomagnesemia 1, Intestinal	1/7	0.0187502	0.355748	0	0	52.9101	210.399	ACTN4
Scrapie	1/7	0.0187502	0.356436	0	0	52.9101	210.399	SOD1
Fatigability	1/7	0.0187502	0.357127	0	0	52.9101	210.399	SOD1
Familial Motor Neuron Disease	1/7	0.0187502	0.35782	0	0	52.9101	210.399	SOD1
Extravascular Hemolysis	1/7	0.0187502	0.358516	0	0	52.9101	210.399	SOD1
Ethylmalonic aciduria	1/7	0.0187502	0.359215	0	0	52.9101	210.399	ETFB
Epileptic Syndromes	1/7	0.0187502	0.359917	0	0	52.9101	210.399	SCN1A
Adenocarcinoma, Scirrhous	1/7	0.0187502	0.360621	0	0	52.9101	210.399	MET
Peripheral Vascular Diseases	2/78	0.0188499	0.344343	0	0	9.49668	37.7137	CX3CR1;GPX1
Myxoid cyst	3/209	0.0188807	0.344266	0	0	5.31632	21.1038	NTRK1;DRD2;SOD1
Diffuse Large B-Cell Lymphoma	5/575	0.0191888	0.349236	0	0	3.22061	12.7325	GPX1;DNER;TET2;CD38;MET
Chronic Kidney Diseases	4/380	0.0192435	0.349584	0	0	3.89864	15.4019	CX3CR1;GPX1;DRD2;SOD1
Gliosis	2/79	0.0193064	0.35008	0	0	9.37647	37.0119	ETFB;MAPK3
Prion Diseases	2/80	0.0197676	0.357125	0	0	9.25926	36.3306	CX3CR1;SOD1
Dementia, Vascular	2/80	0.0197676	0.357783	0	0	9.25926	36.3306	GPX1;ADORA2A
Big calvaria	3/213	0.0198416	0.357148	0	0	5.21648	20.4485	ETFB;HRAS;SYN1
Increased size of skull	3/213	0.0198416	0.357803	0	0	5.21648	20.4485	ETFB;HRAS;SYN1
Blast Phase	3/214	0.020086	0.360886	0	0	5.19211	20.2894	TET2;HRAS;SF3B1
Increased head circumference	3/215	0.020332	0.364641	0	0	5.16796	20.1321	ETFB;HRAS;SYN1
Chronic kidney disease stage 5	4/388	0.0205967	0.368715	0	0	3.81825	14.8248	CX3CR1;GPX1;ACTN4;MET
Malignant neoplasm of tongue	2/82	0.0207038	0.369287	0	0	9.03342	35.0265	ACTN4;HRAS
Osteoporosis, Age-Related	2/82	0.0207038	0.369959	0	0	9.03342	35.0265	GPX1;ADCY5
synovial sarcoma	3/217	0.0208291	0.370849	0	0	5.12033	19.8228	CD38;MET;MAPK3
Drug toxicity	2/83	0.0211788	0.375714	0	0	8.92459	34.4021	ADORA2A;SOD1
Adverse reaction to drug	2/83	0.0211788	0.376393	0	0	8.92459	34.4021	ADORA2A;SOD1
Medulloblastoma	5/590	0.0211859	0.375163	0	0	3.13873	12.098	NTRK1;SNAP25;DNER;MET;MAPK3
Early Awakening	1/8	0.0214005	0.352893	0	0	46.2963	177.979	ADORA2A
Disruptive Behavior Disorder	1/8	0.0214005	0.353486	0	0	46.2963	177.979	DRD2
Primary Insomnia	1/8	0.0214005	0.354082	0	0	46.2963	177.979	ADORA2A
Postoperative Nausea and Vomiting	1/8	0.0214005	0.354679	0	0	46.2963	177.979	DRD2
Phencyclidine Abuse	1/8	0.0214005	0.355278	0	0	46.2963	177.979	CAMK2B
Phencyclidine-Related Disorders	1/8	0.0214005	0.355879	0	0	46.2963	177.979	CAMK2B
Cranial asymmetry	1/8	0.0214005	0.356482	0	0	46.2963	177.979	HRAS
Penile Neoplasms	1/8	0.0214005	0.357087	0	0	46.2963	177.979	HRAS
Collapsing glomerulopathy	1/8	0.0214005	0.357695	0	0	46.2963	177.979	ACTN4
Neuroleptic-Induced Tardive Dyskinesia	1/8	0.0214005	0.358304	0	0	46.2963	177.979	GABRB2
Neonatal infection	1/8	0.0214005	0.358915	0	0	46.2963	177.979	ATP1A3
Motor disturbances	1/8	0.0214005	0.359529	0	0	46.2963	177.979	SOD1
Morvan's Disease	1/8	0.0214005	0.360145	0	0	46.2963	177.979	NTRK1
Morphine Abuse	1/8	0.0214005	0.360762	0	0	46.2963	177.979	GRIN2A
Mitochondrial pathology	1/8	0.0214005	0.361382	0	0	46.2963	177.979	SOD1
Metastases to adrenals	1/8	0.0214005	0.362004	0	0	46.2963	177.979	CX3CR1
manic symptom	1/8	0.0214005	0.362628	0	0	46.2963	177.979	DRD2
Leukocytoclastic vasculitis	1/8	0.0214005	0.363255	0	0	46.2963	177.979	CX3CR1
Angiosarcoma of liver	1/8	0.0214005	0.363883	0	0	46.2963	177.979	HRAS
Alternating hemiplegia of childhood	1/8	0.0214005	0.364514	0	0	46.2963	177.979	ATP1A3
Alexithymia	1/8	0.0214005	0.365147	0	0	46.2963	177.979	DRD2
Young adult onset	1/8	0.0214005	0.365782	0	0	46.2963	177.979	ATP1A3
Weakness	1/8	0.0214005	0.366419	0	0	46.2963	177.979	ATP1A3
Acute encephalopathy	1/8	0.0214005	0.367058	0	0	46.2963	177.979	SCN1A
Acute blood cancer	1/8	0.0214005	0.3677	0	0	46.2963	177.979	TET2
Urinary Retention	1/8	0.0214005	0.368344	0	0	46.2963	177.979	GABRA3
Hypocalciuric hypercalcemia	1/8	0.0214005	0.36899	0	0	46.2963	177.979	AP2S1
Seizure, Febrile, Simple	1/8	0.0214005	0.369639	0	0	46.2963	177.979	SCN1A
Hereditary Renal Cell Carcinoma	1/8	0.0214005	0.370289	0	0	46.2963	177.979	MET
Neuropathy, Hereditary Sensory And Autonomic, Type IIA	1/8	0.0214005	0.370943	0	0	46.2963	177.979	NTRK1
NEPHROTIC SYNDROME, STEROID-RESISTANT, AUTOSOMAL RECESSIVE	1/8	0.0214005	0.371598	0	0	46.2963	177.979	ACTN4
Spinal Cord Ischemia	1/8	0.0214005	0.372256	0	0	46.2963	177.979	SOD1
Motor Neuron Disease, Upper	1/8	0.0214005	0.372916	0	0	46.2963	177.979	SOD1
MIGRAINE, FAMILIAL HEMIPLEGIC, 2	1/8	0.0214005	0.373578	0	0	46.2963	177.979	ATP1A3
Lactose Intolerance, Adult Type	1/8	0.0214005	0.374243	0	0	46.2963	177.979	MCM6
Familial migraine	1/8	0.0214005	0.37491	0	0	46.2963	177.979	SCN1A
Familial hyperparathyroidism	1/8	0.0214005	0.375579	0	0	46.2963	177.979	AP2S1
Ritual compulsion	1/8	0.0214005	0.376251	0	0	46.2963	177.979	DRD2
Expressive language delay	1/8	0.0214005	0.376925	0	0	46.2963	177.979	AHDC1
Amyloidosis, Primary Cutaneous	1/8	0.0214005	0.377602	0	0	46.2963	177.979	NTRK1
Amyloidosis, familial visceral	1/8	0.0214005	0.378281	0	0	46.2963	177.979	CD38
Hodgkin Disease	5/592	0.0214621	0.353316	0	0	3.12813	12.0166	SNAP25;TET2;MET;SF3B1;MAPK3
Mitochondrial Myopathies	2/84	0.0216583	0.355356	0	0	8.81834	33.7951	MET;SOD1
Skin Ulcer	2/84	0.0216583	0.35595	0	0	8.81834	33.7951	NTRK1;MET
Heart failure	6/815	0.0220404	0.361022	0	0	2.72665	10.4018	CX3CR1;ADORA2A;DNER;ATP1A3;ANK2;SOD1
Microphthalmos	3/222	0.0221012	0.361416	0	0	5.00501	19.0797	CD38;HRAS;MET
Lesion of brain	2/85	0.0221423	0.361487	0	0	8.7146	33.2049	CX3CR1;SOD1
Rhabdomyosarcoma	4/397	0.022188	0.361632	0	0	3.73169	14.211	NTRK1;HRAS;MET;MAPK3
Prostatic Neoplasms	9/1554	0.0223125	0.363059	0	0	2.145	8.1566	CX3CR1;NTRK1;GPX1;TET2;HRAS;MET;SF3B1;MAPK3;SOD1
Severe mental retardation (I.Q. 20-34)	3/224	0.0226218	0.367482	0	0	4.96032	18.7939	NRXN1;CD38;SCN1A
Diabetic Neuropathies	2/86	0.0226308	0.366418	0	0	8.61326	32.6308	NTRK1;GPX1
Muscle Cramp	2/86	0.0226308	0.367023	0	0	8.61326	32.6308	GABRA3;SOD1
Lipoma	2/87	0.0231238	0.372559	0	0	8.51426	32.0723	AP2S1;CD38
Actinic keratosis	2/87	0.0231238	0.37317	0	0	8.51426	32.0723	HRAS;MAPK3
Hemangiosarcoma	2/87	0.0231238	0.373784	0	0	8.51426	32.0723	HRAS;MET
Alcohol Use Disorder	2/88	0.0236212	0.379329	0	0	8.41751	31.5287	CD38;DRD2
Myoclonic Epilepsies, Progressive	2/88	0.0236212	0.379949	0	0	8.41751	31.5287	SNAP25;SCN1A
Drug abuse	3/229	0.0239524	0.38402	0	0	4.85201	18.1062	CADPS2;PPP1R1B;DRD2
psychosocial stressor	1/9	0.0240438	0.361319	0	0	41.1523	153.411	DRD2
Pschomotor retardation	1/9	0.0240438	0.361872	0	0	41.1523	153.411	SCN1A
Dyggve-Melchior-Clausen syndrome	1/9	0.0240438	0.362427	0	0	41.1523	153.411	LRP1
Post-Traumatic Myelopathy	1/9	0.0240438	0.362984	0	0	41.1523	153.411	SOD1
Degeneration of the lateral corticospinal tracts	1/9	0.0240438	0.363542	0	0	41.1523	153.411	SOD1
Cystadenofibroma	1/9	0.0240438	0.364102	0	0	41.1523	153.411	MET
Periodic hypokalemic paresis	1/9	0.0240438	0.364664	0	0	41.1523	153.411	GABRA3
Oropharyngeal Neoplasms	1/9	0.0240438	0.365228	0	0	41.1523	153.411	MET
Obtundation status	1/9	0.0240438	0.365793	0	0	41.1523	153.411	SCN1A
Neuroleptic Malignant Syndrome	1/9	0.0240438	0.36636	0	0	41.1523	153.411	DRD2
Myocardial hypoxia	1/9	0.0240438	0.366929	0	0	41.1523	153.411	SF3B1
Carcinoma in situ of prostate	1/9	0.0240438	0.3675	0	0	41.1523	153.411	LRP1
Bone Sarcoma	1/9	0.0240438	0.368072	0	0	41.1523	153.411	HRAS
Metaplastic breast carcinoma	1/9	0.0240438	0.368647	0	0	41.1523	153.411	MET
Benign Infantile Myoclonic Epilepsy	1/9	0.0240438	0.369223	0	0	41.1523	153.411	SCN1A
Benign Hereditary Chorea	1/9	0.0240438	0.3698	0	0	41.1523	153.411	ADCY5
Idiopathic Myoclonic Epilepsy	1/9	0.0240438	0.37038	0	0	41.1523	153.411	SCN1A
Abnormality of earlobe	1/9	0.0240438	0.370961	0	0	41.1523	153.411	ATP1A3
Hyperventilation	1/9	0.0240438	0.371545	0	0	41.1523	153.411	NRXN1
Thyroid cancer, follicular	1/9	0.0240438	0.37213	0	0	41.1523	153.411	HRAS
Seizure, Febrile, Complex	1/9	0.0240438	0.372717	0	0	41.1523	153.411	SCN1A
Retinoschisis, Juvenile, X-Linked	1/9	0.0240438	0.373306	0	0	41.1523	153.411	ATP1A3
Symptomatic Myoclonic Epilepsy	1/9	0.0240438	0.373896	0	0	41.1523	153.411	SCN1A
Polyposis, Gastric	1/9	0.0240438	0.374489	0	0	41.1523	153.411	SOD1
Hepatopulmonary Syndrome	1/9	0.0240438	0.375083	0	0	41.1523	153.411	CX3CR1
Spinal Cord transection injury	1/9	0.0240438	0.37568	0	0	41.1523	153.411	SOD1
Spinal Cord Laceration	1/9	0.0240438	0.376278	0	0	41.1523	153.411	SOD1
Spinal Cord Injuries	1/9	0.0240438	0.376878	0	0	41.1523	153.411	SOD1
Spinal Cord Contusion	1/9	0.0240438	0.37748	0	0	41.1523	153.411	SOD1
Somatic mosaicism	1/9	0.0240438	0.378084	0	0	41.1523	153.411	HRAS
Glycogen Storage Disease Type VI	1/9	0.0240438	0.37869	0	0	41.1523	153.411	TET2
Snoring	1/9	0.0240438	0.379298	0	0	41.1523	153.411	AHDC1
Gluten sensitivity	1/9	0.0240438	0.379907	0	0	41.1523	153.411	SOD1
Glutaric aciduria	1/9	0.0240438	0.380519	0	0	41.1523	153.411	ETFB
Hereditary Sensory Autonomic Neuropathy, Type 5	1/9	0.0240438	0.381133	0	0	41.1523	153.411	NTRK1
Hereditary Sensory Autonomic Neuropathy, Type 2	1/9	0.0240438	0.381749	0	0	41.1523	153.411	NTRK1
Gait, Scissors	1/9	0.0240438	0.382366	0	0	41.1523	153.411	SOD1
Early Childhood Epilepsy, Myoclonic	1/9	0.0240438	0.382986	0	0	41.1523	153.411	SCN1A
Rumination Disorders	1/9	0.0240438	0.383608	0	0	41.1523	153.411	DRD2
eyelids (symptom)	1/9	0.0240438	0.384232	0	0	41.1523	153.411	NTRK1
Amyotrophy, monomelic	1/9	0.0240438	0.384857	0	0	41.1523	153.411	SOD1
Osteoarthrosis Deformans	2/89	0.024123	0.361404	0	0	8.32293	30.9995	DPYSL2;ATP1A3
Retinal Degeneration	2/89	0.024123	0.361955	0	0	8.32293	30.9995	CX3CR1;SOD1
Malignant neoplasm of pancreas	10/1846	0.0244258	0.365383	0	0	2.00634	7.44777	CX3CR1;NTRK1;LRP1;DNER;GABRA3;ACTN4;HRAS;MET;MAPK3;SOD1
Colorectal Neoplasms	7/1073	0.0246186	0.367707	0	0	2.41621	8.95026	CX3CR1;GRIN2A;LRP1;DPYSL2;HRAS;MET;MAPK3
Acute Cerebrovascular Accidents	2/91	0.0251397	0.374921	0	0	8.14001	29.9822	ANK2;SOD1
Adrenal Cortical Adenoma	2/92	0.0256545	0.382019	0	0	8.05153	29.493	NR2F1;HRAS
Uveal melanoma	3/236	0.0258855	0.384876	0	0	4.7081	17.2037	MET;SF3B1;MAPK3
Edema	2/93	0.0261737	0.387402	0	0	7.96495	29.0163	ACTN4;SOD1
Manic	2/93	0.0261737	0.387986	0	0	7.96495	29.0163	NTRK1;SNAP25
PARKINSON DISEASE, LATE-ONSET	2/93	0.0261737	0.388572	0	0	7.96495	29.0163	DRD2;MAPK3
Arteriosclerosis	7/1087	0.0261967	0.38716	0	0	2.38509	8.68679	CX3CR1;GPX1;LRP1;DNER;TET2;MAPK3;SOD1
Pancreatic carcinoma	10/1869	0.0263602	0.388991	0	0	1.98165	7.20508	CX3CR1;NTRK1;SNAP25;DNER;GABRA3;ACTN4;HRAS;MET;MAPK3;SOD1
Emotional Stress	1/10	0.0266801	0.359687	0	0	37.037	134.216	DRD2
Early-Onset Glaucoma	1/10	0.0266801	0.360181	0	0	37.037	134.216	SBF1
Proximal tubulopathy	1/10	0.0266801	0.360676	0	0	37.037	134.216	ETFB
Primary bacterial peritonitis	1/10	0.0266801	0.361173	0	0	37.037	134.216	SOD1
Delinquent behavior	1/10	0.0266801	0.361671	0	0	37.037	134.216	DRD2
Deep plantar creases	1/10	0.0266801	0.362171	0	0	37.037	134.216	HRAS
Darkness Tremor	1/10	0.0266801	0.362672	0	0	37.037	134.216	ADORA2A
Pill Rolling Tremor	1/10	0.0266801	0.363174	0	0	37.037	134.216	ADORA2A
Phototoxicity	1/10	0.0266801	0.363678	0	0	37.037	134.216	SNAP25
Persistent Tremor	1/10	0.0266801	0.364183	0	0	37.037	134.216	ADORA2A
cortex bone disorders	1/10	0.0266801	0.364689	0	0	37.037	134.216	DRD2
Continuous Tremor	1/10	0.0266801	0.365197	0	0	37.037	134.216	ADORA2A
Constitutional delay of growth and puberty	1/10	0.0266801	0.365707	0	0	37.037	134.216	SOD1
Passive Tremor	1/10	0.0266801	0.366217	0	0	37.037	134.216	ADORA2A
Coarse Tremor	1/10	0.0266801	0.366729	0	0	37.037	134.216	ADORA2A
Chronic idiopathic neutropenia	1/10	0.0266801	0.367243	0	0	37.037	134.216	TET2
Nerve Tremors	1/10	0.0266801	0.367758	0	0	37.037	134.216	ADORA2A
Cervical Migraine Syndrome	1/10	0.0266801	0.368275	0	0	37.037	134.216	LRP1
cervical cancer metastasis	1/10	0.0266801	0.368793	0	0	37.037	134.216	MAPK3
Myoclonic Absence Epilepsy	1/10	0.0266801	0.369312	0	0	37.037	134.216	SCN1A
Motor Disorders	1/10	0.0266801	0.369833	0	0	37.037	134.216	ATP1A3
Bronchomalacia	1/10	0.0266801	0.370355	0	0	37.037	134.216	HRAS
Bisphosphonate-associated osteonecrosis	1/10	0.0266801	0.370879	0	0	37.037	134.216	MAPK3
Melanosis coli	1/10	0.0266801	0.371405	0	0	37.037	134.216	MET
Melanosis	1/10	0.0266801	0.371931	0	0	37.037	134.216	MET
Massive Tremor	1/10	0.0266801	0.37246	0	0	37.037	134.216	ADORA2A
Malignant melanoma of iris	1/10	0.0266801	0.372989	0	0	37.037	134.216	SF3B1
Liver Dysplastic Nodule	1/10	0.0266801	0.373521	0	0	37.037	134.216	ACTN4
Lennox-Gastaut syndrome	1/10	0.0266801	0.374054	0	0	37.037	134.216	SCN1A
Koilonychia	1/10	0.0266801	0.374588	0	0	37.037	134.216	HRAS
Involuntary Quiver	1/10	0.0266801	0.375124	0	0	37.037	134.216	ADORA2A
Intermittent Tremor	1/10	0.0266801	0.375661	0	0	37.037	134.216	ADORA2A
Acute otitis media	1/10	0.0266801	0.3762	0	0	37.037	134.216	CX3CR1
WAGR Syndrome	1/10	0.0266801	0.376741	0	0	37.037	134.216	HRAS
Acute Confusional Migraine	1/10	0.0266801	0.377283	0	0	37.037	134.216	LRP1
Induced hypothermia (finding)	1/10	0.0266801	0.377826	0	0	37.037	134.216	MAPK3
Ventricular Dysfunction	1/10	0.0266801	0.378372	0	0	37.037	134.216	ADORA2A
Abdominal Migraine	1/10	0.0266801	0.378918	0	0	37.037	134.216	LRP1
Vasculitis, Leukocytoclastic, Cutaneous	1/10	0.0266801	0.379467	0	0	37.037	134.216	CX3CR1
Tremor, Semirhythmic	1/10	0.0266801	0.380017	0	0	37.037	134.216	ADORA2A
Tremor, Perioral	1/10	0.0266801	0.380568	0	0	37.037	134.216	ADORA2A
Tremor, Neonatal	1/10	0.0266801	0.381121	0	0	37.037	134.216	ADORA2A
Tremor, Muscle	1/10	0.0266801	0.381676	0	0	37.037	134.216	ADORA2A
Heroin Smoking	1/10	0.0266801	0.382233	0	0	37.037	134.216	DRD2
Subacute progressive viral hepatitis	1/10	0.0266801	0.382791	0	0	37.037	134.216	MET
Status Migrainosus	1/10	0.0266801	0.38335	0	0	37.037	134.216	LRP1
Hemicrania migraine	1/10	0.0266801	0.383912	0	0	37.037	134.216	LRP1
Lipomatosis, Multiple Symmetrical	1/10	0.0266801	0.384474	0	0	37.037	134.216	MAPK3
Generalized aminoaciduria	1/10	0.0266801	0.385039	0	0	37.037	134.216	ETFB
Sick Headaches	1/10	0.0266801	0.385605	0	0	37.037	134.216	LRP1
Hypocalciuric hypercalcemia, familial, type 1	1/10	0.0266801	0.386173	0	0	37.037	134.216	AP2S1
Hyperbilirubinemia, Neonatal	1/10	0.0266801	0.386743	0	0	37.037	134.216	GPX1
Hemiplegic migraine, familial type 1	1/10	0.0266801	0.387314	0	0	37.037	134.216	SCN1A
Senile Tremor	1/10	0.0266801	0.387887	0	0	37.037	134.216	ADORA2A
Fine Tremor	1/10	0.0266801	0.388462	0	0	37.037	134.216	ADORA2A
Saturnine Tremor	1/10	0.0266801	0.389038	0	0	37.037	134.216	ADORA2A
CEROID LIPOFUSCINOSIS, NEURONAL, 6	1/10	0.0266801	0.389616	0	0	37.037	134.216	MAPK3
Retinal Vasculitis	1/10	0.0266801	0.390196	0	0	37.037	134.216	CX3CR1
Retinal Drusen	1/10	0.0266801	0.390777	0	0	37.037	134.216	CX3CR1
Exercise-induced muscle fatigue	1/10	0.0266801	0.391361	0	0	37.037	134.216	GABRA3
Apraxia, Verbal	1/10	0.0266801	0.391946	0	0	37.037	134.216	GRIN2A
Epithelioid and spindle cell nevus	1/10	0.0266801	0.392532	0	0	37.037	134.216	HRAS
Refractory anemia with ring sideroblasts associated with marked thrombocytosis	1/10	0.0266801	0.393121	0	0	37.037	134.216	SF3B1
AMYOTROPHIC LATERAL SCLEROSIS 1	2/94	0.0266971	0.359423	0	0	7.88022	28.5516	GPX1;SOD1
Medullary carcinoma of thyroid	3/239	0.0267391	0.359496	0	0	4.649	16.837	NTRK1;HRAS;MET
Membranous glomerulonephritis	2/95	0.0272247	0.36453	0	0	7.79727	28.0985	ACTN4;HRAS
Gastric ulcer	2/95	0.0272247	0.365027	0	0	7.79727	28.0985	MET;SOD1
Sciatic Neuropathy	2/95	0.0272247	0.365526	0	0	7.79727	28.0985	CX3CR1;SOD1
Conventional (Clear Cell) Renal Cell Carcinoma	5/631	0.0273281	0.365415	0	0	2.93479	10.5648	INTS1;TET2;CD38;MET;MAPK3
Telecanthus	2/96	0.0277566	0.370139	0	0	7.71605	27.6565	ETFB;HRAS
Retinal Detachment	2/96	0.0277566	0.370641	0	0	7.71605	27.6565	NTRK1;SF3B1
Malignant neoplasm of lung	12/2449	0.0278769	0.371238	0	0	1.8148	6.49691	CX3CR1;NTRK1;MBD3;GPX1;LRP1;DPYSL2;ACTN4;DRD2;HRAS;MET;MAPK3;SOD1
Vitiligo	3/243	0.0279006	0.371051	0	0	4.57247	16.3654	MBD3;MAPK3;SOD1
Ovarian Serous Adenocarcinoma	2/97	0.0282927	0.375758	0	0	7.6365	27.2253	NTRK1;SCN1A
Cervix carcinoma	7/1105	0.028327	0.375705	0	0	2.34624	8.36185	TET2;SBF1;HRAS;MET;SCN1A;MAPK3;SOD1
Myelofibrosis	2/98	0.0288329	0.381386	0	0	7.55858	26.8045	TET2;SF3B1
Frontotemporal Lobar Degeneration	2/98	0.0288329	0.3819	0	0	7.55858	26.8045	SNAP25;SOD1
Immunologic Deficiency Syndromes	5/641	0.0289825	0.38285	0	0	2.889	10.2301	CD38;APBB1;HRAS;MET;SOD1
Diabetic Retinopathy	3/247	0.0290887	0.383737	0	0	4.49843	15.9128	HRAS;MAPK3;SOD1
Cirrhosis	4/433	0.0292975	0.385973	0	0	3.42144	12.0785	GRIN2A;GPX1;MET;ADCY5
Posterior Circulation Transient Ischemic Attack	1/11	0.0293093	0.36233	0	0	33.67	118.85	SOD1
Degeneration of anterior horn cells	1/11	0.0293093	0.362786	0	0	33.67	118.85	SOD1
Plasma cell inflammation	1/11	0.0293093	0.363243	0	0	33.67	118.85	CD38
Pityriasis Rubra Pilaris	1/11	0.0293093	0.363702	0	0	33.67	118.85	MAPK3
Pigmented villonodular synovitis	1/11	0.0293093	0.364162	0	0	33.67	118.85	NTRK1
Crescendo Transient Ischemic Attacks	1/11	0.0293093	0.364623	0	0	33.67	118.85	SOD1
Congenital Pain Insensitivity	1/11	0.0293093	0.365085	0	0	33.67	118.85	NTRK1
Osteochondritis Dissecans	1/11	0.0293093	0.365548	0	0	33.67	118.85	DLGAP3
Neurodevelopmental delay	1/11	0.0293093	0.366013	0	0	33.67	118.85	SCN1A
Nasopharyngeal Angiofibroma	1/11	0.0293093	0.366478	0	0	33.67	118.85	HRAS
Myokymia	1/11	0.0293093	0.366945	0	0	33.67	118.85	ADCY5
Myoclonic Encephalopathy	1/11	0.0293093	0.367413	0	0	33.67	118.85	SCN1A
Carotid Circulation Transient Ischemic Attack	1/11	0.0293093	0.367883	0	0	33.67	118.85	SOD1
Multiple Endocrine Neoplasia Type 2b	1/11	0.0293093	0.368353	0	0	33.67	118.85	NTRK1
Cannabis-Related Disorder	1/11	0.0293093	0.368825	0	0	33.67	118.85	CAMK2B
Malignant neoplasm of tail of pancreas	1/11	0.0293093	0.369297	0	0	33.67	118.85	MET
Malignant neoplasm of other specified sites of pancreas	1/11	0.0293093	0.369772	0	0	33.67	118.85	MET
malignant neoplasm of head of pancreas	1/11	0.0293093	0.370247	0	0	33.67	118.85	MET
Malignant neoplasm of body of pancreas	1/11	0.0293093	0.370723	0	0	33.67	118.85	MET
Arterial thrombosis	1/11	0.0293093	0.371201	0	0	33.67	118.85	TET2
Apraxia of Phonation	1/11	0.0293093	0.37168	0	0	33.67	118.85	GRIN2A
Limited elbow movement	1/11	0.0293093	0.37216	0	0	33.67	118.85	HRAS
Analgesic Overuse Headache	1/11	0.0293093	0.372642	0	0	33.67	118.85	DRD2
LACTASE PERSISTENCE	1/11	0.0293093	0.373124	0	0	33.67	118.85	MCM6
Akathisia	1/11	0.0293093	0.373608	0	0	33.67	118.85	DRD2
Immunoglobulin G4 related sclerosing disease	1/11	0.0293093	0.374094	0	0	33.67	118.85	CD38
Hypotrichosis of the scalp	1/11	0.0293093	0.37458	0	0	33.67	118.85	NTRK1
Hypothalamic hamartomas	1/11	0.0293093	0.375068	0	0	33.67	118.85	MAPK3
Abnormality of brainstem morphology	1/11	0.0293093	0.375557	0	0	33.67	118.85	SCN1A
Abnormal platelet morphology	1/11	0.0293093	0.376047	0	0	33.67	118.85	TET2
Hypocalciuria	1/11	0.0293093	0.376539	0	0	33.67	118.85	AP2S1
Transient Ischemic Attack, Vertebrobasilar Circulation	1/11	0.0293093	0.377031	0	0	33.67	118.85	SOD1
Transient Ischemic Attack, Anterior Circulation	1/11	0.0293093	0.377526	0	0	33.67	118.85	SOD1
Thin nails	1/11	0.0293093	0.378021	0	0	33.67	118.85	HRAS
Synovial sarcoma, biphasic	1/11	0.0293093	0.378518	0	0	33.67	118.85	CD38
HSAN Type IV	1/11	0.0293093	0.379016	0	0	33.67	118.85	NTRK1
Sensory Neuropathy, Hereditary	1/11	0.0293093	0.379515	0	0	33.67	118.85	NTRK1
Nevus, Blue	1/11	0.0293093	0.380016	0	0	33.67	118.85	HRAS
Hashish Abuse	1/11	0.0293093	0.380518	0	0	33.67	118.85	CAMK2B
Spermatocytic seminoma	1/11	0.0293093	0.381021	0	0	33.67	118.85	HRAS
Genitourinary dysplasia	1/11	0.0293093	0.381526	0	0	33.67	118.85	HRAS
Gastrooesophageal cancer	1/11	0.0293093	0.382032	0	0	33.67	118.85	MET
Sexual Dysfunction	1/11	0.0293093	0.382539	0	0	33.67	118.85	DRD2
Gait, Shuffling	1/11	0.0293093	0.383048	0	0	33.67	118.85	SOD1
Focal Clonic Seizures	1/11	0.0293093	0.383558	0	0	33.67	118.85	SCN1A
Rudiger syndrome 1	1/11	0.0293093	0.384069	0	0	33.67	118.85	LRP1
Brain Stem Ischemia, Transient	1/11	0.0293093	0.384582	0	0	33.67	118.85	SOD1
Refractory Cytopenia of Childhood	1/11	0.0293093	0.385096	0	0	33.67	118.85	TET2
Redundant neck skin	1/11	0.0293093	0.385612	0	0	33.67	118.85	HRAS
Malformations of Cortical Development	2/99	0.0293773	0.362714	0	0	7.48223	26.3938	HRAS;SCN1A
Meningioma	4/438	0.0303806	0.374631	0	0	3.38238	11.8179	GPX1;MCM6;HRAS;MAPK3
Olfactory seizure	2/101	0.0304784	0.368894	0	0	7.33407	25.6013	ADORA2A;DRD2
Nonepileptic Seizures	2/101	0.0304784	0.369349	0	0	7.33407	25.6013	ADORA2A;DRD2
Non-epileptic convulsion	2/101	0.0304784	0.369805	0	0	7.33407	25.6013	ADORA2A;DRD2
Atonic Absence Seizures	2/101	0.0304784	0.370262	0	0	7.33407	25.6013	ADORA2A;DRD2
Jacksonian Seizure	2/101	0.0304784	0.37072	0	0	7.33407	25.6013	ADORA2A;DRD2
Xeroderma Pigmentosum	2/101	0.0304784	0.37118	0	0	7.33407	25.6013	HRAS;MET
Vertiginous seizure	2/101	0.0304784	0.37164	0	0	7.33407	25.6013	ADORA2A;DRD2
Seizures, Somatosensory	2/101	0.0304784	0.372102	0	0	7.33407	25.6013	ADORA2A;DRD2
Seizures, Sensory	2/101	0.0304784	0.372565	0	0	7.33407	25.6013	ADORA2A;DRD2
Seizures, Clonic	2/101	0.0304784	0.373029	0	0	7.33407	25.6013	ADORA2A;DRD2
Seizures, Auditory	2/101	0.0304784	0.373494	0	0	7.33407	25.6013	ADORA2A;DRD2
Hemangioma	2/101	0.0304784	0.37396	0	0	7.33407	25.6013	NTRK1;HRAS
Gustatory seizure	2/101	0.0304784	0.374428	0	0	7.33407	25.6013	ADORA2A;DRD2
Single Seizure	2/101	0.0304784	0.374896	0	0	7.33407	25.6013	ADORA2A;DRD2
Generalized Absence Seizures	2/101	0.0304784	0.375366	0	0	7.33407	25.6013	ADORA2A;DRD2
Childhood Acute Myeloid Leukemia	2/102	0.0310351	0.374249	0	0	7.26216	25.2189	TET2;CD38
Adult Acute Myeloblastic Leukemia	2/102	0.0310351	0.374709	0	0	7.26216	25.2189	TET2;SF3B1
Heart Decompensation	2/102	0.0310351	0.37517	0	0	7.26216	25.2189	ATP1A3;SOD1
Osteoporosis	4/441	0.0310418	0.373871	0	0	3.35937	11.6651	GPX1;LRP1;ADCY5;MAPK3
Malignant tumor of cervix	6/884	0.0312205	0.375564	0	0	2.51383	8.71463	TET2;SBF1;HRAS;MET;SCN1A;MAPK3
Fatty Liver	4/443	0.0314874	0.37831	0	0	3.3442	11.5648	GPX1;MET;MAPK3;SOD1
Severe Sepsis	2/103	0.0315958	0.37915	0	0	7.19166	24.8452	ADORA2A;MAPK3
Dysplastic Nevus Syndrome	1/12	0.0319316	0.371389	0	0	30.8642	106.301	HRAS
Decreased facial muscle movement	1/12	0.0319316	0.371829	0	0	30.8642	106.301	ATP1A3
Corneal Scar	1/12	0.0319316	0.37227	0	0	30.8642	106.301	NTRK1
Congenital exomphalos	1/12	0.0319316	0.372713	0	0	30.8642	106.301	LRP1
Nicotine withdrawal	1/12	0.0319316	0.373156	0	0	30.8642	106.301	DRD2
Nevus sebaceous	1/12	0.0319316	0.3736	0	0	30.8642	106.301	HRAS
Migraine Variant	1/12	0.0319316	0.374045	0	0	30.8642	106.301	LRP1
Menstrual spotting	1/12	0.0319316	0.374492	0	0	30.8642	106.301	NTRK1
Asperger Syndrome	1/12	0.0319316	0.374939	0	0	30.8642	106.301	NRXN1
Amaurosis Fugax	1/12	0.0319316	0.375388	0	0	30.8642	106.301	TET2
Adult Brain Neoplasm	1/12	0.0319316	0.375837	0	0	30.8642	106.301	DNER
Violence	1/12	0.0319316	0.376288	0	0	30.8642	106.301	DRD2
Trichoepithelioma	1/12	0.0319316	0.376739	0	0	30.8642	106.301	HRAS
Thyrotoxic periodic paralysis	1/12	0.0319316	0.377192	0	0	30.8642	106.301	GABRA3
hyperparathyroid	1/12	0.0319316	0.377646	0	0	30.8642	106.301	AP2S1
Tay-Sachs Disease	1/12	0.0319316	0.378101	0	0	30.8642	106.301	SOD1
NEVUS, EPIDERMAL (disorder)	1/12	0.0319316	0.378557	0	0	30.8642	106.301	HRAS
Glucose tolerance test	1/12	0.0319316	0.379014	0	0	30.8642	106.301	ADCY5
Generalized tonic seizures	1/12	0.0319316	0.379473	0	0	30.8642	106.301	SCN1A
Generalized Epilepsy with Febrile Seizures Plus	1/12	0.0319316	0.379932	0	0	30.8642	106.301	SCN1A
Frontotemporal Dementia With Motor Neuron Disease	1/12	0.0319316	0.380393	0	0	30.8642	106.301	SOD1
Gambling, Pathological	1/12	0.0319316	0.380854	0	0	30.8642	106.301	DRD2
Epilepsy, Myoclonic, Infantile	1/12	0.0319316	0.381317	0	0	30.8642	106.301	SCN1A
Female Pseudo-Turner Syndrome	1/12	0.0319316	0.381781	0	0	30.8642	106.301	HRAS
Familial benign hypercalcemia	1/12	0.0319316	0.382246	0	0	30.8642	106.301	AP2S1
Episodic ataxia type 2 (disorder)	1/12	0.0319316	0.382712	0	0	30.8642	106.301	SCN1A
Atherosclerosis	7/1134	0.0320049	0.371802	0	0	2.28624	7.86892	CX3CR1;GPX1;LRP1;DNER;TET2;MAPK3;SOD1
Ischemia	2/104	0.0321605	0.372728	0	0	7.12251	24.4802	ADORA2A;SOD1
Enterovirus Infections	2/104	0.0321605	0.373169	0	0	7.12251	24.4802	MAPK3;SOD1
Urothelial Carcinoma	3/257	0.0321756	0.372464	0	0	4.32339	14.8575	SNAP25;HRAS;MET
Narcolepsy	3/258	0.0324934	0.375259	0	0	4.30663	14.7576	DPP10;GRIN2A;NRXN1
Adenoma of large intestine	3/258	0.0324934	0.3757	0	0	4.30663	14.7576	DRD2;HRAS;MET
Pick Disease of the Brain	2/105	0.0327293	0.377096	0	0	7.05467	24.1234	MAPK3;SOD1
M5b Acute differentiated monocytic leukemia	2/105	0.0327293	0.377539	0	0	7.05467	24.1234	CD38;MAPK3
Malignant Pleural Mesothelioma	3/260	0.033134	0.381312	0	0	4.2735	14.5607	DPP10;CD38;MET
Pancreatic Neoplasm	5/665	0.0332106	0.381748	0	0	2.78474	9.48172	NTRK1;CHMP1A;HRAS;MET;MAPK3
Teratocarcinoma	2/106	0.0333019	0.381904	0	0	6.98812	23.7746	DRD2;HRAS
Heart Failure, Right-Sided	2/106	0.0333019	0.38235	0	0	6.98812	23.7746	ATP1A3;SOD1
Head and Neck Neoplasms	2/107	0.0338786	0.388064	0	0	6.92281	23.4335	GPX1;MAPK3
Chronic Obstructive Airway Disease	5/669	0.0339511	0.388442	0	0	2.76809	9.36399	ADORA2A;TSHZ3;DNER;TET2;SOD1
Male infertility	3/263	0.0341073	0.389775	0	0	4.22476	14.2723	NTRK1;DMWD;SBF1
Myeloproliferative disease	3/264	0.034435	0.393063	0	0	4.20875	14.178	DNER;TET2;SF3B1
Physical aggression	2/108	0.0344591	0.391972	0	0	6.85871	23.1	SYN1;SCN1A
Congenital ocular coloboma (disorder)	2/108	0.0344591	0.392427	0	0	6.85871	23.1	SNAP25;HRAS
Myocardial Failure	2/108	0.0344591	0.392882	0	0	6.85871	23.1	ATP1A3;SOD1
Distal Spinal Muscular Atrophy	1/13	0.034547	0.381492	0	0	28.49	95.8814	MAPK3
Primary Focal Segmental Glomerulosclerosis	1/13	0.034547	0.381921	0	0	28.49	95.8814	ACTN4
Decreased facial expression	1/13	0.034547	0.382351	0	0	28.49	95.8814	ATP1A3
Opioid abuse	1/13	0.034547	0.382782	0	0	28.49	95.8814	PPP1R1B
Olfactory Neuroblastoma	1/13	0.034547	0.383214	0	0	28.49	95.8814	NTRK1
Neoplastic Processes	1/13	0.034547	0.383647	0	0	28.49	95.8814	HRAS
Myoclonic Astatic Epilepsy	1/13	0.034547	0.384081	0	0	28.49	95.8814	SCN1A
Canine Osteosarcoma	1/13	0.034547	0.384516	0	0	28.49	95.8814	MET
Multiple Acyl Coenzyme A Dehydrogenase Deficiency	1/13	0.034547	0.384952	0	0	28.49	95.8814	ETFB
Behavioral tic	1/13	0.034547	0.385389	0	0	28.49	95.8814	SNAP25
Liver and Intrahepatic Bile Duct Neoplasm	1/13	0.034547	0.385827	0	0	28.49	95.8814	MET
Liver and Intrahepatic Bile Duct Epithelial Neoplasm	1/13	0.034547	0.386266	0	0	28.49	95.8814	MET
Lenticulostriate Disorders	1/13	0.034547	0.386706	0	0	28.49	95.8814	DRD2
Acute asthma	1/13	0.034547	0.387147	0	0	28.49	95.8814	MAPK3
Hypoglycemic coma	1/13	0.034547	0.387589	0	0	28.49	95.8814	ETFB
Transformed migraine	1/13	0.034547	0.388032	0	0	28.49	95.8814	SOD1
Trigeminal Neuralgia, Idiopathic	1/13	0.034547	0.388476	0	0	28.49	95.8814	MAPK3
Tremor, Limb	1/13	0.034547	0.388921	0	0	28.49	95.8814	ADORA2A
Human Papillomavirus Positive Oropharyngeal Squamous Cell Carcinoma	1/13	0.034547	0.389367	0	0	28.49	95.8814	HRAS
Niemann-Pick Disease, Type C1	1/13	0.034547	0.389814	0	0	28.49	95.8814	SNAP25
Hypothermia, Accidental	1/13	0.034547	0.390262	0	0	28.49	95.8814	SOD1
Secondary Trigeminal Neuralgia	1/13	0.034547	0.390711	0	0	28.49	95.8814	MAPK3
Familial Epilepsies	1/13	0.034547	0.391161	0	0	28.49	95.8814	SCN1A
Expressionless face	1/13	0.034547	0.391612	0	0	28.49	95.8814	ATP1A3
Relapsing Fever	1/13	0.034547	0.392064	0	0	28.49	95.8814	NTRK1
Epithelial corneal erosions	1/13	0.034547	0.392517	0	0	28.49	95.8814	NTRK1
Acute lymphocytic leukemia	6/907	0.0347689	0.383511	0	0	2.45008	8.2299	SNAP25;LRP1;DNER;TET2;CD38;SF3B1
Muscle hypotonia	4/460	0.0354278	0.390341	0	0	3.22061	10.7577	ETFB;HRAS;AHDC1;SCN1A
Adenocarcinoma of colon	3/267	0.0354281	0.389471	0	0	4.16146	13.9003	HRAS;PPP1R9B;MAPK3
Trichohepatoenteric Syndrome	3/267	0.0354281	0.389907	0	0	4.16146	13.9003	DRD2;SCN1A;SOD1
Carcinogenesis	17/4065	0.0354701	0.389498	0	0	1.5489	5.17189	CX3CR1;NTRK1;MBD3;GPX1;LRP1;TET2;ACTN4;PPP1R9B;SOD1;DPYSL2;DNER;PPP1R1B;CD38;HRAS;MET;SF3B1;MAPK3
Borderline Personality Disorder	2/110	0.0356319	0.390837	0	0	6.73401	22.4546	GABRB2;DRD2
Myopia	3/269	0.0360983	0.395512	0	0	4.13052	13.7196	ADORA2A;LRP1;CHMP1A
Plasmacytoma	2/111	0.036224	0.396006	0	0	6.67334	22.1424	CD38;MAPK3
Multiple Endocrine Neoplasia Type 1	2/111	0.036224	0.396447	0	0	6.67334	22.1424	NTRK1;HRAS
Liver Cirrhosis	5/683	0.0366242	0.399492	0	0	2.71135	8.96656	CX3CR1;GRIN2A;GPX1;MET;SOD1
Secondary malignant neoplasm of lung	5/683	0.0366242	0.399936	0	0	2.71135	8.96656	LRP1;DNER;HRAS;MET;MAPK3
Aggressive behavior	2/112	0.03682	0.401183	0	0	6.61376	21.8367	SYN1;SCN1A
Deep palmar crease	1/14	0.0371554	0.391386	0	0	26.455	87.1071	HRAS
Phosphate Diabetes	1/14	0.0371554	0.391806	0	0	26.455	87.1071	MAPK3
Copper-Overload Cirrhosis	1/14	0.0371554	0.392227	0	0	26.455	87.1071	MET
Other specified iron deficiency anemias	1/14	0.0371554	0.392648	0	0	26.455	87.1071	GPX1
Classical Lissencephaly	1/14	0.0371554	0.393071	0	0	26.455	87.1071	CD38
Neuroma	1/14	0.0371554	0.393495	0	0	26.455	87.1071	SOD1
Neuritis	1/14	0.0371554	0.393919	0	0	26.455	87.1071	CX3CR1
Myxoma of heart	1/14	0.0371554	0.394345	0	0	26.455	87.1071	MAPK3
Cardio-facio-cutaneous syndrome	1/14	0.0371554	0.394771	0	0	26.455	87.1071	HRAS
Cancer Relapse	1/14	0.0371554	0.395198	0	0	26.455	87.1071	MET
Miller Dieker syndrome	1/14	0.0371554	0.395626	0	0	26.455	87.1071	SF3B1
Micronodular cirrhosis	1/14	0.0371554	0.396055	0	0	26.455	87.1071	MET
Limb hypertonia	1/14	0.0371554	0.396485	0	0	26.455	87.1071	ADCY5
Leiomyomatosis	1/14	0.0371554	0.396916	0	0	26.455	87.1071	MET
ALZHEIMER DISEASE 2	1/14	0.0371554	0.397348	0	0	26.455	87.1071	LRP1
Intravascular hemolysis	1/14	0.0371554	0.397781	0	0	26.455	87.1071	SOD1
Absence of sensation	1/14	0.0371554	0.398215	0	0	26.455	87.1071	CD38
Urinary tract obstruction	1/14	0.0371554	0.39865	0	0	26.455	87.1071	TSHZ3
Abnormal mental state	1/14	0.0371554	0.399085	0	0	26.455	87.1071	HRAS
Hypokalemic periodic paralysis	1/14	0.0371554	0.399522	0	0	26.455	87.1071	GABRA3
Hyperextensibility of the finger joints	1/14	0.0371554	0.39996	0	0	26.455	87.1071	HRAS
Syringomyelia	1/14	0.0371554	0.400398	0	0	26.455	87.1071	CD38
Growth Hormone-Producing Pituitary Gland Neoplasm	1/14	0.0371554	0.400838	0	0	26.455	87.1071	DRD2
Histiocytoma, Angiomatoid Fibrous	1/14	0.0371554	0.401278	0	0	26.455	87.1071	MET
Semantic Dementia	1/14	0.0371554	0.40172	0	0	26.455	87.1071	SOD1
ECTODERMAL DYSPLASIA 11A, HYPOHIDROTIC/HAIR/TOOTH TYPE, AUTOSOMAL DOMINANT	1/14	0.0371554	0.402162	0	0	26.455	87.1071	CD38
ECTODERMAL DYSPLASIA 10A, HYPOHIDROTIC/HAIR/NAIL TYPE, AUTOSOMAL DOMINANT	1/14	0.0371554	0.402605	0	0	26.455	87.1071	CD38
Dermatitis, Phototoxic	1/14	0.0371554	0.40305	0	0	26.455	87.1071	SNAP25
Falls	1/14	0.0371554	0.403495	0	0	26.455	87.1071	SCN1A
Renal cortical cysts	1/14	0.0371554	0.403941	0	0	26.455	87.1071	ETFB
Recurrent erosion of cornea	1/14	0.0371554	0.404389	0	0	26.455	87.1071	NTRK1
Septicemia	4/468	0.0373775	0.393304	0	0	3.16556	10.4042	CX3CR1;ADORA2A;SCN1A;MAPK3
Paresis	2/113	0.0374198	0.392488	0	0	6.55523	21.5376	MET;SOD1
Obesity, Morbid	2/113	0.0374198	0.392908	0	0	6.55523	21.5376	GPX1;DRD2
Adenocarcinoma, Clear Cell	2/113	0.0374198	0.393328	0	0	6.55523	21.5376	ACTN4;MET
Obsessive-Compulsive Disorder	2/114	0.0380233	0.397546	0	0	6.49773	21.2447	DLGAP3;DRD2
Urticaria	2/114	0.0380233	0.397969	0	0	6.49773	21.2447	GPX1;SOD1
Neuroectodermal Tumor, Primitive	2/114	0.0380233	0.398394	0	0	6.49773	21.2447	NTRK1;HRAS
Depressed nasal root/bridge	3/275	0.0381485	0.397586	0	0	4.0404	13.197	ETFB;HRAS;AHDC1
Concave bridge of nose	3/275	0.0381485	0.398008	0	0	4.0404	13.197	ETFB;HRAS;AHDC1
Cerebral Ischemia	3/275	0.0381485	0.398431	0	0	4.0404	13.197	GPX1;MAPK3;SOD1
Down Syndrome	4/475	0.0391337	0.407422	0	0	3.11891	10.1077	SNAP25;DPYSL2;TET2;SOD1
Prescription Drug Abuse	2/116	0.0392416	0.407251	0	0	6.3857	20.677	CADPS2;DRD2
Organic Mental Disorders, Substance-Induced	2/116	0.0392416	0.407682	0	0	6.3857	20.677	CADPS2;DRD2
Condition, Preneoplastic	2/116	0.0392416	0.408113	0	0	6.3857	20.677	DPP10;HRAS
Squamous cell carcinoma of the head and neck	6/934	0.0392593	0.407004	0	0	2.37925	7.70299	NTRK1;GPX1;ADORA2A;HRAS;MET;MAPK3
Thyroid Neoplasm	4/476	0.0393884	0.407913	0	0	3.11236	10.0662	NTRK1;LRP1;HRAS;MET
Pneumothorax	1/15	0.0397569	0.402815	0	0	24.6914	79.629	HRAS
Phobic anxiety disorder	1/15	0.0397569	0.403231	0	0	24.6914	79.629	ADORA2A
Complex partial seizure with impairment of consciousness	1/15	0.0397569	0.403647	0	0	24.6914	79.629	SCN1A
Nicotine Use Disorder	1/15	0.0397569	0.404065	0	0	24.6914	79.629	DRD2
Mucosal Melanoma	1/15	0.0397569	0.404483	0	0	24.6914	79.629	SF3B1
Budd-Chiari Syndrome	1/15	0.0397569	0.404902	0	0	24.6914	79.629	TET2
Malignant melanoma of ciliary body	1/15	0.0397569	0.405322	0	0	24.6914	79.629	SF3B1
Anovulation	1/15	0.0397569	0.405743	0	0	24.6914	79.629	DRD2
Adult Synovial Sarcoma	1/15	0.0397569	0.406165	0	0	24.6914	79.629	MET
Trisomy 21, Mitotic Nondisjunction	1/15	0.0397569	0.406587	0	0	24.6914	79.629	SOD1
Trisomy 21, Meiotic Nondisjunction	1/15	0.0397569	0.407011	0	0	24.6914	79.629	SOD1
Thanatophoric Dysplasia	1/15	0.0397569	0.407435	0	0	24.6914	79.629	HRAS
Sudden sensorineural hearing loss	1/15	0.0397569	0.407861	0	0	24.6914	79.629	GPX1
Hepatic Vein Thrombosis	1/15	0.0397569	0.408287	0	0	24.6914	79.629	TET2
Leukemia, Prolymphocytic, B-Cell	1/15	0.0397569	0.408714	0	0	24.6914	79.629	CD38
Gastroschisis	1/15	0.0397569	0.409142	0	0	24.6914	79.629	LRP1
Down Syndrome, Partial Trisomy 21	1/15	0.0397569	0.409571	0	0	24.6914	79.629	SOD1
Salivary gland carcinoma	1/15	0.0397569	0.410001	0	0	24.6914	79.629	ACTN4
Executive dysfunction	1/15	0.0397569	0.410431	0	0	24.6914	79.629	DRD2
Atrophy, Muscular, Spinobulbar	1/15	0.0397569	0.410863	0	0	24.6914	79.629	SOD1
Reproductive tract infection	1/15	0.0397569	0.411295	0	0	24.6914	79.629	CD38
Pheochromocytoma	3/280	0.0399019	0.403868	0	0	3.96825	12.7831	NTRK1;DRD2;HRAS
ovarian neoplasm	6/938	0.0399548	0.403988	0	0	2.36911	7.62854	NTRK1;ACTN4;HRAS;MET;MAPK3;SOD1
Convulsions	2/118	0.0404748	0.408824	0	0	6.27746	20.1323	ADORA2A;DRD2
Experimental Organism Basal Cell Carcinoma	3/282	0.0406146	0.409816	0	0	3.94011	12.6226	CD38;HRAS;MAPK3
Low density lipoprotein cholesterol measurement	3/283	0.0409734	0.413012	0	0	3.92619	12.5435	GPX1;LRP1;SYN1
Drug Use Disorders	2/119	0.0410968	0.412985	0	0	6.22471	19.8682	CADPS2;DRD2
Muscle Rigidity	2/119	0.0410968	0.413408	0	0	6.22471	19.8682	DRD2;SOD1
Von Hippel-Lindau Syndrome	2/119	0.0410968	0.413831	0	0	6.22471	19.8682	NTRK1;MET
Neurologic Symptoms	2/120	0.0417225	0.418417	0	0	6.17284	19.6093	SYN1;SOD1
Liver Failure, Acute	2/120	0.0417225	0.418845	0	0	6.17284	19.6093	CX3CR1;MET
Duration of sleep	1/16	0.0423515	0.409675	0	0	23.1481	73.1887	DRD2
Diffuse mesangial sclerosis (disorder)	1/16	0.0423515	0.410079	0	0	23.1481	73.1887	ACTN4
Pontoneocerebellar hypoplasia	1/16	0.0423515	0.410483	0	0	23.1481	73.1887	CHMP1A
Contracture of tendo achilles	1/16	0.0423515	0.410889	0	0	23.1481	73.1887	HRAS
Paroxysmal Nerve Pain	1/16	0.0423515	0.411295	0	0	23.1481	73.1887	NTRK1
Chronic lymphocytic leukaemia refractory	1/16	0.0423515	0.411702	0	0	23.1481	73.1887	SF3B1
Childhood Synovial Sarcoma	1/16	0.0423515	0.412109	0	0	23.1481	73.1887	MET
Neoplasm of uncertain or unknown behavior of bladder	1/16	0.0423515	0.412518	0	0	23.1481	73.1887	HRAS
Myxoma of the Endocardium	1/16	0.0423515	0.412927	0	0	23.1481	73.1887	MAPK3
Carotid Artery Thrombosis	1/16	0.0423515	0.413337	0	0	23.1481	73.1887	SOD1
Cannabis Abuse	1/16	0.0423515	0.413748	0	0	23.1481	73.1887	CAMK2B
Methamphetamine dependence	1/16	0.0423515	0.414159	0	0	23.1481	73.1887	DRD2
Benign neoplasm of bladder	1/16	0.0423515	0.414572	0	0	23.1481	73.1887	HRAS
Autosomal dominant hypocalcemia	1/16	0.0423515	0.414985	0	0	23.1481	73.1887	AP2S1
Malignant melanoma of choroid	1/16	0.0423515	0.415399	0	0	23.1481	73.1887	SF3B1
Lepidic Predominant Adenocarcinoma	1/16	0.0423515	0.415814	0	0	23.1481	73.1887	MAPK3
Lateral Sclerosis	1/16	0.0423515	0.41623	0	0	23.1481	73.1887	SOD1
Hypotonic seizures	1/16	0.0423515	0.416647	0	0	23.1481	73.1887	SCN1A
Sudden loss of muscle tone	1/16	0.0423515	0.417064	0	0	23.1481	73.1887	SCN1A
Hereditary Sensory and Autonomic Neuropathies	1/16	0.0423515	0.417483	0	0	23.1481	73.1887	NTRK1
Phobia, Social	1/16	0.0423515	0.417902	0	0	23.1481	73.1887	DRD2
Neuralgia, Vidian	1/16	0.0423515	0.418322	0	0	23.1481	73.1887	NTRK1
Neuralgia, Supraorbital	1/16	0.0423515	0.418743	0	0	23.1481	73.1887	NTRK1
Neuralgia, Stump	1/16	0.0423515	0.419164	0	0	23.1481	73.1887	NTRK1
Neuralgia, Perineal	1/16	0.0423515	0.419587	0	0	23.1481	73.1887	NTRK1
Neuralgia, Ilioinguinal	1/16	0.0423515	0.42001	0	0	23.1481	73.1887	NTRK1
Neuralgia, Iliohypogastric Nerve	1/16	0.0423515	0.420435	0	0	23.1481	73.1887	NTRK1
Neuralgia, Atypical	1/16	0.0423515	0.42086	0	0	23.1481	73.1887	NTRK1
Sore to touch	1/16	0.0423515	0.421286	0	0	23.1481	73.1887	CD38
Serous cystadenocarcinoma ovary	1/16	0.0423515	0.421713	0	0	23.1481	73.1887	HRAS
Selenium deficiency	1/16	0.0423515	0.42214	0	0	23.1481	73.1887	GPX1
Dyskinesia, Medication-Induced	1/16	0.0423515	0.422569	0	0	23.1481	73.1887	DRD2
Familial Hemiplegic Migraine	1/16	0.0423515	0.422998	0	0	23.1481	73.1887	SCN1A
Familial Dystonia	1/16	0.0423515	0.423429	0	0	23.1481	73.1887	ATP1A3
Reoviridae Infections	1/16	0.0423515	0.42386	0	0	23.1481	73.1887	MAPK3
Recurrent depression	1/16	0.0423515	0.424292	0	0	23.1481	73.1887	DRD2
Malignant neoplasm of ovary	10/2026	0.0426509	0.412166	0	0	1.82809	5.76708	NTRK1;LRP1;DNER;ACTN4;DRD2;HRAS;MET;SCN1A;MAPK3;SOD1
Aortic Aneurysm, Abdominal	3/288	0.0427917	0.413121	0	0	3.85802	12.1582	CX3CR1;LRP1;MAPK3
Acute leukemia	4/492	0.0435946	0.420459	0	0	3.01114	9.43337	TET2;CD38;HRAS;SF3B1
Involuntary jerking movements	2/123	0.0436211	0.41907	0	0	6.02228	18.8631	DRD2;SCN1A
Hyperplasia	2/123	0.0436211	0.41948	0	0	6.02228	18.8631	GPX1;SOD1
Substance-Related Disorders	2/123	0.0436211	0.419891	0	0	6.02228	18.8631	CADPS2;DRD2
Spasmodic movement	2/123	0.0436211	0.420302	0	0	6.02228	18.8631	DRD2;SCN1A
CNS disorder	2/124	0.0442611	0.424388	0	0	5.97372	18.624	ADORA2A;DRD2
Hyperthyroidism	2/124	0.0442611	0.424803	0	0	5.97372	18.624	GPX1;SOD1
Bladder Neoplasm	7/1217	0.044289	0.424242	0	0	2.13031	6.64023	NTRK1;SNAP25;GPX1;ADORA2A;HRAS;MET;MAPK3
Thyroid carcinoma	5/721	0.0445266	0.426103	0	0	2.56845	7.99216	NTRK1;DNER;HRAS;MET;MAPK3
Congenital hypoplasia of lung	2/125	0.0449046	0.429302	0	0	5.92593	18.3894	ETFB;MAPK3
Psychological symptom	1/17	0.0449392	0.417845	0	0	21.7865	67.5914	SCN1A
Dopa-Responsive Dystonia	1/17	0.0449392	0.418241	0	0	21.7865	67.5914	DRD2
Portal vein thrombosis	1/17	0.0449392	0.418637	0	0	21.7865	67.5914	MET
Polycystic liver disease	1/17	0.0449392	0.419034	0	0	21.7865	67.5914	ADCY5
Curly hair (finding)	1/17	0.0449392	0.419432	0	0	21.7865	67.5914	HRAS
Congenital pontocerebellar hypoplasia	1/17	0.0449392	0.419831	0	0	21.7865	67.5914	CHMP1A
Completed Suicide	1/17	0.0449392	0.420231	0	0	21.7865	67.5914	PPP1R1B
Non-Functioning Pituitary Gland Neoplasm	1/17	0.0449392	0.420631	0	0	21.7865	67.5914	DRD2
Neurofibrosarcoma	1/17	0.0449392	0.421032	0	0	21.7865	67.5914	SYN1
Nerve Pain	1/17	0.0449392	0.421433	0	0	21.7865	67.5914	NTRK1
Carcinoma in situ of bladder	1/17	0.0449392	0.421836	0	0	21.7865	67.5914	HRAS
Multiple congenital anomalies	1/17	0.0449392	0.422239	0	0	21.7865	67.5914	NRXN1
Blastic plasmacytoid dendritic cell neoplasm	1/17	0.0449392	0.422643	0	0	21.7865	67.5914	TET2
Macroangiopathy	1/17	0.0449392	0.423048	0	0	21.7865	67.5914	SOD1
Lesch-Nyhan Syndrome	1/17	0.0449392	0.423454	0	0	21.7865	67.5914	ADORA2A
Alcohol problem	1/17	0.0449392	0.42386	0	0	21.7865	67.5914	DRD2
Alagille Syndrome	1/17	0.0449392	0.424267	0	0	21.7865	67.5914	DRD2
Zollinger-Ellison syndrome	1/17	0.0449392	0.424675	0	0	21.7865	67.5914	MET
Vocal Cord Paralysis	1/17	0.0449392	0.425084	0	0	21.7865	67.5914	SOD1
Ileus	1/17	0.0449392	0.425494	0	0	21.7865	67.5914	HRAS
Hypomagnesemia	1/17	0.0449392	0.425904	0	0	21.7865	67.5914	GABRA3
Tonic-Clonic Epilepsy	1/17	0.0449392	0.426315	0	0	21.7865	67.5914	SCN1A
Hepatic necrosis	1/17	0.0449392	0.426727	0	0	21.7865	67.5914	MET
Motor Neuron Disease, Lower	1/17	0.0449392	0.42714	0	0	21.7865	67.5914	SOD1
Genu recurvatum	1/17	0.0449392	0.427553	0	0	21.7865	67.5914	HRAS
Hereditary Sensory Autonomic Neuropathy, Type 1	1/17	0.0449392	0.427967	0	0	21.7865	67.5914	NTRK1
Gonadal Dysgenesis, 45,X	1/17	0.0449392	0.428382	0	0	21.7865	67.5914	SOD1
Schistosomiasis mansoni	1/17	0.0449392	0.428798	0	0	21.7865	67.5914	SOD1
Rhinosinusitis	1/17	0.0449392	0.429215	0	0	21.7865	67.5914	MET
Pituitary Adenoma	3/294	0.0450267	0.418263	0	0	3.77929	11.7177	DRD2;MAPK3;SOD1
Myocarditis	2/126	0.0455516	0.42234	0	0	5.87889	18.1594	CX3CR1;MAPK3
Left-Sided Heart Failure	2/126	0.0455516	0.422739	0	0	5.87889	18.1594	ATP1A3;SOD1
Idiopathic pulmonary arterial hypertension	3/297	0.0461658	0.427632	0	0	3.74111	11.5059	CX3CR1;MAPK3;SOD1
B-Cell Lymphomas	5/730	0.0465384	0.430272	0	0	2.53678	7.78153	CX3CR1;TET2;CD38;SF3B1;MAPK3
Leukemogenesis	5/730	0.0465384	0.430678	0	0	2.53678	7.78153	CX3CR1;TET2;CD38;SF3B1;MAPK3
Fibrosarcoma	3/298	0.0465487	0.429559	0	0	3.72856	11.4365	HRAS;MET;SYN1
Epithelioma	3/298	0.0465487	0.429963	0	0	3.72856	11.4365	NTRK1;HRAS;MET
Herpes Simplex Infections	4/503	0.0466289	0.429896	0	0	2.94529	9.02889	CX3CR1;GRIN2A;CD38;SOD1
Sarcomatoid Renal Cell Carcinoma	2/128	0.0468559	0.431584	0	0	5.78704	17.7123	TET2;MET
Hereditary Diffuse Gastric Cancer	3/300	0.0473192	0.435443	0	0	3.7037	11.2994	HRAS;MET;MAPK3
Malignant neoplasm of larynx	2/129	0.0475132	0.43682	0	0	5.74218	17.495	GPX1;MAPK3
Protrusion of tongue	1/18	0.04752	0.426119	0	0	20.5761	62.6873	NRXN1
Proliferative Inflammatory Atrophy	1/18	0.04752	0.426509	0	0	20.5761	62.6873	MET
Papillomatosis	1/18	0.04752	0.426898	0	0	20.5761	62.6873	HRAS
Congenital bilateral aplasia of vas deferens	1/18	0.04752	0.427289	0	0	20.5761	62.6873	NTRK1
Compression of spinal cord	1/18	0.04752	0.42768	0	0	20.5761	62.6873	SOD1
Osteofibrous Dysplasia	1/18	0.04752	0.428072	0	0	20.5761	62.6873	MET
Coloboma of optic disc	1/18	0.04752	0.428465	0	0	20.5761	62.6873	CD38
Oppositional Defiant Disorder	1/18	0.04752	0.428859	0	0	20.5761	62.6873	SNAP25
Neoplasm of uncertain or unknown behavior of stomach	1/18	0.04752	0.429253	0	0	20.5761	62.6873	MET
Nappy hair texture	1/18	0.04752	0.429648	0	0	20.5761	62.6873	HRAS
Carcinoma in situ of stomach	1/18	0.04752	0.430043	0	0	20.5761	62.6873	MET
Benign neoplasm of stomach	1/18	0.04752	0.43044	0	0	20.5761	62.6873	MET
Barrel chest	1/18	0.04752	0.430837	0	0	20.5761	62.6873	HRAS
Malignant neoplasm of other specified sites of female breast	1/18	0.04752	0.431234	0	0	20.5761	62.6873	MET
Kinky hair texture	1/18	0.04752	0.431633	0	0	20.5761	62.6873	HRAS
Afro-textured hair	1/18	0.04752	0.432032	0	0	20.5761	62.6873	HRAS
Wooly hair	1/18	0.04752	0.432432	0	0	20.5761	62.6873	HRAS
Venous malformation	1/18	0.04752	0.432833	0	0	20.5761	62.6873	NTRK1
Hypocupremia	1/18	0.04752	0.433235	0	0	20.5761	62.6873	SOD1
Tobacco Use Disorder	1/18	0.04752	0.433637	0	0	20.5761	62.6873	DRD2
Papillary renal cell carcinoma, sporadic	1/18	0.04752	0.43404	0	0	20.5761	62.6873	HRAS
Leprosy, Paucibacillary	1/18	0.04752	0.434444	0	0	20.5761	62.6873	LRP1
Sexually Transmitted Diseases	1/18	0.04752	0.434848	0	0	20.5761	62.6873	CD38
ECTODERMAL DYSPLASIA 11B, HYPOHIDROTIC/HAIR/TOOTH TYPE, AUTOSOMAL RECESSIVE	1/18	0.04752	0.435253	0	0	20.5761	62.6873	CD38
ECTODERMAL DYSPLASIA 10B, HYPOHIDROTIC/HAIR/TOOTH TYPE, AUTOSOMAL RECESSIVE	1/18	0.04752	0.435659	0	0	20.5761	62.6873	CD38
Dyskinesia, Drug-Induced	1/18	0.04752	0.436066	0	0	20.5761	62.6873	DRD2
AMYOTROPHIC LATERAL SCLEROSIS 2, JUVENILE (disorder)	1/18	0.04752	0.436474	0	0	20.5761	62.6873	SOD1
Hyperreflexia	3/301	0.0477069	0.427405	0	0	3.6914	11.2317	CHMP1A;HRAS;SOD1
Diabetes Mellitus	8/1507	0.0479941	0.429587	0	0	1.96613	5.97051	CX3CR1;SNAP25;GPX1;ADORA2A;CD38;ADCY5;MAPK3;SOD1
Pancreatitis, Chronic	3/302	0.0480961	0.430108	0	0	3.67918	11.1647	CX3CR1;NTRK1;HRAS
Primary sclerosing cholangitis	2/130	0.048174	0.430022	0	0	5.69801	17.2817	CX3CR1;MAPK3
Congenital pes cavus	2/130	0.048174	0.430413	0	0	5.69801	17.2817	CHMP1A;ATP1A3
Neoplastic Cell Transformation	2/131	0.0488381	0.435554	0	0	5.65451	17.0723	HRAS;SOD1
Cardiac Arrhythmia	2/132	0.0495055	0.441106	0	0	5.61167	16.8668	ANK2;HRAS
Neurodegenerative Disorders	5/745	0.0500117	0.445213	0	0	2.48571	7.44593	CX3CR1;ADORA2A;DPYSL2;APBB1;SOD1
Endogenous Hyperinsulinism	1/19	0.050094	0.436071	0	0	19.4932	58.3597	GPX1
Organic writer's cramp	1/19	0.050094	0.436458	0	0	19.4932	58.3597	DRD2
Classical phenylketonuria	1/19	0.050094	0.436845	0	0	19.4932	58.3597	SOD1
CADASIL Syndrome	1/19	0.050094	0.437233	0	0	19.4932	58.3597	SOD1
Bipolar II disorder	1/19	0.050094	0.437622	0	0	19.4932	58.3597	DRD2
Lack of skin elasticity	1/19	0.050094	0.438011	0	0	19.4932	58.3597	HRAS
Alcohol Withdrawal Delirium	1/19	0.050094	0.438401	0	0	19.4932	58.3597	DRD2
Intestinal Volvulus	1/19	0.050094	0.438792	0	0	19.4932	58.3597	SOD1
Intermittent fever	1/19	0.050094	0.439183	0	0	19.4932	58.3597	NTRK1
Tracheomalacia	1/19	0.050094	0.439575	0	0	19.4932	58.3597	HRAS
Hypertrophy	1/19	0.050094	0.439968	0	0	19.4932	58.3597	MAPK3
Holt-Oram syndrome	1/19	0.050094	0.440362	0	0	19.4932	58.3597	MET
Tachyarrhythmia	1/19	0.050094	0.440756	0	0	19.4932	58.3597	DRD2
Stretched skin	1/19	0.050094	0.441151	0	0	19.4932	58.3597	HRAS
Papilloma, Squamous Cell	1/19	0.050094	0.441546	0	0	19.4932	58.3597	HRAS
Squamous cell carcinoma of vulva	1/19	0.050094	0.441943	0	0	19.4932	58.3597	HRAS
Myasthenic Syndromes, Congenital, Slow Channel	1/19	0.050094	0.44234	0	0	19.4932	58.3597	SNAP25
Hypothermia, natural	1/19	0.050094	0.442738	0	0	19.4932	58.3597	SOD1
Fragile nails	1/19	0.050094	0.443136	0	0	19.4932	58.3597	HRAS
Self Mutilation	1/19	0.050094	0.443535	0	0	19.4932	58.3597	NTRK1
Dystonia, Diurnal	1/19	0.050094	0.443935	0	0	19.4932	58.3597	ATP1A3
Fallopian Tube Carcinoma	1/19	0.050094	0.444336	0	0	19.4932	58.3597	ACTN4
Exogenous Hyperinsulinism	1/19	0.050094	0.444737	0	0	19.4932	58.3597	GPX1
Eosinophilic leukemia	1/19	0.050094	0.445139	0	0	19.4932	58.3597	CX3CR1
Adenocarcinoma of lung, stage IV	1/19	0.050094	0.445542	0	0	19.4932	58.3597	MET
Lewy Body Disease	2/133	0.0501763	0.436401	0	0	5.56948	16.6651	NTRK1;SOD1
Malignant neoplasm of large intestine	4/516	0.0503646	0.437651	0	0	2.87109	8.58015	DNER;ACTN4;HRAS;MET
Peripheral Neuropathy	3/309	0.0508648	0.441607	0	0	3.59583	10.7105	NTRK1;GPX1;SBF1
Endometriosis	5/749	0.0509633	0.442072	0	0	2.47243	7.35956	NTRK1;ACTN4;DRD2;MET;MAPK3
Colon Carcinoma	10/2091	0.0511074	0.442931	0	0	1.77126	5.26742	NTRK1;GRIN2A;GPX1;LRP1;DPYSL2;HRAS;MET;SF3B1;PPP1R9B;MAPK3
Mammary Neoplasms	11/2387	0.051573	0.446572	0	0	1.70678	5.06018	CAMK2B;NTRK1;GPX1;LRP1;PPP1R1B;NR2F1;HRAS;MET;SF3B1;MAPK3;SOD1
Porencephalic cyst	1/20	0.0526612	0.448876	0	0	18.5185	54.5162	HRAS
Congenital abnormality of vein	1/20	0.0526612	0.449266	0	0	18.5185	54.5162	NTRK1
Ovarian Clear Cell Adenocarcinoma	1/20	0.0526612	0.449656	0	0	18.5185	54.5162	MET
Compensatory Hyperinsulinemia	1/20	0.0526612	0.450047	0	0	18.5185	54.5162	GPX1
Chronic multifocal osteomyelitis	1/20	0.0526612	0.450439	0	0	18.5185	54.5162	MAPK3
Multiple System Atrophy	1/20	0.0526612	0.450831	0	0	18.5185	54.5162	PPP1R1B
Basal Ganglia Diseases	1/20	0.0526612	0.451224	0	0	18.5185	54.5162	DRD2
Adenosis of Breast	1/20	0.0526612	0.451618	0	0	18.5185	54.5162	NTRK1
Adenomatous goiter	1/20	0.0526612	0.452013	0	0	18.5185	54.5162	MET
Infantile neuronal ceroid lipofuscinosis	1/20	0.0526612	0.452408	0	0	18.5185	54.5162	DPYSL2
Hypophosphatemic Rickets	1/20	0.0526612	0.452804	0	0	18.5185	54.5162	HRAS
Thymoma, type C	1/20	0.0526612	0.4532	0	0	18.5185	54.5162	HRAS
Squamous cell carcinoma of penis	1/20	0.0526612	0.453597	0	0	18.5185	54.5162	HRAS
Spinal canal stenosis	1/20	0.0526612	0.453995	0	0	18.5185	54.5162	CD38
Solitary fibrous tumor	1/20	0.0526612	0.454394	0	0	18.5185	54.5162	MET
Fibrosis of pancreas	1/20	0.0526612	0.454793	0	0	18.5185	54.5162	NTRK1
Arnold-Chiari Malformation, Type I	1/20	0.0526612	0.455193	0	0	18.5185	54.5162	HRAS
Enteropathy-Associated T-Cell Lymphoma	1/20	0.0526612	0.455594	0	0	18.5185	54.5162	TET2
Diabetes	7/1268	0.053192	0.453008	0	0	2.04463	5.99863	CX3CR1;SNAP25;GPX1;ADORA2A;CD38;ADCY5;SOD1
Collecting Duct Carcinoma of the Kidney	2/138	0.0535796	0.455519	0	0	5.36769	15.709	TET2;MET
Mental Retardation, Psychosocial	2/138	0.0535796	0.455913	0	0	5.36769	15.709	NRXN1;SCN1A
Sepsis	4/529	0.0542622	0.460924	0	0	2.80053	8.16055	CX3CR1;ADORA2A;SCN1A;MAPK3
Acid reflux	2/140	0.0549635	0.466477	0	0	5.29101	15.3497	NRXN1;HRAS
Prolonged QT interval	1/21	0.0552216	0.46032	0	0	17.6367	51.0829	ANK2
Diabetic peripheral neuropathy	1/21	0.0552216	0.460711	0	0	17.6367	51.0829	GPX1
Pathological accumulation of air in tissues	1/21	0.0552216	0.461103	0	0	17.6367	51.0829	MET
pathologic fistula	1/21	0.0552216	0.461495	0	0	17.6367	51.0829	MAPK3
Papillon-Lefevre Disease	1/21	0.0552216	0.461887	0	0	17.6367	51.0829	SOD1
Clumsiness - motor delay	1/21	0.0552216	0.462281	0	0	17.6367	51.0829	ATP1A3
Olivopontocerebellar Atrophies	1/21	0.0552216	0.462675	0	0	17.6367	51.0829	SNAP25
Chronic venous insufficiency	1/21	0.0552216	0.46307	0	0	17.6367	51.0829	MAPK3
Neonatal Death	1/21	0.0552216	0.463465	0	0	17.6367	51.0829	ETFB
Mental handicap	1/21	0.0552216	0.463861	0	0	17.6367	51.0829	HRAS
Lung Injury	1/21	0.0552216	0.464258	0	0	17.6367	51.0829	NTRK1
inflammatory joint disease	1/21	0.0552216	0.464656	0	0	17.6367	51.0829	ADORA2A
Torsades de Pointes	1/21	0.0552216	0.465054	0	0	17.6367	51.0829	ANK2
Herpes encephalitis	1/21	0.0552216	0.465453	0	0	17.6367	51.0829	CX3CR1
Neoplasms, Radiation-Induced	1/21	0.0552216	0.465852	0	0	17.6367	51.0829	NTRK1
Neoplasms, Neuroepithelial	1/21	0.0552216	0.466252	0	0	17.6367	51.0829	GRIN2A
Sinus Node Dysfunction (disorder)	1/21	0.0552216	0.466653	0	0	17.6367	51.0829	ANK2
Shared Paranoid Disorder	1/21	0.0552216	0.467055	0	0	17.6367	51.0829	DPYSL2
Fibrous skin tumor of tuberous sclerosis	1/21	0.0552216	0.467457	0	0	17.6367	51.0829	HRAS
Disruptive, Impulse Control, and Conduct Disorders	1/21	0.0552216	0.46786	0	0	17.6367	51.0829	DRD2
Congenital Myasthenic Syndromes, Presynaptic	1/21	0.0552216	0.468264	0	0	17.6367	51.0829	SNAP25
Electroencephalogram abnormal	2/141	0.0556601	0.463583	0	0	5.25348	15.1746	HRAS;SCN1A
Lymphatic Metastasis	2/142	0.05636	0.469014	0	0	5.21648	15.0026	MET;MAPK3
Supratentorial atrophy	2/143	0.0570629	0.474061	0	0	5.18001	14.8335	HRAS;SCN1A
Substance Use Disorders	2/143	0.0570629	0.474462	0	0	5.18001	14.8335	CADPS2;DRD2
Heart Diseases	3/325	0.0574797	0.477121	0	0	3.4188	9.76521	ANK2;MET;SF3B1
Encephalitis	2/144	0.057769	0.479117	0	0	5.14403	14.6672	CX3CR1;CD38
Protein Misfolding Disorders	1/22	0.0577752	0.468107	0	0	16.835	47.9999	SOD1
Disturbance of consciousness	1/22	0.0577752	0.468494	0	0	16.835	47.9999	ATP1A3
Pneumoconiosis	1/22	0.0577752	0.468881	0	0	16.835	47.9999	CX3CR1
Conduct Disorder	1/22	0.0577752	0.469268	0	0	16.835	47.9999	DRD2
Other specified manifestations of hyperkinetic syndrome	1/22	0.0577752	0.469656	0	0	16.835	47.9999	SNAP25
Columnar Cell Hyperplasia of the Breast	1/22	0.0577752	0.470045	0	0	16.835	47.9999	NTRK1
Nephrosclerosis	1/22	0.0577752	0.470434	0	0	16.835	47.9999	ACTN4
Minimal Brain Dysfunction	1/22	0.0577752	0.470824	0	0	16.835	47.9999	DRD2
Benign Rolandic Epilepsy	1/22	0.0577752	0.471215	0	0	16.835	47.9999	GRIN2A
Benign neoplasm of aortic body and other paraganglia	1/22	0.0577752	0.471607	0	0	16.835	47.9999	MET
Malignant neoplasm of aortic body and other paraganglia	1/22	0.0577752	0.471999	0	0	16.835	47.9999	MET
Malignant Adrenal Medulla Neoplasm	1/22	0.0577752	0.472391	0	0	16.835	47.9999	MET
Anaplastic large B-cell lymphoma	1/22	0.0577752	0.472785	0	0	16.835	47.9999	NTRK1
Laryngomalacia	1/22	0.0577752	0.473179	0	0	16.835	47.9999	AHDC1
Kashin-Beck Disease	1/22	0.0577752	0.473573	0	0	16.835	47.9999	GPX1
Adenoid cystic carcinoma of salivary gland	1/22	0.0577752	0.473969	0	0	16.835	47.9999	MET
THYROID CARCINOMA, SPORADIC MEDULLARY	1/22	0.0577752	0.474365	0	0	16.835	47.9999	NTRK1
SIMPSON-GOLABI-BEHMEL SYNDROME, TYPE 1	1/22	0.0577752	0.474761	0	0	16.835	47.9999	MAPK3
TDP-43 Proteinopathies	1/22	0.0577752	0.475158	0	0	16.835	47.9999	SOD1
Sudden death	1/22	0.0577752	0.475556	0	0	16.835	47.9999	HRAS
Squamous cell carcinoma of tonsil	1/22	0.0577752	0.475955	0	0	16.835	47.9999	MET
Gingival Hemorrhage	1/22	0.0577752	0.476354	0	0	16.835	47.9999	TET2
Self-Injurious Behavior	1/22	0.0577752	0.476754	0	0	16.835	47.9999	NTRK1
Self-harm	1/22	0.0577752	0.477155	0	0	16.835	47.9999	NTRK1
Fibromyxosarcoma	1/22	0.0577752	0.477556	0	0	16.835	47.9999	MET
Dystonia, Paroxysmal	1/22	0.0577752	0.477958	0	0	16.835	47.9999	ATP1A3
Resting Tremor	1/22	0.0577752	0.478361	0	0	16.835	47.9999	ADORA2A
Epidermodysplasia Verruciformis	1/22	0.0577752	0.478764	0	0	16.835	47.9999	SOD1
Nerve Degeneration	2/145	0.0584781	0.473023	0	0	5.10856	14.5037	MAPK3;SOD1
Thrombocythemia, Essential	2/145	0.0584781	0.473412	0	0	5.10856	14.5037	NTRK1;TET2
Fibrosis, Liver	4/545	0.0592802	0.479117	0	0	2.71831	7.68054	CX3CR1;ADORA2A;CD38;MET
Hepatitis C	5/783	0.0594868	0.480392	0	0	2.36507	6.67424	GPX1;CD38;HRAS;MET;SOD1
Fatigue	3/330	0.0596274	0.481131	0	0	3.367	9.49374	TET2;MET;SOD1
Hematological Disease	2/147	0.0599054	0.482978	0	0	5.03905	14.1849	TET2;SF3B1
cocaine use	1/23	0.060322	0.47926	0	0	16.1031	45.2183	SCN1A
Cholesteatoma	1/23	0.060322	0.479648	0	0	16.1031	45.2183	MAPK3
Neurocysticercosis	1/23	0.060322	0.480036	0	0	16.1031	45.2183	CD38
Mutism	1/23	0.060322	0.480425	0	0	16.1031	45.2183	ATP1A3
Multi-infarct dementia	1/23	0.060322	0.480815	0	0	16.1031	45.2183	GPX1
C-cell hyperplasia of thyroid	1/23	0.060322	0.481205	0	0	16.1031	45.2183	NTRK1
Bloch Sulzberger syndrome	1/23	0.060322	0.481596	0	0	16.1031	45.2183	CD38
Meningomyelocele	1/23	0.060322	0.481987	0	0	16.1031	45.2183	SOD1
Benign neoplasm of adrenal gland	1/23	0.060322	0.482379	0	0	16.1031	45.2183	MET
Aniridia	1/23	0.060322	0.482772	0	0	16.1031	45.2183	HRAS
Andersen Syndrome	1/23	0.060322	0.483166	0	0	16.1031	45.2183	ANK2
Hypoxic-Ischemic Encephalopathy	1/23	0.060322	0.48356	0	0	16.1031	45.2183	GPX1
Tinnitus	1/23	0.060322	0.483955	0	0	16.1031	45.2183	TET2
Hunger	1/23	0.060322	0.48435	0	0	16.1031	45.2183	SNAP25
Hemimegalencephaly	1/23	0.060322	0.484746	0	0	16.1031	45.2183	HRAS
Lupus Erythematosus, Subacute Cutaneous	1/23	0.060322	0.485143	0	0	16.1031	45.2183	MBD3
Congenital Myasthenic Syndromes, Postsynaptic	1/23	0.060322	0.48554	0	0	16.1031	45.2183	SNAP25
Renal sclerosis with hypertension	1/23	0.060322	0.485938	0	0	16.1031	45.2183	ACTN4
Dystonic disease	2/148	0.0606237	0.481268	0	0	5.00501	14.0294	ATP1A3;ADCY5
Chromophobe Renal Cell Carcinoma	2/149	0.0613449	0.4866	0	0	4.97141	13.8764	TET2;MET
Malignant mesothelioma	3/335	0.0618127	0.489916	0	0	3.31675	9.23266	MET;SF3B1;MAPK3
Monoclonal Gammopathy of Undetermined Significance	2/150	0.0620691	0.491155	0	0	4.93827	13.726	CD38;MET
Mild cognitive disorder	2/150	0.0620691	0.491551	0	0	4.93827	13.726	ADORA2A;SOD1
Triglycerides measurement	3/336	0.0622543	0.492224	0	0	3.30688	9.18164	LRP1;PPP1R1B;MET
Squamous cell carcinoma	9/1876	0.0624243	0.493172	0	0	1.77683	4.92857	NTRK1;GPX1;PPP1R1B;ACTN4;HRAS;MET;SCN1A;MAPK3;SOD1
Primary Sj??gren's syndrome	2/151	0.0627962	0.495314	0	0	4.90557	13.5779	CX3CR1;NTRK1
Malignant Squamous Cell Neoplasm	2/151	0.0627962	0.495712	0	0	4.90557	13.5779	GPX1;MET
Elastosis perforans serpiginosa	1/24	0.062862	0.486463	0	0	15.4321	42.6977	DRD2
Postural instability	1/24	0.062862	0.486846	0	0	15.4321	42.6977	ATP1A3
Penis carcinoma	1/24	0.062862	0.48723	0	0	15.4321	42.6977	HRAS
Congenital hypoplasia of adrenal gland	1/24	0.062862	0.487615	0	0	15.4321	42.6977	ATP1A3
Overgrowth	1/24	0.062862	0.488	0	0	15.4321	42.6977	HRAS
Cognitive changes	1/24	0.062862	0.488386	0	0	15.4321	42.6977	SOD1
Norrie disease	1/24	0.062862	0.488772	0	0	15.4321	42.6977	SOD1
Child Development Deviations	1/24	0.062862	0.489159	0	0	15.4321	42.6977	DRD2
bilateral breast cancer	1/24	0.062862	0.489547	0	0	15.4321	42.6977	DRD2
Asphyxia Neonatorum	1/24	0.062862	0.489935	0	0	15.4321	42.6977	SOD1
Alcohol or Other Drugs use	1/24	0.062862	0.490324	0	0	15.4321	42.6977	DRD2
Adenoma of lung	1/24	0.062862	0.490713	0	0	15.4321	42.6977	MET
Inattention	1/24	0.062862	0.491103	0	0	15.4321	42.6977	SNAP25
Abnormality of the reproductive system	1/24	0.062862	0.491494	0	0	15.4321	42.6977	ETFB
Abnormality of the genital system	1/24	0.062862	0.491885	0	0	15.4321	42.6977	ETFB
VENTRICULAR TACHYCARDIA, CATECHOLAMINERGIC POLYMORPHIC, 1 (disorder)	1/24	0.062862	0.492277	0	0	15.4321	42.6977	ANK2
Thymus Neoplasms	1/24	0.062862	0.49267	0	0	15.4321	42.6977	HRAS
Healing ulcer	1/24	0.062862	0.493063	0	0	15.4321	42.6977	MET
Generalized overgrowth	1/24	0.062862	0.493457	0	0	15.4321	42.6977	HRAS
Focal Segmental Glomerulosclerosis, Not Otherwise Specified	1/24	0.062862	0.493851	0	0	15.4321	42.6977	ACTN4
Fetal overgrowth	1/24	0.062862	0.494246	0	0	15.4321	42.6977	HRAS
Sebaceous adenoma	1/24	0.062862	0.494642	0	0	15.4321	42.6977	HRAS
Child Development Disorders, Specific	1/24	0.062862	0.495038	0	0	15.4321	42.6977	DRD2
Episodic Ataxia	1/24	0.062862	0.495435	0	0	15.4321	42.6977	ATP1A3
Cerebral atrophy	3/338	0.0631419	0.488244	0	0	3.28731	9.08077	DRD2;HRAS;SCN1A
Primary Effusion Lymphoma	2/153	0.0642592	0.496103	0	0	4.84144	13.2889	NTRK1;MET
Sezary Syndrome	2/153	0.0642592	0.496493	0	0	4.84144	13.2889	NTRK1;TET2
Autoimmune Diseases	6/1060	0.0650531	0.501839	0	0	2.09644	5.72862	GRIN2A;LRP1;DNER;TET2;CD38;SOD1
Quadriplegia	1/25	0.0653953	0.495532	0	0	14.8148	40.4045	GABRA3
Plagiocephaly	1/25	0.0653953	0.495915	0	0	14.8148	40.4045	HRAS
Parathyroid Diseases	1/25	0.0653953	0.496297	0	0	14.8148	40.4045	NTRK1
CNS metastases	1/25	0.0653953	0.496681	0	0	14.8148	40.4045	NTRK1
Onion bulb formation	1/25	0.0653953	0.497065	0	0	14.8148	40.4045	SBF1
Malignant neoplasm of penis	1/25	0.0653953	0.49745	0	0	14.8148	40.4045	HRAS
Asymmetry of the posterior cranium	1/25	0.0653953	0.497835	0	0	14.8148	40.4045	HRAS
Astrocytosis	1/25	0.0653953	0.498221	0	0	14.8148	40.4045	MAPK3
Aortic Diseases	1/25	0.0653953	0.498608	0	0	14.8148	40.4045	SOD1
Increased intramyocellular lipid droplets	1/25	0.0653953	0.498995	0	0	14.8148	40.4045	GABRA3
Uterine Carcinosarcoma	1/25	0.0653953	0.499382	0	0	14.8148	40.4045	HRAS
Ulnar deviation of the fingers	1/25	0.0653953	0.499771	0	0	14.8148	40.4045	HRAS
T-Cell Large Granular Lymphocyte Leukemia	1/25	0.0653953	0.50016	0	0	14.8148	40.4045	SBF1
Plagiocephaly, Nonsynostotic	1/25	0.0653953	0.500549	0	0	14.8148	40.4045	HRAS
Steroid resistant nephrotic syndrome of childhood	1/25	0.0653953	0.500939	0	0	14.8148	40.4045	ACTN4
Spastic tetraparesis	1/25	0.0653953	0.50133	0	0	14.8148	40.4045	DNER
Hemangioma, Cavernous	1/25	0.0653953	0.501721	0	0	14.8148	40.4045	HRAS
Flattening of head	1/25	0.0653953	0.502113	0	0	14.8148	40.4045	HRAS
Flattening of cranial vault	1/25	0.0653953	0.502506	0	0	14.8148	40.4045	HRAS
Flat head	1/25	0.0653953	0.502899	0	0	14.8148	40.4045	HRAS
Dystonia, Primary	1/25	0.0653953	0.503293	0	0	14.8148	40.4045	ATP1A3
Rhomboid shaped head	1/25	0.0653953	0.503687	0	0	14.8148	40.4045	HRAS
Apraxia, Developmental Verbal	1/25	0.0653953	0.504083	0	0	14.8148	40.4045	LRP1
HIV Infections	5/806	0.0656939	0.497411	0	0	2.29758	6.25574	CX3CR1;SNAP25;DNER;CD38;HRAS
Monocyte count result	2/155	0.0657338	0.496184	0	0	4.77897	13.009	CX3CR1;NTRK1
Monocyte count procedure	2/155	0.0657338	0.496566	0	0	4.77897	13.009	CX3CR1;NTRK1
Aplastic Anemia	2/155	0.0657338	0.496948	0	0	4.77897	13.009	TET2;SF3B1
Substance abuse problem	2/155	0.0657338	0.49733	0	0	4.77897	13.009	CADPS2;DRD2
Cerebellar Ataxia	4/565	0.0658932	0.497005	0	0	2.62209	7.13136	SNAP25;GRIN2A;ATP1A3;SCN1A
Steatohepatitis	4/569	0.0672608	0.506932	0	0	2.60366	7.02774	GPX1;ETFB;MAPK3;SOD1
Defect of vertebral segmentation	1/26	0.0679219	0.504563	0	0	14.245	38.3105	HRAS
Plasmablastic lymphoma	1/26	0.0679219	0.504944	0	0	14.245	38.3105	CD38
Pituitary carcinoma	1/26	0.0679219	0.505327	0	0	14.245	38.3105	DRD2
Cortical gyral simplification	1/26	0.0679219	0.505709	0	0	14.245	38.3105	AHDC1
Overactive bladder syndrome	1/26	0.0679219	0.506093	0	0	14.245	38.3105	SNAP25
Carotid Artery Plaque	1/26	0.0679219	0.506477	0	0	14.245	38.3105	CX3CR1
Multiple lipomata	1/26	0.0679219	0.506861	0	0	14.245	38.3105	AP2S1
Borna Disease	1/26	0.0679219	0.507247	0	0	14.245	38.3105	CX3CR1
Metastatic osteosarcoma	1/26	0.0679219	0.507632	0	0	14.245	38.3105	MET
Menkes Kinky Hair Syndrome	1/26	0.0679219	0.508019	0	0	14.245	38.3105	CD38
Mast Cell Neoplasm	1/26	0.0679219	0.508406	0	0	14.245	38.3105	TET2
Malignant Uterine Corpus Neoplasm	1/26	0.0679219	0.508793	0	0	14.245	38.3105	HRAS
Anhidrosis	1/26	0.0679219	0.509181	0	0	14.245	38.3105	NTRK1
Zinc deficiency	1/26	0.0679219	0.50957	0	0	14.245	38.3105	SOD1
AA amyloidosis	1/26	0.0679219	0.509959	0	0	14.245	38.3105	SOD1
Hyperprolactinemia	1/26	0.0679219	0.510349	0	0	14.245	38.3105	DRD2
Steroid-resistant nephrotic syndrome	1/26	0.0679219	0.510739	0	0	14.245	38.3105	ACTN4
Dystonia, Limb	1/26	0.0679219	0.511131	0	0	14.245	38.3105	ATP1A3
Familial Atypical Mole Melanoma Syndrome	1/26	0.0679219	0.511522	0	0	14.245	38.3105	HRAS
Blindness, Legal	2/158	0.067967	0.504516	0	0	4.68823	12.6054	ATP1A3;SCN1A
Uterine Fibroids	3/349	0.0681293	0.504959	0	0	3.1837	8.55252	CD38;DRD2;HRAS
Malignant lymphoma, lymphocytic, intermediate differentiation, diffuse	3/349	0.0681293	0.50534	0	0	3.1837	8.55252	NTRK1;CD38;MCM6
Ovarian Carcinoma	10/2203	0.0682418	0.505411	0	0	1.68121	4.51354	CX3CR1;NTRK1;LRP1;DNER;ACTN4;DRD2;HRAS;MET;SCN1A;MAPK3
Turner Syndrome	2/160	0.0694698	0.514118	0	0	4.62963	12.3466	CD38;SOD1
Malignant neoplasm of endometrium	4/577	0.0700407	0.517953	0	0	2.56756	6.82632	TET2;HRAS;MET;MAPK3
Reactive systemic amyloidosis	1/27	0.0704418	0.515489	0	0	13.7174	36.3919	SOD1
Decreased albumin	1/27	0.0704418	0.515873	0	0	13.7174	36.3919	ACTN4
Pelizaeus-Merzbacher Disease	1/27	0.0704418	0.516258	0	0	13.7174	36.3919	CD38
Childhood Cerebral Astrocytoma	1/27	0.0704418	0.516643	0	0	13.7174	36.3919	MET
Calcium pyrophosphate deposition disease	1/27	0.0704418	0.517029	0	0	13.7174	36.3919	AP2S1
Mildly elevated creatine phosphokinase	1/27	0.0704418	0.517415	0	0	13.7174	36.3919	GABRA3
Basal cell nevus	1/27	0.0704418	0.517802	0	0	13.7174	36.3919	HRAS
Aphasia	1/27	0.0704418	0.51819	0	0	13.7174	36.3919	GRIN2A
Apathy	1/27	0.0704418	0.518578	0	0	13.7174	36.3919	SOD1
Intracranial Astrocytoma	1/27	0.0704418	0.518967	0	0	13.7174	36.3919	MET
Visual field defects	1/27	0.0704418	0.519356	0	0	13.7174	36.3919	NR2F1
Achondroplasia	1/27	0.0704418	0.519746	0	0	13.7174	36.3919	MAPK3
Urogenital Abnormalities	1/27	0.0704418	0.520137	0	0	13.7174	36.3919	HRAS
Extramedullary Hematopoiesis (disorder)	1/27	0.0704418	0.520528	0	0	13.7174	36.3919	TET2
Uterine Corpus Cancer	4/579	0.0707449	0.517322	0	0	2.55869	6.77714	TET2;HRAS;MET;MAPK3
Heartburn	2/162	0.0709835	0.518681	0	0	4.57247	12.0956	NRXN1;HRAS
Metastatic malignant neoplasm to brain	2/163	0.0717445	0.523463	0	0	4.54442	11.9729	ACTN4;MET
Inflammatory dermatosis	2/163	0.0717445	0.523852	0	0	4.54442	11.9729	CX3CR1;MAPK3
Blindness	2/164	0.0725081	0.528642	0	0	4.51671	11.8521	ATP1A3;SCN1A
Plasma cell dyscrasia	1/28	0.072955	0.529152	0	0	13.2275	34.6285	HRAS
Placental Insufficiency	1/28	0.072955	0.529543	0	0	13.2275	34.6285	GRIN2A
Viral myocarditis	1/28	0.072955	0.529935	0	0	13.2275	34.6285	MAPK3
Lung Diseases, Obstructive	1/28	0.072955	0.530327	0	0	13.2275	34.6285	CX3CR1
Seborrheic keratosis	1/28	0.072955	0.530719	0	0	13.2275	34.6285	NTRK1
Sarcopenia	1/28	0.072955	0.531112	0	0	13.2275	34.6285	SOD1
AMYOTROPHIC LATERAL SCLEROSIS 1, AUTOSOMAL RECESSIVE	1/28	0.072955	0.531506	0	0	13.2275	34.6285	SOD1
TARSAL-CARPAL COALITION SYNDROME	2/165	0.0732745	0.531078	0	0	4.48934	11.7331	SNAP25;HRAS
Malignant neoplasm of brain	2/166	0.0740434	0.535466	0	0	4.46229	11.6158	NTRK1;HRAS
Keratoconus	2/166	0.0740434	0.535861	0	0	4.46229	11.6158	HRAS;SOD1
invasive cancer	2/166	0.0740434	0.536256	0	0	4.46229	11.6158	CX3CR1;MET
Degenerative brain disorder	2/167	0.074815	0.539855	0	0	4.43557	11.5003	HRAS;SCN1A
Hereditary hemochromatosis	2/167	0.074815	0.540251	0	0	4.43557	11.5003	SCN1A;MAPK3
Follicular thyroid carcinoma	2/167	0.074815	0.540649	0	0	4.43557	11.5003	HRAS;MAPK3
Phenylketonurias	1/29	0.0754615	0.535864	0	0	12.7714	33.003	SOD1
Costello syndrome (disorder)	1/29	0.0754615	0.536251	0	0	12.7714	33.003	HRAS
Congenital sensorineural hearing loss	1/29	0.0754615	0.536639	0	0	12.7714	33.003	CD38
Congenital Fiber Type Disproportion	1/29	0.0754615	0.537028	0	0	12.7714	33.003	CD38
Paget Disease Extramammary	1/29	0.0754615	0.537417	0	0	12.7714	33.003	MAPK3
Other cataract	1/29	0.0754615	0.537807	0	0	12.7714	33.003	GPX1
Oral candidiasis	1/29	0.0754615	0.538197	0	0	12.7714	33.003	SOD1
Multiple endocrine neoplasia Type 2	1/29	0.0754615	0.538588	0	0	12.7714	33.003	NTRK1
Anthracosis	1/29	0.0754615	0.538979	0	0	12.7714	33.003	CX3CR1
LEOPARD Syndrome	1/29	0.0754615	0.539371	0	0	12.7714	33.003	MAPK3
Acute monocytic/monoblastic leukemia	1/29	0.0754615	0.539764	0	0	12.7714	33.003	CD38
Infection of bone	1/29	0.0754615	0.540157	0	0	12.7714	33.003	NTRK1
Ileitis	1/29	0.0754615	0.540551	0	0	12.7714	33.003	GPX1
Upper Respiratory Infections	1/29	0.0754615	0.540945	0	0	12.7714	33.003	CX3CR1
Subfertility, Female	1/29	0.0754615	0.54134	0	0	12.7714	33.003	MAPK3
Sterility, Postpartum	1/29	0.0754615	0.541735	0	0	12.7714	33.003	MAPK3
HMN (Hereditary Motor Neuropathy) Proximal Type I	1/29	0.0754615	0.542131	0	0	12.7714	33.003	SOD1
High Grade Cervical Intraepithelial Neoplasia	1/29	0.0754615	0.542528	0	0	12.7714	33.003	HRAS
Stage IV Breast Cancer AJCC v6 and v7	1/29	0.0754615	0.542925	0	0	12.7714	33.003	MET
Hyalinosis, Segmental Glomerular	1/29	0.0754615	0.543323	0	0	12.7714	33.003	ACTN4
Female sterility	1/29	0.0754615	0.543721	0	0	12.7714	33.003	MAPK3
Romano-Ward Syndrome	1/29	0.0754615	0.54412	0	0	12.7714	33.003	ANK2
Endometrial Carcinoma	5/840	0.0755195	0.535889	0	0	2.20459	5.69525	LRP1;TET2;HRAS;MET;MAPK3
Childhood Leukemia	2/168	0.0755893	0.53561	0	0	4.40917	11.3864	TET2;CD38
Breast adenocarcinoma	2/168	0.0755893	0.535997	0	0	4.40917	11.3864	GPX1;HRAS
Osteosarcoma	6/1103	0.0757283	0.536209	0	0	2.01471	5.19916	NTRK1;LRP1;HRAS;MET;MAPK3;SOD1
Cystic Fibrosis	4/594	0.076144	0.538764	0	0	2.49408	6.42257	NTRK1;INTS1;DNER;MET
Respiratory function loss	2/170	0.0771455	0.545457	0	0	4.3573	11.1637	SNAP25;TET2
Coinfection	2/171	0.0779274	0.55059	0	0	4.33182	11.0547	SNAP25;CD38
Protoplasmic astrocytoma	1/30	0.0779614	0.544566	0	0	12.3457	31.5005	MET
Poorly differentiated carcinoma	1/30	0.0779614	0.544953	0	0	12.3457	31.5005	MET
Polydipsia	1/30	0.0779614	0.545341	0	0	12.3457	31.5005	DRD2
Pain Disorder	1/30	0.0779614	0.54573	0	0	12.3457	31.5005	NTRK1
Noncancerous mole	1/30	0.0779614	0.546119	0	0	12.3457	31.5005	HRAS
Christ-Siemens-Touraine syndrome	1/30	0.0779614	0.546508	0	0	12.3457	31.5005	CD38
Narrow palate	1/30	0.0779614	0.546898	0	0	12.3457	31.5005	HRAS
Lymphoid neoplasm	1/30	0.0779614	0.547289	0	0	12.3457	31.5005	TET2
Lymphadenitis	1/30	0.0779614	0.54768	0	0	12.3457	31.5005	CX3CR1
Arteriovenous fistula	1/30	0.0779614	0.548072	0	0	12.3457	31.5005	LRP1
Amyotrophic Lateral Sclerosis With Dementia	1/30	0.0779614	0.548464	0	0	12.3457	31.5005	SOD1
Tongue Neoplasms	1/30	0.0779614	0.548857	0	0	12.3457	31.5005	HRAS
Tobacco Dependence	1/30	0.0779614	0.549251	0	0	12.3457	31.5005	DRD2
Thymic Carcinoma	1/30	0.0779614	0.549645	0	0	12.3457	31.5005	HRAS
Horseshoe Kidney	1/30	0.0779614	0.550039	0	0	12.3457	31.5005	HRAS
Optic Atrophy, Autosomal Dominant	1/30	0.0779614	0.550434	0	0	12.3457	31.5005	SOD1
Hepatomegaly	3/373	0.0796154	0.555725	0	0	2.97885	7.53812	TET2;ETFB;MET
Chronic Lymphocytic Leukemia	6/1120	0.0802135	0.559502	0	0	1.98413	5.00608	NTRK1;CD38;HRAS;MET;SF3B1;MAPK3
Early infantile epileptic encephalopathy with suppression bursts	1/31	0.0804546	0.558016	0	0	11.9474	30.1083	SCN1A
Pericardial effusion	1/31	0.0804546	0.55841	0	0	11.9474	30.1083	MET
Neoplastic disease	1/31	0.0804546	0.558804	0	0	11.9474	30.1083	HRAS
Bulimia	1/31	0.0804546	0.559199	0	0	11.9474	30.1083	DRD2
AIDS-Associated Nephropathy	1/31	0.0804546	0.559595	0	0	11.9474	30.1083	ACTN4
Invasive Skin Melanoma	1/31	0.0804546	0.559992	0	0	11.9474	30.1083	ACTN4
Impaired pain sensation	1/31	0.0804546	0.560388	0	0	11.9474	30.1083	NTRK1
Major depression, single episode	1/31	0.0804546	0.560786	0	0	11.9474	30.1083	DRD2
Drug-Induced Liver Disease	3/377	0.081608	0.565616	0	0	2.94724	7.38529	CADPS2;GPX1;SOD1
Well Differentiated Oligodendroglioma	2/176	0.0818748	0.567065	0	0	4.20875	10.5327	MET;SYN1
Easy fatigability	1/32	0.0829412	0.567651	0	0	11.5741	28.8151	SNAP25
Peritoneal Fibrosis	1/32	0.0829412	0.568046	0	0	11.5741	28.8151	MAPK3
Neurotoxicity Syndromes	1/32	0.0829412	0.568443	0	0	11.5741	28.8151	DRD2
Cardiovascular morbidity	1/32	0.0829412	0.568839	0	0	11.5741	28.8151	SOD1
Bowen's Disease	1/32	0.0829412	0.569236	0	0	11.5741	28.8151	MAPK3
Lipomatosis	1/32	0.0829412	0.569634	0	0	11.5741	28.8151	AP2S1
Iron deficiency anemia	1/32	0.0829412	0.570033	0	0	11.5741	28.8151	SOD1
Increased incidence of hepatocellular carcinoma	1/32	0.0829412	0.570431	0	0	11.5741	28.8151	MET
Increased hepatocellular carcinoma risk	1/32	0.0829412	0.570831	0	0	11.5741	28.8151	MET
Unverricht-Lundborg Syndrome	1/32	0.0829412	0.571231	0	0	11.5741	28.8151	SNAP25
Tires quickly	1/32	0.0829412	0.571632	0	0	11.5741	28.8151	SNAP25
Subacute Sclerosing Panencephalitis	1/32	0.0829412	0.572033	0	0	11.5741	28.8151	CD38
MICROPHTHALMIA, SYNDROMIC 7	1/32	0.0829412	0.572434	0	0	11.5741	28.8151	MET
Grade I Astrocytoma	1/32	0.0829412	0.572837	0	0	11.5741	28.8151	MET
Gastrinoma	1/32	0.0829412	0.57324	0	0	11.5741	28.8151	MET
Epilepsy, Rolandic	1/32	0.0829412	0.573643	0	0	11.5741	28.8151	GRIN2A
Fibrillation	1/32	0.0829412	0.574047	0	0	11.5741	28.8151	SOD1
Dyschezia	2/178	0.083471	0.570879	0	0	4.16146	10.334	NRXN1;GABRA3
Myasthenia Gravis	2/179	0.0842727	0.575961	0	0	4.13822	10.2367	NTRK1;MAPK3
Gastric Adenocarcinoma	3/383	0.0846376	0.578053	0	0	2.90107	7.16384	PPP1R1B;HRAS;MET
Precursor Cell Lymphoblastic Leukemia Lymphoma	4/618	0.0852076	0.581542	0	0	2.39722	5.90355	SNAP25;DNER;CD38;MET
Delusions	1/33	0.0854213	0.578182	0	0	11.2233	27.6112	DRD2
Periapical Periodontitis	1/33	0.0854213	0.57858	0	0	11.2233	27.6112	MAPK3
Corneal Ulcer	1/33	0.0854213	0.578979	0	0	11.2233	27.6112	NTRK1
Osteomalacia	1/33	0.0854213	0.579379	0	0	11.2233	27.6112	AP2S1
Meniere Disease	1/33	0.0854213	0.579779	0	0	11.2233	27.6112	GPX1
Albuminuria	1/33	0.0854213	0.58018	0	0	11.2233	27.6112	CD38
Infantile Severe Myoclonic Epilepsy	1/33	0.0854213	0.580581	0	0	11.2233	27.6112	SCN1A
Hypoplastic toenails	1/33	0.0854213	0.580983	0	0	11.2233	27.6112	HRAS
Trigeminal Neuralgia	1/33	0.0854213	0.581385	0	0	11.2233	27.6112	MAPK3
Abnormal dermatoglyphic pattern	1/33	0.0854213	0.581788	0	0	11.2233	27.6112	HRAS
Harlequin Fetus	1/33	0.0854213	0.582192	0	0	11.2233	27.6112	CD38
Spastic	1/33	0.0854213	0.582596	0	0	11.2233	27.6112	SOD1
Gastritis	2/181	0.0858833	0.580909	0	0	4.09249	10.0461	MBD3;MET
Primary Myelofibrosis	2/182	0.0866921	0.585574	0	0	4.07	9.95276	TET2;SF3B1
Respiratory Insufficiency	2/182	0.0866921	0.585977	0	0	4.07	9.95276	SNAP25;TET2
Malignant neoplasm of urinary bladder	6/1144	0.0867999	0.585899	0	0	1.9425	4.74777	NTRK1;SNAP25;GPX1;HRAS;MET;MAPK3
oligodendroglioma	2/183	0.0875033	0.590242	0	0	4.04776	9.86067	MET;SYN1
Dysautonomia	1/34	0.0878947	0.589644	0	0	10.8932	26.4882	NTRK1
Prolonged bleeding time	1/34	0.0878947	0.590047	0	0	10.8932	26.4882	TET2
Poor suck	1/34	0.0878947	0.590451	0	0	10.8932	26.4882	HRAS
Generalized Anxiety Disorder	1/34	0.0878947	0.590854	0	0	10.8932	26.4882	DRD2
Female infertility	1/34	0.0878947	0.591259	0	0	10.8932	26.4882	MAPK3
Rhabdoid Tumor of the Kidney	1/34	0.0878947	0.591664	0	0	10.8932	26.4882	MET
Renal interstitial fibrosis	1/34	0.0878947	0.592069	0	0	10.8932	26.4882	ADORA2A
Amyotrophic Lateral Sclerosis, Guam Form	1/34	0.0878947	0.592475	0	0	10.8932	26.4882	SOD1
Proteinuria	2/184	0.0883168	0.592072	0	0	4.02576	9.76983	ACTN4;SOD1
MIXED LINEAGE LEUKEMIA	2/185	0.0891325	0.59632	0	0	4.004	9.6802	CD38;MET
Adrenocortical carcinoma	2/185	0.0891325	0.596726	0	0	4.004	9.6802	HRAS;MET
Respiratory Failure	2/185	0.0891325	0.597133	0	0	4.004	9.6802	HRAS;SOD1
Lung diseases	3/393	0.0897937	0.600335	0	0	2.82725	6.81436	GPX1;ADORA2A;MAPK3
Hashimoto Disease	2/186	0.0899506	0.600975	0	0	3.98248	9.59178	MET;MAPK3
Pre-renal acute kidney injury	1/35	0.0903616	0.60005	0	0	10.582	25.4385	SOD1
Complete trisomy 18 syndrome	1/35	0.0903616	0.600455	0	0	10.582	25.4385	CD38
Juvenile Myoclonic Epilepsy	1/35	0.0903616	0.600862	0	0	10.582	25.4385	SCN1A
Ventricular Fibrillation	1/35	0.0903616	0.601269	0	0	10.582	25.4385	MET
HTLV-I Infections	1/35	0.0903616	0.601676	0	0	10.582	25.4385	LRP1
Hereditary Melanoma	1/35	0.0903616	0.602084	0	0	10.582	25.4385	HRAS
Hepatitis B Virus-Related Hepatocellular Carcinoma	1/35	0.0903616	0.602492	0	0	10.582	25.4385	MAPK3
Follicular neoplasm	1/35	0.0903616	0.602901	0	0	10.582	25.4385	HRAS
Gait, Drop Foot	1/35	0.0903616	0.603311	0	0	10.582	25.4385	SOD1
Triple Negative Breast Neoplasms	4/632	0.0907314	0.602099	0	0	2.34412	5.62553	NTRK1;DNER;MET;MAPK3
Hypoplasia of corpus callosum	2/187	0.0907709	0.601954	0	0	3.96118	9.50452	CHMP1A;AHDC1
Dyspnea	2/188	0.0915935	0.606591	0	0	3.94011	9.41842	ETFB;SOD1
Acquired Immunodeficiency Syndrome	2/188	0.0915935	0.607	0	0	3.94011	9.41842	LRP1;CD38
Carcinoma of bladder	6/1162	0.091934	0.608436	0	0	1.91241	4.56432	NTRK1;SNAP25;GPX1;HRAS;MET;MAPK3
Liver carcinoma	14/3593	0.0926229	0.612582	0	0	1.44314	3.43354	CX3CR1;NTRK1;SNAP25;GPX1;LRP1;GABRA3;ACTN4;PPP1R9B;SOD1;GRIN2A;HRAS;MET;SF3B1;MAPK3
Esophageal Neoplasms	4/637	0.0927457	0.612983	0	0	2.32572	5.53031	CD38;HRAS;MET;MAPK3
Paranoid Schizophrenia	1/36	0.0928219	0.609795	0	0	10.2881	24.4555	DPYSL2
Ocular Hypertension	1/36	0.0928219	0.610203	0	0	10.2881	24.4555	SOD1
Low Tension Glaucoma	1/36	0.0928219	0.610612	0	0	10.2881	24.4555	SOD1
Inflammatory Myofibroblastic Tumor	1/36	0.0928219	0.611021	0	0	10.2881	24.4555	NTRK1
Thickened nuchal skin fold	1/36	0.0928219	0.61143	0	0	10.2881	24.4555	HRAS
EAR, PATELLA, SHORT STATURE SYNDROME	1/36	0.0928219	0.61184	0	0	10.2881	24.4555	DRD2
Fatigable weakness of respiratory muscles	1/36	0.0928219	0.612251	0	0	10.2881	24.4555	SOD1
Benign neoplasm of brain, unspecified	1/36	0.0928219	0.612662	0	0	10.2881	24.4555	HRAS
Redundant skin	1/36	0.0928219	0.613074	0	0	10.2881	24.4555	HRAS
Dermatitis	2/190	0.0932453	0.612167	0	0	3.89864	9.2496	CX3CR1;MAPK3
Kidney Diseases	4/639	0.0935575	0.613807	0	0	2.31844	5.49279	CX3CR1;CD38;ACTN4;SOD1
Corpus Luteum Cyst	1/37	0.0952757	0.620523	0	0	10.01	23.5333	NR2F1
Pelvic Organ Prolapse	1/37	0.0952757	0.620935	0	0	10.01	23.5333	GPX1
Cervical intraepithelial neoplasia grade 1	1/37	0.0952757	0.621347	0	0	10.01	23.5333	HRAS
Mitochondrial abnormalities	1/37	0.0952757	0.621759	0	0	10.01	23.5333	SOD1
Bone Marrow Diseases	1/37	0.0952757	0.622172	0	0	10.01	23.5333	CD38
Blood Platelet Disorders	1/37	0.0952757	0.622586	0	0	10.01	23.5333	TET2
Juvenile Pilocytic Astrocytoma	1/37	0.0952757	0.623	0	0	10.01	23.5333	MET
Immunoblastic Large-Cell Lymphoma	1/37	0.0952757	0.623415	0	0	10.01	23.5333	CD38
Tubular Aggregate Myopathy	1/37	0.0952757	0.62383	0	0	10.01	23.5333	MAPK3
Hereditary pyropoikilocytosis	1/37	0.0952757	0.624246	0	0	10.01	23.5333	MAPK3
Fatigable weakness of swallowing muscles	1/37	0.0952757	0.624663	0	0	10.01	23.5333	SOD1
Strabismus	3/404	0.095616	0.622327	0	0	2.75028	6.45604	NRXN1;NR2F1;HRAS
Burkitt Lymphoma	3/407	0.0972306	0.632417	0	0	2.73	6.36274	DNER;CD38;MET
Gait abnormality	2/195	0.0974129	0.633184	0	0	3.79867	8.84633	SBF1;ADCY5
Prominent occiput	1/38	0.097723	0.630198	0	0	9.74659	22.6668	HRAS
Prominent back of the head	1/38	0.097723	0.630612	0	0	9.74659	22.6668	HRAS
Chronic eosinophilic leukemia	1/38	0.097723	0.631026	0	0	9.74659	22.6668	CX3CR1
Neurobehavioral Manifestations	1/38	0.097723	0.631441	0	0	9.74659	22.6668	DRD2
Monoparesis - leg	1/38	0.097723	0.631856	0	0	9.74659	22.6668	GABRA3
Bladder neck obstruction	1/38	0.097723	0.632272	0	0	9.74659	22.6668	MET
Lipoid nephrosis	1/38	0.097723	0.632689	0	0	9.74659	22.6668	ACTN4
Anti-Basement Membrane Glomerulonephritis	1/38	0.097723	0.633106	0	0	9.74659	22.6668	CX3CR1
Keratosis	1/38	0.097723	0.633523	0	0	9.74659	22.6668	HRAS
Hypoplasia of the brainstem	1/38	0.097723	0.633942	0	0	9.74659	22.6668	CHMP1A
Spastic gait	1/38	0.097723	0.63436	0	0	9.74659	22.6668	SOD1
Sensorimotor neuropathy	1/38	0.097723	0.63478	0	0	9.74659	22.6668	SOD1
Precursor T-Cell Lymphoblastic Leukemia-Lymphoma	3/408	0.0977713	0.630096	0	0	2.72331	6.33204	DNER;CD38;HRAS
Profound Mental Retardation	2/196	0.0982528	0.63237	0	0	3.77929	8.76875	NRXN1;SCN1A
Spinal Muscular Atrophy	2/196	0.0982528	0.632784	0	0	3.77929	8.76875	GRIN2A;SOD1
Adenocarcinoma of lung (disorder)	6/1187	0.0993387	0.63894	0	0	1.87213	4.32317	ADORA2A;LRP1;ACTN4;HRAS;MET;SOD1
Congenital clubfoot	2/198	0.0999389	0.64238	0	0	3.74111	8.61652	CHMP1A;HRAS
Disorder of macula of retina	1/39	0.100164	0.639227	0	0	9.49668	21.8514	CX3CR1
Primary malignant neoplasm of brain	1/39	0.100164	0.639642	0	0	9.49668	21.8514	HRAS
Neuronal Ceroid-Lipofuscinoses	1/39	0.100164	0.640058	0	0	9.49668	21.8514	DPYSL2
Alcohol consumption	1/39	0.100164	0.640475	0	0	9.49668	21.8514	NRXN1
Hyperphosphaturia	1/39	0.100164	0.640892	0	0	9.49668	21.8514	MAPK3
Subependymal Giant Cell Astrocytoma	1/39	0.100164	0.641309	0	0	9.49668	21.8514	MET
Streptococcal pneumonia	1/39	0.100164	0.641727	0	0	9.49668	21.8514	MAPK3
Static Tremor	1/39	0.100164	0.642146	0	0	9.49668	21.8514	ADORA2A
heavy drinking	1/39	0.100164	0.642565	0	0	9.49668	21.8514	DRD2
Fasting blood glucose measurement	1/39	0.100164	0.642985	0	0	9.49668	21.8514	ADCY5
Recurrent Brain Neoplasm	1/39	0.100164	0.643405	0	0	9.49668	21.8514	HRAS
Myopathy	3/415	0.101591	0.647915	0	0	2.67738	6.12262	CD38;HRAS;SOD1
Congenital omphalocele	1/40	0.102598	0.650958	0	0	9.25926	21.0827	LRP1
Palpitations	1/40	0.102598	0.651378	0	0	9.25926	21.0827	GABRA3
Chemical Carcinogenesis	1/40	0.102598	0.651799	0	0	9.25926	21.0827	HRAS
Aspirin exacerbated respiratory disease	1/40	0.102598	0.652221	0	0	9.25926	21.0827	DPP10
Abnormal coordination	1/40	0.102598	0.652643	0	0	9.25926	21.0827	ANK2
Neoplasm Recurrence, Local	1/40	0.102598	0.653066	0	0	9.25926	21.0827	TET2
Muscular Dystrophy, Oculopharyngeal	1/40	0.102598	0.653489	0	0	9.25926	21.0827	SOD1
Spinal Cord Diseases	1/40	0.102598	0.653913	0	0	9.25926	21.0827	CD38
Dysphasia	1/41	0.105026	0.661663	0	0	9.03342	20.3573	GRIN2A
Prolymphocytic Leukemia	1/41	0.105026	0.662088	0	0	9.03342	20.3573	CD38
Corneal stromal opacities	1/41	0.105026	0.662513	0	0	9.03342	20.3573	NTRK1
Cloudy cornea	1/41	0.105026	0.662938	0	0	9.03342	20.3573	NTRK1
Monoclonal B-Cell Lymphocytosis	1/41	0.105026	0.663364	0	0	9.03342	20.3573	CD38
MELAS Syndrome	1/41	0.105026	0.663791	0	0	9.03342	20.3573	SOD1
Alcoholic Intoxication	1/41	0.105026	0.664218	0	0	9.03342	20.3573	SNAP25
Irregular hyperpigmentation	1/41	0.105026	0.664646	0	0	9.03342	20.3573	HRAS
Hypoplastic Left Heart Syndrome	1/41	0.105026	0.665074	0	0	9.03342	20.3573	ADCY5
Hemophilia B	1/41	0.105026	0.665503	0	0	9.03342	20.3573	CD38
Human immunodeficiency virus, type 2 [HIV-2] infection in conditions classified elsewhere and of unspecified site	1/41	0.105026	0.665932	0	0	9.03342	20.3573	CD38
Dilated ventricles (finding)	2/204	0.105046	0.660942	0	0	3.63108	8.18213	ATP1A3;HRAS
Papilloma	2/204	0.105046	0.661365	0	0	3.63108	8.18213	NTRK1;HRAS
Cervical Intraepithelial Neoplasia	2/205	0.105904	0.665915	0	0	3.61337	8.11282	HRAS;MET
Language Delay	2/206	0.106764	0.670894	0	0	3.59583	8.04435	GRIN2A;NRXN1
Dystrophic tooth enamel	1/42	0.107447	0.669196	0	0	8.81834	19.6716	HRAS
Drug Allergy	1/42	0.107447	0.669621	0	0	8.81834	19.6716	ADORA2A
Defective tooth enamel	1/42	0.107447	0.670046	0	0	8.81834	19.6716	HRAS
Clear Cell Sarcoma of Soft Tissue	1/42	0.107447	0.670471	0	0	8.81834	19.6716	MET
Cervical intraepithelial neoplasia grade 2	1/42	0.107447	0.670897	0	0	8.81834	19.6716	HRAS
Bulimia Nervosa	1/42	0.107447	0.671324	0	0	8.81834	19.6716	DRD2
Arrhythmogenic Right Ventricular Dysplasia	1/42	0.107447	0.671751	0	0	8.81834	19.6716	MET
Age-Related Memory Disorders	1/42	0.107447	0.672178	0	0	8.81834	19.6716	DRD2
Memory Disorder, Spatial	1/42	0.107447	0.672606	0	0	8.81834	19.6716	DRD2
Memory Disorder, Semantic	1/42	0.107447	0.673035	0	0	8.81834	19.6716	DRD2
Gonadal Dysgenesis	1/42	0.107447	0.673464	0	0	8.81834	19.6716	CD38
Ganglioneuroblastoma	1/42	0.107447	0.673894	0	0	8.81834	19.6716	NTRK1
Ewings sarcoma-primitive neuroectodermal tumor (PNET)	1/42	0.107447	0.674324	0	0	8.81834	19.6716	NTRK1
Epiretinal Membrane	1/42	0.107447	0.674755	0	0	8.81834	19.6716	MET
Polycythemia Vera	2/207	0.107626	0.669886	0	0	3.57846	7.97671	TET2;MET
Malignant neoplasm of esophagus	4/673	0.107877	0.671025	0	0	2.20131	4.90179	LRP1;CD38;HRAS;MET
Constipation	2/208	0.10849	0.673982	0	0	3.56125	7.90989	NRXN1;GABRA3
Colorectal cancer metastatic	2/208	0.10849	0.674408	0	0	3.56125	7.90989	NTRK1;MET
Smoking Behaviors	2/209	0.109356	0.678932	0	0	3.54421	7.84387	NRXN1;CELF4
Dropped beats - heart	1/43	0.109862	0.676944	0	0	8.61326	19.0226	GABRA3
Non-small cell lung cancer metastatic	1/43	0.109862	0.677369	0	0	8.61326	19.0226	MET
Chloracne	1/43	0.109862	0.677794	0	0	8.61326	19.0226	CX3CR1
Myoclonic Epilepsy	1/43	0.109862	0.67822	0	0	8.61326	19.0226	SCN1A
Autoimmune hemolytic anemia	1/43	0.109862	0.678646	0	0	8.61326	19.0226	SOD1
Triploidy syndrome	1/43	0.109862	0.679073	0	0	8.61326	19.0226	NTRK1
Tooth Abnormalities	1/43	0.109862	0.6795	0	0	8.61326	19.0226	HRAS
Macular dystrophy, corneal type 1	1/43	0.109862	0.679928	0	0	8.61326	19.0226	SCN1A
Gemistocytic astrocytoma	1/43	0.109862	0.680357	0	0	8.61326	19.0226	MET
Flushing	1/43	0.109862	0.680786	0	0	8.61326	19.0226	MAPK3
Secondary physiologic amenorrhea	1/43	0.109862	0.681215	0	0	8.61326	19.0226	CD38
Carcinoma of urinary bladder, superficial	1/43	0.109862	0.681645	0	0	8.61326	19.0226	HRAS
Glomerulonephritis	2/210	0.110223	0.678319	0	0	3.52734	7.77864	CX3CR1;NTRK1
Germ cell tumor	2/210	0.110223	0.678744	0	0	3.52734	7.77864	NTRK1;HRAS
Pulmonary Fibrosis	3/432	0.111115	0.683377	0	0	2.57202	5.65121	DNER;MAPK3;SOD1
Pneumococcal Infections	1/44	0.112271	0.683641	0	0	8.41751	18.4078	MAPK3
Peripheral motor neuropathy	1/44	0.112271	0.684065	0	0	8.41751	18.4078	SOD1
Osteosclerosis	1/44	0.112271	0.68449	0	0	8.41751	18.4078	MAPK3
Neurocognitive Disorders	1/44	0.112271	0.684915	0	0	8.41751	18.4078	CD38
Neoplasm of uncertain or unknown behavior of breast	1/44	0.112271	0.68534	0	0	8.41751	18.4078	HRAS
Muscular stiffness	1/44	0.112271	0.685766	0	0	8.41751	18.4078	GABRA3
Mixed anxiety and depressive disorder	1/44	0.112271	0.686192	0	0	8.41751	18.4078	DRD2
Birth Weight	1/44	0.112271	0.686619	0	0	8.41751	18.4078	ADCY5
Memory Disorders	1/44	0.112271	0.687047	0	0	8.41751	18.4078	DRD2
Autonomic nervous system disorders	1/44	0.112271	0.687475	0	0	8.41751	18.4078	NTRK1
Apraxias	1/44	0.112271	0.687904	0	0	8.41751	18.4078	GRIN2A
Linear atrophy	1/44	0.112271	0.688333	0	0	8.41751	18.4078	ANK2
Glycosuria	1/44	0.112271	0.688762	0	0	8.41751	18.4078	ETFB
Liposarcoma, Myxoid	1/44	0.112271	0.689193	0	0	8.41751	18.4078	LRP1
Leprosy, Lepromatous	1/44	0.112271	0.689623	0	0	8.41751	18.4078	LRP1
Ataxia, Truncal	1/44	0.112271	0.690055	0	0	8.41751	18.4078	ATP1A3
Speech Delay	2/213	0.112838	0.686667	0	0	3.47766	7.58757	GRIN2A;NRXN1
Aortic Valve Insufficiency	2/214	0.113713	0.691136	0	0	3.46141	7.52538	MET;MAPK3
Intelligence	2/214	0.113713	0.691564	0	0	3.46141	7.52538	PHF2;TET2
Restenosis	2/215	0.114589	0.696035	0	0	3.44531	7.46391	CX3CR1;GPX1
Endometrial Stromal Sarcoma	1/45	0.114673	0.691839	0	0	8.23045	17.8245	CD38
Purpura	1/45	0.114673	0.692264	0	0	8.23045	17.8245	MET
Delirium	1/45	0.114673	0.692689	0	0	8.23045	17.8245	DRD2
Nicotinamide adenine dinucleotide coenzyme Q reductase deficiency	1/45	0.114673	0.693115	0	0	8.23045	17.8245	SLC25A27
Melanoderma (disorder)	1/45	0.114673	0.693542	0	0	8.23045	17.8245	HRAS
Mammary adenocarcinoma	1/45	0.114673	0.693969	0	0	8.23045	17.8245	HRAS
Lipoatrophy	1/45	0.114673	0.694397	0	0	8.23045	17.8245	CD38
Impulsive character (finding)	1/45	0.114673	0.694825	0	0	8.23045	17.8245	DRD2
Hypopituitarism	1/45	0.114673	0.695253	0	0	8.23045	17.8245	SOD1
Hypoparathyroidism	1/45	0.114673	0.695683	0	0	8.23045	17.8245	AP2S1
Liposarcoma, Dedifferentiated	1/45	0.114673	0.696112	0	0	8.23045	17.8245	MET
Dyslipidemias	2/216	0.115468	0.695355	0	0	3.42936	7.40316	GPX1;LRP1
Alopecia	2/216	0.115468	0.695781	0	0	3.42936	7.40316	HRAS;SOD1
Respiratory syncytial virus (RSV) infection in conditions classified elsewhere and of unspecified site	2/216	0.115468	0.696208	0	0	3.42936	7.40316	CX3CR1;SOD1
Pyloric Stenosis	1/46	0.117069	0.698998	0	0	8.05153	17.2705	HRAS
Drusen	1/46	0.117069	0.699423	0	0	8.05153	17.2705	SOD1
Cutaneous Mastocytosis	1/46	0.117069	0.699849	0	0	8.05153	17.2705	SOD1
Cortical visual impairment	1/46	0.117069	0.700275	0	0	8.05153	17.2705	SCN1A
Obstructive nephropathy	1/46	0.117069	0.700701	0	0	8.05153	17.2705	ADORA2A
Choreoathetoid movements	1/46	0.117069	0.701128	0	0	8.05153	17.2705	ATP1A3
Moyamoya disease 1	1/46	0.117069	0.701556	0	0	8.05153	17.2705	LRP1
Malonic aciduria	1/46	0.117069	0.701984	0	0	8.05153	17.2705	SCN1A
Abnormality of dental enamel	1/46	0.117069	0.702412	0	0	8.05153	17.2705	HRAS
Hypohidrosis	1/46	0.117069	0.702841	0	0	8.05153	17.2705	NTRK1
Hypoalbuminemia	1/46	0.117069	0.703271	0	0	8.05153	17.2705	ACTN4
Systemic candidiasis	1/46	0.117069	0.703701	0	0	8.05153	17.2705	CX3CR1
Dysautonomia, Familial	1/46	0.117069	0.704132	0	0	8.05153	17.2705	NTRK1
Facial asymmetry	1/46	0.117069	0.704563	0	0	8.05153	17.2705	HRAS
Invasive Ductal Breast Carcinoma	2/218	0.11723	0.699539	0	0	3.39789	7.28377	TET2;ACTN4
Neoplasm, Residual	2/220	0.119	0.709667	0	0	3.367	7.16711	TET2;CD38
Muscular Atrophy	1/47	0.119458	0.708958	0	0	7.88022	16.7438	SOD1
Carcinoma in situ of uterine cervix	1/47	0.119458	0.709386	0	0	7.88022	16.7438	HRAS
Lower limb muscle weakness	1/47	0.119458	0.709815	0	0	7.88022	16.7438	GABRA3
Smell Perception	1/47	0.119458	0.710245	0	0	7.88022	16.7438	CHMP1A
Failure to thrive in infancy	1/47	0.119458	0.710675	0	0	7.88022	16.7438	HRAS
Rhinovirus infection	1/47	0.119458	0.711105	0	0	7.88022	16.7438	MAPK3
Carcinoma, Pancreatic Ductal	1/47	0.119458	0.711536	0	0	7.88022	16.7438	ACTN4
Blindness, Cortical	1/47	0.119458	0.711967	0	0	7.88022	16.7438	SCN1A
Pancreatic Ductal Adenocarcinoma	4/701	0.120382	0.714008	0	0	2.11338	4.47422	CX3CR1;NTRK1;DNER;MAPK3
Myocardial Ischemia	3/448	0.120384	0.713592	0	0	2.48016	5.25066	CD38;ANK2;MAPK3
Downward slant of palpebral fissure	2/222	0.120776	0.715484	0	0	3.33667	7.05311	HRAS;AHDC1
Embryonal Neoplasm	1/48	0.121841	0.718329	0	0	7.71605	16.2426	NTRK1
Delayed myelination	1/48	0.121841	0.718761	0	0	7.71605	16.2426	AHDC1
Cytochrome-c Oxidase Deficiency	1/48	0.121841	0.719192	0	0	7.71605	16.2426	SOD1
Paresthesia	1/48	0.121841	0.719624	0	0	7.71605	16.2426	TET2
Neuroblastic tumors	1/48	0.121841	0.720057	0	0	7.71605	16.2426	NTRK1
Alcoholic Steatohepatitis	1/48	0.121841	0.72049	0	0	7.71605	16.2426	SOD1
keratoacanthoma	1/48	0.121841	0.720924	0	0	7.71605	16.2426	HRAS
Infantile Spasm	1/48	0.121841	0.721359	0	0	7.71605	16.2426	SCN1A
Malnutrition	2/225	0.123453	0.72696	0	0	3.29218	6.8869	DRD2;SOD1
Gastrointestinal Carcinoid Tumor	2/225	0.123453	0.727396	0	0	3.29218	6.8869	NTRK1;MAPK3
Chronic schizophrenia	1/49	0.124218	0.727541	0	0	7.55858	15.7651	DRD2
Nervous System Neoplasms	1/49	0.124218	0.727975	0	0	7.55858	15.7651	NTRK1
Neck webbing	1/49	0.124218	0.728409	0	0	7.55858	15.7651	HRAS
Cardiovascular Abnormalities	1/49	0.124218	0.728844	0	0	7.55858	15.7651	CX3CR1
cardiac event	1/49	0.124218	0.729279	0	0	7.55858	15.7651	CX3CR1
Astigmatism	1/49	0.124218	0.729715	0	0	7.55858	15.7651	CHMP1A
Aortic coarctation	1/49	0.124218	0.730152	0	0	7.55858	15.7651	HRAS
Amenorrhea	1/49	0.124218	0.730589	0	0	7.55858	15.7651	DRD2
Abnormality of vision	1/49	0.124218	0.731026	0	0	7.55858	15.7651	HRAS
Coronary Artery Disease	5/981	0.124274	0.727437	0	0	1.88772	3.93639	CX3CR1;GPX1;ADORA2A;LRP1;SOD1
Cholangiocarcinoma	3/455	0.124529	0.728493	0	0	2.442	5.08723	NTRK1;MET;MAPK3
Ki-1+ Anaplastic Large Cell Lymphoma	2/228	0.126145	0.737507	0	0	3.24886	6.72621	NTRK1;MAPK3
Secondary malignant neoplasm of lymph node	6/1271	0.126497	0.739125	0	0	1.7484	3.6149	NTRK1;PPP1R1B;ACTN4;HRAS;MET;MAPK3
Pointed chin	1/50	0.126588	0.733555	0	0	7.40741	15.3097	HRAS
Decreased width of the skull	1/50	0.126588	0.733988	0	0	7.40741	15.3097	HRAS
Childhood onset	1/50	0.126588	0.734422	0	0	7.40741	15.3097	SCN1A
Muscular fasciculation	1/50	0.126588	0.734855	0	0	7.40741	15.3097	SOD1
Carcinosarcoma	1/50	0.126588	0.73529	0	0	7.40741	15.3097	MET
Candidiasis	1/50	0.126588	0.735724	0	0	7.40741	15.3097	CX3CR1
Moyamoya Disease	1/50	0.126588	0.73616	0	0	7.40741	15.3097	LRP1
Biparietal narrowing	1/50	0.126588	0.736596	0	0	7.40741	15.3097	HRAS
Atypical Ductal Breast Hyperplasia	1/50	0.126588	0.737032	0	0	7.40741	15.3097	AP2S1
Varicella zoster	1/50	0.126588	0.737469	0	0	7.40741	15.3097	MAPK3
Hypercalciuria	1/50	0.126588	0.737906	0	0	7.40741	15.3097	AP2S1
stage, prostate cancer	1/50	0.126588	0.738344	0	0	7.40741	15.3097	MET
Sudden Cardiac Death	1/50	0.126588	0.738783	0	0	7.40741	15.3097	ANK2
Giant Cell Tumors	1/50	0.126588	0.739222	0	0	7.40741	15.3097	MET
Seminoma	2/229	0.127045	0.735768	0	0	3.23468	6.67383	NTRK1;HRAS
Ductal Carcinoma	2/230	0.127947	0.740555	0	0	3.22061	6.62203	PPP1R1B;HRAS
Anemia, Sickle Cell	2/231	0.12885	0.745345	0	0	3.20667	6.5708	CD38;DRD2
Radiating pain	1/51	0.128952	0.739408	0	0	7.26216	14.8752	DRD2
Breast Diseases	1/51	0.128952	0.739839	0	0	7.26216	14.8752	HRAS
Metaplasia	1/51	0.128952	0.740271	0	0	7.26216	14.8752	MET
Angioimmunoblastic Lymphadenopathy	1/51	0.128952	0.740704	0	0	7.26216	14.8752	TET2
Ache	1/51	0.128952	0.741137	0	0	7.26216	14.8752	DRD2
Hyperpigmentation	1/51	0.128952	0.741571	0	0	7.26216	14.8752	HRAS
Tachycardia, Ventricular	1/51	0.128952	0.742005	0	0	7.26216	14.8752	MET
Suffering, Physical	1/51	0.128952	0.74244	0	0	7.26216	14.8752	DRD2
Tapering fingers (finding)	1/51	0.128952	0.742875	0	0	7.26216	14.8752	NR2F1
Pain, Splitting	1/51	0.128952	0.743311	0	0	7.26216	14.8752	DRD2
Pain, Migratory	1/51	0.128952	0.743747	0	0	7.26216	14.8752	DRD2
Pain, Crushing	1/51	0.128952	0.744184	0	0	7.26216	14.8752	DRD2
Frequent nosebleeds	1/51	0.128952	0.744621	0	0	7.26216	14.8752	TET2
Cockayne Syndrome, Type I	1/51	0.128952	0.745059	0	0	7.26216	14.8752	MAPK3
Epistaxis	1/51	0.128952	0.745497	0	0	7.26216	14.8752	TET2
Hypoglycemia	2/232	0.129755	0.743145	0	0	3.19285	6.52013	ETFB;HRAS
Hyperlipidemia	2/232	0.129755	0.743578	0	0	3.19285	6.52013	LRP1;ACTN4
Promyelocytic leukemia	2/233	0.130662	0.747901	0	0	3.17914	6.47001	APBB1;SOD1
Endocrine System Diseases	1/52	0.13131	0.748126	0	0	7.12251	14.4601	NTRK1
Drug usage	1/52	0.13131	0.74856	0	0	7.12251	14.4601	DRD2
Progressive visual loss	1/52	0.13131	0.748994	0	0	7.12251	14.4601	ATP1A3
Decreased nerve conduction velocity	1/52	0.13131	0.749429	0	0	7.12251	14.4601	SBF1
Chronic progressive external ophthalmoplegia	1/52	0.13131	0.749865	0	0	7.12251	14.4601	SOD1
Carcinomatosis of peritoneal cavity	1/52	0.13131	0.750301	0	0	7.12251	14.4601	MET
Hoarseness	1/52	0.13131	0.750737	0	0	7.12251	14.4601	HRAS
Hereditary Breast and Ovarian Cancer Syndrome	1/52	0.13131	0.751174	0	0	7.12251	14.4601	HRAS
Microcephaly	2/235	0.13248	0.753914	0	0	3.15209	6.3714	CHMP1A;ATP1A3
Hepatoblastoma	2/235	0.13248	0.754351	0	0	3.15209	6.3714	MET;SF3B1
Polycystic Kidney - body part	1/53	0.133662	0.756263	0	0	6.98812	14.0632	ETFB
Choreoathetosis	1/53	0.133662	0.756699	0	0	6.98812	14.0632	ATP1A3
Myeloid neoplasm	1/53	0.133662	0.757135	0	0	6.98812	14.0632	TET2
Language Disorders	1/53	0.133662	0.757571	0	0	6.98812	14.0632	DRD2
Thrombocytosis	1/53	0.133662	0.758008	0	0	6.98812	14.0632	SF3B1
Tachycardia	1/53	0.133662	0.758446	0	0	6.98812	14.0632	DRD2
Pain, Burning	1/53	0.133662	0.758884	0	0	6.98812	14.0632	DRD2
Hemiplegia/hemiparesis	1/53	0.133662	0.759323	0	0	6.98812	14.0632	SCN1A
granulosa cell tumor	1/53	0.133662	0.759762	0	0	6.98812	14.0632	MAPK3
Rous Sarcoma	1/53	0.133662	0.760202	0	0	6.98812	14.0632	GPX1
Periodontitis	2/237	0.134303	0.759455	0	0	3.12549	6.2749	NTRK1;MET
Endometrial Neoplasms	2/238	0.135217	0.764183	0	0	3.11236	6.22743	HRAS;MET
Lip and Oral Cavity Carcinoma	3/473	0.135423	0.764907	0	0	2.34907	4.69662	GPX1;HRAS;MAPK3
Dizziness	1/54	0.136007	0.765128	0	0	6.85871	13.6835	TET2
Pancreatic Diseases	1/54	0.136007	0.765566	0	0	6.85871	13.6835	HRAS
Cognition	1/54	0.136007	0.766005	0	0	6.85871	13.6835	TET2
Action Tremor	1/54	0.136007	0.766444	0	0	6.85871	13.6835	ADORA2A
Hepatocellular Adenoma	1/54	0.136007	0.766884	0	0	6.85871	13.6835	HRAS
Rotavirus Infections	1/54	0.136007	0.767324	0	0	6.85871	13.6835	MAPK3
Reduced tendon reflexes	1/54	0.136007	0.767765	0	0	6.85871	13.6835	HRAS
Pituitary Diseases	2/240	0.137049	0.77011	0	0	3.08642	6.13399	NTRK1;SOD1
Allergic disposition	2/240	0.137049	0.770551	0	0	3.08642	6.13399	DPP10;MET
Mammary Neoplasms, Human	3/476	0.137271	0.770913	0	0	2.33427	4.63539	GPX1;NR2F1;HRAS
Chondrosarcoma	2/241	0.137968	0.773942	0	0	3.07361	6.08801	MET;MAPK3
Meningioma, benign, no ICD-O subtype	2/241	0.137968	0.774384	0	0	3.07361	6.08801	GPX1;MAPK3
Brugada Syndrome (disorder)	1/55	0.138346	0.771661	0	0	6.73401	13.3198	ANK2
Bone pain	1/55	0.138346	0.772099	0	0	6.73401	13.3198	AP2S1
Atherogenesis	1/55	0.138346	0.772538	0	0	6.73401	13.3198	SOD1
Agnosia for Pain	1/55	0.138346	0.772977	0	0	6.73401	13.3198	DRD2
Adenosquamous carcinoma	1/55	0.138346	0.773417	0	0	6.73401	13.3198	SCN1A
Osteoporosis, Postmenopausal	1/55	0.138346	0.773857	0	0	6.73401	13.3198	MAPK3
Ganglioneuroma	1/55	0.138346	0.774298	0	0	6.73401	13.3198	NTRK1
Epilepsy, Generalized	1/55	0.138346	0.774739	0	0	6.73401	13.3198	SCN1A
Decreased visual acuity, progressive	1/55	0.138346	0.775181	0	0	6.73401	13.3198	ATP1A3
Bone Diseases, Developmental	1/55	0.138346	0.775623	0	0	6.73401	13.3198	HRAS
Progressive sensorineural hearing impairment	1/56	0.140679	0.781568	0	0	6.61376	12.9714	ATP1A3
Pituitary-dependent Cushing's disease	1/56	0.140679	0.782011	0	0	6.61376	12.9714	DRD2
Parathyroid Neoplasms	1/56	0.140679	0.782453	0	0	6.61376	12.9714	SNAP25
Paralysed	1/56	0.140679	0.782896	0	0	6.61376	12.9714	SOD1
Adult Cholangiocarcinoma	1/56	0.140679	0.78334	0	0	6.61376	12.9714	MET
Vertigo	1/56	0.140679	0.783784	0	0	6.61376	12.9714	TET2
Holoprosencephaly	1/56	0.140679	0.784228	0	0	6.61376	12.9714	SOD1
Squamous cell carcinoma of esophagus	5/1023	0.141135	0.783659	0	0	1.81022	3.54447	PPP1R1B;TET2;DRD2;MET;MAPK3
Leukopenia	2/246	0.14258	0.790787	0	0	3.01114	5.86526	HRAS;MET
Gastroesophageal reflux disease	2/246	0.14258	0.791233	0	0	3.01114	5.86526	NRXN1;HRAS
Pneumocystis jiroveci pneumonia	1/57	0.143006	0.790918	0	0	6.49773	12.6372	SOD1
Obsessive compulsive behavior	1/57	0.143006	0.791363	0	0	6.49773	12.6372	DRD2
Necrosis	1/57	0.143006	0.791809	0	0	6.49773	12.6372	SOD1
Carotid Artery Diseases	1/57	0.143006	0.792255	0	0	6.49773	12.6372	LRP1
Hyperaldosteronism	1/57	0.143006	0.792702	0	0	6.49773	12.6372	DRD2
Liver neoplasms	6/1321	0.14426	0.797406	0	0	1.68223	3.25702	DPP10;SNAP25;HRAS;MET;MAPK3;SOD1
Primary malignant neoplasm	5/1032	0.144877	0.800365	0	0	1.79443	3.46661	DNER;DRD2;HRAS;MET;SF3B1
Large cell carcinoma of lung	1/58	0.145326	0.801497	0	0	6.3857	12.3166	HRAS
Intestinal Cancer	1/58	0.145326	0.801947	0	0	6.3857	12.3166	GPX1
Extrapyramidal Disorders	1/58	0.145326	0.802397	0	0	6.3857	12.3166	DRD2
FANCONI ANEMIA, COMPLEMENTATION GROUP A (disorder)	2/249	0.145363	0.80125	0	0	2.97486	5.73708	TET2;SF3B1
Malignant neoplasm of mouth	3/492	0.147272	0.811319	0	0	2.25836	4.32582	GPX1;HRAS;MAPK3
Conn Syndrome	1/59	0.147641	0.810621	0	0	6.27746	12.0086	MAPK3
Chronic lung disease	1/59	0.147641	0.811074	0	0	6.27746	12.0086	NTRK1
Body fluid retention	1/59	0.147641	0.811528	0	0	6.27746	12.0086	ACTN4
Angina Pectoris	1/59	0.147641	0.811982	0	0	6.27746	12.0086	TET2
Waddling gait	1/59	0.147641	0.812437	0	0	6.27746	12.0086	SOD1
Generalized myoclonic seizures	1/59	0.147641	0.812892	0	0	6.27746	12.0086	SCN1A
Dry Eye Syndromes	1/60	0.149949	0.820087	0	0	6.17284	11.7127	SOD1
Cavernous Hemangioma of Brain	1/60	0.149949	0.820544	0	0	6.17284	11.7127	MAPK3
MAJOR AFFECTIVE DISORDER 9	1/60	0.149949	0.821001	0	0	6.17284	11.7127	DRD2
MAJOR AFFECTIVE DISORDER 8	1/60	0.149949	0.821459	0	0	6.17284	11.7127	DRD2
Absence Epilepsy	1/60	0.149949	0.821917	0	0	6.17284	11.7127	SCN1A
Fatty Liver, Alcoholic	1/60	0.149949	0.822376	0	0	6.17284	11.7127	SOD1
AURAL ATRESIA, CONGENITAL	1/60	0.149949	0.822835	0	0	6.17284	11.7127	LRP1
Acute Coronary Syndrome	2/255	0.150964	0.825182	0	0	2.90487	5.49227	CX3CR1;GPX1
Skin Neoplasms	2/256	0.151902	0.829846	0	0	2.89352	5.45289	NTRK1;HRAS
Brain Infarction	1/61	0.152251	0.829446	0	0	6.07165	11.4282	CX3CR1
MAJOR AFFECTIVE DISORDER 7	1/61	0.152251	0.829907	0	0	6.07165	11.4282	DRD2
Viremia	1/61	0.152251	0.830367	0	0	6.07165	11.4282	CD38
MYELOPROLIFERATIVE SYNDROME, TRANSIENT	1/61	0.152251	0.830828	0	0	6.07165	11.4282	MAPK3
Ganglioglioma	1/61	0.152251	0.83129	0	0	6.07165	11.4282	GRIN2A
Nystagmus	3/500	0.152363	0.829137	0	0	2.22222	4.18109	NR2F1;ATP1A3;SCN1A
Renal carcinoma	3/500	0.152363	0.829596	0	0	2.22222	4.18109	NTRK1;MET;MAPK3
Malignant neoplasm of prostate	12/3239	0.153847	0.836748	0	0	1.37217	2.56842	CX3CR1;NTRK1;GPX1;LRP1;TSHZ3;DNER;TET2;HRAS;MET;SF3B1;MAPK3;SOD1
Precursor cell lymphoblastic lymphoma	1/62	0.154547	0.835931	0	0	5.97372	11.1545	CD38
Phyllodes Tumor	1/62	0.154547	0.836391	0	0	5.97372	11.1545	NTRK1
Pemphigus Vulgaris	1/62	0.154547	0.836852	0	0	5.97372	11.1545	MBD3
Osteomyelitis	1/62	0.154547	0.837313	0	0	5.97372	11.1545	NTRK1
Coloboma of iris	1/62	0.154547	0.837775	0	0	5.97372	11.1545	HRAS
Multiple polyps	1/62	0.154547	0.838237	0	0	5.97372	11.1545	HRAS
Macular degeneration	1/62	0.154547	0.8387	0	0	5.97372	11.1545	CX3CR1
Xerostomia	1/62	0.154547	0.839163	0	0	5.97372	11.1545	SOD1
Abnormality of the pinna	1/62	0.154547	0.839627	0	0	5.97372	11.1545	ETFB
Hereditary Malignant Neoplasm	1/62	0.154547	0.840092	0	0	5.97372	11.1545	MET
Difficulty walking	1/63	0.156837	0.844135	0	0	5.87889	10.891	SNAP25
Pallor of optic disc	1/63	0.156837	0.844597	0	0	5.87889	10.891	NR2F1
Neutrophilia (disorder)	1/63	0.156837	0.84506	0	0	5.87889	10.891	MAPK3
Neuro-degenerative disease	1/63	0.156837	0.845524	0	0	5.87889	10.891	SOD1
Monocytic leukemia	1/63	0.156837	0.845988	0	0	5.87889	10.891	MAPK3
Kidney Calculi	1/63	0.156837	0.846453	0	0	5.87889	10.891	SOD1
Lichen Planus, Oral	1/63	0.156837	0.846918	0	0	5.87889	10.891	NTRK1
Inclusion Body Myopathy, Sporadic	1/63	0.156837	0.847383	0	0	5.87889	10.891	SOD1
Simple ear	1/63	0.156837	0.847849	0	0	5.87889	10.891	ETFB
Secondary malignant neoplasm of liver	3/508	0.15751	0.847295	0	0	2.18723	4.04258	NTRK1;MET;MAPK3
Neoplasm Metastasis	14/3920	0.158005	0.849491	0	0	1.32275	2.44065	NTRK1;GPX1;LRP1;GABRA3;TET2;ACTN4;PPP1R9B;DNER;CD38;SBF1;HRAS;MET;SF3B1;MAPK3
Diaphragmatic Hernia	1/64	0.15912	0.851762	0	0	5.78704	10.6371	LRP1
Cytogenetically normal acute myeloid leukemia	1/64	0.15912	0.852226	0	0	5.78704	10.6371	TET2
Nephronophthisis	1/64	0.15912	0.852691	0	0	5.78704	10.6371	ACTN4
Multiple Endocrine Neoplasia Type 2a	1/64	0.15912	0.853156	0	0	5.78704	10.6371	NTRK1
Mitral Valve Prolapse Syndrome	1/64	0.15912	0.853622	0	0	5.78704	10.6371	HRAS
Adult Medulloblastoma	1/64	0.15912	0.854088	0	0	5.78704	10.6371	SNAP25
Febrile Convulsions	1/64	0.15912	0.854554	0	0	5.78704	10.6371	SCN1A
Extrapyramidal sign	1/64	0.15912	0.855022	0	0	5.78704	10.6371	DRD2
Tumor Angiogenesis	3/511	0.159454	0.853085	0	0	2.17439	3.99217	NTRK1;MET;MAPK3
Nasopharyngeal carcinoma	4/782	0.15985	0.854736	0	0	1.89448	3.47356	CD38;HRAS;MET;MAPK3
Melanocytic nevus of skin	1/65	0.161398	0.860206	0	0	5.69801	10.3925	HRAS
Lymphocytosis	1/65	0.161398	0.860673	0	0	5.69801	10.3925	CD38
Hepatic methionine adenosyltransferase deficiency	1/65	0.161398	0.86114	0	0	5.69801	10.3925	MET
Glomerular filtration rate finding	1/65	0.161398	0.861608	0	0	5.69801	10.3925	CHMP1A
HEMOCHROMATOSIS, TYPE 1	1/65	0.161398	0.862076	0	0	5.69801	10.3925	SOD1
FRIEDREICH ATAXIA 1	1/65	0.161398	0.862545	0	0	5.69801	10.3925	GPX1
Diffuse Astrocytoma	1/66	0.16367	0.869014	0	0	5.61167	10.1566	MET
Bronchiolitis	1/66	0.16367	0.869484	0	0	5.61167	10.1566	CX3CR1
Beckwith-Wiedemann Syndrome	1/66	0.16367	0.869954	0	0	5.61167	10.1566	HRAS
GRN-related frontotemporal dementia	1/66	0.16367	0.870425	0	0	5.61167	10.1566	SOD1
Glycogen storage disease type II	1/66	0.16367	0.870896	0	0	5.61167	10.1566	CX3CR1
Giant Cell Tumor of Bone	1/66	0.16367	0.871368	0	0	5.61167	10.1566	GPX1
Skeletal dysplasia	1/66	0.16367	0.87184	0	0	5.61167	10.1566	NTRK1
Cushing Syndrome	1/67	0.165935	0.877252	0	0	5.52792	9.92901	DRD2
Congenital muscular dystrophy (disorder)	1/67	0.165935	0.877724	0	0	5.52792	9.92901	HRAS
Nail dysplasia	1/67	0.165935	0.878196	0	0	5.52792	9.92901	NTRK1
Bipolar I disorder	1/67	0.165935	0.87867	0	0	5.52792	9.92901	DRD2
Aplasia/Hypoplasia of the cerebellum	1/67	0.165935	0.879143	0	0	5.52792	9.92901	HRAS
Toxic Epidermal Necrolysis	1/67	0.165935	0.879617	0	0	5.52792	9.92901	SOD1
Tongue Carcinoma	1/67	0.165935	0.880092	0	0	5.52792	9.92901	ACTN4
Schistosomiasis	1/67	0.165935	0.880567	0	0	5.52792	9.92901	SOD1
Dystrophia unguium	1/68	0.168195	0.886336	0	0	5.44662	9.70933	NTRK1
Leishmaniasis	1/68	0.168195	0.886812	0	0	5.44662	9.70933	MAPK3
Alveolar rhabdomyosarcoma	1/68	0.168195	0.887288	0	0	5.44662	9.70933	MET
Adenomatous polyp of colon	1/68	0.168195	0.887765	0	0	5.44662	9.70933	HRAS
Undifferentiated leukemia	1/68	0.168195	0.888242	0	0	5.44662	9.70933	CD38
Restless Legs Syndrome	1/68	0.168195	0.888719	0	0	5.44662	9.70933	DRD2
Hepatocarcinogenesis	3/527	0.169951	0.895109	0	0	2.10837	3.73655	NTRK1;HRAS;MET
Diabetic Angiopathies	1/69	0.170448	0.893421	0	0	5.36769	9.49717	SOD1
Mucoepidermoid Carcinoma	1/69	0.170448	0.893898	0	0	5.36769	9.49717	MAPK3
Malignant neoplasm of salivary gland	1/69	0.170448	0.894375	0	0	5.36769	9.49717	MET
Kallmann Syndrome	1/69	0.170448	0.894853	0	0	5.36769	9.49717	CD38
Williams Syndrome	1/69	0.170448	0.895332	0	0	5.36769	9.49717	SYN1
hiv-infection/aids	1/69	0.170448	0.89581	0	0	5.36769	9.49717	CX3CR1
Hepatolenticular Degeneration	1/69	0.170448	0.89629	0	0	5.36769	9.49717	GPX1
Optic Atrophy, Hereditary, Leber	1/69	0.170448	0.896769	0	0	5.36769	9.49717	SOD1
Creatinine measurement, serum (procedure)	1/69	0.170448	0.89725	0	0	5.36769	9.49717	CHMP1A
Rectal Carcinoma	2/276	0.170893	0.895278	0	0	2.68384	4.74159	MET;MAPK3
Dwarfism	2/277	0.171854	0.89935	0	0	2.67415	4.70948	HRAS;SOD1
Congenital Heart Defects	2/277	0.171854	0.899829	0	0	2.67415	4.70948	MAPK3;SOD1
Malignant neoplasm of liver	4/805	0.17186	0.898906	0	0	1.84035	3.24099	DPP10;HRAS;MET;MAPK3
Distortion of face	1/70	0.172696	0.899923	0	0	5.29101	9.29219	ETFB
Deformity of face	1/70	0.172696	0.9004	0	0	5.29101	9.29219	ETFB
Cooley's anemia	1/70	0.172696	0.900878	0	0	5.29101	9.29219	CD38
Ovarian adenocarcinoma	1/70	0.172696	0.901356	0	0	5.29101	9.29219	MET
Squamous cell carcinoma of oropharynx	1/70	0.172696	0.901835	0	0	5.29101	9.29219	MET
Funny looking face	1/70	0.172696	0.902315	0	0	5.29101	9.29219	ETFB
Anemia, Diamond-Blackfan	1/70	0.172696	0.902795	0	0	5.29101	9.29219	CD38
Infant, Premature	2/278	0.172815	0.899591	0	0	2.66454	4.67768	NTRK1;SOD1
Essential Hypertension	2/278	0.172815	0.900067	0	0	2.66454	4.67768	GPX1;ADORA2A
Pterygium	1/71	0.174937	0.908233	0	0	5.21648	9.09404	LRP1
Cakut	1/71	0.174937	0.908713	0	0	5.21648	9.09404	TSHZ3
Splenic Marginal Zone B-Cell Lymphoma	1/71	0.174937	0.909193	0	0	5.21648	9.09404	CD38
Rhabdoid Tumor	1/71	0.174937	0.909674	0	0	5.21648	9.09404	SNAP25
Essential Tremor	1/71	0.174937	0.910156	0	0	5.21648	9.09404	SOD1
Rectal Neoplasms	1/72	0.177173	0.915968	0	0	5.14403	8.90241	HRAS
Contact hypersensitivity	1/72	0.177173	0.91645	0	0	5.14403	8.90241	SOD1
Benign melanocytic nevus	1/72	0.177173	0.916933	0	0	5.14403	8.90241	HRAS
MAJOR AFFECTIVE DISORDER 6	1/72	0.177173	0.917416	0	0	5.14403	8.90241	DRD2
MAJOR AFFECTIVE DISORDER 4	1/72	0.177173	0.9179	0	0	5.14403	8.90241	DRD2
Increased fracture rate	1/72	0.177173	0.918384	0	0	5.14403	8.90241	HRAS
Varying degree of multiple fractures	1/72	0.177173	0.918868	0	0	5.14403	8.90241	HRAS
Frequent fractures	1/72	0.177173	0.919354	0	0	5.14403	8.90241	HRAS
Squamous cell carcinoma of lung	2/283	0.177635	0.917875	0	0	2.61746	4.52303	HRAS;MET
Retinoblastoma	3/539	0.177955	0.919044	0	0	2.06143	3.55849	NTRK1;HRAS;SOD1
Neuropathy	2/284	0.178602	0.921901	0	0	2.60824	4.49295	NTRK1;SOD1
Photosensitivity of skin	1/73	0.179403	0.924093	0	0	5.07357	8.71701	SCN1A
Hypopigmentation disorder	1/73	0.179403	0.924577	0	0	5.07357	8.71701	HRAS
Fractures, Multiple	1/73	0.179403	0.925062	0	0	5.07357	8.71701	HRAS
Failure to Thrive	1/73	0.179403	0.925548	0	0	5.07357	8.71701	SOD1
polyps	2/285	0.179569	0.924468	0	0	2.59909	4.46314	DRD2;MAPK3
Lupus Erythematosus, Systemic	5/1113	0.180443	0.928479	0	0	1.66384	2.84906	NTRK1;DNER;CD38;HRAS;SOD1
Metastatic Neoplasm	3/544	0.181322	0.932511	0	0	2.04248	3.48751	ACTN4;MET;MAPK3
Noninfiltrating Intraductal Carcinoma	2/287	0.181507	0.932977	0	0	2.58098	4.40434	TET2;MET
Photoreceptor degeneration	1/74	0.181626	0.931641	0	0	5.00501	8.53756	CX3CR1
Chronic heart failure	1/74	0.181626	0.932127	0	0	5.00501	8.53756	ADORA2A
MAJOR AFFECTIVE DISORDER 1	1/74	0.181626	0.932614	0	0	5.00501	8.53756	DRD2
Hereditary gingival fibromatosis	1/74	0.181626	0.933102	0	0	5.00501	8.53756	MET
Atrial Fibrillation	2/288	0.182477	0.935029	0	0	2.57202	4.37534	ANK2;MAPK3
Anoxia	2/288	0.182477	0.935516	0	0	2.57202	4.37534	CX3CR1;MAPK3
Proliferative diabetic retinopathy	1/75	0.183844	0.939584	0	0	4.93827	8.36379	MAPK3
Congenital Bilateral Cataracts	1/75	0.183844	0.940073	0	0	4.93827	8.36379	ETFB
Ovarian Cysts	1/75	0.183844	0.940562	0	0	4.93827	8.36379	NR2F1
Malignant Fibrous Histiocytoma	1/75	0.183844	0.941052	0	0	4.93827	8.36379	HRAS
Apnea	1/75	0.183844	0.941543	0	0	4.93827	8.36379	ATP1A3
Fanconi Anemia	2/290	0.18442	0.942035	0	0	2.55428	4.31811	TET2;SF3B1
Congenital pectus carinatum	1/76	0.186056	0.947931	0	0	4.87329	8.19545	HRAS
Nonverbal	1/76	0.186056	0.948423	0	0	4.87329	8.19545	CHMP1A
Chest Pain	1/76	0.186056	0.948915	0	0	4.87329	8.19545	TET2
Acute Undifferentiated Leukemia	1/76	0.186056	0.949408	0	0	4.87329	8.19545	CD38
Stable angina	1/76	0.186056	0.949901	0	0	4.87329	8.19545	CX3CR1
Low set ears	2/293	0.187339	0.953974	0	0	2.52813	4.23419	HRAS;AHDC1
Stomach Neoplasms	4/835	0.187996	0.956825	0	0	1.77423	2.96533	PPP1R1B;HRAS;MET;MAPK3
Distal amyotrophy	1/77	0.188262	0.956196	0	0	4.81	8.03232	SOD1
PANIC DISORDER 1	1/77	0.188262	0.956691	0	0	4.81	8.03232	ADORA2A
High-Grade Prostatic Intraepithelial Neoplasia	1/77	0.188262	0.957186	0	0	4.81	8.03232	MET
Neoplastic Syndromes, Hereditary	1/77	0.188262	0.957681	0	0	4.81	8.03232	MET
Pituitary Neoplasms	2/296	0.190266	0.965874	0	0	2.5025	4.15249	NTRK1;DRD2
Electromyogram abnormal	1/78	0.190462	0.962892	0	0	4.74834	7.87418	GABRA3
Pulmonary Embolism	1/78	0.190462	0.963388	0	0	4.74834	7.87418	CX3CR1
Abnormal vision	1/78	0.190462	0.963884	0	0	4.74834	7.87418	SF3B1
Thick lower lip vermilion	1/78	0.190462	0.964381	0	0	4.74834	7.87418	HRAS
Stereotyped Behavior	1/78	0.190462	0.964878	0	0	4.74834	7.87418	SF3B1
Multiple Sclerosis, Relapsing-Remitting	1/78	0.190462	0.965375	0	0	4.74834	7.87418	CX3CR1
Giant Cell Glioblastoma	1/78	0.190462	0.965874	0	0	4.74834	7.87418	MET
Full lower lip	1/78	0.190462	0.966372	0	0	4.74834	7.87418	HRAS
Kidney Failure	2/297	0.191243	0.966341	0	0	2.49408	4.12573	CX3CR1;ACTN4
Distal sensory impairment	1/79	0.192657	0.972985	0	0	4.68823	7.7208	SBF1
Dyslexia	1/80	0.194845	0.982523	0	0	4.62963	7.57199	HRAS
Bloom Syndrome	1/80	0.194845	0.983027	0	0	4.62963	7.57199	SOD1
Abnormality of the fingernails	1/80	0.194845	0.983532	0	0	4.62963	7.57199	HRAS
Acute myelomonocytic leukemia	1/81	0.197028	0.991494	0	0	4.57247	7.42758	CD38
Neoplasms, Experimental	1/81	0.197028	0.992002	0	0	4.57247	7.42758	HRAS
Sensory neuropathy	1/81	0.197028	0.99251	0	0	4.57247	7.42758	SOD1
Reduced fetal movement	1/81	0.197028	0.993019	0	0	4.57247	7.42758	SNAP25
Absent speech	1/82	0.199205	1	0	0	4.51671	7.28737	CHMP1A
Cerebellar Dysmetria	1/82	0.199205	1	0	0	4.51671	7.28737	ATP1A3
Prediabetes syndrome	1/82	0.199205	1	0	0	4.51671	7.28737	HRAS
Serum total cholesterol measurement	2/307	0.20105	1	0	0	2.41284	3.87068	GPX1;LRP1
Full cheeks	1/83	0.201376	1	0	0	4.46229	7.1512	HRAS
Gait Ataxia	1/83	0.201376	1	0	0	4.46229	7.1512	ATP1A3
Testicular Neoplasms	1/83	0.201376	1	0	0	4.46229	7.1512	HRAS
Hyperplasia of cheeks	1/83	0.201376	1	0	0	4.46229	7.1512	HRAS
Hypertrophy of cheeks	1/83	0.201376	1	0	0	4.46229	7.1512	HRAS
Chubby cheeks	1/83	0.201376	1	0	0	4.46229	7.1512	HRAS
Protein Deficiency	1/83	0.201376	1	0	0	4.46229	7.1512	SOD1
Puffy cheeks	1/83	0.201376	1	0	0	4.46229	7.1512	HRAS
Hyperalgesia, Secondary	1/84	0.203541	1	0	0	4.40917	7.01891	MAPK3
Soft Tissue Neoplasms	1/84	0.203541	1	0	0	4.40917	7.01891	MET
Hemochromatosis	1/84	0.203541	1	0	0	4.40917	7.01891	SOD1
Venous Thromboembolism	1/84	0.203541	1	0	0	4.40917	7.01891	LRP1
Kyphoscoliosis deformity of spine	1/84	0.203541	1	0	0	4.40917	7.01891	HRAS
Allodynia	1/84	0.203541	1	0	0	4.40917	7.01891	MAPK3
Chronic sinusitis	1/84	0.203541	1	0	0	4.40917	7.01891	MET
Fibroid Tumor	2/310	0.204004	1	0	0	2.38949	3.79836	DRD2;HRAS
Kidney Failure, Acute	2/310	0.204004	1	0	0	2.38949	3.79836	MET;SOD1
Alzheimer's Disease, Focal Onset	1/85	0.2057	1	0	0	4.3573	6.89035	DPYSL2
Hip Dislocation, Congenital	1/85	0.2057	1	0	0	4.3573	6.89035	CX3CR1
Hyperalgesia, Primary	1/85	0.2057	1	0	0	4.3573	6.89035	MAPK3
Malformations of Cortical Development, Group II	1/85	0.2057	1	0	0	4.3573	6.89035	SCN1A
Hyperopia	1/85	0.2057	1	0	0	4.3573	6.89035	CHMP1A
Increased tendency to bruise	1/85	0.2057	1	0	0	4.3573	6.89035	TET2
Acute Confusional Senile Dementia	1/85	0.2057	1	0	0	4.3573	6.89035	DPYSL2
Celiac Disease	2/312	0.205977	1	0	0	2.37417	3.75117	CD38;SOD1
Acquired Hypogammaglobulinemia	1/86	0.207854	1	0	0	4.30663	6.76537	CD38
Irritation - emotion	1/86	0.207854	1	0	0	4.30663	6.76537	NTRK1
Muscular hypotonia of the trunk	1/86	0.207854	1	0	0	4.30663	6.76537	CHMP1A
Chronic gastritis	1/86	0.207854	1	0	0	4.30663	6.76537	MAPK3
Generalized muscle weakness	1/87	0.210002	1	0	0	4.25713	6.64384	SOD1
Adult type dermatomyositis	1/87	0.210002	1	0	0	4.25713	6.64384	SOD1
Multiple tumors	1/87	0.210002	1	0	0	4.25713	6.64384	MET
Nevus	1/87	0.210002	1	0	0	4.25713	6.64384	HRAS
Contact Dermatitis	1/87	0.210002	1	0	0	4.25713	6.64384	SOD1
DOSAGE-SENSITIVE SEX REVERSAL	1/87	0.210002	1	0	0	4.25713	6.64384	MAPK3
Dysmorphic facies	1/87	0.210002	1	0	0	4.25713	6.64384	ETFB
Brain Tumor, Primary	1/88	0.212144	1	0	0	4.20875	6.52562	HRAS
Iron Overload	1/88	0.212144	1	0	0	4.20875	6.52562	SF3B1
Tactile Allodynia	1/89	0.214281	1	0	0	4.16146	6.4106	MAPK3
Acute Kidney Insufficiency	1/89	0.214281	1	0	0	4.16146	6.4106	SOD1
Wheezing	1/89	0.214281	1	0	0	4.16146	6.4106	DPP10
[truncated: 370 more rows]
