# Supplementary material for: Camk2a-Cre and Tshz3 Expression in Mouse Striatal Cholinergic Interneurons: Implications for Autism Spectrum Disorder
Source: Front Genet. 2021 Jul 12;12:683959. doi: 10.3389/fgene.2021.683959 (PMC8328143; doi:10.3389/fgene.2021.683959)
Supplement: Supplementary file 3 [file Table_3.xlsx]

## Sheet: A. Common Striatum Cortex
ID	Gene Name	mPost-synaptic componenent?
1700003E16Rik	RIKEN cDNA 1700003E16 gene
1700037H04Rik	RIKEN cDNA 1700037H04 gene
1810037I17Rik	RIKEN cDNA 1810037I17 gene
2410006H16Rik	RIKEN cDNA 2410006H16 gene
Abca2	ATP-binding cassette, sub-family A (ABC1), member 2
Abcb9	ATP-binding cassette, sub-family B (MDR/TAP), member 9
Abhd17a	abhydrolase domain containing 17A
Abhd8	abhydrolase domain containing 8
Adora2a	adenosine A2a receptor
Adprh	ADP-ribosylarginine hydrolase
Adra2a	adrenergic receptor, alpha 2a
Agap3	ArfGAP with GTPase domain, ankyrin repeat and PH domain 3	yes
Ahdc1	AT hook, DNA binding motif, containing 1
Alas2	aminolevulinic acid synthase 2, erythroid
Ap2s1	adaptor-related protein complex 2, sigma 1 subunit	yes
Ap5s1	adaptor-related protein 5 complex, sigma 1 subunit
Apoe	apolipoprotein E	yes
Arhgap33	Rho GTPase activating protein 33	yes
Arpc1b	actin related protein 2/3 complex, subunit 1B
Arpp21	cyclic AMP-regulated phosphoprotein, 21
Asphd2	aspartate beta-hydroxylase domain containing 2
Atox1	ATX1 (antioxidant protein 1) homolog 1 (yeast)
Atp5e	ATP synthase, H+ transporting, mitochondrial F1 complex, epsilon subunit
Atp6v0b	ATPase, H+ transporting, lysosomal V0 subunit B	yes
Atp6v1g1	ATPase, H+ transporting, lysosomal V1 subunit G1
Avpi1	arginine vasopressin-induced 1
B9d2	B9 protein domain 2
Bad	BCL2-associated agonist of cell death
Bag6	BCL2-associated athanogene 6
Baiap2	brain-specific angiogenesis inhibitor 1-associated protein 2	yes
Bckdha	branched chain ketoacid dehydrogenase E1, alpha polypeptide
Bmyc	brain expressed myelocytomatosis oncogene
Bola2	bolA-like 2 (E. coli)
Btbd17	BTB (POZ) domain containing 17	yes
C1qc	complement component 1, q subcomponent, C chain
C1qtnf4	C1q and tumor necrosis factor related protein 4	yes
Camk2g	calcium/calmodulin-dependent protein kinase II gamma	yes
Car11	carbonic anhydrase 11
Ccdc124	coiled-coil domain containing 124
Cdc37	cell division cycle 37
Cdh19	cadherin 19, type 2
Cdh6	cadherin 6
Celf4	CUGBP, Elav-like family member 4
Chpf	chondroitin polymerizing factor
Ckb	creatine kinase, brain	yes
Clec18a	C-type lectin domain family 18, member A
Clpp	caseinolytic mitochondrial matrix peptidase proteolytic subunit
Cox17	cytochrome c oxidase assembly protein 17
Cox4i1	cytochrome c oxidase subunit IV isoform 1	yes
Cox6a1	cytochrome c oxidase subunit VIa polypeptide 1
Cox8a	cytochrome c oxidase subunit VIIIa
Crocc	ciliary rootlet coiled-coil, rootletin
Crym	crystallin, mu
Csnk1g2	casein kinase 1, gamma 2
Cst3	cystatin C
Cwc22	CWC22 spliceosome-associated protein homolog (S. cerevisiae)
D8Ertd738e	DNA segment, Chr 8, ERATO Doi 738, expressed
Dctn1	dynactin 1	yes
Dctn3	dynactin 3	yes
Ddah2	dimethylarginine dimethylaminohydrolase 2
Ddr1	discoidin domain receptor family, member 1
Ddt	D-dopachrome tautomerase
Dlgap3	discs, large (Drosophila) homolog-associated protein 3	yes
Dohh	deoxyhypusine hydroxylase/monooxygenase
Dok4	docking protein 4
Dpm3	dolichyl-phosphate mannosyltransferase polypeptide 3
Drd2	dopamine receptor D2
Edf1	endothelial differentiation-related factor 1
Eef2	eukaryotic translation elongation factor 2	yes
Egln2	egl-9 family hypoxia-inducible factor 2
Eif2s3y	eukaryotic translation initiation factor 2, subunit 3, structural gene Y-linked
Eif4h	eukaryotic translation initiation factor 4H
Elob	elongin B
Enho	energy homeostasis associated
Fahd2a	fumarylacetoacetate hydrolase domain containing 2A
Fam227b	family with sequence similarity 227, member B
Fasn	fatty acid synthase
Fau	Finkel-Biskis-Reilly murine sarcoma virus (FBR-MuSV) ubiquitously expressed (fox derived)	yes
Fbl	fibrillarin
Fcgr2b	Fc receptor, IgG, low affinity IIb
Fkbp8	FK506 binding protein 8	yes
Fos	FBJ osteosarcoma oncogene
Fscn1	fascin homolog 1, actin bundling protein (Strongylocentrotus purpuratus)	yes
Gaa	glucosidase, alpha, acid
Galnt18	UDP-N-acetyl-alpha-D-galactosamine:polypeptide N-acetylgalactosaminyltransferase 18
Git1	G protein-coupled receptor kinase-interactor 1	yes
Gm20594	predicted gene, 20594
Gpr37l1	G protein-coupled receptor 37-like 1
Gpr52	G protein-coupled receptor 52
Gpx4	glutathione peroxidase 4	yes
Grcc10	gene rich cluster, C10 gene
Grhpr	glyoxylate reductase/hydroxypyruvate reductase
Grin2a	glutamate receptor, ionotropic, NMDA2A (epsilon 1)	yes
Gt(ROSA)26Sor	gene trap ROSA 26, Philippe Soriano
Hdac5	histone deacetylase 5
Hddc3	HD domain containing 3
Id3	inhibitor of DNA binding 3
Igsf8	immunoglobulin superfamily, member 8	yes
Inf2	inverted formin, FH2 and WH2 domain containing
Ints1	integrator complex subunit 1
Islr2	immunoglobulin superfamily containing leucine-rich repeat 2
Josd2	Josephin domain containing 2
Jph3	junctophilin 3	yes
Junb	jun B proto-oncogene
Kcnj4	potassium inwardly-rectifying channel, subfamily J, member 4
Krtcap2	keratinocyte associated protein 2
Lamb2	laminin, beta 2
Lcn2	lipocalin 2
Lpl	lipoprotein lipase
Lrfn4	leucine rich repeat and fibronectin type III domain containing 4
Lrp1	low density lipoprotein receptor-related protein 1	yes
Lrrc4b	leucine rich repeat containing 4B
Lrrn2	leucine rich repeat protein 2, neuronal
Lrrtm1	leucine rich repeat transmembrane neuronal 1	yes
Mag	myelin-associated glycoprotein	yes
Map1s	microtubule-associated protein 1S
Map2k2	mitogen-activated protein kinase kinase 2
Map3k10	mitogen-activated protein kinase kinase kinase 10
Mbp	myelin basic protein	yes
Mcm6	minichromosome maintenance deficient 6 (MIS5 homolog, S. pombe) (S. cerevisiae)
Met	met proto-oncogene
Metrn	meteorin, glial cell differentiation regulator
Mid1ip1	Mid1 interacting protein 1 (gastrulation specific G12-like (zebrafish))
Mrpl20	mitochondrial ribosomal protein L20
Mrpl53	mitochondrial ribosomal protein L53
Mrpl54	mitochondrial ribosomal protein L54
Mt2	metallothionein 2
Ncor2	nuclear receptor co-repressor 2
Ndufa13	NADH dehydrogenase (ubiquinone) 1 alpha subcomplex, 13	yes
Ndufa2	NADH dehydrogenase (ubiquinone) 1 alpha subcomplex, 2	yes
Ndufa7	NADH dehydrogenase (ubiquinone) 1 alpha subcomplex, 7 (B14.5a)	yes
Ndufa8	NADH dehydrogenase (ubiquinone) 1 alpha subcomplex, 8	yes
Ndufb10	NADH dehydrogenase (ubiquinone) 1 beta subcomplex, 10	yes
Ndufb11	NADH dehydrogenase (ubiquinone) 1 beta subcomplex, 11	yes
Ndufb6	NADH dehydrogenase (ubiquinone) 1 beta subcomplex, 6	yes
Ndufb7	NADH dehydrogenase (ubiquinone) 1 beta subcomplex, 7	yes
Ndufb8	NADH dehydrogenase (ubiquinone) 1 beta subcomplex 8	yes
Ndufc2	NADH dehydrogenase (ubiquinone) 1, subcomplex unknown, 2
Ndufs7	NADH dehydrogenase (ubiquinone) Fe-S protein 7	yes
Ndufv1	NADH dehydrogenase (ubiquinone) flavoprotein 1	yes
Nisch	nischarin
Nme2	NME/NM23 nucleoside diphosphate kinase 2
Nme3	NME/NM23 nucleoside diphosphate kinase 3
Nos1ap	nitric oxide synthase 1 (neuronal) adaptor protein
Palm	paralemmin	yes
Pcdhgc3	protocadherin gamma subfamily C, 3
Pcsk1n	proprotein convertase subtilisin/kexin type 1 inhibitor
Pcx	pyruvate carboxylase
Pdlim2	PDZ and LIM domain 2
Penk	preproenkephalin
Pex6	peroxisomal biogenesis factor 6
Pfdn5	prefoldin 5
Phf2	PHD finger protein 2
Pigyl	phosphatidylinositol glycan anchor biosynthesis, class Y-like
Pin1	protein (peptidyl-prolyl cis/trans isomerase) NIMA-interacting 1
Pitpnm1	phosphatidylinositol transfer protein, membrane-associated 1	yes
Pitpnm2	phosphatidylinositol transfer protein, membrane-associated 2	yes
Pkig	protein kinase inhibitor, gamma
Plec	plectin	yes
Plk5	polo-like kinase 5
Polr2e	polymerase (RNA) II (DNA directed) polypeptide E
Ppib	peptidylprolyl isomerase B	yes
Ppp1r16a	protein phosphatase 1, regulatory (inhibitor) subunit 16A
Ppp1r1b	protein phosphatase 1, regulatory (inhibitor) subunit 1B	yes
Prdx5	peroxiredoxin 5	yes
Prr7	proline rich 7 (synaptic)	yes
Prrc2a	proline-rich coiled-coil 2A
Ptprk	protein tyrosine phosphatase, receptor type, K
Qrfpr	pyroglutamylated RFamide peptide receptor
Rab5c	RAB5C, member RAS oncogene family	yes
Rcc2	regulator of chromosome condensation 2
Rex1bd	required for excision 1-B domain containing
Rgs14	regulator of G-protein signaling 14
Rnasek	ribonuclease, RNase K
Romo1	reactive oxygen species modulator 1
Rpl13a	ribosomal protein L13A	yes
Rpl8	ribosomal protein L8	yes
Rplp0	ribosomal protein, large, P0	yes
Rplp1	ribosomal protein, large, P1
Rplp2	ribosomal protein, large P2	yes
Rprml	reprimo-like
Rps21	ribosomal protein S21
Rps26	ribosomal protein S26	yes
Rps5	ribosomal protein S5	yes
Rxrg	retinoid X receptor gamma
Scaf1	SR-related CTD-associated factor 1
Selenoh	selenoprotein H
Selenom	selenoprotein M
Serpina9	serine (or cysteine) peptidase inhibitor, clade A (alpha-1 antiproteinase, antitrypsin), member 9
Sf3b5	splicing factor 3b, subunit 5
Sgta	small glutamine-rich tetratricopeptide repeat (TPR)-containing, alpha
Sh3gl2	SH3-domain GRB2-like 2	yes
Slc12a9	solute carrier family 12 (potassium/chloride transporters), member 9
Slc4a3	solute carrier family 4 (anion exchanger), member 3
Slc6a7	solute carrier family 6 (neurotransmitter transporter, L-proline), member 7
Smim12	small integral membrane protein 12
Snhg8	small nucleolar RNA host gene 8
Snrk	SNF related kinase
Snrpb	small nuclear ribonucleoprotein B
Sod1	superoxide dismutase 1, soluble
Sphk2	sphingosine kinase 2
Spns1	spinster homolog 1
Sptbn2	spectrin beta, non-erythrocytic 2
Srebf1	sterol regulatory element binding transcription factor 1
Ssbp4	single stranded DNA binding protein 4
Stmn3	stathmin-like 3
Syndig1l	synapse differentiation inducing 1 like
Szrd1	SUZ RNA binding domain containing 1
Tac1	tachykinin 1
Taldo1	transaldolase 1
Tceal5	transcription elongation factor A (SII)-like 5
Timm13	translocase of inner mitochondrial membrane 13	yes
Tkt	transketolase
Tmem119	transmembrane protein 119
Tmem143	transmembrane protein 143
Tnk2	tyrosine kinase, non-receptor, 2
Tnrc18	trinucleotide repeat containing 18
Tomm6	translocase of outer mitochondrial membrane 6 homolog (yeast)
Tpgs1	tubulin polyglutamylase complex subunit 1
Tppp3	tubulin polymerization-promoting protein family member 3
Tsc22d4	TSC22 domain family, member 4
Tshz3	teashirt zinc finger family member 3
Tubb3	tubulin, beta 3 class III	yes
Tubb4a	tubulin, beta 4A class IVA
Uchl1	ubiquitin carboxy-terminal hydrolase L1	yes
Uqcc2	ubiquinol-cytochrome c reductase complex assembly factor 2
Uqcr11	ubiquinol-cytochrome c reductase, complex III subunit XI
Uqcrq	ubiquinol-cytochrome c reductase, complex III subunit VII
Vat1l	vesicle amine transport protein 1 homolog-like (T. californica)
Vgf	VGF nerve growth factor inducible
Zbtb17	zinc finger and BTB domain containing 17
Zfp428	zinc finger protein 428
Zfp523	zinc finger protein 523
Zmiz2	zinc finger, MIZ-type containing 2
Znhit1	zinc finger, HIT domain containing 1

## Sheet: B. 196 genes
Genes regulated in opposite direction in the striatum and cerebral cortex
1700003E16Rik
1700037H04Rik
1810037I17Rik
2410006H16Rik
Abca2
Abcb9
Abhd17a
Abhd8
Adprh
Agap3
Ahdc1
Ap2s1
Apoe
Arhgap33
Arpc1b
Asphd2
Atox1
Atp5e
Atp6v0b
Atp6v1g1
Avpi1
B9d2
Bad
Bag6
Baiap2
Bckdha
Bmyc
Bola2
Btbd17
C1qc
C1qtnf4
Car11
Ccdc124
Cdc37
Celf4
Chpf
Ckb
Clpp
Cox17
Cox4i1
Cox6a1
Cox8a
Crocc
Csnk1g2
Cst3
D8Ertd738e
Dctn1
Dctn3
Ddah2
Ddr1
Ddt
Dlgap3
Dohh
Dok4
Dpm3
Edf1
Eef2
Egln2
Eif4h
Elob
Enho
Fasn
Fau
Fbl
Fkbp8
Fos
Fscn1
Gaa
Galnt18
Git1
Gm20594
Gpr37l1
Gpx4
Grcc10
Grhpr
Hdac5
Id3
Igsf8
Inf2
Ints1
Islr2
Josd2
Jph3
Junb
Kcnj4
Krtcap2
Lamb2
Lrfn4
Lrp1
Lrrc4b
Lrrn2
Lrrtm1
Mag
Map1s
Map2k2
Map3k10
Mbp
Metrn
Mid1ip1
Mrpl20
Mrpl53
Mrpl54
Mt2
Ncor2
Ndufa13
Ndufa2
Ndufa7
Ndufa8
Ndufb10
Ndufb11
Ndufb6
Ndufb7
Ndufb8
Ndufc2
Ndufs7
Ndufv1
Nisch
Nme2
Nme3
Palm
Pcdhgc3
Pcsk1n
Pcx
Pdlim2
Pex6
Phf2
Pigyl
Pin1
Pitpnm1
Pitpnm2
Pkig
Plec
Plk5
Polr2e
Ppib
Ppp1r16a
Prdx5
Prr7
Prrc2a
Rab5c
Rcc2
Rex1bd
Rgs14
Rnasek
Romo1
Rpl13a
Rpl8
Rplp0
Rplp1
Rplp2
Rprml
Rps21
Rps26
Rps5
Scaf1
Selenoh
Selenom
Sf3b5
Sgta
Slc12a9
Slc4a3
Smim12
Snhg8
Snrk
Snrpb
Sod1
Sphk2
Spns1
Sptbn2
Srebf1
Ssbp4
Stmn3
Szrd1
Taldo1
Timm13
Tkt
Tmem119
Tmem143
Tnk2
Tnrc18
Tomm6
Tpgs1
Tppp3
Tsc22d4
Tubb3
Tubb4a
Uchl1
Uqcc2
Uqcr11
Uqcrq
Vgf
Zbtb17
Zfp428
Zfp523
Zmiz2
Znhit1

## Sheet: C. Human Orthologues
query	entrezgene	name	symbol	alias	taxid	MGI
ABCA2	11305	ATP-binding cassette, sub-family A (ABC1), member 2	Abca2	AI413825, Abc, Abc2, D2H0S1474, D2H0S1474E	10090	MGI:99606
ABCB9	56325	ATP-binding cassette, sub-family B (MDR/TAP), member 9	Abcb9	T, TAPL, mKIAA1520	10090	MGI:1861729
ABHD17A	216169	abhydrolase domain containing 17A	Abhd17a	1700013O15Rik, BC005632, D10Bwg1364e, Fam10, Fam108a	10090	MGI:106388
ABHD8	64296	abhydrolase domain containing 8	Abhd8	0910001L24Rik, AB030191	10090	MGI:1918946
ADORA2A	11540	adenosine A2a receptor	Adora2a	A, A2AAR, A2aR, AA2AR, ARA2A	10090	MGI:99402
ADPRH	11544	ADP-ribosylarginine hydrolase	Adprh	Ar, Arh1	10090	MGI:1098234
ADRA2A	11551	adrenergic receptor, alpha 2a	Adra2a	AW122659, Adr, Adra-2, Adra-2a, al	10090	MGI:87934
AGAP3	213990	ArfGAP with GTPase domain, ankyrin repeat and PH domain 3	Agap3	AGAP-3, AV028425, Centg, Centg3, Cr	10090	MGI:2183446
AHDC1	230793	AT hook, DNA binding motif, containing 1	Ahdc1	D030015G18Rik	10090	MGI:2444218
ALAS2	11656	aminolevulinic acid synthase 2, erythroid	Alas2	A, ALAS, ALAS-E, ALASE, Al	10090	MGI:87990
AP2S1	232910	adaptor-related protein complex 2, sigma 1 subunit	Ap2s1	AI043088	10090	MGI:2141861
AP5S1	69596	adaptor-related protein 5 complex, sigma 1 subunit	Ap5s1	0610038L13Rik, 2310035K24Rik, AW060727, sigma5	10090	MGI:1916846
APOE	11816	apolipoprotein E	Apoe	A, AI255918, Apo-E	10090	MGI:88057
ARHGAP33	233071	Rho GTPase activating protein 33	Arhgap33	AW324378, NOM, NOMA-GAP, Snx, Snx26	10090	MGI:2673998
ARPC1B	11867	actin related protein 2/3 complex, subunit 1B	Arpc1b	41kDa, AA408064, AA408534, AA571392, AF007010	10090	MGI:1343142
ARPP21	74100	cyclic AMP-regulated phosphoprotein, 21	Arpp21	0710001E13Rik, AI853636, ARP, ARPP-21, D9Bwg1012e	10090	MGI:107562
ASPHD2	72898	aspartate beta-hydroxylase domain containing 2	Asphd2	2900006N09Rik, 9230106G13Rik	10090	MGI:1920148
ATOX1	11927	antioxidant 1 copper chaperone	Atox1	AI256639, ATX, Atx1	10090	MGI:1333855
ATP5E	67126	ATP synthase, H+ transporting, mitochondrial F1 complex, epsilon subunit	Atp5e	2410043G19Rik, ATPE, AV000645, Atp5f1e	10090	MGI:1855697
ATP6V0B	114143	ATPase, H+ transporting, lysosomal V0 subunit B	Atp6v0b	2310024H13Rik, Atp, Atp6f, VMA, VMA16	10090	MGI:1890510
ATP6V1G1	66290	ATPase, H+ transporting, lysosomal V1 subunit G1	Atp6v1g1	1810024D14Rik, AA960677, ATP, ATP6J, Atp6	10090	MGI:1913540
AVPI1	69534	arginine vasopressin-induced 1	Avpi1	2310008N12Rik, AA410041, VIT32, esu, mVIT	10090	MGI:1916784
B9D2	232987	B9 protein domain 2	B9d2	stum, stumpy	10090	MGI:2387643
BAD	12015	BCL2-associated agonist of cell death	Bad	AI325008, Bbc2	10090	MGI:1096330
BAG6	224727	BCL2-associated athanogene 6	Bag6	2410045D21Rik, AA408914, BAG-6, Bat, Bat3	10090	MGI:1919439
BAIAP2	108100	brain-specific angiogenesis inhibitor 1-associated protein 2	Baiap2	IR, IRSp53, R75030	10090	MGI:2137336
BCKDHA	12039	branched chain ketoacid dehydrogenase E1, alpha polypeptide	Bckdha		10090	MGI:107701
BMYC	107771	brain expressed myelocytomatosis oncogene	Bmyc	2900002K07Rik, AW060705, Mycb	10090	MGI:88184
BOLA2	66162	bolA-like 2 (E. coli)	Bola2	1110025L05Rik, BolA-2	10090	MGI:1913412
BTBD17	72014	BTB (POZ) domain containing 17	Btbd17	1500005I02Rik, Tang, Tango10a	10090	MGI:1919264
C1QC	12262	complement component 1, q subcomponent, C chain	C1qc	AI385742, Adib, C1qg, Ciqc	10090	MGI:88225
C1QTNF4	67445	C1q and tumor necrosis factor related protein 4	C1qtnf4	0710001E10Rik, 9430004J15Rik, Adin, CTR, CTRP4	10090	MGI:1914695
CAMK2G	12325	calcium/calmodulin-dependent protein kinase II gamma	Camk2g	Camk, Camkg	10090	MGI:88259
CAR11	12348	carbonic anhydrase 11	Car11	Ca11	10090	MGI:1336193
CCDC124	234388	coiled-coil domain containing 124	Ccdc124	1810023B24Rik	10090	MGI:1916403
CDC37	12539	cell division cycle 37	Cdc37	p50, p50Cdc3, p50Cdc37	10090	MGI:109531
CDH19	227485	cadherin 19, type 2	Cdh19		10090	MGI:3588198
CDH6	12563	cadherin 6	Cdh6	K-cadh, cad, cad6	10090	MGI:107435
CELF4	108013	CUGBP, Elav-like family member 4	Celf4	A230070D14Rik, BRUN, BRUNOL-4, Bru, Brul4	10090	MGI:1932407
CHPF	74241	chondroitin polymerizing factor	Chpf	1700028N03Rik, AI414328, D1Bwg1363e	10090	MGI:106576
CKB	12709	creatine kinase, brain	Ckb	B-CK, Bck, CPK-B, Ck-3, Ck3	10090	MGI:88407
CLEC18A	353287	C-type lectin domain family 18, member A	Clec18a	Mr, Mrcl	10090	MGI:2672935
CLPP	53895	caseinolytic mitochondrial matrix peptidase proteolytic subunit	Clpp	AU019820, D17Wsu160, D17Wsu160e	10090	MGI:1858213
COX17	12856	cytochrome c oxidase assembly protein 17, copper chaperone	Cox17	AI037035, COX1	10090	MGI:1333806
COX4I1	12857	cytochrome c oxidase subunit 4I1	Cox4i1	AL024441, CO, COX, COX IV-1, COXIV	10090	MGI:88473
COX6A1	12861	cytochrome c oxidase subunit 6A1	Cox6a1	VIaL	10090	MGI:103099
COX8A	12868	cytochrome c oxidase subunit 8A	Cox8a	COX, COX8L	10090	MGI:105959
CROCC	230872	ciliary rootlet coiled-coil, rootletin	Crocc		10090	MGI:3529431
CRYM	12971	crystallin, mu	Crym		10090	MGI:102675
CSNK1G2	103236	casein kinase 1, gamma 2	Csnk1g2	2810429I12Rik, AI463719	10090	MGI:1920014
CST3	13010	cystatin C	Cst3	Cys, CysC	10090	MGI:102519
CWC22	80744	CWC22 spliceosome-associated protein	Cwc22	AA684037, AI173004, AL022752, B230213M24, mKIAA1604	10090	MGI:2136773
D8ERTD738E	101966	DNA segment, Chr 8, ERATO Doi 738, expressed	D8Ertd738e	AA589584	10090	MGI:1289231
DCTN1	13191	dynactin 1	Dctn1	AL022633, DAP-150, DP-150, Glue, Glued	10090	MGI:107745
DCTN3	53598	dynactin 3	Dctn3	p2, p24	10090	MGI:1859251
DDAH2	51793	dimethylarginine dimethylaminohydrolase 2	Ddah2	1110003M04Rik, AU019324, AW413173, DDAH-2, DDAHII	10090	MGI:1859016
DDR1	12305	discoidin domain receptor family, member 1	Ddr1	6030432F18, AI323681, CD167, CD167a, Ca	10090	MGI:99216
DDT	13202	D-dopachrome tautomerase	Ddt	C78655	10090	MGI:1298381
DLGAP3	242667	DLG associated protein 3	Dlgap3	BC058433, DA, DAP-3, DAP3, P	10090	MGI:3039563
DOHH	102115	deoxyhypusine hydroxylase/monooxygenase	Dohh	1110033C18Rik, AI585913, AL022869, Hlr, Hlrc1	10090	MGI:1915964
DOK4	114255	docking protein 4	Dok4		10090	MGI:2148865
DPM3	68563	dolichyl-phosphate mannosyltransferase polypeptide 3	Dpm3	1110001H19Rik, AV117483	10090	MGI:1915813
DRD2	13489	dopamine receptor D2	Drd2	D2, D2R, Drd-, Drd-2	10090	MGI:94924
EDF1	59022	endothelial differentiation-related factor 1	Edf1	0610008L11Rik, AA409425, MBF1	10090	MGI:1891227
EEF2	13629	eukaryotic translation elongation factor 2	Eef2	Ef-2	10090	MGI:95288
EGLN2	112406	egl-9 family hypoxia-inducible factor 2	Egln2	0610011A13Rik, C85656, Hif-p4h, Hif-p4h-1, Ie	10090	MGI:1932287
EIF2S3Y	26908	eukaryotic translation initiation factor 2, subunit 3, structural gene Y-linked	Eif2s3y	Eif-2g, Eif-2gy, S, Spy, Tfy	10090	MGI:1349430
EIF4H	22384	eukaryotic translation initiation factor 4H	Eif4h	AU018978, D5Ertd355, D5Ertd355e, E430026L18Rik, Ef4h	10090	MGI:1341822
ELOB	67673	elongin B	Elob	0610040H15Rik, Tceb2	10090	MGI:1914923
ENHO	69638	energy homeostasis associated	Enho	1110065P19Rik, 2310040A07Rik, A	10090	MGI:1916888
FAHD2A	68126	fumarylacetoacetate hydrolase domain containing 2A	Fahd2a	1500003K14Rik, B430104H02Rik, Cgi-105, Fahd2	10090	MGI:1915376
FAM227B	75823	family with sequence similarity 227, member B	Fam227b	4930525F21Rik	10090	MGI:1923073
FASN	14104	fatty acid synthase	Fasn	A630082H08Rik, F, FAS	10090	MGI:95485
FAU	14109	Finkel-Biskis-Reilly murine sarcoma virus (FBR-MuSV) ubiquitously expressed (fox derived)	Fau	MNSFb, MNSFbeta	10090	MGI:102547
FBL	14113	fibrillarin	Fbl	AL022665, FIB, FLRN, RNU, RNU3IP1	10090	MGI:95486
FCGR2B	14130	Fc receptor, IgG, low affinity IIb	Fcgr2b	AI528646, CD32, F630109E10Rik, Fc[g], Fc[g]RII	10090	MGI:95499
FKBP8	14232	FK506 binding protein 8	Fkbp8	38kD, 38kDa, FKBP-38, FKBP-8, FKBPR38	10090	MGI:1341070
FOS	14281	FBJ osteosarcoma oncogene	Fos	D12Rfj, D12Rfj1, c-f, c-fos, cF	10090	MGI:95574
FSCN1	14086	fascin actin-bundling protein 1	Fscn1	AI663989, Fa, Fan1, fasc, fascin-1	10090	MGI:1352745
GAA	14387	glucosidase, alpha, acid	Gaa	E430018M07Rik	10090	MGI:95609
GALNT18	233733	polypeptide N-acetylgalactosaminyltransferase 18	Galnt18	2900011G21Rik, BC024988, Gal, Galntl4, galNAc-T18	10090	MGI:2446239
GIT1	216963	GIT ArfGAP 1	Git1	Cat-, Cat-1, p95C, p95Cat	10090	MGI:1927140
GM20594	100463512	predicted gene, 20594	Gm20594	Mtrnr2l	10090	MGI:5295700
GPR37L1	171469	G protein-coupled receptor 37-like 1	Gpr37l1	AW047233, CAG-1, CAG-18, D0Kis, D0Kist8	10090	MGI:1928503
GPR52	620246	G protein-coupled receptor 52	Gpr52	EG620246	10090	MGI:3643278
GPX4	625249	glutathione peroxidase 4	Gpx4	GPx-4, GSHPx-4, PHG, PHGPx, mtPHG	10090	MGI:104767
GRCC10	14790	gene rich cluster, C10 gene	Grcc10	2310033H05Rik, C10	10090	MGI:1315201
GRHPR	76238	glyoxylate reductase/hydroxypyruvate reductase	Grhpr	1110059D05Rik, 6430629L09Rik, Glxr	10090	MGI:1923488
GRIN2A	14811	glutamate receptor, ionotropic, NMDA2A (epsilon 1)	Grin2a	Glu, GluN2A, GluRepsilon1, N, NMD	10090	MGI:95820
HDAC5	15184	histone deacetylase 5	Hdac5	AI426555, Hdac4, mHDA, mHDA1, mKIAA0600	10090	MGI:1333784
HDDC3	68695	HD domain containing 3	Hddc3	1110033O09Rik, C86475, MESH1	10090	MGI:1915945
ID3	15903	inhibitor of DNA binding 3	Id3	HLH46, Hlh462, Idb, Idb3, bHLHb2	10090	MGI:96398
IGSF8	140559	immunoglobulin superfamily, member 8	Igsf8	ESTM3, ESTM34, EWI-, EWI-2, KCT-4	10090	MGI:2154090
INF2	70435	inverted formin, FH2 and WH2 domain containing	Inf2	2610204M08Rik, AA589465, AW125550, EG629699	10090	MGI:1917685
INTS1	68510	integrator complex subunit 1	Ints1	1110015K06Rik	10090	MGI:1915760
ISLR2	320563	immunoglobulin superfamily containing leucine-rich repeat 2	Islr2	B930052A04Rik, L, Linx, Mbu-3, mKIAA1465	10090	MGI:2444277
JOSD2	66124	Josephin domain containing 2	Josd2	1110007C05Rik	10090	MGI:1913374
JPH3	57340	junctophilin 3	Jph3	JP-, JP-3, Jp3	10090	MGI:1891497
JUNB	16477	jun B proto-oncogene	Junb		10090	MGI:96647
KCNJ4	16520	potassium inwardly-rectifying channel, subfamily J, member 4	Kcnj4	IR, IRK3, Kcnf, Kcnf2, MB-IR	10090	MGI:104743
KRTCAP2	66059	keratinocyte associated protein 2	Krtcap2	0610010I12Rik, Kcp2	10090	MGI:1913309
LAMB2	16779	laminin, beta 2	Lamb2	AW211941, L, Lamb, Lamb-2, Lams	10090	MGI:99916
LCN2	16819	lipocalin 2	Lcn2	24p, 24p3, AW212229, N, NRL	10090	MGI:96757
LPL	16956	lipoprotein lipase	Lpl		10090	MGI:96820
LRFN4	225875	leucine rich repeat and fibronectin type III domain containing 4	Lrfn4	BC023156, SA, Salm3	10090	MGI:2385612
LRP1	16971	low density lipoprotein receptor-related protein 1	Lrp1	A2, A2mr, AI316852, CD91, Lrp	10090	MGI:96828
LRRC4B	272381	leucine rich repeat containing 4B	Lrrc4b	A830007M12, Lr, Lrig4, Ngl3	10090	MGI:3027390
LRRN2	16980	leucine rich repeat protein 2, neuronal	Lrrn2	5730406J09Rik, NL, NLRR-2	10090	MGI:106037
LRRTM1	74342	leucine rich repeat transmembrane neuronal 1	Lrrtm1	4632401D06Rik, AW125451	10090	MGI:2389173
MAG	17136	myelin-associated glycoprotein	Mag	Gm, Gma, sigle, siglec-4a	10090	MGI:96912
MAP1S	270058	microtubule-associated protein 1S	Map1s	6430517J16Rik, Bpy2, Bpy2ip1, Ma, Map8	10090	MGI:2443304
MAP2K2	26396	mitogen-activated protein kinase kinase 2	Map2k2	AA589381, MEK2, MK2, Prkm, Prkmk2	10090	MGI:1346867
MAP3K10	269881	mitogen-activated protein kinase kinase kinase 10	Map3k10	BC028668, BC046514, MST, Mlk, Mlk2	10090	MGI:1346879
MBP	17196	myelin basic protein	Mbp	C76307, Hmb, Hmbpr, R75289, goll	10090	MGI:96925
MCM6	17219	minichromosome maintenance complex component 6	Mcm6	ASP-l1, D1Wsu22, D1Wsu22e, Mcmd6	10090	MGI:1298227
MET	17295	met proto-oncogene	Met	AI838057, HGF, HGFR, P, Par4	10090	MGI:96969
METRN	70083	meteorin, glial cell differentiation regulator	Metrn	1810034B16Rik, EyeLinc16, Hyrac	10090	MGI:1917333
MID1IP1	68041	Mid1 interacting protein 1 (gastrulation specific G12-like (zebrafish))	Mid1ip1	3110038L01Rik, Mig1, Mig12, S14R	10090	MGI:1915291
MRPL20	66448	mitochondrial ribosomal protein L20	Mrpl20	2610008D01Rik, 4930425I20Rik	10090	MGI:2137221
MRPL53	68499	mitochondrial ribosomal protein L53	Mrpl53	1110007K17Rik	10090	MGI:1915749
MRPL54	66047	mitochondrial ribosomal protein L54	Mrpl54	0610008M19Rik, D10Sut1, D10Sut1e	10090	MGI:1913297
MT2	17750	metallothionein 2	Mt2	AA409533, MT-, MT-II, Mt-2	10090	MGI:97172
NCOR2	20602	nuclear receptor co-repressor 2	Ncor2	N-CoR, SM, SMR, SMRT, SMRTe	10090	MGI:1337080
NDUFA13	67184	NADH:ubiquinone oxidoreductase subunit A13	Ndufa13	2700054G14Rik, AU022060, CDA01, CDA016, CGI-3	10090	MGI:1914434
NDUFA2	17991	NADH:ubiquinone oxidoreductase subunit A2	Ndufa2	AV000592, B8, C1-B8, CI-B8	10090	MGI:1343103
NDUFA7	66416	NADH:ubiquinone oxidoreductase subunit A7	Ndufa7	14.5kD, 14.5kDa, 2400007M02Rik, CI-B14.5a	10090	MGI:1913666
NDUFA8	68375	NADH:ubiquinone oxidoreductase subunit A8	Ndufa8	0610033L03Rik, AW261656, CI-19kD, CI-PGIV	10090	MGI:1915625
NDUFB10	68342	NADH:ubiquinone oxidoreductase subunit B10	Ndufb10	0610011B04Rik, 22kD, 22kDa, PDSW	10090	MGI:1915592
NDUFB11	104130	NADH:ubiquinone oxidoreductase subunit B11	Ndufb11	CI-ESSS, D5Bwg0566e, D5Bwg0577e, NP15.6, Np	10090	MGI:1349919
NDUFB6	230075	NADH:ubiquinone oxidoreductase subunit B6	Ndufb6	CI-B17, Gm137	10090	MGI:2684983
NDUFB7	66916	NADH:ubiquinone oxidoreductase subunit B7	Ndufb7	1110002H15Rik	10090	MGI:1914166
NDUFB8	67264	NADH:ubiquinone oxidoreductase subunit B8	Ndufb8	2900010I05Rik, AI987932, CI-ASHI	10090	MGI:1914514
NDUFC2	68197	NADH:ubiquinone oxidoreductase subunit C2	Ndufc2	1810004I06Rik, 2010300P09Rik, G1, R75094	10090	MGI:1344370
NDUFS7	75406	NADH:ubiquinone oxidoreductase core subunit S7	Ndufs7	1010001M04Rik, CI-20kD	10090	MGI:1922656
NDUFV1	17995	NADH:ubiquinone oxidoreductase core subunit V1	Ndufv1	CI-51kD	10090	MGI:107851
NISCH	64652	nischarin	Nisch	1200007D05Rik, 3202002H23Rik, AW494485, I-1, ed	10090	MGI:1928323
NME2	18103	NME/NM23 nucleoside diphosphate kinase 2	Nme2	NM23-H, NM23-H2, NM23B, nm23-M, nm23-M2	10090	MGI:97356
NME3	79059	NME/NM23 nucleoside diphosphate kinase 3	Nme3	1810009F08Rik, AI413736, DR-nm, DR-nm23, Ndk	10090	MGI:1930182
NOS1AP	70729	nitric oxide synthase 1 (neuronal) adaptor protein	Nos1ap	6330408P19Rik, Capon	10090	MGI:1917979
PALM	18483	paralemmin	Palm		10090	MGI:1261814
PCDHGC3	93706	protocadherin gamma subfamily C, 3	Pcdhgc3	PC4, PC43, Pcdh, Pcdh2	10090	MGI:1935201
PCSK1N	30052	proprotein convertase subtilisin/kexin type 1 inhibitor	Pcsk1n	AI848336, KEP, P, PEN, PEN19	10090	MGI:1353431
PCX	18563	pyruvate carboxylase	Pcx	P, Pc, Pcb	10090	MGI:97520
PDLIM2	213019	PDZ and LIM domain 2	Pdlim2	4732462F18Rik, S, Slim, mystiq	10090	MGI:2384850
PENK	18619	preproenkephalin	Penk	AI326464, EN, ENK, PPA, Pe	10090	MGI:104629
PEX6	224824	peroxisomal biogenesis factor 6	Pex6	AI132582, D130055I09Rik, PAF-2	10090	MGI:2385054
PFDN5	56612	prefoldin 5	Pfdn5	1190001O17Rik, 1700010A06Rik, D15Ertd697, D15Ertd697e, EIG-	10090	MGI:1928753
PHF2	18676	PHD finger protein 2	Phf2	GRC5	10090	MGI:1338034
PIGYL	66268	phosphatidylinositol glycan anchor biosynthesis, class Y-like	Pigyl	1810008A14Rik, PIG-Y, Pigy	10090	MGI:1913518
PIN1	23988	protein (peptidyl-prolyl cis/trans isomerase) NIMA-interacting 1	Pin1	0610025L01Rik, D9Bwg1161e	10090	MGI:1346036
PITPNM1	18739	phosphatidylinositol transfer protein, membrane-associated 1	Pitpnm1	DRE, DRES9, Mpt-1, Nir-2, PITPnm 1	10090	MGI:1197524
PITPNM2	19679	phosphatidylinositol transfer protein, membrane-associated 2	Pitpnm2	N, NIR3, RDGBA2, Rdgb, Rdgb2	10090	MGI:1336192
PKIG	18769	protein kinase inhibitor, gamma	Pkig	PKIgamma	10090	MGI:1343086
PLEC	18810	plectin	Plec	AA591047, AU042537, EBS1, PCN, PLTN	10090	MGI:1277961
PLK5	216166	polo like kinase 5	Plk5	6330514A18Rik	10090	MGI:3026984
POLR2E	66420	polymerase (RNA) II (DNA directed) polypeptide E	Polr2e	2410021N14Rik, 25kD, 25kDa, AW208866, RP	10090	MGI:1913670
PPIB	19035	peptidylprolyl isomerase B	Ppib	AA408962, AA553318, AI844835, Cph, Cphn	10090	MGI:97750
PPP1R16A	73062	protein phosphatase 1, regulatory subunit 16A	Ppp1r16a	2900084E10Rik, Mypt, Mypt3, R7552, R75527	10090	MGI:1920312
PPP1R1B	19049	protein phosphatase 1, regulatory inhibitor subunit 1B	Ppp1r1b	AU040756, DARP, DARPP-32, Dar, Darpp32	10090	MGI:94860
PRDX5	54683	peroxiredoxin 5	Prdx5	AOEB1, AOEB166, AOPP, P, PLP	10090	MGI:1859821
PRR7	432763	proline rich 7 (synaptic)	Prr7	XM_484263	10090	MGI:3487246
PRRC2A	53761	proline-rich coiled-coil 2A	Prrc2a	3110039B05Rik, Bat, Bat-, Bat-2, Bat2	10090	MGI:1915467
PTPRK	19272	protein tyrosine phosphatase, receptor type, K	Ptprk	AI853699, PT, PTPk, RP, RPTPkappa	10090	MGI:103310
QRFPR	229214	pyroglutamylated RFamide peptide receptor	Qrfpr	AQ2, AQ27, Gpr1, Gpr103, SP9155	10090	MGI:2677633
RAB5C	19345	RAB5C, member RAS oncogene family	Rab5c	AI326010, Rabl	10090	MGI:105306
RCC2	108911	regulator of chromosome condensation 2	Rcc2	2610510H01Rik, 2610529N02Rik, AA536646, AA675016, Td60	10090	MGI:1919784
REX1BD	66462	required for excision 1-B domain containing	Rex1bd	2810428I15Rik	10090	MGI:1913712
RGS14	51791	regulator of G-protein signaling 14	Rgs14	RPIP1	10090	MGI:1859709
RNASEK	52898	ribonuclease, RNase K	Rnasek	2310033H11Rik, AA571397, D11Bwg0434e	10090	MGI:106369
ROMO1	67067	reactive oxygen species modulator 1	Romo1	2010100O12Rik, AI853864	10090	MGI:1914317
RPL13A	22121	ribosomal protein L13A	Rpl13a	1810026N22Rik, Tstap19, Tstap198-7, tum-ant, tum-antigen	10090	MGI:1351455
RPL8	26961	ribosomal protein L8	Rpl8		10090	MGI:1350927
RPLP0	11837	ribosomal protein, large, P0	Rplp0	36B4, A, Arbp, L10E	10090	MGI:1927636
RPLP1	56040	ribosomal protein, large, P1	Rplp1	2410042H16Rik, Arpp1, C430017H15Rik	10090	MGI:1927099
RPLP2	67186	ribosomal protein, large P2	Rplp2	2700049I22Rik	10090	MGI:1914436
RPRML	104582	reprimo-like	Rprml	AW049332	10090	MGI:2144486
RPS21	66481	ribosomal protein S21	Rps21	1810049N11Rik, 2410030A14Rik	10090	MGI:1913731
RPS26	27370	ribosomal protein S26	Rps26		10090	MGI:1351628
RPS5	20103	ribosomal protein S5	Rps5	AA617411	10090	MGI:1097682
RXRG	20183	retinoid X receptor gamma	Rxrg	Nr2, Nr2b3	10090	MGI:98216
SCAF1	233208	SR-related CTD-associated factor 1	Scaf1	AI480556, SR-A1	10090	MGI:2141980
SELENOH	72657	selenoprotein H	Selenoh	2700094K13Rik, Se, Selh	10090	MGI:1919907
SELENOM	114679	selenoprotein M	Selenom	1500040L08Rik, A230103K18, Se, Selm, Sepm	10090	MGI:2149786
SERPINA9	71907	serine (or cysteine) peptidase inhibitor, clade A (alpha-1 antiproteinase, antitrypsin), member 9	Serpina9	2310014L03Rik, AW049635, Cent, Centerin	10090	MGI:1919157
SF3B5	66125	splicing factor 3b, subunit 5	Sf3b5	10kD, 10kDa, 1110005L13Rik, AU043053, Sf3b1	10090	MGI:1913375
SGTA	52551	small glutamine-rich tetratricopeptide repeat (TPR)-containing, alpha	Sgta	5330427H01Rik, AI194281, D10Ertd190, D10Ertd190e, Sg	10090	MGI:1098703
SH3GL2	20404	SH3-domain GRB2-like 2	Sh3gl2	9530001L19Rik, AI120490, AW555077, B930049H17Rik, EEN-B	10090	MGI:700009
SLC12A9	83704	solute carrier family 12 (potassium/chloride transporters), member 9	Slc12a9	CI, CIP1	10090	MGI:1933532
SLC4A3	20536	solute carrier family 4 (anion exchanger), member 3	Slc4a3	A930038D23Rik, Ae, Ae3	10090	MGI:109350
SLC6A7	240332	solute carrier family 6 (neurotransmitter transporter, L-proline), member 7	Slc6a7	AW455934, P, PROT	10090	MGI:2147363
SMIM12	80284	small integral membrane protein 12	Smim12	BC003266	10090	MGI:1933141
SNHG8	69895	small nucleolar RNA host gene 8	Snhg8	1110065M07Rik, 2010109N14Rik	10090	MGI:1917145
SNRK	20623	SNF related kinase	Snrk	2010012F07Rik, AI448042, AW547029, E030034B15, R74830	10090	MGI:108104
SNRPB	20638	small nuclear ribonucleoprotein B	Snrpb	AL024368, AU018828, D10Mgi2, SM, SM-	10090	MGI:98342
SOD1	20655	superoxide dismutase 1, soluble	Sod1	B430204E11Rik, Cu/Zn-, Cu/Zn-SOD, CuZn, CuZnSOD	10090	MGI:98351
SPHK2	56632	sphingosine kinase 2	Sphk2	C76851, Sk2, Spk2	10090	MGI:1861380
SPNS1	73658	spinster homolog 1	Spns1	2210013K02Rik, Spin1, Spinl	10090	MGI:1920908
SPTBN2	20743	spectrin beta, non-erythrocytic 2	Sptbn2	Sp, Spnb3	10090	MGI:1313261
SREBF1	20787	sterol regulatory element binding transcription factor 1	Srebf1	ADD-, ADD1, SRE, SREB, SREBP	10090	MGI:107606
SSBP4	76900	single stranded DNA binding protein 4	Ssbp4	1210002E11Rik, AW743380, Sspb4	10090	MGI:1924150
STMN3	20262	stathmin-like 3	Stmn3	9330161A03Rik, AI604839, R75323, S, Sclip	10090	MGI:1277137
SYNDIG1L	627191	synapse differentiation inducing 1 like	Syndig1l	DSPC1, Gm261, SynD, SynDIG2, Tmem90	10090	MGI:2685107
SZRD1	213491	SUZ RNA binding domain containing 1	Szrd1	1110022I03, D4Ertd22, D4Ertd22e	10090	MGI:1098672
TAC1	21333	tachykinin 1	Tac1	4930528L02Rik, N, NK, NK-, NK-1	10090	MGI:98474
TALDO1	21351	transaldolase 1	Taldo1		10090	MGI:1274789
TCEAL5	331532	transcription elongation factor A (SII)-like 5	Tceal5	6430401A05Rik	10090	MGI:3036236
TIMM13	30055	translocase of inner mitochondrial membrane 13	Timm13	D10Ertd378, D10Ertd378e, Tim, Tim9, Timm	10090	MGI:1353432
TKT	21881	transketolase	Tkt	p6, p68	10090	MGI:105992
TMEM119	231633	transmembrane protein 119	Tmem119	AW208946, BC025600, ob, obif	10090	MGI:2385228
TMEM143	70209	transmembrane protein 143	Tmem143	2310076O21Rik, AI481604	10090	MGI:1917459
TNK2	51789	tyrosine kinase, non-receptor, 2	Tnk2	Ac, Ack, Ack-1, Ack1, Cdgip	10090	MGI:1858308
TNRC18	231861	trinucleotide repeat containing 18	Tnrc18	BC025631, EG381742, Zfp46, Zfp469	10090	MGI:3648294
TOMM6	66119	translocase of outer mitochondrial membrane 6	Tomm6	1110002E23Rik, AI663970	10090	MGI:1913369
TPGS1	110012	tubulin polyglutamylase complex subunit 1	Tpgs1	AV005629, Gm16517, Gtrgeo, Gtrgeo22, PGs1	10090	MGI:106618
TPPP3	67971	tubulin polymerization-promoting protein family member 3	Tppp3	2700055K07Rik, CGI-38, Ceacam9, mmCGM8	10090	MGI:1915221
TSC22D4	78829	TSC22 domain family, member 4	Tsc22d4	0610009M14Rik, 1700023B23Rik, AI415410, Thg-1p, Thg-1pit	10090	MGI:1926079
TSHZ3	243931	teashirt zinc finger family member 3	Tshz3	A630038G13Rik, Tsh, Tsh3, Zfp53, Zfp537	10090	MGI:2442819
TUBB3	22152	tubulin, beta 3 class III	Tubb3	3200002H15Rik, M(beta)3, M(beta)6	10090	MGI:107813
TUBB4A	22153	tubulin, beta 4A class IVA	Tubb4a	AI325297, M(beta)4, Tubb, Tubb4	10090	MGI:107848
UCHL1	22223	ubiquitin carboxy-terminal hydrolase L1	Uchl1	AW822034, C88048, PGP 9.5, PGP9, PGP9.5	10090	MGI:103149
UQCC2	67267	ubiquinol-cytochrome c reductase complex assembly factor 2	Uqcc2	2900010M23Rik, Cbp, Cbp6, M19, Mnf	10090	MGI:1914517
UQCR11	66594	ubiquinol-cytochrome c reductase, complex III subunit XI	Uqcr11	0710008D09Rik, AL022707, Uqc, Uqcr	10090	MGI:1913844
UQCRQ	22272	ubiquinol-cytochrome c reductase, complex III subunit VII	Uqcrq	1100001F06Rik, 1500040F11Rik, 5830407L17Rik, 9.5kDa, AA959903	10090	MGI:107807
VAT1L	270097	vesicle amine transport protein 1 like	Vat1l	9430073I07, AI427515, mKIAA1576	10090	MGI:2142534
VGF	381677	VGF nerve growth factor inducible	Vgf	Gm1052	10090	MGI:1343180
ZBTB17	22642	zinc finger and BTB domain containing 17	Zbtb17	AA589413, Lp-1, Miz, Miz1, Zfp10	10090	MGI:107410
ZFP428	232969	zinc finger protein 428	Zfp428	2410005H09Rik, AV271806, AW047854, Znf428	10090	MGI:1916463
ZFP523	224656	zinc finger protein 523	Zfp523	2810027J07, BC025615, Znf76	10090	MGI:2687278
ZMIZ2	52915	zinc finger, MIZ-type containing 2	Zmiz2	Zim, Zimp7	10090	MGI:106374
ZNHIT1	70103	zinc finger, HIT domain containing 1	Znhit1	2700001K05Rik, ZNFN4A1	10090	MGI:1917353
C2orf81		Chromosome 2 Open Reading Frame 81	1700003E16Rik
C20orf27		Chromosome 20 Open Reading Frame 27	1700037H04Rik
C4orf3		Chromosome 4 Open Reading Frame 3	1810037I17Rik

## Sheet: D. SFARI genes
geneID	gene name
ADORA2A	adenosine A2a receptor
AHDC1	AT hook, DNA binding motif, containing 1
AP2S1	adaptor-related protein complex 2, sigma 1 subunit
CELF4	CUGBP, Elav-like family member 4
DLGAP3	DLG associated protein 3
DRD2	dopamine receptor D2
GRIN2A	glutamate receptor, ionotropic, NMDA2A (epsilon 1)
INTS1	integrator complex subunit 1
LRP1	low density lipoprotein receptor-related protein 1
MCM6	minichromosome maintenance complex component 6
MET	met proto-oncogene
PHF2	PHD finger protein 2
PPP1R1B	protein phosphatase 1, regulatory inhibitor subunit 1B
SOD1	superoxide dismutase 1, soluble
TSHZ3	teashirt zinc finger family member 3

## Sheet: E. Enrichment Gene Ontologies
EnrichR results for Gene Ontologies of genes common between Striatum and Cortex
red highlight: adj P-value < 0.05; blue highlight: P-value <0.05
Term	Overlap	P-value	Adjusted P-value	Odds Ratio	Combined Score	Genes	category
mitochondrial ATP synthesis coupled electron transport (GO:0042775)	17/85	1.36195e-16	2.04565e-13	22.5883	825.206	COX8A;NDUFA8;NDUFA13;NDUFB8;NDUFA7;NDUFB7;NDUFB6;NDUFB10;NDUFB11;COX4I1;NDUFA2;NDUFC2;UQCR11;COX6A1;NDUFS7;UQCRQ;NDUFV1	GO Biological Process 2018
respiratory electron transport chain (GO:0022904)	17/94	8.18051e-16	6.14356e-13	19.939	692.673	COX8A;NDUFA8;NDUFA13;NDUFB8;NDUFA7;NDUFB7;NDUFB6;NDUFB10;NDUFB11;COX4I1;NDUFA2;NDUFC2;UQCR11;COX6A1;NDUFS7;UQCRQ;NDUFV1	GO Biological Process 2018
mitochondrial electron transport, NADH to ubiquinone (GO:0006120)	12/46	1.42872e-13	7.15312e-11	31.2282	923.63	NDUFA8;NDUFB8;NDUFA13;NDUFA7;NDUFB7;NDUFB6;NDUFB10;NDUFS7;NDUFB11;NDUFA2;NDUFC2;NDUFV1	GO Biological Process 2018
mitochondrial respiratory chain complex assembly (GO:0033108)	14/97	7.64851e-12	2.14816e-09	15.022	384.51	NDUFA8;NDUFA13;NDUFB8;NDUFA7;NDUFB7;NDUFB10;NDUFB6;NDUFB11;UQCC2;COX17;NDUFA2;NDUFC2;NDUFS7;NDUFV1	GO Biological Process 2018
NADH dehydrogenase complex assembly (GO:0010257)	12/64	1.00114e-11	2.14816e-09	20.3998	516.672	NDUFA8;NDUFA13;NDUFB8;NDUFA7;NDUFB7;NDUFS7;NDUFB6;NDUFB10;NDUFB11;NDUFA2;NDUFC2;NDUFV1	GO Biological Process 2018
mitochondrial respiratory chain complex I biogenesis (GO:0097031)	12/64	1.00114e-11	2.14816e-09	20.3998	516.672	NDUFA8;NDUFA13;NDUFB8;NDUFA7;NDUFB7;NDUFS7;NDUFB6;NDUFB10;NDUFB11;NDUFA2;NDUFC2;NDUFV1	GO Biological Process 2018
mitochondrial respiratory chain complex I assembly (GO:0032981)	12/64	1.00114e-11	2.14816e-09	20.3998	516.672	NDUFA8;NDUFA13;NDUFB8;NDUFA7;NDUFB7;NDUFS7;NDUFB6;NDUFB10;NDUFB11;NDUFA2;NDUFC2;NDUFV1	GO Biological Process 2018
cytoplasmic translation (GO:0002181)	7/54	3.13041e-06	0.000587734	12.8804	163.25	RPS26;RPLP1;RPLP0;EIF4H;RPLP2;RPL8;RPS21	GO Biological Process 2018
SRP-dependent cotranslational protein targeting to membrane (GO:0006614)	8/89	1.00452e-05	0.00167644	8.56431	98.5616	RPS26;RPLP1;RPS5;RPLP0;RPLP2;RPL13A;RPL8;RPS21	GO Biological Process 2018
cotranslational protein targeting to membrane (GO:0006613)	8/93	1.39136e-05	0.00208982	8.15963	91.2462	RPS26;RPLP1;RPS5;RPLP0;RPLP2;RPL13A;RPL8;RPS21	GO Biological Process 2018
regulation of extracellular matrix disassembly (GO:0010715)	4/14	1.69546e-05	0.00231507	34.2078	375.772	DDR1;CST3;LRP1;FSCN1	GO Biological Process 2018
protein targeting to ER (GO:0045047)	8/97	1.89655e-05	0.00237385	7.79132	84.7141	RPS26;RPS5;RPLP1;RPLP0;RPLP2;RPL13A;RPL8;RPS21	GO Biological Process 2018
viral gene expression (GO:0019080)	8/110	4.71797e-05	0.00545107	6.79382	67.6769	RPS26;RPS5;RPLP1;RPLP0;RPLP2;RPL13A;RPL8;RPS21	GO Biological Process 2018
nuclear-transcribed mRNA catabolic process, nonsense-mediated decay (GO:0000184)	8/112	5.36663e-05	0.00572543	6.66249	65.5104	RPS26;RPS5;RPLP1;RPLP0;RPLP2;RPL13A;RPL8;RPS21	GO Biological Process 2018
viral transcription (GO:0019083)	8/113	5.7178e-05	0.00572543	6.5987	64.4649	RPS26;RPS5;RPLP1;RPLP0;RPLP2;RPL13A;RPL8;RPS21	GO Biological Process 2018
response to reactive oxygen species (GO:0000302)	6/60	7.27439e-05	0.00682884	9.5638	91.1293	PRDX5;ROMO1;PTPRK;FOS;APOE;SOD1	GO Biological Process 2018
regulation of nitrogen compound metabolic process (GO:0051171)	3/8	8.58673e-05	0.00758663	51.1034	478.467	LRP1;NOS1AP;APOE	GO Biological Process 2018
negative regulation of G-protein coupled receptor protein signaling pathway (GO:0045744)	4/21	9.50227e-05	0.0078316	20.1151	186.294	PALM;DRD2;MET;ADRA2A	GO Biological Process 2018
translation (GO:0006412)	11/232	9.90681e-05	0.0078316	4.34276	40.039	RPS26;NDUFA7;RPLP1;RPS5;RPLP0;EIF4H;RPLP2;RPL13A;RPL8;EEF2;RPS21	GO Biological Process 2018
viral process (GO:0016032)	10/220	0.000287329	0.0215784	4.13862	33.75	RPS26;RPLP1;RPS5;RPLP0;AP2S1;RPLP2;RPL13A;APOE;RPL8;RPS21	GO Biological Process 2018
ncRNA processing (GO:0034470)	10/227	0.000368425	0.0262325	4.00369	31.6542	RPS26;FBL;INTS1;RPLP1;RPS5;RPLP0;RPLP2;RPL13A;RPL8;RPS21	GO Biological Process 2018
positive regulation of protein catabolic process (GO:0045732)	6/81	0.000384232	0.0262325	6.8786	54.0952	NDUFA13;EGLN2;LRP1;UQCC2;APOE;ADRA2A	GO Biological Process 2018
rRNA metabolic process (GO:0016072)	9/200	0.000618584	0.039897	4.08113	30.1517	RPS26;FBL;RPLP1;RPS5;RPLP0;RPLP2;RPL13A;RPL8;RPS21	GO Biological Process 2018
cellular protein metabolic process (GO:0044267)	15/484	0.000637502	0.039897	2.80519	20.6405	LAMB2;RPLP1;RPS5;RPLP0;RPL13A;RPL8;RPS26;CST3;ADORA2A;VGF;ADPRH;PENK;RPLP2;APOE;RPS21	GO Biological Process 2018
rRNA processing (GO:0006364)	9/202	0.00066426	0.0399087	4.03842	29.5485	RPS26;FBL;RPLP1;RPS5;RPLP0;RPLP2;RPL13A;RPL8;RPS21	GO Biological Process 2018
antigen processing and presentation of exogenous peptide antigen via MHC class II (GO:0019886)	6/97	0.00100146	0.0537803	5.66457	39.1212	DCTN1;DCTN3;AP2S1;FCGR2B;SH3GL2;SPTBN2	GO Biological Process 2018
antigen processing and presentation of exogenous peptide antigen (GO:0002478)	6/97	0.00100146	0.0537803	5.66457	39.1212	DCTN1;DCTN3;AP2S1;FCGR2B;SH3GL2;SPTBN2	GO Biological Process 2018
antigen processing and presentation of peptide antigen via MHC class II (GO:0002495)	6/98	0.00105648	0.0537803	5.60272	38.3944	DCTN1;DCTN3;AP2S1;FCGR2B;SH3GL2;SPTBN2	GO Biological Process 2018
peptide biosynthetic process (GO:0043043)	8/174	0.00107417	0.0537803	4.16093	28.4449	RPS26;RPS5;RPLP1;RPLP0;RPLP2;RPL13A;RPL8;RPS21	GO Biological Process 2018
nuclear-transcribed mRNA catabolic process (GO:0000956)	8/174	0.00107417	0.0537803	4.16093	28.4449	RPS26;RPS5;RPLP1;RPLP0;RPLP2;RPL13A;RPL8;RPS21	GO Biological Process 2018
regulation of cholesterol biosynthetic process (GO:0045540)	4/40	0.00121835	0.0590311	9.48966	63.678	SREBF1;FASN;APOE;SOD1	GO Biological Process 2018
cellular macromolecule biosynthetic process (GO:0034645)	12/367	0.00140149	0.0657825	2.94221	19.331	RPS26;ALAS2;RPLP1;RPS5;RPLP0;POLR2E;RPLP2;RPL13A;MCM6;RPL8;EEF2;RPS21	GO Biological Process 2018
ribosome biogenesis (GO:0042254)	9/226	0.00146132	0.0665122	3.58737	23.4199	RPS26;FBL;RPLP1;RPS5;RPLP0;RPLP2;RPL13A;RPL8;RPS21	GO Biological Process 2018
regulation of cholesterol transport (GO:0032374)	3/20	0.00157497	0.0695768	15.0213	96.9402	ABCA2;LRP1;APOE	GO Biological Process 2018
MP:0001364 decreased anxiety-related response	9/151	7.6134e-05	0.0746666	5.50315	52.1864	DDR1;GRIN2A;PCSK1N;GT(ROSA)26SOR;GPR52;FOS;DRD2;TAC1;GIT1	MGI Mammalian Phenotype L4
MP:0009746 enhanced behavioral response to xenobiotic	4/22	0.000115072	0.0746666	18.9966	172.299	GPR52;DLGAP3;DRD2;SOD1	MGI Mammalian Phenotype L4
MP:0002757 decreased vertical activity	9/169	0.000179534	0.0746666	4.87956	42.0869	BCKDHA;GRIN2A;PCSK1N;GT(ROSA)26SOR;CLPP;GAA;APOE;DRD2;SH3GL2	MGI Mammalian Phenotype L4
MP:0001463 abnormal spatial learning	9/172	0.000204847	0.0746666	4.78902	40.6744	GRIN2A;VGF;RGS14;MBP;APOE;FOS;CKB;BAIAP2;GIT1	MGI Mammalian Phenotype L4
mitochondrial electron transport, cytochrome c to oxygen (GO:0006123)	3/21	0.00182163	0.0760026	14.1861	89.486	COX8A;COX4I1;COX6A1	GO Biological Process 2018
long-term synaptic potentiation (GO:0060291)	3/21	0.00182163	0.0760026	14.1861	89.486	GRIN2A;RGS14;TSHZ3	GO Biological Process 2018
interleukin-12-mediated signaling pathway (GO:0035722)	4/46	0.00205921	0.0813932	8.13152	50.2969	RPLP0;BOLA2;TALDO1;SOD1	GO Biological Process 2018
cellular response to interleukin-12 (GO:0071349)	4/46	0.00205921	0.0813932	8.13152	50.2969	RPLP0;BOLA2;TALDO1;SOD1	GO Biological Process 2018
MP:0011636 disorganized mitochondrial cristae	3/12	0.000325791	0.0950008	28.3851	227.911	CLPP;GT(ROSA)26SOR;SOD1	MGI Mammalian Phenotype L4
positive regulation of lipid transport (GO:0032370)	2/7	0.00277688	0.096997	33.9227	199.684	LRP1;APOE	GO Biological Process 2018
regulation of dendritic spine maintenance (GO:1902950)	2/7	0.00277688	0.096997	33.9227	199.684	APOE;FCGR2B	GO Biological Process 2018
regulation of extracellular matrix organization (GO:1903053)	2/7	0.00277688	0.096997	33.9227	199.684	DDR1;LRP1	GO Biological Process 2018
protein import into mitochondrial inner membrane (GO:0045039)	2/7	0.00277688	0.096997	33.9227	199.684	NDUFA13;TIMM13	GO Biological Process 2018
regulation of sterol transport (GO:0032371)	2/7	0.00277688	0.096997	33.9227	199.684	LRP1;APOE	GO Biological Process 2018
response to alcohol (GO:0097305)	3/25	0.00304314	0.103882	11.6044	67.2461	ABCA2;GRIN2A;SOD1	GO Biological Process 2018
positive regulation of proteolysis (GO:0045862)	4/52	0.00323409	0.107947	7.11291	40.7855	NDUFA13;BAD;APOE;ADRA2A	GO Biological Process 2018
positive regulation of chemokine secretion (GO:0090197)	2/8	0.00367389	0.117408	28.2675	158.482	LPL;MBP	GO Biological Process 2018
regulation of dopamine receptor signaling pathway (GO:0060159)	2/8	0.00367389	0.117408	28.2675	158.482	PALM;DRD2	GO Biological Process 2018
positive regulation of lipid biosynthetic process (GO:0046889)	3/28	0.00422376	0.12968	10.2103	55.8202	SREBF1;MID1IP1;APOE	GO Biological Process 2018
cellular iron ion homeostasis (GO:0006879)	4/56	0.00423058	0.12968	6.56444	35.8774	ALAS2;ATP6V1G1;LCN2;SOD1	GO Biological Process 2018
very-low-density lipoprotein particle remodeling (GO:0034372)	2/9	0.00468709	0.13283	24.2281	129.934	LPL;APOE	GO Biological Process 2018
negative regulation of alcohol biosynthetic process (GO:1902931)	2/9	0.00468709	0.13283	24.2281	129.934	APOE;SOD1	GO Biological Process 2018
ATP synthesis coupled electron transport (GO:0042773)	2/9	0.00468709	0.13283	24.2281	129.934	NDUFB6;NDUFV1	GO Biological Process 2018
chylomicron remodeling (GO:0034371)	2/9	0.00468709	0.13283	24.2281	129.934	LPL;APOE	GO Biological Process 2018
cellular transition metal ion homeostasis (GO:0046916)	5/93	0.00482496	0.134205	4.86092	25.9279	ALAS2;ATP6V1G1;LCN2;ATOX1;SOD1	GO Biological Process 2018
axonogenesis (GO:0007409)	8/223	0.00498258	0.135403	3.20459	16.9901	LRFN4;DOK4;MAP1S;LRRN2;TUBB3;DRD2;BAIAP2;SPTBN2	GO Biological Process 2018
axon development (GO:0061564)	5/94	0.0050483	0.135403	4.80606	25.4178	LRFN4;MAP1S;LRRN2;DRD2;BAIAP2	GO Biological Process 2018
cell morphogenesis involved in neuron differentiation (GO:0048667)	5/97	0.00576219	0.150554	4.64863	23.9704	LRFN4;MAP1S;LRRN2;DRD2;BAIAP2	GO Biological Process 2018
regulation of amyloid-beta clearance (GO:1900221)	2/10	0.00581366	0.150554	21.1985	109.12	LRP1;APOE	GO Biological Process 2018
MP:0009750 impaired behavioral response to addictive substance	3/16	0.000800966	0.150626	19.6472	140.079	ADORA2A;PPP1R1B;DRD2	MGI Mammalian Phenotype L4
MP:0003313 abnormal locomotor activation	6/94	0.000849545	0.150626	5.85857	41.4249	ENHO;PCSK1N;ADORA2A;GPR37L1;DRD2;SOD1	MGI Mammalian Phenotype L4
MP:0001405 impaired coordination	13/405	0.00105901	0.150626	2.89402	19.8252	GT(ROSA)26SOR;GAA;COX6A1;SOD1;ENHO;GRIN2A;UCHL1;MAG;JPH3;MBP;DRD2;MET;SPTBN2	MGI Mammalian Phenotype L4
MP:0005477 increased circulating thyroxine level	3/18	0.00114705	0.150626	17.0259	115.275	RAB5C;GT(ROSA)26SOR;CDH19	MGI Mammalian Phenotype L4
MP:0001402 hypoactivity	15/514	0.00116782	0.150626	2.63245	17.7759	GT(ROSA)26SOR;GAA;ATOX1;SOD1;NISCH;ENHO;MAG;SELENOM;LRFN4;ADORA2A;CLPP;LRRTM1;MBP;DRD2;SH3GL2	MGI Mammalian Phenotype L4
MP:0005551 abnormal eye electrophysiology	7/138	0.00124565	0.150626	4.60151	30.7754	LAMB2;GT(ROSA)26SOR;APOE;FOS;SLC4A3;PFDN5;SOD1	MGI Mammalian Phenotype L4
MP:0001417 decreased exploration in new environment	6/102	0.00130008	0.150626	5.36818	35.6733	GRIN2A;ADORA2A;LRP1;ZMIZ2;LRRTM1;APOE	MGI Mammalian Phenotype L4
MP:0008060 abnormal podocyte slit diaphragm morphology	2/5	0.00134303	0.150626	56.5436	373.913	DDR1;GT(ROSA)26SOR	MGI Mammalian Phenotype L4
mitochondrial transmembrane transport (GO:1990542)	3/32	0.0061785	0.15729	8.80024	44.764	NDUFA13;MID1IP1;TIMM13	GO Biological Process 2018
iron ion homeostasis (GO:0055072)	4/63	0.00643792	0.161163	5.78355	29.1812	ALAS2;ATP6V1G1;LCN2;SOD1	GO Biological Process 2018
positive regulation of protein polymerization (GO:0032273)	4/64	0.00680505	0.16756	5.68687	28.378	TPPP3;DCTN1;BAIAP2;MET	GO Biological Process 2018
positive regulation by host of viral process (GO:0044794)	2/11	0.00705082	0.1681	18.8422	93.3556	APOE;PPIB	GO Biological Process 2018
modulation by host of viral process (GO:0044788)	2/11	0.00705082	0.1681	18.8422	93.3556	APOE;PPIB	GO Biological Process 2018
cellular response to reactive oxygen species (GO:0034614)	4/65	0.00718577	0.168641	5.59336	27.6069	PRDX5;ROMO1;PTPRK;FOS	GO Biological Process 2018
regulation of microtubule polymerization (GO:0031113)	3/35	0.00794545	0.181806	7.974	38.5555	DCTN1;TUBB4A;MET	GO Biological Process 2018
negative regulation of protein serine/threonine kinase activity (GO:0071901)	4/67	0.00798879	0.181806	5.41524	26.1541	UCHL1;RGS14;APOE;PKIG	GO Biological Process 2018
activation of cysteine-type endopeptidase activity (GO:0097202)	2/12	0.00839583	0.184396	16.9571	81.0552	GRIN2A;BAD	GO Biological Process 2018
establishment of protein localization to mitochondrial membrane (GO:0090151)	2/12	0.00839583	0.184396	16.9571	81.0552	NDUFA13;TIMM13	GO Biological Process 2018
regulation of nitric-oxide synthase activity (GO:0050999)	3/36	0.00859371	0.184396	7.73197	36.7789	DDAH2;NOS1AP;APOE	GO Biological Process 2018
inner mitochondrial membrane organization (GO:0007007)	3/36	0.00859371	0.184396	7.73197	36.7789	NDUFA13;ATP5E;TIMM13	GO Biological Process 2018
regulation of endocytosis (GO:0030100)	4/69	0.00884859	0.187191	5.24809	24.8103	RAB5C;LRP1;AP2S1;APOE	GO Biological Process 2018
protein peptidyl-prolyl isomerization (GO:0000413)	3/37	0.00927213	0.193427	7.50418	35.1252	FKBP8;PIN1;PPIB	GO Biological Process 2018
positive regulation of ERAD pathway (GO:1904294)	2/13	0.00984601	0.194588	15.4147	71.2268	BAG6;SGTA	GO Biological Process 2018
triglyceride-rich lipoprotein particle remodeling (GO:0034370)	2/13	0.00984601	0.194588	15.4147	71.2268	LPL;APOE	GO Biological Process 2018
regulation of production of miRNAs involved in gene silencing by miRNA (GO:1903798)	2/13	0.00984601	0.194588	15.4147	71.2268	NCOR2;MAP2K2	GO Biological Process 2018
positive regulation of cholesterol efflux (GO:0010875)	2/13	0.00984601	0.194588	15.4147	71.2268	LRP1;APOE	GO Biological Process 2018
positive regulation of multicellular organismal process (GO:0051240)	7/202	0.0100699	0.196373	3.0812	14.168	LRP1;BAD;NME2;TMEM119;PPIB;ADRA2A;SOD1	GO Biological Process 2018
regulation of neuron death (GO:1901214)	4/72	0.010248	0.196373	5.01579	22.9757	EGLN2;FOS;APOE;FCGR2B	GO Biological Process 2018
regulation of autophagy (GO:0010506)	7/203	0.0103285	0.196373	3.06532	14.0172	SREBF1;ZBTB17;ATP6V1G1;UCHL1;ATP6V0B;BAD;MET	GO Biological Process 2018
positive regulation of cytokine secretion (GO:0050715)	4/73	0.0107445	0.200126	4.94284	22.4077	C1QTNF4;LPL;MBP;DRD2	GO Biological Process 2018
negative regulation of hydrogen peroxide-induced cell death (GO:1903206)	2/14	0.0113987	0.200126	14.1295	63.2188	GPR37L1;MET	GO Biological Process 2018
mitochondrial electron transport, ubiquinol to cytochrome c (GO:0006122)	2/14	0.0113987	0.200126	14.1295	63.2188	UQCRQ;UQCR11	GO Biological Process 2018
copper ion transport (GO:0006825)	2/14	0.0113987	0.200126	14.1295	63.2188	COX17;ATOX1	GO Biological Process 2018
response to ethanol (GO:0045471)	2/14	0.0113987	0.200126	14.1295	63.2188	GRIN2A;SOD1	GO Biological Process 2018
peptidyl-proline modification (GO:0018208)	3/40	0.011491	0.200126	6.89469	30.793	FKBP8;PIN1;PPIB	GO Biological Process 2018
negative regulation of catabolic process (GO:0009895)	3/40	0.011491	0.200126	6.89469	30.793	CST3;PIN1;ADRA2A	GO Biological Process 2018
cellular response to oxidative stress (GO:0034599)	5/115	0.0115919	0.200126	3.88439	17.3145	PRDX5;ROMO1;PTPRK;FOS;SOD1	GO Biological Process 2018
regulation of cholesterol metabolic process (GO:0090181)	3/41	0.0122925	0.207454	6.71291	29.5285	SREBF1;FASN;APOE	GO Biological Process 2018
calcium-dependent cell-cell adhesion via plasma membrane cell adhesion molecules (GO:0016339)	3/41	0.0122925	0.207454	6.71291	29.5285	CDH6;PCDHGC3;CDH19	GO Biological Process 2018
positive regulation of membrane protein ectodomain proteolysis (GO:0051044)	2/15	0.0130514	0.209727	13.0419	56.5871	APOE;ADRA2A	GO Biological Process 2018
negative regulation of RNA metabolic process (GO:0051253)	2/15	0.0130514	0.209727	13.0419	56.5871	RPS26;NCOR2	GO Biological Process 2018
positive regulation of potassium ion transport (GO:0043268)	2/15	0.0130514	0.209727	13.0419	56.5871	NOS1AP;ADRA2A	GO Biological Process 2018
nitric oxide mediated signal transduction (GO:0007263)	2/15	0.0130514	0.209727	13.0419	56.5871	DDAH2;APOE	GO Biological Process 2018
negative regulation of protein secretion (GO:0050709)	3/42	0.0131254	0.209727	6.54045	28.3411	DRD2;FCGR2B;ADRA2A	GO Biological Process 2018
central nervous system development (GO:0007417)	7/217	0.014476	0.223584	2.85892	12.1083	BAG6;GRIN2A;PITPNM1;ADORA2A;MAP1S;MBP;SH3GL2	GO Biological Process 2018
negative regulation of MAPK cascade (GO:0043409)	4/80	0.0146562	0.223584	4.48599	18.9438	UCHL1;RGS14;PIN1;APOE	GO Biological Process 2018
positive regulation of nitric-oxide synthase activity (GO:0051000)	2/16	0.0148015	0.223584	12.1097	51.0187	NOS1AP;APOE	GO Biological Process 2018
negative regulation of steroid biosynthetic process (GO:0010894)	2/16	0.0148015	0.223584	12.1097	51.0187	APOE;SOD1	GO Biological Process 2018
positive regulation of response to endoplasmic reticulum stress (GO:1905898)	2/16	0.0148015	0.223584	12.1097	51.0187	BAG6;FCGR2B	GO Biological Process 2018
positive regulation of viral process (GO:0048524)	3/44	0.0148858	0.223584	6.22077	26.173	POLR2E;APOE;PPIB	GO Biological Process 2018
MP:0001489 decreased startle reflex	8/195	0.00220753	0.22695	3.6897	22.5658	DPM3;MAG;CLPP;MBP;APOE;CKB;DRD2;ADRA2A	MGI Mammalian Phenotype L4
MP:0002822 catalepsy	2/7	0.00277688	0.22695	33.9227	199.684	DRD2;RXRG	MGI Mammalian Phenotype L4
MP:0010161 decreased brain cholesterol level	2/7	0.00277688	0.22695	33.9227	199.684	MBP;APOE	MGI Mammalian Phenotype L4
MP:0008289 abnormal adrenal medulla morphology	2/7	0.00277688	0.22695	33.9227	199.684	VGF;APOE	MGI Mammalian Phenotype L4
MP:0003871 abnormal myelin sheath morphology	4/50	0.00280185	0.22695	7.42292	43.6281	ABCA2;MAG;MBP;APOE	MGI Mammalian Phenotype L4
positive regulation of binding (GO:0051099)	4/81	0.0152792	0.227222	4.4275	18.5125	LRP1;EDF1;APOE;MET	GO Biological Process 2018
protein polymerization (GO:0051258)	3/45	0.0158135	0.229385	6.07235	25.1814	TPPP3;GPX4;MID1IP1	GO Biological Process 2018
regulation of multicellular organism growth (GO:0040014)	2/17	0.0166464	0.229385	11.3019	46.2874	PPIB;SOD1	GO Biological Process 2018
positive regulation of cholesterol transport (GO:0032376)	2/17	0.0166464	0.229385	11.3019	46.2874	LRP1;APOE	GO Biological Process 2018
response to purine-containing compound (GO:0014074)	2/17	0.0166464	0.229385	11.3019	46.2874	VGF;JUNB	GO Biological Process 2018
positive regulation of interleukin-6 secretion (GO:2000778)	2/17	0.0166464	0.229385	11.3019	46.2874	C1QTNF4;MBP	GO Biological Process 2018
long-term memory (GO:0007616)	2/17	0.0166464	0.229385	11.3019	46.2874	RGS14;APOE	GO Biological Process 2018
positive regulation of cation transmembrane transport (GO:1904064)	2/17	0.0166464	0.229385	11.3019	46.2874	COX17;NOS1AP	GO Biological Process 2018
positive regulation of cellular protein catabolic process (GO:1903364)	2/17	0.0166464	0.229385	11.3019	46.2874	UQCC2;APOE	GO Biological Process 2018
negative regulation of response to stimulus (GO:0048585)	5/127	0.017168	0.233385	3.50018	14.2272	DDR1;NCOR2;FCGR2B;MET;ADRA2A	GO Biological Process 2018
positive regulation of supramolecular fiber organization (GO:1902905)	4/84	0.0172475	0.233385	4.26082	17.2993	DCTN1;APOE;BAIAP2;MET	GO Biological Process 2018
MP:0001488 increased startle reflex	6/121	0.00308781	0.236949	4.47693	25.878	RPS26;ABCA2;GRIN2A;NOS1AP;GPR52;APOE	MGI Mammalian Phenotype L4
regulation of cholesterol efflux (GO:0010874)	2/18	0.0185839	0.240629	10.595	42.2258	LRP1;APOE	GO Biological Process 2018
regulation of peptidase activity (GO:0052547)	2/18	0.0185839	0.240629	10.595	42.2258	CST3;NDUFA13	GO Biological Process 2018
cell-substrate adherens junction assembly (GO:0007045)	2/18	0.0185839	0.240629	10.595	42.2258	RCC2;PTPRK	GO Biological Process 2018
response to organophosphorus (GO:0046683)	2/18	0.0185839	0.240629	10.595	42.2258	VGF;JUNB	GO Biological Process 2018
focal adhesion assembly (GO:0048041)	2/18	0.0185839	0.240629	10.595	42.2258	RCC2;PTPRK	GO Biological Process 2018
regulation of mitochondrion organization (GO:0010821)	3/48	0.0187882	0.241196	5.66667	22.5223	ZBTB17;SREBF1;INF2	GO Biological Process 2018
transmembrane receptor protein tyrosine kinase signaling pathway (GO:0007169)	10/396	0.0191022	0.243148	2.23132	8.83145	DDR1;ATP6V1G1;ATP6V0B;RGS14;ARPC1B;TNK2;AP2S1;POLR2E;BAIAP2;GIT1	GO Biological Process 2018
regulation of MAP kinase activity (GO:0043405)	4/87	0.0193671	0.244449	4.10619	16.1956	UCHL1;RGS14;APOE;ADRA2A	GO Biological Process 2018
MP:0020220 decreased tear production	2/8	0.00367389	0.255073	28.2675	158.482	ID3;SOD1	MGI Mammalian Phenotype L4
MP:0003980 increased circulating phospholipid level	2/8	0.00367389	0.255073	28.2675	158.482	LPL;APOE	MGI Mammalian Phenotype L4
calcium ion transport into cytosol (GO:0060402)	2/19	0.0206113	0.255853	9.97122	38.7074	GRIN2A;JPH3	GO Biological Process 2018
excitatory postsynaptic potential (GO:0060079)	2/19	0.0206113	0.255853	9.97122	38.7074	GRIN2A;DRD2	GO Biological Process 2018
negative regulation of cellular protein metabolic process (GO:0032269)	4/89	0.0208658	0.256888	4.00917	15.5141	CST3;BAG6;RPL13A;APOE	GO Biological Process 2018
regulation of protein catabolic process (GO:0042176)	4/91	0.0224338	0.266681	3.9166	14.8721	NDUFA13;EGLN2;LRP1;PIN1	GO Biological Process 2018
hydrogen peroxide metabolic process (GO:0042743)	2/20	0.0227265	0.266681	9.41679	35.6352	PRDX5;SOD1	GO Biological Process 2018
adrenergic receptor signaling pathway (GO:0071875)	2/20	0.0227265	0.266681	9.41679	35.6352	DRD2;ADRA2A	GO Biological Process 2018
negative regulation of cyclase activity (GO:0031280)	2/20	0.0227265	0.266681	9.41679	35.6352	PALM;DRD2	GO Biological Process 2018
adenylate cyclase-activating adrenergic receptor signaling pathway (GO:0071880)	2/20	0.0227265	0.266681	9.41679	35.6352	DRD2;ADRA2A	GO Biological Process 2018
negative regulation of adenylate cyclase activity (GO:0007194)	2/20	0.0227265	0.266681	9.41679	35.6352	PALM;DRD2	GO Biological Process 2018
negative regulation of cAMP biosynthetic process (GO:0030818)	2/21	0.024927	0.288003	8.92071	32.9335	PALM;DRD2	GO Biological Process 2018
hepaticobiliary system development (GO:0061008)	2/21	0.024927	0.288003	8.92071	32.9335	PHF2;MET	GO Biological Process 2018
MP:0030005 increased retinal apoptosis	3/29	0.00467071	0.291187	9.81714	52.6832	LAMB2;FOS;SLC4A3	MGI Mammalian Phenotype L4
MP:0009755 impaired behavioral response to alcohol	2/9	0.00468709	0.291187	24.2281	129.934	ADORA2A;DRD2	MGI Mammalian Phenotype L4
MP:0010053 decreased grip strength	11/373	0.00479319	0.291187	2.63212	14.057	NISCH;UCHL1;CHPF;NDUFS7;GT(ROSA)26SOR;GAA;COX4I1;TMEM119;SH3GL2;C1QC;SOD1	MGI Mammalian Phenotype L4
protein targeting to mitochondrion (GO:0006626)	3/54	0.0256044	0.291931	4.99848	18.3194	NDUFA13;NDUFB8;TIMM13	GO Biological Process 2018
regulation of cytoskeleton organization (GO:0051493)	4/95	0.0257805	0.291931	3.74368	13.6949	LRP1;FSCN1;STMN3;BAIAP2	GO Biological Process 2018
positive regulation of protein metabolic process (GO:0051247)	4/96	0.0266616	0.291931	3.7028	13.4209	NDUFA13;EGLN2;LRP1;APOE	GO Biological Process 2018
ciliary basal body-plasma membrane docking (GO:0097711)	4/96	0.0266616	0.291931	3.7028	13.4209	DCTN1;DCTN3;B9D2;TUBB4A	GO Biological Process 2018
positive regulation of cysteine-type endopeptidase activity (GO:2001056)	3/55	0.0268528	0.291931	4.90211	17.7328	NDUFA13;GRIN2A;BAD	GO Biological Process 2018
regulation of microtubule depolymerization (GO:0031114)	2/22	0.0272106	0.291931	8.47425	30.5425	MAP1S;MID1IP1	GO Biological Process 2018
acylglycerol homeostasis (GO:0055090)	2/22	0.0272106	0.291931	8.47425	30.5425	LPL;APOE	GO Biological Process 2018
regulation of membrane protein ectodomain proteolysis (GO:0051043)	2/22	0.0272106	0.291931	8.47425	30.5425	APOE;ADRA2A	GO Biological Process 2018
negative regulation of lyase activity (GO:0051350)	2/22	0.0272106	0.291931	8.47425	30.5425	PALM;DRD2	GO Biological Process 2018
triglyceride catabolic process (GO:0019433)	2/22	0.0272106	0.291931	8.47425	30.5425	LPL;APOE	GO Biological Process 2018
MP:0005014 increased B cell number	6/134	0.00508786	0.296724	4.01958	21.227	SPHK2;ABHD17A;CLPP;LCN2;ID3;APOE	MGI Mammalian Phenotype L4
positive regulation of cell death (GO:0010942)	3/57	0.0294458	0.302188	4.72007	16.6392	LRP1;FOS;FCGR2B	GO Biological Process 2018
cellular nitrogen compound biosynthetic process (GO:0044271)	2/23	0.029575	0.302188	8.0703	28.4141	SPHK2;DDAH2	GO Biological Process 2018
microtubule polymerization or depolymerization (GO:0031109)	2/23	0.029575	0.302188	8.0703	28.4141	TPPP3;STMN3	GO Biological Process 2018
cell-cell adhesion mediated by cadherin (GO:0044331)	2/23	0.029575	0.302188	8.0703	28.4141	CDH6;CDH19	GO Biological Process 2018
regulation of monooxygenase activity (GO:0032768)	2/23	0.029575	0.302188	8.0703	28.4141	DDAH2;NOS1AP	GO Biological Process 2018
cellular response to amyloid-beta (GO:1904646)	2/23	0.029575	0.302188	8.0703	28.4141	LRP1;FCGR2B	GO Biological Process 2018
positive regulation of monooxygenase activity (GO:0032770)	2/23	0.029575	0.302188	8.0703	28.4141	NOS1AP;APOE	GO Biological Process 2018
sterol homeostasis (GO:0055092)	3/58	0.0307902	0.310382	4.63401	16.129	ABCA2;LPL;APOE	GO Biological Process 2018
cholesterol homeostasis (GO:0042632)	3/58	0.0307902	0.310382	4.63401	16.129	ABCA2;LPL;APOE	GO Biological Process 2018
positive regulation of microtubule polymerization (GO:0031116)	2/24	0.0320181	0.313727	7.70308	26.5098	DCTN1;MET	GO Biological Process 2018
regulation of neuronal synaptic plasticity (GO:0048168)	2/24	0.0320181	0.313727	7.70308	26.5098	APOE;DRD2	GO Biological Process 2018
positive regulation of microtubule polymerization or depolymerization (GO:0031112)	2/24	0.0320181	0.313727	7.70308	26.5098	DCTN1;MET	GO Biological Process 2018
negative regulation of proteasomal ubiquitin-dependent protein catabolic process (GO:0032435)	2/24	0.0320181	0.313727	7.70308	26.5098	BAG6;SGTA	GO Biological Process 2018
cell junction assembly (GO:0034329)	3/59	0.0321664	0.313727	4.55103	15.6411	CDH6;FSCN1;CDH19	GO Biological Process 2018
protein stabilization (GO:0050821)	5/152	0.033883	0.322209	2.90121	9.82015	BAG6;CDC37;PEX6;PIN1;PPIB	GO Biological Process 2018
regulation of voltage-gated calcium channel activity (GO:1901385)	2/25	0.0345377	0.322209	7.36779	24.7978	NOS1AP;DRD2	GO Biological Process 2018
long-chain fatty acid transport (GO:0015909)	2/25	0.0345377	0.322209	7.36779	24.7978	MID1IP1;APOE	GO Biological Process 2018
response to amyloid-beta (GO:1904645)	2/25	0.0345377	0.322209	7.36779	24.7978	LRP1;FCGR2B	GO Biological Process 2018
positive regulation of filopodium assembly (GO:0051491)	2/25	0.0345377	0.322209	7.36779	24.7978	PALM;FSCN1	GO Biological Process 2018
positive regulation of nitric oxide biosynthetic process (GO:0045429)	2/25	0.0345377	0.322209	7.36779	24.7978	DDAH2;NOS1AP	GO Biological Process 2018
positive regulation of nitric oxide metabolic process (GO:1904407)	2/25	0.0345377	0.322209	7.36779	24.7978	DDAH2;NOS1AP	GO Biological Process 2018
negative regulation of MAP kinase activity (GO:0043407)	3/61	0.0350138	0.324635	4.39365	14.7276	UCHL1;RGS14;APOE	GO Biological Process 2018
translational elongation (GO:0006414)	4/105	0.0354007	0.326208	3.37131	11.2636	MRPL20;MRPL53;EEF2;MRPL54	GO Biological Process 2018
positive regulation of cellular catabolic process (GO:0031331)	4/106	0.0364624	0.328145	3.33809	11.054	UQCC2;BAD;APOE;ADRA2A	GO Biological Process 2018
positive regulation of catabolic process (GO:0009896)	3/62	0.0364848	0.328145	4.31897	14.2995	NDUFA13;EGLN2;LRP1	GO Biological Process 2018
diterpenoid metabolic process (GO:0016101)	3/62	0.0364848	0.328145	4.31897	14.2995	LRP1;LPL;APOE	GO Biological Process 2018
regulation of actin filament-based process (GO:0032970)	3/62	0.0364848	0.328145	4.31897	14.2995	LRP1;FSCN1;BAIAP2	GO Biological Process 2018
regulation of supramolecular fiber organization (GO:1902903)	2/26	0.0371316	0.331725	7.06044	23.2521	MAP1S;APOE	GO Biological Process 2018
mitochondrial translation (GO:0032543)	4/107	0.0375424	0.331725	3.30551	10.8496	MRPL20;MRPL53;NDUFA7;MRPL54	GO Biological Process 2018
carbohydrate homeostasis (GO:0033500)	3/63	0.0379872	0.331725	4.24677	13.8891	VGF;BAD;ADRA2A	GO Biological Process 2018
adenylate cyclase-inhibiting G-protein coupled receptor signaling pathway (GO:0007193)	3/63	0.0379872	0.331725	4.24677	13.8891	GPR37L1;DRD2;ADRA2A	GO Biological Process 2018
regulation of proteolysis (GO:0030162)	3/63	0.0379872	0.331725	4.24677	13.8891	CST3;BAG6;BAD	GO Biological Process 2018
positive regulation of endocytosis (GO:0045807)	3/64	0.0395207	0.33482	4.17694	13.4954	LRP1;APOE;FCGR2B	GO Biological Process 2018
regulation of calcium ion transmembrane transporter activity (GO:1901019)	2/27	0.0397978	0.33482	6.77768	21.8509	JPH3;ADRA2A	GO Biological Process 2018
negative regulation of microtubule polymerization or depolymerization (GO:0031111)	2/27	0.0397978	0.33482	6.77768	21.8509	MID1IP1;TUBB4A	GO Biological Process 2018
phagosome acidification (GO:0090383)	2/27	0.0397978	0.33482	6.77768	21.8509	ATP6V1G1;ATP6V0B	GO Biological Process 2018
transition metal ion transport (GO:0000041)	2/27	0.0397978	0.33482	6.77768	21.8509	COX17;ATOX1	GO Biological Process 2018
regulation of autophagy of mitochondrion (GO:1903146)	2/27	0.0397978	0.33482	6.77768	21.8509	SREBF1;ZBTB17	GO Biological Process 2018
positive regulation of cellular biosynthetic process (GO:0031328)	5/159	0.039902	0.33482	2.76835	8.91777	SREBF1;DDAH2;MID1IP1;NOS1AP;EEF2	GO Biological Process 2018
MP:0013292 embryonic lethality prior to organogenesis	8/234	0.00660852	0.336847	3.0469	15.2936	DPM3;GPX4;NDUFS7;ZMIZ2;COX4I1;CWC22;TIMM13;DOHH	MGI Mammalian Phenotype L4
MP:0011965 decreased total retina thickness	4/64	0.00680505	0.336847	5.68687	28.378	NDUFA8;LAMB2;PKIG;CSNK1G2	MGI Mammalian Phenotype L4
MP:0009167 increased pancreatic islet number	2/11	0.00705082	0.336847	18.8422	93.3556	BAD;GT(ROSA)26SOR	MGI Mammalian Phenotype L4
MP:0013630 increased bone trabecular spacing	2/11	0.00705082	0.336847	18.8422	93.3556	GT(ROSA)26SOR;PPIB	MGI Mammalian Phenotype L4
MP:0002803 abnormal operant conditioning behavior	2/11	0.00705082	0.336847	18.8422	93.3556	DRD2;GIT1	MGI Mammalian Phenotype L4
MP:0010068 decreased red blood cell distribution width	3/34	0.00732705	0.336847	8.23165	40.4683	PCX;CLPP;AVPI1	MGI Mammalian Phenotype L4
MP:0001399 hyperactivity	14/567	0.00739307	0.336847	2.20081	10.7999	DDR1;ABCA2;COX4I1;ABHD8;CELF4;PTPRK;FOS;ADRA2A;UCHL1;VGF;NOS1AP;FSCN1;APOE;GIT1	MGI Mammalian Phenotype L4
cellular response to insulin stimulus (GO:0032869)	4/110	0.0408918	0.341219	3.21147	10.2665	HDAC5;ATP6V1G1;ATP6V0B;BAIAP2	GO Biological Process 2018
hydrogen ion transmembrane transport (GO:1902600)	2/28	0.0425343	0.343476	6.51667	20.576	COX8A;ATP6V0B	GO Biological Process 2018
negative regulation of homeostatic process (GO:0032845)	2/28	0.0425343	0.343476	6.51667	20.576	TSC22D4;ADRA2A	GO Biological Process 2018
regulation of lipid biosynthetic process (GO:0046890)	2/28	0.0425343	0.343476	6.51667	20.576	MID1IP1;APOE	GO Biological Process 2018
triglyceride homeostasis (GO:0070328)	2/28	0.0425343	0.343476	6.51667	20.576	LPL;APOE	GO Biological Process 2018
aerobic respiration (GO:0009060)	2/28	0.0425343	0.343476	6.51667	20.576	NDUFS7;COX6A1	GO Biological Process 2018
regulation of adenylate cyclase activity (GO:0045761)	2/28	0.0425343	0.343476	6.51667	20.576	PALM;DRD2	GO Biological Process 2018
nervous system development (GO:0007399)	10/455	0.043241	0.347316	1.92959	6.06077	IGSF8;ADORA2A;MAP1S;DCTN1;PCDHGC3;STMN3;MBP;DRD2;CAMK2G;SH3GL2	GO Biological Process 2018
neuron projection morphogenesis (GO:0048812)	5/163	0.0436153	0.348458	2.69772	8.45018	LRFN4;MAP1S;LRRN2;DRD2;BAIAP2	GO Biological Process 2018
MP:0005568 increased circulating total protein level	3/35	0.00794545	0.349746	7.974	38.5555	RAB5C;VGF;ARPC1B	MGI Mammalian Phenotype L4
MP:0002059 abnormal seminal vesicle morphology	6/148	0.00816179	0.349746	3.6207	17.4094	CST3;DPM3;TMEM119;NME2;TIMM13;AP2S1	MGI Mammalian Phenotype L4
MP:0011167 abnormal adipose tissue development	2/12	0.00839583	0.349746	16.9571	81.0552	PHF2;RPLP1	MGI Mammalian Phenotype L4
positive regulation of synaptic transmission (GO:0050806)	3/67	0.044307	0.350217	3.98054	12.4058	GRIN2A;RGS14;TSHZ3	GO Biological Process 2018
insulin receptor signaling pathway (GO:0008286)	3/67	0.044307	0.350217	3.98054	12.4058	ATP6V1G1;ATP6V0B;BAIAP2	GO Biological Process 2018
protein alkylation (GO:0008213)	2/29	0.045339	0.350217	6.275	19.4122	EEF2;SNRPB	GO Biological Process 2018
positive regulation of plasma membrane bounded cell projection assembly (GO:0120034)	3/69	0.0476508	0.350217	3.85952	11.7478	CROCC;PALM;FSCN1	GO Biological Process 2018
regulation of developmental growth (GO:0048638)	2/30	0.04821	0.350217	6.05058	18.3465	APOE;SOD1	GO Biological Process 2018
acylglycerol catabolic process (GO:0046464)	2/30	0.04821	0.350217	6.05058	18.3465	LPL;APOE	GO Biological Process 2018
regulation of ARF protein signal transduction (GO:0032012)	2/30	0.04821	0.350217	6.05058	18.3465	AGAP3;GIT1	GO Biological Process 2018
positive regulation of reactive oxygen species biosynthetic process (GO:1903428)	2/30	0.04821	0.350217	6.05058	18.3465	DDAH2;NOS1AP	GO Biological Process 2018
MP:0008428 abnormal spatial working memory	4/71	0.00976667	0.370533	5.09091	23.5647	GRIN2A;LRRTM1;EIF4H;APOE	MGI Mammalian Phenotype L4
MP:0001258 decreased body length	11/412	0.0097858	0.370533	2.37135	10.9718	PHF2;CLPP;ARPC1B;LRRTM1;SGTA;ABHD8;TMEM119;EIF4H;APOE;DRD2;SH3GL2	MGI Mammalian Phenotype L4
MP:0001697 abnormal embryo size	8/251	0.00987376	0.370533	2.83128	13.0745	ARHGAP33;NDUFS7;LRP1;COX4I1;FSCN1;EIF4H;JUNB;PFDN5	MGI Mammalian Phenotype L4
MP:0000938 motor neuron degeneration	3/38	0.00998097	0.370533	7.28941	33.5829	UCHL1;DCTN1;SOD1	MGI Mammalian Phenotype L4
MP:0005455 increased susceptibility to weight gain	3/39	0.0107205	0.370533	7.08657	32.1418	SELENOM;CELF4;APOE	MGI Mammalian Phenotype L4
MP:0010087 increased circulating fructosamine level	2/14	0.0113987	0.370533	14.1295	63.2188	RAB5C;GALNT18	MGI Mammalian Phenotype L4
MP:0003975 increased circulating VLDL triglyceride level	2/14	0.0113987	0.370533	14.1295	63.2188	LPL;APOE	MGI Mammalian Phenotype L4
MP:0003852 skeletal muscle necrosis	2/14	0.0113987	0.370533	14.1295	63.2188	EGLN2;GT(ROSA)26SOR	MGI Mammalian Phenotype L4
MP:0001004 abnormal retinal photoreceptor morphology	3/40	0.011491	0.370533	6.89469	30.793	LAMB2;GT(ROSA)26SOR;PFDN5	MGI Mammalian Phenotype L4
MP:0004924 abnormal behavior	12/481	0.011781	0.370533	2.21397	9.83281	UCHL1;VGF;LRRN2;ZMIZ2;PPP1R1B;FSCN1;ABHD8;MBP;PTPRK;DRD2;ADRA2A;VAT1L	MGI Mammalian Phenotype L4
MP:0000755 hindlimb paralysis	4/75	0.0117834	0.370533	4.80312	21.331	UCHL1;GAA;FKBP8;MBP	MGI Mammalian Phenotype L4
MP:0008143 abnormal dendrite morphology	4/76	0.0123261	0.370533	4.73617	20.8204	ARHGAP33;EIF4H;APOE;GIT1	MGI Mammalian Phenotype L4
MP:0011940 decreased food intake	5/118	0.0128495	0.370533	3.78068	16.4628	ENHO;TCEAL5;GALNT18;ATP5E;DRD2	MGI Mammalian Phenotype L4
MP:0003329 amyloid beta deposits	2/15	0.0130514	0.370533	13.0419	56.5871	PIN1;APOE	MGI Mammalian Phenotype L4
MP:0004875 increased mean systemic arterial blood pressure	3/42	0.0131254	0.370533	6.54045	28.3411	VGF;GPR37L1;DRD2	MGI Mammalian Phenotype L4
MP:0003135 increased erythroid progenitor cell number	3/43	0.0139898	0.370533	6.37662	27.2245	NCOR2;GT(ROSA)26SOR;LCN2	MGI Mammalian Phenotype L4
MP:0010868 increased bone trabecula number	3/43	0.0139898	0.370533	6.37662	27.2245	NCOR2;APOE;FOS	MGI Mammalian Phenotype L4
MP:0008948 decreased neuron number	3/43	0.0139898	0.370533	6.37662	27.2245	EIF4H;ISLR2;GIT1	MGI Mammalian Phenotype L4
MP:0009542 decreased thymocyte apoptosis	2/16	0.0148015	0.370533	12.1097	51.0187	GT(ROSA)26SOR;LCN2	MGI Mammalian Phenotype L4
MP:0006087 increased body mass index	2/16	0.0148015	0.370533	12.1097	51.0187	ADORA2A;GAA	MGI Mammalian Phenotype L4
MP:0008582 short photoreceptor inner segment	2/16	0.0148015	0.370533	12.1097	51.0187	LAMB2;PFDN5	MGI Mammalian Phenotype L4
MP:0006143 increased systemic arterial diastolic blood pressure	3/44	0.0148858	0.370533	6.22077	26.173	VGF;GPR37L1;DRD2	MGI Mammalian Phenotype L4
MP:0010088 decreased circulating fructosamine level	3/44	0.0148858	0.370533	6.22077	26.173	VGF;GALNT18;CLPP	MGI Mammalian Phenotype L4
MP:0006036 abnormal mitochondrial physiology	4/81	0.0152792	0.370533	4.4275	18.5125	EGLN2;GPX4;GT(ROSA)26SOR;SOD1	MGI Mammalian Phenotype L4
MP:0001053 abnormal neuromuscular synapse morphology	4/82	0.0159187	0.370533	4.37052	18.0951	UCHL1;DCTN1;LAMB2;GT(ROSA)26SOR	MGI Mammalian Phenotype L4
MP:0001923 reduced female fertility	8/274	0.0160309	0.370533	2.58342	10.6779	ABCA2;VGF;GT(ROSA)26SOR;LCN2;EIF4H;PIN1;DRD2;SOD1	MGI Mammalian Phenotype L4
MP:0002997 enlarged seminal vesicle	2/17	0.0166464	0.370533	11.3019	46.2874	NME2;AP2S1	MGI Mammalian Phenotype L4
MP:0005421 loose skin	2/17	0.0166464	0.370533	11.3019	46.2874	PPIB;ATOX1	MGI Mammalian Phenotype L4
MP:0003216 absence seizures	2/17	0.0166464	0.370533	11.3019	46.2874	CELF4;MBP	MGI Mammalian Phenotype L4
MP:0006204 embryonic lethality before implantation	2/17	0.0166464	0.370533	11.3019	46.2874	INTS1;FASN	MGI Mammalian Phenotype L4
MP:0011239 abnormal skin coloration	3/46	0.0167731	0.370533	5.93083	24.2451	NDUFS7;RPLP1;PFDN5	MGI Mammalian Phenotype L4
MP:0004769 abnormal synaptic vesicle morphology	2/18	0.0185839	0.37749	10.595	42.2258	LRRTM1;APOE	MGI Mammalian Phenotype L4
MP:0001650 abnormal seizure response to electrical stimulation	2/18	0.0185839	0.37749	10.595	42.2258	CELF4;FCGR2B	MGI Mammalian Phenotype L4
MP:0008177 increased germinal center B cell number	2/18	0.0185839	0.37749	10.595	42.2258	GT(ROSA)26SOR;FCGR2B	MGI Mammalian Phenotype L4
MP:0000187 abnormal triglyceride level	2/18	0.0185839	0.37749	10.595	42.2258	SREBF1;APOE	MGI Mammalian Phenotype L4
MP:0009503 abnormal mammary gland duct morphology	2/18	0.0185839	0.37749	10.595	42.2258	DDR1;GT(ROSA)26SOR	MGI Mammalian Phenotype L4
MP:0001552 increased circulating triglyceride level	6/178	0.018872	0.37749	2.98461	11.8491	ENHO;VGF;LAMB2;GT(ROSA)26SOR;LPL;APOE	MGI Mammalian Phenotype L4
MP:0004007 abnormal lung vasculature morphology	3/49	0.0198439	0.37749	5.5432	21.7285	ADORA2A;LPL;GIT1	MGI Mammalian Phenotype L4
MP:0000598 abnormal liver morphology	7/233	0.0205368	0.37749	2.65434	10.3135	LRP1;RPLP1;TIMM13;LPL;B9D2;HDDC3;SOD1	MGI Mammalian Phenotype L4
MP:0005560 decreased circulating glucose level	9/343	0.0205409	0.37749	2.31677	9.00142	MAG;SNRK;VGF;GT(ROSA)26SOR;CLPP;GALNT18;SGTA;APOE;ADRA2A	MGI Mammalian Phenotype L4
MP:0001745 increased circulating corticosterone level	3/50	0.0209317	0.37749	5.42498	20.9756	VGF;APOE;DRD2	MGI Mammalian Phenotype L4
MP:0001548 hyperlipidemia	2/20	0.0227265	0.37749	9.41679	35.6352	LPL;APOE	MGI Mammalian Phenotype L4
MP:0005145 increased circulating VLDL cholesterol level	2/20	0.0227265	0.37749	9.41679	35.6352	LPL;APOE	MGI Mammalian Phenotype L4
MP:0011409 increased renal glomerulus basement membrane thickness	2/20	0.0227265	0.37749	9.41679	35.6352	DDR1;LAMB2	MGI Mammalian Phenotype L4
MP:0001696 failure to gastrulate	3/52	0.0232037	0.37749	5.20303	19.5813	ZBTB17;NDUFA13;GPX4	MGI Mammalian Phenotype L4
MP:0004543 abnormal sperm physiology	3/53	0.024388	0.37749	5.09871	18.9349	CST3;GPX4;TALDO1	MGI Mammalian Phenotype L4
MP:0010831 lethality, incomplete penetrance	3/53	0.024388	0.37749	5.09871	18.9349	SGTA;BMYC;SOD1	MGI Mammalian Phenotype L4
MP:0011630 increased mitochondria size	2/21	0.024927	0.37749	8.92071	32.9335	GT(ROSA)26SOR;CLPP	MGI Mammalian Phenotype L4
MP:0008916 abnormal astrocyte physiology	2/21	0.024927	0.37749	8.92071	32.9335	APOE;DRD2	MGI Mammalian Phenotype L4
MP:0006059 decreased susceptibility to ischemic brain injury	2/21	0.024927	0.37749	8.92071	32.9335	CST3;ADORA2A	MGI Mammalian Phenotype L4
MP:0002727 decreased circulating insulin level	8/301	0.0263421	0.37749	2.34211	8.51728	NCOR2;MAG;VGF;BAD;GT(ROSA)26SOR;ARPC1B;GALNT18;TMEM119	MGI Mammalian Phenotype L4
MP:0000953 abnormal oligodendrocyte morphology	2/22	0.0272106	0.37749	8.47425	30.5425	MAG;MBP	MGI Mammalian Phenotype L4
MP:0013986 abnormal vitelline vein topology	2/22	0.0272106	0.37749	8.47425	30.5425	CELF4;B9D2	MGI Mammalian Phenotype L4
MP:0010875 increased bone volume	2/22	0.0272106	0.37749	8.47425	30.5425	GT(ROSA)26SOR;FOS	MGI Mammalian Phenotype L4
MP:0002797 increased thigmotaxis	3/56	0.0281333	0.37749	4.80937	17.1733	LRRTM1;APOE;DLGAP3	MGI Mammalian Phenotype L4
MP:0001973 increased thermal nociceptive threshold	4/98	0.0284773	0.37749	3.62365	12.8953	UCHL1;ADORA2A;GT(ROSA)26SOR;SOD1	MGI Mammalian Phenotype L4
MP:0002574 increased vertical activity	4/99	0.0294121	0.37749	3.58533	12.6431	ABCA2;LRRTM1;NOS1AP;CKB	MGI Mammalian Phenotype L4
MP:0009936 abnormal dendritic spine morphology	3/57	0.0294458	0.37749	4.72007	16.6392	LRRTM1;EIF4H;GIT1	MGI Mammalian Phenotype L4
MP:0002824 abnormal chorioallantoic fusion	2/23	0.029575	0.37749	8.0703	28.4141	NDUFS7;CWC22	MGI Mammalian Phenotype L4
MP:0003043 hypoalgesia	2/23	0.029575	0.37749	8.0703	28.4141	ADORA2A;TAC1	MGI Mammalian Phenotype L4
MP:0004929 decreased epididymis weight	2/23	0.029575	0.37749	8.0703	28.4141	GT(ROSA)26SOR;BMYC	MGI Mammalian Phenotype L4
MP:0000065 abnormal bone marrow cavity morphology	2/23	0.029575	0.37749	8.0703	28.4141	NCOR2;FOS	MGI Mammalian Phenotype L4
MP:0003385 abnormal body wall morphology	2/23	0.029575	0.37749	8.0703	28.4141	LRP1;PFDN5	MGI Mammalian Phenotype L4
MP:0008840 abnormal spike wave discharge	2/23	0.029575	0.37749	8.0703	28.4141	CELF4;ADRA2A	MGI Mammalian Phenotype L4
MP:0011094 embryonic lethality before implantation, complete penetrance	5/147	0.0299521	0.37749	3.00413	10.539	FBL;INTS1;RGS14;FASN;TKT	MGI Mammalian Phenotype L4
MP:0010869 decreased bone trabecula number	3/58	0.0307902	0.37749	4.63401	16.129	GT(ROSA)26SOR;TMEM119;PPIB	MGI Mammalian Phenotype L4
MP:0003063 increased coping response	2/24	0.0320181	0.37749	7.70308	26.5098	UCHL1;TAC1	MGI Mammalian Phenotype L4
MP:0000277 abnormal heart shape	2/24	0.0320181	0.37749	7.70308	26.5098	GAA;AP2S1	MGI Mammalian Phenotype L4
MP:0004859 abnormal synaptic plasticity	2/24	0.0320181	0.37749	7.70308	26.5098	UCHL1;RGS14	MGI Mammalian Phenotype L4
MP:0002206 abnormal CNS synaptic transmission	4/103	0.0333319	0.37749	3.43977	11.6995	MBP;DRD2;BAIAP2;GIT1	MGI Mammalian Phenotype L4
MP:0008874 decreased physiological sensitivity to xenobiotic	5/152	0.033883	0.37749	2.90121	9.82015	ADORA2A;SPHK2;PPP1R1B;LCN2;DRD2	MGI Mammalian Phenotype L4
MP:0003949 abnormal circulating lipid level	2/25	0.0345377	0.37749	7.36779	24.7978	GT(ROSA)26SOR;APOE	MGI Mammalian Phenotype L4
MP:0009712 impaired conditioned place preference behavior	2/25	0.0345377	0.37749	7.36779	24.7978	PPP1R1B;DRD2	MGI Mammalian Phenotype L4
MP:0004835 abnormal miniature endplate potential	2/25	0.0345377	0.37749	7.36779	24.7978	UCHL1;LAMB2	MGI Mammalian Phenotype L4
MP:0000484 abnormal pulmonary artery morphology	2/25	0.0345377	0.37749	7.36779	24.7978	ADORA2A;GT(ROSA)26SOR	MGI Mammalian Phenotype L4
MP:0000249 abnormal blood vessel physiology	2/25	0.0345377	0.37749	7.36779	24.7978	INF2;APOE	MGI Mammalian Phenotype L4
MP:0000940 abnormal motor neuron innervation pattern	2/25	0.0345377	0.37749	7.36779	24.7978	MET;SOD1	MGI Mammalian Phenotype L4
MP:0005658 increased susceptibility to diet-induced obesity	3/61	0.0350138	0.37749	4.39365	14.7276	NCOR2;GT(ROSA)26SOR;LCN2	MGI Mammalian Phenotype L4
MP:0002882 abnormal neuron morphology	4/105	0.0354007	0.37749	3.37131	11.2636	ARHGAP33;ISLR2;MBP;APOE	MGI Mammalian Phenotype L4
MP:0000182 increased circulating LDL cholesterol level	3/62	0.0364848	0.37749	4.31897	14.2995	CLPP;LCN2;APOE	MGI Mammalian Phenotype L4
MP:0004163 abnormal adenohypophysis morphology	2/26	0.0371316	0.37749	7.06044	23.2521	B9D2;DRD2	MGI Mammalian Phenotype L4
MP:0002680 decreased corpora lutea number	2/26	0.0371316	0.37749	7.06044	23.2521	CLPP;SOD1	MGI Mammalian Phenotype L4
MP:0000278 abnormal myocardial fiber morphology	4/107	0.0375424	0.37749	3.30551	10.8496	MAP1S;GT(ROSA)26SOR;GAA;PLEC	MGI Mammalian Phenotype L4
MP:0004811 abnormal neuron physiology	4/107	0.0375424	0.37749	3.30551	10.8496	RGS14;DRD2;MET;SOD1	MGI Mammalian Phenotype L4
MP:0002591 decreased mean corpuscular volume	5/157	0.0381203	0.37749	2.80506	9.16417	UQCRQ;GT(ROSA)26SOR;RCC2;ARPC1B;BOLA2	MGI Mammalian Phenotype L4
MP:0000961 abnormal dorsal root ganglion morphology	3/64	0.0395207	0.37749	4.17694	13.4954	UCHL1;FKBP8;ISLR2	MGI Mammalian Phenotype L4
MP:0001262 decreased body weight	25/1471	0.0401989	0.37749	1.50818	4.84717	PHF2;GT(ROSA)26SOR;BMYC;UCHL1;PCSK1N;EIF4H;MBP;APOE;DRD2;GIT1;ABCA2;MAP2K2;LAMB2;SGTA;FOS;SOD1;NISCH;NCOR2;VGF;TMEM119;PIN1;TKT;PPIB;FCGR2B;PLEC	MGI Mammalian Phenotype L4
MP:0010097 abnormal retinal blood vessel morphology	3/65	0.0410853	0.37749	4.10936	13.1175	NDUFA8;GT(ROSA)26SOR;NOS1AP	MGI Mammalian Phenotype L4
MP:0005534 decreased body temperature	3/65	0.0410853	0.37749	4.10936	13.1175	NCOR2;DRD2;ATOX1	MGI Mammalian Phenotype L4
MP:0003960 increased lean body mass	7/271	0.0415358	0.37749	2.26786	7.21451	IGSF8;VGF;GT(ROSA)26SOR;GALNT18;NOS1AP;CKB;FAHD2A	MGI Mammalian Phenotype L4
MP:0009832 abnormal sperm mitochondrial sheath morphology	2/28	0.0425343	0.37749	6.51667	20.576	GPX4;TALDO1	MGI Mammalian Phenotype L4
MP:0003953 abnormal hormone level	2/28	0.0425343	0.37749	6.51667	20.576	NCOR2;GT(ROSA)26SOR	MGI Mammalian Phenotype L4
MP:0008450 retinal photoreceptor degeneration	3/67	0.044307	0.37749	3.98054	12.4058	GT(ROSA)26SOR;CROCC;PFDN5	MGI Mammalian Phenotype L4
MP:0008553 increased circulating tumor necrosis factor level	3/67	0.044307	0.37749	3.98054	12.4058	GT(ROSA)26SOR;FOS;SOD1	MGI Mammalian Phenotype L4
MP:0013279 increased fasting circulating glucose level	4/113	0.0444056	0.37749	3.1226	9.725	ENHO;RCC2;LCN2;AVPI1	MGI Mammalian Phenotype L4
MP:0003858 enhanced coordination	2/29	0.045339	0.37749	6.275	19.4122	ABCA2;GPR37L1	MGI Mammalian Phenotype L4
MP:0009640 abnormal renal tubule epithelium morphology	2/29	0.045339	0.37749	6.275	19.4122	DDR1;LAMB2	MGI Mammalian Phenotype L4
MP:0011346 renal tubule atrophy	2/29	0.045339	0.37749	6.275	19.4122	GRHPR;GT(ROSA)26SOR	MGI Mammalian Phenotype L4
MP:0001260 increased body weight	7/278	0.0465236	0.37749	2.20849	6.77519	ENHO;SELENOM;GT(ROSA)26SOR;CELF4;LPL;DRD2;SPTBN2	MGI Mammalian Phenotype L4
MP:0006144 increased systemic arterial systolic blood pressure	3/69	0.0476508	0.37749	3.85952	11.7478	VGF;GPR37L1;DRD2	MGI Mammalian Phenotype L4
MP:0003924 diaphragmatic hernia	2/30	0.04821	0.37749	6.05058	18.3465	LRP1;MET	MGI Mammalian Phenotype L4
MP:0000639 abnormal adrenal gland morphology	2/30	0.04821	0.37749	6.05058	18.3465	APOE;B9D2	MGI Mammalian Phenotype L4
MP:0000188 abnormal circulating glucose level	2/30	0.04821	0.37749	6.05058	18.3465	BAD;RPL13A	MGI Mammalian Phenotype L4

## Sheet: F. Enrichment Pathways
EnrichR results for Pathways of genes common between Cortex and Striatum
red highlight: adj P-value < 0.05; blue highlight: P-value <0.05
Term	Overlap	P-value	Adjusted P-value	Odds Ratio	Combined Score	Genes	Category
Oxidative phosphorylation	21/134	6.49633e-18	8.63538e-16	17.0661	675.395	COX8A;NDUFA8;NDUFA13;ATP6V1G1;ATP6V0B;NDUFB8;NDUFA7;NDUFB7;NDUFB10;NDUFB6;NDUFB11;COX4I1;COX17;NDUFA2;NDUFC2;UQCR11;COX6A1;NDUFS7;UQCRQ;ATP5E;NDUFV1	KEGG pathways Mouse 2019
Alzheimer disease	23/175	9.48943e-18	8.63538e-16	13.9989	548.704	COX8A;NDUFA8;NDUFA13;NDUFB8;NDUFA7;NDUFB7;NDUFB10;LRP1;NDUFB6;NDUFB11;BAD;COX4I1;NDUFA2;LPL;NDUFC2;UQCR11;COX6A1;GRIN2A;NDUFS7;UQCRQ;ATP5E;APOE;NDUFV1	KEGG pathways Mouse 2019
Parkinson disease	21/144	2.99806e-17	1.81882e-15	15.6706	596.204	COX8A;NDUFA8;NDUFA13;NDUFB8;NDUFA7;NDUFB7;NDUFB10;NDUFB6;NDUFB11;COX4I1;NDUFA2;NDUFC2;UQCR11;COX6A1;UCHL1;NDUFS7;ADORA2A;UQCRQ;ATP5E;DRD2;NDUFV1	KEGG pathways Mouse 2019
Huntington disease	22/192	9.66408e-16	4.39716e-14	11.9053	411.6	COX8A;NDUFA8;NDUFA13;NDUFB8;NDUFA7;NDUFB7;NDUFB10;NDUFB6;NDUFB11;DCTN1;COX4I1;NDUFA2;NDUFC2;UQCR11;COX6A1;SOD1;NDUFS7;UQCRQ;ATP5E;AP2S1;POLR2E;NDUFV1	KEGG pathways Mouse 2019
Electron Transport Chain WP295	16/103	7.17194e-14	7.10022e-12	16.5249	500.141	COX8A;NDUFA8;NDUFA7;NDUFB7;NDUFB10;NDUFB6;COX4I1;COX17;NDUFA2;NDUFC2;UQCR11;COX6A1;NDUFS7;UQCRQ;ATP5E;NDUFV1	WikiPathways Mouse 2019
Non-alcoholic fatty liver disease (NAFLD)	18/151	2.15228e-13	7.8343e-12	12.2441	357.124	COX8A;SREBF1;NDUFA8;NDUFA13;NDUFB8;NDUFA7;NDUFB7;NDUFB10;NDUFB6;NDUFB11;COX4I1;NDUFA2;NDUFC2;UQCR11;COX6A1;NDUFS7;UQCRQ;NDUFV1	KEGG pathways Mouse 2019
Thermogenesis	19/231	3.55094e-11	1.07712e-09	8.11292	195.207	COX8A;NDUFA8;NDUFA13;NDUFB8;NDUFA7;NDUFB7;NDUFB10;NDUFB6;NDUFB11;COX4I1;COX17;NDUFA2;NDUFC2;UQCR11;COX6A1;NDUFS7;UQCRQ;ATP5E;NDUFV1	KEGG pathways Mouse 2019
Oxidative phosphorylation WP1248	11/62	1.39917e-10	6.92589e-09	18.9823	430.708	NDUFA8;NDUFB8;NDUFA7;NDUFB7;NDUFS7;NDUFB6;NDUFB10;ATP5E;NDUFA2;NDUFC2;NDUFV1	WikiPathways Mouse 2019
Retrograde endocannabinoid signaling	12/150	2.16196e-07	5.6211e-06	7.65334	117.456	NDUFA8;NDUFA13;NDUFB8;NDUFA7;NDUFB7;NDUFB10;NDUFS7;NDUFB6;NDUFB11;NDUFA2;NDUFC2;NDUFV1	KEGG pathways Mouse 2019
Cytoplasmic Ribosomal Proteins WP163	9/92	1.36446e-06	4.50272e-05	9.44333	127.53	RPS26;RPLP1;RPS5;RPLP0;RPLP2;RPL13A;FAU;RPL8;RPS21	WikiPathways Mouse 2019
Ribosome	10/170	3.40932e-05	0.000775621	5.44583	56.0181	RPS26;MRPL20;RPS5;RPLP1;RPLP0;RPLP2;RPL13A;FAU;RPL8;RPS21	KEGG pathways Mouse 2019
Hypothetical Network for Drug Addiction WP1246	4/31	0.000455599	0.0112761	12.6586	97.3944	NISCH;GRIN2A;MAP2K2;DRD2	WikiPathways Mouse 2019
Renal cell carcinoma	5/68	0.00122552	0.0247827	6.79848	45.5797	MAP2K2;EGLN2;BAD;ELOB;MET	KEGG pathways Mouse 2019
Statin Pathway WP1	3/19	0.00135037	0.0267374	15.9609	105.46	LRP1;LPL;APOE	WikiPathways Mouse 2019
Alzheimers Disease WP2075	5/75	0.00189897	0.031333	6.11646	38.3284	GRIN2A;LRP1;BAD;LPL;APOE	WikiPathways Mouse 2019
Pentose Phosphate Pathway WP63	2/7	0.00277688	0.0346728	33.9227	199.684	TALDO1;TKT	WikiPathways Mouse 2019
Selenium metabolism/Selenoproteins WP108	4/50	0.00280185	0.0346728	7.42292	43.6281	SELENOM;GPX4;FOS;SELENOH	WikiPathways Mouse 2019
Novel Jun-Dmp1 Pathway WP3654	3/26	0.00341051	0.0375156	11.0993	63.0541	MAP2K2;FOS;JUNB	WikiPathways Mouse 2019
Cardiac muscle contraction	5/78	0.00225779	0.0410917	5.8642	35.7328	COX8A;UQCRQ;COX4I1;UQCR11;COX6A1	KEGG pathways Mouse 2019
Oxidative Stress WP412	3/28	0.00422376	0.0418153	10.2103	55.8202	FOS;JUNB;SOD1	WikiPathways Mouse 2019
EGFR1 Signaling Pathway WP572	7/178	0.00517579	0.0465821	3.51795	18.5177	NDUFA13;MAP2K2;TNK2;FOS;SH3GL2;GIT1;PLEC	WikiPathways Mouse 2019
cAMP signaling pathway	8/211	0.00357884	0.0592136	3.39611	19.1293	GRIN2A;MAP2K2;ADORA2A;BAD;PPP1R1B;FOS;DRD2;CAMK2G	KEGG pathways Mouse 2019
Signaling of Hepatocyte Growth Factor Receptor WP193	3/34	0.00732705	0.0604482	8.23165	40.4683	MAP2K2;FOS;MET	WikiPathways Mouse 2019
Alpha6-Beta4 Integrin Signaling Pathway WP488	4/67	0.00798879	0.0608377	5.41524	26.1541	BAD;LAMB2;MET;PLEC	WikiPathways Mouse 2019
Oxidative Damage WP1496	3/42	0.0131254	0.0928154	6.54045	28.3411	BAD;TNK2;C1QC	WikiPathways Mouse 2019
Prion diseases	3/34	0.00732705	0.111127	8.23165	40.4683	MAP2K2;SOD1;C1QC	KEGG pathways Mouse 2019
Amphetamine addiction	4/68	0.0084115	0.117761	5.33036	25.4693	GRIN2A;PPP1R1B;FOS;CAMK2G	KEGG pathways Mouse 2019
Serotonin and anxiety WP2141	2/18	0.0185839	0.122653	10.595	42.2258	FOS;EEF2	WikiPathways Mouse 2019
Translation Factors WP307	3/50	0.0209317	0.123016	5.42498	20.9756	EIF4H;EIF2S3Y;EEF2	WikiPathways Mouse 2019
Adipogenesis genes WP447	5/134	0.021124	0.123016	3.30907	12.7642	NCOR2;SREBF1;LPL;ID3;RXRG	WikiPathways Mouse 2019
Fatty Acid Biosynthesis WP336	2/22	0.0272106	0.149658	8.47425	30.5425	PCX;FASN	WikiPathways Mouse 2019
Spinal Cord Injury WP2432	4/99	0.0294121	0.153252	3.58533	12.6431	MAG;MBP;FOS;FCGR2B	WikiPathways Mouse 2019
Neural Crest Differentiation WP2074	4/101	0.0313358	0.155112	3.51105	12.1587	CDH6;HDAC5;MBP;BMYC	WikiPathways Mouse 2019
Synaptic vesicle cycle	4/77	0.0128847	0.167501	4.67105	20.3271	ATP6V1G1;ATP6V0B;SLC6A7;AP2S1	KEGG pathways Mouse 2019
Dysregulated miRNA Targeting in Insulin/PI3K-AKT Signaling WP3855	2/26	0.0371316	0.175049	7.06044	23.2521	BAD;FASN	WikiPathways Mouse 2019
Gap junction	4/86	0.0186436	0.190084	4.15648	16.5522	MAP2K2;TUBB3;DRD2;TUBB4A	KEGG pathways Mouse 2019
Cocaine addiction	3/48	0.0187882	0.190084	5.66667	22.5223	GRIN2A;PPP1R1B;DRD2	KEGG pathways Mouse 2019
Tuberculosis	6/178	0.018872	0.190084	2.98461	11.8491	ATP6V0B;RAB5C;SPHK2;BAD;FCGR2B;CAMK2G	KEGG pathways Mouse 2019
Phagosome	6/180	0.019819	0.190084	2.95001	11.5673	ATP6V1G1;ATP6V0B;RAB5C;TUBB3;FCGR2B;TUBB4A	KEGG pathways Mouse 2019
Cholesterol metabolism	3/49	0.0198439	0.190084	5.5432	21.7285	LRP1;LPL;APOE	KEGG pathways Mouse 2019
MAPK Cascade WP251	2/28	0.0425343	0.191404	6.51667	20.576	MAP2K2;MBP	WikiPathways Mouse 2019
Dopaminergic synapse	5/135	0.0217336	0.197776	3.28344	12.572	GRIN2A;PPP1R1B;FOS;DRD2;CAMK2G	KEGG pathways Mouse 2019
Amyotrophic lateral sclerosis (ALS)	3/52	0.0232037	0.201099	5.20303	19.5813	GRIN2A;BAD;SOD1	KEGG pathways Mouse 2019
Circadian entrainment	4/99	0.0294121	0.243318	3.58533	12.6431	GRIN2A;NOS1AP;FOS;CAMK2G	KEGG pathways Mouse 2019
VEGF signaling pathway	3/58	0.0307902	0.243644	4.63401	16.129	MAP2K2;SPHK2;BAD	KEGG pathways Mouse 2019
HIF-1 signaling pathway	4/104	0.0343572	0.258738	3.40519	11.4787	MAP2K2;EGLN2;ELOB;CAMK2G	KEGG pathways Mouse 2019
Oxytocin signaling pathway	5/154	0.0355409	0.258738	2.86198	9.55063	KCNJ4;MAP2K2;FOS;EEF2;CAMK2G	KEGG pathways Mouse 2019
Rap1 signaling pathway	6/209	0.0373302	0.261311	2.52483	8.30154	GRIN2A;MAP2K2;ADORA2A;RGS14;DRD2;MET	KEGG pathways Mouse 2019
Non-small cell lung cancer	3/66	0.0426808	0.2877	4.04392	12.7546	MAP2K2;BAD;RXRG	KEGG pathways Mouse 2019
Long-term potentiation	3/67	0.044307	0.287996	3.98054	12.4058	GRIN2A;MAP2K2;CAMK2G	KEGG pathways Mouse 2019

## Sheet: G. Enrichment Diseases
EnrichR results forDisease Categories of genes common between Cortex and Striatum
red highlight: adj P-value < 0.05; blue highlight: P-value <0.05
Term	Overlap	P-value	Adjusted P-value	Odds Ratio	Combined Score	Genes	Category
Mitochondrial Diseases	19/384	1.54385e-07	0.000494648	4.67529	73.3264	COX8A;NDUFA8;NDUFA13;NDUFB8;NDUFA7;NDUFB7;NDUFB10;NDUFB6;NDUFB11;UQCC2;COX4I1;NDUFA2;NDUFC2;COX6A1;NDUFS7;UQCRQ;CLPP;BOLA2;NDUFV1	DisGeNET
Huntington's disease	8/76	3.0572e-06	0.00101805	10.2083	129.626	GRIN2A;JPH3;SYNDIG1L;PENK;PPP1R1B;DRD2;TAC1;SOD1	Jensen DISEASES
Huntington Disease	23/627	1.50443e-06	0.00224927	3.4417	46.1432	MAP2K2;GPX4;MAP1S;METRN;SPHK2;GPR52;LPL;SOD1;ENHO;GRIN2A;UCHL1;JPH3;ADORA2A;PENK;PPP1R1B;MBP;APOE;CKB;DRD2;TAC1;GIT1;SLC12A9;SPTBN2	DisGeNET
Abnormal behavior	17/372	2.10606e-06	0.00224927	4.26373	55.7299	HDAC5;DCTN1;GPR52;CELF4;BAIAP2;TUBB4A;ADRA2A;SOD1;GRIN2A;VGF;PEX6;NOS1AP;MAP3K10;APOE;DLGAP3;DRD2;TAC1	DisGeNET
Alopecia areata	6/56	4.90588e-05	0.00816828	10.331	102.509	DDR1;BAG6;RPS26;PRDX5;BAD;PRRC2A	Jensen DISEASES
nervous system disorder	17/436	1.70177e-05	0.0136312	3.60056	39.5386	ABCA2;METRN;DCTN1;CELF4;FOS;SLC4A3;TUBB4A;SOD1;CST3;PRDX5;UCHL1;PEX6;PENK;ID3;APOE;DRD2;NDUFV1	DisGeNET
Neurodegenerative Disorders	22/745	7.24988e-05	0.0343899	2.7203	25.9298	METRN;DCTN1;GAA;LPL;FOS;TUBB4A;SOD1;CST3;BAG6;UCHL1;TPPP3;PCSK1N;JPH3;ADORA2A;NDUFS7;LCN2;PIN1;MBP;APOE;TAC1;JUNB;SPTBN2	DisGeNET
Bradykinesia	6/61	7.98951e-05	0.0343899	9.38944	88.5875	GRIN2A;JPH3;DCTN1;PPP1R1B;APOE;DRD2	DisGeNET
Infarction, Middle Cerebral Artery	8/119	8.2507e-05	0.0343899	6.24011	58.6734	HDAC5;MAG;SPHK2;BAD;APOE;FOS;JUNB;SOD1	DisGeNET
Oral Dyskinesia	3/8	8.58673e-05	0.0343899	51.1034	478.467	PENK;PPP1R1B;DRD2	DisGeNET
Cryptogenic Chronic Hepatitis	4/23	0.000138019	0.0453231	17.9959	159.95	COX17;MET;ATOX1;SOD1	DisGeNET
Parkinson Disease	27/1064	0.000141458	0.0453231	2.3443	20.7787	LRP1;DCTN1;CST3;GRIN2A;PRDX5;UCHL1;JPH3;PENK;CWC22;MBP;APOE;DRD2;TAC1;SH3GL2;KCNJ4;SREBF1;MAP1S;LAMB2;TNK2;NDUFA2;TALDO1;TUBB4A;SOD1;MAG;ADORA2A;PIN1;CSNK1G2	DisGeNET
Apathy	4/27	0.000263644	0.070393	14.8632	122.486	JPH3;DCTN1;APOE;SOD1	DisGeNET
Aphasia	4/27	0.000263644	0.070393	14.8632	122.486	GRIN2A;GAA;APOE;PLEC	DisGeNET
Chronic Persistent Hepatitis	4/32	0.00051592	0.105436	12.2059	92.3936	COX17;MET;ATOX1;SOD1	DisGeNET
NADH:Q(1) Oxidoreductase deficiency	4/32	0.00051592	0.105436	12.2059	92.3936	NDUFB10;NDUFS7;NDUFB11;NDUFV1	DisGeNET
Muscle Rigidity	7/119	0.000519433	0.105436	5.38734	40.7432	SREBF1;JPH3;DCTN1;FSCN1;APOE;DRD2;SOD1	DisGeNET
Hyperkinesia, Generalized	4/33	0.00058171	0.105436	11.7844	87.7887	ADORA2A;FOS;DRD2;GIT1	DisGeNET
MITOCHONDRIAL COMPLEX I DEFICIENCY	4/33	0.00058171	0.105436	11.7844	87.7887	NDUFA13;NDUFS7;NDUFB11;NDUFV1	DisGeNET
Substance Withdrawal Syndrome	5/58	0.000592337	0.105436	8.08532	60.0855	GRIN2A;ADORA2A;PPP1R1B;FOS;DRD2	DisGeNET
Hypotension	6/89	0.000636491	0.107332	6.21308	45.7254	NISCH;ADORA2A;DRD2;TAC1;ADRA2A;SOD1	DisGeNET
AURAL ATRESIA, CONGENITAL	5/60	0.000692727	0.110975	7.79051	56.675	DDR1;CST3;LRP1;MBP;APOE	DisGeNET
Vocal Cord Paralysis	3/17	0.000964201	0.134317	18.2429	126.683	DCTN1;TUBB3;SOD1	DisGeNET
Hyperkeratosis lenticularis perstans	3/17	0.000964201	0.134317	18.2429	126.683	SREBF1;LPL;APOE	DisGeNET
Macroangiopathy	3/17	0.000964201	0.134317	18.2429	126.683	LPL;APOE;SOD1	DisGeNET
Pyuria	2/5	0.00134303	0.149076	56.5436	373.913	BCKDHA;LCN2	Jensen DISEASES
Major Depressive Disorder	15/513	0.0011455	0.152924	2.63787	17.8634	HDAC5;LRP1;FOS;ADRA2A;SOD1;GRIN2A;MAG;VGF;PPP1R1B;APOE;DRD2;TAC1;JUNB;NDUFV1;MET	DisGeNET
Migraine with Aura	5/68	0.00122552	0.157063	6.79848	45.5797	ADORA2A;LRP1;APOE;DRD2;SOD1	DisGeNET
Amyloid angiopathy	3/19	0.00135037	0.160244	15.9609	105.46	DDR1;CST3;APOE	DisGeNET
Massive Osteolyses	3/19	0.00135037	0.160244	15.9609	105.46	GAA;APOE;ADRA2A	DisGeNET
Pick Disease of the Brain	6/105	0.00150929	0.161286	5.20471	33.8104	PCSK1N;PENK;PIN1;APOE;CKB;SOD1	DisGeNET
Overnutrition	3/20	0.00157497	0.161286	15.0213	96.9402	SREBF1;FASN;LPL	DisGeNET
Panic Attacks	3/20	0.00157497	0.161286	15.0213	96.9402	ADORA2A;DRD2;ADRA2A	DisGeNET
Attention Deficit Disorder	5/73	0.00168419	0.161286	6.29699	40.2156	HDAC5;APOE;DRD2;GIT1;ADRA2A	DisGeNET
Memory Disorders	4/44	0.00174465	0.161286	8.53896	54.2326	SPHK2;APOE;DRD2;GIT1	DisGeNET
Hodgkin Disease	16/592	0.00177922	0.161286	2.43392	15.4105	DDR1;MAP1S;BAD;LPL;FOS;PRRC2A;NCOR2;BAG6;ENHO;UCHL1;PENK;FSCN1;APOE;JUNB;MET;SLC12A9	DisGeNET
Cerebrovascular accident	19/768	0.00188433	0.161286	2.23325	14.0118	GPX4;LRP1;SPHK2;LPL;NDUFC2;SERPINA9;PRRC2A;SOD1;CST3;GRIN2A;MAG;JPH3;DDAH2;PPP1R1B;LCN2;PIN1;MBP;APOE;TAC1	DisGeNET
Obesity, Visceral	4/45	0.00189743	0.161286	8.33027	52.208	SREBF1;JPH3;LPL;APOE	DisGeNET
Cerebral Amyloid Angiopathy	4/45	0.00189743	0.161286	8.33027	52.208	DDR1;CST3;MBP;APOE	DisGeNET
Shy-Drager Syndrome	5/75	0.00189897	0.161286	6.11646	38.3284	CST3;UCHL1;PRDX5;MBP;APOE	DisGeNET
Cirrhosis	13/433	0.00191922	0.161286	2.69718	16.8731	DDR1;COX8A;GPX4;TALDO1;SCAF1;ADRA2A;FBL;GRIN2A;LCN2;APOE;TAC1;MET;SLC12A9	DisGeNET
Mild cognitive disorder	7/150	0.00200939	0.161286	4.2128	26.1611	DDR1;CST3;ADORA2A;LCN2;PIN1;APOE;SOD1	DisGeNET
Machado-Joseph Disease	5/76	0.00201356	0.161286	6.03001	37.4334	CST3;PPP1R1B;APOE;SPTBN2;SOD1	DisGeNET
Severe depression	3/22	0.00209109	0.163411	13.4387	82.918	NOS1AP;APOE;DRD2	DisGeNET
Dyskinetic syndrome	5/78	0.00225779	0.166243	5.8642	35.7328	ADORA2A;PENK;PPP1R1B;APOE;DRD2	DisGeNET
Carcinoma, Cribriform	6/115	0.00239547	0.166243	4.72481	28.5103	DDR1;ID3;APOE;CKB;EEF2;MET	DisGeNET
Carcinoma, Granular Cell	6/115	0.00239547	0.166243	4.72481	28.5103	DDR1;ID3;APOE;CKB;EEF2;MET	DisGeNET
Cytochrome-c Oxidase Deficiency	4/48	0.00241091	0.166243	7.76112	46.7821	COX8A;COX4I1;COX6A1;SOD1	DisGeNET
Dementia, Vascular	5/80	0.0025229	0.166243	5.70725	34.1427	CST3;ADORA2A;PENK;LCN2;APOE	DisGeNET
Adenocarcinoma, Basal Cell	6/117	0.00261172	0.166243	4.63921	27.5928	DDR1;ID3;APOE;CKB;EEF2;MET	DisGeNET
Asterixis	2/7	0.00277688	0.166243	33.9227	199.684	PPP1R1B;DRD2	DisGeNET
Ballismus	2/7	0.00277688	0.166243	33.9227	199.684	PPP1R1B;DRD2	DisGeNET
Familial Motor Neuron Disease	2/7	0.00277688	0.166243	33.9227	199.684	DCTN1;SOD1	DisGeNET
Hemiballismus	2/7	0.00277688	0.166243	33.9227	199.684	PPP1R1B;DRD2	DisGeNET
Memory performance	2/7	0.00277688	0.166243	33.9227	199.684	APOE;BAIAP2	DisGeNET
NADH cytochrome B5 reductase deficiency	2/7	0.00277688	0.166243	33.9227	199.684	LPL;APOE	DisGeNET
Opiate Addiction	4/50	0.00280185	0.166243	7.42292	43.6281	GRIN2A;PENK;PPP1R1B;DRD2	DisGeNET
Charcot-Marie-Tooth Disease	10/298	0.00286475	0.166425	3.00571	17.5993	MAG;INF2;MAP2K2;TUBB3;DCTN1;GAA;MBP;COX6A1;SPTBN2;SOD1	DisGeNET
Dystonia	9/251	0.00297142	0.166425	3.21266	18.6936	JPH3;NDUFS7;TUBB3;UQCRQ;PENK;NDUFA2;APOE;DRD2;TUBB4A	DisGeNET
Tardive Dyskinesia	4/51	0.00301268	0.166425	7.26462	42.1706	ADORA2A;PPP1R1B;APOE;DRD2	DisGeNET
Drug-induced tardive dyskinesia	4/51	0.00301268	0.166425	7.26462	42.1706	ADORA2A;PPP1R1B;APOE;DRD2	DisGeNET
Adenocarcinoma, Oxyphilic	6/122	0.00321633	0.167406	4.43811	25.4726	DDR1;ID3;APOE;CKB;EEF2;MET	DisGeNET
Hippocampal sclerosis	4/52	0.00323409	0.167406	7.11291	40.7855	GRIN2A;LCN2;APOE;SOD1	DisGeNET
Carotid Artery Plaque	3/26	0.00341051	0.167406	11.0993	63.0541	LPL;APOE;TAC1	DisGeNET
Adenocarcinoma, Tubular	6/125	0.0036259	0.167406	4.32557	24.3082	DDR1;ID3;APOE;CKB;EEF2;MET	DisGeNET
Ureterocele	2/8	0.00367389	0.167406	28.2675	158.482	PEX6;PLEC	DisGeNET
Wernicke-Korsakoff Syndrome	2/8	0.00367389	0.167406	28.2675	158.482	APOE;TKT	DisGeNET
Malignant neoplasm of border of tongue	2/8	0.00367389	0.167406	28.2675	158.482	FOS;JUNB	DisGeNET
Malignant neoplasm of dorsal surface of tongue	2/8	0.00367389	0.167406	28.2675	158.482	FOS;JUNB	DisGeNET
Malignant neoplasm of ventral surface of tongue	2/8	0.00367389	0.167406	28.2675	158.482	FOS;JUNB	DisGeNET
Malignant tumor of base of tongue	2/8	0.00367389	0.167406	28.2675	158.482	FOS;JUNB	DisGeNET
Malignant tumor of junctional zone of tongue	2/8	0.00367389	0.167406	28.2675	158.482	FOS;JUNB	DisGeNET
malignant tumor of lingual tonsil	2/8	0.00367389	0.167406	28.2675	158.482	FOS;JUNB	DisGeNET
Drug Withdrawal Symptoms	4/54	0.00370968	0.167406	6.82771	38.2134	GRIN2A;ADORA2A;FOS;DRD2	DisGeNET
Pelizaeus-Merzbacher Disease	3/27	0.00380387	0.169272	10.6363	59.2627	PRDX5;MAG;MBP	DisGeNET
Parkinsonian Disorders	8/214	0.00389674	0.17103	3.34614	18.5631	UCHL1;DCTN1;PENK;PPP1R1B;APOE;DRD2;TAC1;SOD1	DisGeNET
Common Migraine	4/55	0.00396434	0.171645	6.69349	37.0178	LRP1;DRD2;TAC1;SOD1	DisGeNET
Gilles de la Tourette syndrome	4/48	0.00241091	0.18494	7.76112	46.7821	DRD2;DLGAP3;ADRA2A;CSNK1G2	Jensen DISEASES
Myofascial pain syndrome	2/7	0.00277688	0.18494	33.9227	199.684	NDUFB8;TAC1	Jensen DISEASES
Carcinoma in situ of prostate	2/9	0.00468709	0.188257	24.2281	129.934	LRP1;PIN1	DisGeNET
Sleep Apnea, Obstructive	6/132	0.004731	0.188257	4.0838	21.8631	DCTN3;LPL;APOE;TAC1;MET;AHDC1	DisGeNET
Lewy Body Disease	6/133	0.00490705	0.188257	4.05144	21.5418	CST3;MAG;UCHL1;PENK;APOE;SOD1	DisGeNET
AMYOTROPHIC LATERAL SCLEROSIS 1	5/94	0.0050483	0.188257	4.80606	25.4178	CST3;DCTN1;PENK;FOS;SOD1	DisGeNET
Abnormal mitochondria in muscle tissue	3/30	0.00514518	0.188257	9.45307	49.8148	NDUFB10;NDUFS7;NDUFV1	DisGeNET
Middle Cerebral Artery Occlusion	6/135	0.00527352	0.188257	3.98822	20.9184	COX8A;SPHK2;APOE;FOS;JUNB;SOD1	DisGeNET
Motor Neuron Disease	6/135	0.00527352	0.188257	3.98822	20.9184	COX8A;UCHL1;DCTN1;PIN1;APOE;SOD1	DisGeNET
Membranous glomerulonephritis	5/95	0.00527887	0.188257	4.75242	24.9219	UCHL1;PDLIM2;GAA;APOE;PRRC2A	DisGeNET
Amyotrophic Lateral Sclerosis, Sporadic	6/136	0.0054641	0.188257	3.95734	20.616	CST3;DCTN1;PENK;APOE;FOS;SOD1	DisGeNET
Dementia	12/436	0.00564252	0.188257	2.45465	12.7088	CST3;SREBF1;PRDX5;UCHL1;JPH3;LRP1;DCTN1;PENK;PIN1;APOE;TAC1;SOD1	DisGeNET
Gilles de la Tourette syndrome	5/97	0.00576219	0.188257	4.64863	23.9704	ADORA2A;DRD2;DLGAP3;MET;ADRA2A	DisGeNET
Severe dementia	2/10	0.00581366	0.188257	21.1985	109.12	JPH3;APOE	DisGeNET
Ventricular Dysfunction	2/10	0.00581366	0.188257	21.1985	109.12	ADORA2A;GAA	DisGeNET
cortex bone disorders	2/10	0.00581366	0.188257	21.1985	109.12	APOE;DRD2	DisGeNET
Perihilar Cholangiocarcinoma	2/10	0.00581366	0.188257	21.1985	109.12	FOS;JUNB	DisGeNET
Progressive gait ataxia	2/10	0.00581366	0.188257	21.1985	109.12	EEF2;SPTBN2	DisGeNET
Acidosis, Lactic	7/183	0.00600348	0.188257	3.41714	17.4801	BCKDHA;NDUFS7;NDUFB11;UQCRQ;NDUFA2;NDUFV1;MET	DisGeNET
Frontotemporal Lobar Degeneration	5/98	0.00601519	0.188257	4.59841	23.5138	CST3;DCTN1;PIN1;APOE;SOD1	DisGeNET
Schizophrenia	35/1923	0.00607687	0.188257	1.65703	8.45627	DDR1;LRP1;LPL;AGAP3;SELENOH;GRIN2A;LRRTM1;MBP;APOE;CKB;DLGAP3;DRD2;TAC1;CRYM;NDUFV1;GIT1;SH3GL2;SPTBN2;SREBF1;ADRA2A;PRRC2A;SOD1;ARHGAP33;TPPP3;MAG;PITPNM1;ADORA2A;NDUFS7;VGF;PPP1R1B;NOS1AP;LCN2;TKT;MET;PLEC	DisGeNET
Lung Neoplasms	24/1177	0.00613471	0.188257	1.83608	9.35263	DDR1;MAP2K2;GPX4;LRP1;BAD;COX17;LPL;FOS;EEF2;ATOX1;PRRC2A;SOD1;NISCH;BAG6;UCHL1;DOK4;TUBB3;FASN;ID3;APOE;JUNB;MET;SLC12A9;AVPI1	DisGeNET
Lipid Metabolism Disorders	3/32	0.0061785	0.188257	8.80024	44.764	LPL;APOE;RXRG	DisGeNET
Leigh Disease	5/99	0.0062759	0.188257	4.54926	23.0695	COX8A;NDUFS7;NDUFA2;TKT;NDUFV1	DisGeNET
Hypoglycemia	8/232	0.00628652	0.188257	3.07442	15.5853	BCKDHA;SREBF1;TUBB3;UQCRQ;LPL;APOE;CKB;NDUFV1	DisGeNET
Respiratory Failure	7/185	0.00636084	0.188257	3.3784	17.0866	NDUFS7;DCTN1;GAA;PEX6;NDUFA2;NDUFV1;SOD1	DisGeNET
Dystrophia myotonica 2	4/63	0.00643792	0.188257	5.78355	29.1812	GAA;FASN;LPL;EEF2	DisGeNET
Neuro-degenerative disease	4/63	0.00643792	0.188257	5.78355	29.1812	UCHL1;DCTN1;APOE;SOD1	DisGeNET
Delusions	3/33	0.00673818	0.188257	8.50647	42.532	JPH3;APOE;DRD2	DisGeNET
Gerstmann-Straussler-Scheinker Disease	3/33	0.00673818	0.188257	8.50647	42.532	GAA;APOE;ADRA2A	DisGeNET
Glioblastoma	35/1937	0.00678536	0.188257	1.64355	8.20621	DDR1;IGSF8;NDUFA13;LRP1;STMN3;CST3;TUBB3;MBP;ROMO1;APOE;DLGAP3;DRD2;TAC1;JUNB;CAMK2G;SH3GL2;SLC12A9;COX8A;SREBF1;PLK5;LRRN2;SPHK2;BAD;NME3;FOS;DOHH;EEF2;SOD1;NCOR2;LCN2;PIN1;PPIB;MET;CDH19;PLEC	DisGeNET
Neuromuscular Diseases	5/101	0.00682096	0.188257	4.45403	22.2156	JPH3;GAA;APOE;PLEC;SOD1	DisGeNET
Brain Stem Ischemia, Transient	2/11	0.00705082	0.188257	18.8422	93.3556	BAD;SOD1	DisGeNET
Transient Ischemic Attack, Anterior Circulation	2/11	0.00705082	0.188257	18.8422	93.3556	BAD;SOD1	DisGeNET
Transient Ischemic Attack, Vertebrobasilar Circulation	2/11	0.00705082	0.188257	18.8422	93.3556	BAD;SOD1	DisGeNET
11 pairs of ribs	2/11	0.00705082	0.188257	18.8422	93.3556	GPX4;SNRPB	DisGeNET
Antibody measurement (procedure)	2/11	0.00705082	0.188257	18.8422	93.3556	BAG6;PRRC2A	DisGeNET
Apraxia of Phonation	2/11	0.00705082	0.188257	18.8422	93.3556	GRIN2A;APOE	DisGeNET
Carotid Circulation Transient Ischemic Attack	2/11	0.00705082	0.188257	18.8422	93.3556	BAD;SOD1	DisGeNET
Crescendo Transient Ischemic Attacks	2/11	0.00705082	0.188257	18.8422	93.3556	BAD;SOD1	DisGeNET
Eyelid Xanthoma	2/11	0.00705082	0.188257	18.8422	93.3556	JPH3;APOE	DisGeNET
Granular cell tumor	2/11	0.00705082	0.188257	18.8422	93.3556	UCHL1;FASN	DisGeNET
Malignant neoplasm of body of pancreas	2/11	0.00705082	0.188257	18.8422	93.3556	APOE;MET	DisGeNET
malignant neoplasm of head of pancreas	2/11	0.00705082	0.188257	18.8422	93.3556	APOE;MET	DisGeNET
Malignant neoplasm of other specified sites of pancreas	2/11	0.00705082	0.188257	18.8422	93.3556	APOE;MET	DisGeNET
Malignant neoplasm of tail of pancreas	2/11	0.00705082	0.188257	18.8422	93.3556	APOE;MET	DisGeNET
MITOCHONDRIAL COMPLEX III DEFICIENCY (disorder)	2/11	0.00705082	0.188257	18.8422	93.3556	UQCRQ;UQCC2	DisGeNET
Posterior Circulation Transient Ischemic Attack	2/11	0.00705082	0.188257	18.8422	93.3556	BAD;SOD1	DisGeNET
Disease Exacerbation	6/144	0.00717473	0.189979	3.72641	18.398	RPS26;NDUFA2;APOE;NDUFV1;RPS21;SNRPB	DisGeNET
Anxiety Disorders	11/396	0.00739916	0.189979	2.47194	12.1283	ADORA2A;PENK;MAP3K10;MBP;APOE;FOS;DLGAP3;DRD2;TAC1;ADRA2A;SOD1	DisGeNET
GRN-related frontotemporal dementia	4/66	0.00758028	0.189979	5.50286	26.8661	CST3;PIN1;APOE;SOD1	DisGeNET
Heart failure	18/815	0.00788154	0.189979	1.97413	9.56118	DDR1;ZBTB17;HDAC5;ALAS2;GPX4;BAD;SGTA;NME3;FOS;SOD1;NISCH;CST3;ADORA2A;FASN;NOS1AP;LCN2;PIN1;APOE	DisGeNET
Right Middle Cerebral Artery Infarction	3/35	0.00794545	0.189979	7.974	38.5555	SPHK2;FOS;JUNB	DisGeNET
Embolic Infarction, Middle Cerebral Artery	3/35	0.00794545	0.189979	7.974	38.5555	SPHK2;FOS;JUNB	DisGeNET
Gait, Drop Foot	3/35	0.00794545	0.189979	7.974	38.5555	INF2;COX6A1;SOD1	DisGeNET
Thrombotic Infarction, Middle Cerebral Artery	3/35	0.00794545	0.189979	7.974	38.5555	SPHK2;FOS;JUNB	DisGeNET
HTLV-I Infections	3/35	0.00794545	0.189979	7.974	38.5555	PDLIM2;LRP1;BAD	DisGeNET
Left Middle Cerebral Artery Infarction	3/35	0.00794545	0.189979	7.974	38.5555	SPHK2;FOS;JUNB	DisGeNET
Middle Cerebral Artery Embolus	3/35	0.00794545	0.189979	7.974	38.5555	SPHK2;FOS;JUNB	DisGeNET
Middle Cerebral Artery Syndrome	3/35	0.00794545	0.189979	7.974	38.5555	SPHK2;FOS;JUNB	DisGeNET
Middle Cerebral Artery Thrombosis	3/35	0.00794545	0.189979	7.974	38.5555	SPHK2;FOS;JUNB	DisGeNET
Pre-renal acute kidney injury	3/35	0.00794545	0.189979	7.974	38.5555	GPX4;LCN2;SOD1	DisGeNET
Segmental dystonia	2/12	0.00839583	0.194728	16.9571	81.0552	TUBB3;TUBB4A	DisGeNET
Abnormal involuntary movement	2/12	0.00839583	0.194728	16.9571	81.0552	ADORA2A;DRD2	DisGeNET
Abnormality of the nasolacrimal system	2/12	0.00839583	0.194728	16.9571	81.0552	NDUFB11;PEX6	DisGeNET
Progressive multiple sclerosis	2/12	0.00839583	0.194728	16.9571	81.0552	DDT;APOE	DisGeNET
Congestive heart failure	19/884	0.00844796	0.194728	1.92197	9.17514	DDR1;ZBTB17;HDAC5;ALAS2;GPX4;BAD;SGTA;NME3;FOS;SOD1;CST3;ADORA2A;FASN;NOS1AP;FSCN1;LCN2;PIN1;APOE;GIT1	DisGeNET
Reperfusion Injury	5/110	0.00968675	0.213153	4.07039	18.8744	ADORA2A;LCN2;ID3;FOS;SOD1	DisGeNET
Attention deficit hyperactivity disorder	11/412	0.0097858	0.213153	2.37135	10.9718	GRIN2A;ADORA2A;LAMB2;PPP1R1B;APOE;DRD2;TAC1;BAIAP2;RXRG;GIT1;ADRA2A	DisGeNET
Cerebral Amyloid Angiopathy, Hereditary	2/13	0.00984601	0.213153	15.4147	71.2268	CST3;APOE	DisGeNET
Transformed migraine	2/13	0.00984601	0.213153	15.4147	71.2268	TAC1;SOD1	DisGeNET
Ubiquinone dehydrogenase deficiency	2/13	0.00984601	0.213153	15.4147	71.2268	UQCC2;UQCRQ	DisGeNET
Laryngeal dystonia	2/13	0.00984601	0.213153	15.4147	71.2268	TUBB3;TUBB4A	DisGeNET
Low density lipoprotein increased	2/13	0.00984601	0.213153	15.4147	71.2268	LPL;APOE	DisGeNET
obsolete Combined hyperlipidemia	2/13	0.00984601	0.213153	15.4147	71.2268	LPL;APOE	DisGeNET
Opioid abuse	2/13	0.00984601	0.213153	15.4147	71.2268	PENK;PPP1R1B	DisGeNET
Leukodystrophy	7/204	0.010592	0.227763	3.0496	13.8686	PRDX5;MAG;NDUFS7;PEX6;NDUFA2;TUBB4A;NDUFV1	DisGeNET
Hypertriglyceridemia	6/157	0.0107337	0.227982	3.40334	15.432	CST3;SREBF1;TSC22D4;JPH3;LPL;APOE	DisGeNET
Withdrawal Symptoms	4/73	0.0107445	0.227982	4.94284	22.4077	GRIN2A;ADORA2A;FOS;DRD2	DisGeNET
Kidney Failure, Acute	9/310	0.0113365	0.231554	2.57513	11.5359	COX8A;CST3;HDAC5;GPX4;BAD;LCN2;APOE;MET;SOD1	DisGeNET
Semantic Dementia	2/14	0.0113987	0.231554	14.1295	63.2188	APOE;SOD1	DisGeNET
ALZHEIMER DISEASE 2	2/14	0.0113987	0.231554	14.1295	63.2188	LRP1;APOE	DisGeNET
Micronodular cirrhosis	2/14	0.0113987	0.231554	14.1295	63.2188	TALDO1;MET	DisGeNET
Paraneoplastic Cerebellar Degeneration	2/14	0.0113987	0.231554	14.1295	63.2188	COX8A;CST3	DisGeNET
Anxiety States, Neurotic	3/40	0.011491	0.231554	6.89469	30.793	ADORA2A;FOS;DRD2	DisGeNET
Abnormal coordination	3/40	0.011491	0.231554	6.89469	30.793	CST3;EEF2;SPTBN2	DisGeNET
Motor symptoms	3/40	0.011491	0.231554	6.89469	30.793	PENK;APOE;SOD1	DisGeNET
Pancreatic intraepithelial neoplasia	5/115	0.0115919	0.232127	3.88439	17.3145	FASN;PENK;FSCN1;LCN2;SLC12A9	DisGeNET
Opiate dependence	2/10	0.00581366	0.234194	21.1985	109.12	GRIN2A;PENK	Jensen DISEASES
Krabbe disease	2/10	0.00581366	0.234194	21.1985	109.12	GAA;MBP	Jensen DISEASES
Campylobacteriosis	2/11	0.00705082	0.234194	18.8422	93.3556	CLPP;RPS21	Jensen DISEASES
Neurodegenerative disease	9/293	0.008027	0.234194	2.73166	13.1801	UCHL1;MAG;INF2;DCTN1;APOE;COX6A1;EEF2;SPTBN2;SOD1	Jensen DISEASES
Motion sickness	2/12	0.00839583	0.234194	16.9571	81.0552	FOS;TAC1	Jensen DISEASES
Leigh disease	3/37	0.00927213	0.234194	7.50418	35.1252	NDUFS7;NDUFA2;NDUFV1	Jensen DISEASES
Epicondylitis	2/13	0.00984601	0.234194	15.4147	71.2268	NDUFB8;TAC1	Jensen DISEASES
Wilson disease	2/13	0.00984601	0.234194	15.4147	71.2268	COX17;ATOX1	Jensen DISEASES
Cystitis	2/13	0.00984601	0.234194	15.4147	71.2268	FOS;TAC1	Jensen DISEASES
Hyperhomocysteinemia	5/117	0.0124205	0.247176	3.81464	16.7402	COX8A;PRDX5;DDAH2;APOE;SLC12A9	DisGeNET
Adenocarcinoma of lung (disorder)	23/1187	0.0128433	0.251819	1.73371	7.55017	DDR1;COX8A;NDUFA13;GPX4;LRP1;RCC2;TNK2;RPL13A;FOS;FAM227B;SOD1;FBL;ADORA2A;DDT;FASN;LCN2;EIF4H;ID3;PIN1;APOE;JUNB;MET;SLC12A9	DisGeNET
Executive dysfunction	2/15	0.0130514	0.251819	13.0419	56.5871	APOE;DRD2	DisGeNET
Hyperglycemia	12/488	0.0130781	0.251819	2.18062	9.45693	UCHL1;DDAH2;FASN;LPL;PIN1;APOE;FOS;TKT;DRD2;JUNB;SLC12A9;SOD1	DisGeNET
Memory Disorder, Semantic	3/42	0.0131254	0.251819	6.54045	28.3411	SPHK2;DRD2;GIT1	DisGeNET
Memory Disorder, Spatial	3/42	0.0131254	0.251819	6.54045	28.3411	SPHK2;DRD2;GIT1	DisGeNET
Age-Related Memory Disorders	3/42	0.0131254	0.251819	6.54045	28.3411	SPHK2;DRD2;GIT1	DisGeNET
Diabetes Mellitus, Non-Insulin-Dependent	30/1672	0.0132068	0.251873	1.61519	6.98898	RNASEK;LRP1;COX4I1;CELF4;LPL;ABCB9;CST3;UCHL1;JPH3;ROMO1;APOE;DRD2;RXRG;CAMK2G;SLC12A9;KCNJ4;SREBF1;BAD;GAA;ADRA2A;PRRC2A;SOD1;NISCH;NCOR2;VGF;DDAH2;FASN;NOS1AP;LCN2;MCM6	DisGeNET
Classical Hodgkin's Lymphoma	6/166	0.0138336	0.259658	3.21043	13.7427	FSCN1;LPL;FOS;JUNB;MET;SLC12A9	DisGeNET
Transient Cerebral Ischemia	3/43	0.0139898	0.259658	6.37662	27.2245	BAD;APOE;SOD1	DisGeNET
Depressive Syndrome	3/43	0.0139898	0.259658	6.37662	27.2245	ADORA2A;APOE;SOD1	DisGeNET
Hyperlipoproteinemias	3/43	0.0139898	0.259658	6.37662	27.2245	SREBF1;LPL;APOE	DisGeNET
Progressive Neoplastic Disease	6/167	0.0142128	0.259658	3.19032	13.5704	DDT;PIN1;APOE;TAC1;TUBB4A;SOD1	DisGeNET
Depressive disorder	16/741	0.0145059	0.259658	1.91869	8.12219	HDAC5;DCTN1;COX4I1;ADRA2A;SOD1;GRIN2A;JPH3;ADORA2A;VGF;PENK;PPP1R1B;NOS1AP;APOE;DRD2;TAC1;MET	DisGeNET
Dyskinesia, Medication-Induced	2/16	0.0148015	0.259658	12.1097	51.0187	PENK;DRD2	DisGeNET
Skin Manifestations	2/16	0.0148015	0.259658	12.1097	51.0187	COX8A;PLEC	DisGeNET
Nephrosis, congenital	2/16	0.0148015	0.259658	12.1097	51.0187	INF2;LAMB2	DisGeNET
Primary hyperoxaluria, type I	2/16	0.0148015	0.259658	12.1097	51.0187	GRHPR;PRDX5	DisGeNET
Waxy flexibility	2/16	0.0148015	0.259658	12.1097	51.0187	PPP1R1B;DRD2	DisGeNET
Duration of sleep	2/16	0.0148015	0.259658	12.1097	51.0187	PIN1;DRD2	DisGeNET
Lingual-Facial-Buccal Dyskinesia	2/16	0.0148015	0.259658	12.1097	51.0187	PPP1R1B;DRD2	DisGeNET
Morphine Dependence	2/16	0.0148015	0.259658	12.1097	51.0187	GRIN2A;DRD2	DisGeNET
Behavior Disorders	3/44	0.0148858	0.259658	6.22077	26.173	CELF4;DRD2;ADRA2A	DisGeNET
Movement Disorders	6/169	0.0149928	0.259658	3.15086	13.2342	JPH3;ADORA2A;PEX6;PPP1R1B;DRD2;SOD1	DisGeNET
Progressive cGVHD	6/169	0.0149928	0.259658	3.15086	13.2342	DDT;PIN1;APOE;TAC1;TUBB4A;SOD1	DisGeNET
Nystagmus	12/500	0.015553	0.264734	2.12567	8.85023	PRDX5;UCHL1;MAG;MAP2K2;NDUFS7;TUBB3;NDUFB11;LAMB2;PEX6;NDUFA2;EEF2;NDUFV1	DisGeNET
Prostatic Neoplasms	28/1554	0.0156728	0.264734	1.61672	6.7188	DDR1;IGSF8;NDUFA13;LPL;PTPRK;CST3;TUBB3;PENK;MBP;APOE;TAC1;SLC12A9;SREBF1;BAD;LAMB2;TNK2;SGTA;FOS;SOD1;NCOR2;GRHPR;DPM3;CDC37;FASN;LCN2;ID3;PIN1;MET	DisGeNET
Sleeplessness	3/45	0.0158135	0.264734	6.07235	25.1814	ADORA2A;DCTN1;DRD2	DisGeNET
Enteritis	3/45	0.0158135	0.264734	6.07235	25.1814	FOS;TAC1;JUNB	DisGeNET
Lipoatrophy	3/45	0.0158135	0.264734	6.07235	25.1814	SREBF1;APOE;FOS	DisGeNET
Nicotinamide adenine dinucleotide coenzyme Q reductase deficiency	3/45	0.0158135	0.264734	6.07235	25.1814	NDUFB6;NDUFS7;NDUFV1	DisGeNET
Hyperlipidemia, Familial Combined	4/82	0.0159187	0.264734	4.37052	18.0951	JPH3;LPL;APOE;RXRG	DisGeNET
Mental disorders	9/329	0.0161438	0.264734	2.41987	9.98492	GRIN2A;MAG;VGF;NOS1AP;GPR52;APOE;DRD2;BAIAP2;TUBB4A	DisGeNET
Adverse reaction to drug	4/83	0.0165747	0.264734	4.31498	17.6909	CST3;ADORA2A;LCN2;SOD1	DisGeNET
Drug toxicity	4/83	0.0165747	0.264734	4.31498	17.6909	CST3;ADORA2A;LCN2;SOD1	DisGeNET
Memory Loss	5/126	0.0166464	0.264734	3.52928	14.4544	SPHK2;APOE;DRD2;GIT1;SOD1	DisGeNET
Schistosomiasis mansoni	2/17	0.0166464	0.264734	11.3019	46.2874	APOE;SOD1	DisGeNET
Motor Neuron Disease, Lower	2/17	0.0166464	0.264734	11.3019	46.2874	DCTN1;SOD1	DisGeNET
Alagille Syndrome	2/17	0.0166464	0.264734	11.3019	46.2874	APOE;DRD2	DisGeNET
Central nervous system lesion	2/17	0.0166464	0.264734	11.3019	46.2874	LCN2;MBP	DisGeNET
Portal vein thrombosis	2/17	0.0166464	0.264734	11.3019	46.2874	COX8A;MET	DisGeNET
Sleep Apnea, Central	3/46	0.0167731	0.264734	5.93083	24.2451	ALAS2;APOE;SLC12A9	DisGeNET
Ketosis	3/46	0.0167731	0.264734	5.93083	24.2451	BCKDHA;SREBF1;LPL	DisGeNET
Hemochromatosis	4/84	0.0172475	0.270887	4.26082	17.2993	COX8A;ALAS2;APOE;SOD1	DisGeNET
Arteriosclerosis	21/1087	0.0176123	0.271748	1.72134	6.95276	DDR1;SREBF1;HDAC5;GPX4;LRP1;NDUFA2;NME2;LPL;FOS;SOD1;NISCH;CST3;JPH3;DDAH2;NOS1AP;LCN2;ID3;MAP3K10;PIN1;APOE;TAC1	DisGeNET
Coronary Arteriosclerosis	16/760	0.0179707	0.271748	1.86783	7.50681	COX8A;SREBF1;LRP1;LPL;FOS;EEF2;ADRA2A;SOD1;CST3;JPH3;ADORA2A;DDAH2;NOS1AP;LCN2;APOE;FCGR2B	DisGeNET
Seizures, Focal	5/129	0.0182434	0.271748	3.44337	13.7871	GRIN2A;ADORA2A;APOE;FOS;DRD2	DisGeNET
Mood Disorders	9/336	0.018246	0.271748	2.36722	9.47789	GRIN2A;ADORA2A;VGF;DCTN1;PPP1R1B;APOE;DRD2;TAC1;ADRA2A	DisGeNET
Dyskinesia, Drug-Induced	2/18	0.0185839	0.271748	10.595	42.2258	PENK;DRD2	DisGeNET
Leprosy, Paucibacillary	2/18	0.0185839	0.271748	10.595	42.2258	LRP1;SCAF1	DisGeNET
Stenosis	2/18	0.0185839	0.271748	10.595	42.2258	CST3;APOE	DisGeNET
Aneurysmal disease	2/18	0.0185839	0.271748	10.595	42.2258	FOS;JUNB	DisGeNET
Compression of spinal cord	2/18	0.0185839	0.271748	10.595	42.2258	APOE;SOD1	DisGeNET
Hyperlipoproteinemia Type I	2/18	0.0185839	0.271748	10.595	42.2258	UCHL1;LPL	DisGeNET
Hyperlipoproteinemia Type III	2/18	0.0185839	0.271748	10.595	42.2258	LPL;APOE	DisGeNET
Primary Cutaneous Anaplastic Large Cell Lymphoma	2/18	0.0185839	0.271748	10.595	42.2258	JUNB;SLC12A9	DisGeNET
Diabetic Neuropathies	4/86	0.0186436	0.271748	4.15648	16.5522	SREBF1;BAD;MBP;APOE	DisGeNET
Headache	4/86	0.0186436	0.271748	4.15648	16.5522	ADORA2A;APOE;DRD2;SOD1	DisGeNET
Diabetes Mellitus	27/1507	0.0187213	0.271748	1.60374	6.37983	RNASEK;LPL;CST3;UCHL1;JPH3;APOE;TAC1;RXRG;SLC12A9;SREBF1;GAA;NME2;TALDO1;FOS;ADRA2A;SOD1;ADORA2A;NDUFS7;VGF;DDAH2;FASN;PEX6;NOS1AP;LCN2;ID3;PIN1;TKT	DisGeNET
Tauopathies	5/130	0.0187974	0.271748	3.41565	13.5739	CST3;ADORA2A;PIN1;APOE;SOD1	DisGeNET
Aortic Valve Stenosis	5/130	0.0187974	0.271748	3.41565	13.5739	DDR1;SREBF1;APOE;FOS;JUNB	DisGeNET
Mental Depression	13/575	0.018829	0.271748	2.00089	7.94825	HDAC5;COX4I1;ADRA2A;SOD1;GRIN2A;VGF;PENK;PPP1R1B;NOS1AP;APOE;DRD2;TAC1;MET	DisGeNET
Kidney Diseases	14/639	0.0192405	0.276442	1.93998	7.66436	COX8A;SREBF1;GPX4;LAMB2;TALDO1;LPL;SOD1;CST3;UCHL1;INF2;DDAH2;LCN2;APOE;FCGR2B	DisGeNET
Chronic active hepatitis	4/87	0.0193671	0.276687	4.10619	16.1956	COX17;MET;ATOX1;SOD1	DisGeNET
Neuropathy	8/284	0.0194303	0.276687	2.48854	9.80715	ABCA2;ZBTB17;MAG;INF2;PIN1;APOE;PLEC;SOD1	DisGeNET
Amyloidosis	17/833	0.0196315	0.277326	1.81088	7.11787	DDR1;ABCA2;LRP1;GAA;LPL;SOD1;CST3;PRDX5;UCHL1;MAG;PCSK1N;PPP1R1B;PIN1;MBP;APOE;PPIB;TAC1	DisGeNET
Unipolar Depression	12/517	0.0196482	0.277326	2.0523	8.06507	HDAC5;ADORA2A;VGF;LRP1;PPP1R1B;APOE;FOS;DRD2;NDUFV1;MET;ADRA2A;SOD1	DisGeNET
Central nervous system demyelination	3/49	0.0198439	0.277641	5.5432	21.7285	MAG;NDUFS7;NDUFA2	DisGeNET
Intracranial Hemorrhages	3/49	0.0198439	0.277641	5.5432	21.7285	COX8A;CST3;APOE	DisGeNET
Noninfiltrating Intraductal Carcinoma	8/287	0.0205434	0.278279	2.4614	9.56308	COX8A;NCOR2;SREBF1;FBL;DOK4;FASN;MET;SLC12A9	DisGeNET
Encephalopathy, Subacute Necrotizing, Infantile	2/19	0.0206113	0.278279	9.97122	38.7074	NDUFS7;NDUFA2	DisGeNET
Encephalopathy, Subacute Necrotizing, Juvenile	2/19	0.0206113	0.278279	9.97122	38.7074	NDUFS7;NDUFA2	DisGeNET
Agoraphobia	2/19	0.0206113	0.278279	9.97122	38.7074	ADORA2A;DRD2	DisGeNET
Anti-Glomerular Basement Membrane Disease	2/19	0.0206113	0.278279	9.97122	38.7074	DDR1;FCGR2B	DisGeNET
CADASIL Syndrome	2/19	0.0206113	0.278279	9.97122	38.7074	APOE;SOD1	DisGeNET
Classical phenylketonuria	2/19	0.0206113	0.278279	9.97122	38.7074	MBP;SOD1	DisGeNET
Lipidemias	2/19	0.0206113	0.278279	9.97122	38.7074	LPL;APOE	DisGeNET
Hyperactive behavior	15/709	0.0207677	0.278279	1.87362	7.25909	UQCC2;LPL;FOS;ADRA2A;SOD1;UCHL1;ADORA2A;FASN;AP2S1;APOE;DRD2;TAC1;FCGR2B;MET;GIT1	DisGeNET
Aortic Aneurysm, Abdominal	8/288	0.0209243	0.278279	2.45249	9.48338	CST3;LRP1;GAA;LCN2;APOE;FOS;FCGR2B;JUNB	DisGeNET
Clostridium; difficile (disorder)	3/50	0.0209317	0.278279	5.42498	20.9756	FOS;TAC1;JUNB	DisGeNET
Giant Cell Tumors	3/50	0.0209317	0.278279	5.42498	20.9756	UCHL1;FOS;MET	DisGeNET
Dystonia Disorders	5/135	0.0217336	0.282614	3.28344	12.572	TUBB3;PENK;APOE;DRD2;TUBB4A	DisGeNET
Anxiety	11/464	0.0217605	0.282614	2.0935	8.01322	JPH3;ADORA2A;DCTN1;PENK;MAP3K10;MBP;APOE;DLGAP3;DRD2;TAC1;SOD1	DisGeNET
Cockayne Syndrome, Type I	3/51	0.0220516	0.282614	5.31169	20.2607	ALAS2;APOE;SLC12A9	DisGeNET
Pain, Crushing	3/51	0.0220516	0.282614	5.31169	20.2607	PENK;DRD2;TAC1	DisGeNET
Pain, Migratory	3/51	0.0220516	0.282614	5.31169	20.2607	PENK;DRD2;TAC1	DisGeNET
Pain, Splitting	3/51	0.0220516	0.282614	5.31169	20.2607	PENK;DRD2;TAC1	DisGeNET
Suffering, Physical	3/51	0.0220516	0.282614	5.31169	20.2607	PENK;DRD2;TAC1	DisGeNET
Ache	3/51	0.0220516	0.282614	5.31169	20.2607	PENK;DRD2;TAC1	DisGeNET
Radiating pain	3/51	0.0220516	0.282614	5.31169	20.2607	PENK;DRD2;TAC1	DisGeNET
Cognition Disorders	7/237	0.0222923	0.28456	2.60765	9.91822	LCN2;APOE;DRD2;BAIAP2;MET;ADRA2A;SOD1	DisGeNET
Cholesteryl Ester Transfer Protein Deficiency	2/20	0.0227265	0.286676	9.41679	35.6352	LPL;APOE	DisGeNET
Dyslipoproteinemias	2/20	0.0227265	0.286676	9.41679	35.6352	LPL;APOE	DisGeNET
Porencephalic cyst	2/20	0.0227265	0.286676	9.41679	35.6352	GPX4;SNRPB	DisGeNET
Drug usage	3/52	0.0232037	0.289314	5.20303	19.5813	APOE;DRD2;ADRA2A	DisGeNET
Idiopathic crescentic glomerulonephritis	3/52	0.0232037	0.289314	5.20303	19.5813	DDR1;FOS;JUNB	DisGeNET
Premature aging syndrome	4/92	0.023244	0.289314	3.8719	14.565	NCOR2;PIN1;APOE;SOD1	DisGeNET
Malaria	11/469	0.0233149	0.289314	2.07011	7.78086	ADORA2A;DDT;FSCN1;MBP;APOE;FOS;DOHH;TAC1;FCGR2B;PRRC2A;SOD1	DisGeNET
Vomiting	6/187	0.0233871	0.289314	2.83491	10.6467	BCKDHA;TUBB3;LPL;TAC1;NDUFV1;MET	DisGeNET
Muscular Dystrophies, Limb-Girdle	4/93	0.0240718	0.292656	3.8282	14.2666	DPM3;DCTN1;GAA;PLEC	DisGeNET
Edema	4/93	0.0240718	0.292656	3.8282	14.2666	LAMB2;APOE;TAC1;SOD1	DisGeNET
Muscle Spasticity	9/353	0.0241715	0.292656	2.24826	8.36934	NDUFS7;TUBB3;DCTN1;GAA;PEX6;NDUFA2;APOE;NDUFV1;SOD1	DisGeNET
Other specified types of schizophrenia, unspecified	3/53	0.024388	0.292656	5.09871	18.9349	LRRTM1;MBP;APOE	DisGeNET
Pain, Burning	3/53	0.024388	0.292656	5.09871	18.9349	PENK;DRD2;TAC1	DisGeNET
Anxiety neurosis (finding)	3/53	0.024388	0.292656	5.09871	18.9349	ADORA2A;FOS;DRD2	DisGeNET
Bradycardia	3/53	0.024388	0.292656	5.09871	18.9349	NISCH;DRD2;TAC1	DisGeNET
NEUROTICISM	3/53	0.024388	0.292656	5.09871	18.9349	PENK;APOE;DRD2	DisGeNET
Xanthoma	2/21	0.024927	0.293625	8.92071	32.9335	JPH3;APOE	DisGeNET
Diabetic peripheral neuropathy	2/21	0.024927	0.293625	8.92071	32.9335	SREBF1;NOS1AP	DisGeNET
LEIGH SYNDROME DUE TO MITOCHONDRIAL COMPLEX I DEFICIENCY	2/21	0.024927	0.293625	8.92071	32.9335	NDUFS7;NDUFV1	DisGeNET
Neonatal respiratory distress	2/21	0.024927	0.293625	8.92071	32.9335	PLEC;SNRPB	DisGeNET
Pathological accumulation of air in tissues	2/21	0.024927	0.293625	8.92071	32.9335	APOE;MET	DisGeNET
Cerebellar atrophy	6/190	0.0250403	0.29388	2.78826	10.2811	MAG;UCHL1;EEF2;NDUFV1;TUBB4A;SPTBN2	DisGeNET
Action Tremor	3/54	0.0256044	0.295003	4.99848	18.3194	JPH3;ADORA2A;SPTBN2	DisGeNET
Cerebral Aneurysm	3/54	0.0256044	0.295003	4.99848	18.3194	COX8A;GAA;APOE	DisGeNET
Thyroid Neoplasm	11/476	0.0256256	0.295003	2.03821	7.46834	CDH6;NDUFA13;LRP1;FSCN1;LCN2;ID3;PIN1;FOS;RXRG;MET;SLC12A9	DisGeNET
Diabetes	23/1268	0.0256392	0.295003	1.61385	5.91256	SREBF1;RNASEK;NME2;TALDO1;LPL;ADRA2A;SOD1;CST3;UCHL1;JPH3;ADORA2A;NDUFS7;VGF;FASN;NOS1AP;LCN2;ID3;PIN1;APOE;TKT;TAC1;RXRG;SLC12A9	DisGeNET
Renal cyst	4/95	0.0257805	0.295003	3.74368	13.6949	HDAC5;PEX6;B9D2;SNRPB	DisGeNET
Sciatic Neuropathy	4/95	0.0257805	0.295003	3.74368	13.6949	MAG;NOS1AP;APOE;SOD1	DisGeNET
Gastric ulcer	4/95	0.0257805	0.295003	3.74368	13.6949	VGF;BAD;MET;SOD1	DisGeNET
Hereditary Diffuse Gastric Cancer	8/300	0.0258939	0.295245	2.35025	8.58722	RPS26;PRDX5;NDUFA2;CKB;RPS21;NDUFV1;MET;SNRPB	DisGeNET
Vascular inflammations	5/142	0.0263223	0.298234	3.11457	11.3287	CST3;LCN2;PIN1;APOE;TAC1	DisGeNET
Hyperreflexia	8/301	0.0263421	0.298234	2.34211	8.51728	JPH3;NDUFS7;UQCRQ;PEX6;NDUFA2;NDUFV1;SPTBN2;SOD1	DisGeNET
Atherosclerosis	21/1134	0.0265536	0.299569	1.64451	5.96724	DDR1;SREBF1;HDAC5;GPX4;LRP1;NDUFA2;NME2;LPL;FOS;SOD1;NISCH;CST3;JPH3;DDAH2;NOS1AP;LCN2;ID3;MAP3K10;PIN1;APOE;TAC1	DisGeNET
Benign neoplasm of aortic body and other paraganglia	2/22	0.0272106	0.30167	8.47425	30.5425	EGLN2;MET	DisGeNET
Malignant Adrenal Medulla Neoplasm	2/22	0.0272106	0.30167	8.47425	30.5425	EGLN2;MET	DisGeNET
Malignant neoplasm of aortic body and other paraganglia	2/22	0.0272106	0.30167	8.47425	30.5425	EGLN2;MET	DisGeNET
Minimal Brain Dysfunction	2/22	0.0272106	0.30167	8.47425	30.5425	DRD2;GIT1	DisGeNET
Other specified manifestations of hyperkinetic syndrome	2/22	0.0272106	0.30167	8.47425	30.5425	HDAC5;GIT1	DisGeNET
Presenile dementia	9/362	0.0278115	0.307269	2.18993	7.84499	CST3;SREBF1;PRDX5;UCHL1;JPH3;LRP1;DCTN1;APOE;SOD1	DisGeNET
Nerve Degeneration	5/145	0.0284644	0.313402	3.04736	10.8459	KCNJ4;UCHL1;DCTN1;APOE;SOD1	DisGeNET
response to statin	2/23	0.029575	0.314681	8.0703	28.4141	LPL;APOE	DisGeNET
Tumor Necrosis Factor Receptor 1-Associated Periodic Syndrome	2/23	0.029575	0.314681	8.0703	28.4141	FSCN1;FOS	DisGeNET
Benign neoplasm of adrenal gland	2/23	0.029575	0.314681	8.0703	28.4141	EGLN2;MET	DisGeNET
Decreased Concentration	2/23	0.029575	0.314681	8.0703	28.4141	CST3;TAC1	DisGeNET
Hepatocellular necrosis	2/23	0.029575	0.314681	8.0703	28.4141	NDUFS7;NDUFA2	DisGeNET
Involuntary Movements	2/23	0.029575	0.314681	8.0703	28.4141	PPP1R1B;DRD2	DisGeNET
Lipids measurement	2/23	0.029575	0.314681	8.0703	28.4141	LPL;APOE	DisGeNET
Abnormal heart beat	4/100	0.0303649	0.314681	3.5478	12.3977	RPS26;GPX4;NDUFB11;PEX6	DisGeNET
ECG abnormality	4/100	0.0303649	0.314681	3.5478	12.3977	RPS26;GPX4;NDUFB11;PEX6	DisGeNET
Mood swings	4/100	0.0303649	0.314681	3.5478	12.3977	NDUFS7;DCTN1;NDUFA2;SOD1	DisGeNET
SCHIZOPHRENIA 1 (disorder)	3/58	0.0307902	0.314681	4.63401	16.129	LRRTM1;MBP;APOE	DisGeNET
Amnesia	3/58	0.0307902	0.314681	4.63401	16.129	APOE;TAC1;SOD1	DisGeNET
Heart valve disease	3/58	0.0307902	0.314681	4.63401	16.129	MAP2K2;LCN2;APOE	DisGeNET
Single Seizure	4/101	0.0313358	0.314681	3.51105	12.1587	ADORA2A;APOE;FOS;DRD2	DisGeNET
Seizures, Auditory	4/101	0.0313358	0.314681	3.51105	12.1587	ADORA2A;APOE;FOS;DRD2	DisGeNET
Seizures, Clonic	4/101	0.0313358	0.314681	3.51105	12.1587	ADORA2A;APOE;FOS;DRD2	DisGeNET
Seizures, Sensory	4/101	0.0313358	0.314681	3.51105	12.1587	ADORA2A;APOE;FOS;DRD2	DisGeNET
Seizures, Somatosensory	4/101	0.0313358	0.314681	3.51105	12.1587	ADORA2A;APOE;FOS;DRD2	DisGeNET
Vertiginous seizure	4/101	0.0313358	0.314681	3.51105	12.1587	ADORA2A;APOE;FOS;DRD2	DisGeNET
Atonic Absence Seizures	4/101	0.0313358	0.314681	3.51105	12.1587	ADORA2A;APOE;FOS;DRD2	DisGeNET
Generalized Absence Seizures	4/101	0.0313358	0.314681	3.51105	12.1587	ADORA2A;APOE;FOS;DRD2	DisGeNET
Gustatory seizure	4/101	0.0313358	0.314681	3.51105	12.1587	ADORA2A;APOE;FOS;DRD2	DisGeNET
Jacksonian Seizure	4/101	0.0313358	0.314681	3.51105	12.1587	ADORA2A;APOE;FOS;DRD2	DisGeNET
Non-epileptic convulsion	4/101	0.0313358	0.314681	3.51105	12.1587	ADORA2A;APOE;FOS;DRD2	DisGeNET
Nonepileptic Seizures	4/101	0.0313358	0.314681	3.51105	12.1587	ADORA2A;APOE;FOS;DRD2	DisGeNET
Olfactory seizure	4/101	0.0313358	0.314681	3.51105	12.1587	ADORA2A;APOE;FOS;DRD2	DisGeNET
Cardiac Arrest	6/201	0.031764	0.314681	2.62949	9.07023	NDUFB11;NOS1AP;APOE;SLC12A9;SPTBN2;SOD1	DisGeNET
Spastic Ataxia	2/24	0.0320181	0.314681	7.70308	26.5098	PRDX5;GAA	DisGeNET
Alcohol or Other Drugs use	2/24	0.0320181	0.314681	7.70308	26.5098	DRD2;ADRA2A	DisGeNET
Behavioral variant of frontotemporal dementia	2/24	0.0320181	0.314681	7.70308	26.5098	DCTN1;APOE	DisGeNET
Catalepsy	2/24	0.0320181	0.314681	7.70308	26.5098	PPP1R1B;DRD2	DisGeNET
Cognitive changes	2/24	0.0320181	0.314681	7.70308	26.5098	APOE;SOD1	DisGeNET
Etat Marbre	2/24	0.0320181	0.314681	7.70308	26.5098	ADORA2A;DRD2	DisGeNET
Hyperlipoproteinemia Type IIb	2/24	0.0320181	0.314681	7.70308	26.5098	LPL;APOE	DisGeNET
Norrie disease	2/24	0.0320181	0.314681	7.70308	26.5098	APOE;SOD1	DisGeNET
Sleep Apnea Syndromes	3/59	0.0321664	0.315172	4.55103	15.6411	APOE;AHDC1;SOD1	DisGeNET
Large intestine cancer	5/122	0.0146656	0.315375	3.65069	15.4141	GRIN2A;LRP1;RPL8;MET;PLEC	Jensen DISEASES
Multiple sclerosis	7/219	0.0151531	0.315375	2.83166	11.8634	DDR1;BAG6;RGS14;PTPRK;MET;SH3GL2;PRRC2A	Jensen DISEASES
Cardiac conduction abnormality	4/102	0.0323248	0.315758	3.47504	11.9261	RPS26;GPX4;NDUFB11;PEX6	DisGeNET
Toxic encephalopathy	5/126	0.0166464	0.316286	3.52928	14.4544	GRIN2A;MBP;APOE;FOS;SOD1	Jensen DISEASES
Cerebrovascular disease	7/225	0.0173196	0.316286	2.75288	11.1654	CST3;GRIN2A;MBP;APOE;FOS;TAC1;SNRPB	Jensen DISEASES
Menkes disease	2/18	0.0185839	0.316286	10.595	42.2258	COX17;ATOX1	Jensen DISEASES
Withdrawal disorder	2/20	0.0227265	0.316286	9.41679	35.6352	PENK;FOS	Jensen DISEASES
dentatorubral-pallidoluysian atrophy	2/20	0.0227265	0.316286	9.41679	35.6352	JPH3;BAIAP2	Jensen DISEASES
Spinal cord disease	2/21	0.024927	0.316286	8.92071	32.9335	MBP;SOD1	Jensen DISEASES
Nephrotic syndrome	2/21	0.024927	0.316286	8.92071	32.9335	INF2;LAMB2	Jensen DISEASES
Anxiety disorder	2/22	0.0272106	0.316286	8.47425	30.5425	DRD2;TAC1	Jensen DISEASES
Pain agnosia	4/101	0.0313358	0.316286	3.51105	12.1587	NDUFB8;PENK;FOS;TAC1	Jensen DISEASES
Maple syrup urine disease	1/3	0.034839	0.316286	42.2286	141.762	BCKDHA	Jensen DISEASES
Sudden infant death syndrome	2/27	0.0397978	0.316286	6.77768	21.8509	FOS;TAC1	Jensen DISEASES
Amyloidosis	2/27	0.0397978	0.316286	6.77768	21.8509	CST3;APOE	Jensen DISEASES
Hyperhomocysteinemia	2/27	0.0397978	0.316286	6.77768	21.8509	DDAH2;APOE	Jensen DISEASES
Age related macular degeneration	2/28	0.0425343	0.316286	6.51667	20.576	CST3;APOE	Jensen DISEASES
Nephrolithiasis	2/30	0.04821	0.316286	6.05058	18.3465	GRHPR;RGS14	Jensen DISEASES
Electrocardiogram abnormal	4/103	0.0333319	0.323623	3.43977	11.6995	RPS26;GPX4;NDUFB11;PEX6	DisGeNET
Epileptic Seizures	4/103	0.0333319	0.323623	3.43977	11.6995	ADORA2A;APOE;FOS;DRD2	DisGeNET
Factor V Leiden mutation	3/60	0.0335743	0.324991	4.47096	15.1744	COX8A;LPL;APOE	DisGeNET
Diabetic Nephropathy	12/561	0.0339428	0.326427	1.88351	6.37205	COX8A;CST3;MAP2K2;GPX4;DDAH2;LAMB2;LCN2;TALDO1;LPL;APOE;TKT;SOD1	DisGeNET
Tonic Seizures	4/104	0.0343572	0.326427	3.40519	11.4787	ADORA2A;APOE;FOS;DRD2	DisGeNET
Electrocardiographic changes	4/104	0.0343572	0.326427	3.40519	11.4787	RPS26;GPX4;NDUFB11;PEX6	DisGeNET
Kidney Failure, Chronic	10/437	0.0343824	0.326427	2.0128	6.78357	CST3;SREBF1;PRDX5;INF2;FASN;LCN2;LPL;APOE;MET;SOD1	DisGeNET
Dystonia, Primary	2/25	0.0345377	0.326427	7.36779	24.7978	APOE;TUBB4A	DisGeNET
Hepatic Form of Wilson Disease	2/25	0.0345377	0.326427	7.36779	24.7978	NDUFB7;APOE	DisGeNET
Onion bulb formation	2/25	0.0345377	0.326427	7.36779	24.7978	INF2;COX6A1	DisGeNET
Perianal Squamous Intraepithelial Neoplasia	2/25	0.0345377	0.326427	7.36779	24.7978	APOE;SLC12A9	DisGeNET
Aura	3/61	0.0350138	0.328024	4.39365	14.7276	GRIN2A;FOS;ADRA2A	DisGeNET
Awakening Epilepsy	3/61	0.0350138	0.328024	4.39365	14.7276	GRIN2A;FOS;ADRA2A	DisGeNET
Increased CSF lactate	3/61	0.0350138	0.328024	4.39365	14.7276	NDUFS7;NDUFA2;NDUFV1	DisGeNET
Heroin Dependence	3/62	0.0364848	0.34038	4.31897	14.2995	GRIN2A;PENK;DRD2	DisGeNET
Malignant Glioma	11/504	0.0365451	0.34038	1.91966	6.35256	UCHL1;LRRN2;BAD;FSCN1;PIN1;MBP;FOS;PPIB;MET;SLC12A9;SOD1	DisGeNET
Schizophreniform Disorders	2/26	0.0371316	0.342852	7.06044	23.2521	APOE;DRD2	DisGeNET
Abnormal pattern of respiration	2/26	0.0371316	0.342852	7.06044	23.2521	NDUFS7;NDUFA2	DisGeNET
Hyperprolactinemia	2/26	0.0371316	0.342852	7.06044	23.2521	LPL;DRD2	DisGeNET
Trisomy	6/209	0.0373302	0.343695	2.52483	8.30154	GRIN2A;TALDO1;LPL;JUNB;MET;SOD1	DisGeNET
Alcohol abuse	4/107	0.0375424	0.344658	3.30551	10.8496	PENK;APOE;DRD2;TKT	DisGeNET
Epilepsy, Cryptogenic	3/63	0.0379872	0.34577	4.24677	13.8891	GRIN2A;FOS;ADRA2A	DisGeNET
Inclusion Body Myopathy, Sporadic	3/63	0.0379872	0.34577	4.24677	13.8891	CST3;APOE;SOD1	DisGeNET
Kidney Calculi	3/63	0.0379872	0.34577	4.24677	13.8891	GRHPR;RGS14;SOD1	DisGeNET
Stomach Neoplasms	16/835	0.0381371	0.346151	1.69009	5.52079	BAD;ARPC1B;TNK2;NDUFA2;FOS;RPS26;PRDX5;PPP1R1B;ID3;APOE;CKB;TAC1;RPS21;NDUFV1;MET;SNRPB	DisGeNET
Memory impairment	7/267	0.0388486	0.351613	2.30322	7.48105	ADORA2A;SPHK2;LCN2;APOE;DRD2;GIT1;SOD1	DisGeNET
Cortical Dysplasia	3/64	0.0395207	0.355687	4.17694	13.4954	GRIN2A;TUBB3;TUBB4A	DisGeNET
Extrapyramidal sign	3/64	0.0395207	0.355687	4.17694	13.4954	UQCRQ;APOE;DRD2	DisGeNET
Convulsive Seizures	4/109	0.039757	0.35618	3.24222	10.4561	ADORA2A;APOE;FOS;DRD2	DisGeNET
Corneal Diseases	2/27	0.0397978	0.35618	6.77768	21.8509	APOE;TAC1	DisGeNET
Alzheimer's Disease	32/1982	0.0401458	0.35758	1.44014	4.6304	DDR1;NDUFB8;LRP1;LPL;CST3;GRIN2A;UCHL1;PCSK1N;PENK;MBP;APOE;CKB;DRD2;QRFPR;JUNB;SH3GL2;VAT1L;COX8A;ABCA2;MAP2K2;NME2;FOS;EEF2;ADRA2A;SOD1;ADORA2A;FASN;PPP1R1B;LCN2;PIN1;PPIB;MET	DisGeNET
Myopia	7/269	0.0401775	0.35758	2.28541	7.34632	UCHL1;MAP2K2;ADORA2A;LRP1;NDUFB11;LAMB2;APOE	DisGeNET
HEMOCHROMATOSIS, TYPE 1	3/65	0.0410853	0.364647	4.10936	13.1175	COX8A;APOE;SOD1	DisGeNET
AMYOTROPHIC LATERAL SCLEROSIS 1, AUTOSOMAL RECESSIVE	2/28	0.0425343	0.370326	6.51667	20.576	DCTN1;SOD1	DisGeNET
Sideroblastic anemia	2/28	0.0425343	0.370326	6.51667	20.576	ALAS2;NDUFB11	DisGeNET
Parkinsonism, Experimental	2/28	0.0425343	0.370326	6.51667	20.576	DCTN1;DRD2	DisGeNET
Autosomal Dominant Juvenile Parkinson Disease	2/28	0.0425343	0.370326	6.51667	20.576	DCTN1;DRD2	DisGeNET
Familial Juvenile Parkinsonism	2/28	0.0425343	0.370326	6.51667	20.576	DCTN1;DRD2	DisGeNET
Hyperemia	2/28	0.0425343	0.370326	6.51667	20.576	APOE;TAC1	DisGeNET
Ramsay Hunt Paralysis Syndrome	2/28	0.0425343	0.370326	6.51667	20.576	DCTN1;DRD2	DisGeNET
Dyslipidemias	6/216	0.0426833	0.370616	2.4398	7.695	ENHO;SREBF1;LRP1;LPL;APOE;RXRG	DisGeNET
Cholera	4/112	0.043216	0.373219	3.15168	9.90113	COX8A;MBP;APOE;SOD1	DisGeNET
Neonatal Hypotonia	4/112	0.043216	0.373219	3.15168	9.90113	MAG;UQCC2;PEX6;AHDC1	DisGeNET
androgen independent prostate cancer	5/163	0.0436153	0.375654	2.69772	8.45018	DDR1;TNK2;FSCN1;PIN1;SLC12A9	DisGeNET
Hepatitis C	15/783	0.0439148	0.377219	1.68652	5.27124	DDR1;COX8A;IGSF8;SREBF1;DCTN3;LPL;SCAF1;SOD1;FASN;APOE;CKB;PPIB;MET;CSNK1G2;SLC12A9	DisGeNET
Obesity, Morbid	4/113	0.0444056	0.380415	3.1226	9.725	NCOR2;LCN2;LPL;DRD2	DisGeNET
Rectal Carcinoma	7/276	0.0450611	0.384302	2.22514	6.89733	RCC2;LCN2;STMN3;APOE;TKT;MET;SLC12A9	DisGeNET
Scrub Typhus	2/29	0.045339	0.384302	6.275	19.4122	FOS;JUNB	DisGeNET
Chronic Kidney Insufficiency	2/29	0.045339	0.384302	6.275	19.4122	CST3;LCN2	DisGeNET
Phenylketonurias	2/29	0.045339	0.384302	6.275	19.4122	MBP;SOD1	DisGeNET
Nonorganic psychosis	6/220	0.0459483	0.388439	2.39371	7.37319	GRIN2A;PPP1R1B;GPR52;APOE;FOS;DRD2	DisGeNET
Adenocarcinoma	28/1712	0.0465579	0.392557	1.45234	4.45441	DDR1;LRP1;STMN3;LPL;UCHL1;TUBB3;DDT;PENK;APOE;CKB;SLC12A9;COX8A;MAP2K2;MAP1S;BAD;TNK2;NME2;FOS;EEF2;SOD1;FASN;PPP1R1B;FSCN1;LCN2;ID3;FAU;MET;PLEC	DisGeNET
Epileptic drop attack	4/115	0.0468393	0.393893	3.06603	9.38521	ADORA2A;APOE;FOS;DRD2	DisGeNET
Ataxias, Hereditary	5/167	0.0475297	0.396064	2.63057	8.01376	ALAS2;UCHL1;GAA;TUBB4A;SPTBN2	DisGeNET
Infratentorial atrophy	5/167	0.0475297	0.396064	2.63057	8.01376	MAG;UCHL1;EEF2;NDUFV1;SPTBN2	DisGeNET
Hepatolenticular Degeneration	3/69	0.0476508	0.396064	3.85952	11.7478	NDUFB7;APOE;ATOX1	DisGeNET
Progressive supranuclear palsy	3/69	0.0476508	0.396064	3.85952	11.7478	DCTN1;PIN1;APOE	DisGeNET
Ataxia, Spinocerebellar	4/116	0.0480835	0.396064	3.0385	9.22128	ALAS2;JPH3;SPTBN2;SOD1	DisGeNET
Complex partial seizures	4/116	0.0480835	0.396064	3.0385	9.22128	ADORA2A;APOE;FOS;DRD2	DisGeNET
Serum cholesterol raised	2/30	0.04821	0.396064	6.05058	18.3465	LPL;APOE	DisGeNET
Narcolepsy-Cataplexy Syndrome	2/30	0.04821	0.396064	6.05058	18.3465	PENK;TAC1	DisGeNET
Polydipsia	2/30	0.04821	0.396064	6.05058	18.3465	DRD2;ADRA2A	DisGeNET
Amyotrophic Lateral Sclerosis	13/660	0.0486952	0.399027	1.73033	5.22935	COX8A;DCTN1;SOD1;CST3;GRIN2A;JPH3;VGF;LCN2;PIN1;APOE;TAC1;CRYM;MET	DisGeNET
Dysarthria	7/282	0.049539	0.404068	2.17592	6.53862	GRIN2A;JPH3;NDUFS7;DCTN1;NDUFA2;EEF2;SPTBN2	DisGeNET
Fibrosis	5/169	0.0495627	0.404068	2.59822	7.80641	GPX4;ADORA2A;TALDO1;TAC1;ADRA2A	DisGeNET

## Sheet: H. Enrichment GEO disease data
EnrichR results for GEO disease data (UP and DOWN) for genes common between cortex and striaum
red highlight: adj P-value < 0.05; blue highlight: P-value <0.05
Term	Overlap	P-value	Adjusted P-value	Odds Ratio	Combined Score	Genes	Category
Hypertension C0020538 rat GSE2739 sample 209	37/418	6.58482e-22	5.26127e-19	9.50725	463.689	DDR1;DCTN1;COX4I1;RPLP0;UQCR11;RPL8;COX6A1;CST3;UCHL1;DDT;EIF4H;RPLP2;MBP;APOE;CKB;GIT1;SPTBN2;COX8A;NDUFA8;GAA;TNK2;NME2;NDUFC2;RPL13A;EEF2;SOD1;RPS26;MAG;INF2;NDUFS7;CDC37;ID3;FAU;RPS21;CSNK1G2;TOMM6;SNRPB	DiseasePerturbations_GEO DOWN
Generalized seizures C0234533 mouse GSE6614 sample 169	30/279	2.67755e-20	7.66475e-18	11.4699	516.911	RNASEK;NDUFB7;RPLP1;ABHD8;CELF4;COX6A1;KRTCAP2;PCSK1N;APOE;CKB;NDUFV1;GIT1;GRCC10;ATP6V0B;NDUFA7;EGLN2;TNK2;MID1IP1;NDUFA2;EEF2;NISCH;RPS26;DPM3;SNRK;UQCRQ;FSCN1;SPNS1;TMEM119;ID3;CSNK1G2	DiseasePerturbations_GEO DOWN
Muscular Dystrophy C0026850 mouse GSE2507 sample 232	32/329	2.87788e-20	7.66475e-18	10.3328	464.922	NDUFA13;NDUFB8;RNASEK;NDUFB7;NDUFB10;NDUFB6;NDUFB11;RPLP1;RPLP0;TIMM13;UQCR11;RPL8;CST3;ZNHIT1;ATP5E;NDUFV1;GRCC10;NDUFA8;NDUFA7;GAA;NDUFA2;SGTA;EDF1;JOSD2;EEF2;ATOX1;SOD1;RPS26;1810037I17RIK;UQCRQ;FKBP8;PKIG	DiseasePerturbations_GEO DOWN
Sjogren's syndrome DOID-12894 human GSE23117 sample 888	34/393	7.25547e-20	1.44928e-17	9.14375	402.965	NDUFA13;RNASEK;NDUFB11;RPLP1;COX4I1;RPLP0;RPL8;COX6A1;CST3;FBL;PRDX5;TUBB3;ATP5E;EIF4H;POLR2E;RPLP2;ROMO1;COX8A;ATP6V0B;GPX4;RPS5;SNHG8;NDUFC2;RPL13A;EDF1;EEF2;SOD1;UQCRQ;PPP1R1B;FAU;PPIB;RPS21;PFDN5;TOMM6	DiseasePerturbations_GEO DOWN
Cerebral Infarction C0007785 mouse GSE63 sample 262	34/408	2.3603e-19	3.77176e-17	8.77024	376.158	IGSF8;NDUFB8;RNASEK;CHPF;NDUFB6;DCTN1;COX17;ABHD8;BMYC;PRDX5;UCHL1;PCSK1N;TUBB3;PENK;PALM;NDUFV1;GIT1;SPTBN2;GRCC10;ABCA2;ZBTB17;NDUFA7;GAA;TNK2;EEF2;TUBB4A;NISCH;1700037H04RIK;PITPNM1;UQCRQ;ADPRH;FKBP8;FSCN1;C1QC	DiseasePerturbations_GEO DOWN
Gamma-hydroxybutyric acidaemia C0268631 mouse GSE2866 sample 205	30/308	4.54559e-19	6.05321e-17	10.2581	433.251	IGSF8;HDAC5;NDUFA13;CHPF;DCTN1;TIMM13;ABHD8;BMYC;TPGS1;PRDX5;UCHL1;PCSK1N;TUBB3;MBP;NDUFV1;SPTBN2;TSC22D4;ATP6V0B;GAA;TALDO1;NME3;MT2;GPR37L1;EEF2;TUBB4A;SNRK;UQCRQ;ADPRH;FKBP8;FSCN1	DiseasePerturbations_GEO DOWN
Huntington's disease DOID-12858 mouse GSE3248 sample 728	30/312	6.55524e-19	7.48234e-17	10.1105	423.316	NDUFB8;RNASEK;NDUFB6;DCTN1;RPLP1;COX17;DCTN3;TIMM13;STMN3;UQCR11;RPL8;COX6A1;CST3;PCSK1N;JPH3;TUBB3;ATP5E;PENK;CKB;NDUFA8;NDUFA7;GPX4;UQCC2;RPL13A;SOD1;UQCRQ;ADPRH;FKBP8;PKIG;CSNK1G2	DiseasePerturbations_GEO DOWN
Alzheimer's disease DOID-10652 human GSE4757 sample 592	26/231	3.25704e-18	2.65449e-15	11.8698	477.944	NDUFA13;NDUFB8;RNASEK;RPLP1;RPLP0;DCTN3;UQCR11;RPL8;COX6A1;CST3;TUBB3;ATP5E;RPLP2;APOE;COX8A;GPX4;RPS5;RPL13A;EDF1;EEF2;SOD1;RPS26;UQCRQ;ABHD17A;FAU;RPS21	DiseasePerturbations_GEO UP
Neurofibromatosis DOID-8712 mouse GSE1482 sample 667	25/231	3.8456e-17	3.70931e-15	11.3032	427.226	NDUFB6;DCTN1;RPLP0;TIMM13;RPL8;COX6A1;UCHL1;PCSK1N;ATP5E;APOE;GRCC10;TSC22D4;ATP6V0B;NDUFA7;GAA;RPS5;TUBB4A;1810037I17RIK;MAG;UQCRQ;CLPP;FKBP8;FSCN1;C1QC;SNRPB	DiseasePerturbations_GEO DOWN
Senescence C0001792 mouse GSE5078 sample 331	28/307	4.1782e-17	3.70931e-15	9.44727	356.295	IGSF8;HDAC5;RNASEK;CHPF;RGS14;DCTN1;DCTN3;TIMM13;STMN3;UQCR11;AGAP3;SLC4A3;PCSK1N;TUBB3;CRYM;NDUFV1;GIT1;SPTBN2;ATP6V0B;NDUFA7;GAA;GPR37L1;NISCH;1810037I17RIK;UQCRQ;PEX6;FSCN1;ID3	DiseasePerturbations_GEO DOWN
Neurofibromatosis DOID-8712 mouse GSE1482 sample 669	28/295	1.46508e-17	5.97021e-15	9.87794	382.889	CHPF;DCTN1;RPLP1;RPL8;PRDX5;UCHL1;PCSK1N;ATP5E;PALM;MBP;APOE;CKB;GIT1;GRCC10;ATP6V1G1;ATP6V0B;GAA;RPS5;TNK2;MID1IP1;EEF2;TUBB4A;NISCH;RPS26;NCOR2;TMEM119;CSNK1G2;SNRPB	DiseasePerturbations_GEO UP
acute myocardial infarction DOID-9408 mouse GSE775 sample 1001	27/292	1.11348e-16	8.89674e-15	9.55189	350.878	NDUFA13;NDUFB8;NDUFB7;NDUFB10;NDUFB11;RPLP0;TIMM13;UQCR11;SLC4A3;PRDX5;ATP5E;NDUFV1;BCKDHA;NDUFA8;NDUFA7;GPX4;UQCC2;LAMB2;NDUFA2;SGTA;EEF2;SOD1;SNRK;UQCRQ;CLPP;PKIG;CSNK1G2	DiseasePerturbations_GEO DOWN
Spinal Cord Injury C0037929 rat GSE16710 sample 427	26/274	2.25362e-16	6.12234e-14	9.79013	352.727	COX4I1;CCDC124;RPLP0;COX6A1;PCSK1N;TUBB3;AP2S1;MBP;APOE;CKB;BCKDHA;ATP6V1G1;GPX4;GPR37L1;FOS;EEF2;PRRC2A;NCOR2;TPPP3;MAG;PITPNM1;ABHD17A;FKBP8;PIN1;FAU;CSNK1G2	DiseasePerturbations_GEO UP
Dehydration C0011175 rat GSE3131 sample 60	29/375	9.10844e-16	6.61604e-14	7.90099	273.628	NDUFB8;NDUFB10;COX4I1;CCDC124;UQCR11;SLC4A3;COX6A1;BAG6;UCHL1;ATP5E;EIF4H;RPLP2;MBP;TAC1;NDUFA8;GPX4;RPS5;NME2;TALDO1;RPL13A;SOD1;RPS26;MAG;NDUFS7;CDC37;FASN;ID3;PIN1;FAU	DiseasePerturbations_GEO DOWN
Hypoxia C0242184 human GSE4630 sample 250	28/349	1.15634e-15	7.6993e-14	8.19348	281.802	NDUFB8;RAB5C;ARPC1B;RPLP1;RPLP0;LPL;UQCR11;RPL8;TUBB3;AP2S1;POLR2E;RPLP2;APOE;COX8A;ATP6V0B;RPS5;NME2;RPL13A;EEF2;TUBB4A;NDUFS7;UQCRQ;BOLA2;FSCN1;FAU;TKT;PPIB;SNRPB	DiseasePerturbations_GEO DOWN
Epilepsy DOID-1826 rat GSE2880 sample 804	29/397	4.05428e-15	2.45337e-13	7.42023	245.899	RNASEK;NDUFB10;LRP1;DCTN1;RPLP0;UQCR11;RPL8;PRDX5;PCSK1N;TUBB3;ATP5E;PENK;EIF4H;APOE;CKB;COX8A;ABCA2;NDUFA7;TALDO1;EEF2;TUBB4A;TPPP3;MAG;NDUFS7;UQCRQ;CDC37;FASN;FAU;PPIB	DiseasePerturbations_GEO DOWN
Hypertension C0020538 mouse GSE1674 sample 400	25/282	4.29877e-15	2.45337e-13	9.0365	298.932	NDUFB8;NDUFB7;NDUFB6;NDUFB11;TIMM13;UQCR11;COX6A1;PRDX5;TUBB3;CKB;NDUFV1;GRCC10;SREBF1;NDUFA8;ATP6V0B;NDUFA7;NDUFA2;TALDO1;ATOX1;1700037H04RIK;UQCRQ;FASN;FSCN1;TKT;SNRPB	DiseasePerturbations_GEO DOWN
Huntington's disease DOID-12858 mouse GSE5786 sample 721	23/231	4.62792e-15	2.46514e-13	10.2007	336.692	NDUFA8;NDUFA13;NDUFB8;NDUFB10;NDUFB6;NDUFB11;COX4I1;MID1IP1;SNHG8;NME2;NDUFC2;UQCR11;COX6A1;CST3;UCHL1;MAG;ATP5E;CROCC;CAR11;MBP;APOE;TKT;SSBP4	DiseasePerturbations_GEO DOWN
Huntington's disease DOID-12858 mouse GSE3248 sample 722	25/288	7.0058e-15	3.49852e-13	8.82763	287.71	HDAC5;NDUFB6;COX17;DCTN3;TIMM13;STMN3;UQCR11;PRDX5;TUBB3;ZMIZ2;PENK;CKB;NDUFV1;SPTBN2;ABCA2;EGLN2;NME3;EDF1;FOS;BAIAP2;TUBB4A;SNRK;PITPNM1;UQCRQ;TMEM119	DiseasePerturbations_GEO DOWN
neurofibromatosis DOID-8712 mouse GSE1482 sample 666	25/282	4.29877e-15	7.007e-13	9.0365	298.932	DDR1;IGSF8;NDUFA13;RNASEK;CHPF;LRP1;RGS14;TIMM13;COX6A1;CST3;JPH3;PALM;MBP;GIT1;SPTBN2;TSC22D4;NDUFA7;MT2;GPR37L1;TUBB4A;NISCH;NCOR2;MAG;UQCRQ;FSCN1	DiseasePerturbations_GEO UP
Generalized seizures C0234533 rat GSE1156 sample 342	25/282	4.29877e-15	7.007e-13	9.0365	298.932	NDUFB8;NDUFB10;RGS14;UQCR11;RPL8;SLC4A3;COX6A1;CST3;ATP5E;EIF4H;RPLP2;APOE;CKB;NDUFA8;GPX4;GAA;RPS5;NME2;RPL13A;SOD1;RPS26;NDUFS7;VGF;PPIB;RPS21	DiseasePerturbations_GEO UP
Huntington's disease DOID-12858 mouse GSE3248 sample 722	26/312	5.21771e-15	7.08739e-13	8.47281	278.643	RAB5C;NDUFB7;NDUFB11;RPLP1;RPLP0;CELF4;RPL8;SLC4A3;COX6A1;CST3;UCHL1;APOE;EIF2S3Y;GRCC10;SREBF1;ATP6V1G1;GAA;RPS5;NDUFA2;MT2;SOD1;NISCH;RPS26;FSCN1;TKT;C1QC	DiseasePerturbations_GEO UP
Kidney disorder associated with type 2 diabetes mellitus C1720457 mouse GSE2557 sample 8	26/318	8.22163e-15	9.57232e-13	8.29616	269.061	IGSF8;NDUFA13;RNASEK;NDUFB7;TIMM13;UQCR11;CST3;ZNHIT1;DDT;ATP5E;AP2S1;ROMO1;COX8A;D8ERTD738E;GPX4;TALDO1;MT2;ATOX1;GRHPR;1810037I17RIK;DDAH2;FASN;ID3;TKT;TOMM6;SNRPB	DiseasePerturbations_GEO UP
Rett Syndrome C0035372 human GSE6955 sample 390	28/381	1.07174e-14	1.09183e-12	7.43846	239.272	NDUFB8;RPLP1;COX4I1;DCTN3;UQCR11;PTPRK;RPL8;CST3;UCHL1;TUBB3;PALM;EIF4H;RPLP2;APOE;NDUFV1;COX8A;TSC22D4;GPX4;RPS5;RPL13A;EEF2;NISCH;FKBP8;FSCN1;PIN1;FAU;PKIG;RPS21	DiseasePerturbations_GEO UP
Primary pulmonary hypoplasia C0456891 mouse GSE1363 sample 20	24/270	1.4735e-14	1.33433e-12	9.02508	287.436	SREBF1;HDAC5;ATP6V0B;ALAS2;NDUFA7;RNASEK;LRP1;LAMB2;RPLP1;GAA;RPS5;RPLP0;RPL13A;MT2;RPL8;EEF2;ATOX1;SOD1;KRTCAP2;FASN;APOE;PPIB;NDUFV1;CSNK1G2	DiseasePerturbations_GEO UP
Spinal Cord Injury C0037929 rat GSE2599 sample 426	26/351	8.45756e-14	3.97505e-12	7.44115	223.987	NDUFB8;NDUFB10;NDUFB6;DCTN1;COX4I1;CCDC124;UQCR11;COX6A1;UCHL1;DDT;ATP5E;PENK;EIF4H;MBP;CKB;COX8A;NDUFA8;GPX4;TNK2;NDUFC2;SOD1;MAG;NDUFS7;FASN;PIN1;TOMM6	DiseasePerturbations_GEO DOWN
Urothelial carcinoma in situ C0334267 human GSE3167 sample 229	21/220	1.73515e-13	7.70214e-12	9.64838	283.494	COX8A;ATP6V1G1;NDUFA13;NDUFB8;EGLN2;GPX4;RPLP1;RPS5;COX4I1;RPLP0;RPL13A;RPL8;COX6A1;EEF2;CST3;UQCRQ;ABHD17A;LCN2;FAU;PFDN5;GIT1	DiseasePerturbations_GEO DOWN
Type 1 diabetes mellitus C0011854 mouse GSE4616 sample 363	25/343	3.75583e-13	1.57942e-11	7.28025	208.29	NDUFB8;RNASEK;NDUFB7;NDUFB10;NDUFB6;TIMM13;UQCR11;SLC4A3;COX6A1;PRDX5;ZNHIT1;ATP5E;BCKDHA;TSC22D4;NDUFA8;ATP6V1G1;GAA;MID1IP1;EDF1;JOSD2;ATOX1;NISCH;UQCRQ;FSCN1;CSNK1G2	DiseasePerturbations_GEO DOWN
Malignant Melanoma C0025202 human GSE4587 sample 326	22/258	4.52799e-13	1.80893e-11	8.54695	242.933	COX8A;ATP6V0B;NDUFA13;RNASEK;GPX4;RPLP1;RPS5;COX4I1;RPLP0;TALDO1;RPL13A;FOS;RPL8;EEF2;ATOX1;RPS26;FBL;TUBB3;RPLP2;FAU;AVPI1;SNRPB	DiseasePerturbations_GEO DOWN
Hypertrophy C0020564 rat GSE739 sample 57	24/308	2.68712e-13	2.19e-11	7.80228	225.838	COX8A;BCKDHA;NDUFB8;NDUFB10;GPX4;NDUFB11;UQCC2;RPS5;COX4I1;NME2;NDUFC2;RPL13A;EDF1;RPL8;SLC4A3;COX6A1;EEF2;RPS26;CST3;PENK;RPLP2;APOE;FAU;RPS21	DiseasePerturbations_GEO UP
Dehydration C0011175 rat GSE4130 sample 23	21/230	4.16008e-13	3.01343e-11	9.18204	261.762	GRCC10;NDUFB11;RPS5;COX4I1;NME2;RPL13A;RPL8;SOD1;RPS26;CST3;PCSK1N;UQCRQ;ATP5E;PENK;LCN2;ROMO1;FAU;CRYM;RPS21;PFDN5;TOMM6	DiseasePerturbations_GEO UP
Bipolar Disorder C0005586 human GSE5389 sample 302	20/205	4.43696e-13	3.01343e-11	9.84538	280.038	ARPP21;GPX4;NDUFB11;RPS5;COX4I1;RPLP0;RPL13A;RPL8;COX6A1;EEF2;NISCH;CST3;UCHL1;PCSK1N;TUBB3;AP2S1;APOE;CKB;FAU;PFDN5	DiseasePerturbations_GEO UP
ALS (Amyotrophic Lateral Sclerosis) C0002736 mouse GSE4390 sample 389	21/232	4.92866e-13	3.08989e-11	9.09408	257.713	DDR1;ABCA2;TSC22D4;ATP6V1G1;LRP1;RPLP1;RPS5;RPLP0;TIMM13;MT2;GPR37L1;TUBB4A;SOD1;RPS26;PCSK1N;PENK;FKBP8;FSCN1;APOE;GIT1;C1QC	DiseasePerturbations_GEO UP
acute myocardial infarction DOID-9408 mouse GSE775 sample 1004	23/299	1.13163e-12	4.30558e-11	7.66077	210.728	BCKDHA;GRCC10;NDUFA8;ATP6V1G1;NDUFA13;NDUFB8;NDUFA7;NDUFB7;NDUFB10;NDUFB6;NDUFB11;UQCC2;COX17;NDUFA2;LPL;UQCR11;SLC4A3;PRDX5;UQCRQ;ATP5E;ROMO1;PKIG;NDUFV1	DiseasePerturbations_GEO DOWN
Huntington's disease DOID-12858 mouse GSE3248 sample 727	25/354	7.5998e-13	4.42417e-11	7.03286	196.255	HDAC5;RNASEK;NDUFB7;LRP1;DCTN1;RPLP1;RPL8;SLC4A3;FBL;UCHL1;PCSK1N;TUBB3;APOE;EIF2S3Y;GRCC10;ATP6V0B;GAA;SGTA;MT2;GPR37L1;FOS;EEF2;NISCH;ADPRH;CSNK1G2	DiseasePerturbations_GEO UP
actinic keratosis DOID-8866 human GSE2503 sample 628	27/430	1.41234e-12	5.12936e-11	6.23657	170.17	NDUFA13;NDUFB11;RPLP1;COX4I1;RPLP0;DCTN3;LPL;UQCR11;RPL8;COX6A1;FBL;ATP5E;COX8A;ATP6V0B;GPX4;RPS5;TALDO1;NDUFC2;RPL13A;EEF2;RPS26;UQCRQ;FASN;FAU;RPS21;PFDN5;TOMM6	DiseasePerturbations_GEO DOWN
Neurofibromatosis DOID-8712 mouse GSE1482 sample 665	24/335	1.65039e-12	5.7333e-11	7.11504	193.031	GRCC10;IGSF8;ATP6V1G1;ATP6V0B;GPX4;LRP1;RGS14;DCTN1;GAA;DCTN3;CELF4;STMN3;MT2;EDF1;1810037I17RIK;PCSK1N;ZMIZ2;PALM;FKBP8;TMEM119;MBP;ROMO1;APOE;NDUFV1	DiseasePerturbations_GEO DOWN
Neurological pain disorder C0423704 rat GSE2636 sample 129	24/338	1.9973e-12	6.64935e-11	7.04597	189.813	COX8A;NDUFB8;NDUFB10;GPX4;NDUFB6;DCTN1;GAA;TNK2;CCDC124;NDUFC2;UQCR11;EDF1;COX6A1;SOD1;CST3;NDUFS7;CDC37;ATP5E;EIF4H;MBP;APOE;CKB;TAC1;RPS21	DiseasePerturbations_GEO DOWN
Escherichia coli infection of the central nervous system C1320188 mouse GSE3253 sample 341	20/225	2.53471e-12	8.10092e-11	8.87578	236.992	COX8A;NDUFA13;NDUFB11;RPLP1;MID1IP1;NDUFA2;SNHG8;RPL13A;FOS;COX6A1;RPS26;SNRK;VGF;PENK;FKBP8;ID3;MBP;APOE;FAU;RPS21	DiseasePerturbations_GEO DOWN
Spinal Muscular Atrophy, Infantile C0043116 mouse GSE3075 sample 126	27/432	1.57463e-12	8.55551e-11	6.20513	168.637	NDUFB11;RPLP1;RPLP0;STMN3;UQCR11;RPL8;COX6A1;CST3;PCSK1N;TUBB3;PENK;RPLP2;APOE;NDUFV1;TSC22D4;NDUFA8;RPS5;NME2;NDUFC2;RPL13A;RPS26;FASN;FKBP8;FSCN1;TKT;PPIB;TOMM6	DiseasePerturbations_GEO UP
nemaline myopathy DOID-3191 mouse GSE3384 sample 974	28/472	2.08205e-12	1.06054e-10	5.88619	158.325	HDAC5;NDUFB8;RNASEK;NDUFB7;NDUFB11;RPLP0;TIMM13;RPL8;ROMO1;APOE;NDUFV1;TSC22D4;EGLN2;UQCC2;GAA;RPS5;NDUFA2;SGTA;MT2;EDF1;EEF2;SOD1;NISCH;NCOR2;CDC37;FASN;PKIG;PLEC	DiseasePerturbations_GEO UP
neurofibromatosis DOID-8712 mouse GSE1482 sample 666	23/318	4.04734e-12	1.24378e-10	7.16038	187.838	ATP6V0B;NDUFB8;NDUFB6;RPLP1;RPS5;MID1IP1;RPLP0;DCTN3;BMYC;RPL8;SLC4A3;RPS26;UCHL1;PCSK1N;ATP5E;PENK;FKBP8;TMEM119;ID3;APOE;CKB;NDUFV1;CSNK1G2	DiseasePerturbations_GEO DOWN
Anterior Horn Cell Disease C0154681 human GSE1481 sample 208	21/254	2.86015e-12	1.37119e-10	8.22614	218.652	DDR1;METRN;RPLP0;NDUFC2;RPL13A;RPL8;COX6A1;RPS26;CST3;FBL;UCHL1;TPPP3;PCSK1N;TUBB3;PENK;EIF4H;RPLP2;CKB;FAU;TAC1;PFDN5	DiseasePerturbations_GEO UP
acute myocardial infarction DOID-9408 mouse GSE775 sample 1000	17/157	4.95264e-12	1.46561e-10	10.9314	284.555	TSC22D4;NDUFA8;ALAS2;NDUFB8;NDUFB7;NDUFB10;RPS5;RPLP1;RPLP0;SGTA;EDF1;SLC4A3;EEF2;UQCRQ;PPIB;NDUFV1;PLEC	DiseasePerturbations_GEO DOWN
nemaline myopathy DOID-3191 mouse GSE3384 sample 973	26/412	3.36971e-12	1.52573e-10	6.24556	164.984	NDUFB8;RNASEK;NDUFB7;NDUFB10;NDUFB11;RPLP0;UQCR11;RPL8;COX6A1;ATP5E;APOE;NDUFV1;ZBTB17;NDUFA8;NDUFA7;EGLN2;UQCC2;RPS5;NDUFA2;EEF2;ATOX1;SOD1;CDC37;TMEM119;PKIG;PLEC	DiseasePerturbations_GEO UP
Protozoan Infection C0033740 human GSE2077 sample 239	21/266	6.92856e-12	1.97711e-10	7.81842	200.897	COX8A;NDUFA7;LAMB2;RPLP1;GAA;RPS5;NME2;RPL13A;UQCR11;PTPRK;RPL8;EEF2;BAG6;NDUFS7;DDAH2;FASN;ID3;CKB;FAU;TKT;PFDN5	DiseasePerturbations_GEO DOWN
Nemaline Myopathy C0206157 mouse GSE3384 sample 180	26/419	4.92751e-12	2.11364e-10	6.1321	159.656	RNASEK;NDUFB7;NDUFB10;NDUFB11;DCTN1;RPLP0;UQCR11;RPL8;CST3;ZNHIT1;NDUFV1;ATP6V0B;NDUFA7;EGLN2;UQCC2;RPS5;NDUFA2;SGTA;EEF2;NCOR2;CDC37;FSCN1;TMEM119;PKIG;CSNK1G2;PLEC	DiseasePerturbations_GEO UP
Actinic keratosis C0022602 human GSE2503 sample 350	26/429	8.36747e-12	2.30538e-10	5.97685	152.449	NDUFA13;RPLP1;COX4I1;RPLP0;DCTN3;LPL;UQCR11;RPL8;COX6A1;FBL;ATP5E;COX8A;ATP6V0B;GPX4;RPS5;TALDO1;NDUFC2;RPL13A;EEF2;RPS26;UQCRQ;FASN;FAU;RPS21;PFDN5;TOMM6	DiseasePerturbations_GEO DOWN
nemaline myopathy DOID-3191 mouse GSE3384 sample 970	25/390	6.41718e-12	2.615e-10	6.32746	163.072	NDUFB10;NDUFB6;DCTN1;RPLP0;COX17;TIMM13;LPL;UQCR11;COX6A1;CST3;PRDX5;ATP5E;ROMO1;NDUFV1;BCKDHA;ATP6V1G1;NDUFA7;EGLN2;NDUFA2;MT2;RPS26;NCOR2;UQCRQ;TMEM119;CSNK1G2	DiseasePerturbations_GEO UP
Bipolar Disorder 3312 human GSE12654 sample 461	21/266	6.92856e-12	2.68894e-10	7.81842	200.897	COX8A;KCNJ4;ATP6V0B;NDUFB8;RAB5C;RPS5;RPLP0;NME2;RPL13A;UQCR11;RPL8;EEF2;SOD1;UCHL1;NDUFS7;TUBB3;UQCRQ;RPLP2;MBP;APOE;FAU	DiseasePerturbations_GEO UP
acute myocardial infarction DOID-9408 mouse GSE775 sample 1005	26/434	1.0842e-11	4.01646e-10	5.90208	149.013	NDUFA13;LRP1;RPLP1;COX17;TIMM13;COX6A1;CST3;PRDX5;ATP5E;APOE;CKB;GIT1;ATP6V1G1;GPX4;RPS5;MID1IP1;NDUFA2;EEF2;SOD1;NISCH;RPS26;SNRK;TMEM119;PKIG;CSNK1G2;C1QC	DiseasePerturbations_GEO UP
Sjogren's syndrome DOID-12894 human GSE23117 sample 889	22/308	1.55191e-11	4.06659e-10	7.03467	175.086	COX8A;NDUFA13;RNASEK;RPLP0;SNHG8;NDUFC2;RPL13A;EDF1;RPL8;COX6A1;EEF2;SOD1;CST3;PRDX5;TUBB3;UQCRQ;PPP1R1B;LCN2;EIF4H;RPLP2;FAU;PPIB	DiseasePerturbations_GEO DOWN
MS (Multiple Sclerosis) C0026769 mouse GSE842 sample 381	23/340	1.58603e-11	4.06659e-10	6.65591	165.514	GRCC10;IGSF8;ABCA2;ZBTB17;HDAC5;NDUFB8;SPHK2;GAA;MID1IP1;GPR37L1;EEF2;TUBB4A;ATOX1;SOD1;UCHL1;MAG;PCSK1N;ZNHIT1;TUBB3;FSCN1;CKB;NDUFV1;SH3GL2	DiseasePerturbations_GEO DOWN
Parkinson's disease DOID-14330 human GSE19587 sample 741	26/442	1.62867e-11	4.06659e-10	5.78618	143.733	DDR1;NDUFA13;COX4I1;RPLP0;DCTN3;COX6A1;CST3;BAG6;UCHL1;TUBB3;PALM;EIF4H;COX8A;GPX4;RPS5;MID1IP1;TALDO1;RPL13A;EEF2;TUBB4A;NISCH;RPS26;ABHD17A;PPIB;PFDN5;TOMM6	DiseasePerturbations_GEO DOWN
Hypertrophy, Left Ventricular C0149721 mouse GSE2459 sample 382	22/311	1.87639e-11	4.54314e-10	6.96057	171.92	DDR1;GRCC10;NDUFA8;NDUFA13;NDUFB8;NDUFA7;NDUFB7;NDUFB10;NDUFB6;RPLP1;NDUFA2;LPL;UQCR11;RPL8;SLC4A3;1700037H04RIK;PRDX5;UQCRQ;ATP5E;FSCN1;PKIG;NDUFV1	DiseasePerturbations_GEO DOWN
Huntington's disease DOID-12858 human GSE3248 sample 724	22/312	1.998e-11	4.6953e-10	6.93621	170.883	IGSF8;NDUFA13;NDUFA7;EGLN2;LRP1;STMN3;MT2;EDF1;GPR37L1;TUBB4A;SNRK;ZNHIT1;JPH3;PITPNM1;ZMIZ2;FASN;PENK;FKBP8;TMEM119;CKB;NDUFV1;SPTBN2	DiseasePerturbations_GEO DOWN
Huntington's disease DOID-12858 mouse GSE3248 sample 726	24/372	1.51864e-11	5.38127e-10	6.34646	158.094	SREBF1;ATP6V1G1;NDUFA7;RNASEK;DCTN1;RPLP1;RPS5;RPLP0;SGTA;CELF4;MT2;RPL8;SLC4A3;COX6A1;EEF2;SOD1;NISCH;RPS26;CST3;UCHL1;PCSK1N;ROMO1;APOE;C1QC	DiseasePerturbations_GEO UP
amyotrophic lateral sclerosis DOID-332 mouse GSE10953 sample 679	14/109	3.87193e-11	8.82944e-10	13.1165	314.463	NDUFA13;NDUFB8;NDUFB7;NDUFB6;STMN3;RPL13A;EDF1;UQCR11;COX6A1;MAG;PITPNM1;NDUFS7;NDUFV1;TOMM6	DiseasePerturbations_GEO DOWN
Nicotine addiction C0028043 human GSE11208 sample 325	27/497	3.97822e-11	8.82944e-10	5.32902	127.617	SF3B5;NDUFA13;NDUFB8;RNASEK;COX4I1;DCTN3;BAG6;MRPL20;FBL;PRDX5;TUBB3;ATP5E;AP2S1;POLR2E;CKB;COX8A;ATP6V0B;RCC2;TALDO1;NDUFC2;SOD1;RPS26;MRPL53;UQCRQ;FSCN1;TOMM6;SNRPB	DiseasePerturbations_GEO DOWN
Gamma-hydroxybutyric acidaemia C0268631 mouse GSE2866 sample 409	24/384	2.94593e-11	1.00039e-09	6.13112	148.668	GRCC10;ATP6V0B;DCTN1;GAA;RPS5;DCTN3;SGTA;RPL8;TUBB4A;ATOX1;RPS26;PCSK1N;JPH3;PITPNM1;ZMIZ2;PALM;FKBP8;SPNS1;TMEM119;APOE;CKB;NDUFV1;GIT1;SNRPB	DiseasePerturbations_GEO UP
Parkinson's disease DOID-14330 human GSE7621 sample 940	23/365	6.60968e-11	1.42733e-09	6.16144	144.424	NDUFA13;RNASEK;GPX4;RPS5;COX4I1;TALDO1;UQCR11;COX6A1;EEF2;SOD1;CST3;ENHO;UCHL1;MAG;TUBB3;UQCRQ;ATP5E;PIN1;APOE;FAU;TAC1;PFDN5;VAT1L	DiseasePerturbations_GEO DOWN
Neurofibromatosis DOID-8712 mouse GSE1482 sample 665	20/265	5.05724e-11	1.64866e-09	7.41149	175.709	NDUFA7;RNASEK;EGLN2;CHPF;NDUFB6;RPLP1;MID1IP1;RPLP0;NDUFA2;TIMM13;BMYC;UQCR11;RPL8;NISCH;CST3;UCHL1;FASN;CKB;CRYM;CSNK1G2	DiseasePerturbations_GEO UP
Neurofibromatosis DOID-8712 mouse GSE1482 sample 668	19/240	6.88577e-11	2.15842e-09	7.77895	182.02	DDR1;RNASEK;CHPF;RPLP1;GAA;TNK2;COX17;MT2;GPR37L1;COX6A1;NISCH;RPS26;CST3;SNRK;JPH3;ZMIZ2;MBP;TKT;SPTBN2	DiseasePerturbations_GEO UP
Turner Syndrome C0041408 mouse GSE1606 sample 218	20/271	7.56224e-11	2.28268e-09	7.23209	168.546	GRCC10;NDUFA7;RNASEK;NDUFB11;DCTN3;MT2;RPL8;EEF2;NISCH;PCSK1N;UQCRQ;ZMIZ2;CDC37;PALM;FKBP8;FSCN1;ROMO1;CKB;NDUFV1;SNRPB	DiseasePerturbations_GEO UP
Depression 1596 human GSE12654 sample 462	21/309	1.15952e-10	2.43805e-09	6.63644	151.827	COX8A;KCNJ4;TSC22D4;RPLP1;TNK2;COX4I1;RPL8;TUBB4A;BAG6;UCHL1;MAG;PITPNM1;TUBB3;FASN;FKBP8;POLR2E;CKB;PPIB;CRYM;NDUFV1;CAMK2G	DiseasePerturbations_GEO DOWN
Sjogren's syndrome DOID-12894 human GSE23117 sample 890	23/377	1.2575e-10	2.57627e-09	5.9489	135.615	COX8A;ATP6V0B;NDUFA13;RNASEK;GPX4;NDUFB11;NDUFC2;RPL13A;EDF1;RPL8;COX6A1;EEF2;SOD1;CST3;PRDX5;TUBB3;PPP1R1B;LCN2;EIF4H;RPLP2;ROMO1;FAU;PPIB	DiseasePerturbations_GEO DOWN
Hypertrophy, Left Ventricular C0149721 rat GSE2116 sample 248	21/313	1.47081e-10	2.83426e-09	6.54418	148.161	BCKDHA;NDUFB10;GPX4;LAMB2;GAA;COX4I1;NME2;UQCR11;EDF1;RPL8;SLC4A3;COX6A1;CST3;NDUFS7;DDT;CDC37;ATP5E;RPLP2;FAU;RPS21;TOMM6	DiseasePerturbations_GEO DOWN
Cardiac Hypertrophy C1383860 mouse GSE1621 sample 51	21/313	1.47081e-10	2.83426e-09	6.54418	148.161	BCKDHA;GRCC10;NDUFA8;ATP6V1G1;NDUFB10;NDUFB6;NDUFB11;UQCC2;RPLP1;GAA;MID1IP1;RPLP0;LPL;UQCR11;RPL8;SLC4A3;CLPP;PENK;PKIG;NDUFV1;CSNK1G2	DiseasePerturbations_GEO DOWN
Alexander Disease C0270726 mouse GSE977 sample 87	21/314	1.56001e-10	2.83426e-09	6.52151	147.263	ATP6V0B;NDUFA13;NDUFB8;RNASEK;NDUFA2;TIMM13;ABHD8;STMN3;SLC4A3;COX6A1;TUBB4A;PRDX5;PCSK1N;JPH3;UQCRQ;CDC37;PENK;TMEM119;CKB;NDUFV1;SNRPB	DiseasePerturbations_GEO DOWN
Overexertion C0161750 human GSE3606 sample 286	21/314	1.56001e-10	2.83426e-09	6.52151	147.263	COX8A;SF3B5;ATP6V1G1;NDUFB8;RPLP1;COX4I1;RPLP0;NDUFC2;RPL13A;RPL8;SOD1;RPS26;CST3;FBL;ABHD17A;RPLP2;FAU;PPIB;RPS21;PFDN5;TOMM6	DiseasePerturbations_GEO DOWN
autism spectrum disorder DOID-0060041 human GSE25507 sample 1032	22/347	1.56079e-10	2.83426e-09	6.17811	139.506	COX8A;ATP6V0B;GPX4;NDUFB11;RPS5;COX4I1;RPLP0;SNHG8;TALDO1;RPL13A;FOS;EEF2;CST3;MRPL53;FBL;UQCRQ;RPLP2;FAU;FCGR2B;RPS21;PFDN5;TOMM6	DiseasePerturbations_GEO DOWN
swine influenza DOID-0050211 human GSE48466 sample 498	21/315	1.65423e-10	2.93718e-09	6.499	146.374	COX8A;SF3B5;NDUFA13;RNASEK;GPX4;ARPC1B;RPS5;COX4I1;TALDO1;RPL13A;RPL8;EEF2;SOD1;PRDX5;UQCRQ;ROMO1;FAU;TKT;RPS21;PFDN5;TOMM6	DiseasePerturbations_GEO DOWN
Huntington's disease DOID-12858 mouse GSE3248 sample 725	20/276	1.04895e-10	3.05319e-09	7.08903	162.892	ATP6V1G1;NDUFA13;RPLP1;GAA;RPLP0;CELF4;RPL8;SLC4A3;COX6A1;EEF2;RPS26;CST3;FBL;UCHL1;PCSK1N;UQCRQ;FKBP8;FSCN1;APOE;TKT	DiseasePerturbations_GEO UP
Viral cardiomyopathy C0264797 human GSE4172 sample 384	18/227	2.16349e-10	3.75789e-09	7.76152	172.726	COX8A;NDUFA13;NDUFB10;GPX4;NDUFB11;RPS5;COX4I1;COX17;NDUFA2;NDUFC2;UQCR11;RPL8;CST3;MRPL53;NDUFS7;UQCRQ;ATP5E;FAU	DiseasePerturbations_GEO DOWN
amyotrophic lateral sclerosis DOID-332 human GSE833 sample 1007	24/416	1.53227e-10	4.1013e-09	5.62134	127.037	DDR1;COX8A;SREBF1;GPX4;RPLP1;RPS5;COX4I1;RPLP0;LPL;RPL13A;RPL8;ATOX1;CST3;PALM;FKBP8;FSCN1;EIF4H;ID3;RPLP2;APOE;CKB;JUNB;RPS21;PFDN5	DiseasePerturbations_GEO UP
Down syndrome DOID-14250 human GSE16677 sample 1064	23/381	1.5495e-10	4.1013e-09	5.88122	132.844	NDUFA8;NDUFA13;RNASEK;GPX4;NDUFB11;ARPC1B;RPLP1;RPS5;RPLP0;TALDO1;RPL13A;FOS;EEF2;SOD1;RPS26;FBL;TUBB3;UQCRQ;RPLP2;TKT;PPIB;RPS21;TOMM6	DiseasePerturbations_GEO UP
hepatocellular carcinoma DOID-684 human GSE57957 sample 660	21/314	1.56001e-10	4.1013e-09	6.52151	147.263	NDUFB7;RPLP1;RPLP0;COX17;NDUFA2;RPL8;EEF2;ATOX1;SOD1;CST3;ZNHIT1;UQCRQ;CDC37;ATP5E;FASN;LCN2;RPLP2;APOE;TKT;PFDN5;TOMM6	DiseasePerturbations_GEO UP
Alpha-1 anti-trypsin deficiency C0221757 human GSE1122 sample 281	22/356	2.54227e-10	4.32187e-09	6.00886	132.752	COX8A;ATP6V0B;ARPC1B;RPLP1;RPS5;COX4I1;RPLP0;COX17;LPL;PTPRK;RPL8;COX6A1;SOD1;CST3;FBL;FASN;EIF4H;APOE;TKT;PPIB;RPS21;PFDN5	DiseasePerturbations_GEO DOWN
Arrhythmogenic Right Ventricular Cardiomyopathy C0349788 mouse GSE4120 sample 432	20/292	2.85388e-10	4.75053e-09	6.66655	146.512	NDUFA13;NDUFA7;NDUFB7;NDUFB10;GPX4;NDUFB6;NDUFB11;LAMB2;MID1IP1;RPLP0;LPL;EDF1;CST3;DDT;ATP5E;FKBP8;RPLP2;APOE;PKIG;PPIB	DiseasePerturbations_GEO DOWN
Cardiac Failure C0018801 mouse GSE1988 sample 273	21/325	2.93762e-10	4.79012e-09	6.28199	137.879	GRCC10;NDUFA7;NDUFB7;NDUFB10;GPX4;NDUFB6;NDUFB11;UQCC2;NDUFA2;NDUFC2;UQCR11;COX6A1;CST3;PRDX5;1810037I17RIK;NDUFS7;UQCRQ;ATP5E;PPIB;RPS21;NDUFV1	DiseasePerturbations_GEO DOWN
Retinitis Pigmentosa C0035334 mouse GSE128 sample 33	19/262	3.09006e-10	4.92334e-09	7.06672	154.745	SREBF1;ATP6V0B;GPX4;DCTN3;SLC4A3;EEF2;TUBB4A;ATOX1;SNRK;PITPNM1;TUBB3;UQCRQ;DDAH2;ATP5E;PALM;FSCN1;SPNS1;APOE;CKB	DiseasePerturbations_GEO DOWN
Neurofibromatosis DOID-8712 mouse GSE1482 sample 668	22/360	3.14256e-10	4.92334e-09	5.93652	129.896	NDUFA8;ATP6V1G1;ATP6V0B;NDUFA7;NDUFB6;RPLP0;DCTN3;TIMM13;CELF4;UQCR11;SLC4A3;TUBB4A;ATOX1;SOD1;PRDX5;UCHL1;ZNHIT1;ATP5E;FKBP8;CKB;CRYM;NDUFV1	DiseasePerturbations_GEO DOWN
acute myocardial infarction DOID-9408 mouse GSE775 sample 1003	20/297	3.8494e-10	5.91475e-09	6.54454	141.872	BCKDHA;GRCC10;TSC22D4;NDUFA13;NDUFB8;NDUFA7;NDUFB10;NDUFB11;GAA;MID1IP1;COX17;NDUFA2;LPL;UQCR11;SLC4A3;SOD1;PRDX5;UQCRQ;ATP5E;FKBP8	DiseasePerturbations_GEO DOWN
Gamma-hydroxybutyric acidaemia C0268631 mouse GSE2866 sample 311	21/327	3.28664e-10	8.14093e-09	6.24029	136.263	IGSF8;SREBF1;NDUFA7;RNASEK;NDUFB7;LRP1;RGS14;RPS5;RPLP0;SGTA;MT2;GPR37L1;AGAP3;RPL8;CST3;TUBB3;FSCN1;ID3;NDUFV1;C1QC;SNRPB	DiseasePerturbations_GEO UP
amyotrophic lateral sclerosis DOID-332 mouse GSE10953 sample 681	19/263	3.29633e-10	8.14093e-09	7.0374	153.648	TSC22D4;NDUFA13;NDUFB7;GAA;TNK2;COX4I1;RPLP0;NDUFA2;RPL13A;MT2;FOS;SLC4A3;COX6A1;FSCN1;CKB;FAU;PPIB;NDUFV1;TOMM6	DiseasePerturbations_GEO UP
amyotrophic lateral sclerosis DOID-332 mouse GSE10953 sample 681	21/337	5.69065e-10	8.57893e-09	6.0397	128.567	ATP6V1G1;NDUFB8;GPX4;NDUFB6;NDUFB11;UQCC2;COX17;DCTN3;NME2;STMN3;NDUFC2;UQCR11;EDF1;KRTCAP2;NDUFS7;FKBP8;MBP;ROMO1;TKT;TAC1;RPS21	DiseasePerturbations_GEO DOWN
Gamma-hydroxybutyric acidaemia C0268631 mouse GSE2866 sample 311	19/273	6.19127e-10	8.83362e-09	6.75687	143.264	DDR1;ATP6V1G1;ATP6V0B;NDUFA13;NDUFB6;TIMM13;NME3;EDF1;COX6A1;EEF2;TUBB4A;NCOR2;PRDX5;UCHL1;MAG;ZMIZ2;MBP;CKB;TKT	DiseasePerturbations_GEO DOWN
Synovial sarcoma C0039101 mouse GSE6461 sample 22	19/273	6.19127e-10	8.83362e-09	6.75687	143.264	NDUFA8;ATP6V1G1;NDUFA13;NDUFB8;NDUFA7;NDUFB7;NDUFB10;GPX4;NDUFB6;NDUFB11;COX4I1;RPLP0;NDUFA2;NDUFC2;CST3;NDUFS7;UQCRQ;ATP5E;NDUFV1	DiseasePerturbations_GEO DOWN
Carcinoma in situ of large intestine C0686087 human GSE4183 sample 190	19/273	6.19127e-10	8.83362e-09	6.75687	143.264	COX8A;NDUFA13;NDUFB8;RPLP1;RPS5;COX4I1;RPLP0;UQCR11;RPL8;COX6A1;RPS26;CST3;PRDX5;UQCRQ;ATP5E;PPP1R1B;CKB;RPS21;C1QC	DiseasePerturbations_GEO DOWN
Down Syndrome C0013080 mouse GSE1611 sample 105	20/306	6.49741e-10	9.10778e-09	6.33566	134.027	ALAS2;NDUFB8;NDUFA7;CHPF;MID1IP1;COX17;DCTN3;NDUFA2;TIMM13;EEF2;FBL;PRDX5;UCHL1;ZNHIT1;TUBB3;UQCRQ;ATP5E;FKBP8;NDUFV1;SNRPB	DiseasePerturbations_GEO DOWN
Emery-Dreifuss muscular dystrophy, autosomal recessive form DOID-11726 mouse GSE8000 sample 677	19/266	3.99444e-10	9.57491e-09	6.95085	150.423	ATP6V1G1;GPX4;NDUFB11;RPLP1;RPS5;MID1IP1;COX17;SNHG8;MT2;RPL8;EEF2;RPS26;CST3;RPLP2;APOE;FAU;PKIG;RPS21;C1QC	DiseasePerturbations_GEO UP
Duchenne muscular dystrophy (DMD) C0013264 mouse GSE466 sample 328	21/332	4.33569e-10	1.0096e-08	6.13838	132.337	GRCC10;LRP1;NDUFB11;ARPC1B;RPS5;RPLP0;COX17;MT2;RPL8;COX6A1;EEF2;NISCH;RPS26;PRDX5;TUBB3;FKBP8;APOE;PKIG;PPIB;AP5S1;C1QC	DiseasePerturbations_GEO UP
Huntington's disease DOID-12858 mouse GSE3248 sample 727	18/246	7.97466e-10	1.09858e-08	7.10781	148.906	ATP6V1G1;NDUFB8;NDUFA7;GPX4;RPLP0;COX17;EDF1;COX6A1;TUBB4A;SNRK;JPH3;UQCRQ;FASN;PENK;TMEM119;MBP;CKB;SPTBN2	DiseasePerturbations_GEO DOWN
acute myocardial infarction DOID-9408 mouse GSE775 sample 1002	18/248	9.08418e-10	1.23021e-08	7.04528	146.678	GRCC10;NDUFA8;ALAS2;NDUFA7;NDUFB10;GPX4;NDUFB11;MID1IP1;NDUFA2;LPL;UQCR11;SLC4A3;SOD1;UQCRQ;ATP5E;TMEM119;PKIG;NDUFV1	DiseasePerturbations_GEO DOWN
Cardiac Hypertrophy C1383860 rat GSE1055 sample 354	14/133	5.76249e-10	1.30456e-08	10.4583	222.496	NDUFA7;NDUFB7;UQCC2;COX4I1;RPLP1;NDUFA2;RPL13A;UQCR11;MRPL54;UQCRQ;ATP5E;POLR2E;RPS21;TOMM6	DiseasePerturbations_GEO UP
Hepatitis, Autoimmune C0241910 mouse GSE867 sample 230	22/373	6.13711e-10	1.35182e-08	5.71283	121.178	NDUFA8;RNASEK;NDUFB7;NDUFB10;NDUFB11;RPLP1;GAA;RPS5;RPLP0;TIMM13;UQCR11;MT2;RPL8;EEF2;ATOX1;RPS26;CST3;KRTCAP2;UQCRQ;DDT;ATP5E;PPIB	DiseasePerturbations_GEO UP
GERD - Gastro-esophageal reflux disease C0017168 human GSE2144 sample 27	18/254	1.3328e-09	1.77485e-08	6.86406	140.274	DDR1;RAB5C;ARPC1B;RPLP1;RPS5;RPLP0;NDUFC2;RPL13A;UQCR11;RPL8;SOD1;RPS26;UQCRQ;FSCN1;LCN2;EIF4H;CKB;FAU	DiseasePerturbations_GEO DOWN
Huntington's disease DOID-12858 mouse GSE3621 sample 704	21/356	1.53108e-09	2.00547e-08	5.69159	115.524	ARPP21;MID1IP1;ABHD8;LPL;MT2;GPR37L1;FOS;TUBB4A;CST3;SNRK;PENK;PPP1R1B;PIN1;CAR11;MBP;APOE;CKB;CAMK2G;SH3GL2;SSBP4;SPTBN2	DiseasePerturbations_GEO DOWN
Nemaline Myopathy C0206157 mouse GSE3384 sample 160	20/324	1.75322e-09	2.25939e-08	5.95502	120.064	GRCC10;SREBF1;NDUFA8;ATP6V0B;NDUFA13;NDUFB10;RPLP1;RPS5;UQCR11;MT2;ATOX1;SOD1;CST3;ATP5E;FASN;TMEM119;APOE;TKT;NDUFV1;SNRPB	DiseasePerturbations_GEO DOWN
Hepatic lipidosis C0015695 mouse GSE5538 sample 10	20/316	1.13753e-09	2.43969e-08	6.11848	126.006	COX8A;SREBF1;NDUFA13;NDUFB8;NDUFA7;GPX4;LRP1;RPLP1;RPS5;COX4I1;RPL13A;UQCR11;COX6A1;EEF2;SOD1;RPS26;DDT;RPLP2;APOE;FAU	DiseasePerturbations_GEO UP
colon adenoma DOID-0050912 mouse GSE422 sample 650	23/427	1.42803e-09	2.98423e-08	5.19922	105.892	SF3B5;ATP6V1G1;NDUFA7;EGLN2;RPLP1;RPS5;TNK2;RPLP0;DCTN3;TIMM13;NME3;RPL13A;FOS;RPL8;SOD1;NISCH;RPS26;CST3;GRHPR;1810037I17RIK;UQCRQ;TMEM119;ROMO1	DiseasePerturbations_GEO UP
Type 1 diabetes mellitus C0011854 mouse GSE1623 sample 53	21/371	3.19671e-09	4.05424e-08	5.44346	106.48	SF3B5;NDUFB8;GPX4;NDUFB11;UQCC2;TALDO1;NME3;LPL;UQCR11;EDF1;DOHH;NISCH;NCOR2;KRTCAP2;DPM3;CLPP;TMEM119;POLR2E;ROMO1;EIF2S3Y;PPIB	DiseasePerturbations_GEO DOWN
skin squamous cell carcinoma DOID-3151 human GSE2503 sample 627	21/373	3.51649e-09	4.39012e-08	5.41197	105.348	GPX4;NDUFB6;NDUFB11;RPLP1;RPS5;RPLP0;TALDO1;NDUFC2;RPL13A;UQCR11;FOS;RPL8;EEF2;SOD1;FBL;UQCRQ;ATP5E;FAU;RPS21;PFDN5;TOMM6	DiseasePerturbations_GEO DOWN
Type 2 diabetes mellitus C0011860 mouse GSE642 sample 320	19/306	4.12492e-09	5.07048e-08	5.96983	115.255	GRCC10;NDUFB11;RPLP0;COX17;LPL;RPL8;ATOX1;SOD1;RPS26;KRTCAP2;PRDX5;1810037I17RIK;DPM3;UQCRQ;ATP5E;TMEM119;ROMO1;PPIB;CSNK1G2	DiseasePerturbations_GEO DOWN
cervical cancer DOID-4362 human GSE9750 sample 619	20/335	3.11189e-09	6.34049e-08	5.74382	112.51	COX8A;NDUFA8;RPS5;RPL8;COX6A1;EEF2;UCHL1;TUBB3;UQCRQ;ATP5E;AP2S1;EIF4H;ID3;MCM6;TKT;PPIB;RPS21;AVPI1;TOMM6;SNRPB	DiseasePerturbations_GEO UP
Status Epilepticus C0038220 rat GSE4236 sample 391	20/336	3.27473e-09	6.44789e-08	5.72535	111.856	DCTN1;ARPC1B;GAA;RPS5;NME2;RPL13A;FOS;RPL8;EEF2;RPS26;CST3;VGF;EIF4H;APOE;CKB;TAC1;FCGR2B;JUNB;RPS21;PLEC	DiseasePerturbations_GEO UP
Hypercholesteremia C0020443 mouse GSE3889 sample 221	19/302	3.32284e-09	6.44789e-08	6.05546	118.217	GPX4;RPLP1;RPS5;RPLP0;NME2;LPL;RPL13A;RPL8;COX6A1;ATOX1;RPS26;PRDX5;LCN2;RPLP2;APOE;FAU;TKT;PPIB;C1QC	DiseasePerturbations_GEO UP
Dehydration C0011175 rat GSE3110 sample 443	20/337	3.44543e-09	6.49881e-08	5.70699	111.208	ATP6V0B;CHPF;NDUFB6;NDUFB11;DCTN3;NME2;TIMM13;STMN3;TALDO1;NDUFC2;FOS;COX6A1;TUBB4A;PRDX5;UCHL1;TPPP3;VGF;TUBB3;UQCRQ;ATP5E	DiseasePerturbations_GEO UP
autism spectrum disorder DOID-0060041 human GSE25507 sample 1029	19/303	3.50856e-09	6.49881e-08	6.03383	117.467	NDUFA13;GPX4;ARPC1B;RPS5;COX4I1;RPLP0;RPL13A;EDF1;RPL8;CST3;FBL;UQCRQ;ABHD17A;RPLP2;FAU;TKT;RPS21;PFDN5;TOMM6	DiseasePerturbations_GEO UP
nemaline myopathy DOID-3191 mouse GSE3384 sample 972	21/374	3.68729e-09	6.6781e-08	5.39636	104.789	ATP6V1G1;RNASEK;EGLN2;NDUFB7;GPX4;DCTN1;RPS5;NDUFA2;SGTA;UQCR11;JOSD2;RPL8;EEF2;CST3;ZNHIT1;ZMIZ2;CDC37;FSCN1;PKIG;NDUFV1;CSNK1G2	DiseasePerturbations_GEO UP
Emery-Dreifuss muscular dystrophy DOID-11726 mouse GSE6399 sample 675	20/347	5.66956e-09	6.8636e-08	5.52962	104.997	COX8A;NDUFA8;ALAS2;NDUFB7;UQCC2;RPLP1;RPLP0;UQCR11;MT2;JOSD2;COX6A1;CST3;UQCRQ;ATP5E;RPLP2;CKB;FAU;PKIG;PPIB;PLEC	DiseasePerturbations_GEO DOWN
Gamma-hydroxybutyric acidaemia C0268631 mouse GSE2866 sample 409	16/216	6.00421e-09	7.16025e-08	7.14703	135.299	NDUFB8;NDUFA7;RNASEK;NDUFB6;RPLP1;TIMM13;COX6A1;SOD1;NISCH;CST3;PRDX5;MAG;TUBB3;UQCRQ;PENK;MBP	DiseasePerturbations_GEO DOWN
RA (rheumatoid arthritis) C0003873 human GSE1919 sample 110	19/314	6.29173e-09	7.39279e-08	5.80556	109.632	COX8A;SREBF1;GPX4;RPS5;NME2;LPL;FOS;RPL8;EEF2;SOD1;FBL;FASN;ID3;RPLP2;APOE;FAU;TKT;JUNB;PFDN5	DiseasePerturbations_GEO DOWN
Senescence C0001792 rat GSE3531 sample 167	19/308	4.58991e-09	8.13213e-08	5.92791	113.812	NDUFA8;GPX4;DCTN1;RPS5;RPL8;RPS26;CST3;UCHL1;INF2;NDUFS7;DDT;CDC37;NOS1AP;AP2S1;MBP;APOE;CKB;GIT1;SPTBN2	DiseasePerturbations_GEO UP
Muscular Dystrophy C0026850 mouse GSE2629 sample 18	19/309	4.84016e-09	8.39304e-08	5.90717	113.101	ALAS2;NDUFB10;RPS5;TIMM13;UQCR11;FOS;RPL8;COX6A1;ATOX1;RPS26;KRTCAP2;PRDX5;DDAH2;FSCN1;TMEM119;PPIB;CSNK1G2;C1QC;SNRPB	DiseasePerturbations_GEO UP
Dystonia C0393593 human GSE3064 sample 329	19/317	7.34592e-09	8.50636e-08	5.74622	107.622	KCNJ4;NDUFA8;NDUFB8;ARPP21;COX4I1;LPL;COX6A1;EEF2;TUBB4A;NISCH;RPS26;CST3;UCHL1;PCSK1N;PENK;TAC1;CRYM;RPS21;SH3GL2	DiseasePerturbations_GEO DOWN
Niemann-Pick disease Type C DOID-14504 mouse GSE39621 sample 469	19/310	5.10297e-09	8.66442e-08	5.88657	112.395	ATP6V0B;ALAS2;2410006H16RIK;GPX4;COX4I1;SNHG8;NME2;RPL13A;MT2;GPR37L1;COX6A1;CST3;SNRK;PITPNM1;ID3;APOE;FAU;CAMK2G;C1QC	DiseasePerturbations_GEO UP
Cancer of the Stomach C0024623 human GSE2685 sample 361	20/346	5.39846e-09	8.97908e-08	5.54687	105.597	DDR1;GPX4;ARPC1B;RPLP1;RPS5;RPL13A;RPL8;EEF2;SOD1;FBL;AP2S1;FSCN1;LCN2;RPLP2;APOE;TKT;PPIB;JUNB;RPS21;SNRPB	DiseasePerturbations_GEO UP
Dry eye syndrome C0013238 rat GSE844 sample 228	19/320	8.56125e-09	9.77206e-08	5.68808	105.662	DDR1;COX8A;BCKDHA;GPX4;DCTN1;GAA;COX4I1;RPLP0;NME2;TALDO1;UQCR11;COX6A1;EEF2;SOD1;PPIB;JUNB;CSNK1G2;SMIM12;TOMM6	DiseasePerturbations_GEO DOWN
Malignant Melanoma C0025202 human GSE3189 sample 117	20/350	6.5604e-09	1.05894e-07	5.47851	103.227	ATP6V1G1;ATP6V0B;NDUFA13;GPX4;ARPC1B;RPLP1;RPS5;RPL8;COX6A1;EEF2;SOD1;BAG6;TUBB3;ABHD17A;AP2S1;APOE;TKT;PPIB;TOMM6;SNRPB	DiseasePerturbations_GEO UP
familial hypercholesterolemia DOID-13810 human GSE6054 sample 909	19/315	6.62649e-09	1.05894e-07	5.78565	108.956	ALAS2;NDUFB8;GPX4;NDUFB11;ARPC1B;RPLP1;RPLP0;TALDO1;RPL13A;UQCR11;EDF1;FOS;RPS26;CST3;BAG6;ABHD17A;ATP5E;AP2S1;FAU	DiseasePerturbations_GEO UP
Wilson disease DOID-893 mouse GSE5348 sample 966	19/316	6.97764e-09	1.09361e-07	5.76587	108.286	COX8A;NDUFA8;NDUFA13;ALAS2;NDUFB8;NDUFA7;RPLP1;RPS5;NME2;LPL;MT2;COX6A1;EEF2;ATOX1;RPS26;GRHPR;NDUFS7;APOE;PPIB	DiseasePerturbations_GEO UP
Huntington's disease DOID-12858 mouse GSE3621 sample 702	18/289	1.02163e-08	1.14969e-07	5.96684	109.786	NDUFA13;ARPP21;RGS14;RPLP1;LPL;MT2;FOS;TUBB4A;CST3;PENK;PPP1R1B;PIN1;CAR11;APOE;CKB;FAU;CRYM;SSBP4	DiseasePerturbations_GEO DOWN
Familial hypophosphataemic rickets C0733682 mouse GSE868 sample 172	19/324	1.04713e-08	1.16202e-07	5.61233	103.124	ATP6V1G1;NDUFA13;NDUFB10;NDUFB6;RPLP0;NDUFA2;TIMM13;UQCR11;RPL8;COX6A1;ATOX1;SOD1;PRDX5;UQCRQ;ATP5E;FASN;FKBP8;ROMO1;CKB	DiseasePerturbations_GEO DOWN
Alexander Disease C0270726 mouse GSE977 sample 87	18/286	8.68418e-09	1.31067e-07	6.03456	112.012	DDR1;TSC22D4;LRP1;RPLP1;GAA;RPS5;RPLP0;TALDO1;MT2;RPL8;RPS26;CST3;TUBB3;DDAH2;LCN2;ID3;APOE;C1QC	DiseasePerturbations_GEO UP
Senescence C0001792 rat GSE854 sample 161	18/286	8.68418e-09	1.31067e-07	6.03456	112.012	COX8A;SREBF1;GPX4;RPS5;TNK2;RPLP0;EEF2;CST3;MAG;DDT;ATP5E;NOS1AP;RPLP2;MBP;FAU;RPS21;GIT1;PLEC	DiseasePerturbations_GEO UP
Fracture of femur C0015802 rat GSE1685 sample 240	22/432	9.20475e-09	1.36398e-07	4.87587	90.2209	COX8A;ARPC1B;GAA;RPS5;RPLP0;NME2;TALDO1;NDUFC2;RPL13A;RPL8;COX6A1;EEF2;RPS26;CST3;EIF4H;ID3;RPLP2;APOE;CKB;FAU;RPS21;TOMM6	DiseasePerturbations_GEO UP
Congestive heart disease C0018802 mouse GSE2236 sample 258	19/328	1.27681e-08	1.3975e-07	5.53854	100.67	GRCC10;NDUFA8;NDUFA13;NDUFA7;NDUFB7;NDUFB10;NDUFB11;COX4I1;RPLP0;COX17;NDUFA2;LPL;UQCR11;FOS;NDUFS7;ATP5E;ROMO1;PKIG;NDUFV1	DiseasePerturbations_GEO DOWN
prostate cancer DOID-10283 human GSE3868 sample 638	17/256	1.02975e-08	1.49865e-07	6.371	117.171	COX8A;NDUFA13;RPLP1;TALDO1;RPL13A;FOS;COX6A1;ATOX1;SOD1;UCHL1;TUBB3;UQCRQ;ATP5E;AP2S1;EIF4H;FAU;TOMM6	DiseasePerturbations_GEO UP
Infantile neuronal ceroid lipofuscinosis C0268281 mouse GSE6678 sample 141	17/262	1.45292e-08	1.56876e-07	6.21307	112.128	COX8A;NDUFA8;NDUFA13;ARPP21;NDUFB6;COX4I1;STMN3;UQCR11;COX6A1;TUBB4A;UCHL1;TPPP3;TUBB3;PENK;PPP1R1B;SPTBN2;TOMM6	DiseasePerturbations_GEO DOWN
rheumatoid arthritis DOID-7148 human GSE10500 sample 779	20/368	1.52557e-08	1.62524e-07	5.19032	93.4171	ATP6V0B;RAB5C;GPX4;ARPC1B;GAA;RPS5;COX4I1;NME2;TALDO1;UQCR11;FOS;EEF2;NISCH;AP2S1;POLR2E;RPLP2;TKT;JUNB;PFDN5;PLEC	DiseasePerturbations_GEO DOWN
Thrombocytopenia C0040034 mouse GSE2527 sample 253	16/226	1.14566e-08	1.63809e-07	6.80322	124.395	2410006H16RIK;RCC2;RPLP1;RPS5;RPLP0;SNHG8;RPL13A;MT2;RPL8;EEF2;RPS26;RPLP2;APOE;FAU;RPS21;SNRPB	DiseasePerturbations_GEO UP
Status Epilepticus C0038220 rat GSE4236 sample 391	17/264	1.62611e-08	1.70956e-07	6.16213	110.515	COX8A;NDUFA8;ALAS2;NDUFB8;GPX4;NDUFB6;COX4I1;RPLP0;LPL;UQCR11;COX6A1;ATP5E;RPLP2;MBP;FAU;SH3GL2;TOMM6	DiseasePerturbations_GEO DOWN
Emery-Dreifuss muscular dystrophy, autosomal dominant form DOID-11726 mouse GSE8000 sample 676	17/265	1.71964e-08	1.7844e-07	6.13697	109.72	NDUFA13;ALAS2;NDUFB8;NDUFA7;NDUFB7;NDUFB10;UQCC2;COX4I1;RPLP0;NME2;NDUFC2;UQCR11;CST3;PRDX5;1810037I17RIK;UQCRQ;ATP5E	DiseasePerturbations_GEO DOWN
Vitamin A Deficiency C0042842 rat GSE1600 sample 359	19/335	1.79368e-08	1.83737e-07	5.4139	96.5645	COX8A;NDUFA8;ALAS2;GPX4;NDUFB6;RPLP0;NME2;TALDO1;RPL13A;UQCR11;RPL8;SOD1;RPS26;DDT;FASN;RPLP2;FAU;TKT;PPIB	DiseasePerturbations_GEO DOWN
Retinoschisis C0152439 mouse GSE5581 sample 146	21/404	1.42626e-08	2.00414e-07	4.96598	89.7136	SREBF1;ATP6V0B;NDUFA13;NDUFA7;NDUFB10;GPX4;NDUFB11;NME2;STMN3;RPL13A;RPL8;PRRC2A;RPS26;NDUFS7;DDT;ABHD17A;EIF4H;TKT;PPIB;RPS21;TOMM6	DiseasePerturbations_GEO UP
diffuse large B-cell lymphoma DOID-0050745 mouse GSE6136 sample 688	17/263	1.53728e-08	2.05385e-07	6.1875	111.317	GRCC10;ALAS2;NDUFA7;EGLN2;GPX4;NDUFB11;COX4I1;NDUFC2;UQCR11;FOS;RPL8;CST3;ATP5E;APOE;PKIG;PFDN5;C1QC	DiseasePerturbations_GEO UP
Huntington's disease DOID-12858 mouse GSE3248 sample 723	17/263	1.53728e-08	2.05385e-07	6.1875	111.317	GRCC10;NDUFB8;NDUFB6;RPLP0;NDUFA2;TIMM13;UQCR11;FOS;COX6A1;TUBB4A;RPS26;CST3;SNRK;TUBB3;UQCRQ;ATP5E;PPIB	DiseasePerturbations_GEO UP
asthma DOID-2841 human GSE16032 sample 729	18/297	1.56004e-08	2.05385e-07	5.79337	104.141	SF3B5;COX4I1;SNHG8;EDF1;RPL8;EEF2;MRPL54;SOD1;RPS26;FBL;ABHD17A;SPNS1;EIF4H;RPLP2;FAU;JUNB;RPS21;PFDN5	DiseasePerturbations_GEO UP
Cancer of prostate C0376358 human GSE3868 sample 135	16/231	1.56244e-08	2.05385e-07	6.6433	119.41	COX8A;NDUFA13;RPLP1;TALDO1;RPL13A;FOS;COX6A1;ATOX1;CST3;TUBB3;UQCRQ;ATP5E;PENK;AP2S1;FAU;TOMM6	DiseasePerturbations_GEO UP
Essential Hypertension C0085580 rat GSE1675 sample 412	18/299	1.73038e-08	2.23851e-07	5.75155	102.794	DDR1;BCKDHA;MAP2K2;LAMB2;RPS5;COX4I1;RPLP0;NME2;TALDO1;RPL8;EEF2;SOD1;RPS26;DDT;CDC37;APOE;JUNB;TOMM6	DiseasePerturbations_GEO UP
acute myocardial infarction DOID-9408 mouse GSE775 sample 1004	18/301	1.91769e-08	2.44205e-07	5.71031	101.47	RNASEK;CHPF;LRP1;ARPC1B;RPLP1;RPS5;RPLP0;MT2;ATOX1;RPS26;CST3;UCHL1;TMEM119;APOE;PPIB;C1QC;SNRPB;PLEC	DiseasePerturbations_GEO UP
Treacher Collins syndrome DOID-2908 mouse GSE10167 sample 480	19/342	2.49777e-08	2.52622e-07	5.29466	92.6846	SF3B5;GPX4;NDUFB11;RCC2;COX4I1;NDUFA2;SNHG8;TIMM13;COX6A1;CST3;KRTCAP2;NDUFS7;DDAH2;ATP5E;ADPRH;ID3;ROMO1;FAU;PPIB	DiseasePerturbations_GEO DOWN
Type 2 diabetes mellitus C0011860 rat GSE6428 sample 291	17/269	2.1452e-08	2.68975e-07	6.03832	106.621	COX8A;GRCC10;NDUFB10;NDUFB11;COX4I1;RPLP0;COX17;NDUFA2;COX6A1;SOD1;UQCRQ;AP2S1;EIF4H;ID3;ROMO1;FAU;SNRPB	DiseasePerturbations_GEO UP
amyotrophic lateral sclerosis DOID-332 mouse GSE3343 sample 685	22/462	3.06307e-08	3.05925e-07	4.53638	78.4852	COX8A;IGSF8;TSC22D4;HDAC5;ATP6V0B;NDUFA13;NDUFB8;RPLP1;GAA;COX4I1;MID1IP1;NME2;CELF4;STMN3;RPL13A;GPR37L1;TUBB4A;UCHL1;PCSK1N;RPLP2;CAMK2G;SH3GL2	DiseasePerturbations_GEO DOWN
nemaline myopathy DOID-3191 mouse GSE3384 sample 977	20/379	2.49146e-08	3.07658e-07	5.02844	88.0369	ZBTB17;HDAC5;NDUFA8;EGLN2;NDUFB11;RPLP0;COX17;NDUFA2;TIMM13;LPL;UQCR11;MT2;RPL8;NCOR2;CST3;UQCRQ;TMEM119;PKIG;CSNK1G2;SNRPB	DiseasePerturbations_GEO UP
pancreatic ductal adenocarcinoma DOID-3498 mouse GSE53659 sample 699	23/499	2.66852e-08	3.24604e-07	4.39638	76.6691	NDUFA13;GPX4;NDUFB11;RPS5;COX4I1;RPLP0;NME2;TALDO1;RPL13A;RPL8;COX6A1;RPS26;CST3;PRDX5;LCN2;RPLP2;APOE;CKB;FAU;TKT;FCGR2B;RPS21;C1QC	DiseasePerturbations_GEO UP
ALS (Amyotrophic Lateral Sclerosis) C0002736 human GSE833 sample 283	19/345	2.87115e-08	3.44116e-07	5.24513	91.0867	DDR1;COX8A;SREBF1;RPLP1;RPS5;RPLP0;RPL8;TUBB4A;CST3;PALM;FKBP8;FSCN1;EIF4H;ID3;RPLP2;APOE;CKB;RPS21;PLEC	DiseasePerturbations_GEO UP
Senescence C0001792 rat GSE854 sample 161	18/314	3.66611e-08	3.61632e-07	5.45588	93.4131	NDUFA8;NDUFB8;NDUFB10;NDUFB6;RGS14;CCDC124;TALDO1;LPL;NDUFC2;UQCR11;RPS26;UCHL1;VGF;AP2S1;PIN1;CKB;PPIB;TOMM6	DiseasePerturbations_GEO DOWN
Dermatomyositis C0011633 human GSE5370 sample 334	17/280	3.8615e-08	3.76261e-07	5.7825	98.7051	COX8A;NDUFA13;NDUFB11;RPLP1;RPS5;COX4I1;MID1IP1;RPL13A;UQCR11;FOS;RPL8;EEF2;RPS26;CST3;UQCRQ;NDUFV1;PFDN5	DiseasePerturbations_GEO DOWN
Muscular Dystrophy C0026850 mouse GSE2507 sample 405	17/278	3.47751e-08	4.06571e-07	5.82741	100.082	GRCC10;NDUFB8;NDUFB7;MID1IP1;COX17;NDUFA2;LPL;UQCR11;MT2;SLC4A3;COX6A1;SOD1;1810037I17RIK;UQCRQ;FASN;TMEM119;TKT	DiseasePerturbations_GEO UP
Duchenne muscular dystrophy (DMD) C0013264 mouse GSE1026 sample 72	18/313	3.49202e-08	4.06571e-07	5.47465	94.0009	TSC22D4;ATP6V0B;ALAS2;CHPF;GPX4;RPLP1;RPS5;RPLP0;COX17;MT2;FOS;RPL8;COX6A1;TUBB3;FSCN1;APOE;CKB;C1QC	DiseasePerturbations_GEO UP
Smoldering multiple myeloma C1531608 human GSE5900 sample 404	20/388	3.67272e-08	4.21587e-07	4.90319	83.9413	COX8A;ATP6V1G1;NDUFB11;ARPC1B;RPL13A;EDF1;FOS;RPL8;EEF2;SOD1;FBL;KRTCAP2;PRDX5;UQCRQ;RPLP2;FAU;FCGR2B;JUNB;PFDN5;SNRPB	DiseasePerturbations_GEO UP
Type 2 diabetes mellitus C0011860 rat GSE3068 sample 335	17/285	4.99734e-08	4.81069e-07	5.67317	95.376	COX8A;SREBF1;NDUFA8;NDUFB8;NDUFB10;NDUFB6;UQCC2;COX4I1;SGTA;NME2;NDUFC2;UQCR11;COX6A1;EEF2;NDUFS7;RXRG;SNRPB	DiseasePerturbations_GEO DOWN
rheumatoid arthritis DOID-7148 human GSE15573 sample 904	18/321	5.12616e-08	4.81859e-07	5.32792	89.4362	COX8A;TSC22D4;NDUFB8;RCC2;COX4I1;RPLP0;STMN3;RPL13A;RPL8;EEF2;CST3;KRTCAP2;NDUFS7;CDC37;AP2S1;RPLP2;MBP;SNRPB	DiseasePerturbations_GEO DOWN
PTSD - Post-traumatic stress disorder C0038436 human GSE860 sample 338	18/321	5.12616e-08	4.81859e-07	5.32792	89.4362	NDUFB8;RAB5C;GPX4;RPS5;RPLP0;NDUFA2;NME2;COX6A1;EEF2;SOD1;CST3;ZNHIT1;NDUFS7;UQCRQ;AP2S1;FAU;PPIB;NDUFV1	DiseasePerturbations_GEO DOWN
Dehydration C0011175 rat GSE4130 sample 210	18/322	5.3736e-08	4.99245e-07	5.31012	88.8871	NDUFA8;NDUFB10;LRP1;UQCC2;RPLP1;RPS5;MID1IP1;RPLP0;RPL13A;UQCR11;GPR37L1;RPL8;RPS26;CST3;MBP;APOE;CKB;PFDN5	DiseasePerturbations_GEO DOWN
Anxiety Disorder C0003469 rat GSE932 sample 111	19/358	5.16149e-08	5.84253e-07	5.04062	84.5788	DDR1;COX8A;RPS5;TNK2;COX4I1;RPLP0;TALDO1;RPL8;SLC4A3;SOD1;BAG6;CDC37;ID3;MBP;APOE;CKB;FAU;SMIM12;PLEC	DiseasePerturbations_GEO UP
Huntington's disease DOID-12858 human GSE3248 sample 724	17/288	5.8179e-08	6.49533e-07	5.6095	93.4528	SREBF1;ATP6V1G1;RNASEK;NDUFB11;RPLP1;RPLP0;TIMM13;CELF4;RPL8;SLC4A3;RPS26;CST3;UCHL1;PCSK1N;MBP;APOE;EIF2S3Y	DiseasePerturbations_GEO UP
Lung Injury C0273115 human GSE1541 sample 67	16/254	5.90219e-08	6.50038e-07	5.99424	99.7763	COX8A;SREBF1;MAP2K2;RAB5C;GAA;RPS5;NDUFC2;COX6A1;CST3;UQCRQ;AP2S1;EIF4H;POLR2E;ID3;PFDN5;SNRPB	DiseasePerturbations_GEO UP
Senescence C0001792 rat GSE3531 sample 167	17/292	7.10373e-08	6.524e-07	5.52677	90.971	DDR1;COX8A;NDUFB6;RGS14;NDUFB11;RPLP0;NME2;TALDO1;LPL;NDUFC2;UQCR11;COX6A1;SOD1;ATP5E;RPLP2;RPS21;SMIM12	DiseasePerturbations_GEO DOWN
Hypertrophy, Left Ventricular C0149721 mouse GSE2459 sample 382	17/289	6.11767e-08	6.59397e-07	5.58859	92.8237	ZBTB17;MAP2K2;GPX4;LRP1;GAA;TNK2;RPLP0;TIMM13;DOHH;TPGS1;EEF2;CST3;BAG6;FBL;MAG;TMEM119;SNRPB	DiseasePerturbations_GEO UP
Muscular Dystrophy C0026850 mouse GSE3252 sample 158	19/362	6.14898e-08	6.59397e-07	4.98081	82.7033	NDUFB8;NDUFB7;GPX4;LRP1;RPLP1;RPS5;RPL13A;MT2;EEF2;RPS26;CST3;ATP5E;RPLP2;APOE;FAU;PPIB;RPS21;C1QC;TOMM6	DiseasePerturbations_GEO UP
Turner Syndrome C0041408 mouse GSE1606 sample 218	18/329	7.43664e-08	6.75213e-07	5.18873	85.1692	ATP6V0B;RAB5C;MAP1S;RPLP1;TIMM13;CELF4;COX6A1;TUBB4A;ATOX1;RPS26;PRDX5;ZNHIT1;TUBB3;DDAH2;ATP5E;TMEM119;APOE;PPIB	DiseasePerturbations_GEO DOWN
Atherosclerosis C0004153 human GSE420 sample 234	18/326	6.4769e-08	6.85542e-07	5.24008	86.7361	GPX4;ARPC1B;RPS5;RPLP0;NME2;RPL8;EEF2;ADRA2A;DDAH2;ADPRH;AP2S1;POLR2E;RPLP2;PPIB;JUNB;RPS21;AHDC1;PLEC	DiseasePerturbations_GEO UP
testis seminoma DOID-5842 human GSE8607 sample 622	16/257	6.94346e-08	7.25503e-07	5.91872	97.5575	ARPC1B;RPLP1;RPS5;RPLP0;NME2;RPL13A;RPL8;EEF2;SOD1;FBL;RPLP2;APOE;MCM6;PPIB;RPS21;SNRPB	DiseasePerturbations_GEO UP
Waldenstrom Macroglobulinemia UMLS CUI-C0024419 human GSE6691 sample 784	17/293	7.46339e-08	7.69957e-07	5.50647	90.3648	COX8A;ATP6V0B;NDUFA13;ALAS2;GPX4;NME3;UQCR11;EDF1;FOS;COX6A1;DPM3;ADORA2A;LCN2;PPIB;FCGR2B;JUNB;TOMM6	DiseasePerturbations_GEO UP
Familial combined hyperlipidaemia C0020474 human GSE1010 sample 137	15/226	7.81029e-08	7.95674e-07	6.31861	103.406	SF3B5;RPS5;COX4I1;RPLP0;RPL13A;UQCR11;COX6A1;EEF2;ATOX1;TUBB3;EIF4H;RPLP2;FAU;PPIB;TOMM6	DiseasePerturbations_GEO UP
nemaline myopathy DOID-3191 mouse GSE3384 sample 976	21/450	9.00298e-08	8.08245e-07	4.42298	71.7545	GRCC10;SREBF1;NDUFA8;ATP6V0B;NDUFA13;NDUFB8;RNASEK;NDUFB11;RPLP1;RPS5;MT2;COX6A1;SOD1;RPS26;CST3;DDT;FASN;APOE;TKT;NDUFV1;C1QC	DiseasePerturbations_GEO DOWN
Purpura, Idiopathic Thrombocytopenic C0043117 human GSE574 sample 358	23/531	8.25935e-08	8.31034e-07	4.1126	67.0738	NDUFB8;RAB5C;ARPC1B;RPS5;COX4I1;RPLP0;NME2;FOS;RPL8;COX6A1;EEF2;SOD1;FBL;UQCRQ;CDC37;EIF4H;RPLP2;FAU;PPIB;JUNB;NDUFV1;PFDN5;SNRPB	DiseasePerturbations_GEO UP
multiple sclerosis DOID-2377 human GSE16461 sample 584	21/452	9.69945e-08	8.61096e-07	4.402	71.0862	COX8A;SF3B5;ATP6V1G1;RNASEK;RPLP1;COX4I1;MID1IP1;DCTN3;RPL8;SOD1;RPS26;FBL;ABHD17A;ATP5E;EIF4H;RPLP2;JUNB;RPS21;PFDN5;TOMM6;SNRPB	DiseasePerturbations_GEO DOWN
Spinal Muscular Atrophy, Infantile C0043116 mouse GSE3075 sample 126	13/168	9.90739e-08	8.69891e-07	7.4086	119.481	COX8A;ALAS2;TNK2;COX4I1;MT2;GPR37L1;EEF2;TUBB4A;MAG;TPPP3;EIF4H;MBP;CKB	DiseasePerturbations_GEO DOWN
Myocardial Infarction C0027051 rat GSE4105 sample 437	16/264	1.00543e-07	8.73198e-07	5.74959	92.6414	NDUFA8;NDUFB10;NDUFB6;UQCC2;COX4I1;MID1IP1;LPL;NDUFC2;UQCR11;SOD1;NDUFS7;UQCRQ;DDT;ATP5E;LCN2;NDUFV1	DiseasePerturbations_GEO DOWN
Hepatic Cirrhosis C0023890 rat GSE1843 sample 372	17/297	9.07465e-08	9.01931e-07	5.42669	87.9948	ARPC1B;RPLP1;RPS5;RPLP0;NME2;LPL;RPL13A;RPL8;EEF2;RPS26;CST3;ATP5E;LCN2;FAU;PKIG;PPIB;RPS21	DiseasePerturbations_GEO UP
Huntington's disease DOID-12858 mouse GSE3248 sample 723	18/337	1.0668e-07	9.16531e-07	5.05653	81.1746	IGSF8;ABCA2;HDAC5;GAA;SGTA;GPR37L1;UCHL1;ZMIZ2;PALM;FKBP8;FSCN1;MBP;APOE;CKB;TKT;NDUFV1;SPTBN2;SNRPB	DiseasePerturbations_GEO DOWN
Emery-Dreifuss muscular dystrophy, autosomal dominant form DOID-11726 mouse GSE8000 sample 676	18/335	9.75777e-08	9.50251e-07	5.08895	82.149	ATP6V1G1;RPLP1;RPS5;MID1IP1;COX17;LPL;RPL13A;RPL8;SLC4A3;EEF2;SOD1;RPS26;SNRK;APOE;FAU;RPS21;NDUFV1;C1QC	DiseasePerturbations_GEO UP
COPD - Chronic obstructive pulmonary disease C0024117 human GSE1650 sample 36	20/412	9.79399e-08	9.50251e-07	4.59729	74.1953	NDUFA13;GPX4;RPLP1;RPLP0;RPL13A;UQCR11;EDF1;FOS;RPL8;EEF2;NISCH;FBL;ATP5E;RPLP2;CKB;FAU;TKT;PPIB;RPS21;PFDN5	DiseasePerturbations_GEO UP
Myocardial Infarction C0027051 rat GSE4105 sample 437	18/336	1.02036e-07	9.78345e-07	5.07269	81.6598	COX8A;ALAS2;ARPC1B;RPLP1;RPS5;RPLP0;NME2;RPL13A;RPL8;EEF2;RPS26;CST3;EIF4H;APOE;FAU;PPIB;RPS21;C1QC	DiseasePerturbations_GEO UP
Gastrointestinal stromal tumor C0238198 human GSE2719 sample 270	19/376	1.11352e-07	1.05525e-06	4.78203	76.5631	COX8A;SF3B5;ATP6V1G1;NDUFA13;COX17;DCTN3;RPL13A;UQCR11;RPL8;COX6A1;SOD1;UCHL1;UQCRQ;PENK;AP2S1;TKT;TAC1;PFDN5;TOMM6	DiseasePerturbations_GEO UP
systemic lupus erythematosus DOID-9074 mouse GSE2376 sample 633	16/269	1.30019e-07	1.10516e-06	5.63452	89.3387	GRCC10;RPS5;COX4I1;RPLP0;NDUFA2;SNHG8;FOS;RPL8;COX6A1;CST3;1810037I17RIK;ATP5E;FAU;PPIB;JUNB;PFDN5	DiseasePerturbations_GEO DOWN
Vulvar intraepithelial tumor UMLS CUI-C0346210 human GSE5563 sample 967	16/270	1.36782e-07	1.15041e-06	5.61205	88.6978	COX8A;RPS5;RPLP0;SNHG8;RPL13A;FOS;RPL8;EEF2;SOD1;RPS26;FASN;RPLP2;APOE;FAU;TKT;PFDN5	DiseasePerturbations_GEO DOWN
amyotrophic lateral sclerosis DOID-332 human GSE833 sample 1006	18/341	1.27257e-07	1.19212e-06	4.99288	79.2723	DDR1;COX8A;RPLP1;RPS5;RPLP0;RPL8;TUBB4A;CST3;PALM;FKBP8;FSCN1;EIF4H;ID3;RPLP2;APOE;CKB;RPS21;PLEC	DiseasePerturbations_GEO UP
hepatitis C DOID-1883 human GSE20948 sample 600	17/307	1.45866e-07	1.21403e-06	5.23687	82.4314	COX8A;RAB5C;ARPC1B;NDUFC2;EEF2;SOD1;RPS26;GRHPR;TUBB3;UQCRQ;ABHD17A;ID3;CKB;MCM6;PPIB;RPS21;PFDN5	DiseasePerturbations_GEO DOWN
amyotrophic lateral sclerosis DOID-332 mouse GSE10953 sample 680	20/423	1.49838e-07	1.3877e-06	4.46927	70.2288	NDUFA8;RPLP1;RPS5;COX4I1;RPLP0;COX17;DCTN3;NDUFA2;RPL13A;UQCR11;MT2;RPL8;SOD1;CST3;JPH3;EIF4H;MBP;CKB;TKT;TAC1	DiseasePerturbations_GEO UP
retinoblastoma DOID-768 mouse GSE6787 sample 455	14/207	1.69708e-07	1.39791e-06	6.42412	100.147	ALAS2;RAB5C;RPLP1;RPLP0;TIMM13;UQCR11;MT2;JOSD2;RPL8;COX6A1;ATOX1;1810037I17RIK;UQCRQ;FKBP8	DiseasePerturbations_GEO DOWN
prostate cancer DOID-10283 human GSE3868 sample 639	15/238	1.53552e-07	1.40612e-06	5.97493	93.742	COX8A;NDUFA13;RPLP1;TALDO1;RPL13A;COX6A1;ATOX1;CST3;TUBB3;UQCRQ;ATP5E;PENK;AP2S1;FAU;TOMM6	DiseasePerturbations_GEO UP
Essential Thrombocytemia C0040028 human GSE2006 sample 434	20/426	1.67842e-07	1.51991e-06	4.43556	69.1958	NDUFA13;GPX4;ARPC1B;RPLP1;COX4I1;TALDO1;UQCR11;COX6A1;ATOX1;SOD1;CST3;TUBB3;ABHD17A;AP2S1;SPNS1;LCN2;POLR2E;MCM6;PKIG;CRYM	DiseasePerturbations_GEO UP
amyotrophic lateral sclerosis DOID-332 mouse GSE3343 sample 683	16/275	1.75647e-07	1.5731e-06	5.5023	85.5871	TSC22D4;NDUFA13;NDUFB8;RPLP1;MT2;COX6A1;TUBB4A;CST3;MRPL20;TPPP3;PDLIM2;FKBP8;RPLP2;MBP;APOE;CKB	DiseasePerturbations_GEO UP
HIV encephalitis C0276548 human GSE3489 sample 2	18/351	1.9556e-07	1.7324e-06	4.84045	74.7724	COX8A;KCNJ4;TSC22D4;NDUFB8;RPLP0;RPL13A;PTPRK;RPL8;SOD1;UQCRQ;PALM;ID3;RPLP2;APOE;CKB;PPIB;RPS21;CAMK2G	DiseasePerturbations_GEO UP
Retinal damage C0235272 rat GSE1001 sample 312	16/279	2.13686e-07	1.7422e-06	5.4175	83.2061	COX8A;GPX4;DCTN1;RPS5;RPLP0;NME2;RPL8;EEF2;SOD1;RPS26;BAG6;EIF4H;ID3;RPLP2;PPIB;RPS21	DiseasePerturbations_GEO DOWN
Huntington's disease DOID-12858 mouse GSE3621 sample 704	15/244	2.11997e-07	1.85782e-06	5.81659	89.3818	NDUFA8;NDUFB8;NDUFB11;RPLP1;RPS5;COX4I1;SNHG8;RPL13A;RPL8;COX6A1;UCHL1;PCSK1N;ROMO1;FAU;RPS21	DiseasePerturbations_GEO UP
bipolar disorder DOID-3312 human GSE5392 sample 573	14/212	2.27525e-07	1.97269e-06	6.2603	95.7575	KCNJ4;ARPP21;GPX4;COX4I1;RPLP0;EEF2;NISCH;CST3;PCSK1N;NDUFS7;ABHD17A;CKB;FAU;PFDN5	DiseasePerturbations_GEO UP
Type 1 diabetes mellitus C0011854 mouse GSE1659 sample 346	15/248	2.61444e-07	2.11003e-06	5.71557	86.6311	NDUFA8;ATP6V1G1;NDUFA13;NDUFB8;NDUFB10;NDUFB6;NDUFB11;NDUFA2;TIMM13;UQCR11;UQCRQ;ATP5E;TMEM119;NDUFV1;CSNK1G2	DiseasePerturbations_GEO DOWN
diffuse large B-cell lymphoma DOID-0050745 mouse GSE6136 sample 684	20/440	2.81195e-07	2.24675e-06	4.28461	64.6299	NDUFA13;NDUFB7;NDUFB11;COX4I1;NDUFA2;NME2;TALDO1;FOS;RPL8;COX6A1;EEF2;RPS26;FBL;ATP5E;FAU;TKT;PPIB;JUNB;RPS21;PFDN5	DiseasePerturbations_GEO DOWN
Huntington's disease DOID-12858 mouse GSE3248 sample 725	17/324	3.13088e-07	2.4768e-06	4.94256	74.0237	HDAC5;EGLN2;COX17;STMN3;MT2;FOS;PRDX5;SNRK;JPH3;PITPNM1;PENK;PALM;TMEM119;MBP;CKB;NDUFV1;SPTBN2	DiseasePerturbations_GEO DOWN
head and neck squamous cell carcinoma 5520 human GSE6631 sample 458	18/363	3.20938e-07	2.74866e-06	4.6692	69.814	DDR1;ATP6V0B;GPX4;ARPC1B;RPLP1;RPLP0;NME2;PTPRK;RPL8;EEF2;SOD1;BOLA2;AP2S1;FSCN1;PPIB;RPS21;SNRPB;PLEC	DiseasePerturbations_GEO UP
testis seminoma DOID-5842 human GSE8607 sample 624	13/186	3.23768e-07	2.74866e-06	6.63167	99.0987	RPS5;ARPC1B;RPLP1;RPLP0;NME2;RPL13A;RPL8;EEF2;FBL;RPLP2;APOE;RPS21;SNRPB	DiseasePerturbations_GEO UP
multiple sclerosis DOID-2377 human GSE38010 sample 737	16/290	3.59953e-07	2.81964e-06	5.19708	77.1106	DDR1;RPLP1;MID1IP1;RPLP0;TALDO1;RPL13A;FOS;RPL8;TUBB4A;TPPP3;MAG;EIF4H;RPLP2;MBP;APOE;FAU	DiseasePerturbations_GEO DOWN
Emery-Dreifuss muscular dystrophy DOID-11726 mouse GSE6399 sample 675	15/253	3.37808e-07	2.83828e-06	5.59406	83.3559	NDUFA13;NDUFB10;GPX4;NDUFB6;NDUFB11;RPS5;COX17;LPL;RPL13A;FOS;EEF2;SOD1;RPS26;PIN1;RPS21	DiseasePerturbations_GEO UP
Transplanted Heart Complication C0340529 mouse GSE582 sample 373	16/292	3.94698e-07	3.06179e-06	5.15889	76.0686	GRCC10;ALAS2;NDUFB8;NDUFA7;NDUFB6;NDUFB11;RPLP1;LPL;UQCR11;CST3;UQCRQ;ATP5E;FSCN1;TMEM119;APOE;NDUFV1	DiseasePerturbations_GEO DOWN
Adenoma C0001430 human GSE8514 sample 294	18/371	4.41395e-07	3.35881e-06	4.56151	66.75	RPLP1;RPS5;RPLP0;NDUFC2;RPL13A;FOS;EEF2;TUBB4A;SOD1;GRHPR;PRDX5;PENK;RPLP2;APOE;FAU;PPIB;JUNB;C1QC	DiseasePerturbations_GEO DOWN
osteoarthritis DOID-8398 human GSE16464 sample 751	18/371	4.41395e-07	3.35881e-06	4.56151	66.75	COX8A;NDUFA13;RNASEK;GPX4;COX4I1;SNHG8;RPL13A;EDF1;RPL8;COX6A1;EEF2;PDLIM2;UQCRQ;ATP5E;PENK;AP2S1;TMEM119;PFDN5	DiseasePerturbations_GEO DOWN
Type 1 diabetes mellitus C0011854 mouse GSE4616 sample 363	15/257	4.12818e-07	3.43313e-06	5.50047	80.8583	GRCC10;NDUFA7;NDUFB11;RPLP1;RPS5;RPLP0;COX17;NDUFA2;LPL;MT2;RPL8;EEF2;RPS26;NDUFV1;SNRPB	DiseasePerturbations_GEO UP
Down Syndrome C0013080 mouse GSE1611 sample 105	16/294	4.32454e-07	3.56011e-06	5.12125	75.0457	GRCC10;RAB5C;RPLP1;MT2;RPL8;COX6A1;TUBB4A;ATOX1;SOD1;NISCH;RPS26;NCOR2;ZMIZ2;FASN;TMEM119;CKB	DiseasePerturbations_GEO UP
Anaplasmosis C0002797 human GSE2600 sample 21	18/373	4.77339e-07	3.59806e-06	4.53534	66.0121	COX8A;SF3B5;NDUFA8;NDUFA13;NDUFA7;NDUFB10;DCTN3;SNHG8;TALDO1;COX6A1;EEF2;RPS26;UQCRQ;FAU;PPIB;PFDN5;TOMM6;SNRPB	DiseasePerturbations_GEO DOWN
SCID - Severe combined immunodeficiency C0085110 mouse GSE3414 sample 201	16/299	5.41572e-07	4.04408e-06	5.02948	72.5693	SREBF1;ALAS2;RPLP1;RPS5;MID1IP1;RPLP0;TALDO1;RPL8;1810037I17RIK;ATP5E;FASN;FKBP8;RPLP2;FAU;RPS21;AVPI1	DiseasePerturbations_GEO DOWN
thymic carcinoma DOID-3284 mouse GSE2501 sample 985	15/261	5.02549e-07	4.09577e-06	5.40992	78.4632	RPLP0;RPL13A;MT2;RPL8;NISCH;RPS26;FBL;UQCRQ;ATP5E;FASN;ROMO1;APOE;TKT;NDUFV1;C1QC	DiseasePerturbations_GEO UP
thymic carcinoma DOID-3284 mouse GSE2501 sample 985	17/339	5.89518e-07	4.33797e-06	4.70869	67.5412	TSC22D4;NDUFA7;RNASEK;NDUFB7;RGS14;ARPC1B;RPLP1;RPS5;ABHD8;EDF1;ATOX1;1810037I17RIK;FKBP8;SPNS1;ID3;CSNK1G2;SNRPB	DiseasePerturbations_GEO DOWN
Breast Cancer C0006142 mouse GSE2528 sample 28	16/301	5.91788e-07	4.33797e-06	4.99367	71.6098	NDUFB8;NDUFA7;PCX;LRP1;RPLP1;TALDO1;LPL;COX6A1;SOD1;CST3;UQCRQ;FASN;APOE;TKT;NDUFV1;SNRPB	DiseasePerturbations_GEO DOWN
Macular degeneration C0024437 human GSE1719 sample 46	15/263	5.53706e-07	4.46802e-06	5.36574	77.3023	HDAC5;ATP6V0B;ARPC1B;TALDO1;FOS;SOD1;CDC37;AP2S1;EIF4H;ID3;FAU;TKT;JUNB;PFDN5;SNRPB	DiseasePerturbations_GEO UP
Endometriosis C0014175 human GSE6364 sample 393	17/341	6.39681e-07	4.64641e-06	4.67914	66.7353	ATP6V1G1;ATP6V0B;NDUFA13;RNASEK;GPX4;TALDO1;NDUFC2;RPL8;EEF2;ADRA2A;CST3;PRDX5;ATP5E;ID3;RPLP2;TKT;PPIB	DiseasePerturbations_GEO DOWN
Dermatomyositis C0011633 human GSE1551 sample 130	14/232	6.79109e-07	4.88836e-06	5.68014	80.6722	NDUFA8;NDUFB11;RPLP1;RPS5;COX4I1;LPL;RPL13A;UQCR11;EEF2;NDUFS7;FAU;RPS21;NDUFV1;PFDN5	DiseasePerturbations_GEO DOWN
Nutritional deficiency, NEC C0267975 mouse GSE1776 sample 422	14/230	6.12001e-07	4.89001e-06	5.73332	82.024	COX8A;RPLP1;RPS5;COX4I1;RPLP0;RPL13A;MT2;RPL8;EEF2;RPS26;KRTCAP2;RPLP2;FAU;RPS21	DiseasePerturbations_GEO UP
Nemaline Myopathy C0206157 mouse GSE3384 sample 78	14/234	7.52746e-07	5.37004e-06	5.62793	79.3512	NDUFA13;NDUFA7;RNASEK;NDUFB7;GAA;SGTA;COX6A1;RPS26;KRTCAP2;ROMO1;CKB;NDUFV1;C1QC;PLEC	DiseasePerturbations_GEO DOWN
Nemaline Myopathy C0206157 mouse GSE3384 sample 317	20/466	6.93771e-07	5.48955e-06	4.02941	57.1415	ATP6V1G1;NDUFA7;RNASEK;EGLN2;DCTN1;RPLP0;COX17;NDUFA2;SGTA;LPL;MT2;RPS26;NCOR2;CST3;UQCRQ;TMEM119;ROMO1;NDUFV1;CSNK1G2;PLEC	DiseasePerturbations_GEO UP
cerebral palsy DOID-1969 human GSE11686 sample 913	16/308	8.02483e-07	5.67419e-06	4.87221	68.3842	COX8A;NDUFA8;NDUFA13;NDUFA7;NDUFB11;RPS5;COX4I1;RPLP0;LPL;RPL8;EEF2;TPPP3;NDUFS7;UQCRQ;PKIG;NDUFV1	DiseasePerturbations_GEO DOWN
autism spectrum disorder DOID-0060041 human GSE25507 sample 1023	15/273	8.87026e-07	6.21696e-06	5.15513	71.8387	COX8A;RNASEK;RPLP1;RPS5;SNHG8;NDUFC2;RPL13A;UQCR11;RPS26;UQCRQ;FAU;PPIB;RPS21;CSNK1G2;SNRPB	DiseasePerturbations_GEO DOWN
Meningococcal infection C0025303 human GSE4646 sample 347	18/387	8.1352e-07	6.37518e-06	4.36012	61.1372	RPLP1;RPS5;COX4I1;TALDO1;RPL8;EEF2;SOD1;RPS26;CST3;ATP5E;EIF4H;ID3;RPLP2;FAU;TKT;PPIB;JUNB;RPS21	DiseasePerturbations_GEO UP
Duchenne muscular dystrophy (DMD) C0013264 mouse GSE1025 sample 144	15/276	1.01743e-06	7.06894e-06	5.09509	70.3032	NDUFA8;NDUFA7;NDUFB11;GAA;RPS5;TIMM13;UQCR11;ATOX1;SOD1;RPS26;UQCRQ;TMEM119;CKB;PPIB;NDUFV1	DiseasePerturbations_GEO DOWN
Type 2 diabetes mellitus C0011860 mouse GSE2899 sample 203	15/277	1.06459e-06	7.33279e-06	5.07538	69.8013	NDUFA8;NDUFA13;NDUFB8;RNASEK;NDUFB10;NDUFB11;UQCC2;ARPC1B;CST3;KRTCAP2;ATP5E;TMEM119;CKB;PFDN5;CSNK1G2	DiseasePerturbations_GEO DOWN
Duchenne muscular dystrophy (DMD) C0013264 mouse GSE1472 sample 62	16/315	1.07878e-06	7.36704e-06	4.75643	65.3519	GRCC10;HDAC5;NDUFA8;ATP6V0B;NDUFB8;RNASEK;NDUFB11;RPLP1;RPS5;RPL8;SOD1;RPS26;PRDX5;DDT;FASN;FKBP8	DiseasePerturbations_GEO DOWN
Parkinson's disease DOID-14330 human GSE19587 sample 1080	19/433	9.57564e-07	7.43252e-06	4.11152	56.9811	NDUFA8;NDUFB8;GPX4;RPS5;UQCR11;EDF1;PTPRK;COX6A1;SOD1;CST3;BAG6;TPPP3;PCSK1N;ATP5E;FAU;PPIB;TAC1;RPS21;TOMM6	DiseasePerturbations_GEO UP
Tachycardia C0039231 rat GSE7999 sample 244	18/392	9.78194e-07	7.52102e-06	4.30072	59.5115	NDUFA7;RPLP1;RPS5;RPLP0;NME2;RPL13A;RPL8;EEF2;RPS26;CST3;FBL;PRDX5;PENK;APOE;FAU;PPIB;RPS21;PLEC	DiseasePerturbations_GEO UP
schizophrenia 5419 human GSE12654 sample 465	16/316	1.12458e-06	7.61475e-06	4.74033	64.9336	ABCA2;DCTN1;RPLP1;COX4I1;RPL13A;TUBB4A;UCHL1;MAG;TUBB3;FASN;FSCN1;ID3;CKB;PFDN5;AHDC1;SNRPB	DiseasePerturbations_GEO DOWN
Burn C0006434 rat GSE802 sample 97	16/317	1.17213e-06	7.87003e-06	4.72434	64.5189	COX8A;NDUFA8;MAP2K2;NDUFB6;GAA;RPLP0;UQCR11;RPL8;COX6A1;CST3;DDT;FASN;ID3;APOE;JUNB;RPS21	DiseasePerturbations_GEO DOWN
schizophrenia DOID-5419 human GSE21935 sample 854	16/314	1.03467e-06	7.88087e-06	4.77264	65.7738	RPLP1;RPS5;RPLP0;RPL13A;RPL8;EEF2;NISCH;RPS26;ABHD17A;PALM;POLR2E;RPLP2;MBP;RPS21;PFDN5;C1QC	DiseasePerturbations_GEO UP
HIV - Human immunodeficiency virus infection C0019693 human GSE2504 sample 157	18/396	1.13113e-06	8.53581e-06	4.25433	58.2516	COX8A;ATP6V1G1;NDUFA13;NDUFB11;RPS5;TALDO1;RPL8;COX6A1;FBL;UQCRQ;CLPP;BOLA2;EIF4H;RPLP2;FAU;RPS21;NDUFV1;SNRPB	DiseasePerturbations_GEO UP
systemic lupus erythematosus DOID-9074 human GSE10325 sample 691	13/210	1.28644e-06	8.56557e-06	5.81662	78.8945	ARPC1B;GAA;RPS5;COX4I1;RPLP0;RPL13A;RPL8;EEF2;SOD1;RPS26;FBL;TKT;RPS21	DiseasePerturbations_GEO DOWN
COPD - Chronic obstructive pulmonary disease C0024117 human GSE3320 sample 255	19/442	1.29992e-06	8.58378e-06	4.02217	54.5134	DDR1;COX8A;RPS5;RPLP0;RPL13A;FOS;COX6A1;EEF2;RPS26;CST3;BAG6;TPPP3;TUBB3;UQCRQ;RPLP2;CKB;FAU;PKIG;PFDN5	DiseasePerturbations_GEO DOWN
Down syndrome DOID-14250 human GSE19681 sample 1066	16/320	1.32587e-06	8.68335e-06	4.677	63.2959	COX8A;RCC2;RPS5;COX4I1;NDUFC2;RPL8;COX6A1;CST3;ABHD17A;ATP5E;RPLP2;FAU;RPS21;PFDN5;GIT1;TOMM6	DiseasePerturbations_GEO DOWN
Bone fracture C0016658 rat GSE594 sample 275	17/359	1.29879e-06	9.71117e-06	4.42876	60.0278	ARPC1B;RPS5;RPLP0;NME2;RPL13A;FOS;RPL8;EEF2;RPS26;AP2S1;ID3;APOE;CKB;FAU;PPIB;RPS21;TOMM6	DiseasePerturbations_GEO UP
Leukemia, Acute Megakaryocytic C0023462 mouse GSE2433 sample 95	15/282	1.33116e-06	9.86265e-06	4.97906	67.364	2410006H16RIK;RCC2;RPS5;RPLP0;SNHG8;RPL13A;MT2;RPL8;EEF2;RPS26;RPLP2;FAU;FCGR2B;RPS21;SNRPB	DiseasePerturbations_GEO UP
systemic lupus erythematosus DOID-9074 human GSE10325 sample 692	15/285	1.51851e-06	9.86417e-06	4.92298	65.957	ATP6V1G1;ATP6V0B;GPX4;ARPC1B;RPLP1;RPS5;RPL8;EEF2;SOD1;RPS26;FBL;RPLP2;FAU;RPS21;PFDN5	DiseasePerturbations_GEO DOWN
colorectal cancer DOID-9256 human GSE1323 sample 763	14/249	1.57589e-06	1.01544e-05	5.26466	70.3394	RPLP1;RPS5;RPLP0;RPL13A;SOD1;FBL;LRFN4;TUBB3;UQCRQ;AP2S1;LCN2;PPIB;JUNB;RPS21	DiseasePerturbations_GEO DOWN
myotonic dystrophy type 1 DOID-11722 human GSE7179 sample 1050	17/361	1.40113e-06	1.02876e-05	4.40256	59.3388	COX8A;SF3B5;GPX4;NDUFB11;RCC2;RPS5;COX4I1;TALDO1;UQCR11;FOS;RPL8;MRPL20;TUBB3;UQCRQ;ROMO1;TOMM6;SNRPB	DiseasePerturbations_GEO UP
Sickle Cell Anemia C0002895 human GSE9877 sample 109	18/403	1.45183e-06	1.03919e-05	4.17547	56.1296	NDUFA13;GPX4;RPLP1;RPS5;NDUFC2;COX6A1;ATOX1;SOD1;CST3;FBL;NDUFS7;ABHD17A;CDC37;EIF4H;ID3;TKT;TOMM6;SNRPB	DiseasePerturbations_GEO UP
Hepatitis C infection C0019196 human GSE2067 sample 309	18/403	1.45183e-06	1.03919e-05	4.17547	56.1296	SF3B5;GPX4;COX4I1;RPLP0;TALDO1;NDUFC2;EEF2;SOD1;CST3;BAG6;TUBB3;ATP5E;FSCN1;ID3;APOE;CKB;TKT;RPS21	DiseasePerturbations_GEO UP
schizophrenia 5419 human GSE12654 sample 465	15/284	1.45359e-06	1.03919e-05	4.94153	66.4215	COX8A;KCNJ4;NDUFB8;NDUFA7;NME2;UQCR11;RPL8;EEF2;SOD1;PITPNM1;UQCRQ;PALM;MBP;APOE;FAU	DiseasePerturbations_GEO UP
Senescence C0001792 human GSE1786 sample 114	17/364	1.56835e-06	1.1072e-05	4.36383	58.3247	COX8A;NDUFB11;RPLP1;RPS5;RPL13A;UQCR11;EEF2;SOD1;RPS26;FBL;UQCRQ;ATP5E;EIF4H;RPLP2;FAU;RPS21;PFDN5	DiseasePerturbations_GEO UP
Thymic Carcinoma C0205969 mouse GSE2501 sample 344	14/249	1.57589e-06	1.1072e-05	5.26466	70.3394	RPLP0;RPL13A;MT2;RPL8;RPS26;FBL;UQCRQ;ATP5E;FASN;ROMO1;APOE;TKT;NDUFV1;C1QC	DiseasePerturbations_GEO UP
multiple sclerosis DOID-2377 human GSE38010 sample 738	15/291	1.9658e-06	1.25654e-05	4.81448	63.2604	DDR1;ABCA2;RPLP1;TALDO1;RPL13A;FOS;RPL8;TUBB4A;TPPP3;MAG;EIF4H;RPLP2;MBP;APOE;FAU	DiseasePerturbations_GEO DOWN
ALS (Amyotrophic Lateral Sclerosis) C0002736 human GSE833 sample 283	14/255	2.08542e-06	1.32242e-05	5.13201	67.1295	GPX4;BAD;TNK2;COX6A1;EEF2;SOD1;UCHL1;TUBB3;DDT;FASN;AP2S1;MBP;TKT;RXRG	DiseasePerturbations_GEO DOWN
nephronophthisis DOID-12712 mouse GSE6113 sample 942	15/293	2.13924e-06	1.34587e-05	4.77935	62.3947	COX8A;BCKDHA;NDUFA8;ATP6V1G1;PCX;NDUFB11;COX4I1;NDUFA2;NDUFC2;COX6A1;FAHD2A;SOD1;MRPL20;PRDX5;NDUFV1	DiseasePerturbations_GEO DOWN
autism spectrum disorder DOID-0060041 human GSE25507 sample 1021	14/254	1.99143e-06	1.3872e-05	5.15366	67.6503	COX8A;RNASEK;GPX4;NDUFB11;RPS5;RPLP0;RPL13A;EDF1;COX6A1;RPS26;PRDX5;ABHD17A;BOLA2;PPIB	DiseasePerturbations_GEO UP
hepatitis C DOID-1883 human GSE20948 sample 601	15/294	2.231e-06	1.39263e-05	4.76197	61.9679	RCC2;ARPC1B;TALDO1;NDUFC2;EEF2;SOD1;GRHPR;UCHL1;TUBB3;UQCRQ;ABHD17A;POLR2E;ID3;CKB;PPIB	DiseasePerturbations_GEO DOWN
Infertility due to azoospermia C1321542 mouse GSE3676 sample 151	18/413	2.05365e-06	1.40649e-05	4.06767	53.2697	NDUFA7;EGLN2;GAA;TIMM13;MT2;RPL8;COX6A1;EEF2;RPS26;1700037H04RIK;ZNHIT1;UQCRQ;DDT;ZMIZ2;ADPRH;LCN2;NDUFV1;SNRPB	DiseasePerturbations_GEO UP
Sarcoidosis C0036202 human GSE2657 sample 12	18/413	2.05365e-06	1.40649e-05	4.06767	53.2697	COX8A;NDUFB8;ARPC1B;COX4I1;RPLP0;NME2;FOS;EEF2;SOD1;UQCRQ;FASN;EIF4H;MCM6;PPIB;JUNB;NDUFV1;PFDN5;SNRPB	DiseasePerturbations_GEO UP
testis seminoma DOID-5842 human GSE8607 sample 623	14/255	2.08542e-06	1.41635e-05	5.13201	67.1295	ARPC1B;RPLP1;RPS5;RPLP0;NME2;RPL13A;RPL8;EEF2;SOD1;FBL;RPLP2;APOE;RPS21;SNRPB	DiseasePerturbations_GEO UP
schizophrenia DOID-5419 human GSE17612 sample 852	16/332	2.13948e-06	1.44105e-05	4.49662	58.7031	RPLP1;RPS5;RPLP0;RPL13A;PTPRK;RPL8;NISCH;RPS26;UCHL1;ABHD17A;ID3;RPLP2;FAU;RPS21;SH3GL2;C1QC	DiseasePerturbations_GEO UP
Duchenne muscular dystrophy (DMD) C0013264 mouse GSE1008 sample 298	16/333	2.22426e-06	1.48588e-05	4.4822	58.3407	GRCC10;NDUFA13;RPS5;RPLP0;UQCR11;MT2;RPL8;SLC4A3;EEF2;ATOX1;SOD1;FKBP8;APOE;NDUFV1;C1QC;PLEC	DiseasePerturbations_GEO UP
Oligodendroglioma C0028945 human GSE4290 sample 251	14/257	2.28534e-06	1.51427e-05	5.08925	66.1042	DDR1;COX8A;NDUFA13;RPLP0;LPL;RPL8;EEF2;RPS26;CST3;PCSK1N;UQCRQ;ID3;APOE;RPS21	DiseasePerturbations_GEO UP
amyotrophic lateral sclerosis DOID-332 human GSE833 sample 1006	14/259	2.50221e-06	1.54982e-05	5.04719	65.1003	GPX4;BAD;TNK2;COX6A1;EEF2;SOD1;UCHL1;TUBB3;DDT;FASN;AP2S1;MBP;TKT;RXRG	DiseasePerturbations_GEO DOWN
Bipolar Disorder C0005586 human GSE5388 sample 107	14/259	2.50221e-06	1.64459e-05	5.04719	65.1003	DDR1;NDUFA13;RPLP1;RPS5;RPLP0;RPL13A;COX6A1;RPS26;CST3;ABHD17A;ATP5E;CRYM;PFDN5;CAMK2G	DiseasePerturbations_GEO UP
LGLL - Large granular lymphocytic leukemia C1522378 human GSE10631 sample 47	13/225	2.77189e-06	1.70365e-05	5.40092	69.1101	RPLP1;RPS5;RPLP0;TALDO1;RPL13A;FOS;RPL8;EEF2;RPS26;FBL;MCM6;TKT;JUNB	DiseasePerturbations_GEO DOWN
Asthma, allergic C0155877 mouse GSE2276 sample 348	16/338	2.69526e-06	1.74336e-05	4.41147	56.5727	RPLP1;RPS5;RPLP0;COX17;MT2;COX6A1;ATOX1;RPS26;CST3;UQCRQ;LCN2;CKB;TKT;FCGR2B;SPTBN2;C1QC	DiseasePerturbations_GEO UP
Retinitis Pigmentosa C0035334 mouse GSE128 sample 33	16/338	2.69526e-06	1.74336e-05	4.41147	56.5727	ATP6V1G1;NDUFB6;DCTN1;RPLP1;GAA;RPLP0;MT2;RPL8;SOD1;CST3;CLPP;ROMO1;TKT;PPIB;CRYM;SNRPB	DiseasePerturbations_GEO UP
Essential Hypertension C0085580 rat GSE1675 sample 412	15/301	2.97852e-06	1.81667e-05	4.64375	59.0875	COX8A;ALAS2;NDUFB8;NDUFB10;GPX4;NDUFC2;UQCR11;FOS;COX6A1;CST3;FASN;ID3;RPLP2;FAU;RPS21	DiseasePerturbations_GEO DOWN
Bipolar Disorder C0005586 human GSE5388 sample 107	16/341	3.01914e-06	1.8275e-05	4.37007	55.546	KCNJ4;NDUFA8;ATP6V0B;ARPP21;MID1IP1;COX17;DCTN3;EEF2;SOD1;GRIN2A;TUBB3;UQCRQ;PIN1;MBP;CKB;NDUFV1	DiseasePerturbations_GEO DOWN
Obesity C0028754 human GSE474 sample 236	13/229	3.36548e-06	2.02182e-05	5.29982	66.788	DDR1;COX8A;ATP6V1G1;ATP6V0B;RPS5;RPLP0;LPL;RPL13A;BAG6;UCHL1;RPLP2;FAU;PFDN5	DiseasePerturbations_GEO DOWN
B-cell chronic lymphocytic leukaemia/small lymphocytic lymphoma C0023458 human GSE8835 sample 194	13/228	3.20739e-06	2.05829e-05	5.32474	67.3583	SF3B5;ARPC1B;EDF1;COX6A1;EEF2;SOD1;RPS26;ATP5E;RPLP2;FAU;JUNB;RPS21;TOMM6	DiseasePerturbations_GEO UP
Cancer of prostate C0376358 mouse GSE1413 sample 48	15/306	3.64228e-06	2.17178e-05	4.56279	57.1394	NDUFB8;NDUFB11;RPLP1;RPS5;COX4I1;NME2;RPL13A;MT2;RPL8;SOD1;CST3;PDLIM2;RPLP2;APOE;RPS21	DiseasePerturbations_GEO DOWN
autism spectrum disorder DOID-0060041 human GSE25507 sample 1022	14/266	3.41317e-06	2.17323e-05	4.90523	61.7464	RPLP1;RPS5;COX4I1;RPL13A;RPL8;COX6A1;SOD1;FBL;UQCRQ;ABHD17A;ATP5E;FAU;PFDN5;TOMM6	DiseasePerturbations_GEO UP
Rotavirus infection of children C1442797 human GSE2729 sample 43	15/307	3.78989e-06	2.24305e-05	4.54693	56.7602	RGS14;ARPC1B;RPLP1;RPS5;UQCR11;FOS;RPL8;EEF2;FBL;AP2S1;SPNS1;RPLP2;TKT;RPS21;PFDN5	DiseasePerturbations_GEO DOWN
amyotrophic lateral sclerosis DOID-332 rat GSE7493 sample 682	15/308	3.94283e-06	2.31641e-05	4.53118	56.3843	COX8A;NDUFB11;UQCC2;DCTN1;TNK2;CELF4;STMN3;RPL13A;UQCR11;MRPL53;KRTCAP2;ATP5E;ROMO1;EIF2S3Y;RPS21	DiseasePerturbations_GEO DOWN
Wolfram syndrome UMLS CUI-C0043207 mouse GSE15293 sample 695	16/350	4.21112e-06	2.45597e-05	4.25035	52.6099	ALAS2;ARPP21;SERPINA9;SCAF1;MAG;INF2;SYNDIG1L;PDLIM2;ADORA2A;PENK;PPP1R1B;NOS1AP;MCM6;DRD2;TAC1;RXRG	DiseasePerturbations_GEO DOWN
Neurogenic Muscular Atrophy C0270948 rat GSE2566 sample 396	17/392	4.24872e-06	2.45994e-05	4.03217	49.8735	COX8A;NDUFA7;UQCC2;RPS5;COX4I1;NDUFA2;NME2;LPL;NDUFC2;RPL13A;CST3;MRPL53;FAU;RPS21;NDUFV1;PFDN5;GIT1	DiseasePerturbations_GEO DOWN
facioscapulohumeral muscular dystrophy DOID-11727 human GSE15090 sample 541	18/438	4.66259e-06	2.68015e-05	3.82061	46.9015	NDUFA13;NDUFB10;GPX4;NDUFB6;RPS5;COX4I1;RPL13A;RPL8;EEF2;SOD1;PRDX5;NDUFS7;UQCRQ;EIF4H;FAU;CRYM;RPS21;NDUFV1	DiseasePerturbations_GEO DOWN
Fracture of femur C0015802 rat GSE1371 sample 278	16/351	4.3667e-06	2.75881e-05	4.23744	52.2964	ARPC1B;RPS5;RPLP0;NME2;RPL13A;RPL8;EEF2;RPS26;CST3;EIF4H;APOE;CKB;FAU;PPIB;RPS21;TOMM6	DiseasePerturbations_GEO UP
nemaline myopathy DOID-3191 mouse GSE3384 sample 971	9/107	4.835e-06	2.7594e-05	7.99183	97.817	RPS26;NDUFA13;NDUFB8;TUBB3;RPLP1;UQCR11;FOS;RPL8;ATOX1	DiseasePerturbations_GEO DOWN
Senescence C0001792 human GSE1572 sample 408	15/314	4.982e-06	2.82313e-05	4.43889	54.1974	ATP6V1G1;DCTN1;RPS5;COX4I1;RPLP0;UQCR11;EEF2;NISCH;GRIN2A;UCHL1;TUBB3;NOS1AP;FSCN1;PKIG;PPIB	DiseasePerturbations_GEO DOWN
Schizophrenia C0036341 human GSE12654 sample 226	14/276	5.22589e-06	3.27623e-05	4.71559	57.3504	COX8A;KCNJ4;NDUFB8;NDUFA7;NME2;UQCR11;EEF2;SOD1;PITPNM1;UQCRQ;PALM;MBP;FAU;RPS21	DiseasePerturbations_GEO UP
Parkinson's disease DOID-14330 human GSE19587 sample 496	16/361	6.23063e-06	3.50583e-05	4.1125	49.2926	DDR1;NDUFA13;METRN;COX4I1;RPL13A;RPL8;COX6A1;EEF2;TUBB4A;NISCH;UCHL1;TUBB3;PALM;EIF4H;TAC1;PFDN5	DiseasePerturbations_GEO DOWN
Pulmonary Hypertension C0020542 human GSE703 sample 241	11/173	6.61101e-06	3.69384e-05	5.94227	70.8721	FBL;ATP6V0B;RPS5;RPLP1;RPLP0;RPLP2;RPL13A;PPIB;RPS21;PFDN5;PRRC2A	DiseasePerturbations_GEO DOWN
Dry eye syndrome C0013238 rat GSE844 sample 228	14/280	6.16286e-06	3.83415e-05	4.64372	55.7106	SREBF1;NDUFB8;ARPC1B;RPL13A;RPL8;RPS26;CST3;DDT;ATP5E;LCN2;RPLP2;APOE;FAU;RPS21	DiseasePerturbations_GEO UP
autism spectrum disorder DOID-0060041 human GSE25507 sample 1030	14/283	6.96055e-06	3.83551e-05	4.59123	54.522	COX8A;RNASEK;RPLP1;GAA;MID1IP1;STMN3;FOS;EEF2;RPS26;ABHD17A;FAU;JUNB;CSNK1G2;SNRPB	DiseasePerturbations_GEO DOWN
Osteoarthritis C0029408 human GSE16464 sample 199	14/283	6.96055e-06	3.83551e-05	4.59123	54.522	NDUFA13;RNASEK;GPX4;RPLP0;SNHG8;RPL13A;EDF1;FOS;RPL8;EEF2;SOD1;UQCRQ;ATP5E;TMEM119	DiseasePerturbations_GEO DOWN
Ventricular hypertrophy C0340279 mouse GSE4678 sample 313	15/320	6.25909e-06	3.86451e-05	4.35022	52.1221	BCKDHA;GRCC10;TSC22D4;ATP6V1G1;NDUFA7;NDUFB10;LRP1;ARPC1B;MID1IP1;MT2;SLC4A3;PRDX5;APOE;CKB;PPIB	DiseasePerturbations_GEO UP
myotonic dystrophy type 1 DOID-11722 human GSE7177 sample 1053	14/284	7.2461e-06	3.94891e-05	4.57399	54.1334	NDUFA13;RPS5;RPLP0;SNHG8;RPL13A;RPL8;EEF2;NISCH;RPS26;PENK;EIF4H;FAU;PPIB;PFDN5	DiseasePerturbations_GEO DOWN
Breast Cancer C0006142 human GSE2429 sample 148	15/324	7.2652e-06	3.94891e-05	4.29303	50.7969	DDR1;COX8A;NDUFA13;GPX4;LAMB2;RPLP1;RPS5;EEF2;NISCH;RPS26;CST3;ATP5E;RPLP2;FAU;PFDN5	DiseasePerturbations_GEO DOWN
diabetic retinopathy DOID-8947 mouse GSE12610 sample 911	15/322	6.74545e-06	4.13349e-05	4.32144	51.4538	IGSF8;HDAC5;ATP6V0B;NDUFA13;PLK5;NDUFB7;RPLP0;SNHG8;RPL13A;COX6A1;PCSK1N;ADPRH;CKB;NDUFV1;VAT1L	DiseasePerturbations_GEO UP
Barrett's esophagus DOID-9206 human GSE1420 sample 643	14/286	7.84855e-06	4.23716e-05	4.53989	53.3673	COX8A;NDUFA13;NDUFB11;RPS5;DCTN3;TALDO1;RPL13A;CST3;PDLIM2;UQCRQ;RPLP2;CKB;FAU;PFDN5	DiseasePerturbations_GEO DOWN
Zaire ebolavirus DOID-4325 human GSE31747 sample 497	14/287	8.16611e-06	4.37869e-05	4.52303	52.9896	ATP6V0B;RPLP1;RPS5;COX4I1;RPLP0;NME2;RPL13A;UQCR11;RPL8;UQCRQ;BOLA2;RPLP2;APOE;TKT	DiseasePerturbations_GEO DOWN
amyotrophic lateral sclerosis DOID-332 mouse GSE10953 sample 680	11/177	8.22033e-06	4.37869e-05	5.7979	67.887	NDUFA13;NDUFB8;NDUFB7;GPX4;NDUFS7;NME2;STMN3;NDUFC2;ROMO1;COX6A1;TOMM6	DiseasePerturbations_GEO DOWN
psoriasis DOID-8893 human GSE26952 sample 982	14/285	7.54199e-06	4.58711e-05	4.55688	53.7485	COX8A;SF3B5;NDUFA7;NDUFB7;NDUFB6;COX17;NME2;TPPP3;ZNHIT1;UQCRQ;DDT;ATP5E;PEX6;PFDN5	DiseasePerturbations_GEO UP
Huntington's disease DOID-12858 mouse GSE9038 sample 718	16/371	8.77705e-06	4.64428e-05	3.9946	46.5106	ALAS2;INTS1;FOS;DOHH;SCAF1;SLC6A7;SYNDIG1L;PDLIM2;DDAH2;PPP1R1B;CWC22;PALM;EIF2S3Y;JUNB;SSBP4;LRRC4B	DiseasePerturbations_GEO DOWN
Senescence C0001792 human GSE1572 sample 408	14/286	7.84855e-06	4.7382e-05	4.53989	53.3673	DDR1;KCNJ4;ABCA2;TSC22D4;GPX4;TALDO1;PTPRK;MAG;VGF;MBP;APOE;CKB;JUNB;PLEC	DiseasePerturbations_GEO UP
Niemann-Pick disease Type C DOID-14504 mouse GSE39621 sample 469	14/290	9.18821e-06	4.82985e-05	4.47318	51.8781	STMN3;TALDO1;JOSD2;TUBB4A;ARHGAP33;1810037I17RIK;MAG;INF2;VGF;ATP5E;PENK;MBP;TAC1;CRYM	DiseasePerturbations_GEO DOWN
Huntington's disease DOID-12858 mouse GSE5786 sample 721	16/369	8.2038e-06	4.91625e-05	4.01764	47.0503	ARPP21;UQCC2;RPLP1;RPS5;DCTN3;CELF4;RPL13A;MT2;RPL8;INF2;VGF;PENK;PPP1R1B;CKB;FAU;DRD2	DiseasePerturbations_GEO UP
Spinal Cord Injury C0037929 rat GSE2599 sample 426	13/249	8.36332e-06	4.97526e-05	4.84572	56.6545	SREBF1;ARPC1B;RPS5;RPLP0;RPL13A;RPL8;EEF2;RPS26;CST3;ID3;RPLP2;APOE;FCGR2B	DiseasePerturbations_GEO UP
schizophrenia DOID-5419 human GSE21935 sample 855	13/250	8.73144e-06	5.14626e-05	4.82503	56.2047	ARPP21;RPLP1;RPLP0;RPL13A;FOS;UCHL1;TUBB3;PENK;FAU;RPS21;PFDN5;SH3GL2;C1QC	DiseasePerturbations_GEO UP
sickle cell anemia DOID-10923 human GSE11524 sample 481	16/371	8.77705e-06	5.14626e-05	3.9946	46.5106	ATP6V0B;ALAS2;PRR7;RNASEK;GPX4;ARPC1B;ATOX1;PRDX5;TUBB3;ABHD17A;CLPP;AP2S1;LCN2;POLR2E;CKB;CRYM	DiseasePerturbations_GEO UP
Emery-Dreifuss muscular dystrophy, autosomal recessive form DOID-11726 mouse GSE8000 sample 677	15/334	1.04378e-05	5.45084e-05	4.15631	47.6732	NDUFA8;NDUFA13;ALAS2;NDUFB8;NDUFA7;NDUFB7;NDUFB10;UQCC2;RPLP0;LPL;NDUFC2;UQCR11;UQCRQ;ATP5E;ROMO1	DiseasePerturbations_GEO DOWN
Obesity C0028754 mouse GSE4692 sample 319	14/291	9.55324e-06	5.56135e-05	4.4568	51.5145	COX8A;SREBF1;NDUFA13;PCX;LAMB2;ARPC1B;DCTN3;NME2;EDF1;NISCH;PRDX5;FASN;APOE;TOMM6	DiseasePerturbations_GEO UP
Heart Injury C0018805 mouse GSE4710 sample 75	15/336	1.12031e-05	5.81251e-05	4.12999	47.0791	NDUFA8;NDUFA7;NDUFB7;GPX4;NDUFB11;UQCC2;COX4I1;MID1IP1;NME2;LPL;UQCR11;SLC4A3;SOD1;NDUFS7;NDUFV1	DiseasePerturbations_GEO DOWN
cerebral palsy DOID-1969 human GSE11686 sample 912	12/219	1.15115e-05	5.93399e-05	5.08429	57.8194	COX8A;NDUFA8;NDUFA13;NDUFB11;RPS5;COX4I1;LPL;UQCR11;CKB;RPL8;CRYM;NDUFV1	DiseasePerturbations_GEO DOWN
Senescence C0001792 mouse GSE5078 sample 331	14/293	1.03221e-05	5.96629e-05	4.4244	50.7975	RAB5C;RPLP1;CELF4;MT2;RPL8;COX6A1;TUBB4A;SOD1;RPS26;PRDX5;JPH3;ZMIZ2;C1QC;SNRPB	DiseasePerturbations_GEO UP
colon carcinoma DOID-1520 mouse GSE422 sample 651	17/421	1.08417e-05	6.22254e-05	3.73714	42.7233	SF3B5;ATP6V1G1;NDUFA7;TNK2;RPLP0;DCTN3;TIMM13;NME3;RPL13A;MT2;FOS;SOD1;NISCH;RPS26;1810037I17RIK;TMEM119;ROMO1	DiseasePerturbations_GEO UP
Parkinson's disease DOID-14330 human GSE7621 sample 941	13/258	1.22292e-05	6.26353e-05	4.66556	52.7754	DDR1;ATP6V1G1;RPLP1;RPLP0;FOS;EEF2;RPS26;UCHL1;TUBB3;FSCN1;ID3;MBP;C1QC	DiseasePerturbations_GEO DOWN
atherosclerosis DOID-1936 mouse GSE19286 sample 906	13/259	1.27432e-05	6.48523e-05	4.64636	52.3669	NDUFA13;NDUFB11;COX4I1;NME2;STMN3;LPL;RPL13A;COX6A1;UCHL1;NDUFS7;FASN;APOE;NDUFV1	DiseasePerturbations_GEO DOWN
autism spectrum disorder DOID-0060041 human GSE25507 sample 1028	13/261	1.38286e-05	7.88133e-05	4.60842	51.5625	GPX4;RPS5;COX4I1;STMN3;RPL13A;FOS;RPL8;SOD1;ABHD17A;SPNS1;MBP;JUNB;PFDN5	DiseasePerturbations_GEO UP
Neurofibromatosis DOID-8712 mouse GSE1482 sample 669	14/305	1.6195e-05	8.18973e-05	4.23934	46.7633	NDUFA8;NDUFA7;RPLP0;DCTN3;UQCR11;MT2;GPR37L1;COX6A1;TUBB3;UQCRQ;ZMIZ2;ADPRH;FSCN1;CRYM	DiseasePerturbations_GEO DOWN
Dehydration C0011175 rat GSE3131 sample 60	12/225	1.50933e-05	8.54239e-05	4.93956	54.8353	CST3;VGF;GAA;PENK;AP2S1;NDUFC2;APOE;CKB;EEF2;RPS21;TOMM6;PLEC	DiseasePerturbations_GEO UP
Heart Injury C0018805 mouse GSE4710 sample 75	13/264	1.56091e-05	8.77339e-05	4.55264	50.387	LRP1;RPLP1;RPS5;RPLP0;RPL13A;COX6A1;RPS26;CST3;RPLP2;APOE;FAU;PPIB;C1QC	DiseasePerturbations_GEO UP
Duchenne muscular dystrophy (DMD) C0013264 mouse GSE466 sample 328	13/268	1.82948e-05	9.19343e-05	4.4803	48.8752	NDUFA8;NDUFB8;NDUFA7;RPLP1;NDUFA2;LPL;UQCR11;UQCRQ;ATP5E;ROMO1;NDUFV1;GIT1;PLEC	DiseasePerturbations_GEO DOWN
cerebral palsy DOID-1969 human GSE31243 sample 503	14/309	1.87225e-05	9.29145e-05	4.181	45.5134	ATP6V1G1;NDUFA13;RPLP1;COX17;RPL13A;UQCR11;RPL8;EEF2;SOD1;PDLIM2;UQCRQ;EIF4H;FAU;CRYM	DiseasePerturbations_GEO DOWN
Schizophrenia C0036341 human GSE4036 sample 357	14/309	1.87225e-05	9.29145e-05	4.181	45.5134	COX8A;NDUFB8;RNASEK;RPLP0;RPL13A;COX6A1;SOD1;MRPL53;PRDX5;TUBB3;PENK;CRYM;RPS21;SH3GL2	DiseasePerturbations_GEO DOWN
Alcohol poisoning C0392620 rat GSE3311 sample 288	13/267	1.75879e-05	9.81793e-05	4.49817	49.2473	GPX4;NDUFB6;NDUFB11;UQCC2;NDUFA2;LPL;NDUFC2;FOS;RPS26;KRTCAP2;UQCRQ;ROMO1;DRD2	DiseasePerturbations_GEO UP
diffuse large B-cell lymphoma DOID-0050745 mouse GSE6136 sample 686	16/397	2.02463e-05	9.98568e-05	3.71701	40.1718	NDUFB8;NDUFB7;NDUFB6;COX4I1;COX17;NDUFA2;NME2;COX6A1;EEF2;FBL;EIF4H;MCM6;TKT;PPIB;FCGR2B;TOMM6	DiseasePerturbations_GEO DOWN
Duchenne muscular dystrophy (DMD) C0013264 mouse GSE1472 sample 410	13/271	2.05672e-05	0.000100817	4.42753	47.781	NDUFA8;NDUFB8;NDUFB7;NDUFB10;NDUFB6;NDUFB11;UQCR11;SOD1;UQCRQ;ATP5E;FKBP8;NDUFV1;SNRPB	DiseasePerturbations_GEO DOWN
nemaline myopathy DOID-3191 mouse GSE3384 sample 974	9/128	2.07717e-05	0.000101199	6.57448	70.8855	NDUFA13;1810037I17RIK;NDUFA7;UQCRQ;TMEM119;UQCR11;FOS;ATOX1;SNRPB	DiseasePerturbations_GEO DOWN
Type 1 diabetes mellitus C0011854 mouse GSE1659 sample 346	15/352	1.9353e-05	0.000107297	3.93067	42.6583	GRCC10;RNASEK;EGLN2;NDUFB7;RPLP1;GAA;RPS5;RPLP0;SGTA;LPL;MT2;RPL8;EEF2;SOD1;RPS26	DiseasePerturbations_GEO UP
Sickle Cell Anemia C0002895 human GSE9877 sample 109	11/197	2.24626e-05	0.000108773	5.16919	55.3292	COX8A;UCHL1;TUBB3;ATP5E;RPLP0;AP2S1;RPLP2;RPL13A;RPL8;EEF2;RPS21	DiseasePerturbations_GEO DOWN
autism spectrum disorder DOID-0060041 human GSE25507 sample 1026	13/270	1.97837e-05	0.000108944	4.44498	48.1421	RPLP1;RPS5;RPL13A;FOS;RPL8;EEF2;SOD1;RPS26;ATP5E;SPNS1;RPLP2;RPS21;PFDN5	DiseasePerturbations_GEO UP
ulcerative colitis DOID-8577 human GSE3365 sample 762	13/271	2.05672e-05	0.000112499	4.42753	47.781	COX8A;ALAS2;RPLP1;RPS5;FOS;EEF2;RPS26;CST3;UQCRQ;ATP5E;RPLP2;FAU;JUNB	DiseasePerturbations_GEO UP
Type 2 diabetes mellitus C0011860 mouse GSE2899 sample 299	15/355	2.1363e-05	0.000115384	3.89539	41.8904	RNASEK;CHPF;RPLP1;RPS5;TNK2;COX17;MT2;EDF1;FOS;COX6A1;NISCH;DPM3;UQCRQ;ADPRH;JUNB	DiseasePerturbations_GEO UP
Ulcerative Colitis C0009324 human GSE3365 sample 188	13/272	2.13778e-05	0.000115384	4.41021	47.4236	COX8A;ALAS2;RPLP1;RPS5;FOS;EEF2;RPS26;CST3;UQCRQ;ATP5E;RPLP2;FAU;JUNB	DiseasePerturbations_GEO UP
mytonic dystrophy Type 1 DOID-11722 human GSE7179 sample 1049	14/317	2.4841e-05	0.000119566	4.06893	43.143	SNHG8;TALDO1;RPL13A;EDF1;RPL8;EEF2;SOD1;RPS26;FBL;TUBB3;EIF4H;FAU;RPS21;PFDN5	DiseasePerturbations_GEO DOWN
Type 2 diabetes mellitus C0011860 rat GSE3068 sample 335	14/315	2.31662e-05	0.00012382	4.09639	43.72	GPX4;RPS5;CCDC124;RPLP0;LPL;RPL13A;RPL8;RPS26;CST3;ATP5E;RPLP2;APOE;FAU;RPS21	DiseasePerturbations_GEO UP
lung cancer DOID-1324 mouse GSE14277 sample 615	12/235	2.32447e-05	0.00012382	4.71564	50.3132	ATP6V1G1;GPX4;FASN;RPLP0;NDUFA2;NME2;LCN2;MT2;APOE;FOS;FCGR2B;AVPI1	DiseasePerturbations_GEO UP
Pseudomonas Infection C0033817 human GSE923 sample 170	12/239	2.74488e-05	0.000131327	4.6316	48.6465	RPS26;NDUFB6;UQCRQ;ATP5E;RPLP0;LCN2;PTPRK;FAU;COX6A1;EEF2;RPS21;TOMM6	DiseasePerturbations_GEO DOWN
autism spectrum disorder DOID-0060041 human GSE25507 sample 1027	13/276	2.49071e-05	0.000131814	4.34224	46.0293	NDUFB11;RPS5;FOS;RPL8;SOD1;CST3;BAG6;ABHD17A;BOLA2;RPLP2;PPIB;JUNB;PFDN5	DiseasePerturbations_GEO UP
Obesity C0028754 rat GSE1813 sample 15	14/319	2.66215e-05	0.000139978	4.04184	42.5759	COX8A;GRCC10;NDUFA7;GPX4;NDUFB6;NDUFB11;COX4I1;NME2;UQCR11;COX6A1;SOD1;CST3;ATP5E;FASN	DiseasePerturbations_GEO UP
Dehydration C0011175 rat GSE4130 sample 210	13/278	2.68557e-05	0.000140304	4.30903	45.3526	ATP6V1G1;RNASEK;NDUFB6;NDUFB11;COX4I1;DCTN3;STMN3;NDUFC2;COX6A1;UCHL1;TPPP3;VGF;UQCRQ	DiseasePerturbations_GEO UP
Bone fracture C0016658 rat GSE594 sample 275	12/241	2.97883e-05	0.000141672	4.59067	47.8412	CST3;ALAS2;NDUFB8;NDUFS7;TNK2;COX4I1;LCN2;TALDO1;LPL;UQCR11;MCM6;SOD1	DiseasePerturbations_GEO DOWN
pancreatic non-invasive intraductal papillary-mucinous carcinoma DOID-7685 human GSE19650 sample 609	14/320	2.75531e-05	0.000143031	4.02842	42.296	COX8A;NDUFA13;NDUFB8;RPLP1;COX4I1;RPLP0;EDF1;COX6A1;SOD1;RPS26;UQCRQ;ATP5E;LCN2;RPS21	DiseasePerturbations_GEO UP
Anxiety Disorder C0003469 rat GSE932 sample 111	12/242	3.10218e-05	0.000146665	4.57048	47.4454	CST3;NDUFA8;UCHL1;RGS14;ATP5E;PEX6;AP2S1;PIN1;UQCR11;DLGAP3;COX6A1;CSNK1G2	DiseasePerturbations_GEO DOWN
Retinal damage C0235272 rat GSE1001 sample 312	14/321	2.85133e-05	0.000147078	4.01509	42.0185	SREBF1;NDUFA8;ALAS2;NDUFB6;COX4I1;TALDO1;NDUFC2;RPL13A;COX6A1;CST3;NDUFS7;ATP5E;LCN2;APOE	DiseasePerturbations_GEO UP
Schizophrenia C0036341 human GSE12654 sample 226	14/324	3.15726e-05	0.000148391	3.97562	41.2003	ABCA2;RPLP1;TUBB4A;PRRC2A;UCHL1;MAG;TUBB3;FASN;FSCN1;ID3;CKB;CRYM;PFDN5;SNRPB	DiseasePerturbations_GEO DOWN
systemic lupus erythematosus DOID-9074 human GSE13887 sample 450	12/243	3.22993e-05	0.000149716	4.55046	47.0539	MRPL53;FBL;NDUFA13;RCC2;RPLP1;RPS5;RPLP0;SPNS1;RPLP2;RPL13A;EDF1;EEF2	DiseasePerturbations_GEO DOWN
ALS (Amyotrophic Lateral Sclerosis) C0002736 mouse GSE4390 sample 389	15/368	3.23701e-05	0.000149716	3.74942	38.7625	RAB5C;TNK2;CELF4;SLC4A3;COX6A1;NISCH;UCHL1;TUBB3;UQCRQ;ATP5E;FASN;MBP;CKB;CSNK1G2;SPTBN2	DiseasePerturbations_GEO DOWN
MELAS - Mitochondrial myopathy, encephalopathy, lactic acidosis and stroke-like episodes C0162671 human GSE1462 sample 102	10/169	3.24166e-05	0.000149716	5.48036	56.6496	COX8A;NDUFS7;UQCRQ;RPLP0;RPL13A;NDUFC2;FAU;RPL8;RPS21;PFDN5	DiseasePerturbations_GEO DOWN
Nicotine addiction C0028043 human GSE11208 sample 325	8/103	2.93748e-05	0.000150569	7.29701	76.147	RPS5;RPLP1;RPLP0;RPLP2;RPL13A;FOS;RPL8;RPS21	DiseasePerturbations_GEO UP
relapsing-remitting multiple sclerosis DOID-2378 human GSE16461 sample 879	12/241	2.97883e-05	0.000151734	4.59067	47.8412	FBL;NDUFB11;ATP5E;RPLP1;RPS5;RPLP0;FOS;FAU;RPL8;JUNB;RPS21;PFDN5	DiseasePerturbations_GEO UP
Adenocarcinoma of lung C0152013 human GSE1987 sample 431	13/281	3.00287e-05	0.000152009	4.26014	44.3623	DDR1;COX8A;ATP6V0B;COX4I1;NME3;PTPRK;SOD1;PITPNM1;BOLA2;LCN2;APOE;CKB;SNRPB	DiseasePerturbations_GEO UP
Cushing Syndrome C0010481 human GSE4060 sample 1	13/284	3.35248e-05	0.000153065	4.21233	43.4006	RNASEK;GPX4;RPLP1;RPS5;RPLP0;RPL13A;RPL8;EEF2;SOD1;RPS26;MRPL53;FAU;PPIB	DiseasePerturbations_GEO DOWN
Infection by Yersinia enterocolitica C0238528 mouse GSE2973 sample 127	13/284	3.35248e-05	0.000153065	4.21233	43.4006	GPX4;RPLP1;FOS;RPL8;ATOX1;CST3;ZMIZ2;AP2S1;ID3;RPLP2;APOE;FAU;C1QC	DiseasePerturbations_GEO DOWN
Breast cancer DOID-1612 mouse GSE24594 sample 616	12/242	3.10218e-05	0.000156066	4.57048	47.4454	SREBF1;NDUFA13;NDUFB7;RPLP1;COX4I1;RPLP0;NME2;RPL13A;MT2;ROMO1;APOE;FOS	DiseasePerturbations_GEO UP
Nutritional deficiency, NEC C0267975 mouse GSE1776 sample 422	15/370	3.44466e-05	0.00015638	3.72791	38.3084	NDUFA13;NDUFB8;GPX4;LRP1;UQCC2;UQCR11;NCOR2;CST3;1810037I17RIK;PDLIM2;DDAH2;TMEM119;CKB;PKIG;TOMM6	DiseasePerturbations_GEO DOWN
autism spectrum disorder DOID-0060041 human GSE25507 sample 1031	13/285	3.47666e-05	0.000156941	4.19662	43.0861	RPS5;RPLP0;STMN3;RPL13A;RPL8;EEF2;SOD1;NISCH;FBL;ABHD17A;SPNS1;FAU;RPS21	DiseasePerturbations_GEO DOWN
Teratospermia UMLS CUI-C0919628 human GSE6968 sample 954	14/324	3.15726e-05	0.000157863	3.97562	41.2003	SF3B5;SPHK2;COX4I1;CCDC124;SGTA;ISLR2;NDUFC2;TPPP3;TUBB3;DDT;AP2S1;PIN1;CKB;RPS21	DiseasePerturbations_GEO UP
Dystonia C0393593 human GSE3064 sample 329	13/283	3.23219e-05	0.000160624	4.22814	43.718	DDR1;RPS5;RPLP0;TALDO1;FOS;TPPP3;MAG;ID3;RPLP2;MBP;APOE;FAU;CDH19	DiseasePerturbations_GEO UP
schizophrenia DOID-5419 human GSE21935 sample 854	13/286	3.60484e-05	0.000161813	4.18104	42.7747	COX8A;ATP6V0B;RNASEK;NDUFC2;COX6A1;TUBB4A;CST3;TUBB3;UQCRQ;ATP5E;APOE;CKB;CRYM	DiseasePerturbations_GEO DOWN
colon adenoma DOID-0050912 human GSE4183 sample 550	14/326	3.37689e-05	0.000166798	3.94973	40.6663	GPX4;SNHG8;TALDO1;RPL8;EEF2;SOD1;PRDX5;PPP1R1B;LCN2;ID3;FAU;RPS21;MET;TOMM6	DiseasePerturbations_GEO UP
Simian Acquired Immune Deficiency Syndrome C0080151 human GSE4785 sample 92	12/247	3.78781e-05	0.000169076	4.47209	45.531	RPS26;COX8A;MAP2K2;RPLP0;DCTN3;EIF4H;RPLP2;RPL13A;RPL8;TKT;EEF2;PFDN5	DiseasePerturbations_GEO DOWN
Duchenne muscular dystrophy (DMD) C0013264 mouse GSE1472 sample 62	13/285	3.47666e-05	0.000170691	4.19662	43.0861	NDUFA13;NDUFA7;NDUFB7;CHPF;TIMM13;LPL;MT2;COX6A1;CST3;UQCRQ;ZMIZ2;APOE;NDUFV1	DiseasePerturbations_GEO UP
Huntington's disease DOID-12858 mouse GSE19780 sample 528	14/328	3.60982e-05	0.000176168	3.92417	40.1414	ARPP21;MAP1S;LRRN2;ISLR2;ABCB9;BAIAP2;ARHGAP33;VGF;PITPNM2;PALM;FSCN1;DLGAP3;C1QC;LRRC4B	DiseasePerturbations_GEO UP
anemia DOID-2355 human GSE4619 sample 791	13/290	4.15976e-05	0.000184647	4.11982	41.5585	GPX4;RCC2;RPLP1;RPS5;RPL13A;FOS;FBL;PRDX5;EIF4H;RPLP2;PPIB;PFDN5;SNRPB	DiseasePerturbations_GEO DOWN
Bipolar Disorder 3312 human GSE12654 sample 461	14/334	4.39535e-05	0.000194027	3.84941	38.6187	DDR1;TSC22D4;HDAC5;DCTN1;TNK2;COX4I1;TUBB4A;PRRC2A;MAG;VGF;FASN;FSCN1;ID3;SPTBN2	DiseasePerturbations_GEO DOWN
MS (Multiple Sclerosis) C0026769 human GSE10064 sample 377	14/336	4.68856e-05	0.000205833	3.8251	38.1279	SF3B5;UQCC2;COX4I1;NME2;EEF2;FBL;PRDX5;UQCRQ;CDC37;ATP5E;RPLP2;ROMO1;PPIB;SSBP4	DiseasePerturbations_GEO DOWN
Schizophrenia C0036341 human GSE4036 sample 357	13/291	4.30961e-05	0.000209067	4.10479	41.2616	NDUFA13;GPX4;LPL;EDF1;FOS;RPL8;TUBB4A;NISCH;RPS26;CST3;PPP1R1B;MBP;SPTBN2	DiseasePerturbations_GEO UP
Gamma-hydroxybutyric acidaemia C0268631 mouse GSE2866 sample 205	13/292	4.46414e-05	0.000215283	4.08986	40.9675	ATP6V1G1;RPS5;COX17;DCTN3;CELF4;FOS;COX6A1;ATOX1;SOD1;CST3;KRTCAP2;CKB;PPIB	DiseasePerturbations_GEO UP
Diabetic Retinopathy C0011884 rat GSE1979 sample 189	12/254	4.96673e-05	0.000216853	4.34118	43.0218	NDUFA8;FASN;PENK;ID3;NDUFC2;RPL13A;EDF1;APOE;FOS;EEF2;JUNB;SMIM12	DiseasePerturbations_GEO DOWN
Bacterial Infection C0004623 human GSE3026 sample 322	11/215	5.00684e-05	0.000217416	4.70875	46.6266	TSC22D4;COX4I1;NME2;FKBP8;EIF4H;RPLP2;RPL13A;FAU;RPL8;RPS21;PFDN5	DiseasePerturbations_GEO DOWN
cervical cancer DOID-4362 human GSE9750 sample 617	13/296	5.13162e-05	0.00022163	4.03123	39.8185	NDUFA13;RPS5;RPLP0;RPL13A;UQCR11;FOS;RPL8;RPS26;UQCRQ;LCN2;FAU;JUNB;PFDN5	DiseasePerturbations_GEO DOWN
obesity DOID-9970 mouse GSE55389 sample 612	16/426	4.72959e-05	0.000226742	3.44894	34.3483	SREBF1;METRN;LAMB2;TIMM13;RPL13A;UQCR11;ATOX1;ATP5E;PENK;PPP1R1B;LCN2;RPLP2;B9D2;CRYM;RPS21;C1QC	DiseasePerturbations_GEO UP
Pulmonary Hypertension C0020542 human GSE703 sample 241	16/427	4.86303e-05	0.000231776	3.44037	34.1672	COX8A;ALAS2;GPX4;ARPC1B;COX4I1;NME3;FOS;COX6A1;SOD1;CST3;CLPP;FKBP8;EIF4H;POLR2E;TKT;PLEC	DiseasePerturbations_GEO UP
Asthma, allergic C0155877 human GSE3004 sample 360	11/217	5.44453e-05	0.000233881	4.66256	45.7784	NISCH;UQCRQ;RPLP1;RPLP2;RPL13A;UQCR11;APOE;RPL8;TKT;EEF2;CRYM	DiseasePerturbations_GEO DOWN
multiple sclerosis DOID-2377 human GSE21942 sample 743	13/299	5.68769e-05	0.00024302	3.98833	38.9844	COX8A;RNASEK;ARPC1B;RPLP1;RPS5;RPLP0;RPL13A;CST3;PRDX5;RPLP2;FAU;PPIB;RPS21	DiseasePerturbations_GEO DOWN
Bacterial Infection C0004623 human GSE3026 sample 322	15/385	5.41391e-05	0.000256531	3.57402	35.111	COX8A;ATP6V0B;NDUFB8;ARPC1B;RPLP1;GAA;RPS5;RPLP0;TALDO1;EEF2;CST3;PITPNM1;TKT;PPIB;PLEC	DiseasePerturbations_GEO UP
Intestinal polyposis UMLS CUI-C1257915 mouse GSE6078 sample 952	10/180	5.5368e-05	0.000260838	5.12288	50.2119	RPS26;RPS5;RPLP1;RPLP0;SNHG8;NME2;RPLP2;RPL13A;RPL8;RPS21	DiseasePerturbations_GEO UP
HIV - Human immunodeficiency virus infection C0019693 human GSE6740 sample 419	12/260	6.21792e-05	0.000264262	4.23485	41.0166	COX8A;CST3;FBL;ATP6V1G1;SNRK;RPS5;EIF4H;FAU;RPL8;EEF2;PFDN5;SNRPB	DiseasePerturbations_GEO DOWN
Lung Injury C0273115 human GSE1541 sample 67	14/346	6.4264e-05	0.000271677	3.70798	35.7913	NDUFA8;NDUFB11;COX4I1;RPLP0;TALDO1;SOD1;RPS26;NCOR2;TUBB3;ATP5E;LCN2;RPLP2;PPIB;RPS21	DiseasePerturbations_GEO DOWN
ductal carcinoma in situ DOID-0060074 human GSE21422 sample 605	13/303	6.51021e-05	0.000273771	3.93251	37.9076	GPX4;RPS5;LPL;RPL13A;FOS;EEF2;RPS26;CST3;FBL;RPLP2;FAU;RPS21;PFDN5	DiseasePerturbations_GEO DOWN
Rhinovirus infection C0276447 human GSE11348 sample 324	14/344	6.03967e-05	0.000282893	3.73084	36.2435	COX8A;SF3B5;ATP6V1G1;RNASEK;COX4I1;UQCR11;COX6A1;EEF2;CST3;PRDX5;ABHD17A;LCN2;FAU;RPS21	DiseasePerturbations_GEO UP
Dehydration C0011175 rat GSE3110 sample 443	12/263	6.93968e-05	0.000290304	4.18359	40.0607	RPS26;CST3;RPLP1;RPS5;RPLP0;ID3;RPL13A;UQCR11;CKB;FAU;RPL8;PFDN5	DiseasePerturbations_GEO DOWN
endometrial cancer DOID-1380 human GSE17025 sample 846	13/302	6.29546e-05	0.000291523	3.94632	38.1731	COX8A;NDUFA8;RNASEK;RCC2;TALDO1;RPL8;SOD1;RPS26;PRDX5;LCN2;EIF4H;PPIB;SNRPB	DiseasePerturbations_GEO UP
Carcinoma, Hepatocellular C0019204 mouse GSE2127 sample 300	13/302	6.29546e-05	0.000291523	3.94632	38.1731	GPX4;RPLP1;RPS5;RPLP0;LPL;RPL13A;MT2;ATOX1;SOD1;FKBP8;LCN2;RPLP2;RPS21	DiseasePerturbations_GEO UP
schizophrenia DOID-5419 human GSE21935 sample 855	14/350	7.26519e-05	0.000302338	3.66308	34.9086	COX8A;RNASEK;GPX4;MID1IP1;TALDO1;COX6A1;TUBB4A;SOD1;CST3;PRDX5;UQCRQ;MBP;CKB;TAC1	DiseasePerturbations_GEO DOWN
autism spectrum disorder DOID-0060041 human GSE29691 sample 1038	13/307	7.43416e-05	0.000307766	3.87821	36.8695	ATP6V0B;EDF1;FOS;MRPL54;MRPL53;UQCRQ;DDT;CDC37;CLPP;FKBP8;FAU;PPIB;PFDN5	DiseasePerturbations_GEO DOWN
Thymic Carcinoma C0205969 mouse GSE2501 sample 344	14/351	7.48924e-05	0.000308449	3.65203	34.6923	TSC22D4;RNASEK;RGS14;ARPC1B;RPLP1;ABHD8;EDF1;1810037I17RIK;FKBP8;FSCN1;SPNS1;ID3;CSNK1G2;SNRPB	DiseasePerturbations_GEO DOWN
Sarcoidosis C0036202 human GSE2657 sample 12	10/187	7.62408e-05	0.000312392	4.91852	46.6355	TSC22D4;RGS14;RPS5;RPLP1;SPNS1;RPLP2;RPL13A;FAU;RPL8;PLEC	DiseasePerturbations_GEO DOWN
HIV - Human immunodeficiency virus infection C0019693 human GSE2171 sample 40	11/226	7.84523e-05	0.000319813	4.46532	42.2108	CST3;RPLP1;RPS5;RPLP2;RPL13A;FOS;RPL8;TKT;EEF2;JUNB;RPS21	DiseasePerturbations_GEO DOWN
Down syndrome DOID-14250 human GSE20910 sample 1063	12/267	8.01377e-05	0.000325025	4.11712	38.8317	COX8A;SF3B5;FBL;NDUFB8;RNASEK;DDAH2;ATP5E;FOS;COX6A1;PFDN5;VAT1L;TOMM6	DiseasePerturbations_GEO DOWN
Pulmonary Fibrosis C0034069 mouse GSE2640 sample 406	13/306	7.19311e-05	0.000331208	3.89165	37.1255	LRP1;ARPC1B;NME2;LPL;MT2;EEF2;ATOX1;AP2S1;LCN2;APOE;CKB;FCGR2B;C1QC	DiseasePerturbations_GEO UP
Scleroderma C0011644 human GSE1724 sample 155	10/189	8.33081e-05	0.000336178	4.86307	45.6786	UCHL1;TUBB3;RPS5;RPLP1;RPLP0;NME2;RPL13A;FAU;RPL8;EEF2	DiseasePerturbations_GEO DOWN
COPD - Chronic obstructive pulmonary disease C0024117 human GSE475 sample 343	13/311	8.46981e-05	0.000339063	3.82537	35.8682	RPLP1;RPL13A;FOS;RPL8;EEF2;RPS26;CST3;NDUFS7;CDC37;EIF4H;CRYM;JUNB;RPS21	DiseasePerturbations_GEO DOWN
Huntington's disease DOID-12858 mouse GSE3248 sample 726	11/228	8.48717e-05	0.000339063	4.42372	41.4695	NDUFB8;SNRK;PITPNM1;PENK;FKBP8;TMEM119;STMN3;GPR37L1;CKB;TUBB4A;SPTBN2	DiseasePerturbations_GEO DOWN
Transplanted Heart Complication C0340529 mouse GSE582 sample 373	13/308	7.68218e-05	0.000347832	3.86486	36.6158	RAB5C;RPS5;RPLP0;TALDO1;RPL13A;MT2;FOS;RPL8;COX6A1;RPS26;PRDX5;TUBB3;FCGR2B	DiseasePerturbations_GEO UP
Arrhythmogenic Right Ventricular Cardiomyopathy C0349788 mouse GSE4120 sample 432	13/308	7.68218e-05	0.000347832	3.86486	36.6158	GRCC10;NDUFA8;NDUFB8;RPLP1;RPS5;UQCR11;MT2;FOS;RPL8;EEF2;SOD1;RPS26;PRDX5	DiseasePerturbations_GEO UP
Premature aging C0231341 human GSE10123 sample 55	13/308	7.68218e-05	0.000347832	3.86486	36.6158	COX8A;NDUFB8;NDUFB10;NDUFB11;COX4I1;NDUFC2;RPL8;MRPL53;KRTCAP2;EIF4H;CKB;PKIG;SNRPB	DiseasePerturbations_GEO UP
nemaline myopathy DOID-3191 mouse GSE3384 sample 971	17/493	7.89144e-05	0.000354301	3.16006	29.8535	NDUFA8;ATP6V1G1;RNASEK;EGLN2;DCTN1;RPS5;COX17;NDUFA2;SGTA;LPL;MT2;NCOR2;CDC37;PKIG;NDUFV1;CSNK1G2;PLEC	DiseasePerturbations_GEO UP
schizophrenia DOID-5419 human GSE17612 sample 853	13/309	7.93735e-05	0.000354301	3.85161	36.3644	COX4I1;SNHG8;LPL;EEF2;SOD1;NISCH;CST3;UCHL1;EIF4H;MBP;RPS21;SH3GL2;C1QC	DiseasePerturbations_GEO UP
autism spectrum disorder DOID-0060041 human GSE25507 sample 1024	14/353	7.95547e-05	0.000354301	3.63011	34.2648	NDUFB10;GPX4;ARPC1B;RPS5;COX4I1;MID1IP1;RPLP0;RPL8;RPS26;CST3;FBL;ABHD17A;FAU;PFDN5	DiseasePerturbations_GEO UP
nicotine dependence DOID-0050742 human GSE6264 sample 582	11/230	9.17354e-05	0.00036466	4.38287	40.7458	COX8A;ARHGAP33;NDUFA8;ATP5E;ARPC1B;COX4I1;RPLP0;RPL13A;FAU;RPL8;PPIB	DiseasePerturbations_GEO DOWN
COPD - Chronic obstructive pulmonary disease C0024117 human GSE3212 sample 196	15/400	8.31045e-05	0.000368099	3.43211	32.2461	COX8A;ATP6V0B;MAP2K2;ARPC1B;RPLP1;RPS5;COX4I1;RPLP0;RPL8;EEF2;CDC37;AP2S1;EIF4H;PPIB;SNRPB	DiseasePerturbations_GEO UP
Bipolar Disorder C0005586 human GSE7036 sample 181	13/312	8.74745e-05	0.000385361	3.81238	35.6235	SF3B5;NDUFA13;RPS5;COX4I1;EEF2;RPS26;MRPL53;FBL;ID3;RPLP2;MCM6;RPS21;TOMM6	DiseasePerturbations_GEO UP
nasopharynx carcinoma DOID-9261 human GSE13597 sample 808	14/358	9.23328e-05	0.000404577	3.57642	33.2254	COX8A;GPX4;RPS5;RPLP0;NDUFC2;UQCR11;FOS;COX6A1;SOD1;RPS26;FBL;UQCRQ;FAU;PFDN5	DiseasePerturbations_GEO UP
pancreatic intraductal papillary-mucinous adenoma DOID-7851 human GSE19650 sample 608	13/316	9.93839e-05	0.000433144	3.76128	34.6659	COX8A;RPLP1;COX4I1;RPLP0;EDF1;PTPRK;COX6A1;SOD1;KRTCAP2;ATP5E;LCN2;FAU;RPS21	DiseasePerturbations_GEO UP
nemaline myopathy DOID-3191 mouse GSE3384 sample 975	14/361	0.000100827	0.000437098	3.54496	32.621	ZBTB17;ATP6V1G1;NDUFB8;NDUFA7;RNASEK;EGLN2;DCTN1;RPLP0;COX17;NDUFA2;LPL;NISCH;NCOR2;PLEC	DiseasePerturbations_GEO UP
Carcinoma in situ of small intestine C0686083 mouse GSE422 sample 119	15/408	0.000103506	0.000446334	3.36086	30.8389	SF3B5;ATP6V1G1;NDUFA7;TNK2;RPLP0;DCTN3;TIMM13;RPL13A;MT2;FOS;SOD1;NISCH;1810037I17RIK;TMEM119;ROMO1	DiseasePerturbations_GEO UP
diffuse large B-cell lymphoma DOID-0050745 mouse GSE6136 sample 687	11/234	0.000106896	0.000458527	4.30337	39.3485	CST3;ALAS2;GPX4;RPLP1;RPS5;RPLP0;TALDO1;APOE;FOS;RPL8;PFDN5	DiseasePerturbations_GEO UP
Familial hypophosphataemic rickets C0733682 mouse GSE868 sample 172	12/276	0.000109663	0.000467935	3.97493	36.2438	CST3;SREBF1;ATP6V0B;NDUFA7;RNASEK;RPLP1;TMEM119;ID3;MT2;APOE;EEF2;C1QC	DiseasePerturbations_GEO UP
Hyperlipidemia C0020473 rat GSE3512 sample 38	13/323	0.000123619	0.000488967	3.67502	33.069	NDUFB6;RPLP1;RPS5;COX4I1;RPLP0;RPL8;ATOX1;PRDX5;NDUFS7;UQCRQ;DDT;ID3;RPS21	DiseasePerturbations_GEO DOWN
Nemaline Myopathy C0206157 mouse GSE3384 sample 78	14/366	0.000116499	0.000494513	3.4937	31.6446	ZBTB17;RPLP0;COX17;NDUFA2;TIMM13;LPL;UQCR11;MT2;RPL8;NCOR2;CST3;UQCRQ;TMEM119;CSNK1G2	DiseasePerturbations_GEO UP
cystic fibrosis DOID-1485 human GSE15568 sample 833	12/278	0.000117365	0.000495608	3.94464	35.6998	RPS26;COX8A;CST3;TUBB3;RPS5;LCN2;RPL13A;FOS;FAU;PPIB;JUNB;SOD1	DiseasePerturbations_GEO UP
Obesity C0028754 rat GSE1813 sample 15	12/281	0.000129786	0.000510834	3.90005	34.9039	ALAS2;ARPC1B;RPS5;RPLP0;ID3;RPL13A;APOE;FAU;RPL8;EEF2;RPS21;PRRC2A	DiseasePerturbations_GEO DOWN
Huntington's disease DOID-12858 mouse GSE3621 sample 703	14/371	0.000134243	0.000525785	3.44388	30.7052	ARPP21;MID1IP1;RPLP0;MT2;FOS;PENK;PPP1R1B;CAR11;MBP;APOE;CKB;CRYM;SSBP4;SPTBN2	DiseasePerturbations_GEO DOWN
Neurofibromatosis DOID-8712 mouse GSE1482 sample 667	14/369	0.000126883	0.000533038	3.46364	31.0767	NDUFA13;RNASEK;COX17;CELF4;MT2;GPR37L1;CST3;JPH3;TUBB3;ZMIZ2;MBP;TKT;CRYM;CSNK1G2	DiseasePerturbations_GEO UP
Huntington's disease DOID-12858 human GSE1751 sample 796	13/327	0.000139636	0.000544238	3.62746	32.1991	ALAS2;GPX4;ARPC1B;RPS5;MID1IP1;TALDO1;RPL13A;RPL8;EEF2;BAG6;ATP5E;AP2S1;SNRPB	DiseasePerturbations_GEO DOWN
Schizophrenia C0036341 human GSE12649 sample 261	11/242	0.000143713	0.00055741	4.15264	36.7413	CST3;GRIN2A;GPX4;TUBB3;UQCRQ;MBP;FOS;CKB;CRYM;JUNB;NDUFV1	DiseasePerturbations_GEO DOWN
Familial combined hyperlipidaemia C0020474 human GSE1010 sample 137	14/374	0.000145977	0.000563455	3.41466	30.1585	BCKDHA;NDUFB8;NDUFA7;RPLP1;COX17;TALDO1;EDF1;RPL8;RPS26;UCHL1;UQCRQ;ATP5E;TKT;RPS21	DiseasePerturbations_GEO DOWN
Synovial sarcoma C0039101 mouse GSE6461 sample 22	13/327	0.000139636	0.000583605	3.62746	32.1991	RPLP1;RPS5;RPL13A;RPL8;COX6A1;EEF2;FSCN1;ID3;RPLP2;APOE;FAU;PPIB;RPS21	DiseasePerturbations_GEO UP
Duchenne muscular dystrophy (DMD) C0013264 mouse GSE1026 sample 72	12/287	0.000158043	0.000607098	3.81378	33.3806	NDUFA8;NDUFA13;NDUFB10;NDUFB6;UQCC2;UQCRQ;ATP5E;TMEM119;MBP;ROMO1;ATOX1;SOD1	DiseasePerturbations_GEO DOWN
Alcohol poisoning C0392620 rat GSE3311 sample 288	13/333	0.000167006	0.000638457	3.55835	30.9487	SF3B5;CHPF;RCC2;RPLP0;RPL13A;DOHH;EEF2;SOD1;CST3;DDT;EIF4H;FAU;PPIB	DiseasePerturbations_GEO DOWN
Alzheimer's disease DOID-10652 human GSE36980 sample 519	14/380	0.000172132	0.000651816	3.35764	29.1015	SF3B5;TSHZ3;NDUFB10;NDUFA2;GRIN2A;PITPNM1;LRRTM1;PITPNM2;ASPHD2;DLGAP3;CRYM;MET;CSNK1G2;SPTBN2	DiseasePerturbations_GEO DOWN
endometrial cancer DOID-1380 human GSE17025 sample 847	14/380	0.000172132	0.000651816	3.35764	29.1015	NDUFB8;RPLP1;RPS5;COX4I1;RPLP0;RPL13A;FOS;RPL8;EEF2;NISCH;FAU;PPIB;RPS21;PFDN5	DiseasePerturbations_GEO DOWN
Leukemia, Chronic T-Cell C2363142 human GSE5788 sample 74	12/287	0.000158043	0.000653833	3.81378	33.3806	NISCH;FBL;ATP6V0B;ARPC1B;RPS5;RPLP0;SPNS1;RPL13A;FOS;RPL8;TKT;EEF2	DiseasePerturbations_GEO UP
Cardiac Hypertrophy C1383860 mouse GSE1621 sample 51	12/287	0.000158043	0.000653833	3.81378	33.3806	RPS26;NDUFB8;RNASEK;CHPF;UQCRQ;FSCN1;MT2;CKB;EEF2;ATOX1;C1QC;SNRPB	DiseasePerturbations_GEO UP
Fracture of femur C0015802 rat GSE1371 sample 278	11/249	0.000184287	0.000688061	4.02906	34.6459	NDUFA8;ALAS2;NDUFB8;GPX4;NDUFS7;CDC37;ATP5E;TNK2;COX4I1;UQCR11;MCM6	DiseasePerturbations_GEO DOWN
HIV encephalitis C0276548 human GSE3489 sample 2	11/249	0.000184287	0.000688061	4.02906	34.6459	NISCH;UCHL1;MAG;TUBB3;DCTN1;AP2S1;FSCN1;MBP;FOS;EEF2;CRYM	DiseasePerturbations_GEO DOWN
Erectile dysfunction associated with type 2 diabetes mellitus C1997651 rat GSE2457 sample 186	11/249	0.000184287	0.000688061	4.02906	34.6459	SREBF1;NDUFA7;GPX4;NDUFS7;UQCRQ;ATP5E;NDUFA2;UQCR11;JUNB;MRPL54;SOD1	DiseasePerturbations_GEO DOWN
anemia DOID-2355 human GSE4619 sample 792	12/289	0.000168563	0.000690344	3.78585	32.8923	RPS26;NDUFA8;RPLP0;SNHG8;TALDO1;RPL13A;FAU;RPL8;RPS21;PFDN5;TOMM6;SOD1	DiseasePerturbations_GEO UP
COPD - Chronic obstructive pulmonary disease C0024117 human GSE475 sample 343	12/289	0.000168563	0.000690344	3.78585	32.8923	COX8A;TPPP3;NDUFA13;NDUFB8;GPX4;NDUFB11;UQCRQ;COX4I1;COX17;UQCR11;CKB;FAU	DiseasePerturbations_GEO UP
Macular degeneration C0024437 human GSE1719 sample 46	13/337	0.000187714	0.000697599	3.51369	30.1496	COX8A;LRP1;LAMB2;GAA;RPLP0;RPL13A;EEF2;TUBB4A;TUBB3;FSCN1;PPIB;RPS21;PLEC	DiseasePerturbations_GEO DOWN
Huntington's disease DOID-12858 human GSE24250 sample 671	12/293	0.000191408	0.000708033	3.7312	31.9432	NISCH;RPS26;UQCRQ;RPLP1;RPS5;RPLP0;RPLP2;RPL13A;RPL8;EEF2;RPS21;NDUFV1	DiseasePerturbations_GEO DOWN
systemic lupus erythematosus (SLE) DOID-9074 human GSE36700 sample 512	12/294	0.000197516	0.000727259	3.71778	31.7115	CST3;FBL;RPLP1;RPS5;RPLP0;RPLP2;RPL13A;FAU;RPL8;EEF2;RPS21;TOMM6	DiseasePerturbations_GEO DOWN
Depression 1596 human GSE12654 sample 462	12/291	0.000179675	0.000732177	3.75833	32.4132	DDR1;MAP2K2;RPLP0;PALM;EIF4H;RPLP2;MBP;FOS;PKIG;EEF2;JUNB;SOD1	DiseasePerturbations_GEO UP
Neurogenic Muscular Atrophy C0270948 rat GSE2566 sample 396	10/208	0.000183013	0.000742068	4.39214	37.7986	GRHPR;PRDX5;NDUFB11;UQCRQ;ATP5E;RPLP1;GAA;RXRG;MRPL54;SOD1	DiseasePerturbations_GEO UP
Infantile neuronal ceroid lipofuscinosis C0268281 mouse GSE6678 sample 141	13/338	0.000193224	0.00077959	3.5027	29.9539	GAA;RPLP0;TALDO1;FOS;RPL8;EEF2;RPS26;CST3;RPLP2;APOE;CKB;PPIB;C1QC	DiseasePerturbations_GEO UP
AML - Acute myeloid leukemia C0023467 human GSE2191 sample 112	13/339	0.000198871	0.000794509	3.49178	29.7599	ATP6V0B;RPLP1;RPLP0;LPL;RPL13A;RPL8;EEF2;CST3;FAU;MCM6;TKT;RPS21;PFDN5	DiseasePerturbations_GEO UP
Hypotensive episode C0520541 rat GSE2401 sample 388	13/339	0.000198871	0.000794509	3.49178	29.7599	COX8A;NDUFB11;RPLP1;RPS5;COX4I1;NDUFA2;NME2;TIMM13;COX6A1;SOD1;CST3;DDT;ATP5E	DiseasePerturbations_GEO UP
MDS - Myelodysplastic syndrome C0026986 human GSE4619 sample 206	12/295	0.000203789	0.000805785	3.70445	31.482	RPS26;NDUFA8;NDUFA13;RPLP0;SNHG8;TALDO1;EDF1;FAU;EEF2;RPS21;TOMM6;SOD1	DiseasePerturbations_GEO UP
hepatitis C DOID-1883 human GSE20948 sample 599	12/295	0.000203789	0.000805785	3.70445	31.482	FBL;NDUFA13;RPLP1;RPLP0;SNHG8;RPL13A;APOE;RPL8;PPIB;EEF2;RPS21;SNRPB	DiseasePerturbations_GEO UP
silicosis DOID-10325 rat GSE29110 sample 983	13/340	0.000204659	0.000805785	3.48092	29.5675	ARPC1B;COX4I1;MID1IP1;RPLP0;NME2;TALDO1;LPL;PRDX5;ATP5E;FASN;LCN2;PPIB;FCGR2B	DiseasePerturbations_GEO UP
Parkinson's disease DOID-14330 human GSE7621 sample 941	13/342	0.000216672	0.000848978	3.4594	29.1874	GPX4;RPL8;SOD1;CST3;RPLP2;APOE;CKB;FAU;PPIB;RPS21;PFDN5;CAMK2G;SH3GL2	DiseasePerturbations_GEO UP
Autism DOID-0060041 human GSE25507 sample 464	13/345	0.000235822	0.000864319	3.42762	28.6289	COX8A;RNASEK;RPLP1;MID1IP1;RPLP0;TALDO1;RPL13A;EEF2;RPS26;CST3;FAU;RPS21;SNRPB	DiseasePerturbations_GEO DOWN
familial hypercholesterolemia DOID-13810 human GSE6054 sample 910	12/300	0.000237769	0.000927186	3.6392	30.3663	RPS26;BAG6;GPX4;ABHD17A;ATP5E;ARPC1B;RPLP0;LCN2;TALDO1;RPL13A;FOS;JUNB	DiseasePerturbations_GEO UP
Diabetic Retinopathy C0011884 rat GSE1979 sample 189	13/346	0.000242519	0.000934256	3.41715	28.4458	COX8A;GPX4;DCTN1;GAA;RPLP0;NME2;UQCR11;COX6A1;RPS26;CST3;LCN2;RPLP2;SNRPB	DiseasePerturbations_GEO UP
amyotrophic lateral sclerosis DOID-332 mouse GSE10953 sample 679	16/491	0.000243017	0.000934256	2.96698	24.6923	ATP6V1G1;GAA;COX4I1;COX17;NDUFA2;NME2;NDUFC2;MT2;KRTCAP2;PRDX5;FSCN1;EIF4H;MBP;TKT;TAC1;RPS21	DiseasePerturbations_GEO UP
Parkinson's disease DOID-14330 human GSE19587 sample 740	14/393	0.000243021	0.000934256	3.2403	26.9669	DDR1;NDUFB8;GPX4;TALDO1;UQCR11;EDF1;PTPRK;CST3;BAG6;TPPP3;UQCRQ;ATP5E;FAU;RPS21	DiseasePerturbations_GEO UP
hepatitis C DOID-1883 human GSE20948 sample 597	12/301	0.000245115	0.00093788	3.62642	30.1493	FBL;ATP6V0B;RPS5;RPLP0;POLR2E;TALDO1;RPL13A;RPL8;PPIB;MET;SNRPB;SOD1	DiseasePerturbations_GEO UP
invasive ductal carcinoma DOID-3008 human GSE21422 sample 606	12/304	0.000268321	0.000978942	3.58861	29.5103	RPS26;CST3;FBL;GPX4;RPLP2;LPL;RPL13A;FOS;FAU;EEF2;RPS21;PFDN5	DiseasePerturbations_GEO DOWN
Asthma, allergic C0155877 mouse GSE2276 sample 348	11/262	0.000285642	0.0010374	3.81784	31.1565	NISCH;ALAS2;SNRK;LRP1;DDAH2;GAA;APOE;TUBB4A;AP5S1;GIT1;SOD1	DiseasePerturbations_GEO DOWN
Crohn's disease DOID-8778 human GSE3365 sample 794	11/261	0.000276459	0.00105084	3.8333	31.408	RPS26;CST3;FBL;UQCRQ;ATP5E;RPS5;LCN2;TALDO1;FOS;EEF2;TOMM6	DiseasePerturbations_GEO UP
salivary gland adenoid cystic carcinoma DOID-4866 human GSE36820 sample 511	13/351	0.000278505	0.00105084	3.36573	27.5521	DDR1;RCC2;RPLP1;RPS5;RPLP0;RPL13A;RPL8;EEF2;RPS26;FBL;RPLP2;FAU;SNRPB	DiseasePerturbations_GEO UP
colorectal cancer DOID-9256 human GSE1323 sample 763	13/351	0.000278505	0.00105084	3.36573	27.5521	COX8A;GPX4;SGTA;TIMM13;TALDO1;UQCR11;EEF2;RPS26;ABHD17A;POLR2E;RPLP2;PFDN5;SNRPB	DiseasePerturbations_GEO UP
Streptococcal tonsillitis C0275804 mouse GSE11494 sample 263	14/400	0.000290687	0.00105095	3.18039	25.8987	NDUFA13;NDUFB6;NDUFB11;RPLP0;NME2;TALDO1;RPL8;RPS26;CST3;FBL;RPLP2;ROMO1;PPIB;TOMM6	DiseasePerturbations_GEO DOWN
hepatitis C DOID-1883 human GSE20948 sample 601	12/306	0.000284808	0.00106442	3.56383	29.094	FBL;ATP6V1G1;GPX4;RPS5;SNHG8;RPL13A;EDF1;APOE;RPL8;COX6A1;NDUFV1;SNRPB	DiseasePerturbations_GEO UP
anemia DOID-2355 human GSE4619 sample 793	12/306	0.000284808	0.00106442	3.56383	29.094	NDUFA8;NDUFA13;ARPC1B;SNHG8;TALDO1;EDF1;FAU;EEF2;RPS21;PFDN5;TOMM6;SOD1	DiseasePerturbations_GEO UP
acute myocardial infarction DOID-9408 mouse GSE775 sample 1002	13/352	0.000286225	0.00106442	3.35563	27.3777	NDUFA13;NDUFB8;RPLP1;RPS5;RPLP0;MT2;COX6A1;RPS26;TUBB3;FSCN1;LCN2;JUNB;PLEC	DiseasePerturbations_GEO UP
type 2 diabetes mellitus DOID-9352 human GSE13760 sample 882	10/220	0.000287329	0.00106442	4.13862	33.75	CST3;LRP1;ID3;RPLP2;RPL13A;CKB;RPL8;PPIB;EEF2;RPS21	DiseasePerturbations_GEO UP
Epilepsy C0014544 human GSE7486 sample 417	14/401	0.000298112	0.00106812	3.172	25.7505	COX8A;NDUFA13;RPS5;TALDO1;MRPL53;PRDX5;ZNHIT1;BOLA2;RPLP2;ROMO1;FAU;MCM6;PFDN5;TOMM6	DiseasePerturbations_GEO DOWN
Dental cavity, complex C0399396 human GSE1629 sample 175	14/401	0.000298112	0.00106812	3.172	25.7505	ATP6V1G1;LRP1;LAMB2;RPLP1;RPL13A;PTPRK;RPL8;EEF2;SOD1;RPS26;TUBB3;EIF4H;FAU;PFDN5	DiseasePerturbations_GEO DOWN
nephronophthisis DOID-12712 mouse GSE6113 sample 942	12/307	0.00029337	0.00108188	3.55157	28.8887	RPS26;CST3;ATP6V0B;LRP1;UQCC2;CDC37;ARPC1B;RPS5;AP2S1;APOE;RPS21;C1QC	DiseasePerturbations_GEO UP
Nephroblastoma C0027708 human GSE2712 sample 418	9/181	0.000299215	0.00109847	4.53635	36.8095	RPS26;PCSK1N;UCHL1;RPS5;RPL13A;RPL8;EEF2;RPS21;SNRPB	DiseasePerturbations_GEO UP
cerebral palsy DOID-1969 human GSE31243 sample 877	12/309	0.00031115	0.00110986	3.52729	28.4837	NDUFA8;ATP6V1G1;NDUFA13;UQCRQ;ATP5E;COX17;EIF4H;NDUFC2;RPL13A;UQCR11;RPL8;EEF2	DiseasePerturbations_GEO DOWN
Down syndrome DOID-14250 human GSE19681 sample 1065	11/265	0.000314751	0.00111772	3.77216	30.4177	CST3;ABHD17A;ATP5E;RCC2;COX4I1;RPLP0;SNHG8;FSCN1;RPL13A;GIT1;SNRPB	DiseasePerturbations_GEO DOWN
multiple sclerosis DOID-2377 human GSE38010 sample 738	12/309	0.00031115	0.00113716	3.52729	28.4837	UCHL1;PCSK1N;NDUFB8;JPH3;TUBB3;ATP5E;COX4I1;CELF4;STMN3;COX6A1;CRYM;SH3GL2	DiseasePerturbations_GEO UP
endometrial cancer DOID-1380 human GSE17025 sample 839	12/311	0.000329836	0.0011661	3.50334	28.086	NISCH;RPLP1;RPS5;RPLP0;SNHG8;ID3;RPL13A;FOS;FAU;EEF2;RPS21;PFDN5	DiseasePerturbations_GEO DOWN
Duchenne muscular dystrophy (DMD) C0013264 mouse GSE1008 sample 298	11/267	0.000335514	0.00117829	3.74231	29.9379	KRTCAP2;ATP6V1G1;NDUFB8;ZNHIT1;NDUFB7;UQCRQ;ATP5E;RPLP1;TIMM13;FSCN1;SNRPB	DiseasePerturbations_GEO DOWN
Breast cancer DOID-1612 mouse GSE24594 sample 616	13/358	0.000336494	0.00117829	3.29625	26.3599	GRCC10;NDUFA8;ATP6V1G1;GPX4;RPS5;NDUFA2;TALDO1;LPL;CST3;FASN;LCN2;TKT;SNRPB	DiseasePerturbations_GEO DOWN
amyotrophic lateral sclerosis DOID-332 human GSE833 sample 1007	9/184	0.000337708	0.00117829	4.4579	35.6335	UCHL1;TUBB3;BAD;TNK2;MBP;COX6A1;RXRG;CAMK2G;SOD1	DiseasePerturbations_GEO DOWN
Huntington's disease DOID-12858 mouse GSE3621 sample 702	12/311	0.000329836	0.00120007	3.50334	28.086	NDUFB11;GAA;COX4I1;RPLP0;SNHG8;CELF4;RPLP2;NDUFC2;RPL13A;RPL8;EEF2;RPS21	DiseasePerturbations_GEO UP
schizophrenia DOID-5419 human GSE17612 sample 852	11/268	0.000346321	0.00120309	3.72756	29.7017	COX8A;CST3;TUBB3;PPP1R1B;EIF4H;NDUFC2;CKB;COX6A1;CRYM;TUBB4A;SOD1	DiseasePerturbations_GEO DOWN
cystic fibrosis DOID-1485 mouse GSE769 sample 1058	12/312	0.00033953	0.00122985	3.49148	27.8898	RPS26;KRTCAP2;RNASEK;EGLN2;RPLP1;RPS5;RPLP0;FKBP8;MT2;RPL8;PPIB;EEF2	DiseasePerturbations_GEO UP
nemaline myopathy DOID-3191 mouse GSE3384 sample 972	10/226	0.00035579	0.00123063	4.02243	31.9428	RPS26;NDUFB8;ATP5E;RPLP1;COX17;TIMM13;TMEM119;APOE;SNRPB;SOD1	DiseasePerturbations_GEO DOWN
Chronic phase chronic myelogenous leukemia DOID-8552 human GSE5550 sample 456	11/270	0.000368814	0.00127018	3.69839	29.2366	RPS26;UCHL1;RPLP1;RPS5;RPLP2;RPL13A;FOS;FAU;RPL8;PPIB;RPS21	DiseasePerturbations_GEO DOWN
Acute Lung Injury C0242488 mouse GSE1871 sample 152	10/228	0.000381433	0.001308	3.98512	31.3692	CST3;TPPP3;GPX4;RPLP1;MID1IP1;SNHG8;RPLP2;APOE;CKB;RPS21	DiseasePerturbations_GEO DOWN
Diabetic Nephropathy C0011881 human GSE1009 sample 223	9/186	0.000365576	0.00131834	4.40708	34.8778	COX8A;MAG;SLC6A7;PITPNM1;RPLP1;ID3;RPL13A;APOE;RPL8	DiseasePerturbations_GEO UP
Ventilator-associated lung injury C0340257 mouse GSE2411 sample 355	11/272	0.000392523	0.00134028	3.66968	28.781	TPPP3;ALAS2;LRP1;FASN;MID1IP1;FKBP8;LCN2;ID3;LPL;RPL13A;EEF2	DiseasePerturbations_GEO DOWN
Congestive heart disease C0018802 mouse GSE2236 sample 258	11/272	0.000392523	0.00140928	3.66968	28.781	CST3;GPX4;RPLP1;RPS5;ID3;RPL13A;APOE;FAU;RPL8;COX6A1;PPIB	DiseasePerturbations_GEO UP
Breast Cancer C0006142 rat GSE1872 sample 63	13/367	0.000425927	0.00144815	3.21096	24.921	COX8A;GPX4;COX4I1;TALDO1;LPL;UQCR11;RPL8;EEF2;SOD1;CST3;FASN;ID3;APOE	DiseasePerturbations_GEO DOWN
nemaline myopathy DOID-3191 mouse GSE3384 sample 976	8/150	0.000405444	0.00144929	4.87014	38.0383	NDUFB6;UQCRQ;ATP5E;GAA;TIMM13;CSNK1G2;SNRPB;PLEC	DiseasePerturbations_GEO UP
Cystic Fibrosis C0010674 mouse GSE769 sample 428	11/275	0.00043048	0.00145743	3.62742	28.1147	CST3;GRCC10;NDUFB8;LRP1;UQCRQ;MID1IP1;TMEM119;LPL;APOE;EEF2;C1QC	DiseasePerturbations_GEO DOWN
Cardiac Hypertrophy C1383860 rat GSE1055 sample 354	15/467	0.000440874	0.00148632	2.91326	22.5101	COX8A;RNASEK;GPX4;NDUFB11;RPS5;RPL8;EEF2;NISCH;CST3;KRTCAP2;LCN2;EIF4H;PPIB;NDUFV1;SNRPB	DiseasePerturbations_GEO DOWN
endometrial cancer DOID-1380 human GSE17025 sample 849	12/322	0.000450511	0.00151243	3.37712	26.0211	NISCH;RPLP1;RPS5;COX4I1;RPLP0;ID3;RPL13A;FOS;FAU;EEF2;RPS21;PFDN5	DiseasePerturbations_GEO DOWN
myotonic dystrophy type 1 DOID-11722 human GSE7178 sample 1051	11/279	0.000485838	0.0016242	3.57254	27.2572	RPS26;FBL;TUBB3;RPLP1;RPLP0;SNHG8;RPL13A;RPL8;EEF2;RPS21;SNRPB	DiseasePerturbations_GEO DOWN
esophagus squamous cell carcinoma DOID-3748 human GSE63941 sample 658	9/192	0.000460787	0.00163992	4.26128	32.7376	FBL;RPS5;RCC2;RPLP0;LCN2;RPL13A;RPL8;RPS21;SNRPB	DiseasePerturbations_GEO UP
Senescence C0001792 human GSE1786 sample 114	10/236	0.000499928	0.00166434	3.84248	29.2069	CST3;NDUFA8;NDUFA13;GPX4;NDUFS7;COX4I1;MID1IP1;RPLP0;CRYM;NDUFV1	DiseasePerturbations_GEO DOWN
Parkinson's disease DOID-14330 human GSE6613 sample 788	12/326	0.000502766	0.00166685	3.33341	25.3185	COX8A;CST3;ALAS2;ATP5E;RPLP1;RPS5;RPLP0;EIF4H;NDUFC2;RPL8;RPS21;SOD1	DiseasePerturbations_GEO DOWN
Thrombocytopenia C0040034 mouse GSE2527 sample 253	13/374	0.000508769	0.00167978	3.14756	23.8696	RAB5C;GPX4;ARPC1B;TALDO1;LPL;FOS;ATOX1;CST3;PRDX5;DDT;AP2S1;CKB;PPIB	DiseasePerturbations_GEO DOWN
Hereditary gingival fibromatosis C0399440 human GSE4250 sample 177	11/279	0.000485838	0.00172156	3.57254	27.2572	RPLP1;RPS5;RPLP0;RPLP2;RPL13A;FAU;COX6A1;EEF2;RPS21;PFDN5;SOD1	DiseasePerturbations_GEO UP
Cystic Fibrosis C0010674 mouse GSE769 sample 428	12/325	0.000489246	0.00172613	3.34423	25.4919	RPS26;KRTCAP2;NDUFA7;RNASEK;EGLN2;RPLP1;RPS5;RPLP0;FKBP8;MT2;RPL8;PPIB	DiseasePerturbations_GEO UP
Hypoxia C0242184 mouse GSE3195 sample 70	12/328	0.000530753	0.001738	3.31197	24.9763	RPS26;CST3;NDUFB8;GPX4;RPLP1;RPS5;RPLP0;NME2;ID3;RPLP2;RPL8;COX6A1	DiseasePerturbations_GEO DOWN
Sendai virus infection C1319860 mouse GSE2935 sample 336	12/328	0.000530753	0.001738	3.31197	24.9763	CST3;ATP6V0B;DPM3;NDUFB8;MAP1S;RPLP1;NME3;LPL;APOE;EEF2;CSNK1G2;C1QC	DiseasePerturbations_GEO DOWN
HIV - Human immunodeficiency virus infection C0019693 human GSE2171 sample 40	13/374	0.000508769	0.00178727	3.14756	23.8696	NDUFB8;ARPC1B;RPLP0;NDUFC2;UQCR11;COX6A1;SOD1;RPS26;SPNS1;EIF4H;FAU;PPIB;PFDN5	DiseasePerturbations_GEO UP
Severe acute respiratory syndrome (SARS) C1175175 human GSE1739 sample 165	9/195	0.000515534	0.00180326	4.19191	31.734	COX8A;RAB5C;ATP5E;ARPC1B;LCN2;TALDO1;FAU;TKT;COX6A1	DiseasePerturbations_GEO UP
Hepatitis C infection C0019196 human GSE2067 sample 309	9/197	0.000554915	0.0018097	4.14689	31.088	RPS26;NDUFA13;CHPF;RPS5;RPLP2;RPL13A;UQCR11;RPL8;PPIB	DiseasePerturbations_GEO DOWN
colorectal adenocarcinoma DOID-0050861 mouse GSE31106 sample 1070	12/330	0.000560039	0.00181899	3.2908	24.6399	COX8A;TPPP3;NDUFA13;1810037I17RIK;NDUFB11;ATP5E;COX4I1;UQCR11;MT2;FOS;RPL8;COX6A1	DiseasePerturbations_GEO DOWN
Type 2 diabetes mellitus C0011860 rat GSE6428 sample 291	12/331	0.000575185	0.00186062	3.28032	24.4739	RPS26;FBL;VGF;ARPC1B;MID1IP1;NME2;RPL13A;RPRML;MCM6;RPL8;EEF2;RPS21	DiseasePerturbations_GEO DOWN
RA (rheumatoid arthritis) C0003873 human GSE3592 sample 183	12/332	0.000590674	0.00190302	3.2699	24.3092	LAMB2;RPLP1;COX4I1;RPLP0;EIF4H;ID3;RPLP2;RPL13A;FAU;RPL8;RPS21;C1QC	DiseasePerturbations_GEO DOWN
Diabetic Neuropathy C0011882 mouse GSE11343 sample 7	12/333	0.000606513	0.0019462	3.25954	24.146	CST3;PDLIM2;GPX4;ATP5E;ARPC1B;RPLP1;RPLP0;ID3;APOE;CKB;PPIB;C1QC	DiseasePerturbations_GEO DOWN
Sepsis C0243026 mouse GSE4479 sample 150	11/284	0.000563304	0.00195359	3.50621	26.2324	RPS26;ALAS2;EGLN2;ZMIZ2;RPS5;RPLP0;SNHG8;LCN2;MT2;ROMO1;TOMM6	DiseasePerturbations_GEO UP
Bacterial Infection C0004623 human GSE4748 sample 414	11/284	0.000563304	0.00195359	3.50621	26.2324	CST3;ATP6V0B;TUBB3;RCC2;ARPC1B;FSCN1;TALDO1;FAU;PPIB;EEF2;JUNB	DiseasePerturbations_GEO UP
COPD - Chronic obstructive pulmonary disease C0024117 human GSE3212 sample 196	9/200	0.000618584	0.00197699	4.08113	30.1517	DDR1;CST3;LCN2;RPLP2;RPL13A;APOE;FOS;RPS21;ATOX1	DiseasePerturbations_GEO DOWN
Colitis C0009319 mouse GSE2172 sample 401	12/334	0.000622706	0.00198224	3.24925	23.9842	RPS26;GRCC10;1810037I17RIK;NDUFA7;RNASEK;RPLP0;TALDO1;MT2;RPL8;COX6A1;PPIB;EEF2	DiseasePerturbations_GEO DOWN
cystic fibrosis DOID-1485 mouse GSE769 sample 1058	11/288	0.000632471	0.00199741	3.45487	25.4482	CST3;GRCC10;NDUFB8;LRP1;UQCRQ;FASN;MID1IP1;TMEM119;LPL;APOE;C1QC	DiseasePerturbations_GEO DOWN
cerebral palsy DOID-1969 human GSE31243 sample 878	11/288	0.000632471	0.00199741	3.45487	25.4482	ATP6V1G1;NDUFA7;PDLIM2;RPLP1;COX17;RPL13A;FAU;RPL8;EEF2;CRYM;SOD1	DiseasePerturbations_GEO DOWN
Epilepsy C0014544 human GSE7486 sample 417	9/199	0.000596729	0.00205204	4.10282	30.4595	RNASEK;TUBB3;RPLP0;RPL13A;RPL8;PPIB;EEF2;RPS21;SOD1	DiseasePerturbations_GEO UP
Arthropathy C0022408 human GSE10575 sample 271	9/199	0.000596729	0.00205204	4.10282	30.4595	UCHL1;GPX4;RPLP1;RPS5;RPLP0;ID3;RPL13A;EEF2;ADRA2A	DiseasePerturbations_GEO UP
MELAS - Mitochondrial myopathy, encephalopathy, lactic acidosis and stroke-like episodes C0162671 human GSE1462 sample 102	14/431	0.000610562	0.00209079	2.93924	21.7537	NDUFA8;NDUFA13;RPLP1;RPS5;EDF1;EEF2;RPS26;CST3;BAG6;TPPP3;ATP5E;EIF4H;RPLP2;CRYM	DiseasePerturbations_GEO UP
Streptococcal tonsillitis C0275804 mouse GSE11494 sample 263	9/200	0.000618584	0.0021094	4.08113	30.1517	1810037I17RIK;GPX4;RPLP1;RPS5;COX4I1;LCN2;RPL13A;FOS;COX6A1	DiseasePerturbations_GEO UP
diffuse large B-cell lymphoma DOID-0050745 mouse GSE6136 sample 684	8/160	0.0006223	0.00211323	4.54741	33.5694	ALAS2;RPS5;RPLP1;RPLP0;LCN2;RPLP2;APOE;EIF2S3Y	DiseasePerturbations_GEO UP
Huntington's disease DOID-12858 mouse GSE3248 sample 728	11/288	0.000632471	0.00213886	3.45487	25.4482	NISCH;KRTCAP2;ATP6V0B;SNRK;RPLP0;CELF4;MBP;MT2;APOE;TUBB4A;SNRPB	DiseasePerturbations_GEO UP
Down syndrome DOID-14250 human GSE19681 sample 1065	12/335	0.000639261	0.00215288	3.23903	23.8237	RPS26;FBL;NDUFA8;TUBB3;RPS5;TALDO1;FOS;TKT;PPIB;EEF2;TOMM6;SOD1	DiseasePerturbations_GEO UP
schizophrenia DOID-5419 human GSE17612 sample 853	11/291	0.000688874	0.00216697	3.41733	24.8797	RPS26;COX8A;RNASEK;GPX4;TUBB3;FAU;RPL8;PKIG;COX6A1;CRYM;TUBB4A	DiseasePerturbations_GEO DOWN
Eczema C0013595 human GSE6012 sample 268	8/163	0.000703033	0.0021964	4.45872	32.3708	FASN;RPLP1;RPLP2;RPL13A;APOE;RPL8;RPS21;PFDN5	DiseasePerturbations_GEO DOWN
Premature aging C0231341 human GSE10123 sample 55	11/292	0.00070858	0.0021964	3.40499	24.6939	PRDX5;UCHL1;DDT;RPLP1;ID3;EDF1;ROMO1;VAT1L;ATOX1;PLEC;SOD1	DiseasePerturbations_GEO DOWN
Crohn's disease DOID-8778 human GSE3365 sample 794	12/339	0.000709226	0.0021964	3.19875	23.1952	COX8A;ATP6V1G1;ATP6V0B;ABHD17A;CDC37;RPLP0;EIF4H;NDUFC2;RPL13A;TKT;PPIB;SNRPB	DiseasePerturbations_GEO DOWN
autism spectrum disorder DOID-0060041 human GSE25507 sample 1028	12/339	0.000709226	0.0021964	3.19875	23.1952	RPS26;COX8A;CST3;BAG6;NDUFA13;RNASEK;RAB5C;ATP5E;MID1IP1;POLR2E;TALDO1;EEF2	DiseasePerturbations_GEO DOWN
Insulin Resistance DOID-9352 human GSE36297 sample 581	11/290	0.000669626	0.00224586	3.42976	25.0674	RPS26;CST3;ATP6V1G1;GPX4;ATP5E;RPLP1;RPLP0;RPL13A;FAU;RPS21;SOD1	DiseasePerturbations_GEO UP
glaucoma associated with systemic syndromes DOID-1686 mouse GSE26299 sample 491	12/341	0.000746546	0.00230305	3.17898	22.8888	UCHL1;TPPP3;PCSK1N;SYNDIG1L;TUBB3;UQCC2;ATP5E;TNK2;ISLR2;UQCR11;ROMO1;TUBB4A	DiseasePerturbations_GEO DOWN
osteoarthritis DOID-8398 human GSE16464 sample 752	9/206	0.000763894	0.0023475	3.95562	28.3898	GPX4;PENK;RPLP0;SNHG8;RPL13A;FOS;EEF2;JUNB;RPS21	DiseasePerturbations_GEO DOWN
endometriosis DOID-289 human GSE6364 sample 947	13/391	0.000768516	0.00235266	3.00337	21.5373	ATP6V0B;NDUFA13;RNASEK;GPX4;TALDO1;NDUFC2;EEF2;ADRA2A;CST3;PRDX5;ATP5E;CKB;PPIB	DiseasePerturbations_GEO DOWN
acute myocardial infarction DOID-9408 mouse GSE775 sample 1005	8/166	0.000792003	0.00241531	4.37339	31.2301	GRCC10;NDUFA8;NDUFA7;NDUFB7;UQCRQ;ZMIZ2;LPL;NDUFV1	DiseasePerturbations_GEO DOWN
Peripheral motor neuropathy C0235025 mouse GSE1947 sample 104	12/344	0.000805601	0.00244743	3.14976	22.4387	NDUFA13;1810037I17RIK;NDUFA7;NDUFB7;FASN;MID1IP1;TMEM119;MBP;MT2;GPR37L1;TKT;COX6A1	DiseasePerturbations_GEO DOWN
Type 2 diabetes mellitus C0011860 mouse GSE642 sample 320	11/294	0.000749403	0.00250313	3.38058	24.3275	NDUFA13;NDUFB8;GPX4;FKBP8;FSCN1;UQCR11;MT2;APOE;TKT;COX6A1;EEF2	DiseasePerturbations_GEO UP
Hepatocellular carcinoma DOID-684 human GSE10393 sample 493	11/298	0.000836927	0.00253297	3.33278	23.6154	ATP6V0B;TUBB3;NDUFB11;AP2S1;POLR2E;TALDO1;ID3;EDF1;APOE;EEF2;SNRPB	DiseasePerturbations_GEO DOWN
prostate cancer DOID-10283 human GSE3325 sample 990	11/296	0.000792162	0.00262444	3.35652	23.968	RPS26;ATP6V1G1;PPP1R1B;RPLP0;RPL13A;FOS;RPL8;PPIB;EEF2;JUNB;RPS21	DiseasePerturbations_GEO UP
Asthma, allergic C0155877 mouse GSE3184 sample 436	11/296	0.000792162	0.00262444	3.35652	23.968	RPS26;ARPC1B;RPLP1;NME2;LCN2;MT2;RPL8;TKT;FCGR2B;JUNB;C1QC	DiseasePerturbations_GEO UP
Carcinoma, Hepatocellular C0019204 human GSE6764 sample 407	11/297	0.000814289	0.00268682	3.34461	23.7909	UQCRQ;ATP5E;RPLP1;LCN2;TALDO1;RPLP2;RPL13A;APOE;RPL8;COX6A1;PPIB	DiseasePerturbations_GEO UP
myelodysplastic syndrome DOID-0050908 human GSE19429 sample 749	11/300	0.000883772	0.00290433	3.30938	23.2693	C1QTNF4;ARPC1B;SNHG8;TALDO1;FOS;FAU;EEF2;RPS21;PFDN5;TOMM6;SOD1	DiseasePerturbations_GEO UP
Asthma, allergic C0155877 mouse GSE3184 sample 436	11/304	0.000983995	0.00296684	3.26353	22.5963	CST3;TPPP3;SNRK;PDLIM2;FASN;RPS5;MID1IP1;APOE;FAU;EEF2;SOD1	DiseasePerturbations_GEO DOWN
Hepatocellular carcinoma DOID-684 human GSE10393 sample 493	11/302	0.00093277	0.00305304	3.2863	22.9297	NDUFA7;RPLP1;RPLP0;NDUFA2;RPL13A;FAU;MCM6;COX6A1;RPS21;PFDN5;SOD1	DiseasePerturbations_GEO UP
Nemaline Myopathy C0206157 mouse GSE3384 sample 317	7/134	0.00104966	0.00315294	4.74741	32.5638	NDUFA13;NDUFB8;TUBB3;RPLP1;FOS;ATOX1;SOD1	DiseasePerturbations_GEO DOWN
Type 2 diabetes mellitus C0011860 mouse GSE2899 sample 279	11/308	0.00109344	0.00327213	3.21892	21.9479	NCOR2;SREBF1;NDUFA8;UQCRQ;GAA;FSCN1;BAIAP2;FCGR2B;AP5S1;ATOX1;C1QC	DiseasePerturbations_GEO DOWN
MS (Multiple Sclerosis) C0026769 mouse GSE842 sample 381	10/260	0.00105123	0.00342702	3.46933	23.792	RPS26;RPLP1;RPS5;RPLP0;LCN2;MT2;APOE;RPL8;C1QC;SNRPB	DiseasePerturbations_GEO UP
Psoriasis vulgaris C0263361 human GSE6710 sample 444	11/310	0.00115182	0.00343397	3.19706	21.6326	CST3;FBL;TPPP3;GPX4;RPLP1;RPS5;RPLP0;RPL13A;RPS21;PFDN5;SOD1	DiseasePerturbations_GEO DOWN
Osteolysis C0029435 human GSE755 sample 128	11/307	0.00106518	0.00345866	3.22996	22.1078	FBL;ATP6V0B;GPX4;RPS5;BOLA2;RPLP2;RPL13A;PTPRK;FOS;MCM6;PPIB	DiseasePerturbations_GEO UP
Lung transplant rejection C0729958 human GSE2018 sample 66	10/265	0.00121308	0.00360318	3.40044	22.8325	RPS26;CST3;ATP5E;ARPC1B;GAA;TALDO1;COX6A1;PFDN5;TOMM6;SOD1	DiseasePerturbations_GEO DOWN
Rift Valley fever DOID-1328 mouse GSE18064 sample 875	12/363	0.00127748	0.0037804	2.97635	19.831	2410006H16RIK;GPX4;RPS5;MID1IP1;SNHG8;NME2;ID3;MT2;CKB;COX6A1;EEF2;RPS21	DiseasePerturbations_GEO DOWN
Type 2 diabetes mellitus C0011860 mouse GSE2899 sample 45	10/268	0.00131959	0.00389059	3.36038	22.2808	CST3;SREBF1;GPX4;TUBB3;FASN;GAA;TIMM13;UQCR11;TKT;ATOX1	DiseasePerturbations_GEO DOWN
amyotrophic lateral sclerosis DOID-332 mouse GSE3343 sample 685	7/138	0.00124565	0.00402859	4.60151	30.7754	RPS26;RPS5;FKBP8;MBP;APOE;COX6A1;RPL8	DiseasePerturbations_GEO UP
familial hypercholesterolemia DOID-13810 human GSE6088 sample 908	11/317	0.00137676	0.00404423	3.1228	20.5731	FBL;SNRK;RNASEK;GPX4;RPS5;COX4I1;RPLP2;FAU;RPL8;PFDN5;SOD1	DiseasePerturbations_GEO DOWN
Carcinoma, Hepatocellular C0019204 mouse GSE4612 sample 315	12/363	0.00127748	0.00411521	2.97635	19.831	CST3;GPX4;FASN;RPLP1;RPLP0;LCN2;RPLP2;LPL;RPL13A;APOE;ATOX1;C1QC	DiseasePerturbations_GEO UP
endometriosis DOID-289 human GSE6364 sample 945	11/318	0.00141165	0.00413154	3.11247	20.4271	CST3;RPLP0;SNHG8;POLR2E;ID3;RPLP2;CKB;RPL8;TKT;PPIB;EEF2	DiseasePerturbations_GEO DOWN
endometriosis DOID-289 human GSE23339 sample 883	11/315	0.00130909	0.00418397	3.14366	20.869	UCHL1;RPS5;FSCN1;ID3;RPLP2;APOE;FOS;TKT;EEF2;C1QC;SOD1	DiseasePerturbations_GEO UP
glioblastoma UMLS CUI-C0017636 human GSE15824 sample 862	11/315	0.00130909	0.00418397	3.14366	20.869	CST3;NDUFA8;RPLP0;TALDO1;LPL;RPL13A;APOE;FOS;PPIB;RPS21;SOD1	DiseasePerturbations_GEO UP
Uterine leiomyoma C0042133 human GSE593 sample 16	10/270	0.00139473	0.00444027	3.33419	21.9225	RPS26;UQCRQ;ATP5E;RPLP1;RPS5;RPLP0;UQCR11;PPIB;RPS21;PFDN5	DiseasePerturbations_GEO UP
Adenocarcinoma of esophagus C0279628 human GSE1420 sample 164	11/318	0.00141165	0.00447664	3.11247	20.4271	RPS26;ATP5E;ARPC1B;RPLP1;BOLA2;RPLP0;LCN2;PTPRK;FOS;PPIB;TOMM6	DiseasePerturbations_GEO UP
Spinal Muscular Atrophy C0026847 mouse GSE10599 sample 235	12/368	0.001434	0.00452989	2.93379	19.2084	GRIN2A;UCHL1;TPPP3;MAG;PCSK1N;JPH3;TUBB3;STMN3;MBP;GPR37L1;TAC1;VAT1L	DiseasePerturbations_GEO UP
cystic fibrosis DOID-1485 human GSE15568 sample 833	11/322	0.00155857	0.00454487	3.0718	19.8561	UQCRQ;ATP5E;RPLP1;COX4I1;UQCR11;CKB;RPL8;EEF2;RPS21;PFDN5;TOMM6	DiseasePerturbations_GEO DOWN
Polycystic Ovary Syndrome C0032460 human GSE5090 sample 308	10/275	0.00159794	0.00462593	3.27044	21.0585	RPS26;FASN;RPLP1;RPS5;RPLP0;ID3;RPL13A;RPL8;PPIB;PFDN5	DiseasePerturbations_GEO DOWN
polycystic ovary syndrome DOID-11612 human GSE8157 sample 880	10/275	0.00159794	0.00462593	3.27044	21.0585	RPS26;NDUFA8;NDUFA13;NDUFB11;SNHG8;TALDO1;LPL;RPL13A;ROMO1;RPS21	DiseasePerturbations_GEO DOWN
anaplastic thyroid carcinoma UMLS CUI-C0238461 human GSE65144 sample 654	10/276	0.00164133	0.00470359	3.25798	20.891	PRDX5;NDUFA13;SNHG8;ID3;NDUFC2;EDF1;FOS;FAU;PFDN5;SOD1	DiseasePerturbations_GEO DOWN
myelodysplastic syndrome DOID-0050908 human GSE19429 sample 747	10/276	0.00164133	0.00470359	3.25798	20.891	RPS26;FBL;PRDX5;ATP6V0B;GPX4;RPS5;EIF4H;RPL13A;RPL8;SNRPB	DiseasePerturbations_GEO DOWN
Sepsis C0243026 rat GSE1781 sample 314	12/374	0.00164243	0.00470359	2.88428	18.4928	RPS26;GRHPR;PRDX5;RNASEK;DDT;CDC37;COX4I1;APOE;FAU;RPL8;EEF2;SOD1	DiseasePerturbations_GEO DOWN
Generalized seizures C0234533 mouse GSE6614 sample 169	11/321	0.00152071	0.00478526	3.08187	19.9969	NDUFA13;NDUFB8;GPX4;NDUFB6;TUBB3;GPR37L1;FOS;TKT;JUNB;TUBB4A;SNRPB	DiseasePerturbations_GEO UP
esophagus adenocarcinoma DOID-4914 human GSE1420 sample 644	11/322	0.00155857	0.00488551	3.0718	19.8561	RPS26;ATP5E;ARPC1B;RPLP1;BOLA2;RPLP0;LCN2;PTPRK;FOS;PPIB;TOMM6	DiseasePerturbations_GEO UP
Adenoma C0001430 human GSE8514 sample 294	9/229	0.00160004	0.00497722	3.53791	22.7761	RNASEK;RAB5C;UQCRQ;ATP5E;UQCR11;RPL8;COX6A1;RPS21;PFDN5	DiseasePerturbations_GEO UP
Huntington's disease DOID-12858 mouse GSE3621 sample 703	9/229	0.00160004	0.00497722	3.53791	22.7761	NDUFA13;NDUFS7;NDUFB11;GAA;RPS5;STMN3;RPLP2;NDUFC2;COX6A1	DiseasePerturbations_GEO UP
familial hypercholesterolemia DOID-13810 human GSE6088 sample 907	10/279	0.00177726	0.00507155	3.22115	20.3985	CST3;KRTCAP2;RNASEK;RPLP1;COX4I1;RPLP2;FAU;RPL8;PPIB;PFDN5	DiseasePerturbations_GEO DOWN
Nemaline Myopathy C0206157 mouse GSE3384 sample 160	10/276	0.00164133	0.00508625	3.25798	20.891	NCOR2;ZBTB17;ATP6V1G1;NDUFA7;RNASEK;EGLN2;DCTN1;RPLP0;LPL;PLEC	DiseasePerturbations_GEO UP
Neurological pain disorder C0423704 rat GSE18803 sample 212	8/189	0.00181637	0.0051647	3.81318	24.0646	C1QTNF4;ALAS2;CHPF;PPP1R1B;PITPNM2;NOS1AP;CAR11;SLC4A3	DiseasePerturbations_GEO DOWN
Huntington's disease DOID-12858 human GSE24250 sample 466	12/379	0.00183464	0.00519814	2.84425	17.9213	NISCH;RPS26;ATP5E;RPLP1;RPS5;RPLP0;RPLP2;RPL8;EEF2;RPS21;GIT1;SNRPB	DiseasePerturbations_GEO DOWN
ulcerative colitis DOID-8577 human GSE3365 sample 762	11/329	0.00184572	0.00521105	3.0031	18.9042	NISCH;ATP6V1G1;ATP6V0B;ABHD17A;BOLA2;EIF4H;RPL13A;RPL8;TKT;PFDN5;SNRPB	DiseasePerturbations_GEO DOWN
pancreatic cancer DOID-1793 human GSE16515 sample 475	12/376	0.00171722	0.00530126	2.86813	18.2615	RPS26;FBL;ATP5E;ARPC1B;RPLP1;RPLP0;LCN2;TALDO1;RPL13A;RPL8;RPS21;SOD1	DiseasePerturbations_GEO UP
endometrial cancer DOID-1380 human GSE17025 sample 848	11/327	0.00175959	0.00539124	3.02242	19.1702	FBL;NDUFA8;DDAH2;RCC2;LCN2;EIF4H;NDUFC2;RPL8;COX6A1;TOMM6;SNRPB	DiseasePerturbations_GEO UP
myelodysplastic syndrome DOID-0050908 human GSE19429 sample 748	11/327	0.00175959	0.00539124	3.02242	19.1702	ARPC1B;RPS5;COX4I1;SNHG8;TALDO1;EDF1;EEF2;RPS21;PFDN5;TOMM6;SOD1	DiseasePerturbations_GEO UP
Kidney disorder associated with type 2 diabetes mellitus C1720457 mouse GSE2557 sample 8	10/282	0.00192217	0.00540781	3.18513	19.9208	KRTCAP2;2410006H16RIK;RPS5;RPLP0;SNHG8;NME2;LCN2;RPL8;PPIB;AVPI1	DiseasePerturbations_GEO DOWN
Carcinoma, Hepatocellular C0019204 mouse GSE4612 sample 315	9/237	0.00202223	0.00566933	3.41238	21.1689	RPS26;SREBF1;GRHPR;NDUFB10;NDUFB11;DDT;FAU;RPL8;SOD1	DiseasePerturbations_GEO DOWN
pancreatitis DOID-4989 mouse GSE3644 sample 513	9/238	0.00208072	0.00581292	3.3973	20.9785	RPLP1;RPS5;RPLP0;RPLP2;RPL13A;FAU;COX6A1;PPIB;TOMM6	DiseasePerturbations_GEO DOWN
cerebral palsy DOID-1969 human GSE11686 sample 912	12/381	0.00191653	0.00585007	2.82854	17.6989	RPS26;RPLP1;RPLP0;COX17;EIF4H;RPLP2;RPL13A;FOS;FAU;EEF2;RPS21;PFDN5	DiseasePerturbations_GEO UP
polycystic ovary syndrome DOID-11612 human GSE34526 sample 797	12/382	0.00195858	0.0059536	2.82075	17.5889	CST3;ATP6V0B;ARPC1B;RPLP1;RPS5;RPLP0;TALDO1;RPL13A;FOS;RPL8;EEF2;JUNB	DiseasePerturbations_GEO UP
ovarian cancer DOID-2394 human GSE14407 sample 611	9/236	0.00196505	0.0059536	3.42759	21.3615	KRTCAP2;NDUFB8;UQCRQ;RPLP1;ROMO1;FAU;RPL8;RPS21;TOMM6	DiseasePerturbations_GEO UP
familial hypercholesterolemia DOID-13810 human GSE6088 sample 908	10/283	0.00197255	0.00595417	3.1733	19.7647	RPS26;NDUFB8;ATP5E;RPLP0;TALDO1;FOS;JUNB;RPS21;TOMM6;SNRPB	DiseasePerturbations_GEO UP
nemaline myopathy DOID-3191 mouse GSE3384 sample 975	9/239	0.00214056	0.00595925	3.38236	20.7903	ALAS2;ATP5E;RPLP1;FKBP8;TMEM119;UQCR11;APOE;SNRPB;SOD1	DiseasePerturbations_GEO DOWN
Cerebral Infarction C0007785 mouse GSE63 sample 262	8/192	0.00200444	0.00602812	3.75043	23.2991	CST3;TIMM13;MT2;FOS;CKB;COX6A1;JUNB;ATOX1	DiseasePerturbations_GEO UP
juvenile dermatomyositis UMLS CUI-C0263666 human GSE11971 sample 771	14/489	0.00201938	0.00605071	2.57261	15.963	COX8A;ATP6V1G1;NDUFA13;NDUFB8;COX4I1;RPLP0;LPL;NDUFC2;UQCR11;RPL8;EEF2;CST3;UQCRQ;EIF4H	DiseasePerturbations_GEO UP
Down syndrome DOID-14250 human GSE20910 sample 1063	11/333	0.00202829	0.00605516	2.96519	18.3858	RPS26;ALAS2;RCC2;RPLP1;RPS5;RPLP0;ID3;RPL13A;PPIB;RPS21;SOD1	DiseasePerturbations_GEO UP
systemic lupus erythematosus DOID-9074 human GSE10325 sample 693	9/240	0.00220176	0.00610834	3.36754	20.6043	RPS26;FBL;ARPC1B;RPS5;RPL13A;FAU;PFDN5;CSNK1G2;SOD1	DiseasePerturbations_GEO DOWN
myotonic dystrophy type 1 DOID-11722 human GSE7177 sample 1054	11/337	0.00222531	0.00615232	2.9282	17.885	RPS26;FBL;SNHG8;EIF4H;ID3;RPL13A;RPL8;PPIB;EEF2;PFDN5;SOD1	DiseasePerturbations_GEO DOWN
Bipolar Disorder C0005586 human GSE7036 sample 181	10/288	0.00224064	0.00617336	3.11543	19.0072	GRHPR;TUBB3;UQCRQ;ATP5E;ARPC1B;BOLA2;FSCN1;EIF4H;NDUFV1;SOD1	DiseasePerturbations_GEO DOWN
autism spectrum disorder DOID-0060041 human GSE28521 sample 1039	11/336	0.00217466	0.00646841	2.93736	18.0086	ARPP21;BTBD17;METRN;DDAH2;ADPRH;TIMM13;RPRML;JOSD2;TKT;SSBP4;C1QC	DiseasePerturbations_GEO UP
Osteolysis C0029435 human GSE755 sample 128	10/293	0.00253733	0.00696676	3.0596	18.2861	COX8A;DDT;RPLP1;RPLP0;NME2;ID3;ABCB9;RPL8;TKT;RPS21	DiseasePerturbations_GEO DOWN
oligodendroglioma DOID-3181 human GSE15824 sample 859	10/290	0.00235577	0.00698164	3.09286	18.7145	RPS26;RPS5;RPLP0;ID3;LPL;RPL13A;RPL8;PPIB;EEF2;RPS21	DiseasePerturbations_GEO UP
Huntington's disease DOID-12858 mouse GSE19780 sample 527	10/294	0.00260028	0.00709088	3.04867	18.1461	PLK5;PDLIM2;DDAH2;PPP1R1B;CWC22;PALM;FOS;EIF2S3Y;JUNB;SSBP4	DiseasePerturbations_GEO DOWN
Pulmonary Fibrosis C0034069 mouse GSE2640 sample 406	10/294	0.00260028	0.00709088	3.04867	18.1461	TPPP3;1810037I17RIK;ALAS2;NDUFB11;RPLP1;RPS5;MID1IP1;RPL13A;RPS21;SOD1	DiseasePerturbations_GEO DOWN
atherosclerosis DOID-1936 mouse GSE19286 sample 906	11/341	0.0024376	0.00719798	2.89211	17.4011	1700037H04RIK;PRDX5;NDUFB6;RPLP1;MID1IP1;NDUFA2;SGTA;TALDO1;UQCR11;C1QC;TOMM6	DiseasePerturbations_GEO UP
endometrial cancer DOID-1380 human GSE17025 sample 843	10/295	0.00266449	0.00724124	3.03782	18.0074	NISCH;RPLP1;RPS5;RPLP0;ID3;RPL13A;FOS;FAU;RPS21;PFDN5	DiseasePerturbations_GEO DOWN
Type 2 diabetes mellitus C0011860 mouse GSE2899 sample 279	10/292	0.0024756	0.00728381	3.07061	18.4275	RPS26;CST3;PRDX5;1810037I17RIK;RPS5;LCN2;BMYC;MT2;ROMO1;RPL8	DiseasePerturbations_GEO UP
hepatitis C DOID-1883 human GSE20948 sample 600	10/293	0.00253733	0.00743857	3.0596	18.2861	FBL;RPS5;RPLP0;SNHG8;RPL13A;EDF1;APOE;RPL8;NDUFV1;SNRPB	DiseasePerturbations_GEO UP
Appendicitis C0003615 human GSE9579 sample 98	10/298	0.00286475	0.00773289	3.00571	17.5993	COX8A;CST3;TUBB3;RPLP1;ID3;UQCR11;FOS;CKB;EEF2;JUNB	DiseasePerturbations_GEO DOWN
renal cell carcinoma DOID-4450 human GSE38424 sample 664	10/298	0.00286475	0.00773289	3.00571	17.5993	BCKDHA;NDUFA8;UCHL1;NDUFB7;NDUFB10;NDUFB6;SPHK2;AP2S1;HDDC3;ATOX1	DiseasePerturbations_GEO DOWN
Malignant mesothelioma of pleura C0812413 human GSE2549 sample 118	12/397	0.00268582	0.00783558	2.70875	16.0352	DDR1;UCHL1;UQCRQ;RPLP1;RPS5;RPLP0;RPL13A;FOS;RPL8;PPIB;EEF2;RPS21	DiseasePerturbations_GEO UP
COPD - Chronic obstructive pulmonary disease C0024117 human GSE3320 sample 255	7/158	0.00269198	0.00783558	3.98797	23.5988	ATP6V1G1;UCHL1;RPLP1;LCN2;TALDO1;RPL8;TKT	DiseasePerturbations_GEO UP
hepatitis C DOID-1883 human GSE20948 sample 597	10/299	0.00293411	0.00789346	2.99516	17.4658	RPS26;COX8A;GPX4;RPLP1;RPLP2;EDF1;FAU;COX6A1;JUNB;RPS21	DiseasePerturbations_GEO DOWN
invasive ductal carcinoma DOID-3008 human GSE21422 sample 606	10/296	0.00272995	0.00791784	3.02704	17.87	DDR1;COX8A;ATP6V0B;PPP1R1B;RPLP0;COX6A1;PPIB;TOMM6;SNRPB;SOD1	DiseasePerturbations_GEO UP
ductal carcinoma in situ DOID-0060074 human GSE21422 sample 605	10/297	0.0027967	0.00808266	3.01634	17.734	DDR1;COX8A;KRTCAP2;UQCRQ;ATP5E;ARPC1B;PPP1R1B;LCN2;PPIB;SOD1	DiseasePerturbations_GEO UP
Epilepsy DOID-1826 rat GSE2880 sample 804	8/203	0.0028288	0.00811786	3.53688	20.7541	CST3;UCHL1;COX4I1;RPL13A;NDUFC2;MBP;COX6A1;RPS21	DiseasePerturbations_GEO UP
diffuse large B-cell lymphoma DOID-0050745 mouse GSE6136 sample 686	8/203	0.0028288	0.00811786	3.53688	20.7541	CST3;ALAS2;RPS5;RPLP0;LCN2;RPL13A;APOE;FOS	DiseasePerturbations_GEO UP
Type 1 diabetes mellitus C0011854 mouse GSE2254 sample 204	12/400	0.00285479	0.0081637	2.68739	15.7448	RPS26;KRTCAP2;ATP6V1G1;PRDX5;ATP6V0B;RNASEK;UQCRQ;GAA;APOE;EEF2;NDUFV1;C1QC	DiseasePerturbations_GEO UP
prolactinoma DOID-5394 human GSE36314 sample 636	7/160	0.00288756	0.00822853	3.93544	23.0119	CHPF;VGF;CDC37;PENK;LPL;SLC4A3;EEF2	DiseasePerturbations_GEO UP
Inflammatory papules (Acne) 6543 human GSE6475 sample 459	10/301	0.00307687	0.00824973	2.97426	17.2027	CST3;GPX4;RPLP0;NDUFC2;RPL13A;PTPRK;RPL8;EEF2;PFDN5;SOD1	DiseasePerturbations_GEO DOWN
Atherosclerosis C0004153 mouse GSE363 sample 193	10/299	0.00293411	0.00827441	2.99516	17.4658	CST3;GRCC10;KRTCAP2;NDUFB7;FASN;SGTA;MT2;NDUFV1;C1QC;SNRPB	DiseasePerturbations_GEO UP
astrocytoma DOID-3069 human GSE15824 sample 860	10/299	0.00293411	0.00827441	2.99516	17.4658	RPLP1;RPLP0;ID3;LPL;RPL13A;APOE;RPL8;PPIB;TAC1;EEF2	DiseasePerturbations_GEO UP
Inflammatory papules (Acne) 6543 human GSE6475 sample 459	10/299	0.00293411	0.00827441	2.99516	17.4658	RPS26;COX8A;ATP5E;ARPC1B;RPS5;LCN2;TALDO1;UQCR11;PPIB;TOMM6	DiseasePerturbations_GEO UP
endometrial cancer DOID-1380 human GSE17025 sample 840	10/302	0.0031503	0.00837635	2.96393	17.073	NDUFB8;RPLP1;RPS5;RPLP0;ID3;RPL13A;FOS;FAU;RPS21;PFDN5	DiseasePerturbations_GEO DOWN
hepatitis C DOID-1883 human GSE20948 sample 598	10/302	0.0031503	0.00837635	2.96393	17.073	RPS26;COX8A;GPX4;TUBB3;TALDO1;ID3;FAU;PPIB;PFDN5;SOD1	DiseasePerturbations_GEO DOWN
Severe acute respiratory syndrome (SARS) C1175175 human GSE1739 sample 165	12/405	0.00315555	0.00837635	2.65252	15.2748	RPS26;ATP6V1G1;RPS5;COX4I1;RPLP0;RPLP2;RPL13A;FOS;RPL8;EEF2;PFDN5;SOD1	DiseasePerturbations_GEO DOWN
Parkinson's disease DOID-14330 human GSE19587 sample 740	8/207	0.00318669	0.008431	3.46508	19.92	RPLP1;RPL13A;MBP;RPL8;TAC1;TUBB4A;PFDN5;SOD1	DiseasePerturbations_GEO DOWN
Cancer of the Stomach C0024623 human GSE2685 sample 361	9/254	0.00321444	0.00847637	3.17284	18.2124	COX8A;CST3;MAP2K2;COX4I1;RPLP0;EIF4H;ID3;CKB;COX6A1	DiseasePerturbations_GEO DOWN
Erectile dysfunction associated with type 2 diabetes mellitus C1997651 rat GSE2457 sample 186	11/351	0.0030408	0.00854569	2.80561	16.2603	ALAS2;RPS5;COX4I1;RPLP0;EIF4H;LPL;APOE;FAU;RPL8;EEF2;RPS21	DiseasePerturbations_GEO UP
Tachycardia C0039231 rat GSE7999 sample 244	8/208	0.00328143	0.00862454	3.44758	19.7183	NDUFB7;NDUFB11;UQCRQ;ATP5E;COX4I1;LPL;UQCR11;SOD1	DiseasePerturbations_GEO DOWN
Appendicitis C0003615 human GSE9579 sample 98	10/302	0.0031503	0.00882301	2.96393	17.073	ATP6V1G1;ARPC1B;RPS5;EIF4H;TALDO1;RPL13A;FAU;PPIB;PFDN5;TOMM6	DiseasePerturbations_GEO UP
Aplastic anaemia C0002874 human GSE3807 sample 424	9/254	0.00321444	0.0089709	3.17284	18.2124	RPS26;ATP6V1G1;ABHD17A;BOLA2;RPLP0;RPL13A;UQCR11;EEF2;JUNB	DiseasePerturbations_GEO UP
acute myocardial infarction DOID-9408 mouse GSE775 sample 1003	10/303	0.00322512	0.0089709	2.95366	16.9445	EGLN2;LRP1;TUBB3;ARPC1B;RPLP0;LCN2;NME3;MT2;RPL8;COX6A1	DiseasePerturbations_GEO UP
esophagus squamous cell carcinoma DOID-3748 human GSE63941 sample 659	8/209	0.00337835	0.00936515	3.43025	19.5194	NDUFA8;RPS5;RPLP0;LCN2;RPL13A;RPL8;RPS21;SNRPB	DiseasePerturbations_GEO UP
relapsing-remitting multiple sclerosis DOID-2378 human GSE16461 sample 879	11/359	0.00360535	0.00944484	2.73998	15.4133	RPS26;ABHD17A;CDC37;ARPC1B;COX4I1;EIF4H;RPLP2;TKT;EEF2;SNRPB;SOD1	DiseasePerturbations_GEO DOWN
autism spectrum disorder DOID-0060041 human GSE28521 sample 1040	9/259	0.00365405	0.00952274	3.10858	17.4451	RPS26;TPPP3;MAG;VGF;MID1IP1;LPL;ABCB9;SH3GL2;VAT1L	DiseasePerturbations_GEO DOWN
Parkinson's disease DOID-14330 human GSE19587 sample 1080	7/167	0.00365893	0.00952274	3.76192	21.1066	NISCH;RPS26;METRN;RPLP1;RPL13A;MBP;TUBB4A	DiseasePerturbations_GEO DOWN
Polycystic Ovary Syndrome C0032460 human GSE6798 sample 292	10/306	0.00345811	0.00955376	2.92327	16.5663	COX8A;GRHPR;PRDX5;UQCRQ;RPLP1;RPS5;COX4I1;RPLP0;RPLP2;NDUFC2	DiseasePerturbations_GEO UP
Schizophrenia C0036341 human GSE12649 sample 261	11/358	0.00353051	0.00972082	2.74802	15.5162	NISCH;RPS26;ABHD17A;RPLP1;EIF4H;RPL13A;PTPRK;EEF2;PFDN5;SH3GL2;SOD1	DiseasePerturbations_GEO UP
Treacher Collins syndrome DOID-2908 mouse GSE10167 sample 480	9/258	0.00356256	0.00977604	3.12123	17.5952	NDUFA13;NDUFB6;RPLP1;RPS5;RPLP0;NME2;RPLP2;MT2;APOE	DiseasePerturbations_GEO UP
Fracture of femur C0015802 rat GSE1685 sample 240	7/168	0.00378078	0.00979601	3.73837	20.852	NDUFA8;ALAS2;NDUFB8;NDUFB10;NDUFS7;NDUFB6;ATP5E	DiseasePerturbations_GEO DOWN
Huntington's disease DOID-12858 human GSE1751 sample 795	8/213	0.00378844	0.00979601	3.36263	18.7494	CST3;BAG6;ALAS2;RPS5;AP2S1;TALDO1;RPLP2;EEF2	DiseasePerturbations_GEO DOWN
Cancer of Colon C0007102 human GSE4107 sample 245	11/362	0.00383754	0.00989096	2.71614	15.1097	RPS26;COX8A;PRDX5;UQCRQ;COX4I1;RPLP0;RPL13A;RPL8;COX6A1;EEF2;SOD1	DiseasePerturbations_GEO DOWN
Endometriosis C0014175 human GSE6364 sample 393	9/259	0.00365405	0.00999346	3.10858	17.4451	RPS26;UQCRQ;RPS5;RPLP0;FOS;CKB;FAU;JUNB;SOD1	DiseasePerturbations_GEO UP
inflammatory bowel disease DOID-0050589 human GSE4183 sample 551	9/263	0.00403863	0.0103758	3.059	16.8608	RPS5;COX4I1;PPP1R1B;RPLP0;RPL13A;CKB;RPL8;COX6A1;EEF2	DiseasePerturbations_GEO DOWN
invasive lobular carcinoma DOID-3457 human GSE5764 sample 625	10/313	0.00405396	0.0103818	2.85471	15.7239	DDR1;BAG6;FBL;COX4I1;RPLP0;RPL13A;FAU;RPL8;EEF2;SOD1	DiseasePerturbations_GEO DOWN
progressive myoclonus epilepsy DOID-891 mouse GSE47516 sample 518	9/261	0.00384257	0.0104739	3.0836	17.1498	MAG;PCSK1N;CELF4;MBP;GPR37L1;EIF2S3Y;DRD2;SCAF1;TUBB4A	DiseasePerturbations_GEO UP
diffuse large B-cell lymphoma DOID-0050745 mouse GSE6136 sample 687	11/366	0.00416558	0.0106335	2.68498	14.7161	FBL;NDUFB8;NDUFB6;NME2;EIF4H;MCM6;TKT;COX6A1;EEF2;FCGR2B;TOMM6	DiseasePerturbations_GEO DOWN
Duchenne muscular dystrophy DOID-11723 human GSE6011 sample 674	11/363	0.00391755	0.0106427	2.70829	15.0101	CST3;TPPP3;DDAH2;LAMB2;ARPC1B;PENK;RPLP0;FOS;CKB;PPIB;JUNB	DiseasePerturbations_GEO UP
cellular phase chronic idiopathic myelofibrosis 8106 human GSE3410 sample 460	8/218	0.00435406	0.0110793	3.28173	17.8416	CST3;UQCRQ;RPL13A;FOS;MCM6;COX6A1;PPIB;SNRPB	DiseasePerturbations_GEO DOWN
Dehydration C0011175 rat GSE4130 sample 23	11/370	0.00451562	0.0114539	2.65452	14.335	COX8A;NDUFB6;MID1IP1;PPP1R1B;STMN3;ID3;NDUFC2;FOS;CKB;DRD2;EEF2	DiseasePerturbations_GEO DOWN
autism spectrum disorder DOID-0060041 human GSE25507 sample 1031	10/315	0.00423832	0.0114759	2.8357	15.4931	RPS26;COX8A;CST3;ATP6V0B;RNASEK;ATP5E;TALDO1;MBP;FOS;PPIB	DiseasePerturbations_GEO UP
Type 2 diabetes mellitus C0011860 rat GSE2470 sample 238	9/268	0.00456311	0.0115377	2.99918	16.1648	CST3;KRTCAP2;DPM3;PCSK1N;FASN;LPL;CRYM;ADRA2A;TOMM6	DiseasePerturbations_GEO DOWN
nemaline myopathy DOID-3191 mouse GSE3384 sample 977	8/221	0.00472334	0.0119052	3.23501	17.3243	RPS26;NDUFA13;NDUFA7;RNASEK;NDUFB7;SGTA;FOS;PLEC	DiseasePerturbations_GEO DOWN
autism spectrum disorder DOID-0060041 human GSE25507 sample 1030	10/317	0.00442925	0.0119531	2.81694	15.2665	SF3B5;FBL;PRDX5;ARPC1B;COX4I1;RPLP0;TALDO1;TKT;PFDN5;SOD1	DiseasePerturbations_GEO UP
type 1 diabetes mellitus 9744 rat GSE4990 sample 474	11/373	0.00479319	0.0120433	2.63212	14.057	COX8A;CST3;ARPC1B;RPLP1;APOE;FOS;FAU;RPL8;JUNB;C1QC;SOD1	DiseasePerturbations_GEO DOWN
Type 1 diabetes mellitus C0011854 mouse GSE11 sample 173	10/321	0.00483143	0.0121013	2.78014	14.8254	COX8A;ZFP523;PDLIM2;CHPF;RPS5;FKBP8;FSCN1;ID3;FCGR2B;GIT1	DiseasePerturbations_GEO DOWN
Hypertension C0020538 mouse GSE1674 sample 400	10/318	0.00452722	0.0121772	2.80765	15.1547	RPS26;RNASEK;RPLP1;RPS5;RPLP0;FOS;SLC4A3;EEF2;JUNB;SOD1	DiseasePerturbations_GEO UP
endometrial cancer DOID-1380 human GSE17025 sample 848	9/273	0.00513925	0.0127828	2.94162	15.5049	NDUFB8;RPS5;ID3;RPLP2;EDF1;FOS;FAU;EEF2;PFDN5	DiseasePerturbations_GEO DOWN
endometrial cancer DOID-1380 human GSE17025 sample 845	9/273	0.00513925	0.0127828	2.94162	15.5049	RPLP1;RPS5;RPLP0;ID3;RPL13A;FOS;FAU;RPS21;PFDN5	DiseasePerturbations_GEO DOWN
autism spectrum disorder DOID-0060041 human GSE25507 sample 1027	10/324	0.0051515	0.0127828	2.75315	14.5049	RPS26;COX8A;ATP6V0B;RNASEK;RPLP0;SNHG8;TALDO1;FAU;TKT;RPS21	DiseasePerturbations_GEO DOWN
colorectal adenocarcinoma DOID-0050861 mouse GSE31106 sample 1070	9/270	0.00478719	0.0128341	2.97589	15.8967	RPLP1;RPLP0;NME2;LCN2;LPL;RPL13A;ROMO1;APOE;RPS21	DiseasePerturbations_GEO UP
endometriosis of ovary DOID-11432 human GSE7305 sample 939	10/321	0.00483143	0.012868	2.78014	14.8254	RPS26;LAMB2;RPLP1;SNHG8;FOS;FAU;JUNB;RPS21;PFDN5;SOD1	DiseasePerturbations_GEO UP
familial hypercholesterolemia DOID-13810 human GSE6088 sample 907	10/321	0.00483143	0.012868	2.78014	14.8254	RPS26;BAG6;NDUFB8;NDUFB11;ATP5E;RPS5;SPNS1;EEF2;JUNB;TOMM6	DiseasePerturbations_GEO UP
amyotrophic lateral sclerosis DOID-332 mouse GSE3343 sample 683	10/325	0.00526181	0.013016	2.74427	14.3999	COX8A;ALAS2;LRP1;ZFP428;CELF4;FOS;RPL8;TAC1;RPS21;CAMK2G	DiseasePerturbations_GEO DOWN
Escherichia coli infection of the central nervous system C1320188 mouse GSE3253 sample 341	11/375	0.00498565	0.0132355	2.61738	13.8753	CST3;TSC22D4;TPPP3;PCSK1N;GPX4;LCN2;STMN3;MT2;CKB;TUBB4A;CAMK2G	DiseasePerturbations_GEO UP
Hypoxia C0242184 human GSE4483 sample 440	9/275	0.0053849	0.0132794	2.91921	15.2504	COX8A;UCHL1;RNASEK;UQCRQ;COX4I1;TALDO1;MCM6;PPIB;SNRPB	DiseasePerturbations_GEO DOWN
prostate cancer DOID-10283 human GSE30174 sample 866	12/430	0.00506799	0.0134104	2.49066	13.1626	ATP6V1G1;ALAS2;ATP5E;ARPC1B;RPLP1;RPS5;RPLP0;RPL13A;RPL8;RPS21;PFDN5;SOD1	DiseasePerturbations_GEO UP
Duchenne muscular dystrophy (DMD) C0013264 mouse GSE1025 sample 144	10/324	0.0051515	0.0135873	2.75315	14.5049	NISCH;CST3;ATP6V1G1;UQCC2;MT2;APOE;FOS;RPL8;COX6A1;C1QC	DiseasePerturbations_GEO UP
endometrial cancer DOID-1380 human GSE17025 sample 841	10/328	0.00560388	0.0137769	2.71796	14.0907	NISCH;RPLP1;RPS5;RPLP0;ID3;RPL13A;FOS;FAU;RPS21;PFDN5	DiseasePerturbations_GEO DOWN
Parkinson's disease DOID-14330 human GSE6613 sample 788	9/274	0.00526096	0.013789	2.93037	15.377	RPS26;ATP6V0B;ARPC1B;TALDO1;RPLP2;UQCR11;FAU;TKT;CSNK1G2	DiseasePerturbations_GEO UP
Polycystic Ovary Syndrome C0032460 human GSE5090 sample 308	10/325	0.00526181	0.013789	2.74427	14.3999	CST3;UCHL1;GPX4;UQCRQ;ATP5E;LPL;NDUFC2;FOS;JUNB;SOD1	DiseasePerturbations_GEO UP
Alzheimer's disease DOID-10652 human GSE36980 sample 521	7/181	0.00566134	0.0138755	3.45677	17.8857	LRRTM1;CELF4;ASPHD2;TAC1;MET;TUBB4A;AVPI1	DiseasePerturbations_GEO DOWN
Sepsis C0243026 rat GSE1781 sample 314	8/226	0.00539171	0.0140841	3.16	16.5044	COX8A;GPX4;UQCRQ;FASN;MID1IP1;FKBP8;LCN2;RPS21	DiseasePerturbations_GEO UP
Polymyositis C0085655 human GSE3112 sample 227	9/279	0.00590342	0.0144246	2.87537	14.757	COX8A;NDUFA8;NDUFS7;NDUFB11;MID1IP1;UQCR11;RPL8;EEF2;CAMK2G	DiseasePerturbations_GEO DOWN
endometrial cancer DOID-1380 human GSE17025 sample 838	9/282	0.00631699	0.0153413	2.84333	14.4001	RPLP1;RPS5;RPLP0;ID3;RPL13A;FOS;FAU;RPS21;PFDN5	DiseasePerturbations_GEO DOWN
Adenocarcinoma of esophagus C0279628 human GSE1420 sample 164	9/282	0.00631699	0.0153413	2.84333	14.4001	COX8A;CST3;PDLIM2;RPS5;DCTN3;CKB;FAU;PKIG;EEF2	DiseasePerturbations_GEO DOWN
invasive ductal carcinoma DOID-3008 human GSE5764 sample 626	10/335	0.00646979	0.0156647	2.65846	13.4003	NISCH;GPX4;LAMB2;DCTN3;EIF4H;LPL;EDF1;FOS;RPL8;EEF2	DiseasePerturbations_GEO DOWN
diffuse large B-cell lymphoma DOID-0050745 mouse GSE6136 sample 688	10/337	0.00673537	0.0162585	2.64193	13.2107	RPS26;FBL;COX17;NME2;RPLP2;RPL13A;MCM6;TKT;COX6A1;FCGR2B	DiseasePerturbations_GEO DOWN
multiple myeloma DOID-9538 human GSE47552 sample 561	9/282	0.00631699	0.0164484	2.84333	14.4001	MRPL53;UCHL1;NDUFB6;RPS5;COX4I1;NDUFA2;RPLP2;PTPRK;FCGR2B	DiseasePerturbations_GEO UP
glaucoma associated with systemic syndromes DOID-1686 mouse GSE26299 sample 486	7/185	0.00636084	0.0164994	3.3784	17.0866	ABCA2;PCSK1N;SLC6A7;VGF;LCN2;JOSD2;CLEC18A	DiseasePerturbations_GEO UP
acute myocardial infarction DOID-9408 mouse GSE775 sample 1000	12/443	0.00637707	0.0164994	2.41391	12.2024	RPS26;ATP6V1G1;NDUFA13;NDUFB6;COX17;NDUFA2;TIMM13;LPL;UQCR11;MT2;FOS;JUNB	DiseasePerturbations_GEO UP
Uterine leiomyoma C0042133 human GSE2724 sample 225	10/338	0.0068713	0.0165366	2.63374	13.1171	NISCH;RPS26;CST3;RPLP1;PENK;RPLP2;FOS;FAU;PPIB;JUNB	DiseasePerturbations_GEO DOWN
mytonic dystrophy Type 1 DOID-11722 human GSE7179 sample 1049	9/283	0.00645969	0.0166603	2.83281	14.2835	SF3B5;GPX4;NDUFB11;RPLP1;RPS5;UQCR11;FOS;COX6A1;TOMM6	DiseasePerturbations_GEO UP
systemic lupus erythematosus DOID-9074 human GSE10325 sample 691	11/390	0.00663209	0.017051	2.51185	12.599	COX8A;CST3;ATP6V1G1;ATP6V0B;RPLP1;AP2S1;TALDO1;RPLP2;FOS;PPIB;FCGR2B	DiseasePerturbations_GEO UP
inflammatory bowel disease DOID-0050589 human GSE4183 sample 551	10/337	0.00673537	0.017262	2.64193	13.2107	ATP6V0B;TUBB3;ARPC1B;LCN2;TALDO1;FAU;PPIB;ADRA2A;C1QC;SOD1	DiseasePerturbations_GEO UP
peripartum cardiomyopathy DOID-9997 human GSE42955 sample 817	10/342	0.00743643	0.017843	2.60147	12.7508	SREBF1;MID1IP1;ADPRH;PITPNM2;FOS;JUNB;SMIM12;VAT1L;C1QC;SNRPB	DiseasePerturbations_GEO DOWN
myotonic dystrophy type 1 DOID-11722 human GSE7179 sample 1050	8/239	0.00746821	0.0178656	2.98019	14.5943	RPS26;PRDX5;SNHG8;EIF4H;RPL13A;PPIB;EEF2;PFDN5	DiseasePerturbations_GEO DOWN
Hypertrophy, Left Ventricular C0149721 rat GSE2116 sample 248	9/287	0.00705545	0.0180257	2.79148	13.8289	RPS26;UQCC2;PENK;LPL;RPL13A;APOE;EEF2;JUNB;SOD1	DiseasePerturbations_GEO UP
Anterior Horn Cell Disease C0154681 human GSE1481 sample 208	10/346	0.00803689	0.0191115	2.56997	12.3968	MAG;UQCRQ;ABHD17A;ATP5E;RPLP1;RPS5;MBP;FOS;PPIB;EEF2	DiseasePerturbations_GEO DOWN
Aplastic anaemia C0002874 human GSE3807 sample 424	10/346	0.00803689	0.0191115	2.56997	12.3968	CST3;BAG6;FBL;NDUFA13;ARPC1B;COX4I1;TALDO1;FOS;TKT;SNRPB	DiseasePerturbations_GEO DOWN
multiple myeloma DOID-9538 human GSE6691 sample 787	12/454	0.00768234	0.0195099	2.35249	11.4539	COX8A;FBL;NDUFA8;ATP6V0B;NDUFA13;COX17;TIMM13;FOS;RPL8;TKT;SNRPB;SOD1	DiseasePerturbations_GEO UP
cerebral palsy DOID-1969 human GSE31243 sample 877	9/291	0.00769247	0.0195099	2.75132	13.3921	RPS26;CST3;BAG6;RPS5;RPLP0;LPL;PKIG;RPS21;TOMM6	DiseasePerturbations_GEO UP
methylmalonic acidemia DOID-14749 mouse GSE41044 sample 476	10/344	0.00773216	0.0195099	2.58563	12.5723	RPS26;KRTCAP2;ALAS2;RPLP1;RPS5;COX4I1;RPLP0;LCN2;APOE;RPL8	DiseasePerturbations_GEO UP
breast cancer DOID-1612 human GSE9574 sample 448	10/344	0.00773216	0.0195099	2.58563	12.5723	NISCH;RPS26;COX8A;NDUFB8;RPLP1;NDUFC2;FAU;RPL8;RPS21;TOMM6	DiseasePerturbations_GEO UP
endometrial cancer DOID-1380 human GSE17025 sample 842	9/295	0.00837251	0.0198506	2.71228	12.9723	NISCH;RPLP1;RPLP0;ID3;RPL13A;FOS;FAU;RPS21;PFDN5	DiseasePerturbations_GEO DOWN
Rotavirus infection of children C1442797 human GSE2729 sample 43	9/293	0.008027	0.0201914	2.73166	13.1801	COX8A;COX4I1;RPLP0;NME2;EIF4H;RPL13A;FAU;JUNB;SNRPB	DiseasePerturbations_GEO UP
Niemann-Pick Type C DOID-14504 mouse GSE39621 sample 495	8/243	0.00821461	0.0205365	2.92886	14.0639	PRDX5;LRP1;LCN2;RPLP2;MT2;APOE;TKT;C1QC	DiseasePerturbations_GEO UP
autism spectrum disorder DOID-0060041 human GSE25507 sample 1025	8/243	0.00821461	0.0205365	2.92886	14.0639	RPS26;BAG6;GAA;FOS;FAU;RPL8;RPS21;PFDN5	DiseasePerturbations_GEO UP
Alpha-1 anti-trypsin deficiency C0221757 human GSE1122 sample 281	8/244	0.00840966	0.0208959	2.9163	13.9352	DDR1;GPX4;CDC37;PALM;FSCN1;FOS;JUNB;PRRC2A	DiseasePerturbations_GEO UP
Niemann-Pick Type C disease DOID-14504 mouse GSE39621 sample 471	8/244	0.00840966	0.0208959	2.9163	13.9352	PRDX5;LRP1;LCN2;RPLP2;MT2;APOE;TKT;C1QC	DiseasePerturbations_GEO UP
Carcinoma, Hepatocellular C0019204 mouse GSE2127 sample 300	9/298	0.00891186	0.0210668	2.68371	12.6681	GRHPR;NDUFA13;NDUFB7;LRP1;NDUFB11;NME2;UQCR11;FAU;COX6A1	DiseasePerturbations_GEO DOWN
liver cirrhosis DOID-5082 human GSE50892 sample 1012	9/299	0.00909738	0.0214419	2.67432	12.5687	COX8A;PCSK1N;NDUFA7;NDUFA2;LPL;FOS;CKB;JUNB;ATOX1	DiseasePerturbations_GEO DOWN
myelodysplastic syndrome DOID-0050908 human GSE19429 sample 749	9/300	0.00928581	0.0218217	2.66499	12.4702	RPS26;FBL;NDUFB8;RCC2;RPLP0;EIF4H;RPL8;PPIB;SNRPB	DiseasePerturbations_GEO DOWN
Atherosclerosis C0004153 mouse GSE363 sample 193	9/301	0.00947718	0.0222061	2.65573	12.3727	RPS26;SREBF1;PRDX5;ATP5E;TIMM13;UQCR11;APOE;COX6A1;SOD1	DiseasePerturbations_GEO DOWN
pancreatic invasive intraductal papillary-mucinous carcinoma DOID-8150 human GSE19650 sample 610	10/352	0.00900687	0.0223119	2.52411	11.888	KRTCAP2;UQCRQ;ATP5E;COX4I1;LCN2;TALDO1;UQCR11;COX6A1;RPS21;SOD1	DiseasePerturbations_GEO UP
Type 1 diabetes mellitus C0011854 mouse GSE2254 sample 204	7/200	0.00956693	0.0223508	3.11344	14.4758	GRCC10;MAG;RPS5;RPLP0;TMEM119;CKB;RPL8	DiseasePerturbations_GEO DOWN
Breast Cancer C0006142 mouse GSE2528 sample 28	9/299	0.00909738	0.0224678	2.67432	12.5687	RPS26;SREBF1;ATP6V1G1;RPS5;TNK2;LCN2;TMEM119;RPL13A;EEF2	DiseasePerturbations_GEO UP
Malignant Melanoma C0025202 human GSE3189 sample 117	8/250	0.00965377	0.0224879	2.84312	13.1932	NISCH;RPLP0;RPLP2;RPL13A;PTPRK;FOS;FAU;RPS21	DiseasePerturbations_GEO DOWN
Simian Acquired Immune Deficiency Syndrome C0080151 human GSE4785 sample 92	10/353	0.00917691	0.0225957	2.51662	11.8056	ATP6V0B;NDUFB8;UQCRQ;RCC2;BOLA2;ID3;PPIB;TOMM6;SNRPB;SOD1	DiseasePerturbations_GEO UP
dilated cardiomyopathy DOID-12930 human GSE42955 sample 678	9/303	0.00986886	0.0228856	2.63739	12.1805	SREBF1;MID1IP1;ADPRH;PITPNM2;FOS;JUNB;VAT1L;C1QC;SNRPB	DiseasePerturbations_GEO DOWN
autism spectrum disorder DOID-0060041 human GSE25507 sample 1025	10/357	0.00988176	0.0228856	2.4871	11.4831	PRDX5;ATP6V0B;ABHD17A;SNHG8;POLR2E;TALDO1;MBP;TKT;EEF2;SNRPB	DiseasePerturbations_GEO DOWN
juvenile dermatomyositis UMLS CUI-C0263666 human GSE11971 sample 771	5/111	0.0100492	0.023206	4.03179	18.5473	NDUFB11;RPLP1;RPL13A;CRYM;RPS21	DiseasePerturbations_GEO DOWN
myotonic dystrophy type 1 DOID-11722 human GSE7178 sample 1052	8/252	0.0100975	0.0232504	2.81953	12.9571	RPS26;FBL;RCC2;RPLP1;RPS5;RPLP0;RPL13A;EEF2	DiseasePerturbations_GEO DOWN
astrocytoma DOID-3069 human GSE15824 sample 861	9/301	0.00947718	0.0232648	2.65573	12.3727	RPLP1;RPS5;RPLP0;ID3;LPL;RPL13A;APOE;RPL8;PPIB	DiseasePerturbations_GEO UP
nasopharynx carcinoma DOID-9261 human GSE13597 sample 613	9/303	0.00986886	0.0241535	2.63739	12.1805	RPS26;GPX4;UQCRQ;RPLP1;RPLP0;RPL13A;APOE;COX6A1;SOD1	DiseasePerturbations_GEO UP
HIV - Human immunodeficiency virus infection C0019693 human GSE2504 sample 157	7/204	0.010592	0.0243189	3.0496	13.8686	RPS26;TUBB3;ATP5E;RPLP0;RPL13A;GIT1;TOMM6	DiseasePerturbations_GEO DOWN
endometrial cancer DOID-1380 human GSE17025 sample 842	9/305	0.0102726	0.0250665	2.6193	11.9919	RPS26;RNASEK;RCC2;EIF4H;TALDO1;RPL8;PPIB;EEF2;SNRPB	DiseasePerturbations_GEO UP
Obesity C0028754 mouse GSE4692 sample 319	9/309	0.0111174	0.0254522	2.58385	11.6254	RPS26;NDUFA8;ATP5E;RPS5;RPLP0;RPLP2;RPL13A;FAU;NDUFV1	DiseasePerturbations_GEO DOWN
Autism DOID-0060041 human GSE25507 sample 464	8/255	0.0107912	0.0262532	2.78485	12.6127	ABHD17A;ARPC1B;GAA;RPS5;FOS;RPL8;JUNB;PFDN5	DiseasePerturbations_GEO UP
acute myocardial infarction DOID-9408 mouse GSE775 sample 1001	9/308	0.0109015	0.0264426	2.59262	11.7157	RPLP1;COX17;LCN2;TMEM119;LPL;MT2;FOS;CKB;JUNB	DiseasePerturbations_GEO UP
multiple sclerosis DOID-2377 human GSE38010 sample 737	9/310	0.0113365	0.0274163	2.57513	11.5359	PCSK1N;NDUFB8;JPH3;ATP5E;CELF4;STMN3;COX6A1;CRYM;SH3GL2	DiseasePerturbations_GEO UP
AML - Acute myeloid leukemia C0023467 human GSE2191 sample 112	8/261	0.0122838	0.0280421	2.71797	11.9577	COX8A;ALAS2;UQCRQ;LCN2;TALDO1;UQCR11;FOS;SOD1	DiseasePerturbations_GEO DOWN
prostate cancer DOID-10283 human GSE3325 sample 991	9/315	0.012481	0.0283304	2.5324	11.1009	RPS5;COX4I1;SNHG8;ID3;RPL13A;FOS;CKB;RPL8;PFDN5	DiseasePerturbations_GEO DOWN
Cancer of the Intestine C0346627 mouse GSE3915 sample 90	9/315	0.012481	0.0283304	2.5324	11.1009	RPS26;FBL;KRTCAP2;NME2;RPL13A;APOE;PPIB;RPS21;SNRPB	DiseasePerturbations_GEO DOWN
endometriosis DOID-289 human GSE6364 sample 947	7/209	0.0119829	0.0288461	2.97336	13.155	RPS26;RPS5;RPLP0;RPL13A;FOS;FAU;JUNB	DiseasePerturbations_GEO UP
Zaire ebolavirus DOID-4325 human GSE31747 sample 497	9/313	0.0120133	0.0288461	2.54933	11.2725	COX8A;PITPNM1;ARPC1B;FSCN1;EIF4H;TALDO1;CKB;DRD2;JUNB	DiseasePerturbations_GEO UP
Dermatomyositis C0011633 human GSE1551 sample 130	10/368	0.012034	0.0288461	2.40931	10.6492	RPS26;COX8A;CST3;TPPP3;GPX4;TUBB3;UQCRQ;EIF4H;POLR2E;SOD1	DiseasePerturbations_GEO UP
Cystic Fibrosis C0010674 mouse GSE765 sample 65	9/314	0.0122455	0.0292671	2.54084	11.1863	UQCRQ;RPLP1;RPS5;RPLP0;RPL13A;UQCR11;CKB;RPL8;NDUFV1	DiseasePerturbations_GEO UP
Meningococcal infection C0025303 human GSE4646 sample 347	7/213	0.0131871	0.0298108	2.91503	12.6177	NISCH;UCHL1;SNRK;EGLN2;TUBB3;RPLP0;RPL13A	DiseasePerturbations_GEO DOWN
Generalized seizures C0234533 rat GSE1156 sample 342	9/318	0.0132078	0.0298108	2.50743	10.8495	ALAS2;RPLP0;NOS1AP;TALDO1;NDUFC2;MBP;EEF2;SH3GL2;SPTBN2	DiseasePerturbations_GEO DOWN
Uterine leiomyoma C0042133 human GSE2724 sample 225	8/262	0.0125466	0.0298991	2.70714	11.8527	RPS5;RPLP0;RPL13A;RPL8;TKT;COX6A1;EEF2;SOD1	DiseasePerturbations_GEO UP
Idiopathic fibrosing alveolitis C0085786 human GSE10921 sample 272	10/374	0.0133481	0.0299845	2.36886	10.2249	NDUFA8;NDUFB11;UQCRQ;RPS5;COX4I1;COX17;NME2;PKIG;COX6A1;PPIB	DiseasePerturbations_GEO DOWN
cervical cancer DOID-4362 human GSE9750 sample 619	8/265	0.0133598	0.0299845	2.67512	11.5445	RPS26;RPLP1;RPLP0;RPL13A;FOS;FAU;JUNB;PFDN5	DiseasePerturbations_GEO DOWN
Muscular Dystrophy C0026850 mouse GSE2507 sample 405	9/322	0.0142252	0.0318375	2.47488	10.525	RPS26;NDUFA7;UQCC2;GAA;RPS5;RPLP0;ROMO1;RPL8;EEF2	DiseasePerturbations_GEO DOWN
polycystic ovary syndrome DOID-11612 human GSE48301 sample 818	10/378	0.0142822	0.0318757	2.34263	9.95324	MRPL20;NDUFA8;PRDX5;NDUFB6;UQCC2;ATP5E;NDUFA2;TALDO1;UQCR11;ATOX1	DiseasePerturbations_GEO DOWN
Colitis C0009319 mouse GSE2172 sample 401	8/266	0.0136393	0.032314	2.66462	11.444	PRDX5;ATP6V0B;RPS5;SPNS1;FOS;NDUFV1;ATOX1;SOD1	DiseasePerturbations_GEO UP
APECED - Autoimmune polyendocrinopathy-candidiasis-ectodermal dystrophy C0085859 mouse GSE85 sample 6	8/266	0.0136393	0.032314	2.66462	11.444	RPS26;RPS5;RPLP0;COX17;MT2;RPL8;TKT;EEF2	DiseasePerturbations_GEO UP
Cardiomyopathy C0878544 human GSE1869 sample 79	8/270	0.0148	0.0329392	2.6234	11.0527	CST3;SREBF1;MID1IP1;CKB;SLC4A3;TKT;JUNB;SH3GL2	DiseasePerturbations_GEO DOWN
NASH C0400966 human GSE24807 sample 185	9/325	0.0150256	0.0332561	2.45101	10.2893	MRPL53;SF3B5;ATP6V0B;NDUFB10;COX17;NME2;LCN2;EEF2;MET	DiseasePerturbations_GEO DOWN
muscular dystrophy DOID-9884 human GSE42806 sample 530	9/325	0.0150256	0.0332561	2.45101	10.2893	RPS26;SF3B5;MAP2K2;NDUFB7;NDUFB10;MAP1S;MID1IP1;POLR2E;RPLP2	DiseasePerturbations_GEO DOWN
endometriosis DOID-289 human GSE6364 sample 946	7/216	0.0141457	0.0334166	2.87274	12.2331	RPS26;PENK;FOS;CKB;FAU;MCM6;SNRPB	DiseasePerturbations_GEO UP
prolactinoma DOID-5394 human GSE36314 sample 636	11/440	0.015342	0.0338626	2.21337	9.2456	COX8A;NDUFB8;FASN;NDUFA2;LCN2;ID3;FOS;PKIG;JUNB;SH3GL2;SOD1	DiseasePerturbations_GEO DOWN
endometriosis DOID-289 human GSE6364 sample 946	10/384	0.0157742	0.0347206	2.30434	9.56157	ATP6V1G1;PRDX5;TPPP3;NDUFA13;ATP5E;RPS5;TALDO1;NDUFC2;RPL13A;RPS21	DiseasePerturbations_GEO DOWN
Ulcerative Colitis C0009324 human GSE3365 sample 188	9/328	0.0158587	0.0348107	2.42758	10.06	NISCH;ATP6V1G1;ATP6V0B;EIF4H;RPL13A;RPL8;TKT;PFDN5;SNRPB	DiseasePerturbations_GEO DOWN
polycystic ovary syndrome DOID-11612 human GSE48301 sample 560	8/275	0.0163499	0.0357757	2.57361	10.5866	MRPL20;NDUFB6;UQCC2;ATP5E;COX17;NDUFA2;TALDO1;ATOX1	DiseasePerturbations_GEO DOWN
Primary pulmonary hypoplasia C0456891 mouse GSE1363 sample 20	9/330	0.0164326	0.0357757	2.41221	9.91052	NDUFB8;SNRK;UQCRQ;DDAH2;MID1IP1;TMEM119;FOS;JUNB;SNRPB	DiseasePerturbations_GEO DOWN
Nephrolithiasis C0392525 mouse GSE10162 sample 187	9/330	0.0164326	0.0357757	2.41221	9.91052	MRPL20;ATP6V1G1;ATP6V0B;PCX;NDUFB6;NME2;ID3;LPL;ATOX1	DiseasePerturbations_GEO DOWN
cellular phase chronic idiopathic myelofibrosis 8106 human GSE3410 sample 460	10/382	0.0152645	0.0359555	2.31697	9.69006	RPS26;ATP6V1G1;UCHL1;TALDO1;FAU;TKT;EEF2;RPS21;PFDN5;SOD1	DiseasePerturbations_GEO UP
bipolar disorder DOID-3312 human GSE12679 sample 544	8/276	0.0166735	0.0362014	2.56388	10.4963	ENHO;RNASEK;TUBB3;UQCRQ;RPLP0;RPL8;PKIG;EEF2	DiseasePerturbations_GEO DOWN
Osteoporosis C0029456 human GSE2208 sample 163	8/277	0.0170016	0.0368138	2.55421	10.407	TSC22D4;TPPP3;EGLN2;PDLIM2;ABHD17A;LCN2;FOS;JUNB	DiseasePerturbations_GEO DOWN
multiple myeloma DOID-9538 mouse GSE6980 sample 955	8/273	0.0157165	0.0369134	2.5933	10.7701	CST3;ALAS2;COX4I1;NDUFC2;MT2;APOE;MCM6;C1QC	DiseasePerturbations_GEO UP
schizophrenia DOID-5419 human GSE12679 sample 768	10/384	0.0157742	0.0369281	2.30434	9.56157	NDUFA13;NDUFB11;RPLP1;RPS5;RPLP0;TALDO1;RPL13A;EDF1;EEF2;AVPI1	DiseasePerturbations_GEO UP
Huntington's disease DOID-12858 human GSE24250 sample 466	7/221	0.0158525	0.0369281	2.80491	11.6247	CST3;ALAS2;ARPC1B;RPL13A;FAU;TKT;PFDN5	DiseasePerturbations_GEO UP
Ventilator-associated lung injury C0340257 mouse GSE2411 sample 355	9/328	0.0158587	0.0369281	2.42758	10.06	RPS26;ATP6V0B;1810037I17RIK;SNRK;RPS5;NME2;MT2;FOS;RPL8	DiseasePerturbations_GEO UP
diabetic retinopathy DOID-8947 mouse GSE12610 sample 911	8/278	0.0173344	0.0373321	2.54462	10.3186	CST3;MRPL20;RPS5;CWC22;MT2;ROMO1;EEF2;TOMM6	DiseasePerturbations_GEO DOWN
esophagus adenocarcinoma DOID-4914 human GSE1420 sample 644	8/278	0.0173344	0.0373321	2.54462	10.3186	COX8A;CST3;PDLIM2;RPS5;DCTN3;TALDO1;CKB;EEF2	DiseasePerturbations_GEO DOWN
Duchenne muscular dystrophy (DMD) C0013264 mouse GSE1472 sample 410	9/329	0.0161438	0.0374848	2.41987	9.98492	NISCH;GRCC10;LRP1;MT2;APOE;RPL8;COX6A1;PPIB;C1QC	DiseasePerturbations_GEO UP
juvenile dermatomyositis UMLS CUI-C0263666 human GSE11971 sample 772	12/503	0.0162239	0.0375639	2.11235	8.70558	COX8A;CST3;BAG6;ATP6V0B;NDUFA13;UQCRQ;PENK;RPLP0;EIF4H;NDUFC2;RPL8;SOD1	DiseasePerturbations_GEO UP
prostate cancer DOID-10283 human GSE55945 sample 834	8/275	0.0163499	0.0376418	2.57361	10.5866	RPS26;RCC2;PPP1R1B;RPLP0;RPL13A;PPIB;EEF2;RPS21	DiseasePerturbations_GEO UP
Obstructive sleep apnea C0520679 mouse GSE1873 sample 217	8/275	0.0163499	0.0376418	2.57361	10.5866	SREBF1;FASN;MID1IP1;MT2;FOS;MCM6;TKT;SNRPB	DiseasePerturbations_GEO UP
APECED - Autoimmune polyendocrinopathy-candidiasis-ectodermal dystrophy C0085859 mouse GSE85 sample 6	9/334	0.0176261	0.0378547	2.38203	9.61953	RNASEK;EGLN2;UQCRQ;ZMIZ2;PENK;TMEM119;ROMO1;FOS;COX6A1	DiseasePerturbations_GEO DOWN
endometriosis of ovary DOID-11432 human GSE7305 sample 939	8/279	0.0176719	0.0378547	2.5351	10.2311	COX8A;GPX4;NDUFB11;PENK;RPLP0;ID3;NDUFC2;PPIB	DiseasePerturbations_GEO DOWN
Type 2 diabetes mellitus C0011860 mouse GSE2899 sample 45	9/332	0.0170217	0.039078	2.39702	9.76372	RPS26;NDUFA8;DDT;RPLP1;RPS5;LCN2;BMYC;MT2;PPIB	DiseasePerturbations_GEO UP
Lung transplant rejection C0729958 human GSE2018 sample 66	9/335	0.0179341	0.0410569	2.3746	9.54839	FBL;ATP6V0B;RPLP1;RPS5;RPLP0;RPL13A;APOE;EEF2;RPS21	DiseasePerturbations_GEO UP
Down syndrome DOID-14250 human GSE19681 sample 1066	8/280	0.018014	0.0411244	2.52565	10.1446	RPS26;SREBF1;MID1IP1;RPLP0;SNHG8;PPIB;EEF2;JUNB	DiseasePerturbations_GEO UP
Anaplasmosis C0002797 human GSE2600 sample 21	7/227	0.018088	0.0411781	2.72757	10.9444	GPX4;TUBB3;CDC37;RCC2;RPLP0;RPL13A;RPL8	DiseasePerturbations_GEO UP
endometriosis DOID-289 human GSE6364 sample 945	8/282	0.0187125	0.0424811	2.50696	9.9741	RPS26;UQCRQ;RPLP1;RPS5;LCN2;FOS;PFDN5;C1QC	DiseasePerturbations_GEO UP
Cystic Fibrosis C0010674 mouse GSE765 sample 65	8/286	0.0201674	0.043085	2.47038	9.6436	GRCC10;SREBF1;PRDX5;GPX4;MT2;EDF1;FOS;PLEC	DiseasePerturbations_GEO DOWN
myelodysplastic syndrome DOID-0050908 human GSE19429 sample 750	8/283	0.019069	0.04317	2.49772	9.89019	NDUFA8;ARPC1B;COX4I1;SNHG8;TALDO1;RPS21;PFDN5;SOD1	DiseasePerturbations_GEO UP
glioblastoma UMLS CUI-C0017636 human GSE15824 sample 863	8/284	0.0194303	0.0438661	2.48854	9.80715	RPLP1;RPLP0;ID3;LPL;APOE;FAU;PPIB;TAC1	DiseasePerturbations_GEO UP
melanoma in situ UMLS CUI-C0346040 human GSE4587 sample 980	10/404	0.0215907	0.0460026	2.18511	8.38097	NISCH;RPS26;FBL;RPS5;LPL;FOS;FAU;RPL8;PPIB;EEF2	DiseasePerturbations_GEO DOWN
Breast Cancer C0006142 rat GSE1872 sample 63	7/233	0.0205368	0.0462362	2.65434	10.3135	RPS26;NCOR2;KRTCAP2;PENK;RPLP0;LCN2;RPS21	DiseasePerturbations_GEO UP
head and neck squamous cell carcinoma 5520 human GSE6631 sample 458	7/237	0.0222923	0.0473711	2.60765	9.91822	RPS5;RPLP2;RPL13A;FOS;FAU;JUNB;PFDN5	DiseasePerturbations_GEO DOWN
Muscular Dystrophy C0026850 mouse GSE3252 sample 158	7/238	0.0227469	0.048209	2.59623	9.82237	NDUFA13;NDUFB11;FASN;COX4I1;NME2;LPL;UQCR11	DiseasePerturbations_GEO DOWN
esophagus squamous cell carcinoma DOID-3748 human GSE63941 sample 658	10/408	0.02292	0.0484472	2.1627	8.16582	RPS26;UCHL1;UQCRQ;ATP5E;ARPC1B;TALDO1;ID3;PTPRK;PPIB;PFDN5	DiseasePerturbations_GEO DOWN
Psoriasis vulgaris C0263361 human GSE6710 sample 444	8/290	0.0217012	0.0485893	2.43484	9.32639	RPS26;ATP6V1G1;TUBB3;UQCRQ;AP2S1;LCN2;FAU;PPIB	DiseasePerturbations_GEO UP
cardiomyopathy DOID-0050700 human GSE9128 sample 781	8/290	0.0217012	0.0485893	2.43484	9.32639	ALAS2;NDUFS7;CDC37;POLR2E;FOS;TKT;FCGR2B;PLEC	DiseasePerturbations_GEO UP
myelodysplastic syndrome DOID-0050908 human GSE19429 sample 812	8/291	0.0220972	0.0493404	2.42611	9.24908	ARPC1B;RPS5;RPLP0;TALDO1;FAU;PPIB;TOMM6;SOD1	DiseasePerturbations_GEO UP
bronchopulmonary dysplasia UMLS CUI-C0006287 human GSE8586 sample 919	8/295	0.0237324	0.0500322	2.39181	8.94755	RPS26;ABHD17A;RPLP0;RPL13A;FOS;PKIG;EEF2;JUNB	DiseasePerturbations_GEO DOWN
nemaline myopathy DOID-3191 mouse GSE3384 sample 973	6/188	0.0239298	0.0503155	2.81919	10.523	NDUFA13;UQCRQ;RPLP1;GAA;MID1IP1;FKBP8	DiseasePerturbations_GEO DOWN
Cancer of prostate C0376358 mouse GSE1413 sample 48	8/294	0.0233159	0.0519193	2.4003	9.0218	RPS26;PRDX5;1810037I17RIK;ARPC1B;TALDO1;UQCR11;FAU;TAC1	DiseasePerturbations_GEO UP
Rift Valley fever DOID-1328 mouse GSE18064 sample 876	7/240	0.0236753	0.052576	2.57368	9.6341	CST3;NDUFA13;NDUFB6;PENK;MT2;FOS;PPIB	DiseasePerturbations_GEO UP
hepatitis C DOID-1883 human GSE20948 sample 598	8/298	0.0250134	0.0553966	2.3667	8.72921	ATP6V0B;RPLP1;RPLP0;SNHG8;RPL13A;RPL8;EEF2;SNRPB	DiseasePerturbations_GEO UP
progressive myoclonus epilepsy DOID-891 mouse GSE47516 sample 517	10/415	0.0253876	0.0560728	2.12455	7.80454	CST3;FSCN1;LCN2;ID3;LPL;APOE;TAC1;CRYM;SCAF1;C1QC	DiseasePerturbations_GEO UP
prostate cancer DOID-10283 human GSE3325 sample 990	8/304	0.0277192	0.0581304	2.31801	8.31154	NDUFA13;UQCRQ;COX4I1;PENK;TALDO1;ID3;CKB;PFDN5	DiseasePerturbations_GEO DOWN
prostate cancer DOID-10283 human GSE3868 sample 639	9/362	0.0278115	0.0581712	2.18993	7.84499	RPS26;GPX4;LRP1;ARPC1B;RPS5;TKT;EEF2;AVPI1;SOD1	DiseasePerturbations_GEO DOWN
MDS - Myelodysplastic syndrome C0026986 human GSE4619 sample 206	8/305	0.0281892	0.0588072	2.31009	8.24429	RNASEK;GPX4;RCC2;RPLP1;RPS5;EIF4H;RPLP2;FOS	DiseasePerturbations_GEO DOWN
Retinoschisis C0152439 mouse GSE5581 sample 146	6/196	0.0285768	0.0594607	2.69938	9.59672	COX8A;RPLP1;RPS5;COX4I1;RPLP2;CKB	DiseasePerturbations_GEO DOWN
bronchopulmonary dysplasia UMLS CUI-C0006287 human GSE8586 sample 918	9/364	0.0286701	0.0594999	2.17737	7.73378	RNASEK;EIF4H;ID3;FOS;CKB;PKIG;EEF2;JUNB;RPS21	DiseasePerturbations_GEO DOWN
endometrial cancer DOID-1380 human GSE17025 sample 843	8/305	0.0281892	0.0620924	2.31009	8.24429	FBL;RCC2;EIF4H;RPL8;PPIB;TAC1;SNRPB;SOD1	DiseasePerturbations_GEO UP
melanoma in situ UMLS CUI-C0346040 human GSE4587 sample 980	6/196	0.0285768	0.0627766	2.69938	9.59672	CST3;UQCRQ;ARPC1B;NDUFC2;APOE;C1QC	DiseasePerturbations_GEO UP
cystic fibrosis DOID-1485 mouse GSE3100 sample 1056	7/255	0.0314812	0.0651644	2.41615	8.35594	SNRK;FASN;LPL;MT2;FOS;MET;AVPI1	DiseasePerturbations_GEO DOWN
Rhinovirus infection C0276447 human GSE11348 sample 324	7/256	0.0320561	0.066183	2.40633	8.27841	RPS26;TPPP3;TUBB3;RPS5;BOLA2;RPL8;CRYM	DiseasePerturbations_GEO DOWN
Leukemia, Chronic T-Cell C2363142 human GSE5788 sample 74	8/313	0.0321488	0.0662033	2.24857	7.7292	RPS26;EIF4H;RPLP2;FAU;COX6A1;JUNB;PFDN5;SOD1	DiseasePerturbations_GEO DOWN
Teratospermia UMLS CUI-C0919628 human GSE6872 sample 953	9/372	0.0322912	0.0663256	2.1285	7.30706	FBL;NDUFA13;GPX4;RPLP0;LCN2;PIN1;RPL13A;RPL8;EEF2	DiseasePerturbations_GEO DOWN
Bacterial Infection C0004623 human GSE4748 sample 414	8/316	0.033727	0.0690972	2.22633	7.54604	RPS26;ATP5E;RPLP1;COX4I1;EIF4H;RPLP2;RPS21;TOMM6	DiseasePerturbations_GEO DOWN
myelodysplastic syndrome DOID-0050908 human GSE19429 sample 750	8/317	0.0342646	0.0700191	2.21901	7.48614	RPS26;PRDX5;ATP6V0B;NDUFB8;RPS5;EIF4H;FOS;SNRPB	DiseasePerturbations_GEO DOWN
facioscapulohumeral muscular dystrophy DOID-11727 human GSE15090 sample 540	9/372	0.0322912	0.0707454	2.1285	7.30706	RPS26;COX8A;NDUFB8;RNASEK;NDUFB10;COX4I1;RPLP0;RPL13A;PPIB	DiseasePerturbations_GEO UP
Leukemia, Acute Megakaryocytic C0023462 mouse GSE2433 sample 95	8/318	0.0348081	0.070948	2.21174	7.42681	NDUFA13;RNASEK;TUBB3;MID1IP1;NME2;LPL;CKB;PPIB	DiseasePerturbations_GEO DOWN
Barrett's esophagus DOID-9206 human GSE1420 sample 643	8/314	0.0326691	0.0713816	2.24111	7.66757	ATP6V0B;ARPC1B;LCN2;EIF4H;NDUFC2;PTPRK;FOS;PPIB	DiseasePerturbations_GEO UP
Primary open angle glaucoma C0339573 human GSE4316 sample 284	9/373	0.0327651	0.0714	2.12254	7.25569	COX8A;PENK;ID3;ROMO1;FAU;RPL8;TAC1;PFDN5;SOD1	DiseasePerturbations_GEO UP
Adenocarcinoma of lung C0152013 human GSE1987 sample 431	8/319	0.0353573	0.0718841	2.20451	7.36804	LAMB2;RPS5;FSCN1;ID3;LPL;PPIB;JUNB;PFDN5	DiseasePerturbations_GEO DOWN
Uterine leiomyoma C0042133 human GSE2725 sample 399	7/258	0.033227	0.0722133	2.38691	8.12597	PCSK1N;GPX4;RPLP1;RPLP0;RPL13A;RPL8;TKT	DiseasePerturbations_GEO UP
Cushing Syndrome C0010481 human GSE4060 sample 1	8/316	0.033727	0.0731052	2.22633	7.54604	COX8A;NDUFA13;UQCRQ;ATP5E;PENK;APOE;RPS21;PFDN5	DiseasePerturbations_GEO UP
Hereditary gingival fibromatosis C0399440 human GSE4250 sample 177	8/321	0.0364733	0.0739649	2.1902	7.25214	PRDX5;RNASEK;UQCRQ;ATP5E;LCN2;TALDO1;FOS;JUNB	DiseasePerturbations_GEO DOWN
ulcerative colitis DOID-8577 human GSE22619 sample 710	7/264	0.03691	0.0744724	2.33047	7.68884	PRDX5;PCSK1N;LRFN4;NDUFB10;PPP1R1B;CKB;C1QC	DiseasePerturbations_GEO DOWN
autism spectrum disorder DOID-0060041 human GSE28521 sample 1039	7/264	0.03691	0.0744724	2.33047	7.68884	NISCH;NDUFS7;VGF;GAA;PENK;LPL;FOS	DiseasePerturbations_GEO DOWN
MS (Multiple Sclerosis) C0026769 human GSE10064 sample 377	7/264	0.03691	0.0797921	2.33047	7.68884	ATP6V0B;NDUFB11;DDT;RPLP1;COX17;AP2S1;SNRPB	DiseasePerturbations_GEO UP
smoldering myeloma DOID-9551 human GSE47552 sample 562	8/322	0.0370401	0.0798616	2.18311	7.19501	RPS26;UCHL1;NDUFB6;COX4I1;RPLP2;PTPRK;FCGR2B;RPS21	DiseasePerturbations_GEO UP
multiple myeloma DOID-9538 mouse GSE6980 sample 955	8/327	0.0399634	0.0804301	2.14834	6.91722	2410006H16RIK;RPS5;ID3;RPL13A;FOS;FAU;FCGR2B;RPS21	DiseasePerturbations_GEO DOWN
bipolar disorder DOID-3312 human GSE5392 sample 573	9/388	0.0404629	0.0812308	2.03696	6.53329	TPPP3;MID1IP1;NDUFC2;UQCR11;MBP;RPL8;COX6A1;CRYM;TUBB4A	DiseasePerturbations_GEO DOWN
myelodysplastic syndrome DOID-0050908 human GSE19429 sample 747	8/324	0.0381915	0.0821269	2.16907	7.08233	NDUFA8;SNHG8;TALDO1;EDF1;EEF2;RPS21;TOMM6;SOD1	DiseasePerturbations_GEO UP
asthma DOID-2841 human GSE18965 sample 753	9/389	0.0410161	0.0821351	2.0315	6.48818	RPS26;NDUFS7;METRN;CDC37;LCN2;LPL;FOS;TKT;EEF2	DiseasePerturbations_GEO DOWN
multiple sclerosis DOID-2377 human GSE26484 sample 742	8/329	0.0411746	0.0822463	2.13474	6.80967	RPS26;RPS5;RPLP0;RPLP2;FAU;RPL8;PPIB;SOD1	DiseasePerturbations_GEO DOWN
autism spectrum disorder DOID-0060041 human GSE25507 sample 1026	8/330	0.0417894	0.0832661	2.128	6.75664	ATP6V0B;RNASEK;ARPC1B;RPLP0;TALDO1;MBP;TKT;PPIB	DiseasePerturbations_GEO DOWN
myelodysplastic syndrome DOID-0050908 human GSE19429 sample 748	7/273	0.0429236	0.0853133	2.25058	7.08557	RPS26;RNASEK;RCC2;RPLP0;EIF4H;RPL13A;SNRPB	DiseasePerturbations_GEO DOWN
endometrial cancer DOID-1380 human GSE17025 sample 845	8/327	0.0399634	0.0857109	2.14834	6.91722	RCC2;EIF4H;TALDO1;RPL8;PPIB;TAC1;SNRPB;SOD1	DiseasePerturbations_GEO UP
Nephrolithiasis C0392525 mouse GSE10162 sample 187	7/270	0.040853	0.0873889	2.2766	7.28005	RPLP1;RPS5;RPLP2;FOS;RPL8;CRYM;MET	DiseasePerturbations_GEO UP
autism spectrum disorder DOID-0060041 human GSE25507 sample 1022	8/334	0.0443091	0.0878486	2.10146	6.54933	RPS26;CST3;ATP6V0B;ARPC1B;TALDO1;FOS;TKT;JUNB	DiseasePerturbations_GEO DOWN
Endometriosis C0014175 human GSE7305 sample 149	8/330	0.0417894	0.0891579	2.128	6.75664	RPS26;RPLP1;RPS5;PENK;SNHG8;CKB;RPL8;SOD1	DiseasePerturbations_GEO UP
Rett Syndrome C0035372 human GSE6955 sample 390	6/219	0.0451179	0.0892307	2.40507	7.45205	SLC6A7;MAG;PENK;FOS;BAIAP2;JUNB	DiseasePerturbations_GEO DOWN
systemic lupus erythematosus DOID-9074 mouse GSE2376 sample 633	8/331	0.0424101	0.0902461	2.1213	6.7041	PRDX5;NDUFA13;ALAS2;RPLP1;NME2;EIF4H;RPL13A;EEF2	DiseasePerturbations_GEO UP
glaucoma associated with systemic syndromes DOID-1686 mouse GSE26299 sample 490	8/332	0.043037	0.0913416	2.11465	6.65203	VGF;LCN2;MT2;FOS;QRFPR;CRYM;JUNB;C1QC	DiseasePerturbations_GEO UP
retinoblastoma DOID-768 mouse GSE6787 sample 455	9/393	0.0432803	0.0913821	2.00992	6.31127	NISCH;GRCC10;SREBF1;NDUFB11;DDAH2;FSCN1;TMEM119;APOE;EEF2	DiseasePerturbations_GEO UP
Setleis syndrome C1744559 human GSE16524 sample 285	9/393	0.0432803	0.0913821	2.00992	6.31127	RPS26;GPX4;TUBB3;RPS5;FOS;RPL8;PKIG;EEF2;AVPI1	DiseasePerturbations_GEO UP
osteoarthritis DOID-8398 human GSE16464 sample 752	9/394	0.0438593	0.0923652	2.0046	6.26791	RPS26;FBL;TUBB3;ARPC1B;TALDO1;ID3;MCM6;PPIB;SNRPB	DiseasePerturbations_GEO UP
Protozoan Infection C0033740 human GSE2077 sample 239	8/334	0.0443091	0.0928999	2.10146	6.54933	RPS26;CDC37;ARPC1B;BOLA2;RPLP0;MCM6;TUBB4A;SNRPB	DiseasePerturbations_GEO UP
Cardiac Failure C0018801 mouse GSE1988 sample 273	7/275	0.0443412	0.0928999	2.23355	6.9594	RPS26;NDUFA8;ALAS2;LPL;MT2;FAU;EEF2	DiseasePerturbations_GEO UP
Purpura, Idiopathic Thrombocytopenic C0043117 human GSE574 sample 358	3/69	0.0476508	0.0940074	3.85952	11.7478	RPLP1;RPL13A;RPS21	DiseasePerturbations_GEO DOWN
Diabetes and Obesity DOID-9970 mouse GSE54917 sample 807	7/282	0.049539	0.0974917	2.17592	6.53862	UCHL1;DCTN1;ID3;ABCB9;FOS;SLC4A3;JUNB	DiseasePerturbations_GEO DOWN
rheumatoid arthritis DOID-7148 human GSE15573 sample 904	7/279	0.0472661	0.0985214	2.20025	6.71509	ALAS2;UQCRQ;ATP5E;RPS5;LCN2;FAU;PFDN5	DiseasePerturbations_GEO UP
Type 1 diabetes mellitus C0011854 mouse GSE11 sample 173	7/279	0.0472661	0.0985214	2.20025	6.71509	NCOR2;TUBB3;TALDO1;NME3;JOSD2;NDUFV1;CSNK1G2	DiseasePerturbations_GEO UP
autism spectrum disorder DOID-0060041 human GSE28521 sample 1040	8/341	0.0489559	0.101783	2.05654	6.20424	C1QTNF4;ARHGAP33;BTBD17;METRN;ID3;APOE;TKT;C1QC	DiseasePerturbations_GEO UP
